# Supplementary material for: Chromatin Accessibility Identifies Regulatory Elements Predictive of Gene Expression and Disease Outcome in Multiple Myeloma
Source: Oxford University Press journal article supplement (doi:10.1158/1078-0432.ccr-20-2931), 2021-03-17
Supplement: 10780432ccr202931-sup-248275_3_supp_6952781_qp7226.xlsx [file 10780432ccr202931-sup-248275_3_supp_6952781_qp7226.xlsx]

## Sheet: Supp Data 2 v1
Supplementary Data 2. Regulatory element transcription in newly diagnosed myelomas from CoMMpass.
chr	start	end	GRCh37.tsSymbol	GRCh37.tsKg	GRCh37.tsDist	GRCh37.tsStart	GRCh37.tsEnd	GRCh37.tsStrand	samples	detected.samples	filter	MS.logFC	MS.logCPM	MS.PValue	MS.fdr	MS.sig	HY.logFC	HY.logCPM	HY.PValue	HY.fdr	HY.sig	PR.logFC	PR.logCPM	PR.PValue	PR.fdr	PR.sig	CD.logFC	CD.logCPM	CD.PValue	CD.fdr	CD.sig	MF.logFC	MF.logCPM	MF.PValue	MF.fdr	MF.sig	LB.logFC	LB.logCPM	LB.PValue	LB.fdr	LB.sig	MY.logFC	MY.logCPM	MY.PValue	MY.fdr	MY.sig
1	895190	895466	KLHL17	ENSG00000187961	-500	895967	901095	+	768	62	TRUE	-0.2028	4.51486	0.363055	1	FALSE	-0.122272	4.51487	0.438188	1	FALSE	0.12769	4.51486	0.384166	1	FALSE	-0.167508	4.51487	0.537654	1	FALSE	-0.341459	4.51487	0.268556	1	FALSE	0.569466	4.51487	0.00201801	1	FALSE	-0.432137	4.51484	0.100122	1	FALSE
1	954921	955002	AGRN	ENSG00000188157	-500	955503	991496	+	768	84	TRUE	-0.191405	4.38123	0.423902	1	FALSE	0.421391	4.38125	0.0403304	1	FALSE	-0.214471	4.38124	0.466338	1	FALSE	0.326991	4.38125	0.115144	1	FALSE	-0.19131	4.38124	0.736665	1	FALSE	-0.357029	4.38126	0.110599	1	FALSE	-0.267189	4.38116	0.549345	1	FALSE
1	1052242	1052367	C1orf159	ENSG00000131591	-500	1022570	1051741	-	768	69	TRUE	-1.45266	4.38135	1.90757e-07	0.00234555	TRUE	-0.699001	4.38135	0.000669244	1	FALSE	0.4168	4.38135	0.0283315	1	FALSE	-0.653657	4.38135	0.00650299	1	FALSE	-0.192836	4.38135	0.71596	1	FALSE	1.32168	4.38135	4.2994e-13	5.38973e-09	TRUE	-0.281565	4.38136	0.513699	1	FALSE
1	1057502	1058259	C1orf159	ENSG00000131591	-5760	1022570	1051741	-	768	2	FALSE	-0.0686034	4.1272	1	1	FALSE	-0.169974	4.12721	0.497636	1	FALSE	0.0891716	4.12721	0.581603	1	FALSE	0.0929263	4.12721	0.62046	1	FALSE	-0.203467	4.12721	1	1	FALSE	0.207924	4.12721	0.207693	1	FALSE	-0.208168	4.12719	0.733615	1	FALSE
1	1071013	1071896	RP11-465B22.5	ENSG00000223823	-500	1072397	1079436	+	768	11	FALSE	-1.83063	4.38772	1.67073e-06	0.0200856	FALSE	-1.32081	4.38771	1.45062e-06	0.0166299	FALSE	-0.070701	4.38772	0.889303	1	FALSE	-0.40726	4.38771	0.155877	1	FALSE	-1.10021	4.38771	0.0367201	1	FALSE	2.17881	4.38771	3.25862e-22	4.25608e-18	FALSE	-0.759358	4.38775	0.0963053	1	FALSE
1	1084588	1086237	RP11-465B22.5	ENSG00000223823	5151	1072397	1079436	+	768	0	FALSE	-0.488904	4.40603	0.116507	1	FALSE	-1.17212	4.40607	1.95306e-06	0.0222864	FALSE	0.038164	4.40605	0.823372	1	FALSE	0.231718	4.40606	0.370802	1	FALSE	-0.139082	4.40606	0.900297	1	FALSE	1.33559	4.40608	2.03312e-08	0.000241392	FALSE	-1.39642	4.40594	0.00111096	1	FALSE
1	1092777	1094213	MIR200B	ENSG00000207730	-8270	1102484	1102578	+	768	142	TRUE	-1.06425	5.86775	1.975e-08	0.000247112	TRUE	-0.606382	5.86782	1.03625e-05	0.114744	FALSE	-0.78278	5.86778	5.79985e-09	7.32869e-05	TRUE	0.858231	5.8678	5.96988e-11	7.62295e-07	TRUE	0.0679805	5.86779	0.803673	1	FALSE	0.798295	5.86783	3.56378e-09	4.29364e-05	TRUE	0.188805	5.8676	0.290855	1	FALSE
1	1209766	1210102	RP5-902P8.10	ENSG00000230415	-500	1210603	1215800	+	768	764	TRUE	0.0711461	8.46775	0.443779	1	FALSE	-0.219338	8.46775	0.00411053	1	FALSE	0.341034	8.46775	1.5461e-06	0.0185578	FALSE	0.303761	8.46775	0.000191969	1	FALSE	-0.447241	8.46775	0.00351857	1	FALSE	-0.450706	8.46775	2.94194e-07	0.00339558	FALSE	-0.132896	8.46775	0.25256	1	FALSE
1	1311376	1311897	AURKAIP1	ENSG00000175756	-500	1309110	1310875	-	768	187	TRUE	-0.159526	5.28176	0.373912	1	FALSE	-0.432159	5.28181	0.000515128	1	FALSE	-0.499728	5.28178	3.88439e-05	0.441266	FALSE	0.0316933	5.2818	0.795322	1	FALSE	-0.13165	5.28179	0.548465	1	FALSE	0.995058	5.28182	2.08268e-17	2.6775e-13	TRUE	0.0488256	5.28163	0.86951	1	FALSE
1	1343194	1343566	MRPL20	ENSG00000242485	-500	1337288	1342693	-	768	687	TRUE	-0.524542	7.01064	5.30688e-06	0.0628707	FALSE	-0.0936327	7.01069	0.310886	1	FALSE	-0.0739346	7.01065	0.398635	1	FALSE	-0.0597555	7.01067	0.500621	1	FALSE	0.0249984	7.01067	0.935727	1	FALSE	0.516417	7.01069	1.47262e-08	0.000175429	FALSE	0.0673999	7.01052	0.620806	1	FALSE
1	1440230	1441940	ATAD3A	ENSG00000197785	-5590	1447531	1470065	+	768	541	TRUE	-0.044099	7.28393	0.734764	1	FALSE	0.170834	7.28391	0.0225776	1	FALSE	0.136209	7.28392	0.0608309	1	FALSE	-0.516175	7.28392	7.79062e-10	9.82319e-06	FALSE	-0.371755	7.28392	0.0127874	1	FALSE	0.0727142	7.28391	0.44044	1	FALSE	0.244239	7.28396	0.0215503	1	FALSE
1	1446261	1447030	ATAD3A	ENSG00000197785	-500	1447531	1470065	+	768	767	TRUE	-0.0930835	8.72733	0.258646	1	FALSE	-0.352502	8.72733	9.58638e-09	0.000116781	FALSE	-0.088343	8.72733	0.140041	1	FALSE	0.391364	8.72733	7.55984e-10	9.53447e-06	FALSE	0.21273	8.72733	0.0485127	1	FALSE	0.0339274	8.72733	0.628274	1	FALSE	0.0647154	8.72733	0.482345	1	FALSE
1	1624668	1625478	SLC35E2B	ENSG00000189339	-500	1592940	1624167	-	768	697	TRUE	-0.319953	7.59865	0.000953699	1	FALSE	0.167604	7.59865	0.0240172	1	FALSE	-0.263003	7.59865	0.000262155	1	FALSE	-0.0639938	7.59865	0.423635	1	FALSE	0.189983	7.59865	0.134575	1	FALSE	0.388135	7.59865	1.09093e-06	0.0123941	FALSE	-0.16089	7.59865	0.180805	1	FALSE
1	1829098	1829513	RP1-140A9.1	ENSG00000231050	5000	1822910	1824097	+	768	104	TRUE	-0.413387	4.65048	0.0206343	1	FALSE	0.287889	4.65054	0.0464357	1	FALSE	0.31617	4.6505	0.0135248	1	FALSE	-0.0708688	4.65052	0.766082	1	FALSE	0.134218	4.65052	0.412044	1	FALSE	-0.503072	4.65055	0.0038592	1	FALSE	-0.169735	4.65034	0.375192	1	FALSE
1	1837741	1842111	CALML6	ENSG00000169885	-4154	1846266	1848733	+	768	657	TRUE	0.0167412	8.88821	0.869306	1	FALSE	0.00521884	8.88822	0.934907	1	FALSE	0.261526	8.88822	0.000394217	1	FALSE	-0.186325	8.88822	0.0356217	1	FALSE	0.489065	8.88822	0.000330429	1	FALSE	-0.158775	8.88822	0.0788524	1	FALSE	-0.532099	8.88819	1.12025e-05	0.148456	FALSE
1	2158031	2159564	SKI	ENSG00000157933	-569	2160134	2241558	+	768	130	TRUE	0.51336	5.90316	0.000726631	1	FALSE	-0.458689	5.9033	0.000436159	1	FALSE	-0.656192	5.90321	3.54617e-07	0.00434264	FALSE	-0.196411	5.90326	0.159885	1	FALSE	0.771971	5.90325	0.000152228	1	FALSE	0.573533	5.90332	1.55151e-05	0.169332	FALSE	0.0301253	5.90283	0.768013	1	FALSE
1	2246559	2247691	SKI	ENSG00000157933	5000	2160134	2241558	+	768	227	TRUE	0.720628	5.89961	1.23689e-05	0.144543	FALSE	-1.23773	5.89966	2.59707e-17	3.42345e-13	TRUE	-0.501613	5.89963	0.000322233	1	FALSE	0.605988	5.89965	1.76119e-05	0.20023	FALSE	0.578487	5.89964	0.0123159	1	FALSE	0.360403	5.89967	0.0177735	1	FALSE	-0.42493	5.89951	0.0664918	1	FALSE
1	2345737	2346643	PEX10	ENSG00000157911	-500	2339969	2345236	-	768	33	FALSE	0.250554	5.1143	0.129204	1	FALSE	-0.449084	5.11444	0.00126555	1	FALSE	-0.0369547	5.11435	0.924899	1	FALSE	0.183606	5.1144	0.192815	1	FALSE	0.624898	5.11438	0.00278302	1	FALSE	-0.054178	5.11446	0.754048	1	FALSE	-0.214761	5.11394	0.356467	1	FALSE
1	2471580	2476358	RP3-395M20.12	ENSG00000272449	-1545	2477904	2478899	+	768	497	TRUE	-0.216979	9.06934	0.229206	1	FALSE	-0.779059	9.06935	1.49995e-08	0.000181975	TRUE	0.980138	9.06935	5.26347e-17	6.99883e-13	TRUE	0.247766	9.06935	0.0787959	1	FALSE	0.553677	9.06935	0.0143274	1	FALSE	-1.17001	9.06936	2.69471e-13	3.38483e-09	TRUE	-0.388437	9.06932	0.0608942	1	FALSE
1	2507605	2510681	RP3-395M20.9	ENSG00000228037	-2317	2512999	2515972	+	768	632	TRUE	-0.31892	9.05213	0.00351418	1	FALSE	0.498212	9.05213	5.15581e-11	6.52468e-07	FALSE	-0.381516	9.05213	1.5135e-06	0.0181725	FALSE	-0.101589	9.05213	0.262684	1	FALSE	-0.29393	9.05213	0.0580587	1	FALSE	0.111109	9.05213	0.221996	1	FALSE	0.146595	9.05213	0.207952	1	FALSE
1	3369369	3370489	ARHGEF16	ENSG00000130762	-500	3370990	3397677	+	768	6	FALSE	0.207318	4.24108	0.542169	1	FALSE	-0.23378	4.24111	0.325937	1	FALSE	-0.321535	4.24109	0.306255	1	FALSE	-0.430258	4.2411	0.0893644	1	FALSE	-1.17687	4.2411	0.00977815	1	FALSE	0.540852	4.24111	0.0295768	1	FALSE	0.866053	4.241	0.00739168	1	FALSE
1	3713569	3713666	LRRC47	ENSG00000130764	-500	3696784	3713068	-	768	71	TRUE	1.15319	4.49482	2.17783e-06	0.0260903	FALSE	-1.34032	4.49503	4.48187e-08	0.00053778	TRUE	-0.489469	4.49489	0.0457904	1	FALSE	0.279545	4.49496	0.224964	1	FALSE	1.67274	4.49494	2.82402e-08	0.000357831	TRUE	-0.907649	4.49506	0.00148747	1	FALSE	-0.428125	4.4943	0.273369	1	FALSE
1	3721025	3721515	CEP104	ENSG00000116198	7129	3728645	3773763	-	768	2	FALSE	0.201017	4.13402	0.565515	1	FALSE	-0.058671	4.13402	0.898536	1	FALSE	-0.0994874	4.13402	0.762942	1	FALSE	0.146866	4.13402	0.312859	1	FALSE	-0.275501	4.13402	0.78292	1	FALSE	-0.0773335	4.13402	0.924599	1	FALSE	0.0842406	4.13403	1	1	FALSE
1	4086773	4088485	RP13-614K11.1	ENSG00000233304	71450	4000677	4015322	+	768	13	FALSE	0.41584	4.77088	0.295308	1	FALSE	-0.63486	4.77089	0.0753186	1	FALSE	-0.953616	4.77089	0.00693298	1	FALSE	1.45887	4.77089	1.36097e-05	0.155314	FALSE	-1.65737	4.77089	0.0243174	1	FALSE	-0.26726	4.77089	0.535472	1	FALSE	0.0825525	4.77087	0.810558	1	FALSE
1	4659466	4667145	RP1-37J18.2	ENSG00000232596	15984	4631608	4643481	+	768	208	TRUE	-0.276016	8.30167	0.365199	1	FALSE	0.234175	8.30167	0.256754	1	FALSE	1.15256	8.30167	1.73355e-09	2.20664e-05	TRUE	-0.443686	8.30167	0.07815	1	FALSE	-1.84642	8.30167	0.000137537	1	FALSE	-1.71178	8.30167	5.04334e-10	6.14732e-06	TRUE	-0.0980858	8.30165	0.810337	1	FALSE
1	4712170	4713419	AJAP1	ENSG00000196581	-1372	4714792	4837854	+	768	107	TRUE	0.751877	5.67411	0.00253107	1	FALSE	0.553614	5.67409	0.00505929	1	FALSE	0.282987	5.6741	0.142694	1	FALSE	-1.1878	5.6741	2.55643e-06	0.0300202	FALSE	-2.69569	5.6741	1.95936e-07	0.00245429	TRUE	-0.349852	5.67408	0.162318	1	FALSE	-0.284074	5.67418	0.382811	1	FALSE
1	4713925	4714291	AJAP1	ENSG00000196581	-500	4714792	4837854	+	768	152	TRUE	0.725781	5.24059	0.00290355	1	FALSE	0.593288	5.24058	0.00183294	1	FALSE	0.200159	5.24059	0.274121	1	FALSE	-1.26341	5.24058	1.73435e-07	0.00210203	TRUE	-2.04008	5.24058	9.45501e-06	0.114415	FALSE	-0.294805	5.24058	0.229813	1	FALSE	-0.198906	5.24061	0.552724	1	FALSE
1	4857595	4859078	AJAP1	ENSG00000196581	5000	4715105	4852594	+	768	376	TRUE	0.015913	6.90305	0.914101	1	FALSE	1.04477	6.90305	2.1676e-10	2.71882e-06	TRUE	-0.208774	6.90305	0.257617	1	FALSE	-0.670651	6.90305	0.00143928	1	FALSE	-2.66378	6.90305	5.5414e-10	7.13843e-06	TRUE	-0.208161	6.90305	0.328113	1	FALSE	-0.134946	6.90305	0.6365	1	FALSE
1	5003823	5004717	RP11-542C10.1	ENSG00000231510	141801	5146519	5150959	-	768	0	FALSE	0.48015	4.17151	0.0767508	1	FALSE	0.013938	4.17152	0.817511	1	FALSE	0.0995043	4.17152	0.811002	1	FALSE	-0.509387	4.17152	0.0683741	1	FALSE	-0.328678	4.17152	0.432118	1	FALSE	-0.262906	4.17152	0.446175	1	FALSE	0.423502	4.17148	0.17138	1	FALSE
1	8013732	8013850	PARK7	ENSG00000116288	-500	8014351	8045112	+	768	112	TRUE	1.35574	4.46013	5.5386e-11	7.15365e-07	TRUE	-0.723283	4.46027	0.00164554	1	FALSE	-0.397752	4.46018	0.0950917	1	FALSE	0.201373	4.46023	0.328386	1	FALSE	0.573869	4.46021	0.106786	1	FALSE	-0.652541	4.46029	0.00785468	1	FALSE	-0.507513	4.4598	0.133166	1	FALSE
1	8053878	8054475	PARK7	ENSG00000116288	8312	8021752	8045565	+	768	5	FALSE	0.15899	4.37439	0.517565	1	FALSE	-0.370834	4.3744	0.0727598	1	FALSE	-0.314182	4.37439	0.0703745	1	FALSE	0.622751	4.3744	2.29787e-05	0.259683	FALSE	0.295475	4.37439	0.334132	1	FALSE	-0.0105685	4.3744	0.786239	1	FALSE	-0.457337	4.37436	0.108809	1	FALSE
1	8241943	8243369	RP11-431K24.2	ENSG00000229305	-6514	8249884	8252830	+	768	4	FALSE	0.728819	4.41547	0.000264647	1	FALSE	-0.0902084	4.4155	0.490719	1	FALSE	-0.650903	4.41548	0.000245641	1	FALSE	0.0677339	4.41549	0.749009	1	FALSE	0.0921451	4.41549	0.644556	1	FALSE	0.301243	4.41551	0.0867184	1	FALSE	-0.46809	4.4154	0.180004	1	FALSE
1	8878203	8878836	RERE	ENSG00000142599	-500	8414686	8877702	-	768	26	FALSE	0.283185	4.5971	0.196614	1	FALSE	0.118366	4.59717	0.434117	1	FALSE	-0.844373	4.59713	3.61294e-07	0.00442296	FALSE	0.12583	4.59715	0.407484	1	FALSE	-0.0805172	4.59714	0.670495	1	FALSE	0.512963	4.59718	0.00179896	1	FALSE	-0.172167	4.59692	0.511674	1	FALSE
1	8889045	8890201	RP11-185B14.1	ENSG00000229716	-864	8891066	8891434	+	768	1	FALSE	0.211523	4.31994	0.391996	1	FALSE	0.129941	4.31994	0.617376	1	FALSE	-0.340561	4.31994	0.0985163	1	FALSE	-0.424981	4.31994	0.0411406	1	FALSE	0.0896846	4.31994	0.799481	1	FALSE	0.506941	4.31994	0.0124785	1	FALSE	-0.138145	4.31993	0.834893	1	FALSE
1	8959211	8960981	HMGN2P17	ENSG00000238249	5000	8953468	8954210	+	768	8	FALSE	0.913557	4.71919	0.000403046	1	FALSE	-1.3092	4.71922	1.58814e-08	0.000192594	FALSE	-0.481137	4.7192	0.0302795	1	FALSE	-0.822971	4.71921	0.00198803	1	FALSE	-0.913839	4.71921	0.0572232	1	FALSE	1.58631	4.71923	1.33492e-14	1.68921e-10	FALSE	-0.55069	4.7191	0.193441	1	FALSE
1	9189730	9190122	GPR157	ENSG00000180758	-500	9160364	9189229	-	768	3	FALSE	0.191767	4.1956	0.323867	1	FALSE	0.131076	4.1956	0.662824	1	FALSE	-0.294439	4.1956	0.174658	1	FALSE	-0.505023	4.1956	0.0352846	1	FALSE	-0.0310233	4.1956	1	1	FALSE	0.415297	4.1956	0.117676	1	FALSE	0.207004	4.19559	0.692665	1	FALSE
1	9205543	9205940	MIR34A	ENSG00000207865	5786	9211727	9211836	-	768	0	FALSE	0.0891123	4.12658	0.685056	1	FALSE	-0.101247	4.12658	0.574805	1	FALSE	-0.119496	4.12658	0.487668	1	FALSE	-0.0865384	4.12658	0.88944	1	FALSE	0.298595	4.12658	0.177006	1	FALSE	0.0438135	4.12658	1	1	FALSE	0.198781	4.12658	0.453146	1	FALSE
1	9222064	9225702	MIR34A	ENSG00000207865	-10227	9211727	9211836	-	768	47	TRUE	0.0841632	5.8565	0.636191	1	FALSE	-0.491848	5.85659	0.00297359	1	FALSE	-0.262036	5.85653	0.102324	1	FALSE	-1.17897	5.85656	2.35278e-09	2.9485e-05	TRUE	1.32102	5.85655	1.03848e-07	0.0013061	TRUE	0.781667	5.85661	3.39139e-06	0.037892	FALSE	0.13472	5.85627	0.543505	1	FALSE
1	9294108	9294333	H6PD	ENSG00000049239	-500	9294834	9331396	+	768	22	FALSE	-0.639394	4.27398	0.0122329	1	FALSE	-0.424148	4.27398	0.0590448	1	FALSE	-0.575666	4.27398	0.00668477	1	FALSE	-0.545766	4.27398	0.0193552	1	FALSE	-0.364609	4.27398	0.408793	1	FALSE	0.995887	4.27398	1.49009e-06	0.0168469	FALSE	1.31381	4.27397	6.78584e-07	0.00902856	FALSE
1	9336397	9336416	Z98044.1	ENSG00000252841	-2033	9338450	9338592	+	768	81	TRUE	-0.826315	4.21524	0.00898283	1	FALSE	0.023483	4.21524	0.96661	1	FALSE	-0.0696529	4.21524	0.597084	1	FALSE	1.03244	4.21524	3.80736e-08	0.000467658	TRUE	0.0954441	4.21524	0.812722	1	FALSE	-0.668532	4.21524	0.00302943	1	FALSE	-0.648451	4.21523	0.0718253	1	FALSE
1	9350153	9350772	SPSB1	ENSG00000171621	-2166	9352939	9429591	+	768	1	FALSE	0.428176	4.14943	0.0672835	1	FALSE	-0.387939	4.14944	0.0883057	1	FALSE	-0.178939	4.14944	0.561471	1	FALSE	-0.349859	4.14944	0.123723	1	FALSE	0.732284	4.14944	0.0696518	1	FALSE	0.142439	4.14944	0.574623	1	FALSE	0.221821	4.14941	0.342228	1	FALSE
1	9352155	9352438	SPSB1	ENSG00000171621	-500	9352939	9429591	+	768	8	FALSE	0.373451	4.16852	0.182233	1	FALSE	-0.189093	4.16854	0.527572	1	FALSE	0.0276416	4.16852	0.994526	1	FALSE	-0.498308	4.16853	0.0439339	1	FALSE	0.925855	4.16853	0.00289567	1	FALSE	-0.14213	4.16854	0.784225	1	FALSE	-0.11232	4.16847	1	1	FALSE
1	9472854	9474140	RNA5SP40	ENSG00000252956	23587	9497728	9497837	-	768	0	FALSE	-0.313035	4.25887	0.313001	1	FALSE	0.314789	4.2589	0.172091	1	FALSE	-0.0329439	4.25888	0.998209	1	FALSE	-0.393382	4.25889	0.154771	1	FALSE	0.553293	4.25888	0.137878	1	FALSE	-0.453033	4.2589	0.156718	1	FALSE	0.542038	4.25879	0.0820373	1	FALSE
1	9485321	9487335	RNA5SP40	ENSG00000252956	10392	9497728	9497837	-	768	81	TRUE	0.50227	5.62053	0.00759238	1	FALSE	-0.172324	5.62052	0.27378	1	FALSE	0.676523	5.62053	1.69413e-06	0.0203075	FALSE	-0.635144	5.62053	0.000378557	1	FALSE	0.0937222	5.62053	0.755959	1	FALSE	-1.48253	5.62052	1.04992e-13	1.32238e-09	TRUE	0.473831	5.62056	0.0261509	1	FALSE
1	9488084	9489998	RNA5SP40	ENSG00000252956	7729	9497728	9497837	-	768	123	TRUE	0.793075	5.74395	1.52967e-05	0.177962	FALSE	-0.452857	5.74403	0.00445126	1	FALSE	0.484013	5.74398	0.000641651	1	FALSE	-1.01577	5.74401	2.25861e-08	0.00027878	TRUE	0.37978	5.744	0.163235	1	FALSE	-0.44447	5.74404	0.0181312	1	FALSE	0.233473	5.74376	0.272444	1	FALSE
1	9597942	9599040	SLC25A33	ENSG00000171612	-500	9599541	9645237	+	768	1	FALSE	0.207948	4.358	0.594654	1	FALSE	-0.170503	4.35805	0.864082	1	FALSE	-0.116831	4.35801	0.609632	1	FALSE	0.190141	4.35803	0.279895	1	FALSE	0.574189	4.35803	0.072004	1	FALSE	-0.179063	4.35806	0.272044	1	FALSE	-0.345404	4.35787	0.277644	1	FALSE
1	9885234	9886333	CLSTN1	ENSG00000171603	-649	9789086	9884584	-	768	10	FALSE	-0.205722	4.8069	0.362027	1	FALSE	-0.739956	4.8069	2.08649e-05	0.22772	FALSE	-0.328891	4.8069	0.0611609	1	FALSE	-0.04224	4.8069	0.781438	1	FALSE	-0.759516	4.8069	0.0541323	1	FALSE	1.33368	4.8069	2.59872e-17	3.3378e-13	FALSE	-0.207146	4.80688	0.40858	1	FALSE
1	9970895	9971751	CTNNBIP1	ENSG00000178585	-500	9910167	9970394	-	768	44	TRUE	0.355742	5.10921	0.0199724	1	FALSE	-0.7967	5.10935	3.4867e-08	0.000419554	TRUE	-0.238325	5.10926	0.115476	1	FALSE	0.654728	5.1093	3.96529e-07	0.00476073	FALSE	0.523334	5.10929	0.0192823	1	FALSE	-0.275838	5.10936	0.0509443	1	FALSE	0.0538149	5.10887	0.810156	1	FALSE
1	10092365	10092389	UBE4B	ENSG00000130939	-500	10092890	10240425	+	768	287	TRUE	-0.541104	4.6527	0.0362758	1	FALSE	-0.504967	4.65271	0.000614706	1	FALSE	-0.455735	4.65271	0.00425688	1	FALSE	-0.203245	4.65271	0.252248	1	FALSE	0.151398	4.65271	0.592478	1	FALSE	1.33603	4.65271	2.26657e-21	2.95492e-17	TRUE	-0.177771	4.65269	0.478085	1	FALSE
1	10249405	10250178	UBE4B	ENSG00000130939	8107	10093654	10241297	+	768	12	FALSE	-0.00904727	4.67772	0.905249	1	FALSE	0.222376	4.67772	0.0984992	1	FALSE	0.00483821	4.67772	0.969119	1	FALSE	-0.130094	4.67772	0.478899	1	FALSE	-0.287375	4.67772	0.412576	1	FALSE	-0.0372052	4.67772	0.744546	1	FALSE	-0.0195271	4.67771	0.627885	1	FALSE
1	10269413	10270362	KIF1B	ENSG00000054523	-500	10270863	10368655	+	768	6	FALSE	0.834676	4.36387	0.00028966	1	FALSE	-0.504527	4.36388	0.0156173	1	FALSE	-0.138604	4.36387	0.639387	1	FALSE	-1.03982	4.36388	3.698e-06	0.0431446	FALSE	0.321268	4.36387	0.330017	1	FALSE	-0.278098	4.36388	0.149388	1	FALSE	1.20231	4.36384	5.58787e-07	0.00743968	FALSE
1	10447528	10448663	RN7SL721P	ENSG00000265945	-1395	10450059	10450353	+	768	263	TRUE	-0.037993	6.44575	0.806613	1	FALSE	0.310941	6.44574	0.00275329	1	FALSE	-0.171393	6.44574	0.0999393	1	FALSE	-1.1247	6.44574	3.54027e-20	4.70679e-16	TRUE	-0.132491	6.44574	0.609666	1	FALSE	0.645501	6.44574	7.74357e-09	9.27448e-05	FALSE	0.0827395	6.44576	0.591489	1	FALSE
1	10458063	10458148	PGD	ENSG00000142657	-500	10458649	10471609	+	768	98	TRUE	-0.67978	4.45415	0.00669318	1	FALSE	-0.30737	4.45415	0.0837853	1	FALSE	-0.349984	4.45415	0.0311002	1	FALSE	0.701847	4.45415	2.08127e-05	0.235621	FALSE	-0.0681445	4.45415	0.99087	1	FALSE	0.0938131	4.45415	0.628952	1	FALSE	0.468571	4.45416	0.0362886	1	FALSE
1	10998591	11001527	C1orf127	ENSG00000175262	5000	11006528	11009808	-	768	74	TRUE	0.54119	5.8892	0.0115305	1	FALSE	-1.01333	5.88922	1.00166e-07	0.00119217	TRUE	0.690789	5.8892	1.80114e-05	0.207906	FALSE	0.243832	5.88921	0.190618	1	FALSE	-0.331647	5.88921	0.32553	1	FALSE	-0.614094	5.88922	0.00323551	1	FALSE	-0.216318	5.88914	0.464661	1	FALSE
1	11071779	11071913	TARDBP	ENSG00000120948	-500	11072414	11080546	+	768	369	TRUE	-0.13291	5.07188	0.312002	1	FALSE	0.255336	5.07191	0.0326218	1	FALSE	-0.327081	5.07189	0.00352167	1	FALSE	-0.381028	5.0719	0.00274451	1	FALSE	-0.0908392	5.0719	0.886365	1	FALSE	0.760226	5.07192	7.10169e-12	8.81603e-08	TRUE	-0.602185	5.0718	0.000885307	1	FALSE
1	11120582	11121185	SRM	ENSG00000116649	-500	11114646	11120081	-	768	686	TRUE	0.127138	7.41131	0.256054	1	FALSE	-0.325538	7.41137	0.000285379	1	FALSE	0.318645	7.41133	4.12363e-05	0.467991	FALSE	0.340455	7.41135	0.000163825	1	FALSE	0.554741	7.41134	0.0001585	1	FALSE	-1.0224	7.41138	1.21982e-25	1.60358e-21	TRUE	-0.0389428	7.41115	0.747134	1	FALSE
1	11323065	11323238	MTOR	ENSG00000198793	-500	11166592	11322564	-	768	110	TRUE	1.20952	4.54481	4.48187e-12	5.83137e-08	TRUE	-0.656618	4.54494	0.00124897	1	FALSE	0.198013	4.54485	0.116334	1	FALSE	-0.290043	4.5449	0.0860245	1	FALSE	0.70742	4.54488	0.0106716	1	FALSE	-0.930186	4.54495	1.2366e-05	0.135606	FALSE	-0.483214	4.5445	0.0581341	1	FALSE
1	11394788	11395724	UBIAD1	ENSG00000120942	38681	11333991	11356106	+	768	1	FALSE	0.00475261	4.18545	1	1	FALSE	-0.401485	4.18547	0.0938379	1	FALSE	-0.358352	4.18546	0.147275	1	FALSE	-0.150466	4.18547	0.787892	1	FALSE	2.08446	4.18546	1.56649e-12	2.04395e-08	FALSE	-0.533931	4.18548	0.0520465	1	FALSE	-0.200551	4.18538	0.691784	1	FALSE
1	11790915	11792551	AGTRAP	ENSG00000177674	-3589	11796141	11810767	+	768	0	FALSE	-0.0785648	4.28189	0.79868	1	FALSE	-0.109639	4.28189	0.748217	1	FALSE	0.0907911	4.28189	0.841759	1	FALSE	-0.488771	4.28189	0.0566262	1	FALSE	-0.311189	4.28189	0.498866	1	FALSE	0.547806	4.28189	0.0100912	1	FALSE	0.0735431	4.28188	0.882159	1	FALSE
1	11986986	11987062	KIAA2013	ENSG00000116685	-500	11982232	11986485	-	768	82	TRUE	0.401114	4.33764	0.117285	1	FALSE	-0.651882	4.33765	0.00219114	1	FALSE	-0.297743	4.33764	0.121254	1	FALSE	-0.381634	4.33765	0.0841954	1	FALSE	0.240461	4.33765	0.635822	1	FALSE	0.923304	4.33766	8.03202e-07	0.00915891	TRUE	-0.177747	4.33759	0.595756	1	FALSE
1	12078769	12079022	MIIP	ENSG00000116691	-500	12079523	12089912	+	768	38	FALSE	0.2398	4.44689	0.447856	1	FALSE	-0.232158	4.4469	0.165384	1	FALSE	-0.387357	4.4469	0.0640106	1	FALSE	0.0725716	4.4469	0.837178	1	FALSE	0.236542	4.4469	0.622689	1	FALSE	0.163949	4.44691	0.362758	1	FALSE	0.336597	4.44686	0.0678451	1	FALSE
1	12100165	12100981	RN7SL649P	ENSG00000243539	-3093	12096799	12097071	-	768	1	FALSE	-0.337889	4.22673	0.3948	1	FALSE	-0.0390797	4.22674	0.712521	1	FALSE	-0.199437	4.22673	0.568472	1	FALSE	0.300952	4.22673	0.139949	1	FALSE	-0.186892	4.22673	0.953802	1	FALSE	0.363058	4.22674	0.201856	1	FALSE	-0.188482	4.2267	0.547758	1	FALSE
1	12107268	12107978	RN7SL649P	ENSG00000243539	-10196	12096799	12097071	-	768	2	FALSE	-0.0974312	4.19882	0.891844	1	FALSE	-0.337692	4.19882	0.136716	1	FALSE	-0.6808	4.19882	0.00343953	1	FALSE	0.42995	4.19882	0.0634115	1	FALSE	1.39743	4.19882	0.00010192	1	FALSE	0.279202	4.19882	0.35082	1	FALSE	-0.810415	4.1988	0.0294577	1	FALSE
1	12112058	12112885	TNFRSF8	ENSG00000120949	-10548	12123434	12204264	+	768	1	FALSE	0.294437	4.16177	0.316278	1	FALSE	-0.284764	4.16179	0.256507	1	FALSE	-0.449329	4.16178	0.031478	1	FALSE	0.0563086	4.16179	0.767089	1	FALSE	1.42213	4.16178	4.00434e-06	0.0489331	FALSE	-0.0215711	4.1618	1	1	FALSE	-0.686151	4.16173	0.0537578	1	FALSE
1	12221435	12222760	TNFRSF1B	ENSG00000028137	-4299	12227060	12252415	+	768	4	FALSE	-0.409391	4.17884	0.235594	1	FALSE	-0.461801	4.17885	0.0623919	1	FALSE	-0.734885	4.17885	0.00130884	1	FALSE	-0.463942	4.17885	0.0797834	1	FALSE	2.06544	4.17885	8.69394e-11	1.12508e-06	FALSE	-0.0901072	4.17885	0.983531	1	FALSE	0.881911	4.17882	0.0143605	1	FALSE
1	14025863	14026192	PRDM2	ENSG00000116731	-500	14026693	14075958	+	768	699	TRUE	0.342932	7.22218	0.000687174	1	FALSE	-0.160331	7.2222	0.0599335	1	FALSE	-0.329844	7.22219	5.98821e-05	0.674692	FALSE	0.471584	7.22219	4.52357e-08	0.000554816	FALSE	0.229487	7.22219	0.114805	1	FALSE	-0.3185	7.2222	0.000494026	1	FALSE	-0.0232474	7.22212	0.888823	1	FALSE
1	14336803	14338801	RNU6-1265P	ENSG00000252151	111926	14450728	14450830	-	768	15	FALSE	-0.581159	4.9859	0.0268125	1	FALSE	0.180889	4.98599	0.316052	1	FALSE	0.364266	4.98593	0.0217698	1	FALSE	-1.23028	4.98596	1.55836e-08	0.000192848	FALSE	0.293965	4.98595	0.322665	1	FALSE	0.507845	4.986	0.00907937	1	FALSE	-0.277878	4.98568	0.317634	1	FALSE
1	14366043	14367244	RNU6-1265P	ENSG00000252151	83483	14450728	14450830	-	768	0	FALSE	-0.0953164	4.2605	0.644567	1	FALSE	0.0867367	4.26052	0.762708	1	FALSE	-0.0648529	4.2605	1	1	FALSE	-0.466252	4.26051	0.0424209	1	FALSE	0.0715246	4.26051	0.707764	1	FALSE	0.577826	4.26052	0.00851675	1	FALSE	-0.300822	4.26044	0.420406	1	FALSE
1	15557529	15559062	TMEM51	ENSG00000171729	10552	15480285	15546976	+	768	0	FALSE	-1.09795	4.5283	1.59702e-05	0.185605	FALSE	0.917316	4.5283	5.32699e-09	6.52769e-05	FALSE	-0.230838	4.5283	0.199043	1	FALSE	-0.360937	4.5283	0.0664624	1	FALSE	-0.735333	4.5283	0.0719934	1	FALSE	0.363427	4.5283	0.0858099	1	FALSE	-0.433727	4.52831	0.109227	1	FALSE
1	15782037	15782722	CELA2A	ENSG00000142615	-500	15783223	15789506	+	768	2	FALSE	0.242171	4.42231	0.140715	1	FALSE	-0.0255329	4.4223	0.652711	1	FALSE	-0.159556	4.42231	0.449226	1	FALSE	-0.00307915	4.42231	0.706011	1	FALSE	-0.162242	4.42231	0.458386	1	FALSE	0.332636	4.4223	0.0794949	1	FALSE	-0.474304	4.42235	0.0380152	1	FALSE
1	15942975	15943494	DDI2	ENSG00000197312	-500	15943995	15995539	+	768	29	FALSE	0.3689	4.51609	0.0799362	1	FALSE	-0.829006	4.51615	1.09121e-06	0.0125697	FALSE	-0.539048	4.51611	0.00368548	1	FALSE	0.032866	4.51613	0.794923	1	FALSE	1.21967	4.51612	1.15105e-07	0.00144675	FALSE	0.586563	4.51616	0.000517723	1	FALSE	-0.522772	4.51595	0.0776157	1	FALSE
1	16010124	16010326	PLEKHM2	ENSG00000116786	-500	16010827	16061264	+	768	382	TRUE	-0.33086	5.88808	0.0723265	1	FALSE	-1.24313	5.8881	2.24317e-15	2.92981e-11	TRUE	-1.2121	5.88809	4.28837e-16	5.68681e-12	TRUE	-0.718811	5.88809	1.57907e-05	0.179793	FALSE	0.244658	5.88809	0.359761	1	FALSE	2.13633	5.88811	2.37351e-76	3.18763e-72	TRUE	0.0851114	5.88802	0.655302	1	FALSE
1	16149757	16150757	RP11-169K16.8	ENSG00000178715	-3966	16154724	16155167	+	768	29	FALSE	0.039239	4.95703	0.93696	1	FALSE	0.0712424	4.95707	0.601535	1	FALSE	0.332556	4.95704	0.00257289	1	FALSE	-0.139156	4.95706	0.406259	1	FALSE	0.173891	4.95705	0.351687	1	FALSE	-0.451255	4.95707	0.00317294	1	FALSE	-0.257091	4.95695	0.132315	1	FALSE
1	16303128	16303271	ZBTB17	ENSG00000116809	-500	16268366	16302627	-	768	9	FALSE	-0.144181	4.16634	1	1	FALSE	0.311654	4.16635	0.131148	1	FALSE	-0.396414	4.16634	0.0793327	1	FALSE	-0.135656	4.16634	0.52727	1	FALSE	-0.217612	4.16634	1	1	FALSE	0.487374	4.16635	0.0449787	1	FALSE	-0.204407	4.16633	0.792671	1	FALSE
1	16400628	16401061	FAM131C	ENSG00000185519	-500	16384774	16400127	-	768	1	FALSE	0.786912	4.14145	0.00081089	1	FALSE	-0.311228	4.14145	0.112343	1	FALSE	-0.263495	4.14145	0.24992	1	FALSE	-0.178219	4.14145	0.683916	1	FALSE	0.0460329	4.14145	0.799566	1	FALSE	0.223294	4.14145	0.405325	1	FALSE	-0.225066	4.14144	0.725788	1	FALSE
1	16405374	16406228	FAM131C	ENSG00000185519	-5246	16384774	16400127	-	768	0	FALSE	0.452596	4.16844	0.0796337	1	FALSE	-0.335342	4.16844	0.131142	1	FALSE	-0.680211	4.16844	0.00069612	1	FALSE	-0.308953	4.16844	0.285434	1	FALSE	-0.224322	4.16844	0.992125	1	FALSE	0.900605	4.16845	8.45513e-05	0.890325	FALSE	0.175847	4.16844	0.58255	1	FALSE
1	16766352	16766666	NECAP2	ENSG00000157191	-500	16767167	16786573	+	768	47	TRUE	0.0309406	4.33372	1	1	FALSE	-0.250222	4.33373	0.101502	1	FALSE	-0.25919	4.33372	0.198294	1	FALSE	-0.0241464	4.33373	0.837669	1	FALSE	0.657251	4.33373	0.0192007	1	FALSE	0.326017	4.33374	0.080216	1	FALSE	-0.0811969	4.33369	0.96191	1	FALSE
1	16826253	16826528	CROCCP3	ENSG00000080947	-500	16817141	16825752	-	768	10	FALSE	0.760068	4.27118	0.00226013	1	FALSE	-1.05671	4.2712	4.91505e-07	0.00573292	FALSE	-0.599104	4.27119	0.0116926	1	FALSE	0.498825	4.27119	0.0184316	1	FALSE	0.111969	4.27119	0.877153	1	FALSE	0.46148	4.2712	0.00745121	1	FALSE	-0.289011	4.27114	0.457549	1	FALSE
1	16983095	16984355	MST1P2	ENSG00000186301	6180	16972069	16976914	+	768	192	TRUE	-0.162594	6.43154	0.576408	1	FALSE	0.233957	6.43156	0.231992	1	FALSE	0.964671	6.43154	9.41247e-08	0.0011663	TRUE	-1.91863	6.43155	2.75303e-14	3.59876e-10	TRUE	-0.508483	6.43155	0.222743	1	FALSE	-0.586681	6.43156	0.0151525	1	FALSE	0.328732	6.43148	0.232002	1	FALSE
1	16993944	16994652	RNU1-3	ENSG00000207513	-500	16993280	16993443	-	768	711	TRUE	1.1518	8.06492	1.48343e-18	1.97237e-14	TRUE	-0.363386	8.06496	0.00227622	1	FALSE	0.368682	8.06493	0.000687255	1	FALSE	-0.353954	8.06494	0.0075054	1	FALSE	-0.376502	8.06494	0.0944948	1	FALSE	-0.870766	8.06496	3.65992e-10	4.47169e-06	TRUE	-0.192387	8.06484	0.297042	1	FALSE
1	17066010	17066267	CROCC	ENSG00000058453	-500	17066768	17267929	+	768	312	TRUE	1.02149	5.60147	1.32094e-10	1.70031e-06	TRUE	-0.320658	5.60156	0.0268888	1	FALSE	0.326512	5.60151	0.0119188	1	FALSE	-0.357432	5.60153	0.0280549	1	FALSE	-0.206779	5.60152	0.444379	1	FALSE	-0.853994	5.60158	1.2866e-06	0.0145726	FALSE	-0.0207603	5.60125	0.998873	1	FALSE
1	17766721	17769215	RCC2	ENSG00000179051	-500	17733256	17766220	-	768	361	TRUE	0.558137	8.14804	0.0126093	1	FALSE	-3.10091	8.14806	4.56709e-50	6.14228e-46	TRUE	0.586994	8.14805	0.000552933	1	FALSE	1.43041	8.14805	5.75047e-16	7.56531e-12	TRUE	-0.187554	8.14805	0.639344	1	FALSE	-1.16298	8.14806	3.03568e-07	0.00350227	TRUE	-0.975358	8.14799	0.00129914	1	FALSE
1	17862602	17863494	ARHGEF10L	ENSG00000074964	-2835	17866330	18017649	+	768	0	FALSE	0.510077	4.14729	0.0188029	1	FALSE	-0.179858	4.14729	0.626543	1	FALSE	-0.259349	4.14729	0.253654	1	FALSE	-0.238347	4.14729	0.457208	1	FALSE	-0.0589639	4.14729	1	1	FALSE	0.540208	4.14729	0.0189569	1	FALSE	-0.477263	4.14728	0.152373	1	FALSE
1	19283681	19283978	IFFO2	ENSG00000169991	-500	19230775	19283180	-	768	165	TRUE	0.584022	4.82847	0.00192637	1	FALSE	-0.128036	4.82848	0.376438	1	FALSE	-0.829568	4.82848	6.32374e-07	0.00768018	TRUE	0.23358	4.82848	0.159486	1	FALSE	-0.0940792	4.82848	0.868181	1	FALSE	0.470813	4.82849	0.00659542	1	FALSE	-0.292162	4.82845	0.274574	1	FALSE
1	19812567	19813443	CAPZB	ENSG00000077549	-500	19665267	19812066	-	768	63	TRUE	0.378047	5.33322	0.00534454	1	FALSE	-0.492755	5.33336	3.65782e-05	0.393509	FALSE	-0.0706093	5.33327	0.697908	1	FALSE	0.165901	5.33331	0.191412	1	FALSE	0.787108	5.3333	8.08135e-06	0.0979944	FALSE	-0.277962	5.33338	0.0439075	1	FALSE	-0.0418121	5.33287	0.908407	1	FALSE
1	20126939	20127939	TMCO4	ENSG00000162542	-500	20073656	20126438	-	768	18	FALSE	0.334927	4.73706	0.0918843	1	FALSE	0.146292	4.73715	0.259896	1	FALSE	-0.267858	4.73709	0.135723	1	FALSE	-0.0233843	4.73712	0.890834	1	FALSE	0.164598	4.73711	0.444651	1	FALSE	-0.241123	4.73716	0.122803	1	FALSE	0.0763235	4.73683	0.90602	1	FALSE
1	20835155	20835235	MUL1	ENSG00000090432	-500	20825943	20834654	-	768	39	TRUE	0.124573	4.23715	0.574809	1	FALSE	-0.473023	4.23716	0.0282178	1	FALSE	-0.227309	4.23715	0.224237	1	FALSE	-0.193663	4.23716	0.398843	1	FALSE	0.0775496	4.23715	1	1	FALSE	0.671622	4.23716	0.000718986	1	FALSE	0.219636	4.23711	0.647774	1	FALSE
1	21114317	21114956	HP1BP3	ENSG00000127483	-500	21103191	21113816	-	768	30	FALSE	0.394327	4.97093	0.0253925	1	FALSE	-0.240919	4.97108	0.124342	1	FALSE	-0.583491	4.97099	2.67939e-05	0.306636	FALSE	-0.168	4.97103	0.259343	1	FALSE	0.212283	4.97102	0.426597	1	FALSE	0.70015	4.9711	3.55362e-07	0.00409022	FALSE	-0.151979	4.97059	0.529956	1	FALSE
1	21503878	21504126	EIF4G3	ENSG00000075151	-500	21276499	21503377	-	768	28	FALSE	0.177133	4.72874	0.473144	1	FALSE	-0.230026	4.72884	0.150934	1	FALSE	-0.126348	4.72877	0.592226	1	FALSE	-0.142258	4.72881	0.196504	1	FALSE	0.63244	4.7288	0.0034171	1	FALSE	-0.0202679	4.72886	1	1	FALSE	0.24731	4.72848	0.189268	1	FALSE
1	21672498	21673217	ECE1	ENSG00000117298	-500	21543740	21671997	-	768	68	TRUE	0.398459	4.90676	0.0407505	1	FALSE	0.0625466	4.90684	0.705809	1	FALSE	0.357295	4.90679	0.0114997	1	FALSE	-1.31264	4.90681	7.46486e-12	9.61175e-08	TRUE	0.152089	4.9068	0.597657	1	FALSE	0.120391	4.90685	0.507666	1	FALSE	-0.238775	4.90655	0.387175	1	FALSE
1	21711137	21712131	PPP1R11P1	ENSG00000236216	-12348	21724480	21724833	+	768	1	FALSE	0.411791	4.22226	0.148354	1	FALSE	-0.485584	4.22231	0.0500806	1	FALSE	-0.130226	4.22228	0.75662	1	FALSE	-0.614486	4.22229	0.032191	1	FALSE	1.99776	4.22229	2.1095e-12	2.75079e-08	FALSE	-0.478868	4.22232	0.101186	1	FALSE	-0.477224	4.22214	0.325793	1	FALSE
1	22110600	22110919	USP48	ENSG00000090686	-500	22054344	22110099	-	768	292	TRUE	0.306161	5.32639	0.0389649	1	FALSE	-0.325644	5.32644	0.006847	1	FALSE	-0.341432	5.32641	0.00598454	1	FALSE	0.0915622	5.32643	0.376737	1	FALSE	-0.604223	5.32642	0.0102414	1	FALSE	0.632688	5.32645	1.11421e-06	0.0126529	FALSE	-0.0954891	5.32628	0.587327	1	FALSE
1	22116216	22120243	USP48	ENSG00000090686	-6116	22054344	22110099	-	768	19	FALSE	0.578833	5.72408	8.97919e-06	0.105389	FALSE	-0.304777	5.72415	0.00946839	1	FALSE	-0.28036	5.7241	0.0148698	1	FALSE	-0.135366	5.72412	0.209122	1	FALSE	0.385165	5.72412	0.0495997	1	FALSE	0.141474	5.72416	0.209417	1	FALSE	0.0596993	5.7239	0.752192	1	FALSE
1	22123860	22125397	LDLRAD2	ENSG00000187942	-13360	22138758	22151714	+	768	0	FALSE	0.293408	4.28049	0.300782	1	FALSE	-0.276059	4.28049	0.193145	1	FALSE	-0.323854	4.28049	0.156608	1	FALSE	-0.0438006	4.28049	0.977916	1	FALSE	-0.0667033	4.28049	1	1	FALSE	0.43504	4.28049	0.0620948	1	FALSE	0.16224	4.28049	0.508688	1	FALSE
1	22130972	22131661	LDLRAD2	ENSG00000187942	-7096	22138758	22151714	+	768	0	FALSE	0.125792	4.13675	0.875801	1	FALSE	0.098603	4.13675	0.554713	1	FALSE	-0.105298	4.13675	0.818915	1	FALSE	0.0717132	4.13675	0.906826	1	FALSE	-0.339585	4.13675	0.670146	1	FALSE	-0.0462044	4.13675	1	1	FALSE	0.0182592	4.13674	1	1	FALSE
1	22264291	22264602	HSPG2	ENSG00000142798	-500	22148738	22263790	-	768	7	FALSE	0.666188	4.18226	0.0120446	1	FALSE	-0.306849	4.1823	0.457827	1	FALSE	-0.0899699	4.18228	0.860383	1	FALSE	-0.302451	4.18229	0.20684	1	FALSE	0.937739	4.18228	0.00119941	1	FALSE	-0.106806	4.1823	0.689565	1	FALSE	-0.669095	4.18218	0.0429672	1	FALSE
1	22365692	22367573	LINC00339	ENSG00000218510	7975	22352027	22357716	+	768	44	TRUE	0.98137	5.65407	2.11007e-12	2.75322e-08	TRUE	-0.884611	5.65414	5.16103e-11	6.53077e-07	TRUE	0.00635014	5.6541	0.917375	1	FALSE	0.0217691	5.65412	0.829009	1	FALSE	0.606937	5.65411	0.00408732	1	FALSE	-0.358795	5.65415	0.0123737	1	FALSE	-0.0569062	5.65391	0.85004	1	FALSE
1	22374351	22375819	CDC42	ENSG00000070831	-3300	22379120	22419416	+	768	1	FALSE	0.339049	4.61374	0.0809228	1	FALSE	-0.444753	4.61379	0.0027714	1	FALSE	-0.485191	4.61376	0.00400634	1	FALSE	-0.412594	4.61377	0.0143222	1	FALSE	0.0126087	4.61377	0.920241	1	FALSE	1.11063	4.61379	1.28257e-15	1.63246e-11	FALSE	-0.350213	4.61363	0.15078	1	FALSE
1	22378531	22378619	CDC42	ENSG00000070831	-500	22379120	22419416	+	768	225	TRUE	0.0881574	4.68242	0.663449	1	FALSE	-0.0248192	4.68246	0.858055	1	FALSE	-0.703572	4.68244	4.86006e-06	0.0573585	FALSE	-0.420301	4.68245	0.0254936	1	FALSE	-0.565329	4.68244	0.0541449	1	FALSE	1.17298	4.68247	2.0541e-16	2.62638e-12	TRUE	-0.200843	4.68232	0.37095	1	FALSE
1	22501041	22504161	WNT4	ENSG00000162552	-30578	22453967	22470462	-	768	117	TRUE	-1.12336	6.79929	1.45146e-06	0.0174843	FALSE	0.780539	6.79928	1.86595e-07	0.00220313	TRUE	-0.19508	6.79929	0.222857	1	FALSE	0.338009	6.79928	0.0455256	1	FALSE	0.283149	6.79928	0.294804	1	FALSE	-0.574483	6.79928	0.00269112	1	FALSE	-0.56372	6.79932	0.0263045	1	FALSE
1	22510887	22513055	WNT4	ENSG00000162552	-40424	22453967	22470462	-	768	5	FALSE	-1.24433	4.44805	0.000227322	1	FALSE	0.410377	4.44808	0.0724163	1	FALSE	-0.541057	4.44806	0.0153435	1	FALSE	0.296804	4.44807	0.177484	1	FALSE	-0.214323	4.44807	0.798192	1	FALSE	0.0296089	4.44808	0.92475	1	FALSE	0.692286	4.44799	0.0270347	1	FALSE
1	22744803	22747638	ZBTB40	ENSG00000184677	-30705	22778344	22857650	+	768	0	FALSE	0.438477	4.59972	0.0679299	1	FALSE	0.595152	4.59974	0.000357798	1	FALSE	0.402104	4.59973	0.0125545	1	FALSE	-1.1172	4.59973	1.90027e-07	0.00230028	FALSE	-0.73083	4.59973	0.0656787	1	FALSE	-0.694151	4.59974	0.00309592	1	FALSE	-0.220695	4.59968	0.402736	1	FALSE
1	22777717	22777843	ZBTB40	ENSG00000184677	-500	22778344	22857650	+	768	20	FALSE	-0.0710811	4.16181	0.816552	1	FALSE	0.0631578	4.16182	0.826976	1	FALSE	0.350162	4.16181	0.0284682	1	FALSE	-0.582976	4.16182	0.00531062	1	FALSE	0.0685606	4.16181	1	1	FALSE	-0.346882	4.16182	0.118131	1	FALSE	0.455296	4.16178	0.196934	1	FALSE
1	23671330	23671873	HNRNPR	ENSG00000125944	-500	23631181	23670829	-	768	65	TRUE	1.04166	4.8091	1.84538e-09	2.34567e-05	TRUE	-1.03668	4.80928	6.79893e-09	8.3083e-05	TRUE	-0.33449	4.80917	0.0638134	1	FALSE	0.194369	4.80922	0.247273	1	FALSE	0.562082	4.80921	0.0409869	1	FALSE	0.0409558	4.8093	0.777817	1	FALSE	-0.30673	4.80868	0.217443	1	FALSE
1	23865716	23866941	E2F2	ENSG00000007968	-8003	23832922	23857712	-	768	2	FALSE	0.111926	4.48702	0.639742	1	FALSE	-0.106904	4.48705	0.578416	1	FALSE	0.299855	4.48703	0.0597681	1	FALSE	-0.534217	4.48704	0.0144882	1	FALSE	-0.192837	4.48704	0.645174	1	FALSE	-0.188535	4.48706	0.272766	1	FALSE	0.531739	4.48693	0.0214855	1	FALSE
1	23902999	23904720	MDS2	ENSG00000197880	-3264	23907985	23967058	+	768	0	FALSE	0.369105	4.19009	0.25145	1	FALSE	-0.451438	4.19009	0.0711657	1	FALSE	-0.351421	4.19009	0.0682124	1	FALSE	0.0787779	4.19009	0.898481	1	FALSE	-0.27583	4.19009	0.550115	1	FALSE	0.437695	4.19009	0.0445157	1	FALSE	0.292488	4.19008	0.206162	1	FALSE
1	24307918	24307918	SRSF10	ENSG00000188529	-500	24292935	24307417	-	768	67	TRUE	-0.392741	4.21442	0.0847449	1	FALSE	-0.227324	4.21442	0.188758	1	FALSE	-0.476889	4.21442	0.0529746	1	FALSE	-0.0453522	4.21442	0.875731	1	FALSE	-0.16265	4.21442	0.87348	1	FALSE	1.11491	4.21442	2.10421e-08	0.000249749	TRUE	-0.249288	4.21444	0.861445	1	FALSE
1	24514950	24520508	IFNLR1	ENSG00000185436	-500	24485490	24514449	-	768	215	TRUE	0.581227	7.50327	9.46718e-05	1	FALSE	-1.36975	7.50331	2.74301e-27	3.67426e-23	TRUE	-0.73573	7.50328	1.25364e-09	1.59965e-05	TRUE	0.136882	7.5033	0.296471	1	FALSE	0.436011	7.50329	0.0393177	1	FALSE	1.01918	7.50331	6.89449e-17	8.83529e-13	TRUE	0.0712974	7.50318	0.67043	1	FALSE
1	24553293	24553906	AL590683.1	ENSG00000221032	-500	24554407	24554520	+	768	6	FALSE	-0.814458	4.20137	0.00178735	1	FALSE	-0.29881	4.20136	0.227902	1	FALSE	-0.124993	4.20137	0.642978	1	FALSE	0.527398	4.20137	0.0115838	1	FALSE	-0.791514	4.20137	0.0296949	1	FALSE	0.648128	4.20136	0.00566701	1	FALSE	-0.143775	4.20138	0.61288	1	FALSE
1	24562464	24563163	AL590683.1	ENSG00000221032	7943	24554407	24554520	+	768	2	FALSE	0.155357	4.17684	0.71337	1	FALSE	-0.672781	4.17684	0.00197048	1	FALSE	-0.292694	4.17684	0.196805	1	FALSE	0.797622	4.17684	0.000306074	1	FALSE	-0.141774	4.17684	0.847449	1	FALSE	0.288231	4.17684	0.223407	1	FALSE	-0.592311	4.17683	0.104436	1	FALSE
1	24807434	24808713	NIPAL3	ENSG00000001461	7967	24742293	24799466	+	768	4	FALSE	-0.21302	4.68238	0.467306	1	FALSE	0.319314	4.68238	0.0379849	1	FALSE	0.551036	4.68238	1.37141e-05	0.159221	FALSE	-0.0377226	4.68238	1	1	FALSE	-0.706297	4.68238	0.0179062	1	FALSE	-0.963261	4.68238	1.34019e-07	0.00156052	FALSE	-0.183345	4.68236	0.302406	1	FALSE
1	24828171	24828886	RCAN3	ENSG00000117602	-500	24829387	24863504	+	768	149	TRUE	0.859492	5.55544	8.68626e-07	0.0105121	FALSE	0.199674	5.55548	0.15812	1	FALSE	-0.592298	5.55545	7.48411e-05	0.838321	FALSE	-0.128229	5.55547	0.409869	1	FALSE	-1.83586	5.55546	9.66862e-08	0.0012168	TRUE	-0.00110124	5.55548	1	1	FALSE	0.295255	5.55535	0.156734	1	FALSE
1	25020231	25021571	SRRM1	ENSG00000133226	20472	24969503	24999758	+	768	1	FALSE	-0.127557	4.20672	0.714513	1	FALSE	0.0826646	4.20674	0.768038	1	FALSE	0.235095	4.20672	0.229663	1	FALSE	-0.329826	4.20673	0.270192	1	FALSE	-0.18569	4.20673	0.708054	1	FALSE	-0.144599	4.20674	0.555039	1	FALSE	0.29948	4.20668	0.328287	1	FALSE
1	25031147	25033023	SRRM1	ENSG00000133226	31388	24969503	24999758	+	768	4	FALSE	0.236833	4.47815	0.340352	1	FALSE	-0.579809	4.47824	0.00987504	1	FALSE	0.0854575	4.47818	0.60052	1	FALSE	0.487296	4.47821	0.0136741	1	FALSE	0.385037	4.4782	0.259198	1	FALSE	-0.321522	4.47826	0.163281	1	FALSE	-0.34882	4.47793	0.381815	1	FALSE
1	25048913	25049546	CLIC4	ENSG00000169504	-22301	25071848	25170815	+	768	2	FALSE	0.551941	4.20311	0.0485599	1	FALSE	0.232812	4.20311	0.270087	1	FALSE	-0.1067	4.20311	0.730611	1	FALSE	0.10197	4.20311	0.73379	1	FALSE	-0.499884	4.20311	0.412112	1	FALSE	-0.477297	4.20311	0.0954586	1	FALSE	-0.416331	4.20309	0.35379	1	FALSE
1	25053033	25054814	CLIC4	ENSG00000169504	-17033	25071848	25170815	+	768	1	FALSE	0.188482	4.44747	0.310582	1	FALSE	-0.0415683	4.44748	0.921648	1	FALSE	-0.401586	4.44747	0.0238853	1	FALSE	0.0791022	4.44747	0.674952	1	FALSE	-0.746173	4.44747	0.030695	1	FALSE	0.538049	4.44748	0.00420388	1	FALSE	-0.0639371	4.44744	0.814347	1	FALSE
1	25068812	25071347	CLIC4	ENSG00000169504	-500	25071848	25170815	+	768	381	TRUE	-0.28101	7.43005	0.032044	1	FALSE	0.798309	7.43006	8.25398e-21	1.09828e-16	TRUE	0.174535	7.43005	0.0527198	1	FALSE	-0.848931	7.43006	3.23416e-15	4.24354e-11	TRUE	-1.00409	7.43006	3.06089e-07	0.00382305	TRUE	-0.0645203	7.43006	0.555022	1	FALSE	-0.316134	7.43003	0.028306	1	FALSE
1	25344552	25346713	MIR4425	ENSG00000264371	-3280	25349994	25350077	+	768	0	FALSE	0.123201	4.30025	0.637456	1	FALSE	-0.634122	4.30029	0.00557522	1	FALSE	-0.74494	4.30026	0.00068763	1	FALSE	0.834149	4.30028	7.96911e-05	0.873494	FALSE	-0.683581	4.30027	0.117028	1	FALSE	0.60702	4.30029	0.00401807	1	FALSE	-0.144959	4.30016	0.645456	1	FALSE
1	25346776	25349493	MIR4425	ENSG00000264371	-500	25349994	25350077	+	768	17	FALSE	0.35873	5.01617	0.11625	1	FALSE	-1.07207	5.01631	1.36175e-07	0.00161422	FALSE	-0.78522	5.01622	5.29711e-05	0.598361	FALSE	0.754129	5.01626	5.67067e-05	0.627403	FALSE	-0.69721	5.01625	0.0706026	1	FALSE	0.697959	5.01633	0.000374124	1	FALSE	0.20656	5.01583	0.437476	1	FALSE
1	25355078	25362504	MIR4425	ENSG00000264371	5000	25349994	25350077	+	768	3	FALSE	-0.41361	4.89557	0.183895	1	FALSE	-1.42888	4.89562	7.96922e-09	9.72803e-05	FALSE	-0.343878	4.89559	0.109243	1	FALSE	0.420381	4.89561	0.0736429	1	FALSE	-1.13768	4.8956	0.0139673	1	FALSE	1.28803	4.89563	5.23604e-09	6.28639e-05	FALSE	0.293083	4.89542	0.341031	1	FALSE
1	25363903	25364305	RP4-799D16.1	ENSG00000233755	5892	25370198	25439610	-	768	2	FALSE	0.0215416	4.13461	1	1	FALSE	-0.362408	4.13462	0.0258465	1	FALSE	0.390613	4.13461	0.00840477	1	FALSE	0.0669841	4.13462	0.824236	1	FALSE	-0.310239	4.13461	0.768259	1	FALSE	-0.100387	4.13462	0.813399	1	FALSE	-0.0908854	4.13458	1	1	FALSE
1	25559494	25560174	SYF2	ENSG00000117614	-500	25556800	25558993	-	768	628	TRUE	0.0222962	7.36485	0.868088	1	FALSE	-0.333137	7.36493	0.000382262	1	FALSE	-0.346054	7.36488	0.000138031	1	FALSE	0.555849	7.3649	2.66176e-09	3.33226e-05	FALSE	-0.0833614	7.36489	0.593962	1	FALSE	0.113008	7.36493	0.236234	1	FALSE	0.108162	7.36468	0.422077	1	FALSE
1	25933867	25934488	MAN1C1	ENSG00000117643	-9470	25943959	26112698	+	768	105	TRUE	0.500063	5.22478	0.00095795	1	FALSE	-0.419247	5.2248	0.000673214	1	FALSE	-0.542093	5.22479	2.67921e-05	0.306636	FALSE	0.383474	5.22479	0.00280741	1	FALSE	0.145811	5.22479	0.447095	1	FALSE	0.0935243	5.2248	0.472294	1	FALSE	0.209772	5.22474	0.282521	1	FALSE
1	25941779	25943094	MAN1C1	ENSG00000117643	-864	25943959	26112698	+	768	8	FALSE	0.191558	4.57078	0.304985	1	FALSE	-0.225969	4.5708	0.185562	1	FALSE	-1.26358	4.57079	2.60609e-11	3.37775e-07	FALSE	0.466377	4.57079	0.0121333	1	FALSE	0.321577	4.57079	0.278114	1	FALSE	0.667751	4.57081	0.000215763	1	FALSE	-0.0335361	4.57072	0.919162	1	FALSE
1	26201094	26202862	Y_RNA	ENSG00000207302	-1124	26203987	26204096	+	768	608	TRUE	-0.0826661	7.70968	0.483484	1	FALSE	-0.289421	7.70969	0.00054708	1	FALSE	0.120911	7.70968	0.122572	1	FALSE	0.450628	7.70968	1.97675e-07	0.00239128	FALSE	0.0831599	7.70968	0.560418	1	FALSE	-0.322083	7.70969	0.00080326	1	FALSE	-0.0366251	7.70966	0.809173	1	FALSE
1	26260169	26260678	AL033528.1	ENSG00000266763	21855	26238240	26238313	+	768	0	FALSE	0.41257	4.12548	0.0349337	1	FALSE	-0.117529	4.12549	0.680044	1	FALSE	-0.13629	4.12549	0.588578	1	FALSE	-0.102505	4.12549	0.99652	1	FALSE	0.0679899	4.12549	0.812262	1	FALSE	0.027996	4.12549	0.93805	1	FALSE	0.0104508	4.12548	1	1	FALSE
1	26325149	26325422	PAFAH2	ENSG00000158006	-500	26286258	26324648	-	768	8	FALSE	1.27915	4.21265	7.29235e-08	0.000904543	FALSE	-0.450275	4.21266	0.051293	1	FALSE	-0.613186	4.21265	0.00537681	1	FALSE	-0.437981	4.21265	0.101036	1	FALSE	-0.519456	4.21265	0.306844	1	FALSE	0.745848	4.21266	0.00142261	1	FALSE	-0.833121	4.21264	0.00976598	1	FALSE
1	26436536	26437163	PDIK1L	ENSG00000175087	-500	26437664	26448615	+	768	450	TRUE	0.45452	6.76117	0.000522619	1	FALSE	-0.177676	6.76126	0.11146	1	FALSE	0.127777	6.7612	0.163321	1	FALSE	0.19419	6.76123	0.0889272	1	FALSE	-0.136203	6.76122	0.45736	1	FALSE	-0.461516	6.76127	0.000212783	1	FALSE	-0.19684	6.76095	0.209069	1	FALSE
1	26826418	26828439	DPPA2P2	ENSG00000224129	17405	26845845	26846741	-	768	115	TRUE	0.815609	6.35903	3.83982e-09	4.86198e-05	TRUE	-0.570774	6.35919	6.89783e-06	0.0769315	FALSE	0.0147248	6.35909	0.793385	1	FALSE	0.0609808	6.35914	0.631288	1	FALSE	0.939687	6.35912	6.5508e-07	0.00813413	TRUE	-0.643825	6.35921	3.17711e-06	0.0355233	FALSE	-0.308747	6.35864	0.0897849	1	FALSE
1	26945882	26948600	RP11-492M19.3	ENSG00000229247	18267	26966868	26967105	-	768	162	TRUE	1.00626	6.74708	6.26643e-13	8.19712e-09	TRUE	-1.07322	6.74723	1.05125e-16	1.38302e-12	TRUE	-0.121867	6.74713	0.355793	1	FALSE	-0.0776069	6.74718	0.570992	1	FALSE	0.974157	6.74716	6.64882e-07	0.00825385	TRUE	-0.185673	6.74724	0.187641	1	FALSE	-0.000637537	6.74673	0.968796	1	FALSE
1	27003375	27004690	RP5-968P14.2	ENSG00000260063	13932	27018623	27020622	-	768	1	FALSE	0.371501	4.24151	0.186799	1	FALSE	-0.478292	4.24154	0.0337321	1	FALSE	-0.30169	4.24152	0.283472	1	FALSE	-1.19895	4.24153	9.93218e-07	0.0118223	FALSE	-0.316194	4.24153	0.512342	1	FALSE	1.40983	4.24154	1.31582e-11	1.62885e-07	FALSE	-0.419768	4.24145	0.251621	1	FALSE
1	27009204	27009579	RP5-968P14.2	ENSG00000260063	9043	27018623	27020622	-	768	24	FALSE	0.155287	4.30104	0.632262	1	FALSE	-0.314516	4.30107	0.142872	1	FALSE	-0.774918	4.30105	0.000243196	1	FALSE	-0.853299	4.30106	0.000362332	1	FALSE	-0.158435	4.30106	1	1	FALSE	1.57606	4.30107	2.17411e-16	2.77894e-12	FALSE	-0.439177	4.30098	0.225483	1	FALSE
1	27021123	27022023	ARID1A	ENSG00000117713	-500	27022524	27108595	+	768	630	TRUE	0.543034	7.11612	3.30494e-10	4.23429e-06	FALSE	-0.443946	7.11616	1.7351e-09	2.14735e-05	FALSE	-0.18658	7.11613	0.0104001	1	FALSE	0.134812	7.11615	0.0735826	1	FALSE	0.705218	7.11614	1.62892e-09	2.09023e-05	TRUE	-0.0394799	7.11616	0.55362	1	FALSE	-0.298392	7.11603	0.00653378	1	FALSE
1	27136677	27137213	RN7SL165P	ENSG00000241188	-4099	27141313	27141601	+	768	6	FALSE	0.0353876	4.61192	0.944444	1	FALSE	-0.126286	4.61194	0.260944	1	FALSE	-0.131615	4.61193	0.428953	1	FALSE	0.199383	4.61193	0.0728605	1	FALSE	-0.123422	4.61193	0.916942	1	FALSE	-0.129165	4.61194	0.323596	1	FALSE	0.386631	4.61189	0.0741941	1	FALSE
1	27147221	27147935	ZDHHC18	ENSG00000204160	-5265	27153201	27184092	+	768	6	FALSE	-0.0940781	4.51096	0.612859	1	FALSE	-0.0537079	4.51096	0.450238	1	FALSE	-0.159588	4.51096	0.433111	1	FALSE	-0.202815	4.51096	0.325569	1	FALSE	0.685224	4.51096	0.0010676	1	FALSE	0.341775	4.51096	0.0358095	1	FALSE	-0.248812	4.51095	0.217652	1	FALSE
1	27152214	27152700	ZDHHC18	ENSG00000204160	-500	27153201	27184092	+	768	8	FALSE	-0.230565	4.31767	0.39744	1	FALSE	-0.122593	4.31772	0.401072	1	FALSE	-0.400384	4.31769	0.116906	1	FALSE	-0.0308696	4.3177	0.655643	1	FALSE	0.766689	4.3177	0.0112062	1	FALSE	0.350732	4.31772	0.049675	1	FALSE	0.125683	4.31756	0.651088	1	FALSE
1	27189094	27189132	SFN	ENSG00000175793	-500	27189633	27190947	+	768	363	TRUE	-1.28997	5.14745	2.38648e-08	0.000298215	TRUE	-0.0162803	5.14743	0.823913	1	FALSE	-1.06168	5.14744	3.2961e-12	4.30043e-08	TRUE	-0.329432	5.14744	0.065437	1	FALSE	-0.274474	5.14744	0.413585	1	FALSE	1.64941	5.14743	5.27556e-35	7.01597e-31	TRUE	0.0351935	5.1475	0.882876	1	FALSE
1	27667892	27668012	SYTL1	ENSG00000142765	-500	27668513	27680421	+	768	65	TRUE	0.0876067	4.35422	0.900197	1	FALSE	-0.519668	4.35424	0.00184316	1	FALSE	0.0771691	4.35422	0.479514	1	FALSE	0.405107	4.35423	0.0268636	1	FALSE	-0.169621	4.35423	0.926115	1	FALSE	0.113404	4.35424	0.475141	1	FALSE	-0.274167	4.35417	0.445531	1	FALSE
1	27817170	27819703	WASF2	ENSG00000158195	-500	27730730	27816669	-	768	10	FALSE	0.503699	4.87144	0.00394329	1	FALSE	-0.765971	4.87158	1.5898e-06	0.0182032	FALSE	-0.188352	4.87149	0.268707	1	FALSE	-0.199506	4.87153	0.197262	1	FALSE	0.795215	4.87152	0.000644169	1	FALSE	0.418922	4.8716	0.00796578	1	FALSE	-0.0982137	4.87111	0.802119	1	FALSE
1	27826059	27827296	WASF2	ENSG00000158195	-9389	27730730	27816669	-	768	3	FALSE	-0.392911	4.53371	0.0969554	1	FALSE	-0.292597	4.53373	0.0519981	1	FALSE	-0.471317	4.53372	0.00156171	1	FALSE	-0.0618551	4.53372	0.883372	1	FALSE	0.595047	4.53372	0.0188144	1	FALSE	0.751647	4.53373	1.59574e-06	0.0180239	FALSE	0.197657	4.53368	0.472187	1	FALSE
1	27851637	27851815	RP1-159A19.4	ENSG00000237429	-500	27852316	27857072	+	768	10	FALSE	0.214008	4.17709	0.500813	1	FALSE	-0.590367	4.17711	0.00904131	1	FALSE	0.022775	4.17709	0.962567	1	FALSE	0.273573	4.1771	0.162361	1	FALSE	0.450235	4.1771	0.205604	1	FALSE	0.139033	4.17711	0.514097	1	FALSE	-0.536166	4.17704	0.208535	1	FALSE
1	28015734	28016779	CHMP1AP1	ENSG00000226662	-1751	28013321	28013982	-	768	0	FALSE	0.169004	4.13975	0.581206	1	FALSE	0.0552692	4.13975	0.803986	1	FALSE	-0.155886	4.13975	0.337233	1	FALSE	-0.224771	4.13975	0.458512	1	FALSE	0.301516	4.13975	0.243749	1	FALSE	0.193285	4.13975	0.307723	1	FALSE	-0.185928	4.13974	0.811555	1	FALSE
1	28051333	28051989	FAM76A	ENSG00000009780	-500	28052490	28089633	+	768	239	TRUE	0.706362	5.74084	1.20669e-05	0.141038	FALSE	-0.445082	5.74088	0.00202065	1	FALSE	0.504901	5.74086	5.25986e-05	0.594364	FALSE	-0.216602	5.74087	0.156729	1	FALSE	0.637474	5.74086	0.00534865	1	FALSE	-1.35058	5.74088	2.35185e-15	2.98897e-11	TRUE	-0.00163597	5.74076	0.936295	1	FALSE
1	28098690	28099193	STX12	ENSG00000117758	-500	28099694	28150963	+	768	0	FALSE	-0.107741	4.30084	0.724582	1	FALSE	-0.443197	4.30087	0.0305362	1	FALSE	-0.052559	4.30085	0.992122	1	FALSE	0.135116	4.30086	0.391678	1	FALSE	0.110319	4.30085	1	1	FALSE	0.142025	4.30087	0.627481	1	FALSE	0.474745	4.30077	0.056622	1	FALSE
1	28156404	28156788	PPP1R8	ENSG00000117751	-500	28157289	28178187	+	768	44	TRUE	0.147864	4.54851	0.696465	1	FALSE	-0.123618	4.5486	0.506225	1	FALSE	-0.715387	4.54854	9.79065e-05	1	FALSE	-0.318418	4.54857	0.0771588	1	FALSE	0.975599	4.54856	0.000147168	1	FALSE	0.697209	4.54861	4.28855e-05	0.45896	FALSE	-0.318381	4.54831	0.361753	1	FALSE
1	28184500	28185570	PPP1R8	ENSG00000117751	6312	28173601	28178187	+	768	9	FALSE	-1.07393	4.45042	0.0007195	1	FALSE	-0.374252	4.45044	0.0814855	1	FALSE	-0.74661	4.45043	0.00058587	1	FALSE	-0.58865	4.45044	0.0485935	1	FALSE	0.395266	4.45044	0.320068	1	FALSE	1.72169	4.45045	3.43621e-18	4.43168e-14	FALSE	-0.299697	4.45038	0.483667	1	FALSE
1	28195267	28196750	THEMIS2	ENSG00000130775	-2304	28199055	28213196	+	768	10	FALSE	-0.100497	4.72166	0.597141	1	FALSE	0.0445964	4.72173	0.75677	1	FALSE	-0.443252	4.72169	0.00687298	1	FALSE	-0.497147	4.72171	0.00288423	1	FALSE	0.357576	4.7217	0.227234	1	FALSE	0.651785	4.72174	8.37296e-05	0.881924	FALSE	0.252655	4.72149	0.181266	1	FALSE
1	28198424	28198554	THEMIS2	ENSG00000130775	-500	28199055	28213196	+	768	10	FALSE	0.283023	4.21349	0.16318	1	FALSE	0.308826	4.21351	0.125998	1	FALSE	-0.583676	4.2135	0.00169824	1	FALSE	-0.204022	4.2135	0.336674	1	FALSE	0.0275954	4.2135	1	1	FALSE	0.0698245	4.21351	0.943315	1	FALSE	0.328566	4.21347	0.401963	1	FALSE
1	28241758	28241843	RPA2	ENSG00000117748	-500	28218435	28241257	-	768	66	TRUE	0.0759567	4.20352	0.87903	1	FALSE	-0.270219	4.20356	0.117749	1	FALSE	-0.696174	4.20354	0.000572985	1	FALSE	-0.367908	4.20355	0.112024	1	FALSE	0.744351	4.20354	0.0386584	1	FALSE	0.738567	4.20356	0.000200224	1	FALSE	0.321389	4.20345	0.283821	1	FALSE
1	28415708	28416530	EYA3	ENSG00000158161	-500	28296855	28415207	-	768	25	FALSE	0.097645	4.60277	0.675046	1	FALSE	-0.554352	4.60289	0.00295765	1	FALSE	-0.44039	4.60281	0.0188457	1	FALSE	0.385502	4.60285	0.0322517	1	FALSE	0.589096	4.60284	0.0430866	1	FALSE	0.0310413	4.60291	0.869552	1	FALSE	0.451127	4.60248	0.0374129	1	FALSE
1	28454171	28454471	RP5-1053E7.3	ENSG00000214812	-6338	28446960	28447832	-	768	1	FALSE	0.14877	4.13353	0.572221	1	FALSE	-0.0718741	4.13353	0.913602	1	FALSE	0.22249	4.13353	0.165765	1	FALSE	-0.306962	4.13353	0.112755	1	FALSE	0.223615	4.13353	0.468218	1	FALSE	-0.210041	4.13353	0.455573	1	FALSE	0.112762	4.13353	0.812323	1	FALSE
1	28560037	28560079	DNAJC8	ENSG00000126698	-500	28527070	28559536	-	768	174	TRUE	-0.501909	4.6315	0.0246639	1	FALSE	-0.0973829	4.63147	0.5126	1	FALSE	-0.69681	4.63149	9.72858e-05	1	FALSE	-0.538822	4.63148	0.00421457	1	FALSE	-1.31832	4.63148	0.00110474	1	FALSE	1.61359	4.63147	1.10599e-24	1.45184e-20	TRUE	-0.0906023	4.63159	0.87274	1	FALSE
1	28584879	28585537	SESN2	ENSG00000130766	-500	28586038	28609002	+	768	7	FALSE	-0.065874	4.47737	0.72542	1	FALSE	-1.19973	4.47741	3.41424e-08	0.000410972	FALSE	0.0600496	4.47738	0.721339	1	FALSE	0.963762	4.4774	2.44943e-07	0.00295451	FALSE	-0.780779	4.47739	0.0391001	1	FALSE	0.122034	4.47741	0.588181	1	FALSE	-0.0539378	4.47728	1	1	FALSE
1	28654784	28655012	MED18	ENSG00000130772	-500	28655513	28661527	+	768	15	FALSE	0.41881	4.36204	0.148879	1	FALSE	-0.88281	4.36215	0.000162498	1	FALSE	-0.387058	4.36208	0.0749829	1	FALSE	-0.0969628	4.36212	0.589395	1	FALSE	0.868057	4.36211	0.00459153	1	FALSE	0.58866	4.36217	0.00466823	1	FALSE	-0.110895	4.36179	1	1	FALSE
1	28831882	28831954	RCC1	ENSG00000180198	-500	28832455	28865708	+	768	595	TRUE	0.443086	6.20892	0.00104217	1	FALSE	-0.985859	6.20905	1.48577e-16	1.95393e-12	TRUE	-0.0857963	6.20897	0.518402	1	FALSE	0.122673	6.20901	0.310837	1	FALSE	1.06082	6.209	9.56816e-10	1.23047e-05	TRUE	0.0840146	6.20907	0.534088	1	FALSE	-0.0947818	6.20862	0.590844	1	FALSE
1	28878567	28879096	TRNAU1AP	ENSG00000180098	-500	28879597	28905051	+	768	13	FALSE	0.216466	4.53537	0.473775	1	FALSE	-0.40323	4.53541	0.0186856	1	FALSE	-0.149607	4.53538	0.47031	1	FALSE	0.102169	4.53539	0.5833	1	FALSE	0.172945	4.53539	0.653493	1	FALSE	0.436507	4.53541	0.00255494	1	FALSE	-0.383053	4.53529	0.122022	1	FALSE
1	28994177	28994743	GMEB1	ENSG00000162419	-500	28995244	29045865	+	768	18	FALSE	0.793227	4.41983	0.00027385	1	FALSE	-0.818173	4.41994	0.000301412	1	FALSE	-0.604584	4.41987	0.00434726	1	FALSE	0.00625565	4.4199	1	1	FALSE	0.800443	4.41989	0.0083955	1	FALSE	0.230356	4.41995	0.334331	1	FALSE	0.15442	4.41958	0.506568	1	FALSE
1	29062468	29062632	YTHDF2	ENSG00000198492	-500	29063133	29069383	+	768	494	TRUE	-0.0277412	5.64969	0.829419	1	FALSE	-0.377009	5.64969	0.000365615	1	FALSE	-0.143853	5.64969	0.152578	1	FALSE	-0.261125	5.64969	0.022999	1	FALSE	0.212428	5.64969	0.195578	1	FALSE	0.761671	5.64969	3.15226e-14	3.98035e-10	TRUE	-0.121434	5.6497	0.350965	1	FALSE
1	29101546	29102520	YTHDF2	ENSG00000198492	5258	29063271	29096287	+	768	263	TRUE	-0.542401	6.08802	0.00106738	1	FALSE	-0.0492486	6.08802	0.595712	1	FALSE	-0.634083	6.08802	2.83914e-08	0.000355006	FALSE	-0.208653	6.08802	0.133672	1	FALSE	-0.52227	6.08802	0.0317936	1	FALSE	1.31856	6.08802	1.37986e-34	1.83397e-30	TRUE	-0.366607	6.08804	0.0297908	1	FALSE
1	29111657	29112452	YTHDF2	ENSG00000198492	15369	29063271	29096287	+	768	12	FALSE	-0.619641	4.78113	0.00102771	1	FALSE	0.268463	4.78112	0.075304	1	FALSE	-0.401722	4.78113	0.00827861	1	FALSE	-0.355538	4.78112	0.0302144	1	FALSE	-0.246313	4.78112	0.428246	1	FALSE	0.83009	4.78112	3.1383e-09	3.7851e-05	FALSE	0.0427631	4.78117	0.970803	1	FALSE
1	29209829	29213102	EPB41	ENSG00000159023	-500	29213603	29446532	+	768	128	TRUE	-0.206446	6.65035	0.160384	1	FALSE	-0.253065	6.65038	0.0293475	1	FALSE	-1.22023	6.65036	7.48557e-26	1.00449e-21	TRUE	-0.055441	6.65037	0.661854	1	FALSE	-0.685176	6.65037	0.0023811	1	FALSE	1.59033	6.65038	6.51892e-56	8.73796e-52	TRUE	-0.361228	6.65028	0.0340614	1	FALSE
1	29451554	29451653	TMEM200B	ENSG00000253304	-1106	29445940	29450447	-	768	13	FALSE	0.0754771	4.13512	0.690859	1	FALSE	-0.0742928	4.13512	0.806102	1	FALSE	-0.0430542	4.13512	1	1	FALSE	0.130615	4.13512	0.749651	1	FALSE	-0.0417301	4.13512	1	1	FALSE	-0.091839	4.13512	0.847685	1	FALSE	0.0718438	4.13513	0.938754	1	FALSE
1	29509000	29509668	SRSF4	ENSG00000116350	-500	29474255	29508499	-	768	52	TRUE	0.173907	4.97301	0.150208	1	FALSE	-0.222619	4.97304	0.0251825	1	FALSE	-0.396272	4.97302	0.00107139	1	FALSE	0.383752	4.97303	0.000541965	1	FALSE	-0.099282	4.97303	0.685547	1	FALSE	0.303871	4.97305	0.00960144	1	FALSE	-0.205029	4.97294	0.136618	1	FALSE
1	29557955	29558014	MECR	ENSG00000116353	-500	29547395	29557454	-	768	42	TRUE	1.59492	4.20868	7.75803e-11	1.00094e-06	TRUE	-1.01249	4.20876	3.50534e-05	0.377736	FALSE	-0.496535	4.20871	0.0566521	1	FALSE	-0.25303	4.20873	0.393842	1	FALSE	0.885185	4.20872	0.0194295	1	FALSE	-0.163907	4.20877	0.67403	1	FALSE	-0.918721	4.20849	0.0223384	1	FALSE
1	31231168	31233392	LAPTM5	ENSG00000162511	-500	31205316	31230667	-	768	28	FALSE	-2.83516	4.94564	5.64061e-11	7.28484e-07	FALSE	-0.326377	4.94573	0.232615	1	FALSE	-2.12477	4.94567	1.27798e-13	1.67964e-09	FALSE	0.113883	4.9457	0.656724	1	FALSE	0.110652	4.94569	0.778994	1	FALSE	1.99641	4.94574	3.76321e-16	4.80412e-12	FALSE	0.209391	4.94542	0.53735	1	FALSE
1	31255316	31255962	LAPTM5	ENSG00000162511	-24648	31205316	31230667	-	768	0	FALSE	0.37682	4.13382	0.110453	1	FALSE	-0.161791	4.13382	0.419724	1	FALSE	-0.267753	4.13382	0.10566	1	FALSE	-0.219513	4.13382	0.341367	1	FALSE	0.128486	4.13382	1	1	FALSE	0.00460542	4.13382	1	1	FALSE	0.585167	4.13382	0.00921943	1	FALSE
1	31296530	31296574	RP1-65J11.1	ENSG00000223382	-500	31297075	31307131	+	768	28	FALSE	0.143026	4.13524	1	1	FALSE	-0.0395865	4.13524	1	1	FALSE	-0.0905092	4.13524	0.589207	1	FALSE	0.00328971	4.13524	0.828907	1	FALSE	-0.0809798	4.13524	1	1	FALSE	0.0648054	4.13524	0.740036	1	FALSE	0.031396	4.13522	0.99352	1	FALSE
1	31539339	31539344	PUM1	ENSG00000134644	-500	31405697	31538838	-	768	61	TRUE	-0.197918	4.19762	0.388463	1	FALSE	0.0263449	4.19762	0.958421	1	FALSE	-0.159677	4.19762	0.390934	1	FALSE	-0.251497	4.19762	0.400088	1	FALSE	0.225813	4.19762	0.475096	1	FALSE	0.508053	4.19762	0.0223061	1	FALSE	-0.111823	4.19762	0.973014	1	FALSE
1	31627424	31628810	NKAIN1	ENSG00000084628	23781	31652592	31712401	-	768	51	TRUE	1.34675	5.37195	8.99477e-18	1.19495e-13	TRUE	-0.560692	5.37201	0.000261156	1	FALSE	-0.453521	5.37197	0.00213705	1	FALSE	-0.895158	5.37199	3.62421e-07	0.00435449	TRUE	0.186982	5.37198	0.502024	1	FALSE	0.593412	5.37202	0.000127085	1	FALSE	-0.488949	5.3718	0.0627141	1	FALSE
1	31643440	31644254	NKAIN1	ENSG00000084628	8337	31652592	31712401	-	768	1	FALSE	0.143437	4.14872	0.608676	1	FALSE	0.599836	4.14871	0.00339055	1	FALSE	-0.190134	4.14872	0.483122	1	FALSE	-0.426679	4.14872	0.076926	1	FALSE	-0.476388	4.14872	0.463081	1	FALSE	-0.012315	4.14871	1	1	FALSE	-0.252206	4.14872	0.597112	1	FALSE
1	31867224	31868441	SERINC2	ENSG00000168528	-13970	31882412	31907524	+	768	0	FALSE	0.752954	4.57147	3.11885e-05	0.35792	FALSE	-0.0731424	4.57149	0.538873	1	FALSE	0.341812	4.57148	0.02272	1	FALSE	-0.696952	4.57149	0.0003779	1	FALSE	-0.505811	4.57148	0.326167	1	FALSE	-0.21591	4.57149	0.237648	1	FALSE	-0.228364	4.57143	0.336539	1	FALSE
1	31913595	31914589	SERINC2	ENSG00000168528	6069	31885963	31907525	+	768	12	FALSE	-1.18352	4.45083	0.00437033	1	FALSE	-0.336001	4.45088	0.269696	1	FALSE	0.850637	4.45085	0.000622546	1	FALSE	-0.720174	4.45087	0.0270845	1	FALSE	-0.188101	4.45086	0.883049	1	FALSE	0.208978	4.45089	0.517162	1	FALSE	0.277066	4.4507	0.513949	1	FALSE
1	31926028	31927266	SERINC2	ENSG00000168528	18502	31885963	31907525	+	768	69	TRUE	-1.23468	5.83032	0.0020047	1	FALSE	-0.294036	5.83043	0.304897	1	FALSE	1.31306	5.83036	3.17595e-08	0.000396772	TRUE	-0.754066	5.8304	0.0190971	1	FALSE	0.393787	5.83039	0.357098	1	FALSE	-1.14816	5.83045	0.000610611	1	FALSE	0.318808	5.83004	0.374153	1	FALSE
1	31933170	31934717	SERINC2	ENSG00000168528	25644	31885963	31907525	+	768	85	TRUE	-1.67924	6.01115	8.8339e-06	0.103754	FALSE	-0.0704372	6.01124	0.804503	1	FALSE	1.09268	6.01118	8.23902e-07	0.0099725	TRUE	-0.742008	6.01121	0.0119744	1	FALSE	0.673383	6.0112	0.0954989	1	FALSE	-0.825688	6.01125	0.00588011	1	FALSE	0.235215	6.01094	0.472941	1	FALSE
1	31942749	31946564	RP11-439L8.2	ENSG00000215899	13871	31960436	31961777	-	768	82	TRUE	-1.71167	6.93808	1.6952e-06	0.0203715	FALSE	-0.586426	6.93814	0.0174071	1	FALSE	0.839259	6.9381	9.02487e-05	1	FALSE	-0.658242	6.93812	0.0181025	1	FALSE	1.82685	6.93811	1.64611e-07	0.00206423	TRUE	-0.589604	6.93814	0.036361	1	FALSE	0.108086	6.93796	0.706511	1	FALSE
1	31949279	31950631	RP11-439L8.2	ENSG00000215899	9804	31960436	31961777	-	768	74	TRUE	-2.64447	6.37866	7.48389e-07	0.00907496	TRUE	-2.73399	6.37861	7.31806e-13	9.41761e-09	TRUE	-0.737326	6.37865	0.0274276	1	FALSE	-1.90337	6.37863	4.51111e-06	0.0524913	FALSE	5.09553	6.37863	1.74526e-61	2.34213e-57	TRUE	-1.39717	6.37861	0.000694654	1	FALSE	-1.53408	6.37879	0.00801708	1	FALSE
1	31955351	31955435	RP11-439L8.2	ENSG00000215899	5000	31960436	31961777	-	768	11	FALSE	-1.05365	4.24143	0.00886876	1	FALSE	-0.978245	4.24145	0.00146114	1	FALSE	-0.524468	4.24144	0.081193	1	FALSE	-1.20608	4.24145	0.000185242	1	FALSE	0.298362	4.24145	0.519941	1	FALSE	2.03894	4.24146	4.40775e-13	5.52468e-09	FALSE	0.089328	4.24139	0.878656	1	FALSE
1	32014241	32016156	RP11-73M7.1	ENSG00000229167	21029	32037186	32041174	-	768	77	TRUE	1.71573	5.7349	4.04016e-11	5.22595e-07	TRUE	-1.42129	5.7348	6.33459e-08	0.000757427	TRUE	-0.54647	5.73487	0.0252893	1	FALSE	0.281805	5.73483	0.259977	1	FALSE	0.826788	5.73485	0.0348149	1	FALSE	-0.866684	5.73479	0.00308545	1	FALSE	0.0411378	5.73513	0.853878	1	FALSE
1	32071033	32072347	HCRTR1	ENSG00000121764	-10939	32083287	32089350	+	768	5	FALSE	0.0588069	4.8687	0.565369	1	FALSE	0.146569	4.86874	0.433303	1	FALSE	-0.469539	4.86871	0.000595741	1	FALSE	-0.166019	4.86873	0.366672	1	FALSE	-0.0457261	4.86872	0.991825	1	FALSE	0.664816	4.86875	1.73055e-06	0.0195206	FALSE	-0.428671	4.8686	0.0239222	1	FALSE
1	32180079	32181398	COL16A1	ENSG00000084636	-10158	32144831	32169920	-	768	8	FALSE	1.29234	4.42152	2.36101e-11	3.06105e-07	FALSE	-0.279499	4.42155	0.212294	1	FALSE	-0.199981	4.42153	0.348233	1	FALSE	-0.389667	4.42154	0.0594789	1	FALSE	-0.677672	4.42154	0.0543395	1	FALSE	-0.170247	4.42156	0.564772	1	FALSE	-0.0870959	4.42144	0.672125	1	FALSE
1	32410958	32410980	PTP4A2	ENSG00000184007	-500	32384731	32410457	-	768	91	TRUE	0.241446	4.25519	0.300485	1	FALSE	-0.640632	4.25525	0.00381739	1	FALSE	-0.20616	4.25521	0.473211	1	FALSE	0.29239	4.25523	0.211458	1	FALSE	0.65922	4.25523	0.0660061	1	FALSE	-0.0332426	4.25526	1	1	FALSE	0.146048	4.25505	0.681629	1	FALSE
1	32421601	32422444	PTP4A2	ENSG00000184007	-11143	32384731	32410457	-	768	4	FALSE	-0.142147	4.25196	0.69925	1	FALSE	-0.671569	4.25196	0.000199543	1	FALSE	-0.157908	4.25196	0.39943	1	FALSE	0.064038	4.25196	0.660367	1	FALSE	-0.194901	4.25196	0.899582	1	FALSE	0.57024	4.25196	0.00496439	1	FALSE	0.618341	4.25198	0.0429794	1	FALSE
1	32429470	32430112	PTP4A2	ENSG00000184007	-19012	32384731	32410457	-	768	5	FALSE	-0.517924	4.3149	0.151362	1	FALSE	-0.0259444	4.31492	0.88048	1	FALSE	1.24857	4.3149	3.0875e-10	3.96497e-06	FALSE	-0.968275	4.31491	0.000951691	1	FALSE	-0.090134	4.31491	0.880952	1	FALSE	-0.743512	4.31492	0.00856662	1	FALSE	-0.532836	4.31485	0.202096	1	FALSE
1	32445757	32447815	KHDRBS1	ENSG00000121774	-31614	32479430	32509483	+	768	0	FALSE	-0.388246	4.47714	0.15082	1	FALSE	0.00395122	4.47718	0.987765	1	FALSE	-0.136202	4.47715	0.659451	1	FALSE	-0.592835	4.47717	0.00259157	1	FALSE	0.570325	4.47716	0.10257	1	FALSE	0.476884	4.47719	0.0134201	1	FALSE	0.307783	4.47704	0.260769	1	FALSE
1	32450153	32451871	KHDRBS1	ENSG00000121774	-27558	32479430	32509483	+	768	15	FALSE	-1.08489	4.64601	0.000154731	1	FALSE	-0.588303	4.6461	0.00743267	1	FALSE	-1.15599	4.64604	8.97178e-08	0.00111214	FALSE	-0.222448	4.64607	0.345178	1	FALSE	0.344162	4.64606	0.415956	1	FALSE	1.70804	4.64611	8.73891e-21	1.13789e-16	FALSE	0.241916	4.64578	0.431283	1	FALSE
1	32478634	32478929	KHDRBS1	ENSG00000121774	-500	32479430	32509483	+	768	65	TRUE	-0.00871711	4.47039	0.812897	1	FALSE	-0.975317	4.47044	8.14462e-07	0.00942007	TRUE	-0.482927	4.4704	0.00611798	1	FALSE	0.116282	4.47042	0.484325	1	FALSE	1.31873	4.47041	1.00339e-08	0.000127872	TRUE	0.405892	4.47044	0.0183491	1	FALSE	0.272725	4.47027	0.213443	1	FALSE
1	32756767	32757186	HDAC1	ENSG00000116478	-500	32757687	32799236	+	768	25	FALSE	0.951517	4.37469	2.08182e-06	0.0249673	FALSE	-0.722847	4.37476	0.000914154	1	FALSE	-0.353809	4.37472	0.0729742	1	FALSE	0.0306175	4.37474	0.959397	1	FALSE	0.33357	4.37473	0.44172	1	FALSE	-0.0435669	4.37477	0.975525	1	FALSE	0.150562	4.37453	0.406639	1	FALSE
1	32807018	32808657	MARCKSL1	ENSG00000175130	-5037	32799433	32801980	-	768	13	FALSE	0.0998744	5.22112	0.550098	1	FALSE	-0.18953	5.22126	0.223506	1	FALSE	-0.544342	5.22117	0.000276342	1	FALSE	0.640039	5.22122	8.18839e-06	0.0943221	FALSE	-0.861124	5.2212	0.00377509	1	FALSE	0.350342	5.22128	0.0196264	1	FALSE	-0.237825	5.22077	0.23678	1	FALSE
1	32860833	32861039	BSDC1	ENSG00000160058	-500	32844364	32860332	-	768	81	TRUE	0.335109	4.48935	0.104903	1	FALSE	-0.272559	4.4894	0.232161	1	FALSE	-0.517573	4.48937	0.00271254	1	FALSE	0.711699	4.48938	2.70237e-06	0.031688	FALSE	-0.130354	4.48938	0.736912	1	FALSE	0.00199539	4.48941	0.91364	1	FALSE	-0.39423	4.48922	0.0610251	1	FALSE
1	32879051	32879966	RP11-395N6.4	ENSG00000270850	-7613	32887580	32887920	+	768	1	FALSE	0.592387	4.19707	0.034367	1	FALSE	-0.193741	4.19707	0.459462	1	FALSE	-0.469711	4.19707	0.0304704	1	FALSE	0.402725	4.19707	0.0498856	1	FALSE	0.369825	4.19707	0.263113	1	FALSE	-0.330137	4.19707	0.554009	1	FALSE	-0.173915	4.19707	0.414791	1	FALSE
1	33177842	33178334	RP11-114B7.6	ENSG00000224409	5000	33183335	33190838	-	768	3	FALSE	-0.220087	4.17291	0.503292	1	FALSE	-0.0033532	4.17291	0.932894	1	FALSE	-0.127826	4.17291	0.489353	1	FALSE	-0.0581198	4.17291	1	1	FALSE	-0.743503	4.17291	0.11709	1	FALSE	0.498043	4.17291	0.0271498	1	FALSE	0.180133	4.17292	0.386179	1	FALSE
1	33191339	33191490	RP11-114B7.6	ENSG00000224409	-500	33183335	33190838	-	768	3	FALSE	0.262865	4.13493	0.690859	1	FALSE	-0.0247016	4.13493	1	1	FALSE	-0.00510349	4.13493	1	1	FALSE	0.0178977	4.13493	0.749651	1	FALSE	-0.314393	4.13493	0.743181	1	FALSE	-0.018259	4.13493	1	1	FALSE	-0.127728	4.13493	1	1	FALSE
1	33199084	33199813	KIAA1522	ENSG00000162522	-7672	33207486	33240571	+	768	0	FALSE	0.0244152	4.14328	1	1	FALSE	-0.168612	4.14328	0.585146	1	FALSE	-0.366638	4.14328	0.0585238	1	FALSE	0.328892	4.14328	0.120678	1	FALSE	0.377807	4.14328	0.33615	1	FALSE	0.205086	4.14328	0.452332	1	FALSE	-0.254703	4.14326	0.637813	1	FALSE
1	33206714	33206985	KIAA1522	ENSG00000162522	-500	33207486	33240571	+	768	6	FALSE	0.326584	4.14202	0.154653	1	FALSE	-0.314181	4.14203	0.125347	1	FALSE	-0.21818	4.14203	0.230946	1	FALSE	-0.149202	4.14203	0.350296	1	FALSE	0.136284	4.14203	0.790872	1	FALSE	0.467708	4.14203	0.0192777	1	FALSE	-0.0811167	4.142	1	1	FALSE
1	33385561	33386121	AL031602.1	ENSG00000221423	-5773	33391895	33392000	+	768	1	FALSE	-0.279332	4.16914	0.330695	1	FALSE	-0.0451229	4.16914	0.836521	1	FALSE	-0.502636	4.16914	0.0080274	1	FALSE	-0.0816395	4.16914	0.717885	1	FALSE	0.37173	4.16914	0.277133	1	FALSE	0.618123	4.16914	0.00525679	1	FALSE	0.191323	4.16914	0.542669	1	FALSE
1	33430787	33431193	RNF19B	ENSG00000116514	-500	33402269	33430286	-	768	26	FALSE	1.14444	4.65506	2.33757e-10	3.00168e-06	FALSE	-1.11672	4.65519	1.65203e-09	2.04505e-05	FALSE	-0.441101	4.6551	0.0153721	1	FALSE	-0.207441	4.65515	0.283924	1	FALSE	1.05216	4.65513	2.98366e-05	0.355622	FALSE	0.269991	4.65521	0.128889	1	FALSE	-0.572611	4.65472	0.0793938	1	FALSE
1	33591899	33594302	ADC	ENSG00000142920	5767	33547260	33586131	+	768	431	TRUE	0.725934	7.68579	3.65905e-12	4.76444e-08	TRUE	-0.465821	7.68584	4.00627e-07	0.00468573	FALSE	-0.142055	7.6858	0.118025	1	FALSE	0.584526	7.68582	1.07508e-10	1.36901e-06	FALSE	0.365259	7.68582	0.0193827	1	FALSE	-0.937126	7.68584	7.55361e-20	9.80383e-16	TRUE	-0.0997968	7.68566	0.43893	1	FALSE
1	33720524	33721645	ZNF362	ENSG00000160094	-500	33722146	33746015	+	768	117	TRUE	0.745782	5.7999	2.16483e-08	0.000270668	TRUE	-0.630295	5.79998	2.07937e-07	0.00245158	FALSE	-0.548784	5.79993	3.38446e-06	0.0401431	FALSE	0.00283147	5.79996	0.970905	1	FALSE	-0.17093	5.79995	0.377791	1	FALSE	0.647155	5.8	1.00851e-07	0.00117723	FALSE	-0.0228023	5.7997	0.928873	1	FALSE
1	33925482	33927420	TLR12P	ENSG00000234512	-4429	33931850	33934555	+	768	1	FALSE	0.640727	4.23349	0.00805324	1	FALSE	-0.629701	4.23351	0.00595694	1	FALSE	-0.362462	4.2335	0.12483	1	FALSE	0.262627	4.2335	0.265246	1	FALSE	0.492854	4.2335	0.215542	1	FALSE	0.0980363	4.23351	0.78356	1	FALSE	-0.124797	4.23344	0.736752	1	FALSE
1	35325918	35326036	SMIM12	ENSG00000163866	-500	35318270	35325417	-	768	5	FALSE	0.188625	4.14653	0.232613	1	FALSE	0.0088637	4.14653	1	1	FALSE	0.117375	4.14653	0.534858	1	FALSE	-0.00292346	4.14653	1	1	FALSE	-0.472361	4.14653	0.397805	1	FALSE	-0.293285	4.14653	0.24945	1	FALSE	0.179074	4.14652	0.902304	1	FALSE
1	35586461	35586781	EFCAB14P1	ENSG00000228348	-841	35587623	35588085	+	768	4	FALSE	-0.144704	4.15982	0.930965	1	FALSE	0.0614845	4.15982	0.924208	1	FALSE	0.241122	4.15982	0.192485	1	FALSE	0.00450194	4.15982	1	1	FALSE	-0.137334	4.15982	1	1	FALSE	-0.231384	4.15981	0.172643	1	FALSE	-0.0890084	4.15983	0.984461	1	FALSE
1	35611516	35612313	EFCAB14P1	ENSG00000228348	23430	35587623	35588085	+	768	8	FALSE	-0.352887	4.38403	0.130175	1	FALSE	0.826406	4.38402	6.19614e-07	0.00719992	FALSE	-0.530632	4.38402	0.00408343	1	FALSE	-0.202251	4.38402	0.418829	1	FALSE	-0.567242	4.38402	0.129321	1	FALSE	0.148863	4.38402	0.520401	1	FALSE	-0.0512684	4.38405	0.773777	1	FALSE
1	35659250	35659448	SFPQ	ENSG00000116560	-500	35648533	35658749	-	768	356	TRUE	0.240675	5.16308	0.0802466	1	FALSE	-0.338881	5.16316	0.00316671	1	FALSE	-0.528753	5.16311	2.85726e-06	0.0339814	FALSE	0.222934	5.16314	0.043826	1	FALSE	0.151525	5.16313	0.424795	1	FALSE	0.53265	5.16318	2.65387e-06	0.0297392	FALSE	-0.0990487	5.16287	0.375008	1	FALSE
1	35733570	35734067	ZMYM4	ENSG00000146463	-500	35734568	35887544	+	768	126	TRUE	0.909174	5.6664	1.2781e-13	1.67763e-09	TRUE	-0.875187	5.66652	1.3148e-12	1.68846e-08	TRUE	-0.0517214	5.66644	0.743851	1	FALSE	0.0497216	5.66648	0.662407	1	FALSE	0.561738	5.66647	0.00310047	1	FALSE	-0.267178	5.66653	0.0206766	1	FALSE	0.0274307	5.66611	0.819287	1	FALSE
1	36107946	36108478	PSMB2	ENSG00000126067	-500	36067185	36107445	-	768	67	TRUE	0.561525	4.64399	0.0107512	1	FALSE	-0.429287	4.64403	0.019815	1	FALSE	-0.618586	4.644	0.00143137	1	FALSE	-0.75231	4.64402	0.000489576	1	FALSE	-1.01726	4.64401	0.00502021	1	FALSE	1.01042	4.64404	2.80135e-08	0.000331596	TRUE	0.650842	4.64389	0.00973488	1	FALSE
1	36244798	36246006	CLSPN	ENSG00000092853	-9229	36185819	36235568	-	768	1	FALSE	0.355092	4.33152	0.0946824	1	FALSE	-0.143043	4.33156	0.482537	1	FALSE	-0.173618	4.33153	0.5034	1	FALSE	0.0957555	4.33154	0.858876	1	FALSE	0.68796	4.33154	0.0177706	1	FALSE	-0.186165	4.33156	0.484503	1	FALSE	-0.424791	4.33144	0.295113	1	FALSE
1	36273183	36273272	AGO4	ENSG00000134698	-500	36273773	36323491	+	768	75	TRUE	-0.12566	4.3123	0.5459	1	FALSE	-0.900904	4.31233	4.19048e-05	0.449387	FALSE	-0.603102	4.31231	0.00311635	1	FALSE	0.0920277	4.31232	0.8923	1	FALSE	0.294155	4.31232	0.403672	1	FALSE	0.881796	4.31233	2.02685e-06	0.0228142	FALSE	0.650809	4.31223	0.0200623	1	FALSE
1	36615599	36618520	TRAPPC3	ENSG00000054116	-500	36602655	36615098	-	768	208	TRUE	0.173862	7.0861	0.113462	1	FALSE	-0.642221	7.08616	4.48538e-13	5.77896e-09	FALSE	-0.600026	7.08612	1.88796e-12	2.46624e-08	FALSE	0.289069	7.08614	0.00175713	1	FALSE	-0.0995959	7.08613	0.464778	1	FALSE	0.753889	7.08616	1.08833e-17	1.40058e-13	TRUE	0.197597	7.08596	0.124339	1	FALSE
1	36620255	36620679	MAP7D1	ENSG00000116871	-500	36621180	36640609	+	768	373	TRUE	0.556406	6.04103	0.000241355	1	FALSE	-0.73717	6.04119	3.22054e-08	0.000387914	TRUE	-0.605548	6.04109	2.60578e-06	0.0310583	FALSE	0.449251	6.04114	0.000613707	1	FALSE	0.331774	6.04112	0.146508	1	FALSE	0.26941	6.04122	0.0522844	1	FALSE	0.137519	6.04063	0.476756	1	FALSE
1	36653394	36654163	RN7SL131P	ENSG00000264592	-3352	36657516	36657769	+	768	62	TRUE	-0.436846	4.88808	0.0998052	1	FALSE	-0.004803	4.8881	0.846561	1	FALSE	-0.859807	4.88809	4.20253e-06	0.0497033	FALSE	-0.763268	4.88809	0.000213815	1	FALSE	-1.00817	4.88809	0.0142863	1	FALSE	1.63999	4.8881	2.99225e-25	3.93151e-21	TRUE	-0.0993532	4.88804	0.65314	1	FALSE
1	36672665	36673732	RN7SL131P	ENSG00000264592	14895	36657516	36657769	+	768	0	FALSE	0.0283648	4.23671	0.997423	1	FALSE	-0.384735	4.23673	0.0651089	1	FALSE	0.00469268	4.23672	0.997126	1	FALSE	-0.347237	4.23673	0.294698	1	FALSE	-0.907898	4.23672	0.0355536	1	FALSE	0.958446	4.23674	5.34739e-06	0.0593293	FALSE	-0.260652	4.23666	0.436053	1	FALSE
1	36688178	36689516	THRAP3	ENSG00000054118	-500	36690017	36770958	+	768	348	TRUE	0.34088	6.43267	0.000446017	1	FALSE	-0.203157	6.43272	0.015522	1	FALSE	-0.305268	6.43268	0.000269646	1	FALSE	0.277767	6.4327	0.00106357	1	FALSE	-0.311098	6.4327	0.0241371	1	FALSE	0.131065	6.43272	0.235128	1	FALSE	0.0289764	6.43254	0.772182	1	FALSE
1	37980876	37981162	MEAF6	ENSG00000163875	-500	37958779	37980375	-	768	10	FALSE	0.586079	4.29576	0.0139538	1	FALSE	-0.518021	4.29582	0.0115688	1	FALSE	-0.454137	4.29578	0.0496065	1	FALSE	0.111009	4.2958	0.710805	1	FALSE	0.786827	4.2958	0.00889702	1	FALSE	0.0980456	4.29583	0.381845	1	FALSE	-0.153914	4.29563	0.577832	1	FALSE
1	38062037	38062541	GNL2	ENSG00000134697	-500	38059086	38061536	-	768	3	FALSE	0.458952	4.20538	0.075158	1	FALSE	-0.140891	4.20541	0.795727	1	FALSE	-0.379745	4.20539	0.110952	1	FALSE	0.645605	4.2054	0.0018196	1	FALSE	0.030899	4.2054	0.996195	1	FALSE	-0.541202	4.20542	0.0243456	1	FALSE	-0.279433	4.20532	0.47932	1	FALSE
1	38139766	38142241	C1orf109	ENSG00000116922	5000	38147242	38156192	-	768	15	FALSE	0.798265	4.90654	3.60772e-06	0.0429751	FALSE	-0.0790718	4.90666	0.696134	1	FALSE	-0.529971	4.90658	0.0014565	1	FALSE	0.147998	4.90662	0.353462	1	FALSE	0.667218	4.90661	0.00862179	1	FALSE	-0.802945	4.90668	1.44612e-05	0.158105	FALSE	0.199151	4.90623	0.40814	1	FALSE
1	38231306	38232033	EPHA10	ENSG00000183317	-500	38225944	38230805	-	768	11	FALSE	0.966801	4.4663	4.23434e-05	0.482545	FALSE	0.0488161	4.46632	0.815544	1	FALSE	0.767214	4.4663	3.069e-05	0.350265	FALSE	-1.88254	4.46631	1.86549e-13	2.4285e-09	FALSE	-1.50856	4.46631	0.00134938	1	FALSE	-0.419992	4.46632	0.0939474	1	FALSE	-0.360769	4.46624	0.338026	1	FALSE
1	38413230	38414582	INPP5B	ENSG00000204084	-500	38326369	38412729	-	768	5	FALSE	1.20206	4.51111	2.04807e-09	2.60228e-05	FALSE	-0.385407	4.51121	0.05184	1	FALSE	0.333316	4.51115	0.0449642	1	FALSE	-1.42815	4.51118	1.09275e-09	1.37478e-05	FALSE	-0.68466	4.51117	0.126651	1	FALSE	-0.226286	4.51122	0.395224	1	FALSE	0.230507	4.51087	0.446403	1	FALSE
1	38495497	38496729	UTP11L	ENSG00000183520	5000	38478414	38490496	+	768	10	FALSE	-0.0657339	4.66962	0.771798	1	FALSE	-0.353628	4.6697	0.0248338	1	FALSE	-0.274642	4.66965	0.128663	1	FALSE	-0.0496242	4.66968	0.990213	1	FALSE	0.300428	4.66967	0.278971	1	FALSE	0.823156	4.66971	5.1453e-07	0.00589085	FALSE	-0.503605	4.66944	0.0453993	1	FALSE
1	38939168	38940367	RP11-329N22.1	ENSG00000238063	-500	38940868	38942156	+	768	48	TRUE	1.02925	5.47993	4.12684e-12	5.37109e-08	TRUE	-0.382761	5.48001	0.00775598	1	FALSE	-0.460765	5.47996	0.000986753	1	FALSE	0.894918	5.47998	3.08486e-12	3.98472e-08	TRUE	-1.11504	5.47998	9.04036e-05	1	FALSE	-1.33131	5.48002	4.85999e-16	6.20135e-12	TRUE	0.133937	5.47972	0.584211	1	FALSE
1	38963977	38965336	RP11-329N22.1	ENSG00000238063	21820	38940868	38942156	+	768	1	FALSE	0.844754	4.34235	0.000780917	1	FALSE	-0.45198	4.34239	0.0575049	1	FALSE	-0.668372	4.34237	0.00461411	1	FALSE	-0.127821	4.34238	0.543432	1	FALSE	-1.1144	4.34238	0.0150209	1	FALSE	0.441275	4.3424	0.0644852	1	FALSE	0.636114	4.34226	0.0287186	1	FALSE
1	38992498	38994104	RP11-329N22.1	ENSG00000238063	50341	38940868	38942156	+	768	0	FALSE	0.65215	4.18573	0.0111044	1	FALSE	-0.419521	4.18575	0.0518321	1	FALSE	0.10672	4.18574	0.57466	1	FALSE	0.060259	4.18574	0.981682	1	FALSE	-0.944781	4.18574	0.0529413	1	FALSE	-0.0225744	4.18575	1	1	FALSE	-0.0927301	4.18569	0.918638	1	FALSE
1	39024544	39026148	RP11-329N22.1	ENSG00000238063	82387	38940868	38942156	+	768	59	TRUE	0.997558	5.57894	8.33557e-08	0.00103311	TRUE	-0.0718891	5.57894	0.718389	1	FALSE	-0.168954	5.57894	0.340627	1	FALSE	0.392335	5.57894	0.023605	1	FALSE	-1.55455	5.57894	1.42659e-05	0.171804	FALSE	-1.12723	5.57894	1.84823e-08	0.000219662	TRUE	0.158002	5.57895	0.514309	1	FALSE
1	39281402	39282411	RRAGC	ENSG00000116954	21458	39303870	39325495	-	768	7	FALSE	1.00608	4.34567	0.0011621	1	FALSE	-1.06825	4.34568	8.10264e-05	0.853208	FALSE	0.83086	4.34568	0.00049207	1	FALSE	-1.71399	4.34568	3.65476e-08	0.000449133	FALSE	-0.198767	4.34568	0.816046	1	FALSE	-0.337898	4.34568	0.265054	1	FALSE	0.58342	4.34566	0.108245	1	FALSE
1	39455838	39456394	AKIRIN1	ENSG00000174574	-500	39456895	39471731	+	768	10	FALSE	1.25761	4.46868	1.08009e-09	1.37657e-05	FALSE	-0.842111	4.46883	0.000198958	1	FALSE	-0.770803	4.46874	0.00017483	1	FALSE	-0.192798	4.46879	0.484142	1	FALSE	0.30119	4.46877	0.429462	1	FALSE	0.307302	4.46885	0.161066	1	FALSE	0.152042	4.46832	0.628877	1	FALSE
1	39491111	39491489	NDUFS5	ENSG00000168653	-500	39491990	39500308	+	768	21	FALSE	0.171384	4.4447	0.430968	1	FALSE	0.0125489	4.44473	1	1	FALSE	-0.386201	4.44471	0.0222381	1	FALSE	0.074146	4.44472	0.815119	1	FALSE	0.22375	4.44472	0.777145	1	FALSE	0.353894	4.44473	0.0149051	1	FALSE	-0.461207	4.44464	0.118526	1	FALSE
1	40061892	40065920	PABPC4	ENSG00000090621	-19429	40038065	40042462	-	768	41	TRUE	0.0487969	5.70364	0.750878	1	FALSE	-0.0723499	5.70371	0.536579	1	FALSE	-0.450803	5.70367	7.04056e-05	0.790162	FALSE	0.225452	5.70369	0.0603326	1	FALSE	-0.406056	5.70368	0.0523452	1	FALSE	0.462452	5.70372	8.48622e-05	0.893345	FALSE	-0.0191636	5.70348	0.891316	1	FALSE
1	40070627	40072755	HEYL	ENSG00000163909	17069	40089825	40105617	-	768	39	TRUE	0.270407	5.44493	0.0600086	1	FALSE	-0.381279	5.44497	0.000921623	1	FALSE	-0.51467	5.44494	1.42264e-06	0.0170959	FALSE	-0.152794	5.44496	0.199783	1	FALSE	-0.158486	5.44495	0.505172	1	FALSE	0.869729	5.44498	8.56825e-17	1.09759e-12	TRUE	0.0403754	5.44482	0.809426	1	FALSE
1	40263732	40266496	RP1-118J21.24	ENSG00000229213	-2063	40261515	40261668	-	768	763	TRUE	0.196782	11.3095	0.0811981	1	FALSE	-0.430694	11.3095	2.0911e-06	0.0238239	FALSE	0.944214	11.3095	9.9964e-36	1.34362e-31	TRUE	-0.433431	11.3095	1.92395e-05	0.218234	FALSE	-0.102553	11.3095	0.565241	1	FALSE	-0.637398	11.3095	1.00838e-09	1.22427e-05	FALSE	-0.286113	11.3095	0.0375481	1	FALSE
1	40281891	40284011	RP1-118J21.24	ENSG00000229213	-20222	40261515	40261668	-	768	146	TRUE	0.234816	6.86976	0.0372771	1	FALSE	0.0150769	6.86978	0.829545	1	FALSE	0.537209	6.86977	2.80048e-11	3.6283e-07	FALSE	-0.132298	6.86977	0.169142	1	FALSE	-0.0854376	6.86977	0.702334	1	FALSE	-0.97938	6.86978	5.279e-20	6.85531e-16	TRUE	-0.159328	6.86973	0.238523	1	FALSE
1	40289357	40293174	TRIT1	ENSG00000043514	13548	40306723	40349163	-	768	2	FALSE	-0.14041	5.12045	0.378607	1	FALSE	0.212207	5.12046	0.0842738	1	FALSE	0.231048	5.12045	0.0358151	1	FALSE	-0.331086	5.12045	0.022298	1	FALSE	-0.390972	5.12045	0.0867579	1	FALSE	-0.044224	5.12046	0.74044	1	FALSE	0.000689261	5.12044	1	1	FALSE
1	40402076	40402702	Y_RNA	ENSG00000207356	7859	40410562	40410670	-	768	0	FALSE	-0.048361	4.14038	0.949902	1	FALSE	0.0938582	4.14039	0.539051	1	FALSE	-0.180786	4.14038	0.332165	1	FALSE	-0.257325	4.14039	0.405452	1	FALSE	0.24587	4.14039	0.729578	1	FALSE	0.246586	4.14039	0.1547	1	FALSE	0.110451	4.14037	0.675017	1	FALSE
1	40419946	40420301	MFSD2A	ENSG00000168389	-500	40420802	40435638	+	768	23	FALSE	0.410351	4.65154	0.0141076	1	FALSE	0.0494585	4.65157	0.706392	1	FALSE	0.0828895	4.65155	0.527829	1	FALSE	-0.309053	4.65156	0.0332416	1	FALSE	-0.34443	4.65155	0.23107	1	FALSE	-0.201545	4.65157	0.313914	1	FALSE	0.154612	4.65147	0.541766	1	FALSE
1	40466873	40471025	MFSD2A	ENSG00000168389	31234	40429883	40435638	+	768	0	FALSE	0.0974078	4.65926	0.787613	1	FALSE	0.0132113	4.65927	1	1	FALSE	-0.847075	4.65926	6.10185e-07	0.0074168	FALSE	-0.21213	4.65926	0.268673	1	FALSE	-0.625529	4.65926	0.0356647	1	FALSE	1.09052	4.65927	2.10376e-12	2.62507e-08	FALSE	-0.0957545	4.65926	0.684343	1	FALSE
1	40504093	40505404	CAP1	ENSG00000131236	-500	40505905	40538321	+	768	446	TRUE	0.0834985	6.95189	0.485136	1	FALSE	0.154879	6.95193	0.0873606	1	FALSE	-0.141598	6.9519	0.139274	1	FALSE	-0.0475903	6.95192	0.633737	1	FALSE	-0.0885214	6.95191	0.62988	1	FALSE	-0.0787509	6.95194	0.470681	1	FALSE	0.129153	6.95179	0.364059	1	FALSE
1	40618747	40619754	RLF	ENSG00000117000	-7290	40627045	40706593	+	768	0	FALSE	-0.074876	4.22036	0.819005	1	FALSE	-0.274613	4.22035	0.167261	1	FALSE	-0.102167	4.22035	0.775759	1	FALSE	-0.061265	4.22035	0.730614	1	FALSE	0.0587638	4.22035	0.885289	1	FALSE	0.200734	4.22034	0.664624	1	FALSE	0.54134	4.22038	0.0108892	1	FALSE
1	40626298	40626544	RLF	ENSG00000117000	-500	40627045	40706593	+	768	122	TRUE	0.307298	4.80192	0.0419333	1	FALSE	-0.562235	4.80198	0.000172156	1	FALSE	-0.129452	4.80194	0.354447	1	FALSE	0.301937	4.80196	0.0202048	1	FALSE	-0.044869	4.80196	0.701564	1	FALSE	0.122769	4.80199	0.473524	1	FALSE	0.129159	4.80179	0.602336	1	FALSE
1	40804348	40805368	RP1-228H13.1	ENSG00000227311	-5117	40798748	40799230	-	768	7	FALSE	-0.818201	4.31883	0.035571	1	FALSE	-0.706846	4.31881	0.00525847	1	FALSE	-0.378963	4.31882	0.148388	1	FALSE	-1.0263	4.31882	0.00060163	1	FALSE	0.50256	4.31882	0.237009	1	FALSE	1.75838	4.31881	3.15255e-12	3.92776e-08	FALSE	-0.0492098	4.31888	1	1	FALSE
1	40809757	40810021	SMAP2	ENSG00000084070	-500	40810522	40879912	+	768	17	FALSE	-0.657219	4.19952	0.0201388	1	FALSE	-0.535766	4.19952	0.022384	1	FALSE	-0.15783	4.19952	0.59026	1	FALSE	-0.120366	4.19952	0.834408	1	FALSE	0.235069	4.19952	0.529668	1	FALSE	1.0065	4.19952	2.00399e-05	0.217734	FALSE	0.0919432	4.19952	0.753053	1	FALSE
1	40996677	40996732	ZNF684	ENSG00000117010	-500	40997233	41013841	+	768	66	TRUE	1.00723	4.34705	4.81352e-08	0.000599187	TRUE	-0.563489	4.3471	0.0164993	1	FALSE	-0.0417017	4.34707	1	1	FALSE	-0.361443	4.34709	0.121729	1	FALSE	0.733595	4.34708	0.0149645	1	FALSE	-0.279333	4.34711	0.237773	1	FALSE	-0.298352	4.34692	0.17348	1	FALSE
1	41824964	41827093	FOXO6	ENSG00000204060	-500	41827594	41849262	+	768	1	FALSE	0.783157	4.23447	0.000194767	1	FALSE	0.090169	4.23447	0.810743	1	FALSE	-0.259223	4.23447	0.309113	1	FALSE	-0.0503282	4.23447	0.658441	1	FALSE	-0.0231422	4.23447	0.875482	1	FALSE	-0.390192	4.23447	0.147455	1	FALSE	-0.216387	4.23448	0.482822	1	FALSE
1	42502097	42502157	HIVEP3	ENSG00000127124	-500	42312862	42501596	-	768	94	TRUE	1.86166	4.32948	8.74024e-24	1.16909e-19	TRUE	-0.211724	4.3295	0.297237	1	FALSE	-0.0694986	4.32949	0.87766	1	FALSE	-1.23151	4.3295	9.99072e-07	0.01189	FALSE	-0.357738	4.32949	0.455749	1	FALSE	-0.753612	4.32951	0.00262709	1	FALSE	-0.390015	4.32943	0.40956	1	FALSE
1	42823371	42825726	RP11-223A3.1	ENSG00000227527	-19323	42801057	42804047	-	768	0	FALSE	0.780505	4.19401	0.00153097	1	FALSE	-0.304505	4.194	0.172498	1	FALSE	0.0553143	4.19401	0.853714	1	FALSE	-0.660955	4.19401	0.009053	1	FALSE	-0.94508	4.19401	0.0475915	1	FALSE	0.451352	4.194	0.0729236	1	FALSE	-0.123171	4.19403	1	1	FALSE
1	43834197	43834818	ELOVL1	ENSG00000066322	-500	43829442	43833696	-	768	546	TRUE	0.15527	6.60831	0.219533	1	FALSE	-0.87744	6.60839	5.77501e-20	7.67499e-16	TRUE	-0.0906055	6.60834	0.388512	1	FALSE	0.611711	6.60836	4.46235e-11	5.70332e-07	FALSE	1.10604	6.60835	3.38263e-15	4.45053e-11	TRUE	-0.456212	6.6084	2.36863e-05	0.256617	FALSE	-0.0385904	6.60811	0.850465	1	FALSE
1	44110910	44112251	KDM4A	ENSG00000066135	-3577	44115829	44171186	+	768	1	FALSE	0.636199	4.24817	0.00567526	1	FALSE	-0.241533	4.2482	0.419589	1	FALSE	-0.0827008	4.24818	0.923693	1	FALSE	-0.125316	4.24819	0.490257	1	FALSE	0.0687502	4.24819	1	1	FALSE	0.0759765	4.2482	0.77166	1	FALSE	-0.352401	4.24809	0.226906	1	FALSE
1	44114557	44115328	KDM4A	ENSG00000066135	-500	44115829	44171186	+	768	127	TRUE	0.524	5.59128	0.002756	1	FALSE	-0.806638	5.59143	4.00136e-07	0.00468079	TRUE	-0.396182	5.59133	0.00804067	1	FALSE	0.198651	5.59138	0.209153	1	FALSE	0.386921	5.59137	0.135899	1	FALSE	0.421147	5.59145	0.00679479	1	FALSE	0.05769	5.59092	0.804994	1	FALSE
1	44497640	44499185	SLC6A9	ENSG00000196517	-500	44474187	44497139	-	768	36	FALSE	0.689275	5.5306	2.006e-06	0.024068	FALSE	-0.246718	5.53072	0.103509	1	FALSE	0.192026	5.53064	0.0727466	1	FALSE	0.207791	5.53068	0.142472	1	FALSE	0.343	5.53067	0.139537	1	FALSE	-1.31	5.53074	2.15816e-17	2.77324e-13	FALSE	-0.12054	5.5303	0.473879	1	FALSE
1	44678129	44678626	DMAP1	ENSG00000178028	-500	44679127	44686353	+	768	23	FALSE	0.683759	4.63782	7.15261e-05	0.805313	FALSE	-0.355278	4.63785	0.0232158	1	FALSE	0.455619	4.63783	0.0011729	1	FALSE	-0.385178	4.63784	0.0267764	1	FALSE	-0.289193	4.63784	0.416141	1	FALSE	-0.335965	4.63785	0.0690816	1	FALSE	-0.193902	4.63776	0.593936	1	FALSE
1	45197343	45197973	RNU5D-1	ENSG00000200169	-500	45196727	45196842	-	768	53	TRUE	0.491546	4.74318	0.00612113	1	FALSE	-0.514841	4.74321	0.000421694	1	FALSE	-0.119758	4.74319	0.436705	1	FALSE	-0.36021	4.7432	0.0331664	1	FALSE	-0.268057	4.7432	0.485883	1	FALSE	0.920233	4.74322	1.05987e-10	1.30173e-06	TRUE	-0.829019	4.74309	0.0023481	1	FALSE
1	45203759	45204648	KIF2C	ENSG00000142945	-841	45205490	45223643	+	768	53	TRUE	-0.443614	6.02504	0.230954	1	FALSE	0.255993	6.02504	0.299678	1	FALSE	-0.155811	6.02504	0.563571	1	FALSE	0.822486	6.02504	0.00184798	1	FALSE	-0.880505	6.02504	0.114317	1	FALSE	-0.238394	6.02504	0.452623	1	FALSE	-0.896468	6.02505	0.0418786	1	FALSE
1	45204691	45204989	KIF2C	ENSG00000142945	-500	45205490	45223643	+	768	81	TRUE	0.0573046	5.20288	0.845969	1	FALSE	-0.190033	5.20293	0.440292	1	FALSE	-0.337486	5.2029	0.133135	1	FALSE	0.661216	5.20291	0.00332	1	FALSE	0.00156919	5.20291	1	1	FALSE	0.0286673	5.20294	0.884881	1	FALSE	-0.427138	5.20275	0.258482	1	FALSE
1	45264074	45265396	PLK3	ENSG00000173846	-500	45265897	45271662	+	768	7	FALSE	0.34251	4.8126	0.038521	1	FALSE	-0.741514	4.81264	4.59053e-07	0.00535761	FALSE	0.233084	4.81261	0.0504089	1	FALSE	-0.448171	4.81262	0.00712833	1	FALSE	0.41787	4.81262	0.134295	1	FALSE	0.49763	4.81264	0.000616388	1	FALSE	-0.244221	4.8125	0.210744	1	FALSE
1	45772382	45772657	ZSWIM5	ENSG00000162415	-500	45553747	45771881	-	768	27	FALSE	0.274755	4.42268	0.20104	1	FALSE	-0.512836	4.42271	0.00548311	1	FALSE	-0.0833522	4.42269	0.633965	1	FALSE	0.714591	4.4227	5.86246e-06	0.0679518	FALSE	-0.0586156	4.4227	0.865152	1	FALSE	-0.33152	4.42272	0.0877536	1	FALSE	-0.281626	4.42261	0.368446	1	FALSE
1	46015664	46015714	AKR1A1	ENSG00000117448	-500	46016215	46035721	+	768	47	TRUE	0.146559	4.18131	0.718218	1	FALSE	-0.355596	4.18134	0.212673	1	FALSE	-0.438516	4.18132	0.0322806	1	FALSE	0.131556	4.18133	0.704024	1	FALSE	0.871919	4.18133	0.0077301	1	FALSE	0.35159	4.18135	0.0421616	1	FALSE	-0.360208	4.18125	0.349501	1	FALSE
1	46047585	46049017	NASP	ENSG00000132780	-500	46049518	46080803	+	768	634	TRUE	-0.175337	7.64451	0.100807	1	FALSE	-0.52316	7.64452	9.83475e-11	1.23996e-06	FALSE	0.369994	7.64451	4.39901e-07	0.00537031	FALSE	0.626134	7.64452	4.72489e-15	6.19764e-11	FALSE	0.175155	7.64451	0.200949	1	FALSE	-0.499271	7.64452	4.32219e-08	0.000509715	FALSE	-0.398011	7.64448	0.00123113	1	FALSE
1	46216823	46217243	IPP	ENSG00000197429	-500	46159996	46216322	-	768	14	FALSE	0.405279	4.36788	0.0403061	1	FALSE	-0.529008	4.36792	0.00486152	1	FALSE	-0.218963	4.3679	0.367849	1	FALSE	0.0295302	4.36791	0.98374	1	FALSE	0.391931	4.36791	0.234542	1	FALSE	0.19903	4.36793	0.141813	1	FALSE	0.130779	4.36779	0.816481	1	FALSE
1	46712075	46712859	RAD54L	ENSG00000085999	-500	46713360	46727030	+	768	30	FALSE	-0.170104	4.9575	0.428373	1	FALSE	-0.799048	4.95757	6.47589e-08	0.000773998	FALSE	-0.292467	4.95752	0.049626	1	FALSE	0.273055	4.95755	0.0687928	1	FALSE	-0.541946	4.95754	0.0355244	1	FALSE	1.10621	4.95758	5.8142e-16	7.41427e-12	FALSE	-0.296137	4.95731	0.154637	1	FALSE
1	46790342	46792614	UQCRH	ENSG00000173660	7893	46775593	46782448	+	768	449	TRUE	-0.934513	7.74271	1.68445e-07	0.00207457	TRUE	0.00248011	7.74272	0.986353	1	FALSE	-0.341783	7.74271	0.00684683	1	FALSE	-0.951279	7.74272	1.60404e-10	2.03841e-06	TRUE	-1.19404	7.74272	8.61877e-06	0.104408	FALSE	1.53762	7.74272	4.38626e-39	5.84952e-35	TRUE	-0.0709655	7.74269	0.729023	1	FALSE
1	46796082	46800117	NSUN4	ENSG00000117481	-5731	46805849	46827863	+	768	277	TRUE	-0.611621	7.72045	2.06841e-05	0.239233	FALSE	0.0985952	7.72047	0.343417	1	FALSE	-0.109625	7.72046	0.289097	1	FALSE	-0.739883	7.72046	6.75421e-10	8.52246e-06	TRUE	-0.652958	7.72046	0.00214934	1	FALSE	1.09524	7.72047	9.64487e-27	1.27052e-22	TRUE	-0.250409	7.72041	0.118096	1	FALSE
1	46805235	46805348	NSUN4	ENSG00000117481	-500	46805849	46827863	+	768	49	TRUE	0.122403	4.30952	0.812983	1	FALSE	-0.679468	4.30956	0.000448856	1	FALSE	-0.518616	4.30953	0.00598523	1	FALSE	0.48081	4.30955	0.0037092	1	FALSE	0.205413	4.30954	0.706258	1	FALSE	0.538657	4.30957	0.00983557	1	FALSE	-0.0227403	4.30941	0.853354	1	FALSE
1	47083064	47083682	MOB3C	ENSG00000142961	-500	47073387	47082563	-	768	93	TRUE	0.209003	4.99237	0.299829	1	FALSE	-0.570106	4.99256	0.000483966	1	FALSE	-0.705918	4.99244	1.27846e-05	0.148544	FALSE	0.58854	4.9925	0.000131739	1	FALSE	0.375299	4.99248	0.173058	1	FALSE	0.357569	4.99259	0.0343217	1	FALSE	0.0366513	4.9919	0.873921	1	FALSE
1	47185325	47185719	EFCAB14	ENSG00000159658	-500	47124366	47184824	-	768	2	FALSE	0.451329	4.16784	0.0503544	1	FALSE	-0.388007	4.16785	0.04298	1	FALSE	-0.121429	4.16785	0.664658	1	FALSE	0.0107242	4.16785	1	1	FALSE	-0.324272	4.16785	0.494613	1	FALSE	0.362034	4.16785	0.0488527	1	FALSE	-0.122008	4.16783	0.754618	1	FALSE
1	47780320	47780950	STIL	ENSG00000123473	-500	47726091	47779819	-	768	126	TRUE	0.189819	5.23394	0.142995	1	FALSE	-0.120339	5.23401	0.344588	1	FALSE	-0.263927	5.23397	0.0187775	1	FALSE	0.158877	5.23399	0.172406	1	FALSE	0.522091	5.23398	0.00430058	1	FALSE	-0.15482	5.23402	0.22166	1	FALSE	0.0989758	5.23378	0.607618	1	FALSE
1	47798375	47798968	CMPK1	ENSG00000162368	-500	47799469	47844511	+	768	220	TRUE	0.55239	5.52625	1.16317e-05	0.13601	FALSE	-0.594431	5.52638	1.16058e-07	0.00137819	FALSE	-0.254558	5.5263	0.0227066	1	FALSE	0.219834	5.52634	0.0619386	1	FALSE	0.453065	5.52632	0.0135839	1	FALSE	0.132847	5.52639	0.142471	1	FALSE	-0.199793	5.52596	0.186305	1	FALSE
1	48938346	48938518	SPATA6	ENSG00000132122	-500	48761044	48937845	-	768	6	FALSE	0.807081	4.16089	0.000495285	1	FALSE	-0.352498	4.1609	0.11374	1	FALSE	0.0963499	4.1609	0.657945	1	FALSE	-0.223563	4.1609	0.444267	1	FALSE	-0.211218	4.1609	0.660532	1	FALSE	-0.139406	4.1609	0.547626	1	FALSE	-0.150483	4.16087	0.982993	1	FALSE
1	50731306	50732426	RP11-567C20.3	ENSG00000233407	-42506	50671756	50688799	-	768	3	FALSE	-0.245341	4.35226	0.667126	1	FALSE	2.41891	4.3523	2.15306e-21	2.8668e-17	FALSE	-1.11887	4.35227	0.000758354	1	FALSE	-1.32979	4.35229	0.000484881	1	FALSE	-1.53973	4.35228	0.0455529	1	FALSE	-1.3737	4.35231	0.000617077	1	FALSE	-1.19999	4.35215	0.0410302	1	FALSE
1	50890208	50891217	DMRTA2	ENSG00000142700	-1035	50883222	50889172	-	768	14	FALSE	0.157269	4.45603	0.525236	1	FALSE	-0.229994	4.45604	0.308769	1	FALSE	0.425836	4.45603	0.0430813	1	FALSE	-0.745616	4.45604	0.00614884	1	FALSE	-0.948099	4.45604	0.0992645	1	FALSE	0.563145	4.45605	0.0157563	1	FALSE	-0.356101	4.45599	0.296096	1	FALSE
1	51445306	51445659	CDKN2C	ENSG00000123080	5000	51434367	51440305	+	768	81	TRUE	1.28974	5.06948	2.89363e-05	0.332305	FALSE	-1.43344	5.06966	1.87423e-06	0.0214037	FALSE	1.22949	5.06955	3.98893e-07	0.00487886	TRUE	-1.68818	5.0696	1.14781e-06	0.0136291	FALSE	-1.2749	5.06958	0.0383562	1	FALSE	-0.39092	5.06968	0.264281	1	FALSE	-0.445881	5.06905	0.358167	1	FALSE
1	51465698	51466887	CDKN2C	ENSG00000123080	25392	51434367	51440305	+	768	7	FALSE	1.62299	4.59522	4.13314e-10	5.29e-06	FALSE	-0.95314	4.59534	0.000325573	1	FALSE	0.996708	4.59527	5.31006e-06	0.0625896	FALSE	-1.10146	4.5953	0.000183442	1	FALSE	-0.850123	4.59529	0.139105	1	FALSE	-1.6578	4.59536	5.05199e-07	0.00578604	FALSE	-0.703661	4.59494	0.106415	1	FALSE
1	51565724	51566879	C1orf185	ENSG00000204006	-1026	51567906	51613752	+	768	0	FALSE	1.02648	4.1651	3.47256e-05	0.397227	FALSE	-0.550975	4.16512	0.0191208	1	FALSE	-0.367736	4.16511	0.1337	1	FALSE	-0.000233635	4.16511	0.954761	1	FALSE	0.675783	4.16511	0.0954021	1	FALSE	-0.425826	4.16512	0.0638597	1	FALSE	-0.000258503	4.16506	0.816792	1	FALSE
1	51701269	51701442	RNF11	ENSG00000123091	-500	51701943	51739127	+	768	562	TRUE	-0.00518982	6.1519	0.968328	1	FALSE	-0.0359034	6.15191	0.787474	1	FALSE	-1.1275	6.15191	5.18334e-21	6.93582e-17	TRUE	0.835507	6.15191	1.89414e-12	2.44951e-08	TRUE	-0.706814	6.15191	0.00302543	1	FALSE	0.376619	6.15191	0.00383888	1	FALSE	0.0301061	6.15188	0.892186	1	FALSE
1	52344978	52345732	NRD1	ENSG00000078618	-500	52254863	52344477	-	768	170	TRUE	-0.187643	5.79107	0.222811	1	FALSE	0.413567	5.79109	0.000115519	1	FALSE	-0.20152	5.79107	0.0723415	1	FALSE	-0.345706	5.79108	0.00730811	1	FALSE	-0.243165	5.79108	0.291111	1	FALSE	0.251068	5.79109	0.0467348	1	FALSE	-0.0222287	5.79101	0.887915	1	FALSE
1	52353123	52354348	NRD1	ENSG00000078618	-8645	52254863	52344477	-	768	7	FALSE	-0.135528	4.54174	0.289371	1	FALSE	-0.143147	4.54174	0.294984	1	FALSE	-0.165737	4.54174	0.352528	1	FALSE	-0.136045	4.54174	0.615365	1	FALSE	-0.51883	4.54174	0.123491	1	FALSE	0.724094	4.54174	2.88551e-06	0.032286	FALSE	-0.0186341	4.54175	0.800408	1	FALSE
1	52456937	52457150	RAB3B	ENSG00000169213	-500	52373628	52456436	-	768	1	FALSE	0.0882222	4.12406	1	1	FALSE	-0.013386	4.12406	1	1	FALSE	-0.0405326	4.12406	1	1	FALSE	0.00996935	4.12406	0.888372	1	FALSE	0.29437	4.12406	0.748736	1	FALSE	-0.064998	4.12406	1	1	FALSE	-0.168748	4.12406	0.925804	1	FALSE
1	52561670	52562237	BTF3L4	ENSG00000134717	5281	52521797	52556388	+	768	120	TRUE	-0.308969	5.10198	0.11189	1	FALSE	0.0789197	5.10197	0.675578	1	FALSE	-0.380562	5.10198	0.0038718	1	FALSE	-0.500859	5.10197	0.000787937	1	FALSE	-0.921787	5.10197	0.00194893	1	FALSE	1.08241	5.10197	2.5575e-17	3.28511e-13	TRUE	-0.0164774	5.10202	0.995665	1	FALSE
1	52567879	52568890	BTF3L4	ENSG00000134717	11490	52521797	52556388	+	768	8	FALSE	-0.235514	4.76451	0.400825	1	FALSE	0.00187841	4.76451	0.925465	1	FALSE	0.65604	4.76451	4.37075e-05	0.495468	FALSE	-0.689566	4.76451	0.00120862	1	FALSE	-0.866764	4.76451	0.0548362	1	FALSE	0.309767	4.7645	0.131157	1	FALSE	-0.634576	4.76451	0.0326252	1	FALSE
1	52580423	52581250	BTF3L4	ENSG00000134717	24034	52521797	52556388	+	768	1	FALSE	-0.405396	4.41496	0.115825	1	FALSE	0.101025	4.41496	0.785359	1	FALSE	0.0112985	4.41496	0.942507	1	FALSE	-0.456521	4.41496	0.0289707	1	FALSE	-1.52473	4.41496	0.000442613	1	FALSE	0.9661	4.41496	6.36556e-08	0.000746998	FALSE	-0.385526	4.41495	0.149357	1	FALSE
1	52604951	52607545	ZFYVE9	ENSG00000157077	-500	52608046	52729719	+	768	5	FALSE	-0.194145	4.99542	0.340002	1	FALSE	-0.426722	4.99547	0.0019848	1	FALSE	0.0253157	4.99544	0.917942	1	FALSE	0.154729	4.99545	0.226533	1	FALSE	-0.353156	4.99545	0.2817	1	FALSE	0.626313	4.99547	1.39115e-05	0.152191	FALSE	-0.323298	4.99532	0.163004	1	FALSE
1	52832366	52832801	CC2D1B	ENSG00000154222	-500	52816269	52831865	-	768	153	TRUE	-0.337505	5.20598	0.0202264	1	FALSE	0.198873	5.206	0.0494096	1	FALSE	0.0543358	5.20598	0.492021	1	FALSE	0.279518	5.20599	0.02439	1	FALSE	-0.0811215	5.20599	1	1	FALSE	-0.265131	5.206	0.0251001	1	FALSE	-0.28011	5.20591	0.0908456	1	FALSE
1	53019660	53019989	RP11-25O10.2	ENSG00000272371	-500	53020490	53020945	+	768	123	TRUE	0.279116	4.69216	0.164423	1	FALSE	-0.353981	4.69225	0.0317946	1	FALSE	-0.191312	4.69219	0.369946	1	FALSE	0.0759722	4.69222	0.661301	1	FALSE	1.04016	4.69221	4.40185e-07	0.00548251	TRUE	-0.122551	4.69226	0.320963	1	FALSE	-0.227874	4.69195	0.324312	1	FALSE
1	53066413	53067543	GPX7	ENSG00000116157	-500	53068044	53074723	+	768	93	TRUE	-0.188638	5.10372	0.188154	1	FALSE	-0.236657	5.10386	0.0794955	1	FALSE	-0.092092	5.10377	0.691419	1	FALSE	0.449553	5.10382	0.000278747	1	FALSE	0.397532	5.1038	0.0770603	1	FALSE	-0.457137	5.10388	0.00319258	1	FALSE	0.343997	5.10337	0.0867051	1	FALSE
1	53094848	53095652	FAM159A	ENSG00000182183	-3363	53099016	53122737	+	768	669	TRUE	-0.887451	8.06407	5.30131e-10	6.77719e-06	TRUE	0.0603274	8.06409	0.538375	1	FALSE	0.0185089	8.06407	0.822893	1	FALSE	0.62193	8.06408	6.85868e-09	8.54179e-05	FALSE	0.306259	8.06408	0.0921984	1	FALSE	-0.680296	8.06409	3.37623e-08	0.00039907	FALSE	0.193612	8.06402	0.203095	1	FALSE
1	53095711	53098515	FAM159A	ENSG00000182183	-500	53099016	53122737	+	768	591	TRUE	-0.491414	8.48572	0.000984897	1	FALSE	-0.128245	8.48574	0.258936	1	FALSE	0.0614145	8.48573	0.537886	1	FALSE	0.730016	8.48573	6.75687e-11	8.62312e-07	TRUE	0.256508	8.48573	0.182286	1	FALSE	-0.802707	8.48575	8.16413e-10	9.92186e-06	TRUE	0.0852755	8.48565	0.594133	1	FALSE
1	53164539	53164691	SELRC1	ENSG00000162377	-500	53152508	53164038	-	768	21	FALSE	0.42824	4.37285	0.0676463	1	FALSE	-0.357402	4.37289	0.114931	1	FALSE	-0.580367	4.37286	0.00537129	1	FALSE	0.51924	4.37288	0.00558141	1	FALSE	0.290634	4.37287	0.54252	1	FALSE	-0.222949	4.3729	0.34234	1	FALSE	0.241226	4.37274	0.360784	1	FALSE
1	53168153	53169878	SELRC1	ENSG00000162377	-4114	53152508	53164038	-	768	56	TRUE	0.489186	5.717	0.000227943	1	FALSE	-0.678418	5.7171	8.14456e-09	9.93554e-05	FALSE	0.0106876	5.71704	0.714198	1	FALSE	0.209738	5.71707	0.0681242	1	FALSE	0.334371	5.71706	0.1172	1	FALSE	-0.193999	5.71712	0.112813	1	FALSE	0.148946	5.71676	0.311406	1	FALSE
1	54200378	54202396	GLIS1	ENSG00000174332	-500	53971910	54199877	-	768	5	FALSE	-0.668366	4.53768	0.112393	1	FALSE	0.61461	4.53764	0.0274754	1	FALSE	-0.87449	4.53766	0.00382743	1	FALSE	0.979588	4.53765	0.000856245	1	FALSE	-2.08689	4.53766	0.00262903	1	FALSE	0.0167662	4.53764	1	1	FALSE	-0.596144	4.53776	0.254968	1	FALSE
1	54204914	54205380	GLIS1	ENSG00000174332	-5036	53971910	54199877	-	768	0	FALSE	0.312317	4.128	0.328728	1	FALSE	0.145855	4.128	0.583938	1	FALSE	-0.107671	4.128	0.800835	1	FALSE	0.00887986	4.128	1	1	FALSE	-0.225384	4.128	1	1	FALSE	-0.2469	4.128	0.232664	1	FALSE	-0.0248488	4.12799	1	1	FALSE
1	54453160	54453941	HNRNPA3P12	ENSG00000219102	-11455	54440642	54441704	-	768	0	FALSE	-0.307855	4.22455	0.308937	1	FALSE	-0.0512324	4.22455	1	1	FALSE	0.103584	4.22455	0.723267	1	FALSE	-0.399353	4.22455	0.104659	1	FALSE	0.081241	4.22455	0.640967	1	FALSE	0.479948	4.22454	0.0324685	1	FALSE	-0.0231967	4.22457	0.924801	1	FALSE
1	54587193	54588093	TCEANC2	ENSG00000116205	9000	54519260	54578192	+	768	0	FALSE	0.0220577	4.1585	1	1	FALSE	-0.00765375	4.1585	1	1	FALSE	0.173457	4.1585	0.300884	1	FALSE	0.191754	4.1585	0.478325	1	FALSE	-0.119383	4.1585	1	1	FALSE	-0.340566	4.1585	0.180822	1	FALSE	-0.241258	4.15849	0.649166	1	FALSE
1	54952805	54955338	AC099796.1	ENSG00000265404	-15002	54970341	54970443	+	768	27	FALSE	0.93846	5.49337	2.08623e-07	0.00256252	FALSE	-1.61991	5.49361	1.46743e-19	1.94728e-15	FALSE	-0.498854	5.49346	0.00211991	1	FALSE	0.4204	5.49353	0.010158	1	FALSE	0.199946	5.49351	0.496678	1	FALSE	0.419459	5.49364	0.0143934	1	FALSE	0.114413	5.49281	0.58051	1	FALSE
1	55230688	55231080	PARS2	ENSG00000162396	-500	55222571	55230187	-	768	4	FALSE	0.426561	4.23416	0.0451431	1	FALSE	0.0632982	4.23416	0.805203	1	FALSE	-0.563236	4.23416	0.00675312	1	FALSE	0.202103	4.23416	0.233768	1	FALSE	-0.0754352	4.23416	0.860125	1	FALSE	-0.0429445	4.23416	0.840047	1	FALSE	0.128836	4.23417	1	1	FALSE
1	55267441	55267870	TTC22	ENSG00000006555	-500	55245385	55266940	-	768	45	TRUE	0.555948	4.70344	0.000695187	1	FALSE	-0.203047	4.7035	0.267595	1	FALSE	-0.473016	4.70346	0.00399203	1	FALSE	0.766896	4.70348	1.00949e-07	0.00122926	TRUE	0.679945	4.70347	0.00642578	1	FALSE	-1.16932	4.70351	9.35817e-10	1.13636e-05	TRUE	-0.263981	4.70329	0.159599	1	FALSE
1	55270416	55271235	C1orf177	ENSG00000162398	-500	55271736	55307925	+	768	4	FALSE	0.863326	4.28908	0.000273333	1	FALSE	-0.516579	4.2891	0.0169138	1	FALSE	0.252367	4.28908	0.143427	1	FALSE	-0.0701909	4.28909	1	1	FALSE	0.580642	4.28909	0.128824	1	FALSE	-0.747782	4.2891	0.0028205	1	FALSE	-0.411606	4.28902	0.21118	1	FALSE
1	55416120	55416624	TMEM61	ENSG00000143001	-29840	55446465	55457966	+	768	0	FALSE	-0.066571	4.11919	1	1	FALSE	0.108258	4.11919	1	1	FALSE	0.00641847	4.11919	1	1	FALSE	-0.0708532	4.11919	0.982748	1	FALSE	-0.0625058	4.11919	1	1	FALSE	0.0486576	4.11919	0.78747	1	FALSE	-0.0637995	4.11919	1	1	FALSE
1	55681287	55682462	USP24	ENSG00000162402	-500	55532032	55680786	-	768	738	TRUE	-0.0138183	8.65331	0.890077	1	FALSE	-0.243026	8.65332	0.000608778	1	FALSE	-0.466553	8.65331	5.63785e-12	7.34105e-08	FALSE	0.273473	8.65331	0.000270122	1	FALSE	0.13525	8.65331	0.265202	1	FALSE	0.488673	8.65332	3.46313e-11	4.27419e-07	FALSE	-0.0319365	8.6533	0.76357	1	FALSE
1	55719896	55727197	RP11-101C11.1	ENSG00000231090	20045	55683534	55699850	+	768	2	FALSE	1.06286	4.63505	2.5426e-06	0.0303993	FALSE	-0.210928	4.6352	0.41287	1	FALSE	-0.992418	4.6351	2.92955e-06	0.0348294	FALSE	0.293868	4.63515	0.205374	1	FALSE	-1.20675	4.63514	0.0090216	1	FALSE	0.0528362	4.63522	0.827305	1	FALSE	0.26637	4.63468	0.363688	1	FALSE
1	55728052	55729950	RP11-101C11.1	ENSG00000231090	28201	55683534	55699850	+	768	0	FALSE	-0.461131	4.21828	0.129473	1	FALSE	-0.188243	4.21829	0.289291	1	FALSE	-0.157458	4.21829	0.595545	1	FALSE	0.00433582	4.21829	1	1	FALSE	0.433183	4.21829	0.206313	1	FALSE	0.717478	4.2183	0.000951007	1	FALSE	-0.596342	4.21825	0.0642184	1	FALSE
1	55742603	55743595	RP11-101C11.1	ENSG00000231090	42752	55683534	55699850	+	768	0	FALSE	-0.0153839	4.13013	1	1	FALSE	0.26331	4.13014	0.113679	1	FALSE	-0.234887	4.13014	0.220179	1	FALSE	0.0782207	4.13014	0.809073	1	FALSE	-0.0148516	4.13014	1	1	FALSE	-0.171433	4.13014	0.609949	1	FALSE	0.0986715	4.13012	0.703564	1	FALSE
1	55753245	55754493	RP11-101C11.1	ENSG00000231090	53394	55683534	55699850	+	768	276	TRUE	0.15778	7.44095	0.568449	1	FALSE	1.17815	7.44091	5.71743e-08	0.000684548	TRUE	-1.36101	7.44094	5.51435e-08	0.000686592	TRUE	-0.904923	7.44092	0.00150468	1	FALSE	-0.553535	7.44093	0.27456	1	FALSE	-0.66851	7.44091	0.0204678	1	FALSE	1.1519	7.44104	0.000200556	1	FALSE
1	55828511	55829216	GOT2P1	ENSG00000231900	-3922	55833139	55834447	+	768	1	FALSE	0.192268	4.13479	0.305445	1	FALSE	0.235022	4.13479	0.189446	1	FALSE	0.10652	4.13479	0.522605	1	FALSE	-0.327773	4.13479	0.0755574	1	FALSE	0.350306	4.13479	0.466265	1	FALSE	-0.320377	4.13479	0.0927417	1	FALSE	-0.298898	4.13479	0.413324	1	FALSE
1	56001922	56002589	RP11-466L17.1	ENSG00000234810	-44120	56046710	56200675	+	768	0	FALSE	0.0394405	4.12107	0.879225	1	FALSE	0.0724426	4.12107	0.74939	1	FALSE	0.0489059	4.12107	0.646628	1	FALSE	-0.105024	4.12107	0.822813	1	FALSE	-0.0927787	4.12107	1	1	FALSE	0.0147383	4.12107	1	1	FALSE	-0.094679	4.12107	1	1	FALSE
1	56761834	56762393	RP11-504A18.1	ENSG00000260971	-37590	56713966	56724243	-	768	1	FALSE	-0.0432923	4.13319	1	1	FALSE	0.00567236	4.1332	0.996318	1	FALSE	0.0272124	4.1332	1	1	FALSE	0.0475791	4.1332	0.669932	1	FALSE	-0.0412796	4.1332	1	1	FALSE	0.0099476	4.1332	1	1	FALSE	-0.101202	4.13319	1	1	FALSE
1	59012975	59013077	OMA1	ENSG00000162600	-500	58999975	59012474	-	768	395	TRUE	0.154874	5.03545	0.200658	1	FALSE	-0.0536882	5.03548	0.512222	1	FALSE	-0.395691	5.03546	0.00168569	1	FALSE	0.404729	5.03547	0.000496729	1	FALSE	-0.131459	5.03547	0.676828	1	FALSE	0.199602	5.03549	0.148256	1	FALSE	-0.371271	5.03538	0.0190518	1	FALSE
1	59166265	59166273	MYSM1	ENSG00000162601	-500	59120411	59165764	-	768	41	TRUE	0.148041	4.12709	0.685056	1	FALSE	0.164041	4.1271	0.179953	1	FALSE	-0.109001	4.12709	0.487668	1	FALSE	-0.0549801	4.12709	0.790824	1	FALSE	0.240594	4.12709	0.872561	1	FALSE	-0.126653	4.1271	0.858831	1	FALSE	-0.225761	4.12708	0.7162	1	FALSE
1	59197211	59197830	Y_RNA	ENSG00000222168	9166	59187951	59188044	+	768	1	FALSE	0.138316	4.12245	0.999067	1	FALSE	-0.0429694	4.12245	1	1	FALSE	-0.128441	4.12245	0.326212	1	FALSE	-0.00359604	4.12245	0.638526	1	FALSE	-0.105388	4.12245	1	1	FALSE	-0.115938	4.12245	0.625708	1	FALSE	0.418244	4.12246	0.0309658	1	FALSE
1	59238574	59239983	JUN	ENSG00000177606	6481	59246465	59249785	-	768	4	FALSE	0.0354162	4.36762	1	1	FALSE	-0.0452584	4.36763	0.899007	1	FALSE	-0.0310878	4.36762	0.925724	1	FALSE	0.195279	4.36763	0.320891	1	FALSE	0.331391	4.36762	0.344704	1	FALSE	-0.101543	4.36763	0.627709	1	FALSE	-0.399564	4.36761	0.303397	1	FALSE
1	59250286	59250322	RP4-794H19.2	ENSG00000234807	-500	59250823	59365384	+	768	754	TRUE	-0.0625223	8.66506	0.730297	1	FALSE	-0.158886	8.66506	0.189811	1	FALSE	-0.736835	8.66506	8.96609e-10	1.14622e-05	TRUE	0.63224	8.66506	3.73114e-07	0.0044826	FALSE	-0.422204	8.66506	0.0779641	1	FALSE	0.34944	8.66506	0.0077395	1	FALSE	0.169527	8.66507	0.317956	1	FALSE
1	59370385	59370890	RP4-794H19.2	ENSG00000234807	5000	59250823	59365384	+	768	48	TRUE	0.695291	4.68115	0.000496633	1	FALSE	-0.591547	4.68129	0.00304869	1	FALSE	-0.273341	4.6812	0.174126	1	FALSE	-0.178135	4.68125	0.374862	1	FALSE	1.04379	4.68123	5.84518e-05	0.688446	FALSE	-0.288916	4.68131	0.148187	1	FALSE	0.308052	4.68083	0.218098	1	FALSE
1	59387988	59388526	RP4-794H19.2	ENSG00000234807	22603	59250823	59365384	+	768	1	FALSE	0.306711	4.13634	0.169635	1	FALSE	-0.244985	4.13635	0.249237	1	FALSE	-0.136286	4.13634	0.513909	1	FALSE	-0.0401354	4.13634	0.983222	1	FALSE	0.75081	4.13634	0.00862346	1	FALSE	-0.282869	4.13635	0.289868	1	FALSE	0.148523	4.13632	1	1	FALSE
1	59431236	59436090	PHBP3	ENSG00000228121	-29257	59465348	59466166	+	768	5	FALSE	-0.00275919	4.97074	0.859432	1	FALSE	0.227723	4.97077	0.057433	1	FALSE	-0.140806	4.97075	0.457055	1	FALSE	-0.251845	4.97076	0.0839215	1	FALSE	0.786057	4.97076	0.000986799	1	FALSE	-0.438764	4.97077	0.00876777	1	FALSE	0.22254	4.97066	0.304787	1	FALSE
1	59462103	59463546	PHBP3	ENSG00000228121	-1801	59465348	59466166	+	768	0	FALSE	0.306168	4.14255	0.160255	1	FALSE	-0.40609	4.14255	0.0274989	1	FALSE	0.098566	4.14255	0.854311	1	FALSE	0.11886	4.14255	0.541184	1	FALSE	0.231413	4.14255	0.339219	1	FALSE	-0.0570209	4.14256	0.777834	1	FALSE	-0.2492	4.14254	0.643451	1	FALSE
1	59472955	59474981	PHBP3	ENSG00000228121	6788	59465348	59466166	+	768	6	FALSE	-0.204765	4.65131	0.526006	1	FALSE	-1.67977	4.65138	5.56962e-10	6.94364e-06	FALSE	0.989369	4.65134	2.80717e-06	0.0333997	FALSE	0.380499	4.65136	0.121428	1	FALSE	1.34525	4.65135	0.000274152	1	FALSE	-1.1806	4.65139	7.92269e-05	0.835526	FALSE	-0.683634	4.65115	0.105226	1	FALSE
1	59477438	59481033	RP4-794H19.4	ENSG00000230812	-5025	59486059	59498735	+	768	10	FALSE	-0.118767	5.24522	0.705487	1	FALSE	-1.63096	5.24535	2.77139e-12	3.5496e-08	FALSE	0.736237	5.24527	9.83639e-05	1	FALSE	0.121978	5.24531	0.566245	1	FALSE	1.61298	5.2453	2.19771e-07	0.00275065	FALSE	-0.743297	5.24537	0.00401591	1	FALSE	-0.296532	5.24491	0.449212	1	FALSE
1	59481098	59482473	RP4-794H19.4	ENSG00000230812	-3585	59486059	59498735	+	768	0	FALSE	-0.487462	4.201	0.081162	1	FALSE	-0.575568	4.20103	0.0173313	1	FALSE	0.263598	4.20101	0.196346	1	FALSE	-0.244891	4.20102	0.306683	1	FALSE	1.09467	4.20102	0.000895225	1	FALSE	0.183614	4.20103	0.38392	1	FALSE	-0.00719554	4.20094	1	1	FALSE
1	59483235	59485558	RP4-794H19.4	ENSG00000230812	-500	59486059	59498735	+	768	0	FALSE	0.274527	4.29369	0.272237	1	FALSE	-1.00129	4.29377	2.48123e-05	0.269412	FALSE	-0.024409	4.29372	1	1	FALSE	-0.0678338	4.29375	0.787004	1	FALSE	1.06355	4.29374	0.00114457	1	FALSE	0.349409	4.29378	0.125687	1	FALSE	-0.251169	4.29349	0.573858	1	FALSE
1	59731957	59733300	RP11-467C18.1	ENSG00000270457	21674	59754975	59755312	-	768	1	FALSE	-0.355818	4.25627	0.21673	1	FALSE	-0.410588	4.25624	0.0411951	1	FALSE	-0.0907888	4.25626	0.763321	1	FALSE	0.235346	4.25625	0.369951	1	FALSE	-0.723792	4.25625	0.180176	1	FALSE	0.862707	4.25624	4.85387e-05	0.518102	FALSE	-0.386487	4.25632	0.39843	1	FALSE
1	59755922	59757034	RP11-467C18.1	ENSG00000270457	-609	59754975	59755312	-	768	283	TRUE	0.157325	6.31947	0.181716	1	FALSE	-0.76087	6.31948	4.57704e-13	5.8966e-09	TRUE	-0.00511111	6.31947	0.987984	1	FALSE	0.367968	6.31948	0.000499488	1	FALSE	0.224517	6.31947	0.20819	1	FALSE	0.225927	6.31948	0.0480529	1	FALSE	-0.0812335	6.31946	0.611386	1	FALSE
1	59757077	59760431	RP11-467C18.1	ENSG00000270457	-1764	59754975	59755312	-	768	69	TRUE	0.19082	6.36661	0.11541	1	FALSE	-0.831027	6.36663	5.72579e-15	7.46071e-11	TRUE	0.371603	6.36662	8.86762e-05	0.989094	FALSE	0.329781	6.36663	0.00268949	1	FALSE	0.212172	6.36662	0.24658	1	FALSE	-0.436889	6.36663	0.000291857	1	FALSE	0.20045	6.36657	0.181	1	FALSE
1	59760516	59761809	FGGY	ENSG00000172456	-500	59762310	59787384	+	768	359	TRUE	0.0496726	6.70957	0.597126	1	FALSE	-0.784784	6.70958	2.16505e-15	2.8282e-11	TRUE	0.490701	6.70958	4.20545e-08	0.00052442	FALSE	0.255182	6.70958	0.0156807	1	FALSE	0.382558	6.70958	0.023706	1	FALSE	-0.65845	6.70958	1.42214e-08	0.000169448	FALSE	0.299515	6.70957	0.0284211	1	FALSE
1	60279710	60279957	HOOK1	ENSG00000134709	-500	60280458	60301022	+	768	17	FALSE	1.16726	4.2872	1.34862e-07	0.00166406	FALSE	-0.999554	4.28726	2.67953e-05	0.290462	FALSE	0.0985495	4.28722	0.548985	1	FALSE	-0.182869	4.28724	0.478071	1	FALSE	0.339986	4.28724	0.469268	1	FALSE	-0.0968662	4.28727	1	1	FALSE	-0.708546	4.28706	0.0553389	1	FALSE
1	60392963	60393686	CYP2J2	ENSG00000134716	-500	60358980	60392462	-	768	11	FALSE	0.240647	4.41547	0.419651	1	FALSE	0.242995	4.41548	0.246213	1	FALSE	-0.644475	4.41547	0.00222069	1	FALSE	-0.221921	4.41548	0.391724	1	FALSE	-0.541361	4.41548	0.450263	1	FALSE	0.547774	4.41548	0.0229599	1	FALSE	0.0400819	4.41543	0.750162	1	FALSE
1	60856476	60857352	RP11-776H12.1	ENSG00000226476	148568	61005921	61106163	-	768	7	FALSE	0.301764	4.3216	0.385741	1	FALSE	-0.791355	4.32164	0.00637254	1	FALSE	0.726076	4.32161	0.00594086	1	FALSE	-0.236246	4.32162	0.599127	1	FALSE	0.629147	4.32162	0.170721	1	FALSE	-0.284374	4.32164	0.41592	1	FALSE	-0.673003	4.32152	0.204088	1	FALSE
1	62107072	62107684	RP11-430G17.1	ENSG00000223920	-12181	62119866	62120580	+	768	2	FALSE	0.127055	4.17665	0.70834	1	FALSE	-0.02961	4.17665	1	1	FALSE	0.0989168	4.17665	0.647852	1	FALSE	-0.313532	4.17665	0.147199	1	FALSE	0.226894	4.17665	0.418071	1	FALSE	-0.201383	4.17665	0.36976	1	FALSE	0.336454	4.17665	0.280685	1	FALSE
1	62191596	62191625	TM2D1	ENSG00000162604	-500	62146721	62191095	-	768	54	TRUE	0.215697	4.12889	0.383226	1	FALSE	-0.302089	4.12889	0.0709297	1	FALSE	0.196334	4.12889	0.157156	1	FALSE	-0.0999848	4.12889	0.700753	1	FALSE	0.196143	4.12889	1	1	FALSE	-0.0624641	4.12889	1	1	FALSE	-0.0739479	4.12887	1	1	FALSE
1	62901073	62901467	USP1	ENSG00000162607	-500	62901968	62908991	+	768	132	TRUE	0.670402	5.04012	3.21144e-05	0.368256	FALSE	-1.12346	5.04029	9.59308e-13	1.23348e-08	TRUE	-0.544459	5.04018	0.000140864	1	FALSE	0.315952	5.04023	0.0215973	1	FALSE	1.24562	5.04022	4.94472e-10	6.37176e-06	TRUE	0.0601816	5.04031	0.789108	1	FALSE	-0.0711183	5.03971	0.820412	1	FALSE
1	63206210	63206870	RP11-230B22.1	ENSG00000235545	29844	63154153	63176365	+	768	0	FALSE	-0.258325	4.20313	0.449834	1	FALSE	0.357849	4.20314	0.0699627	1	FALSE	0.0192021	4.20313	1	1	FALSE	0.09769	4.20314	1	1	FALSE	-0.455795	4.20314	0.642359	1	FALSE	-0.327485	4.20315	0.206572	1	FALSE	0.0621669	4.20308	1	1	FALSE
1	63248931	63249305	ATG4C	ENSG00000125703	-500	63249806	63284736	+	768	184	TRUE	0.250783	4.90282	0.133914	1	FALSE	-0.259552	4.90285	0.0740309	1	FALSE	-0.121948	4.90283	0.420515	1	FALSE	-0.0403254	4.90284	0.732961	1	FALSE	-0.445697	4.90284	0.103577	1	FALSE	0.28168	4.90285	0.0400639	1	FALSE	0.27313	4.90276	0.229976	1	FALSE
1	63429102	63430633	RP11-5P4.1	ENSG00000229537	35534	63466168	63476596	-	768	2	FALSE	0.497966	4.19853	0.119547	1	FALSE	0.308014	4.19853	0.240181	1	FALSE	-0.399047	4.19853	0.128607	1	FALSE	-0.548986	4.19853	0.0550853	1	FALSE	-0.730211	4.19853	0.0513186	1	FALSE	0.290492	4.19853	0.324366	1	FALSE	0.13986	4.19855	0.525146	1	FALSE
1	63590082	63590863	RP11-335E6.2	ENSG00000203605	-14057	63604921	63628824	+	768	0	FALSE	0.138697	4.12037	0.860719	1	FALSE	0.217209	4.12037	0.0206843	1	FALSE	-0.100987	4.12037	0.563962	1	FALSE	-0.0931475	4.12037	0.842538	1	FALSE	-0.0820873	4.12037	1	1	FALSE	-0.0909234	4.12037	0.889564	1	FALSE	-0.0842264	4.12036	1	1	FALSE
1	63832641	63832760	ALG6	ENSG00000088035	-500	63833261	63904233	+	768	6	FALSE	0.370774	4.14247	0.332998	1	FALSE	-0.367286	4.14247	0.0905083	1	FALSE	-0.0663797	4.14247	1	1	FALSE	0.0729168	4.14247	0.908607	1	FALSE	0.338543	4.14247	0.838805	1	FALSE	0.0817702	4.14247	0.506439	1	FALSE	-0.288981	4.14246	0.677054	1	FALSE
1	64179614	64180168	PGM1	ENSG00000079739	53697	64058947	64125916	+	768	0	FALSE	-0.336362	4.23936	0.349012	1	FALSE	0.108012	4.23936	0.694904	1	FALSE	-0.0971703	4.23936	0.791382	1	FALSE	-0.130366	4.23936	0.488774	1	FALSE	0.263576	4.23936	0.625045	1	FALSE	0.283438	4.23936	0.220923	1	FALSE	-0.0699656	4.23935	1	1	FALSE
1	64183476	64184386	ROR1	ENSG00000185483	-55306	64239693	64609068	+	768	1	FALSE	-0.401505	4.37059	0.0960349	1	FALSE	0.471058	4.3706	0.00907282	1	FALSE	-0.278419	4.37059	0.16662	1	FALSE	-0.149919	4.3706	0.601765	1	FALSE	-0.789453	4.3706	0.0190498	1	FALSE	0.359151	4.3706	0.0770212	1	FALSE	0.0754644	4.37057	0.911861	1	FALSE
1	64659921	64661352	UBE2U	ENSG00000177414	-7957	64669310	64726377	+	768	0	FALSE	-0.418431	4.16581	0.19365	1	FALSE	0.381085	4.16581	0.0645131	1	FALSE	-0.0088337	4.16581	1	1	FALSE	-0.63198	4.16581	0.00429337	1	FALSE	0.911801	4.16581	0.0102162	1	FALSE	-0.114076	4.16581	0.735873	1	FALSE	0.00762085	4.16582	1	1	FALSE
1	64935126	64935927	CACHD1	ENSG00000158966	-500	64936428	65158741	+	768	3	FALSE	0.517481	4.48385	0.0629692	1	FALSE	0.947363	4.48382	2.62862e-06	0.0298322	FALSE	-0.492143	4.48384	0.0364624	1	FALSE	-1.39604	4.48383	5.47516e-07	0.00655212	FALSE	-1.63926	4.48383	0.000449795	1	FALSE	0.135019	4.48382	0.537477	1	FALSE	0.0782278	4.4839	0.957836	1	FALSE
1	65209844	65210277	RAVER2	ENSG00000162437	-500	65210778	65298912	+	768	12	FALSE	0.230681	4.36829	0.356287	1	FALSE	-0.177225	4.36832	0.324095	1	FALSE	0.126625	4.3683	0.38	1	FALSE	-0.244399	4.36831	0.181671	1	FALSE	0.223578	4.36831	0.800045	1	FALSE	0.172409	4.36832	0.335995	1	FALSE	-0.369292	4.36824	0.442903	1	FALSE
1	65432688	65432907	JAK1	ENSG00000162434	-500	65298912	65432187	-	768	39	TRUE	0.205755	4.40337	0.461809	1	FALSE	-0.0685415	4.4034	0.678886	1	FALSE	-0.651597	4.40338	0.000224653	1	FALSE	0.10295	4.40339	0.499524	1	FALSE	-0.24932	4.40339	0.989609	1	FALSE	0.647192	4.4034	0.000781847	1	FALSE	-0.107734	4.40331	0.739959	1	FALSE
1	65506655	65507613	MIR3671	ENSG00000265996	15824	65523438	65523525	-	768	13	FALSE	-0.562155	4.75123	0.00483451	1	FALSE	0.226161	4.75127	0.200517	1	FALSE	-0.501062	4.75124	0.00096736	1	FALSE	-0.157729	4.75125	0.410456	1	FALSE	-0.258613	4.75125	0.462905	1	FALSE	0.882454	4.75127	1.25077e-09	1.51719e-05	FALSE	-0.176663	4.75114	0.351773	1	FALSE
1	65533921	65535357	RP4-535B20.1	ENSG00000231485	-500	65532310	65533420	-	768	406	TRUE	0.0538884	7.14637	0.693698	1	FALSE	-0.00367072	7.14643	0.975098	1	FALSE	-0.849156	7.14639	1.02218e-13	1.34417e-09	TRUE	0.0889401	7.14641	0.466045	1	FALSE	-0.308001	7.14641	0.193329	1	FALSE	0.699285	7.14644	6.85812e-09	8.22151e-05	TRUE	0.203084	7.14623	0.220489	1	FALSE
1	65537614	65538095	RP4-535B20.1	ENSG00000231485	-4193	65532310	65533420	-	768	0	FALSE	-0.0374033	4.16882	1	1	FALSE	0.252097	4.16883	0.486899	1	FALSE	-0.478657	4.16882	0.0167667	1	FALSE	-0.121791	4.16883	0.948639	1	FALSE	-0.309254	4.16882	0.957563	1	FALSE	0.731588	4.16883	0.00164394	1	FALSE	-0.587279	4.16878	0.114819	1	FALSE
1	66168992	66171301	RN7SL854P	ENSG00000239319	55441	66226743	66227035	-	768	683	TRUE	-0.895926	9.76036	4.72189e-08	0.000587828	TRUE	0.897413	9.76035	2.97968e-17	3.92633e-13	TRUE	-0.300368	9.76036	0.00945955	1	FALSE	-0.551437	9.76035	4.00465e-05	0.44712	FALSE	0.661991	9.76036	0.000857855	1	FALSE	-0.295955	9.76035	0.0295215	1	FALSE	0.0677488	9.76037	0.673489	1	FALSE
1	66182800	66187248	RN7SL854P	ENSG00000239319	39494	66226743	66227035	-	768	699	TRUE	-0.995188	9.93674	9.30567e-10	1.18666e-05	TRUE	1.04685	9.93673	1.38463e-24	1.85167e-20	TRUE	-0.212201	9.93674	0.062717	1	FALSE	-0.58682	9.93673	9.64633e-06	0.110827	FALSE	0.458106	9.93673	0.0217624	1	FALSE	-0.418908	9.93673	0.00190549	1	FALSE	-0.0862178	9.93674	0.640534	1	FALSE
1	66227536	66229200	RN7SL854P	ENSG00000239319	-500	66226743	66227035	-	768	6	FALSE	-1.49774	4.80735	5.11963e-10	6.54595e-06	FALSE	0.76537	4.80741	1.13274e-07	0.0013458	FALSE	-0.0736183	4.80737	0.74399	1	FALSE	0.0482352	4.80739	0.779456	1	FALSE	0.373605	4.80738	0.10565	1	FALSE	-0.39678	4.80741	0.027622	1	FALSE	-0.200847	4.8072	0.288132	1	FALSE
1	66232672	66233219	RN7SL854P	ENSG00000239319	-5636	66226743	66227035	-	768	23	FALSE	-0.701796	4.58169	0.00265728	1	FALSE	0.682615	4.58171	2.99831e-06	0.0339619	FALSE	-0.260414	4.58169	0.122762	1	FALSE	0.140955	4.5817	0.466802	1	FALSE	0.194121	4.5817	0.461108	1	FALSE	-0.342451	4.58171	0.0707721	1	FALSE	-0.214546	4.58164	0.337372	1	FALSE
1	66845260	66849777	PDE4B	ENSG00000184588	5000	66797687	66840259	+	768	244	TRUE	-0.514076	7.79138	0.000590445	1	FALSE	0.595259	7.7914	5.8959e-09	7.21599e-05	FALSE	-0.6317	7.79139	5.30989e-09	6.71648e-05	FALSE	-0.594471	7.79139	1.50507e-06	0.0178155	FALSE	-0.360452	7.79139	0.090554	1	FALSE	0.790588	7.7914	1.81042e-12	2.25995e-08	TRUE	-0.0779808	7.79135	0.645679	1	FALSE
1	66861525	66862689	PDE4B	ENSG00000184588	21265	66797687	66840259	+	768	2	FALSE	-1.65158	4.5605	0.000100193	1	FALSE	0.0710482	4.56039	0.818887	1	FALSE	-2.02334	4.56046	1.04509e-12	1.36677e-08	FALSE	-1.73255	4.56042	2.64577e-07	0.00318948	FALSE	-0.609432	4.56044	0.335737	1	FALSE	2.53382	4.56038	3.12505e-26	4.11194e-22	FALSE	0.03927	4.56075	1	1	FALSE
1	66891611	66892579	PDE4B	ENSG00000184588	51351	66797687	66840259	+	768	1	FALSE	-0.0248569	4.30328	1	1	FALSE	0.155855	4.30331	0.556939	1	FALSE	-0.26752	4.30329	0.231093	1	FALSE	-0.180748	4.3033	0.534354	1	FALSE	1.10939	4.3033	8.26172e-05	0.966787	FALSE	-0.365035	4.30331	0.16099	1	FALSE	0.068668	4.30321	0.898565	1	FALSE
1	66902122	66902777	PDE4B	ENSG00000184588	61862	66797687	66840259	+	768	143	TRUE	-3.02015	5.84407	1.49096e-14	1.96538e-10	TRUE	1.63632	5.84405	4.54649e-15	5.92908e-11	TRUE	-1.22082	5.84406	1.00612e-06	0.0121408	FALSE	-1.66142	5.84406	3.49623e-08	0.000429791	TRUE	1.84977	5.84406	1.51342e-07	0.00189934	TRUE	-0.927592	5.84405	0.00176935	1	FALSE	0.472684	5.8441	0.151205	1	FALSE
1	66904148	66906020	PDE4B	ENSG00000184588	63888	66797687	66840259	+	768	141	TRUE	-0.940542	6.41819	2.66859e-05	0.307021	FALSE	1.09617	6.4182	1.85478e-14	2.41196e-10	TRUE	-1.17203	6.4182	5.52006e-13	7.22796e-09	TRUE	-0.689679	6.4182	0.000210881	1	FALSE	1.68248	6.4182	8.70462e-13	1.13743e-08	TRUE	-0.761987	6.4182	6.81299e-05	0.721904	FALSE	0.443824	6.41817	0.0451841	1	FALSE
1	66909660	66913135	PDE4B	ENSG00000184588	69400	66797687	66840259	+	768	410	TRUE	0.757212	8.6229	4.84136e-06	0.0574282	FALSE	-0.100161	8.62296	0.495117	1	FALSE	-0.828025	8.62292	3.18321e-09	4.03822e-05	TRUE	0.487013	8.62294	0.00078872	1	FALSE	0.691548	8.62293	0.00303771	1	FALSE	-0.855392	8.62296	2.32155e-07	0.00268766	TRUE	0.28813	8.62277	0.138858	1	FALSE
1	67520283	67520613	SLC35D1	ENSG00000116704	-500	67465015	67519782	-	768	363	TRUE	-0.183161	5.55693	0.195983	1	FALSE	0.00232579	5.55697	0.935544	1	FALSE	-0.0213289	5.55694	0.9617	1	FALSE	0.301234	5.55696	0.00277253	1	FALSE	0.0723677	5.55695	0.666127	1	FALSE	-0.269918	5.55698	0.0190056	1	FALSE	0.0562867	5.55682	0.802389	1	FALSE
1	67896599	67897538	SERBP1	ENSG00000142864	-500	67873493	67896098	-	768	183	TRUE	0.240244	5.92536	0.0681539	1	FALSE	0.389253	5.92536	5.46076e-05	0.581243	FALSE	0.20603	5.92536	0.0296549	1	FALSE	-0.801297	5.92536	7.07068e-12	9.10704e-08	TRUE	0.380403	5.92536	0.0285926	1	FALSE	-0.218459	5.92536	0.0746992	1	FALSE	-0.570144	5.92537	0.000322037	1	FALSE
1	67966064	67966671	RP4-763G1.2	ENSG00000235200	-28641	67995313	67998012	+	768	0	FALSE	0.168016	4.12057	0.191111	1	FALSE	0.0724053	4.12057	1	1	FALSE	-0.112585	4.12057	0.544335	1	FALSE	-0.104965	4.12057	0.822813	1	FALSE	-0.0927263	4.12057	1	1	FALSE	0.0151751	4.12057	1	1	FALSE	0.0996526	4.12057	0.696293	1	FALSE
1	68075149	68076489	RN7SL392P	ENSG00000242482	46026	68122516	68122812	-	768	1	FALSE	-0.568964	4.32908	0.055029	1	FALSE	0.47565	4.32909	0.0252053	1	FALSE	0.0971498	4.32908	0.569644	1	FALSE	-1.4238	4.32909	4.15848e-08	0.000510412	FALSE	0.229348	4.32908	0.410143	1	FALSE	0.4416	4.32909	0.0514715	1	FALSE	0.148513	4.32903	0.937446	1	FALSE
1	68113224	68114014	RN7SL392P	ENSG00000242482	8501	68122516	68122812	-	768	5	FALSE	-1.06236	4.32234	0.000956193	1	FALSE	-0.0962634	4.32235	0.569689	1	FALSE	0.0231565	4.32234	0.78253	1	FALSE	-0.405976	4.32234	0.146733	1	FALSE	0.396489	4.32234	0.378841	1	FALSE	0.839771	4.32235	0.000190524	1	FALSE	-0.125434	4.32232	0.707016	1	FALSE
1	68139818	68141851	GADD45A	ENSG00000116717	-8892	68150744	68154021	+	768	14	FALSE	-0.446606	4.7129	0.11956	1	FALSE	-0.0365308	4.71296	0.809769	1	FALSE	-0.12506	4.71292	0.686446	1	FALSE	-0.770862	4.71294	0.000729427	1	FALSE	-0.36604	4.71293	0.436125	1	FALSE	1.0007	4.71297	7.1922e-07	0.00820774	FALSE	0.129362	4.71274	0.677941	1	FALSE
1	68148365	68150243	GADD45A	ENSG00000116717	-500	68150744	68154021	+	768	51	TRUE	-1.01343	5.65514	5.84476e-05	0.661568	FALSE	0.100067	5.65516	0.605606	1	FALSE	-0.548675	5.65515	0.00209129	1	FALSE	-1.72499	5.65515	1.6488e-15	2.16603e-11	TRUE	-0.40303	5.65515	0.314778	1	FALSE	1.66244	5.65516	2.99923e-24	3.93439e-20	TRUE	0.192588	5.6551	0.443138	1	FALSE
1	69346975	69348388	RP11-424D14.1	ENSG00000223883	-173192	69521581	69650686	+	768	204	TRUE	1.06966	7.41967	0.00141701	1	FALSE	-0.963749	7.41971	0.00194976	1	FALSE	0.495048	7.41968	0.0640038	1	FALSE	0.0532762	7.4197	0.830502	1	FALSE	0.45758	7.41969	0.3156	1	FALSE	-0.956207	7.41972	0.00758419	1	FALSE	-0.581699	7.41955	0.235541	1	FALSE
1	69436776	69440546	RP11-424D14.1	ENSG00000223883	-81034	69521581	69650686	+	768	0	FALSE	-0.00827657	4.28311	0.982742	1	FALSE	-0.238885	4.28316	0.374559	1	FALSE	-0.0800089	4.28313	0.89576	1	FALSE	0.416514	4.28314	0.0830367	1	FALSE	0.109497	4.28314	0.777845	1	FALSE	0.0840871	4.28316	0.724675	1	FALSE	-0.419474	4.28301	0.20312	1	FALSE
1	70875695	70876400	CTH	ENSG00000116761	-500	70876901	70905534	+	768	49	TRUE	0.282433	4.99984	0.062126	1	FALSE	-0.603765	4.9999	1.55147e-05	0.170429	FALSE	0.104608	4.99987	0.323163	1	FALSE	0.474065	4.99988	0.000250705	1	FALSE	-0.227298	4.99988	0.284856	1	FALSE	0.00639284	4.99991	0.851293	1	FALSE	-0.400467	4.9997	0.0498808	1	FALSE
1	70983212	70984096	RP11-42O15.2	ENSG00000233020	-12112	70996209	70997175	+	768	0	FALSE	0.184753	4.12847	0.384681	1	FALSE	-0.145817	4.12848	0.709558	1	FALSE	0.0323253	4.12847	0.809253	1	FALSE	-0.0475702	4.12847	1	1	FALSE	0.154484	4.12847	1	1	FALSE	0.101167	4.12848	0.822843	1	FALSE	-0.280758	4.12844	0.6069	1	FALSE
1	72748918	72751891	NEGR1	ENSG00000172260	-500	71861623	72748417	-	768	28	FALSE	3.20687	5.21135	1.86132e-51	2.5018e-47	FALSE	-1.82033	5.21143	4.84078e-11	6.12892e-07	FALSE	-1.99176	5.21138	2.07176e-13	2.7198e-09	FALSE	-0.988742	5.2114	0.00135367	1	FALSE	-0.218994	5.2114	0.731016	1	FALSE	-0.0735025	5.21144	0.858217	1	FALSE	-0.834444	5.21115	0.0573978	1	FALSE
1	72787857	72791772	RPL31P12	ENSG00000227207	20344	72767155	72767512	+	768	0	FALSE	1.06725	4.20609	0.000253483	1	FALSE	-0.371279	4.20609	0.151431	1	FALSE	-0.12999	4.20609	0.818302	1	FALSE	-0.628269	4.20609	0.0368401	1	FALSE	-0.588475	4.20609	0.443699	1	FALSE	0.479876	4.20609	0.0909544	1	FALSE	-0.478407	4.20609	0.211447	1	FALSE
1	73088996	73089416	RNU6-1246P	ENSG00000212366	93929	73183346	73183452	-	768	1	FALSE	1.14717	4.20638	3.12042e-05	0.358068	FALSE	-0.492816	4.2064	0.0507072	1	FALSE	0.253994	4.20639	0.291602	1	FALSE	-0.256981	4.20639	0.452412	1	FALSE	0.141886	4.20639	0.672545	1	FALSE	-0.738491	4.2064	0.025221	1	FALSE	-0.39109	4.20632	0.377122	1	FALSE
1	73626527	73628103	RN7SKP19	ENSG00000251825	29183	73657287	73657538	-	768	109	TRUE	-1.9114	6.24529	4.54186e-08	0.000565553	TRUE	-0.841571	6.24532	0.00043674	1	FALSE	0.446374	6.2453	0.0334513	1	FALSE	1.40302	6.24531	1.52935e-10	1.9438e-06	TRUE	-0.743291	6.24531	0.126066	1	FALSE	-0.696485	6.24532	0.0111937	1	FALSE	-0.0848422	6.24523	0.856139	1	FALSE
1	73825935	73826865	RP4-598G3.1	ENSG00000233973	5000	73771917	73820934	+	768	45	TRUE	-1.69605	4.92132	3.50261e-06	0.0417406	FALSE	-0.618384	4.92136	0.0111663	1	FALSE	0.960862	4.92134	3.4397e-06	0.0407845	FALSE	0.767542	4.92135	0.00123394	1	FALSE	-0.492847	4.92134	0.335527	1	FALSE	-0.847161	4.92137	0.00299968	1	FALSE	-0.267711	4.92123	0.466356	1	FALSE
1	73829942	73837427	RP4-598G3.1	ENSG00000233973	9007	73771917	73820934	+	768	129	TRUE	-1.89916	7.39367	4.47823e-09	5.66182e-05	TRUE	-1.09341	7.39369	1.12148e-06	0.0129083	FALSE	0.564583	7.39368	0.00370053	1	FALSE	1.22301	7.39368	3.61123e-09	4.51513e-05	TRUE	-1.18067	7.39368	0.00872665	1	FALSE	-0.44532	7.39369	0.0762784	1	FALSE	0.27301	7.39364	0.339817	1	FALSE
1	74058196	74060597	RP4-788P17.1	ENSG00000223479	-40301	74100899	74175264	+	768	19	FALSE	-1.72915	5.06525	5.23667e-05	0.5941	FALSE	-0.0724794	5.06532	0.829192	1	FALSE	1.22413	5.06528	9.3881e-07	0.0113408	FALSE	-0.171174	5.0653	0.632071	1	FALSE	-1.45244	5.06529	0.0230634	1	FALSE	-0.44229	5.06533	0.20243	1	FALSE	-0.3391	5.06508	0.489366	1	FALSE
1	74470664	74471521	LRRIQ3	ENSG00000162620	20177	74491699	74540474	-	768	38	FALSE	-3.29083	4.85888	6.4625e-15	8.53244e-11	FALSE	-1.66467	4.85895	3.4976e-09	4.3024e-05	FALSE	0.545384	4.8589	0.0172452	1	FALSE	0.593183	4.85893	0.0218755	1	FALSE	-1.40793	4.85892	0.0110765	1	FALSE	1.36264	4.85896	5.53991e-08	0.000651217	FALSE	-1.12737	4.8587	0.00772396	1	FALSE
1	75276731	75279601	TYW3	ENSG00000162623	44368	75229577	75232362	+	768	48	TRUE	0.239526	5.90267	0.142144	1	FALSE	-0.581764	5.90275	2.03443e-05	0.222201	FALSE	-0.0174939	5.9027	1	1	FALSE	-0.073924	5.90273	0.592417	1	FALSE	1.27437	5.90272	3.12021e-10	4.02694e-06	TRUE	-0.328194	5.90276	0.0371037	1	FALSE	0.22988	5.90249	0.207423	1	FALSE
1	75289243	75291240	TYW3	ENSG00000162623	56880	75229577	75232362	+	768	0	FALSE	-0.179728	4.44625	0.606792	1	FALSE	0.0691095	4.44628	0.829942	1	FALSE	0.0579153	4.44626	0.692027	1	FALSE	-0.0152473	4.44627	0.998052	1	FALSE	1.36918	4.44627	2.87685e-07	0.0035952	FALSE	-1.27865	4.44629	1.80405e-07	0.00209396	FALSE	0.111848	4.44618	0.739818	1	FALSE
1	75322238	75325444	TYW3	ENSG00000162623	89875	75229577	75232362	+	768	14	FALSE	-0.542395	5.1329	0.0635348	1	FALSE	-0.564836	5.13291	0.00524393	1	FALSE	-0.159766	5.13291	0.483605	1	FALSE	-1.08169	5.13291	7.71798e-06	0.0890038	FALSE	0.871988	5.13291	0.00875489	1	FALSE	1.37737	5.13291	2.93381e-12	3.6564e-08	FALSE	-0.345619	5.13288	0.341283	1	FALSE
1	75398688	75399523	RP11-93N20.1	ENSG00000229943	-29474	75428998	75430802	+	768	0	FALSE	-0.0294146	4.13169	1	1	FALSE	-0.228002	4.1317	0.233714	1	FALSE	-0.0994705	4.13169	0.50858	1	FALSE	0.305806	4.1317	0.0681165	1	FALSE	0.186291	4.1317	0.38768	1	FALSE	-0.0772251	4.1317	1	1	FALSE	0.0847996	4.13168	0.824081	1	FALSE
1	75452282	75453010	RP11-93N20.1	ENSG00000229943	21479	75428998	75430802	+	768	0	FALSE	0.253548	4.16481	0.379246	1	FALSE	-0.221377	4.16482	0.278668	1	FALSE	0.123342	4.16482	0.482423	1	FALSE	-0.217123	4.16482	0.548961	1	FALSE	1.03067	4.16482	0.00170503	1	FALSE	-0.467387	4.16483	0.0802052	1	FALSE	-0.224996	4.16479	0.778277	1	FALSE
1	75540417	75541196	RP11-510C10.4	ENSG00000261213	47006	75588203	75589612	-	768	20	FALSE	-0.729056	4.52621	0.122551	1	FALSE	-1.21529	4.52628	0.000513693	1	FALSE	0.946658	4.52623	0.000872095	1	FALSE	-0.37434	4.52626	0.319009	1	FALSE	2.37337	4.52625	8.86112e-08	0.00111606	FALSE	-1.66632	4.52629	3.231e-05	0.347688	FALSE	-0.576685	4.52604	0.32728	1	FALSE
1	75646870	75647726	RNU6-622P	ENSG00000206999	-1003	75648730	75648832	+	768	0	FALSE	-0.067968	4.18553	0.975608	1	FALSE	-0.470156	4.18555	0.0291053	1	FALSE	0.352088	4.18554	0.113734	1	FALSE	-0.638541	4.18554	0.0197481	1	FALSE	0.821839	4.18554	0.0124375	1	FALSE	0.348205	4.18555	0.173274	1	FALSE	-0.290369	4.18549	0.637382	1	FALSE
1	78149605	78150665	ZZZ3	ENSG00000036549	-500	78030573	78149104	-	768	235	TRUE	-0.265367	6.15656	0.0298937	1	FALSE	-0.242391	6.15666	0.0127668	1	FALSE	0.107404	6.15659	0.191169	1	FALSE	0.370685	6.15663	0.000175608	1	FALSE	-0.109863	6.15661	0.544328	1	FALSE	-0.0569547	6.15667	0.657931	1	FALSE	-0.00494989	6.15632	0.929604	1	FALSE
1	78152941	78154184	ZZZ3	ENSG00000036549	-3836	78030573	78149104	-	768	2	FALSE	0.0359541	4.67204	0.80059	1	FALSE	-0.328787	4.67209	0.017969	1	FALSE	-0.0212225	4.67206	1	1	FALSE	0.469068	4.67208	0.000704033	1	FALSE	0.418178	4.67207	0.0385254	1	FALSE	-0.384648	4.6721	0.0202422	1	FALSE	-0.0709615	4.67192	0.63965	1	FALSE
1	78244663	78244808	FAM73A	ENSG00000180488	-500	78245309	78344106	+	768	13	FALSE	0.235595	4.15694	0.578021	1	FALSE	-0.203833	4.15694	0.40687	1	FALSE	-0.278232	4.15694	0.134613	1	FALSE	0.142771	4.15694	0.42812	1	FALSE	-0.138376	4.15694	0.75418	1	FALSE	0.183718	4.15694	0.337036	1	FALSE	0.183871	4.15693	0.487653	1	FALSE
1	78609134	78609418	GIPC2	ENSG00000137960	5000	78511586	78604133	+	768	5	FALSE	0.0429254	4.1763	1	1	FALSE	-0.107422	4.17632	0.872577	1	FALSE	-0.298352	4.17631	0.165386	1	FALSE	0.328332	4.17631	0.0896137	1	FALSE	-0.392999	4.17631	0.370588	1	FALSE	-0.0606517	4.17632	0.764175	1	FALSE	0.457571	4.17626	0.14955	1	FALSE
1	79505989	79506779	PSAT1P3	ENSG00000230787	13850	79520630	79521740	-	768	1	FALSE	0.377325	4.1225	0.0463948	1	FALSE	-0.0572384	4.1225	1	1	FALSE	-0.128149	4.1225	0.433954	1	FALSE	-0.118638	4.1225	0.704618	1	FALSE	-0.105082	4.1225	1	1	FALSE	-0.116723	4.1225	0.752038	1	FALSE	0.33282	4.12251	0.169005	1	FALSE
1	79658846	79659460	AC093430.1	ENSG00000266388	-57934	79600818	79600911	-	768	0	FALSE	-0.156553	4.133	0.798541	1	FALSE	0.0218996	4.133	1	1	FALSE	-0.173857	4.133	0.433258	1	FALSE	0.0635185	4.133	0.590688	1	FALSE	-0.275425	4.133	0.825053	1	FALSE	-0.0782675	4.133	0.92477	1	FALSE	0.644817	4.13299	0.0199012	1	FALSE
1	79725562	79726983	RP4-726F1.1	ENSG00000235011	-62470	79789454	79790548	+	768	0	FALSE	-0.245468	4.16065	0.523116	1	FALSE	0.478836	4.16066	0.0138188	1	FALSE	-0.0424748	4.16066	1	1	FALSE	-0.24507	4.16066	0.252744	1	FALSE	0.311125	4.16066	0.426036	1	FALSE	-0.481916	4.16066	0.0522042	1	FALSE	0.173809	4.16062	0.657007	1	FALSE
1	79906348	79908569	ADH5P2	ENSG00000232676	-78195	79986765	79987888	+	768	3	FALSE	0.508846	4.44607	0.0517737	1	FALSE	-0.788128	4.44613	0.00117113	1	FALSE	-0.13783	4.44609	0.608843	1	FALSE	1.1641	4.44611	3.67487e-08	0.000451568	FALSE	-1.60427	4.44611	0.00182789	1	FALSE	-0.895677	4.44614	0.00127188	1	FALSE	0.0814271	4.44591	0.869505	1	FALSE
1	79925699	79927978	ADH5P2	ENSG00000232676	-58786	79986765	79987888	+	768	8	FALSE	0.588614	5.01704	0.0630776	1	FALSE	-0.778132	5.01707	0.00479575	1	FALSE	1.05993	5.01706	6.83491e-06	0.0802761	FALSE	-0.0911542	5.01706	0.844398	1	FALSE	-2.71643	5.01706	2.46954e-05	0.294987	FALSE	-0.794122	5.01708	0.0174365	1	FALSE	-0.31709	5.01697	0.462693	1	FALSE
1	79933733	79935283	ADH5P2	ENSG00000232676	-51481	79986765	79987888	+	768	33	FALSE	1.3021	4.90742	2.35802e-05	0.272045	FALSE	-1.15148	4.90742	6.19318e-05	0.657034	FALSE	0.295237	4.90742	0.246801	1	FALSE	0.356793	4.90742	0.200371	1	FALSE	-2.57799	4.90742	6.19078e-05	0.728159	FALSE	-1.24595	4.90742	0.000345038	1	FALSE	0.516427	4.90741	0.163026	1	FALSE
1	79937579	79938353	ADH5P2	ENSG00000232676	-48411	79986765	79987888	+	768	1	FALSE	-0.429323	4.16282	0.342483	1	FALSE	-0.54606	4.16282	0.0180209	1	FALSE	0.969528	4.16282	1.91727e-05	0.220774	FALSE	0.0511142	4.16282	0.929294	1	FALSE	-0.644259	4.16282	0.324186	1	FALSE	-0.38078	4.16282	0.230256	1	FALSE	-0.300762	4.16281	0.655545	1	FALSE
1	79960258	79963162	ADH5P2	ENSG00000232676	-23602	79986765	79987888	+	768	2	FALSE	0.0919861	4.27896	0.792978	1	FALSE	-0.237915	4.27903	0.415046	1	FALSE	-0.201529	4.27899	0.526176	1	FALSE	0.634042	4.27901	0.00964181	1	FALSE	-1.62876	4.279	0.00431769	1	FALSE	-0.16179	4.27904	0.642429	1	FALSE	0.295878	4.27879	0.433589	1	FALSE
1	79982368	79986264	ADH5P2	ENSG00000232676	-500	79986765	79987888	+	768	30	FALSE	1.18047	5.79237	6.32092e-09	7.97384e-05	FALSE	0.259584	5.79242	0.132199	1	FALSE	-0.978308	5.79239	1.63423e-07	0.002015	FALSE	0.488604	5.79241	0.00934204	1	FALSE	-2.53563	5.7924	2.81484e-09	3.60187e-05	FALSE	-0.822609	5.79243	0.000130184	1	FALSE	0.152149	5.79222	0.54844	1	FALSE
1	79998103	79998763	ADH5P2	ENSG00000232676	10214	79986765	79987888	+	768	0	FALSE	0.230196	4.13119	0.442536	1	FALSE	0.131248	4.13119	0.394488	1	FALSE	-0.219032	4.13119	0.220179	1	FALSE	0.00598377	4.13119	1	1	FALSE	-0.00191438	4.13119	1	1	FALSE	-0.27149	4.13119	0.163881	1	FALSE	0.270156	4.13119	0.277313	1	FALSE
1	80104146	80104812	ADH5P2	ENSG00000232676	116257	79986765	79987888	+	768	1	FALSE	-0.0167001	4.14435	1	1	FALSE	0.221284	4.14435	0.271246	1	FALSE	-0.0702524	4.14435	0.804873	1	FALSE	-0.201009	4.14435	0.32217	1	FALSE	-0.421276	4.14435	0.510008	1	FALSE	-0.0402833	4.14435	1	1	FALSE	0.34065	4.14435	0.175331	1	FALSE
1	80133159	80134556	ADH5P2	ENSG00000232676	145270	79986765	79987888	+	768	0	FALSE	0.261902	4.15259	0.242518	1	FALSE	0.0933013	4.15259	0.714576	1	FALSE	-0.346326	4.15259	0.0605099	1	FALSE	0.04522	4.15259	0.797813	1	FALSE	-0.337061	4.15259	0.355872	1	FALSE	-0.0112708	4.15259	0.992397	1	FALSE	0.316029	4.15258	0.395474	1	FALSE
1	80173900	80177917	ADH5P2	ENSG00000232676	186011	79986765	79987888	+	768	2	FALSE	0.263284	4.66907	0.281828	1	FALSE	0.426711	4.66914	0.0176765	1	FALSE	-0.729868	4.66909	0.000331562	1	FALSE	0.46825	4.66911	0.0176229	1	FALSE	-0.840021	4.66911	0.034691	1	FALSE	-0.505814	4.66915	0.0165662	1	FALSE	0.324501	4.6689	0.229456	1	FALSE
1	80207082	80208104	ADH5P2	ENSG00000232676	219193	79986765	79987888	+	768	0	FALSE	0.435631	4.16712	0.141353	1	FALSE	-0.394839	4.16713	0.0679739	1	FALSE	-0.337796	4.16712	0.152817	1	FALSE	0.174762	4.16713	0.469383	1	FALSE	-0.72534	4.16713	0.169896	1	FALSE	-0.097896	4.16713	0.868121	1	FALSE	0.853486	4.16708	0.00192334	1	FALSE
1	80225734	80227258	ADH5P2	ENSG00000232676	237845	79986765	79987888	+	768	1	FALSE	0.121557	4.1699	0.826543	1	FALSE	0.243885	4.16991	0.312649	1	FALSE	-0.798616	4.1699	0.000101011	1	FALSE	0.538194	4.16991	0.0176821	1	FALSE	-0.745749	4.16991	0.166216	1	FALSE	-0.258865	4.16992	0.324511	1	FALSE	0.444306	4.16986	0.233819	1	FALSE
1	80242466	80244596	ADH5P2	ENSG00000232676	254577	79986765	79987888	+	768	0	FALSE	-0.00388837	4.15029	1	1	FALSE	0.116873	4.1503	0.640554	1	FALSE	-0.276367	4.15029	0.282103	1	FALSE	0.196735	4.15029	0.407325	1	FALSE	-0.277751	4.15029	0.936985	1	FALSE	-0.0123697	4.1503	1	1	FALSE	0.167137	4.15026	1	1	FALSE
1	80291119	80291976	RP11-339A11.1	ENSG00000235756	265811	80557788	80558922	-	768	1	FALSE	-0.859942	4.25633	0.0105808	1	FALSE	0.232957	4.25635	0.281468	1	FALSE	-0.124725	4.25634	0.714587	1	FALSE	0.619764	4.25634	0.00883517	1	FALSE	-0.871234	4.25634	0.0973917	1	FALSE	-0.530682	4.25636	0.0543855	1	FALSE	0.499938	4.25627	0.131857	1	FALSE
1	80359727	80360453	RP11-339A11.1	ENSG00000235756	197334	80557788	80558922	-	768	84	TRUE	1.56479	5.08057	1.10419e-12	1.44285e-08	TRUE	-0.0793421	5.0806	0.706667	1	FALSE	0.554743	5.08058	0.00310416	1	FALSE	-1.74899	5.08059	1.6342e-11	2.09733e-07	TRUE	-2.10598	5.08059	8.09175e-06	0.0981125	FALSE	-0.919349	5.0806	0.000321414	1	FALSE	-0.206256	5.08051	0.492505	1	FALSE
1	80468435	80469352	RP11-339A11.1	ENSG00000235756	88435	80557788	80558922	-	768	1	FALSE	-0.0412323	4.15977	1	1	FALSE	-0.188257	4.15977	0.575649	1	FALSE	-0.0400361	4.15977	1	1	FALSE	0.221311	4.15977	0.391002	1	FALSE	-0.608584	4.15977	0.267913	1	FALSE	-0.109871	4.15977	0.72551	1	FALSE	0.558682	4.15977	0.0867833	1	FALSE
1	80497652	80498599	RP11-339A11.1	ENSG00000235756	59188	80557788	80558922	-	768	0	FALSE	0.24386	4.12738	0.235247	1	FALSE	0.0697498	4.12738	0.84354	1	FALSE	-0.225499	4.12738	0.0989817	1	FALSE	-0.00567048	4.12738	1	1	FALSE	-0.185548	4.12738	1	1	FALSE	0.183662	4.12738	0.473521	1	FALSE	-0.190482	4.12738	0.745167	1	FALSE
1	80679939	80681430	HMGB1P18	ENSG00000236407	-67606	80749037	80749655	+	768	3	FALSE	-0.091571	4.28922	0.913332	1	FALSE	0.298093	4.28927	0.237617	1	FALSE	-1.33389	4.28924	2.74342e-07	0.00336783	FALSE	1.31368	4.28926	7.04528e-08	0.000861357	FALSE	-1.67817	4.28925	0.00373654	1	FALSE	-0.487075	4.28928	0.183063	1	FALSE	-0.0591134	4.28909	0.889419	1	FALSE
1	80682982	80684058	HMGB1P18	ENSG00000236407	-64978	80749037	80749655	+	768	2	FALSE	0.0972113	4.22335	0.875429	1	FALSE	0.73647	4.22339	0.00115732	1	FALSE	-0.88085	4.22337	0.000212652	1	FALSE	0.655622	4.22338	0.00947259	1	FALSE	-1.02521	4.22338	0.0253084	1	FALSE	-0.629856	4.2234	0.0311174	1	FALSE	-0.384874	4.22326	0.508183	1	FALSE
1	80905107	80905948	HNRNPA1P64	ENSG00000213559	10819	80916768	80917689	-	768	0	FALSE	-0.509424	4.18231	0.0654838	1	FALSE	0.428398	4.18231	0.0520373	1	FALSE	-0.752662	4.18231	0.000302543	1	FALSE	0.716245	4.18231	0.00119407	1	FALSE	-0.834402	4.18231	0.090773	1	FALSE	0.0522936	4.18231	1	1	FALSE	-0.0524154	4.18233	1	1	FALSE
1	81121392	81123391	RP5-887A10.1	ENSG00000234184	8918	81106969	81112473	+	768	243	TRUE	-0.295011	6.9867	0.277898	1	FALSE	0.470125	6.98674	0.0109524	1	FALSE	-0.636271	6.98671	0.00128496	1	FALSE	1.49868	6.98672	3.32102e-16	4.37312e-12	TRUE	-4.63303	6.98672	2.74637e-18	3.63592e-14	TRUE	-1.98105	6.98674	1.43736e-15	1.8289e-11	TRUE	-0.124911	6.98661	0.705079	1	FALSE
1	81234744	81235312	RP5-887A10.1	ENSG00000234184	122270	81106969	81112473	+	768	11	FALSE	-0.54914	4.44944	0.115314	1	FALSE	0.0253	4.44947	0.958715	1	FALSE	0.799756	4.44945	0.0001648	1	FALSE	0.519571	4.44946	0.045097	1	FALSE	-2.43668	4.44946	2.47584e-05	0.295714	FALSE	-1.59677	4.44947	2.81984e-07	0.00325635	FALSE	-0.0494425	4.44937	0.928157	1	FALSE
1	81357391	81361915	MTND2P30	ENSG00000227937	-184559	81546475	81546856	+	768	6	FALSE	-1.23302	4.93109	5.48726e-05	0.621762	FALSE	0.330873	4.93124	0.10153	1	FALSE	-1.59318	4.93115	9.19969e-12	1.19596e-07	FALSE	1.57203	4.93119	5.33293e-16	7.01708e-12	FALSE	-3.28275	4.93118	1.10623e-09	1.42194e-05	FALSE	-0.147045	4.93126	0.617396	1	FALSE	0.137211	4.93074	0.689847	1	FALSE
1	81363842	81365165	MTND2P30	ENSG00000227937	-181309	81546475	81546856	+	768	6	FALSE	-1.39179	4.36449	2.73161e-05	0.314054	FALSE	0.628378	4.3645	0.00295899	1	FALSE	-1.20704	4.36449	4.52032e-07	0.00551569	FALSE	0.757295	4.3645	0.00111897	1	FALSE	-1.05278	4.3645	0.0277498	1	FALSE	0.475285	4.3645	0.0415634	1	FALSE	-0.127437	4.36445	0.631426	1	FALSE
1	81374783	81378094	MTND2P30	ENSG00000227937	-168380	81546475	81546856	+	768	6	FALSE	-2.00621	4.96627	4.92196e-07	0.00599495	FALSE	0.315443	4.96648	0.179929	1	FALSE	-1.71947	4.96635	9.80482e-10	1.25286e-05	FALSE	2.10402	4.96641	1.01661e-20	1.3522e-16	FALSE	-2.55375	4.96639	1.80002e-05	0.216164	FALSE	-1.09467	4.9665	0.000734591	1	FALSE	0.107078	4.96578	0.734566	1	FALSE
1	81425286	81429135	MTND2P30	ENSG00000227937	-117339	81546475	81546856	+	768	58	TRUE	-2.20578	6.14878	2.16431e-09	2.74933e-05	TRUE	1.05832	6.14878	8.0101e-07	0.00926608	TRUE	-2.05009	6.14878	5.94214e-16	7.87512e-12	TRUE	1.15224	6.14878	7.28025e-07	0.00868679	TRUE	-3.20266	6.14878	2.05118e-08	0.000260336	TRUE	-0.0989285	6.14878	0.749581	1	FALSE	0.241872	6.14879	0.451312	1	FALSE
1	81623602	81625156	RP3-445O10.1	ENSG00000235089	-49096	81674253	81674895	+	768	0	FALSE	-0.539046	4.15137	0.046267	1	FALSE	0.118609	4.15138	0.652206	1	FALSE	0.173339	4.15137	0.351074	1	FALSE	0.224611	4.15137	0.427623	1	FALSE	-0.0786468	4.15137	0.960974	1	FALSE	-0.124772	4.15138	0.748267	1	FALSE	-0.287593	4.15137	0.458347	1	FALSE
1	81625350	81626981	RP3-445O10.1	ENSG00000235089	-47271	81674253	81674895	+	768	0	FALSE	-0.468326	4.15971	0.11608	1	FALSE	0.156764	4.1597	0.616595	1	FALSE	-0.137566	4.1597	0.629862	1	FALSE	0.26096	4.1597	0.199763	1	FALSE	-0.299411	4.1597	0.757243	1	FALSE	0.0713363	4.1597	0.981181	1	FALSE	0.0719537	4.15973	0.928378	1	FALSE
1	81648595	81649677	RP3-445O10.1	ENSG00000235089	-24575	81674253	81674895	+	768	0	FALSE	-0.115111	4.16894	0.921063	1	FALSE	-0.356437	4.16894	0.116372	1	FALSE	-0.512561	4.16894	0.00904653	1	FALSE	0.490873	4.16894	0.0244194	1	FALSE	-0.248062	4.16894	1	1	FALSE	0.50013	4.16894	0.0330315	1	FALSE	0.135406	4.16894	0.876529	1	FALSE
1	81691024	81693096	RP3-445O10.1	ENSG00000235089	16128	81674253	81674895	+	768	0	FALSE	-0.625365	4.20975	0.115529	1	FALSE	0.212013	4.20976	0.443998	1	FALSE	-0.854341	4.20975	0.00103546	1	FALSE	1.20135	4.20976	2.25482e-06	0.0265189	FALSE	-0.28809	4.20975	0.741632	1	FALSE	-0.374014	4.20976	0.273635	1	FALSE	-0.250791	4.20972	0.78395	1	FALSE
1	81701965	81707211	RN7SKP247	ENSG00000223026	-10262	81717474	81717781	+	768	3	FALSE	-0.689215	4.75076	0.0339771	1	FALSE	0.303499	4.75093	0.153622	1	FALSE	-1.86227	4.75082	2.11285e-13	2.77354e-09	FALSE	1.73823	4.75088	1.27993e-16	1.68682e-12	FALSE	-1.98745	4.75086	0.00020067	1	FALSE	-0.67204	4.75096	0.0225613	1	FALSE	0.112966	4.75033	0.810775	1	FALSE
1	81769013	81771344	LPHN2	ENSG00000117114	-500	81771845	82201015	+	768	3	FALSE	-1.19894	4.40913	0.00890701	1	FALSE	0.598519	4.40919	0.0293418	1	FALSE	-2.03771	4.40915	1.23744e-11	1.60707e-07	FALSE	1.64344	4.40917	1.34765e-09	1.69387e-05	FALSE	-2.26367	4.40916	0.000461959	1	FALSE	-0.376855	4.40919	0.271884	1	FALSE	-0.129202	4.409	0.783967	1	FALSE
1	82573214	82577648	RP11-147G16.1	ENSG00000233290	103255	82680904	82726817	-	768	0	FALSE	0.267846	4.28923	0.418625	1	FALSE	-0.227193	4.28923	0.317974	1	FALSE	-0.106958	4.28923	0.957603	1	FALSE	0.222513	4.28923	0.357599	1	FALSE	-0.846366	4.28923	0.0255093	1	FALSE	0.0177655	4.28923	0.97082	1	FALSE	0.282989	4.28922	0.373003	1	FALSE
1	82617010	82620301	RP11-147G16.1	ENSG00000233290	60602	82680904	82726817	-	768	9	FALSE	0.0649248	5.33721	0.77588	1	FALSE	0.639787	5.33729	0.00127929	1	FALSE	0.0703967	5.33724	0.69045	1	FALSE	-0.17839	5.33727	0.488195	1	FALSE	-1.49925	5.33726	0.001045	1	FALSE	-0.701106	5.3373	0.00541175	1	FALSE	0.113324	5.337	0.722856	1	FALSE
1	82627206	82627979	RP11-147G16.1	ENSG00000233290	52924	82680904	82726817	-	768	0	FALSE	0.0441112	4.26345	0.81076	1	FALSE	0.452087	4.26347	0.0375197	1	FALSE	0.334677	4.26346	0.0905057	1	FALSE	-0.380426	4.26346	0.177446	1	FALSE	-0.613287	4.26346	0.170966	1	FALSE	-0.680292	4.26347	0.00809484	1	FALSE	-0.0150509	4.26341	1	1	FALSE
1	82744243	82745379	RP11-147G16.1	ENSG00000233290	-17425	82680904	82726817	-	768	135	TRUE	-0.503123	6.05512	0.189913	1	FALSE	0.692849	6.05517	0.00525444	1	FALSE	0.0801727	6.05513	0.721592	1	FALSE	-0.0877549	6.05515	0.80244	1	FALSE	-1.0215	6.05514	0.0735658	1	FALSE	-0.317035	6.05517	0.320259	1	FALSE	-0.23433	6.055	0.597618	1	FALSE
1	82803043	82804032	RP11-147G16.1	ENSG00000233290	-76225	82680904	82726817	-	768	16	FALSE	-1.54143	4.51012	0.00170692	1	FALSE	-1.88118	4.5101	1.54951e-07	0.00183276	FALSE	1.9176	4.51011	9.32569e-12	1.21215e-07	FALSE	-0.485689	4.51011	0.241126	1	FALSE	0.0612817	4.51011	0.890054	1	FALSE	-1.44279	4.5101	0.00052183	1	FALSE	0.675448	4.51015	0.125275	1	FALSE
1	82906002	82906895	RP11-147G16.1	ENSG00000233290	-179184	82680904	82726817	-	768	1	FALSE	-0.309586	4.14389	0.393355	1	FALSE	-0.502622	4.1439	0.00492463	1	FALSE	0.722425	4.14389	4.31377e-05	0.489139	FALSE	-0.321417	4.1439	0.116947	1	FALSE	0.787124	4.1439	0.0187526	1	FALSE	-0.473792	4.14391	0.0297405	1	FALSE	-0.0517423	4.14385	1	1	FALSE
1	82935261	82936026	RP11-147G16.1	ENSG00000233290	-208443	82680904	82726817	-	768	0	FALSE	0.0152467	4.12998	0.99032	1	FALSE	-0.00980365	4.12998	1	1	FALSE	0.27171	4.12998	0.0813858	1	FALSE	-0.270267	4.12998	0.148378	1	FALSE	-0.0142779	4.12998	1	1	FALSE	-0.26346	4.12998	0.204575	1	FALSE	0.206045	4.12997	0.640399	1	FALSE
1	82975839	82977026	RP11-147G16.1	ENSG00000233290	-249021	82680904	82726817	-	768	0	FALSE	0.159577	4.21345	0.61823	1	FALSE	-0.481012	4.21345	0.0661606	1	FALSE	0.0800244	4.21345	0.810342	1	FALSE	0.467894	4.21345	0.0460248	1	FALSE	0.796621	4.21345	0.0335441	1	FALSE	-0.759269	4.21345	0.0100798	1	FALSE	-0.0972899	4.21345	0.914217	1	FALSE
1	83043560	83044929	RP11-147G16.1	ENSG00000233290	-316742	82680904	82726817	-	768	0	FALSE	-0.0880552	4.17446	1	1	FALSE	-0.309536	4.17446	0.148203	1	FALSE	0.212548	4.17446	0.222694	1	FALSE	-0.0317026	4.17446	1	1	FALSE	0.119035	4.17446	1	1	FALSE	0.190813	4.17445	0.526782	1	FALSE	-0.164266	4.17448	0.612616	1	FALSE
1	83114043	83114714	RP4-601K24.1	ENSG00000230817	-254151	83368866	83632498	+	768	0	FALSE	0.102227	4.12799	0.763356	1	FALSE	-0.0377587	4.12799	1	1	FALSE	0.15539	4.12799	0.247497	1	FALSE	-0.037325	4.12799	1	1	FALSE	0.0175166	4.12799	0.964643	1	FALSE	-0.223413	4.12799	0.285186	1	FALSE	-0.031372	4.12798	1	1	FALSE
1	83186993	83188201	RP4-601K24.1	ENSG00000230817	-180664	83368866	83632498	+	768	0	FALSE	-0.0509441	4.17912	1	1	FALSE	0.322691	4.17913	0.181636	1	FALSE	-0.333557	4.17912	0.116793	1	FALSE	0.224592	4.17913	0.346845	1	FALSE	-0.864573	4.17912	0.0794087	1	FALSE	-0.0336376	4.17913	1	1	FALSE	0.13511	4.17908	0.912346	1	FALSE
1	83261275	83262926	RP4-601K24.1	ENSG00000230817	-105939	83368866	83632498	+	768	5	FALSE	1.05697	4.28146	0.000122377	1	FALSE	-0.734533	4.28145	0.00267595	1	FALSE	-0.948624	4.28146	0.000323881	1	FALSE	0.564615	4.28145	0.0267585	1	FALSE	-1.05748	4.28146	0.0153759	1	FALSE	0.405804	4.28145	0.109866	1	FALSE	0.0190925	4.28149	1	1	FALSE
1	83736581	83737018	RP4-601K24.1	ENSG00000230817	104082	83368866	83632498	+	768	2	FALSE	-0.332102	4.15929	0.264017	1	FALSE	-0.190454	4.1593	0.522021	1	FALSE	-0.0180251	4.15929	0.864819	1	FALSE	0.304634	4.15929	0.19183	1	FALSE	-0.392338	4.15929	0.690058	1	FALSE	0.115027	4.1593	0.727155	1	FALSE	0.269101	4.15926	0.306498	1	FALSE
1	83737042	83738005	RP4-601K24.1	ENSG00000230817	104543	83368866	83632498	+	768	0	FALSE	-0.50966	4.21675	0.14717	1	FALSE	-0.0317097	4.21677	0.784362	1	FALSE	-0.17552	4.21676	0.5138	1	FALSE	0.913037	4.21676	5.18542e-06	0.0602442	FALSE	-0.789113	4.21676	0.0815991	1	FALSE	-0.183723	4.21677	0.578185	1	FALSE	-0.324141	4.2167	0.342627	1	FALSE
1	83868426	83869902	RP11-413G15.1	ENSG00000231364	-41833	83911736	83920454	+	768	1	FALSE	-0.599749	4.28248	0.0819496	1	FALSE	0.130679	4.28251	0.658662	1	FALSE	-0.343322	4.28249	0.124816	1	FALSE	0.580623	4.2825	0.00618645	1	FALSE	-0.0980726	4.2825	0.975159	1	FALSE	-0.362385	4.28251	0.329113	1	FALSE	0.44031	4.28242	0.208925	1	FALSE
1	83870536	83874028	RP11-413G15.1	ENSG00000231364	-37707	83911736	83920454	+	768	1	FALSE	-0.236444	4.70957	0.420094	1	FALSE	-0.431477	4.70963	0.0154238	1	FALSE	-0.689495	4.70959	0.000519466	1	FALSE	1.18314	4.70961	7.21233e-12	9.28804e-08	FALSE	-0.802912	4.70961	0.0410948	1	FALSE	0.0410003	4.70964	0.738493	1	FALSE	0.0957658	4.70944	0.841919	1	FALSE
1	84465334	84465833	TTLL7	ENSG00000137941	-500	84330711	84464833	-	768	149	TRUE	1.53721	5.29751	6.45608e-19	8.58917e-15	TRUE	-0.104417	5.29757	0.538098	1	FALSE	-0.667584	5.29753	0.00012703	1	FALSE	0.0962674	5.29755	0.590864	1	FALSE	-2.32987	5.29754	3.52511e-09	4.50721e-05	TRUE	-0.309979	5.29758	0.111398	1	FALSE	-0.332662	5.29735	0.236543	1	FALSE
1	84466162	84467904	TTLL7	ENSG00000137941	-1328	84330711	84464833	-	768	7	FALSE	1.65332	4.88771	4.43943e-19	5.90799e-15	FALSE	0.00889017	4.88776	1	1	FALSE	-0.935897	4.88773	1.08757e-06	0.0131095	FALSE	-0.183182	4.88775	0.421914	1	FALSE	-1.97739	4.88774	1.41778e-05	0.170786	FALSE	-0.0287355	4.88777	0.957443	1	FALSE	-0.516792	4.88757	0.093416	1	FALSE
1	84736703	84739293	SNORA2	ENSG00000199959	-3710	84743004	84743140	+	768	0	FALSE	0.0782042	4.40846	0.863759	1	FALSE	-0.736442	4.40851	0.000606202	1	FALSE	0.871309	4.40848	4.28218e-07	0.00523026	FALSE	-0.576503	4.4085	0.0119747	1	FALSE	0.328243	4.40849	0.474913	1	FALSE	-0.471133	4.40852	0.0596716	1	FALSE	0.255708	4.40832	0.376032	1	FALSE
1	84754246	84755799	SAMD13	ENSG00000203943	-8249	84764049	84816479	+	768	1	FALSE	-0.571116	4.54852	0.0404055	1	FALSE	-0.438179	4.54854	0.0466202	1	FALSE	1.23465	4.54853	4.88362e-12	6.36091e-08	FALSE	-0.3497	4.54854	0.216959	1	FALSE	0.0425042	4.54853	0.875307	1	FALSE	-0.932172	4.54855	0.000416887	1	FALSE	-0.197217	4.54848	0.566148	1	FALSE
1	84898864	84901557	DNASE2B	ENSG00000137976	18162	84864215	84880701	+	768	0	FALSE	-0.465613	4.32413	0.173407	1	FALSE	0.150186	4.32415	0.622844	1	FALSE	-0.0707165	4.32413	0.864005	1	FALSE	0.34066	4.32414	0.0739543	1	FALSE	0.0114317	4.32414	1	1	FALSE	-0.333723	4.32415	0.214169	1	FALSE	0.189137	4.32407	0.705306	1	FALSE
1	85040664	85041068	CTBS	ENSG00000117151	-500	85018804	85040163	-	768	226	TRUE	-0.383	5.61805	0.0221113	1	FALSE	-0.836735	5.6181	7.30517e-11	9.22862e-07	TRUE	-0.347334	5.61807	0.00347887	1	FALSE	-0.56506	5.61809	5.557e-05	0.614994	FALSE	0.559793	5.61808	0.00751925	1	FALSE	1.03368	5.61811	4.29378e-18	5.53555e-14	TRUE	0.805341	5.61793	5.47356e-07	0.0072886	TRUE
1	85048572	85050853	CTBS	ENSG00000117151	-8408	85018804	85040163	-	768	418	TRUE	-0.505644	7.63142	0.000450945	1	FALSE	-0.761072	7.63139	1.14896e-12	1.47642e-08	TRUE	-0.305464	7.63141	0.00275597	1	FALSE	-0.267028	7.6314	0.0228692	1	FALSE	1.31005	7.6314	6.62638e-16	8.73623e-12	TRUE	0.543346	7.63139	1.08999e-06	0.0123845	FALSE	0.673969	7.63149	2.58682e-06	0.0343608	FALSE
1	85063959	85066687	CTBS	ENSG00000117151	-23795	85018804	85040163	-	768	3	FALSE	-0.281634	4.43522	0.375024	1	FALSE	-0.710154	4.43523	0.000363865	1	FALSE	-0.520924	4.43522	0.00730253	1	FALSE	-0.251217	4.43523	0.290705	1	FALSE	0.360734	4.43522	0.343771	1	FALSE	1.44127	4.43523	1.04929e-16	1.34319e-12	FALSE	-0.433778	4.43518	0.143966	1	FALSE
1	85069427	85070369	C1orf180	ENSG00000180869	23543	85093913	85097431	-	768	1	FALSE	-0.738688	4.24055	0.0187436	1	FALSE	-0.127287	4.24055	0.545121	1	FALSE	-0.448007	4.24055	0.04135	1	FALSE	-0.23387	4.24055	0.417079	1	FALSE	0.184035	4.24055	0.641593	1	FALSE	1.15235	4.24055	6.54486e-08	0.000767778	FALSE	-0.16023	4.24056	0.631862	1	FALSE
1	85086130	85087090	C1orf180	ENSG00000180869	6822	85093913	85097431	-	768	13	FALSE	-0.0912818	4.61709	0.924077	1	FALSE	-0.676818	4.61711	0.000616101	1	FALSE	-0.150593	4.61709	0.357677	1	FALSE	-0.654833	4.6171	0.00508504	1	FALSE	0.924384	4.6171	0.00208509	1	FALSE	1.13362	4.61711	5.49459e-10	6.69351e-06	FALSE	-0.721885	4.61703	0.0276684	1	FALSE
1	85156987	85157272	SSX2IP	ENSG00000117155	-500	85131802	85156486	-	768	356	TRUE	-0.16031	5.45391	0.284969	1	FALSE	-0.0961348	5.45398	0.544982	1	FALSE	0.406223	5.45393	0.00010672	1	FALSE	0.51508	5.45396	1.26033e-05	0.144056	FALSE	0.0641416	5.45395	0.782091	1	FALSE	-1.08836	5.45399	6.15878e-15	7.80749e-11	TRUE	-0.367725	5.45375	0.0602911	1	FALSE
1	85667230	85668024	SYDE2	ENSG00000097096	-500	85622556	85666729	-	768	35	FALSE	0.904828	4.61141	3.41152e-05	0.390619	FALSE	-0.710706	4.61148	0.000536551	1	FALSE	-0.293709	4.61143	0.161746	1	FALSE	0.0598756	4.61145	0.802518	1	FALSE	-0.262999	4.61145	0.665869	1	FALSE	0.330821	4.61149	0.0945648	1	FALSE	-0.136082	4.61125	0.581506	1	FALSE
1	86174617	86174852	ZNHIT6	ENSG00000117174	-500	86115106	86174116	-	768	14	FALSE	0.805138	4.19001	0.00222375	1	FALSE	-0.304827	4.19005	0.206216	1	FALSE	-0.597301	4.19002	0.0127671	1	FALSE	-0.0668675	4.19003	0.779846	1	FALSE	0.746879	4.19003	0.0279069	1	FALSE	0.168667	4.19005	0.469589	1	FALSE	-0.438139	4.18993	0.279989	1	FALSE
1	86713230	86713956	COL24A1	ENSG00000171502	-90603	86591775	86622626	-	768	2	FALSE	-0.417793	4.20184	0.211143	1	FALSE	-0.726642	4.20188	0.0016969	1	FALSE	-0.169848	4.20185	0.705247	1	FALSE	-0.637508	4.20186	0.0138384	1	FALSE	2.59261	4.20186	2.06834e-25	2.75586e-21	FALSE	-0.326375	4.20188	0.291491	1	FALSE	-0.194533	4.20175	0.608415	1	FALSE
1	86736267	86737467	ODF2L	ENSG00000122417	76876	86814344	86861945	-	768	13	FALSE	0.0890666	5.02521	0.563498	1	FALSE	0.168922	5.02524	0.286379	1	FALSE	0.160927	5.02522	0.212897	1	FALSE	-0.150197	5.02523	0.382988	1	FALSE	0.40141	5.02523	0.0798891	1	FALSE	-0.561158	5.02524	0.00156802	1	FALSE	-0.100011	5.02515	0.61693	1	FALSE
1	86862524	86863021	ODF2L	ENSG00000122417	-500	86814421	86862023	-	768	3	FALSE	0.0456699	4.26659	1	1	FALSE	-0.693182	4.26662	0.0016502	1	FALSE	-0.572806	4.2666	0.00587447	1	FALSE	0.678784	4.26661	0.000973705	1	FALSE	-0.406498	4.26661	0.403405	1	FALSE	0.734031	4.26663	0.000132765	1	FALSE	-0.360959	4.26651	0.352219	1	FALSE
1	87219022	87219810	SH3GLB1	ENSG00000097033	5154	87170259	87213867	+	768	0	FALSE	-0.317168	4.29684	0.159524	1	FALSE	-0.313914	4.29686	0.0419281	1	FALSE	0.0584215	4.29685	0.707516	1	FALSE	-0.490404	4.29685	0.047506	1	FALSE	-0.431748	4.29685	0.328326	1	FALSE	0.990069	4.29686	9.68949e-08	0.00113164	FALSE	-0.105007	4.29678	1	1	FALSE
1	87219871	87222889	SH3GLB1	ENSG00000097033	6003	87170259	87213867	+	768	0	FALSE	-0.0346808	4.53708	0.975464	1	FALSE	-0.229535	4.53708	0.139902	1	FALSE	0.139462	4.53708	0.329028	1	FALSE	-0.871448	4.53708	1.808e-05	0.205407	FALSE	-0.493099	4.53708	0.264004	1	FALSE	0.820708	4.53708	8.93935e-06	0.098458	FALSE	0.106266	4.53708	0.636176	1	FALSE
1	87239103	87241062	RP4-612B15.2	ENSG00000230721	-9533	87250596	87251150	+	768	1	FALSE	-0.205606	4.28467	0.448121	1	FALSE	-0.951149	4.28468	2.49692e-05	0.271066	FALSE	-0.287136	4.28468	0.210949	1	FALSE	-0.0606721	4.28468	0.861596	1	FALSE	-0.0664574	4.28468	1	1	FALSE	0.288291	4.28468	0.301025	1	FALSE	1.48438	4.28465	2.48496e-10	3.32612e-06	FALSE
1	87668055	87669605	RP5-1052I5.2	ENSG00000267561	33170	87458692	87634884	+	768	0	FALSE	0.0552103	4.23288	1	1	FALSE	0.658235	4.23289	0.00203955	1	FALSE	-0.27811	4.23288	0.157335	1	FALSE	-0.839341	4.23289	0.000733163	1	FALSE	-1.05069	4.23289	0.044125	1	FALSE	0.594076	4.2329	0.00276781	1	FALSE	-0.452091	4.23284	0.174727	1	FALSE
1	87792869	87793650	LMO4	ENSG00000143013	-500	87794151	87814606	+	768	14	FALSE	0.947895	4.60693	1.44681e-06	0.0174298	FALSE	-0.36325	4.60707	0.0782699	1	FALSE	-0.262111	4.60698	0.21246	1	FALSE	-0.0251837	4.60703	0.919812	1	FALSE	-0.0322512	4.60701	0.995466	1	FALSE	-0.11205	4.60709	0.566756	1	FALSE	-0.115855	4.60657	0.66667	1	FALSE
1	87857915	87861100	RP4-544H6.2	ENSG00000227290	-20576	87819207	87837338	-	768	77	TRUE	0.149582	6.60595	0.256928	1	FALSE	-0.181732	6.60599	0.104048	1	FALSE	-0.394136	6.60597	0.000191764	1	FALSE	0.913374	6.60598	5.60864e-19	7.43874e-15	TRUE	-0.602629	6.60598	0.00514792	1	FALSE	-0.207566	6.606	0.0878594	1	FALSE	-0.368242	6.60586	0.0171065	1	FALSE
1	87875317	87878588	RP4-544H6.2	ENSG00000227290	-37978	87819207	87837338	-	768	9	FALSE	-0.118889	5.10489	0.670243	1	FALSE	-0.721944	5.105	0.000104725	1	FALSE	-0.506741	5.10493	0.00472989	1	FALSE	1.52551	5.10497	2.23914e-24	2.99014e-20	FALSE	-0.617077	5.10495	0.0688067	1	FALSE	-0.598423	5.10501	0.00290821	1	FALSE	-0.0573274	5.10463	0.782241	1	FALSE
1	87912932	87913922	RNA5SP52	ENSG00000199318	5000	87918923	87919056	-	768	5	FALSE	0.0840988	4.47536	0.666631	1	FALSE	0.102627	4.47541	0.681001	1	FALSE	0.246078	4.47538	0.0688194	1	FALSE	0.153247	4.4754	0.433078	1	FALSE	-0.754683	4.47539	0.0202473	1	FALSE	-0.470725	4.47542	0.0288281	1	FALSE	-0.143455	4.47522	0.5269	1	FALSE
1	87928826	87930906	RNA5SP52	ENSG00000199318	-9769	87918923	87919056	-	768	28	FALSE	0.235105	5.90586	0.0627544	1	FALSE	-0.11703	5.90587	0.247394	1	FALSE	0.0504235	5.90586	0.566628	1	FALSE	0.251063	5.90587	0.0173462	1	FALSE	-0.843922	5.90587	8.38752e-05	0.981256	FALSE	-0.0643122	5.90587	0.592649	1	FALSE	-0.15827	5.90583	0.266679	1	FALSE
1	88051812	88055474	RNA5SP52	ENSG00000199318	-132755	87918923	87919056	-	768	5	FALSE	1.28565	4.42742	2.70938e-09	3.4374e-05	FALSE	-0.757099	4.42755	0.000770172	1	FALSE	-0.526692	4.42747	0.0266141	1	FALSE	0.424411	4.42751	0.043154	1	FALSE	0.660408	4.42749	0.0658389	1	FALSE	-0.701154	4.42756	0.00624694	1	FALSE	-0.523519	4.42712	0.115768	1	FALSE
1	88055970	88061680	RNA5SP52	ENSG00000199318	-136913	87918923	87919056	-	768	3	FALSE	1.06695	4.58952	3.02055e-05	0.346759	FALSE	-0.957048	4.5897	0.000195178	1	FALSE	-0.839504	4.58958	0.000454213	1	FALSE	-0.432058	4.58964	0.0864461	1	FALSE	2.31608	4.58962	7.67906e-17	1.0144e-12	FALSE	-0.556894	4.58973	0.0639473	1	FALSE	-0.462647	4.58907	0.23625	1	FALSE
1	88065430	88067200	RNA5SP52	ENSG00000199318	-146373	87918923	87919056	-	768	0	FALSE	0.183205	4.22605	0.534817	1	FALSE	0.524126	4.22607	0.00712474	1	FALSE	-0.557571	4.22606	0.0128144	1	FALSE	0.191501	4.22606	0.337838	1	FALSE	0.441448	4.22606	0.281545	1	FALSE	-0.588097	4.22607	0.021609	1	FALSE	-0.239799	4.226	0.407828	1	FALSE
1	88107454	88111298	RNA5SP52	ENSG00000199318	-188397	87918923	87919056	-	768	0	FALSE	-0.144685	4.13871	0.542508	1	FALSE	0.0750153	4.13871	0.473805	1	FALSE	0.0568787	4.13871	0.873838	1	FALSE	-0.144165	4.13871	0.514273	1	FALSE	0.424763	4.13871	0.223383	1	FALSE	-0.179848	4.13871	0.591562	1	FALSE	0.0938114	4.1387	1	1	FALSE
1	88182802	88183847	RP5-1027O11.1	ENSG00000224235	181744	88365592	88371397	-	768	0	FALSE	0.0929152	4.12598	0.600797	1	FALSE	-0.0155057	4.12598	1	1	FALSE	-0.0403491	4.12598	1	1	FALSE	0.108857	4.12598	0.430285	1	FALSE	-0.166449	4.12598	1	1	FALSE	-0.0764902	4.12598	1	1	FALSE	0.0275195	4.12598	1	1	FALSE
1	88228937	88230651	RP5-1027O11.1	ENSG00000224235	134940	88365592	88371397	-	768	1	FALSE	-0.471283	4.37201	0.136053	1	FALSE	0.549562	4.37199	0.00668921	1	FALSE	0.519237	4.37201	0.00555475	1	FALSE	-0.125076	4.372	0.639625	1	FALSE	-0.704715	4.372	0.0754144	1	FALSE	-0.810444	4.37199	0.00139444	1	FALSE	-0.433299	4.37206	0.218621	1	FALSE
1	88278169	88280503	RP5-1027O11.1	ENSG00000224235	85088	88365592	88371397	-	768	1	FALSE	-1.0627	4.64287	0.000289054	1	FALSE	0.872302	4.64288	1.26813e-06	0.014567	FALSE	0.377428	4.64287	0.0335473	1	FALSE	-0.035196	4.64288	0.954489	1	FALSE	-1.31178	4.64288	0.00235076	1	FALSE	-1.34146	4.64288	5.15938e-08	0.000607156	FALSE	0.146428	4.64285	0.693585	1	FALSE
1	88291946	88293189	RP5-1027O11.1	ENSG00000224235	72402	88365592	88371397	-	768	64	TRUE	-0.92801	5.37051	0.000717753	1	FALSE	0.475484	5.37052	0.00756989	1	FALSE	0.537576	5.37051	0.00171188	1	FALSE	0.551636	5.37052	0.00476462	1	FALSE	-0.618119	5.37052	0.114666	1	FALSE	-1.95615	5.37052	5.76879e-16	7.35694e-12	TRUE	-0.352966	5.37047	0.231582	1	FALSE
1	88329950	88330842	RP5-1027O11.1	ENSG00000224235	34749	88365592	88371397	-	768	0	FALSE	-0.0709263	4.13808	1	1	FALSE	0.338332	4.13808	0.117571	1	FALSE	-0.0748584	4.13808	0.909224	1	FALSE	-0.0691021	4.13808	1	1	FALSE	-0.0683748	4.13808	1	1	FALSE	-0.0182873	4.13808	1	1	FALSE	-0.320665	4.13809	0.30443	1	FALSE
1	88510704	88511316	RP5-1027O11.1	ENSG00000224235	-139306	88365592	88371397	-	768	0	FALSE	-0.112193	4.13308	0.897805	1	FALSE	-0.0191146	4.13308	1	1	FALSE	0.49104	4.13308	0.00149987	1	FALSE	-0.303617	4.13308	0.121526	1	FALSE	-0.270291	4.13308	0.879152	1	FALSE	-0.0892474	4.13308	0.951177	1	FALSE	-0.277433	4.13308	0.520771	1	FALSE
1	88657158	88657971	CTA-21C21.1	ENSG00000270507	-120864	88778836	88778985	+	768	0	FALSE	0.0234566	4.12226	1	1	FALSE	0.139795	4.12226	0.74939	1	FALSE	0.0304887	4.12226	0.832029	1	FALSE	-0.0203284	4.12226	1	1	FALSE	-0.107706	4.12226	1	1	FALSE	-0.11805	4.12226	0.735147	1	FALSE	-0.109902	4.12226	1	1	FALSE
1	89358128	89358232	GTF2B	ENSG00000137947	-500	89329727	89357627	-	768	58	TRUE	0.662017	4.35226	0.0533589	1	FALSE	0.708777	4.35224	0.00782137	1	FALSE	-0.235462	4.35225	0.492944	1	FALSE	-0.315783	4.35225	0.345666	1	FALSE	-1.17122	4.35225	0.0504444	1	FALSE	-1.41635	4.35224	1.38955e-05	0.15203	FALSE	0.513363	4.3523	0.218286	1	FALSE
1	89459144	89459794	RBMXL1	ENSG00000213516	-500	89445142	89458643	-	768	406	TRUE	0.358268	6.07457	0.00441537	1	FALSE	-0.588473	6.07471	1.14195e-07	0.00135641	FALSE	-0.138105	6.07462	0.239754	1	FALSE	0.667186	6.07466	5.41146e-11	6.91314e-07	FALSE	0.171664	6.07465	0.3801	1	FALSE	-0.30967	6.07472	0.0044136	1	FALSE	-0.139464	6.07425	0.349816	1	FALSE
1	89489078	89489254	GBP3	ENSG00000117226	-500	89472953	89488577	-	768	37	FALSE	0.138314	4.33245	0.342901	1	FALSE	-0.0278422	4.33247	0.901243	1	FALSE	-0.360312	4.33245	0.064655	1	FALSE	0.461741	4.33246	0.00966521	1	FALSE	-0.543297	4.33246	0.114991	1	FALSE	0.0370242	4.33247	0.942346	1	FALSE	-0.0421192	4.3324	0.803286	1	FALSE
1	89531544	89531603	GBP1	ENSG00000117228	-500	89518002	89531043	-	768	34	FALSE	-0.234878	4.16285	0.230816	1	FALSE	-0.0567005	4.16284	0.682133	1	FALSE	-0.178785	4.16285	0.690378	1	FALSE	0.17415	4.16285	0.423933	1	FALSE	-0.633623	4.16285	0.185606	1	FALSE	0.204068	4.16284	0.546676	1	FALSE	0.453941	4.16286	0.186816	1	FALSE
1	89535484	89536304	GBP1	ENSG00000117228	-4440	89518002	89531043	-	768	0	FALSE	0.031374	4.20101	0.937864	1	FALSE	0.170553	4.20102	0.543022	1	FALSE	0.0168362	4.20102	1	1	FALSE	0.106784	4.20102	0.486148	1	FALSE	-0.424938	4.20102	0.363986	1	FALSE	-0.0727112	4.20102	0.627511	1	FALSE	-0.303684	4.20099	0.545332	1	FALSE
1	89665116	89667352	GBP4	ENSG00000162654	-500	89646831	89664615	-	768	6	FALSE	-0.56806	5.16421	0.018389	1	FALSE	0.390779	5.16426	0.0241777	1	FALSE	-0.353095	5.16423	0.0608585	1	FALSE	0.415251	5.16425	0.0264321	1	FALSE	-0.605339	5.16424	0.0838098	1	FALSE	0.0563966	5.16427	0.740562	1	FALSE	-0.116177	5.16409	0.719716	1	FALSE
1	89740438	89740770	GBP5	ENSG00000154451	-1893	89724638	89738544	-	768	10	FALSE	-0.631952	4.32281	0.0522866	1	FALSE	-0.0378794	4.32282	0.750792	1	FALSE	-0.424448	4.32282	0.0536955	1	FALSE	-0.0130084	4.32282	1	1	FALSE	-0.977534	4.32282	0.0673381	1	FALSE	0.941104	4.32283	2.01643e-05	0.219045	FALSE	0.243831	4.32279	0.444549	1	FALSE
1	89744654	89745479	GBP5	ENSG00000154451	-6109	89724638	89738544	-	768	8	FALSE	-0.892202	4.50496	0.00346757	1	FALSE	0.394171	4.50495	0.0772866	1	FALSE	0.00981426	4.50496	1	1	FALSE	-0.608657	4.50496	0.0241943	1	FALSE	-0.73511	4.50496	0.192234	1	FALSE	0.799832	4.50495	0.000619005	1	FALSE	-0.37127	4.50498	0.343114	1	FALSE
1	89764547	89766237	RP4-620F22.3	ENSG00000238081	-8526	89755359	89756020	-	768	9	FALSE	-0.381276	4.72824	0.122192	1	FALSE	0.0415141	4.72831	0.801084	1	FALSE	0.120129	4.72826	0.512359	1	FALSE	0.318893	4.72829	0.0762968	1	FALSE	-0.885503	4.72828	0.0178905	1	FALSE	-0.178168	4.72832	0.412404	1	FALSE	0.174276	4.72807	0.547317	1	FALSE
1	89774655	89777744	RP5-908D6.1	ENSG00000233235	-12460	89790205	89800563	+	768	4	FALSE	0.205265	4.9971	0.343097	1	FALSE	-0.624208	4.99718	7.16011e-05	0.756823	FALSE	-0.0453596	4.99713	0.904167	1	FALSE	-0.146802	4.99716	0.325919	1	FALSE	-0.606188	4.99715	0.0223043	1	FALSE	0.886729	4.99719	3.74603e-10	4.5754e-06	FALSE	-0.272606	4.99689	0.229412	1	FALSE
1	89815924	89816459	GBP6	ENSG00000183347	-13157	89829617	89852020	+	768	42	TRUE	0.77565	4.7738	0.00231005	1	FALSE	-0.0743124	4.77388	0.747456	1	FALSE	0.757325	4.77383	7.21423e-05	0.808715	FALSE	-0.420344	4.77385	0.0895838	1	FALSE	-1.05779	4.77384	0.0204028	1	FALSE	-1.18334	4.77389	1.20459e-05	0.132167	FALSE	-0.49435	4.77359	0.172368	1	FALSE
1	89823675	89824604	GBP6	ENSG00000183347	-5012	89829617	89852020	+	768	0	FALSE	-0.436647	4.20092	0.167705	1	FALSE	0.339738	4.20093	0.17851	1	FALSE	0.376827	4.20092	0.0318004	1	FALSE	-0.447929	4.20093	0.0904972	1	FALSE	-0.238662	4.20093	0.725263	1	FALSE	-0.258801	4.20093	0.269731	1	FALSE	0.131328	4.20089	0.819513	1	FALSE
1	89828537	89829116	GBP6	ENSG00000183347	-500	89829617	89852020	+	768	0	FALSE	-0.0447635	4.19316	1	1	FALSE	0.153243	4.19317	0.623748	1	FALSE	0.00403183	4.19316	1	1	FALSE	-0.136291	4.19317	0.706582	1	FALSE	-0.749893	4.19316	0.176488	1	FALSE	0.00423749	4.19317	0.881898	1	FALSE	0.361741	4.19313	0.402396	1	FALSE
1	89922648	89923689	GBP1P1	ENSG00000225492	30845	89875878	89891802	+	768	33	FALSE	-0.789643	5.17262	9.16313e-05	1	FALSE	0.037593	5.17261	0.922725	1	FALSE	0.238008	5.17261	0.0629185	1	FALSE	0.0996366	5.17261	0.430657	1	FALSE	-1.91474	5.17261	1.42595e-08	0.000181395	FALSE	0.362005	5.17261	0.0222453	1	FALSE	0.032666	5.17263	0.931711	1	FALSE
1	89989021	89989894	LRRC8B	ENSG00000197147	-500	89990395	90048520	+	768	337	TRUE	-0.533774	6.37801	4.12943e-06	0.0491072	FALSE	-0.146555	6.37805	0.109986	1	FALSE	0.0206168	6.37802	0.727977	1	FALSE	0.195645	6.37804	0.0384424	1	FALSE	0.106888	6.37803	0.542714	1	FALSE	0.22346	6.37806	0.0190664	1	FALSE	0.021185	6.37789	0.932405	1	FALSE
1	90422309	90423044	RP11-302M6.5	ENSG00000272672	16602	90405160	90405706	+	768	20	FALSE	-0.32259	5.01416	0.095701	1	FALSE	-0.179199	5.01421	0.179037	1	FALSE	-0.20216	5.01418	0.108976	1	FALSE	0.835127	5.01419	1.49971e-11	1.92548e-07	FALSE	-0.51162	5.01419	0.0535295	1	FALSE	-0.310384	5.01421	0.0571216	1	FALSE	0.152627	5.01405	0.536148	1	FALSE
1	90427585	90428230	RP11-302M6.5	ENSG00000272672	21878	90405160	90405706	+	768	60	TRUE	-0.776637	4.66038	0.000412983	1	FALSE	0.291727	4.66038	0.0457062	1	FALSE	-0.0374638	4.66038	0.778614	1	FALSE	0.602271	4.66038	2.47494e-05	0.279099	FALSE	-0.599925	4.66038	0.0464134	1	FALSE	-0.344755	4.66038	0.0396963	1	FALSE	-0.144592	4.66036	0.541257	1	FALSE
1	91188692	91189494	BARHL2	ENSG00000143032	-5897	91177096	91182794	-	768	6	FALSE	0.873145	4.32548	0.00469965	1	FALSE	0.623235	4.32547	0.0142398	1	FALSE	-0.478625	4.32548	0.0898139	1	FALSE	-1.05273	4.32547	0.00114886	1	FALSE	-1.39296	4.32547	0.0235528	1	FALSE	-0.223738	4.32547	0.52576	1	FALSE	0.415283	4.32548	0.295601	1	FALSE
1	91488330	91488975	RPL5P6	ENSG00000232393	-500	91489476	91490361	+	768	29	FALSE	0.36768	4.71425	0.0791828	1	FALSE	-0.250995	4.71436	0.195894	1	FALSE	0.019178	4.71429	0.787056	1	FALSE	-0.332263	4.71433	0.0434374	1	FALSE	-0.411074	4.71431	0.206165	1	FALSE	0.505493	4.71437	0.00315864	1	FALSE	-0.254317	4.714	0.294337	1	FALSE
1	92926925	92928507	GFI1	ENSG00000162676	11811	92940319	92949511	-	768	5	FALSE	0.0930967	4.46621	0.741807	1	FALSE	0.411164	4.46624	0.0391022	1	FALSE	-0.412975	4.46622	0.0400353	1	FALSE	-1.14447	4.46623	3.06518e-06	0.0358626	FALSE	-1.04531	4.46622	0.0142085	1	FALSE	0.967706	4.46624	1.60524e-06	0.0181296	FALSE	-0.138339	4.46612	0.698634	1	FALSE
1	92952934	92953879	GFI1	ENSG00000162676	-500	92940321	92952433	-	768	288	TRUE	0.482364	6.12122	0.000283948	1	FALSE	0.00977781	6.12127	0.925404	1	FALSE	-0.382245	6.12124	0.000319154	1	FALSE	0.0294421	6.12125	0.778368	1	FALSE	-1.04146	6.12125	6.79505e-06	0.0825803	FALSE	0.155832	6.12127	0.19189	1	FALSE	0.239044	6.1211	0.11881	1	FALSE
1	92967745	92968564	EVI5	ENSG00000067208	5688	92974253	93257961	-	768	20	FALSE	-0.116111	4.62647	0.45267	1	FALSE	0.217554	4.62645	0.110961	1	FALSE	-0.416289	4.62647	0.00103697	1	FALSE	-0.0102663	4.62646	1	1	FALSE	0.000210084	4.62646	0.787362	1	FALSE	0.52302	4.62645	0.000225446	1	FALSE	-0.440573	4.62652	0.0440723	1	FALSE
1	93427558	93430094	FAM69A	ENSG00000154511	-500	93307724	93427057	-	768	744	TRUE	-0.0982795	9.22046	0.369856	1	FALSE	-0.312325	9.22047	0.000194425	1	FALSE	-0.621194	9.22046	1.22767e-14	1.62052e-10	FALSE	0.551968	9.22047	7.42681e-11	9.47438e-07	FALSE	0.142112	9.22047	0.326941	1	FALSE	0.477901	9.22048	5.48322e-08	0.000644607	FALSE	-0.0907791	9.22042	0.45805	1	FALSE
1	93441181	93441951	RN7SL692P	ENSG00000239710	-500	93440386	93440680	-	768	143	TRUE	-0.889649	5.38402	2.54923e-05	0.293595	FALSE	-0.00173992	5.38412	0.944015	1	FALSE	-0.219979	5.38406	0.169541	1	FALSE	1.18479	5.38409	3.81283e-16	5.01998e-12	TRUE	-0.347034	5.38408	0.215591	1	FALSE	-0.825711	5.38413	7.09172e-06	0.0783777	FALSE	0.00974485	5.38378	0.956961	1	FALSE
1	93456116	93457014	AC093577.1	ENSG00000238787	-8250	93447794	93447865	-	768	200	TRUE	-1.62831	6.00882	5.9382e-09	7.49342e-05	TRUE	-0.0448061	6.00888	0.856636	1	FALSE	0.153547	6.00884	0.370767	1	FALSE	1.46467	6.00886	1.20196e-16	1.58418e-12	TRUE	-0.475596	6.00885	0.21211	1	FALSE	-1.96221	6.00889	1.43895e-16	1.84099e-12	TRUE	-0.123542	6.00869	0.683461	1	FALSE
1	93459076	93460015	AC093577.1	ENSG00000238787	-11210	93447794	93447865	-	768	252	TRUE	-1.71631	6.69937	4.16739e-10	5.33342e-06	TRUE	-0.0512553	6.69941	0.818062	1	FALSE	0.080381	6.69939	0.627958	1	FALSE	1.556	6.6994	1.11923e-19	1.48679e-15	TRUE	-0.787479	6.69939	0.0362625	1	FALSE	-1.90661	6.69941	2.14715e-16	2.7447e-12	TRUE	-0.0639658	6.69929	0.837426	1	FALSE
1	93469854	93471122	RNU6-210P	ENSG00000252752	-4691	93475814	93475908	+	768	0	FALSE	-0.550765	4.27176	0.0562251	1	FALSE	0.0851727	4.27178	0.567406	1	FALSE	-0.432521	4.27176	0.0814542	1	FALSE	1.28599	4.27177	1.1695e-10	1.48819e-06	FALSE	-0.259938	4.27177	0.427292	1	FALSE	-0.991344	4.27178	0.000123489	1	FALSE	-0.29071	4.27171	0.361188	1	FALSE
1	93486635	93487549	RN7SKP123	ENSG00000222664	-4259	93491809	93492099	+	768	1	FALSE	-0.432556	4.22063	0.234177	1	FALSE	0.113372	4.22064	0.653572	1	FALSE	-0.482465	4.22063	0.0324108	1	FALSE	1.19677	4.22064	5.29487e-09	6.60641e-05	FALSE	-0.708922	4.22064	0.233682	1	FALSE	-0.888664	4.22064	0.000859382	1	FALSE	0.0270404	4.2206	1	1	FALSE
1	93507467	93508935	Y_RNA	ENSG00000251837	-14403	93492967	93493063	-	768	2	FALSE	-0.0838438	4.45559	0.732586	1	FALSE	0.155935	4.45563	0.297443	1	FALSE	0.0926969	4.4556	0.501824	1	FALSE	0.0409876	4.45562	1	1	FALSE	-0.645337	4.45561	0.0338584	1	FALSE	-0.247592	4.45564	0.254254	1	FALSE	0.209286	4.45548	0.444853	1	FALSE
1	93527325	93528029	MTF2	ENSG00000143033	-16762	93544792	93604636	+	768	0	FALSE	-0.290384	4.14046	0.124193	1	FALSE	0.0222433	4.14047	1	1	FALSE	0.084174	4.14046	0.686711	1	FALSE	-0.168146	4.14047	0.80359	1	FALSE	-0.401623	4.14047	0.543716	1	FALSE	0.327502	4.14047	0.12767	1	FALSE	0.110344	4.14045	1	1	FALSE
1	93543945	93544291	MTF2	ENSG00000143033	-500	93544792	93604636	+	768	55	TRUE	0.453313	4.52189	0.0148612	1	FALSE	-0.597925	4.52198	0.00213515	1	FALSE	-0.348605	4.52192	0.0344372	1	FALSE	0.220636	4.52195	0.282973	1	FALSE	-0.213331	4.52194	0.389406	1	FALSE	0.610692	4.52199	0.000262616	1	FALSE	-0.344273	4.52168	0.226026	1	FALSE
1	94375467	94375836	GCLM	ENSG00000023909	-500	94350761	94374966	-	768	96	TRUE	0.330032	4.7012	0.0956338	1	FALSE	-0.912297	4.70128	1.07412e-07	0.00127712	TRUE	-0.149604	4.70123	0.494385	1	FALSE	0.818015	4.70126	1.11904e-08	0.00013885	TRUE	1.16902	4.70125	1.67938e-07	0.00210561	TRUE	-1.07225	4.7013	1.2904e-08	0.000153867	TRUE	-0.142117	4.70099	0.591622	1	FALSE
1	94882953	94883432	ABCD3	ENSG00000117528	-500	94883933	94984219	+	768	2	FALSE	0.436449	4.34054	0.0289898	1	FALSE	-0.637678	4.34059	0.00360554	1	FALSE	-0.132261	4.34055	0.508306	1	FALSE	0.255973	4.34057	0.242361	1	FALSE	0.257736	4.34057	0.525975	1	FALSE	-0.0197017	4.34059	0.950646	1	FALSE	0.123555	4.34042	0.547771	1	FALSE
1	95007857	95008690	F3	ENSG00000117525	-500	94994781	95007356	-	768	621	TRUE	0.542907	8.18843	0.000754619	1	FALSE	-0.88211	8.18845	1.16739e-10	1.47045e-06	TRUE	-0.758526	8.18844	1.04369e-08	0.000131359	TRUE	1.29825	8.18845	1.42241e-25	1.90134e-21	TRUE	0.37717	8.18845	0.0972043	1	FALSE	-0.724901	8.18846	3.80977e-06	0.0424866	FALSE	0.0210614	8.18839	0.890552	1	FALSE
1	95539002	95539372	ALG14	ENSG00000172339	-500	95439963	95538501	-	768	14	FALSE	0.983811	4.28697	2.51665e-06	0.0300991	FALSE	-0.891142	4.28703	0.000120113	1	FALSE	-0.175236	4.28699	0.414593	1	FALSE	0.31376	4.28701	0.127052	1	FALSE	0.393693	4.28701	0.214951	1	FALSE	-0.555429	4.28704	0.0122774	1	FALSE	0.0351514	4.28682	0.867047	1	FALSE
1	95550067	95550833	ALG14	ENSG00000172339	-11565	95439963	95538501	-	768	0	FALSE	-0.135727	4.15044	0.974927	1	FALSE	-0.149994	4.15043	0.507258	1	FALSE	0.484793	4.15043	0.0050851	1	FALSE	0.0912749	4.15043	0.633168	1	FALSE	-0.0178859	4.15043	1	1	FALSE	-0.32504	4.15043	0.195931	1	FALSE	-0.501016	4.15044	0.123434	1	FALSE
1	95560246	95563367	TMEM56	ENSG00000152078	-19526	95582894	95663163	+	768	2	FALSE	-0.0536405	4.49095	0.779807	1	FALSE	-0.903393	4.491	5.42094e-05	0.577059	FALSE	0.641855	4.49097	0.00023093	1	FALSE	0.614663	4.49098	0.00176569	1	FALSE	-0.567028	4.49098	0.150854	1	FALSE	-0.813202	4.491	0.000743012	1	FALSE	0.147369	4.49085	0.721163	1	FALSE
1	95581992	95582393	TMEM56	ENSG00000152078	-500	95582894	95663163	+	768	38	FALSE	-0.154838	4.47723	0.705826	1	FALSE	-0.124188	4.47721	0.416544	1	FALSE	-0.617035	4.47722	0.000372634	1	FALSE	0.332684	4.47721	0.0702117	1	FALSE	-1.04871	4.47722	0.0193821	1	FALSE	0.638144	4.47721	0.000383501	1	FALSE	0.350801	4.47727	0.218584	1	FALSE
1	95743519	95744089	RP11-57H12.5	ENSG00000228852	-13908	95714256	95729610	-	768	86	TRUE	-0.80723	5.21988	0.0156694	1	FALSE	0.692108	5.21986	0.00146307	1	FALSE	1.10994	5.21987	6.45026e-08	0.000801768	TRUE	-1.8533	5.21986	4.74106e-10	5.99555e-06	TRUE	-0.660212	5.21987	0.191591	1	FALSE	-0.795632	5.21985	0.00451331	1	FALSE	-0.452411	5.21993	0.241583	1	FALSE
1	97186617	97186720	PTBP2	ENSG00000117569	-500	97187221	97279267	+	768	40	TRUE	0.0844359	4.29685	0.528167	1	FALSE	-0.425553	4.29688	0.0357637	1	FALSE	-0.144918	4.29686	0.506989	1	FALSE	0.212582	4.29687	0.305804	1	FALSE	0.46666	4.29687	0.141043	1	FALSE	0.181888	4.29689	0.511117	1	FALSE	-0.0986705	4.29678	0.811494	1	FALSE
1	98387106	98387702	DPYD	ENSG00000188641	-500	98185314	98386605	-	768	5	FALSE	0.669482	4.15839	0.00431025	1	FALSE	0.0255392	4.1584	0.648076	1	FALSE	-0.252348	4.1584	0.356584	1	FALSE	-0.236806	4.1584	0.271557	1	FALSE	-0.433529	4.1584	0.202175	1	FALSE	0.162506	4.1584	1	1	FALSE	-0.174341	4.15836	0.578279	1	FALSE
1	98441474	98442347	RP11-490G2.2	ENSG00000259946	-7103	98432561	98434370	-	768	1	FALSE	-0.113708	4.1763	0.793485	1	FALSE	0.254148	4.17631	0.397453	1	FALSE	-0.496628	4.1763	0.0298182	1	FALSE	0.683785	4.17631	0.00859096	1	FALSE	-0.423876	4.1763	0.542486	1	FALSE	-0.308818	4.17631	0.447623	1	FALSE	-0.167765	4.17627	0.963031	1	FALSE
1	98870987	98871712	AL160056.1	ENSG00000221777	31931	98838941	98839055	+	768	6	FALSE	0.0945305	4.19907	0.92646	1	FALSE	-0.42884	4.1991	0.102785	1	FALSE	-0.116124	4.19908	0.673824	1	FALSE	0.117206	4.19909	0.828701	1	FALSE	-0.847839	4.19909	0.0411383	1	FALSE	0.331607	4.1991	0.162315	1	FALSE	0.521683	4.19901	0.0810258	1	FALSE
1	99336603	99337763	LPPR5	ENSG00000117598	18042	99355806	99470588	-	768	0	FALSE	0.245172	4.12803	0.326144	1	FALSE	-0.0946359	4.12803	0.914655	1	FALSE	-0.282558	4.12803	0.0678864	1	FALSE	0.192355	4.12803	0.713785	1	FALSE	-0.235057	4.12803	1	1	FALSE	0.168375	4.12803	0.553592	1	FALSE	-0.0462855	4.12802	1	1	FALSE
1	99645917	99646596	RP5-896L10.1	ENSG00000232825	31508	99469832	99614408	+	768	0	FALSE	0.133775	4.11809	0.412457	1	FALSE	-0.0435588	4.11809	1	1	FALSE	0.0487816	4.11809	0.809564	1	FALSE	-0.0414594	4.11809	1	1	FALSE	-0.0366135	4.11809	1	1	FALSE	-0.040746	4.11809	1	1	FALSE	-0.0377354	4.11809	1	1	FALSE
1	100232688	100232795	FRRS1	ENSG00000156869	-500	100213151	100232187	-	768	11	FALSE	-0.0153126	4.12924	1	1	FALSE	-0.0429594	4.12925	1	1	FALSE	-0.0830715	4.12924	1	1	FALSE	0.161948	4.12924	0.364395	1	FALSE	-0.0153961	4.12924	1	1	FALSE	0.137452	4.12925	0.734173	1	FALSE	-0.266947	4.12923	0.603554	1	FALSE
1	100250942	100251087	RNU4-75P	ENSG00000201491	-500	100250296	100250441	-	768	6	FALSE	-0.0336472	4.11696	1	1	FALSE	-0.0368897	4.11696	1	1	FALSE	0.0442767	4.11696	0.811623	1	FALSE	0.0665399	4.11696	0.598053	1	FALSE	-0.0315706	4.11696	1	1	FALSE	-0.0346907	4.11696	1	1	FALSE	-0.0322306	4.11696	1	1	FALSE
1	100252057	100252985	RNU4-75P	ENSG00000201491	-1615	100250296	100250441	-	768	0	FALSE	-0.145471	4.15255	0.84444	1	FALSE	-0.361931	4.15256	0.0746555	1	FALSE	-0.116113	4.15256	0.524772	1	FALSE	0.353722	4.15256	0.0732919	1	FALSE	-0.294819	4.15256	0.890846	1	FALSE	0.444041	4.15256	0.0509617	1	FALSE	-0.189848	4.15255	0.833345	1	FALSE
1	100273993	100274904	Y_RNA	ENSG00000202254	16683	100257218	100257309	+	768	0	FALSE	0.122874	4.12898	0.923969	1	FALSE	-0.0701778	4.12898	1	1	FALSE	0.116921	4.12898	0.315351	1	FALSE	0.127173	4.12898	0.713907	1	FALSE	-0.21922	4.12898	1	1	FALSE	-0.239896	4.12898	0.230885	1	FALSE	-0.0402072	4.12898	1	1	FALSE
1	100315028	100315139	AGL	ENSG00000162688	-500	100315640	100389576	+	768	63	TRUE	0.879045	4.26934	0.000270331	1	FALSE	-0.819595	4.26943	0.00118621	1	FALSE	-0.100032	4.26937	0.914108	1	FALSE	0.320477	4.2694	0.1644	1	FALSE	0.705401	4.26939	0.0474145	1	FALSE	-0.544566	4.26944	0.0386976	1	FALSE	-0.450557	4.26913	0.229081	1	FALSE
1	100995954	100997431	GPR88	ENSG00000181656	-6261	101003693	101007574	+	768	7	FALSE	-0.92733	4.59477	0.000192902	1	FALSE	-0.163823	4.5948	0.416793	1	FALSE	-0.910807	4.59478	1.53012e-06	0.0183676	FALSE	0.346378	4.59479	0.0757348	1	FALSE	1.80754	4.59479	1.14187e-13	1.49654e-09	FALSE	0.120873	4.5948	0.57923	1	FALSE	0.0999623	4.5947	0.706891	1	FALSE
1	101000381	101002752	GPR88	ENSG00000181656	-940	101003693	101007574	+	768	103	TRUE	-0.700401	6.23529	0.00881871	1	FALSE	-0.955417	6.23532	2.47404e-06	0.0280928	FALSE	-0.017027	6.2353	0.940706	1	FALSE	1.66816	6.23531	2.01769e-21	2.68635e-17	TRUE	-1.17553	6.23531	0.00340726	1	FALSE	-1.18628	6.23533	4.24596e-07	0.00487266	TRUE	0.333335	6.2352	0.205412	1	FALSE
1	101080158	101080438	RP11-84O12.4	ENSG00000230402	12166	101092605	101106169	-	768	6	FALSE	0.18222	4.1395	0.486501	1	FALSE	-0.176197	4.1395	0.45492	1	FALSE	-0.288895	4.1395	0.137337	1	FALSE	0.063935	4.1395	1	1	FALSE	-0.364024	4.1395	0.624642	1	FALSE	-0.178895	4.1395	0.599258	1	FALSE	0.918055	4.13951	0.000174726	1	FALSE
1	101280192	101281237	EXTL2	ENSG00000162694	56705	101337943	101360368	-	768	5	FALSE	0.614537	4.31113	0.00567337	1	FALSE	0.228921	4.31114	0.290485	1	FALSE	-0.388909	4.31113	0.057315	1	FALSE	-0.0123433	4.31114	1	1	FALSE	-0.545938	4.31114	0.143922	1	FALSE	-0.44819	4.31115	0.0493323	1	FALSE	0.354957	4.31108	0.208026	1	FALSE
1	101577449	101578485	SCARNA16	ENSG00000252765	-20223	101598709	101598895	+	768	0	FALSE	-0.0135414	4.14678	1	1	FALSE	-0.209665	4.14678	0.364733	1	FALSE	0.057484	4.14678	0.534858	1	FALSE	-0.248106	4.14678	0.199853	1	FALSE	-0.472452	4.14678	0.397805	1	FALSE	0.471116	4.14678	0.029192	1	FALSE	0.178608	4.14677	0.946	1	FALSE
1	101774593	101775799	RP11-157N3.1	ENSG00000231671	-13093	101788893	101815732	+	768	1	FALSE	0.0700203	4.20465	1	1	FALSE	-0.42275	4.20468	0.113901	1	FALSE	-0.445744	4.20466	0.0548019	1	FALSE	0.756229	4.20467	0.000600423	1	FALSE	0.129956	4.20467	0.962511	1	FALSE	0.149154	4.20468	0.636083	1	FALSE	-0.401277	4.2046	0.306642	1	FALSE
1	101777434	101778484	RP11-157N3.1	ENSG00000231671	-10408	101788893	101815732	+	768	0	FALSE	0.119577	4.12373	1	1	FALSE	-0.159165	4.12373	0.296667	1	FALSE	-0.00589913	4.12373	1	1	FALSE	0.0428611	4.12373	0.76616	1	FALSE	-0.137027	4.12373	1	1	FALSE	-0.0338956	4.12373	1	1	FALSE	0.229489	4.12373	0.270652	1	FALSE
1	101872640	101873724	RP11-157N3.1	ENSG00000231671	16780	101815605	101855859	+	768	0	FALSE	-0.127919	4.12866	1	1	FALSE	-0.258148	4.12867	0.0741002	1	FALSE	-0.0829082	4.12866	0.632761	1	FALSE	-0.0630322	4.12867	1	1	FALSE	1.04564	4.12866	5.11893e-06	0.0623843	FALSE	0.0569393	4.12867	0.815882	1	FALSE	-0.109765	4.12864	0.656478	1	FALSE
1	102188626	102188797	RP11-411H5.1	ENSG00000226715	-500	102189298	102195170	+	768	7	FALSE	-0.0235252	4.12199	1	1	FALSE	-0.0841459	4.12199	1	1	FALSE	-0.182796	4.12199	0.323463	1	FALSE	0.11796	4.12199	0.638435	1	FALSE	0.501658	4.12199	0.0913448	1	FALSE	0.0599967	4.12199	0.587247	1	FALSE	-0.154217	4.12197	1	1	FALSE
1	102207133	102207938	RP11-411H5.1	ENSG00000226715	11962	102189298	102195170	+	768	1	FALSE	-0.370102	4.24202	0.259593	1	FALSE	0.209617	4.24205	0.346463	1	FALSE	0.136883	4.24203	0.474698	1	FALSE	0.232025	4.24204	0.357194	1	FALSE	0.878905	4.24204	0.00951408	1	FALSE	-0.847496	4.24205	0.00314009	1	FALSE	-0.626566	4.24197	0.0658031	1	FALSE
1	102497604	102498903	OLFM3	ENSG00000118733	-35017	102268130	102462586	-	768	0	FALSE	0.0168135	4.22843	0.951122	1	FALSE	-0.156975	4.22845	0.566542	1	FALSE	0.308775	4.22844	0.113787	1	FALSE	-0.0754004	4.22844	0.811363	1	FALSE	0.0614808	4.22844	1	1	FALSE	-0.136569	4.22845	0.638146	1	FALSE	-0.171821	4.22839	0.842441	1	FALSE
1	102899814	102900271	RP11-202K23.1	ENSG00000233359	-44627	102665295	102855186	-	768	0	FALSE	-0.0385664	4.12676	1	1	FALSE	0.0718033	4.12676	0.845289	1	FALSE	0.255923	4.12676	0.0489209	1	FALSE	-0.193232	4.12676	0.29093	1	FALSE	-0.171346	4.12676	1	1	FALSE	-0.0709077	4.12676	0.962204	1	FALSE	-0.175578	4.12677	0.790464	1	FALSE
1	104480217	104480936	RP11-97C18.1	ENSG00000225191	9788	104469189	104470428	+	768	1	FALSE	0.632908	4.13719	0.00172903	1	FALSE	-0.310901	4.1372	0.0873116	1	FALSE	0.148511	4.1372	0.466925	1	FALSE	0.0346118	4.1372	0.972637	1	FALSE	-0.345942	4.1372	0.642402	1	FALSE	-0.181269	4.1372	0.612651	1	FALSE	-0.353946	4.13718	0.335585	1	FALSE
1	104599203	104600883	RP11-364B6.2	ENSG00000243500	-14748	104615632	104616159	+	768	73	TRUE	-1.07575	5.41529	3.72184e-05	0.425258	FALSE	0.0654299	5.41533	0.687932	1	FALSE	0.970555	5.41531	1.82881e-09	2.32753e-05	TRUE	-0.482418	5.41532	0.0190012	1	FALSE	-1.78756	5.41531	4.1608e-05	0.493138	FALSE	-0.197766	5.41534	0.340094	1	FALSE	0.0343212	5.41519	0.884117	1	FALSE
1	105009655	105011457	FTLP17	ENSG00000228347	-313202	104695928	104696452	-	768	0	FALSE	-0.191353	4.18217	0.612802	1	FALSE	-0.492089	4.18218	0.0743915	1	FALSE	0.936659	4.18217	6.86171e-06	0.0805839	FALSE	0.0606659	4.18217	0.790138	1	FALSE	-0.320518	4.18217	0.764041	1	FALSE	-0.548598	4.18218	0.0320057	1	FALSE	-0.609716	4.18213	0.0953435	1	FALSE
1	106018493	106019479	RP11-414B7.1	ENSG00000225036	41049	105976616	105977443	+	768	0	FALSE	-0.106494	4.14185	0.954749	1	FALSE	0.143759	4.14184	0.543557	1	FALSE	-0.195368	4.14185	0.292267	1	FALSE	0.0626026	4.14185	0.771379	1	FALSE	0.135976	4.14185	0.72709	1	FALSE	0.214262	4.14184	0.356341	1	FALSE	-0.368559	4.14186	0.242978	1	FALSE
1	107450224	107450865	RP11-233E12.1	ENSG00000237460	69434	107360861	107380789	+	768	0	FALSE	-0.0949332	4.12057	1	1	FALSE	0.161749	4.12057	0.13638	1	FALSE	-0.10891	4.12057	0.545645	1	FALSE	0.168305	4.12057	0.378081	1	FALSE	-0.0890962	4.12057	1	1	FALSE	-0.0978555	4.12057	0.870116	1	FALSE	-0.090929	4.12057	1	1	FALSE
1	107538524	107539608	PRMT6	ENSG00000198890	-59658	107599267	107601905	+	768	0	FALSE	-0.0864698	4.14304	0.850606	1	FALSE	-0.211923	4.14304	0.300514	1	FALSE	0.215763	4.14304	0.248973	1	FALSE	-0.158219	4.14304	0.686575	1	FALSE	0.289504	4.14304	0.317573	1	FALSE	0.15293	4.14304	0.459003	1	FALSE	-0.20002	4.14305	0.688513	1	FALSE
1	107559155	107559594	PRMT6	ENSG00000198890	-39672	107599267	107601905	+	768	0	FALSE	-0.033656	4.11709	1	1	FALSE	-0.0368992	4.11709	1	1	FALSE	-0.038517	4.11709	1	1	FALSE	0.0664157	4.11709	0.598053	1	FALSE	-0.0315788	4.11709	1	1	FALSE	0.0828373	4.11709	0.567362	1	FALSE	-0.0322392	4.11708	1	1	FALSE
1	108041170	108043146	RP11-270C12.3	ENSG00000224550	-4678	108047825	108048070	+	768	2	FALSE	-0.142161	4.49536	0.57798	1	FALSE	0.0353754	4.4954	0.711516	1	FALSE	-0.16356	4.49537	0.498515	1	FALSE	0.442843	4.49539	0.0170508	1	FALSE	0.0201496	4.49538	1	1	FALSE	-0.288151	4.49541	0.137	1	FALSE	0.00479352	4.49525	0.907308	1	FALSE
1	108091363	108092420	VAV3	ENSG00000134215	21361	108113782	108507766	-	768	3	FALSE	-0.151724	4.3793	0.518072	1	FALSE	0.608647	4.3793	0.00153245	1	FALSE	-1.11138	4.3793	3.71056e-08	0.00046304	FALSE	-0.258695	4.3793	0.482926	1	FALSE	-0.381828	4.3793	0.268528	1	FALSE	0.799204	4.3793	5.39074e-05	0.574222	FALSE	-0.110786	4.37931	0.67682	1	FALSE
1	108549531	108551571	AL390036.1	ENSG00000264753	9703	108561275	108561393	-	768	10	FALSE	2.03462	4.6713	5.33942e-24	7.14307e-20	FALSE	-0.381588	4.67137	0.067452	1	FALSE	-0.516335	4.67133	0.0142347	1	FALSE	-0.354757	4.67135	0.140305	1	FALSE	-1.7309	4.67134	0.00150915	1	FALSE	-0.642187	4.67137	0.0191344	1	FALSE	-0.349835	4.67115	0.305578	1	FALSE
1	108660601	108661160	SLC25A24	ENSG00000085491	15497	108676658	108742980	-	768	146	TRUE	0.0741423	5.17855	0.619213	1	FALSE	0.305059	5.17856	0.023415	1	FALSE	-0.171116	5.17856	0.187737	1	FALSE	-0.480353	5.17856	0.0021504	1	FALSE	0.0256036	5.17856	0.807633	1	FALSE	0.29112	5.17856	0.0540315	1	FALSE	-0.188567	5.17853	0.335125	1	FALSE
1	108667109	108668557	SLC25A24	ENSG00000085491	8100	108676658	108742980	-	768	501	TRUE	-0.394197	7.17378	0.0012149	1	FALSE	0.115684	7.17378	0.208392	1	FALSE	-0.117091	7.17378	0.18418	1	FALSE	-0.203497	7.17378	0.0497226	1	FALSE	0.0734642	7.17378	0.579819	1	FALSE	0.400102	7.17377	4.76637e-05	0.508953	FALSE	0.0215531	7.1738	0.888583	1	FALSE
1	109101790	109102210	FAM102B	ENSG00000162636	-500	109102711	109181949	+	768	161	TRUE	-0.341371	5.11352	0.204247	1	FALSE	0.128377	5.11355	0.487506	1	FALSE	-0.188472	5.11353	0.358199	1	FALSE	-0.0877162	5.11354	0.713922	1	FALSE	-0.0123351	5.11354	1	1	FALSE	-1.04097	5.11355	9.18e-06	0.101081	FALSE	1.39513	5.11344	2.84705e-09	3.80651e-05	TRUE
1	109204649	109204785	HENMT1	ENSG00000162639	-500	109190917	109204148	-	768	676	TRUE	-0.146935	6.03717	0.230335	1	FALSE	-0.410398	6.03724	3.55452e-05	0.382822	FALSE	-0.0282893	6.0372	0.905397	1	FALSE	0.345189	6.03722	0.000697239	1	FALSE	0.283739	6.03721	0.0788015	1	FALSE	0.111069	6.03725	0.308568	1	FALSE	-0.00897732	6.037	0.921096	1	FALSE
1	109233874	109234444	PRPF38B	ENSG00000134186	-500	109234945	109244425	+	768	760	TRUE	0.0446446	8.53295	0.640544	1	FALSE	-0.306517	8.53298	4.9615e-05	0.52964	FALSE	-0.112719	8.53296	0.133472	1	FALSE	0.469889	8.53297	9.16369e-10	1.15417e-05	FALSE	-0.0371974	8.53297	0.798512	1	FALSE	-0.112071	8.53298	0.182148	1	FALSE	0.0946219	8.5329	0.390915	1	FALSE
1	109506612	109507124	CLCC1	ENSG00000121940	-500	109472130	109506111	-	768	14	FALSE	0.139568	4.50508	0.356832	1	FALSE	-0.266427	4.50512	0.107456	1	FALSE	-0.0613527	4.5051	0.753328	1	FALSE	0.397303	4.50511	0.00825319	1	FALSE	0.103826	4.50511	0.779164	1	FALSE	-0.441915	4.50513	0.0221616	1	FALSE	0.233756	4.50498	0.461625	1	FALSE
1	109619125	109619465	TAF13	ENSG00000197780	-500	109606762	109618624	-	768	47	TRUE	0.118933	4.50827	0.728211	1	FALSE	-0.463652	4.5083	0.00691688	1	FALSE	-0.0884369	4.50828	0.669323	1	FALSE	-0.139061	4.50829	0.292279	1	FALSE	-0.202286	4.50829	0.467949	1	FALSE	0.608685	4.50831	0.000101087	1	FALSE	0.147781	4.50819	0.483698	1	FALSE
1	109756020	109756039	SARS	ENSG00000031698	-500	109756540	109780742	+	768	95	TRUE	0.364883	4.30174	0.0565425	1	FALSE	-0.322787	4.30178	0.107931	1	FALSE	-0.571941	4.30175	0.00623107	1	FALSE	0.566404	4.30176	0.00066295	1	FALSE	-0.293306	4.30176	0.261502	1	FALSE	0.224452	4.30178	0.315616	1	FALSE	-0.129547	4.30164	0.504147	1	FALSE
1	109791802	109792140	CELSR2	ENSG00000143126	-500	109792641	109818372	+	768	3	FALSE	-0.0290949	4.13409	1	1	FALSE	0.0212552	4.13409	1	1	FALSE	-0.0994339	4.13409	0.762942	1	FALSE	-0.210131	4.13409	0.367809	1	FALSE	-0.275551	4.13409	0.78292	1	FALSE	0.391719	4.13409	0.0269308	1	FALSE	0.0850578	4.13409	0.882233	1	FALSE
1	109826309	109827111	PSRC1	ENSG00000134222	-500	109822187	109825808	-	768	21	FALSE	-0.716651	4.70364	0.0269695	1	FALSE	-1.26933	4.70383	1.3854e-06	0.0158947	FALSE	-1.23484	4.70371	1.23272e-06	0.0148419	FALSE	1.11761	4.70377	1.57536e-06	0.0186286	FALSE	-0.756081	4.70375	0.148876	1	FALSE	1.43546	4.70386	5.03669e-10	6.13972e-06	FALSE	-0.689665	4.70318	0.102514	1	FALSE
1	109969563	109970027	PSMA5	ENSG00000143106	-500	109944419	109969062	-	768	79	TRUE	0.18321	4.70386	0.456984	1	FALSE	-0.875977	4.704	9.60519e-07	0.0110786	FALSE	-0.0101283	4.70391	0.829319	1	FALSE	0.464425	4.70395	0.00390825	1	FALSE	0.498608	4.70394	0.0755555	1	FALSE	-0.0245584	4.70402	1	1	FALSE	-0.0518286	4.70352	0.953138	1	FALSE
1	110074670	110075688	GPR61	ENSG00000156097	-6805	110082494	110088466	+	768	0	FALSE	0.240138	4.13896	0.228807	1	FALSE	-0.154648	4.13897	0.437797	1	FALSE	-0.208728	4.13897	0.653662	1	FALSE	0.051417	4.13897	0.701289	1	FALSE	0.813489	4.13897	0.0127901	1	FALSE	-0.141219	4.13897	0.527688	1	FALSE	-0.241793	4.13894	0.806428	1	FALSE
1	110185869	110186632	RP5-1160K1.1	ENSG00000235045	-7359	110193992	110194721	+	768	0	FALSE	0.0116676	4.30359	0.893722	1	FALSE	-0.400875	4.3036	0.0329685	1	FALSE	0.190024	4.30359	0.294058	1	FALSE	-0.41102	4.3036	0.0928598	1	FALSE	-0.3911	4.3036	0.311373	1	FALSE	0.839386	4.3036	1.2526e-05	0.137285	FALSE	-0.53819	4.30356	0.104896	1	FALSE
1	110357800	110361192	NDUFA5P10	ENSG00000224927	-4179	110353264	110353620	-	768	1	FALSE	0.713941	4.34694	0.00219172	1	FALSE	-0.310225	4.347	0.167479	1	FALSE	-0.211334	4.34696	0.389058	1	FALSE	0.420638	4.34698	0.0675336	1	FALSE	-0.604165	4.34698	0.231467	1	FALSE	-0.299469	4.34701	0.292121	1	FALSE	-0.201169	4.34681	0.637422	1	FALSE
1	110448347	110449549	CSF1	ENSG00000184371	-3314	110452864	110464502	+	768	1	FALSE	-0.217754	4.18632	0.467468	1	FALSE	-0.1711	4.18631	0.544415	1	FALSE	-0.468921	4.18631	0.0362924	1	FALSE	-0.320031	4.18631	0.128978	1	FALSE	0.0959133	4.18631	0.935867	1	FALSE	0.499212	4.18631	0.0285734	1	FALSE	0.977824	4.18633	0.000387547	1	FALSE
1	110679689	110680317	SLC6A17	ENSG00000197106	-12790	110693108	110744824	+	768	42	TRUE	-0.92554	4.69123	0.0416823	1	FALSE	-1.57858	4.69119	1.23031e-06	0.0141375	FALSE	1.25722	4.69122	2.31573e-06	0.0276522	FALSE	-0.544222	4.6912	0.119033	1	FALSE	-2.6426	4.69121	0.000154362	1	FALSE	0.321313	4.69118	0.313811	1	FALSE	0.77777	4.69134	0.0539455	1	FALSE
1	110753110	110753464	KCNC4	ENSG00000116396	-500	110753965	110766705	+	768	401	TRUE	-0.943833	5.76627	1.4081e-08	0.000176562	TRUE	-0.214909	5.76627	0.0950986	1	FALSE	0.280831	5.76627	0.0107703	1	FALSE	0.524855	5.76627	1.30238e-05	0.148797	FALSE	-0.117429	5.76627	0.684763	1	FALSE	0.055283	5.76628	0.74228	1	FALSE	-0.458941	5.76625	0.0159923	1	FALSE
1	111067089	111067825	KCNA10	ENSG00000143105	-5291	111059839	111061797	-	768	11	FALSE	-0.828303	4.27376	0.0130348	1	FALSE	1.12927	4.27376	2.57312e-07	0.00302496	FALSE	0.6341	4.27376	0.00470084	1	FALSE	-1.38216	4.27376	1.00768e-06	0.0119904	FALSE	-1.10668	4.27376	0.0222723	1	FALSE	-1.02247	4.27376	0.000578208	1	FALSE	-0.103207	4.27375	0.92503	1	FALSE
1	111097905	111098627	KCNA10	ENSG00000143105	-36107	111059839	111061797	-	768	0	FALSE	0.144338	4.13701	0.815092	1	FALSE	0.25429	4.13701	0.117571	1	FALSE	-0.0904387	4.13701	0.909224	1	FALSE	-0.173811	4.13701	0.624514	1	FALSE	0.132025	4.13701	1	1	FALSE	-0.242258	4.13701	0.289868	1	FALSE	0.0315939	4.13701	1	1	FALSE
1	111174597	111183690	KCNA2	ENSG00000177301	-500	111136202	111174096	-	768	379	TRUE	1.30617	9.14515	1.14695e-21	1.53141e-17	TRUE	-0.33584	9.14519	0.00810578	1	FALSE	-0.473832	9.14516	0.000119439	1	FALSE	-0.194452	9.14518	0.16374	1	FALSE	1.06404	9.14517	9.6677e-08	0.00121678	TRUE	-0.793638	9.14519	6.15529e-08	0.000722693	TRUE	-0.166906	9.14507	0.386311	1	FALSE
1	111187904	111190563	AL365361.1	ENSG00000221538	5000	111195564	111195653	-	768	57	TRUE	-0.810652	6.20094	0.000320575	1	FALSE	0.169744	6.20097	0.281663	1	FALSE	-0.916799	6.20095	1.1148e-08	0.000140242	TRUE	0.322903	6.20096	0.055316	1	FALSE	-0.395649	6.20096	0.212918	1	FALSE	0.654772	6.20097	8.86943e-05	0.932266	FALSE	0.466829	6.20088	0.0316183	1	FALSE
1	111208804	111209309	KCNA3	ENSG00000177272	5000	111214310	111217655	-	768	646	TRUE	-0.185481	8.02158	0.281247	1	FALSE	0.256713	8.02159	0.0328303	1	FALSE	0.195107	8.02158	0.0944835	1	FALSE	0.638926	8.02159	6.15059e-07	0.00735119	FALSE	0.194327	8.02159	0.360633	1	FALSE	-1.81229	8.02159	5.30617e-33	7.04554e-29	TRUE	-0.355436	8.02156	0.0617404	1	FALSE
1	111218156	111218623	KCNA3	ENSG00000177272	-500	111214310	111217655	-	768	757	TRUE	0.175021	9.58855	0.203971	1	FALSE	0.588999	9.58856	1.26911e-08	0.000154197	FALSE	0.463093	9.58855	5.95415e-06	0.0700744	FALSE	-0.604414	9.58856	1.69953e-06	0.020068	FALSE	0.402981	9.58855	0.0351441	1	FALSE	-1.86598	9.58856	1.48076e-46	1.98082e-42	TRUE	-0.195935	9.58855	0.246403	1	FALSE
1	111228573	111229172	KCNA3	ENSG00000177272	-10917	111214310	111217655	-	768	648	TRUE	-0.0889507	7.99564	0.562476	1	FALSE	0.531309	7.99565	3.79032e-07	0.00443619	FALSE	0.320475	7.99564	0.00200808	1	FALSE	-0.283812	7.99565	0.0239934	1	FALSE	-0.0285573	7.99565	0.942143	1	FALSE	-1.07031	7.99565	4.50062e-16	5.74415e-12	TRUE	-0.0742378	7.99561	0.6476	1	FALSE
1	111269313	111270284	Y_RNA	ENSG00000199710	36745	111307030	111307128	-	768	13	FALSE	-0.24754	4.81195	0.369668	1	FALSE	0.567892	4.81196	0.00200369	1	FALSE	0.328387	4.81196	0.0661225	1	FALSE	-1.2489	4.81196	1.48408e-07	0.00180108	FALSE	-0.500992	4.81196	0.214597	1	FALSE	0.15325	4.81196	0.543783	1	FALSE	-0.225275	4.81193	0.506	1	FALSE
1	111313061	111315471	Y_RNA	ENSG00000199710	-5932	111307030	111307128	-	768	24	FALSE	0.00233987	5.32295	1	1	FALSE	-0.822642	5.32303	0.000337515	1	FALSE	-0.7507	5.32298	0.000582393	1	FALSE	2.13866	5.323	2.62773e-32	3.52616e-28	FALSE	-0.306728	5.32299	0.511403	1	FALSE	-2.21003	5.32304	3.2463e-15	4.12215e-11	FALSE	-0.377529	5.32276	0.276306	1	FALSE
1	111323145	111324194	Y_RNA	ENSG00000199710	-16016	111307030	111307128	-	768	124	TRUE	-0.343629	5.72676	0.203359	1	FALSE	-0.447933	5.72681	0.024869	1	FALSE	-0.612709	5.72678	0.00187787	1	FALSE	2.09318	5.72679	2.19081e-37	2.94226e-33	TRUE	0.216515	5.72679	0.472475	1	FALSE	-2.63255	5.72682	7.34934e-25	9.64894e-21	TRUE	-1.02443	5.72665	0.000958471	1	FALSE
1	111327751	111331719	Y_RNA	ENSG00000199710	-20622	111307030	111307128	-	768	50	TRUE	1.54333	5.91244	1.2733e-13	1.67146e-09	TRUE	-1.31369	5.91267	2.55833e-10	3.20558e-06	TRUE	-0.496275	5.91252	0.0116648	1	FALSE	0.951515	5.9126	6.32861e-07	0.00756015	TRUE	0.641508	5.91257	0.0438585	1	FALSE	-1.92653	5.9127	3.81619e-15	4.84351e-11	TRUE	-0.382932	5.91187	0.200129	1	FALSE
1	111371946	111372879	NRBF2P3	ENSG00000237415	17819	111390699	111391563	-	768	5	FALSE	-0.493392	4.47466	0.029832	1	FALSE	0.402579	4.47469	0.0123539	1	FALSE	0.36529	4.47467	0.00767459	1	FALSE	-0.377511	4.47468	0.0271385	1	FALSE	-1.17842	4.47468	0.00154266	1	FALSE	-0.194588	4.47469	0.382849	1	FALSE	0.241841	4.47458	0.513613	1	FALSE
1	111379089	111379948	NRBF2P3	ENSG00000237415	10750	111390699	111391563	-	768	1	FALSE	-0.147948	4.25259	0.637044	1	FALSE	0.339539	4.25261	0.0853423	1	FALSE	0.238197	4.2526	0.168481	1	FALSE	-0.0760187	4.2526	0.943528	1	FALSE	-0.841686	4.2526	0.0536126	1	FALSE	-0.277101	4.25261	0.250977	1	FALSE	-0.133059	4.25256	0.575763	1	FALSE
1	111412990	111415274	CD53	ENSG00000143119	-500	111415775	111442198	+	768	763	TRUE	0.0335259	11.7192	0.756295	1	FALSE	0.205903	11.7192	0.0184406	1	FALSE	0.464965	11.7192	2.03667e-08	0.000255153	FALSE	-0.174915	11.7192	0.0832438	1	FALSE	-1.51797	11.7192	4.95578e-16	6.53519e-12	TRUE	-0.634859	11.7192	1.32674e-09	1.60868e-05	FALSE	0.152987	11.7192	0.233336	1	FALSE
1	111459072	111460038	CD53	ENSG00000143119	16521	111415776	111442550	+	768	711	TRUE	0.390287	8.2498	0.000982035	1	FALSE	0.380884	8.2498	3.30996e-05	0.357343	FALSE	-0.283226	8.2498	0.00263703	1	FALSE	-0.620065	8.2498	1.15441e-08	0.000143228	FALSE	-0.847267	8.2498	1.45056e-05	0.174648	FALSE	0.241294	8.24981	0.0216621	1	FALSE	0.105676	8.24978	0.457553	1	FALSE
1	111817421	111818710	CHIAP2	ENSG00000203878	-3970	111822681	111828730	+	768	0	FALSE	0.578447	4.14422	0.0560149	1	FALSE	-0.247383	4.14422	0.217372	1	FALSE	-0.29424	4.14422	0.149333	1	FALSE	-0.208573	4.14422	0.56556	1	FALSE	-0.437493	4.14422	0.441471	1	FALSE	0.513444	4.14422	0.00525817	1	FALSE	-0.0820809	4.14421	1	1	FALSE
1	111888373	111888409	PIFO	ENSG00000173947	-500	111888910	111895635	+	768	31	FALSE	1.13483	4.14703	3.38311e-07	0.00413449	FALSE	-0.621937	4.14705	0.000877389	1	FALSE	-0.157815	4.14704	0.690925	1	FALSE	-0.0472226	4.14704	1	1	FALSE	-0.0961495	4.14704	0.99835	1	FALSE	-0.371954	4.14705	0.185002	1	FALSE	0.185766	4.14699	1	1	FALSE
1	112582952	112584402	RP11-88H9.2	ENSG00000231437	41487	112533158	112541464	+	768	1	FALSE	0.849938	4.19462	0.000919763	1	FALSE	0.357258	4.19464	0.11552	1	FALSE	-0.80886	4.19463	0.000310312	1	FALSE	0.189391	4.19463	0.337392	1	FALSE	-0.113011	4.19463	0.871762	1	FALSE	-0.585404	4.19464	0.0367688	1	FALSE	-0.120133	4.19459	1	1	FALSE
1	113336527	113337582	RP11-426L16.8	ENSG00000215866	25209	113362792	113392437	-	768	0	FALSE	0.0640401	4.12774	0.765096	1	FALSE	0.0501933	4.12774	0.966035	1	FALSE	-0.138381	4.12774	0.410974	1	FALSE	-0.00473301	4.12774	1	1	FALSE	-0.182932	4.12774	1	1	FALSE	0.241055	4.12774	0.155189	1	FALSE	-0.187396	4.12775	0.72783	1	FALSE
1	113683257	113685272	LRIG2	ENSG00000198799	8374	113615831	113674882	+	768	15	FALSE	1.13103	5.22089	3.69059e-09	4.67488e-05	FALSE	-0.313031	5.22092	0.0700626	1	FALSE	-0.096783	5.2209	0.605224	1	FALSE	-0.0159296	5.22091	0.972977	1	FALSE	-0.464609	5.22091	0.238175	1	FALSE	-0.867626	5.22093	4.20661e-05	0.450443	FALSE	0.328359	5.22081	0.181264	1	FALSE
1	113727952	113728755	RP11-389O22.5	ENSG00000236887	-12691	113741447	113741880	+	768	28	FALSE	0.877944	4.60668	8.37113e-06	0.0984445	FALSE	-0.702992	4.60675	0.000241899	1	FALSE	-0.479216	4.60671	0.0124759	1	FALSE	0.567504	4.60673	0.00163795	1	FALSE	-0.712438	4.60672	0.0815366	1	FALSE	-0.0982431	4.60676	0.601422	1	FALSE	0.137645	4.60649	0.52327	1	FALSE
1	113733344	113735574	RP11-389O22.5	ENSG00000236887	-5872	113741447	113741880	+	768	281	TRUE	1.09015	7.22195	3.31722e-12	4.32067e-08	TRUE	-1.22098	7.22199	1.57472e-17	2.07753e-13	TRUE	-0.24794	7.22196	0.0736524	1	FALSE	0.837358	7.22198	1.38267e-09	1.7376e-05	TRUE	-0.168264	7.22197	0.54471	1	FALSE	-0.744563	7.222	4.6946e-06	0.0521993	FALSE	0.0865246	7.22183	0.650883	1	FALSE
1	113751559	113753458	RP11-389O22.5	ENSG00000236887	9678	113741447	113741880	+	768	3	FALSE	0.847981	4.37011	0.00109341	1	FALSE	-0.630354	4.37014	0.00833431	1	FALSE	-0.191262	4.37012	0.515856	1	FALSE	0.584957	4.37013	0.0093366	1	FALSE	-0.871328	4.37013	0.0965732	1	FALSE	-0.191104	4.37014	0.602583	1	FALSE	-0.37832	4.37004	0.339559	1	FALSE
1	113768786	113769391	RP11-389O22.5	ENSG00000236887	26905	113741447	113741880	+	768	16	FALSE	-1.13242	4.33667	0.00216021	1	FALSE	0.363251	4.33667	0.144851	1	FALSE	-1.05674	4.33667	1.73485e-05	0.200409	FALSE	0.338681	4.33667	0.232511	1	FALSE	-0.064407	4.33667	1	1	FALSE	0.90195	4.33667	0.000275035	1	FALSE	-0.296645	4.33667	0.448782	1	FALSE
1	113778835	113780388	RP11-389O22.5	ENSG00000236887	36954	113741447	113741880	+	768	17	FALSE	0.747689	4.59081	0.00174663	1	FALSE	-0.513564	4.59082	0.022485	1	FALSE	-0.323029	4.59081	0.152122	1	FALSE	0.135286	4.59081	0.606991	1	FALSE	-0.231846	4.59081	0.543388	1	FALSE	0.211848	4.59082	0.375132	1	FALSE	0.0248344	4.59079	0.979318	1	FALSE
1	113931872	113932870	MAGI3	ENSG00000081026	-500	113933371	114225056	+	768	138	TRUE	1.28898	5.85562	4.81253e-12	6.26062e-08	TRUE	-0.0848873	5.85563	0.666572	1	FALSE	-0.250877	5.85562	0.13673	1	FALSE	-0.531699	5.85563	0.00500185	1	FALSE	0.223671	5.85563	0.409236	1	FALSE	-0.31626	5.85563	0.106123	1	FALSE	-0.428354	5.85559	0.108016	1	FALSE
1	114888466	114889614	RP4-591B8.3	ENSG00000271419	-6993	114896608	114897800	+	768	0	FALSE	0.921226	4.20121	6.26677e-05	0.708207	FALSE	-0.233239	4.20122	0.429093	1	FALSE	0.147857	4.20121	0.517548	1	FALSE	-0.481329	4.20122	0.0459712	1	FALSE	0.206767	4.20122	0.585348	1	FALSE	-0.174273	4.20123	0.581296	1	FALSE	-0.733876	4.20116	0.051366	1	FALSE
1	114895857	114896107	RP4-591B8.3	ENSG00000271419	-500	114896608	114897800	+	768	3	FALSE	-0.0239943	4.12478	1	1	FALSE	0.169817	4.12478	0.2054	1	FALSE	-0.0235871	4.12478	1	1	FALSE	0.0261292	4.12478	0.888372	1	FALSE	0.0967757	4.12478	0.748736	1	FALSE	-0.165801	4.12478	0.445732	1	FALSE	-0.154529	4.12478	0.925804	1	FALSE
1	114910660	114911672	RP4-591B8.3	ENSG00000271419	12859	114896608	114897800	+	768	15	FALSE	-0.197853	5.02038	0.35154	1	FALSE	0.681464	5.02037	6.32054e-07	0.00734257	FALSE	0.932913	5.02037	3.02903e-13	3.97167e-09	FALSE	-1.29445	5.02037	1.5808e-12	2.04524e-08	FALSE	-0.245966	5.02037	0.526385	1	FALSE	-1.73153	5.02036	1.52714e-18	1.9723e-14	FALSE	-0.232059	5.0204	0.271158	1	FALSE
1	115054282	115055242	TRIM33	ENSG00000197323	-500	114940230	115053781	-	768	704	TRUE	-0.00851425	7.60935	0.884654	1	FALSE	-0.0843852	7.60939	0.29861	1	FALSE	-0.0623904	7.60936	0.456217	1	FALSE	0.324891	7.60938	2.19139e-05	0.247824	FALSE	-0.320756	7.60937	0.019089	1	FALSE	-0.0653949	7.6094	0.410173	1	FALSE	-0.00274973	7.60923	0.895852	1	FALSE
1	115323807	115324179	SIKE1	ENSG00000052723	-500	115321728	115323306	-	768	15	FALSE	0.695906	4.26755	0.00260692	1	FALSE	-0.518488	4.26761	0.0197228	1	FALSE	-0.308929	4.26757	0.266939	1	FALSE	-0.0219032	4.26759	0.895198	1	FALSE	1.0352	4.26759	0.000442598	1	FALSE	-0.530865	4.26762	0.0542985	1	FALSE	0.21716	4.2674	0.402844	1	FALSE
1	115632622	115633084	TSPAN2	ENSG00000134198	-500	115592977	115632121	-	768	24	FALSE	-0.489208	4.44131	0.126589	1	FALSE	-1.31638	4.44138	1.09333e-06	0.0125919	FALSE	-1.28863	4.44134	1.88956e-06	0.0226142	FALSE	1.31975	4.44136	2.32722e-08	0.000287203	FALSE	2.30445	4.44135	3.59003e-12	4.67674e-08	FALSE	-0.848224	4.44138	0.00491681	1	FALSE	-0.087714	4.44117	0.835785	1	FALSE
1	115641034	115641792	RP4-666F24.3	ENSG00000233730	-500	115642293	115645279	+	768	25	FALSE	0.259808	4.52134	0.284356	1	FALSE	-1.87561	4.52139	4.2609e-15	5.55707e-11	FALSE	-0.961653	4.52136	1.08329e-05	0.126105	FALSE	0.892665	4.52137	1.16845e-05	0.133776	FALSE	1.32499	4.52137	2.54983e-05	0.304475	FALSE	0.382806	4.52139	0.102787	1	FALSE	0.11354	4.52122	0.682289	1	FALSE
1	115726845	115728031	RP4-666F24.3	ENSG00000233730	81565	115642293	115645279	+	768	0	FALSE	0.27964	4.13784	0.478668	1	FALSE	-0.191121	4.13785	0.498661	1	FALSE	-0.0967735	4.13784	0.733297	1	FALSE	-0.24343	4.13784	0.505536	1	FALSE	0.578098	4.13784	0.217956	1	FALSE	0.260527	4.13785	0.103715	1	FALSE	-0.396331	4.13782	0.279472	1	FALSE
1	116504645	116505386	SLC22A15	ENSG00000163393	-13732	116519119	116612675	+	768	17	FALSE	0.132092	4.42742	0.641195	1	FALSE	0.0573467	4.42749	0.717307	1	FALSE	0.440247	4.42744	0.0203741	1	FALSE	-0.225673	4.42747	0.360315	1	FALSE	-1.7447	4.42746	0.000403658	1	FALSE	0.0713986	4.42749	0.850849	1	FALSE	-0.592249	4.42726	0.0549346	1	FALSE
1	116518123	116518618	SLC22A15	ENSG00000163393	-500	116519119	116612675	+	768	56	TRUE	0.275341	4.63154	0.239755	1	FALSE	0.29074	4.63157	0.0566077	1	FALSE	-0.417967	4.63155	0.00560966	1	FALSE	-0.28669	4.63156	0.125512	1	FALSE	-1.90916	4.63156	2.01209e-07	0.00251954	TRUE	0.429457	4.63157	0.00795692	1	FALSE	0.285174	4.63146	0.199131	1	FALSE
1	116694735	116695222	RP5-1185H19.2	ENSG00000235933	-11682	116706905	116708862	+	768	0	FALSE	0.535942	4.17078	0.0384077	1	FALSE	0.250558	4.17078	0.23533	1	FALSE	0.0111022	4.17078	0.998159	1	FALSE	-0.5695	4.17078	0.0104512	1	FALSE	-0.080768	4.17078	0.951518	1	FALSE	0.0140911	4.17078	1	1	FALSE	-0.543959	4.17077	0.124413	1	FALSE
1	117045709	117048187	RP5-1086K13.1	ENSG00000224950	-3874	117035645	117041834	-	768	23	FALSE	0.110778	5.56216	0.524649	1	FALSE	-0.430247	5.56217	0.00449844	1	FALSE	0.591711	5.56216	4.9427e-06	0.0583139	FALSE	-0.112419	5.56216	0.505413	1	FALSE	0.711951	5.56216	0.00266214	1	FALSE	-1.69778	5.56217	2.78867e-20	3.62499e-16	FALSE	0.593544	5.56213	0.00239879	1	FALSE
1	117050840	117052156	CD58	ENSG00000116815	5000	117057157	117113661	-	768	0	FALSE	-0.610446	4.16669	0.0396133	1	FALSE	-0.265297	4.1667	0.249819	1	FALSE	0.482046	4.1667	0.00559288	1	FALSE	-0.0560436	4.1667	0.792504	1	FALSE	0.102397	4.1667	0.965575	1	FALSE	-0.264227	4.1667	0.368423	1	FALSE	0.405904	4.16668	0.109669	1	FALSE
1	117671144	117671824	TRIM45	ENSG00000134253	-5934	117654807	117665209	-	768	10	FALSE	-0.74859	4.418	0.010625	1	FALSE	0.265777	4.41801	0.220768	1	FALSE	-0.00729788	4.418	0.913788	1	FALSE	-1.05818	4.418	9.51512e-06	0.109367	FALSE	-0.460068	4.418	0.414715	1	FALSE	1.00207	4.41801	3.55733e-07	0.00409413	FALSE	-0.117021	4.41797	0.747141	1	FALSE
1	117817153	117818664	RP11-39H13.1	ENSG00000235202	-19477	117838142	117863958	+	768	0	FALSE	-0.252496	4.15611	0.371952	1	FALSE	0.82594	4.15611	1.4395e-05	0.158331	FALSE	-0.449031	4.15611	0.00680902	1	FALSE	-0.431377	4.15611	0.0749133	1	FALSE	-0.558775	4.15611	0.27522	1	FALSE	0.260452	4.15611	0.289685	1	FALSE	-0.176097	4.15611	0.730229	1	FALSE
1	117881977	117883428	RP11-39H13.1	ENSG00000235202	18018	117838142	117863958	+	768	0	FALSE	-0.547963	4.44042	0.0500774	1	FALSE	0.961273	4.44042	1.57361e-07	0.00186079	FALSE	0.315724	4.44042	0.053396	1	FALSE	-1.14479	4.44042	5.01537e-07	0.00600541	FALSE	-1.49552	4.44042	0.00192732	1	FALSE	-0.152736	4.44042	0.458053	1	FALSE	-0.0964649	4.44042	0.751091	1	FALSE
1	117883510	117887990	RP11-188D8.1	ENSG00000271427	19530	117907521	117908095	-	768	6	FALSE	-1.11104	4.81295	3.75985e-05	0.429487	FALSE	0.154775	4.81297	0.464657	1	FALSE	0.255245	4.81296	0.119031	1	FALSE	-0.721736	4.81296	0.000762942	1	FALSE	-2.11895	4.81296	1.27468e-06	0.0157475	FALSE	0.961069	4.81297	8.3448e-07	0.00951057	FALSE	-0.0132007	4.81289	0.995283	1	FALSE
1	117908596	117909570	MAN1A2	ENSG00000198162	-500	117910071	118071494	+	768	768	TRUE	-0.14944	9.4939	0.111641	1	FALSE	-0.432011	9.49391	2.40166e-09	2.96437e-05	FALSE	-0.200116	9.4939	0.00481215	1	FALSE	0.337899	9.4939	9.03563e-06	0.10391	FALSE	0.118384	9.4939	0.353659	1	FALSE	0.445832	9.49391	4.98959e-09	5.99299e-05	FALSE	-0.0834012	9.49387	0.431953	1	FALSE
1	118076495	118082025	MAN1A2	ENSG00000198162	5000	117910071	118071494	+	768	138	TRUE	-0.159099	7.24474	0.18876	1	FALSE	0.626649	7.24475	2.07793e-13	2.68406e-09	FALSE	-0.168619	7.24474	0.0685515	1	FALSE	-0.371482	7.24475	0.000319806	1	FALSE	-0.866561	7.24474	5.07843e-06	0.0618959	FALSE	0.129155	7.24475	0.215796	1	FALSE	-0.163481	7.24471	0.237528	1	FALSE
1	118107154	118108522	VPS25P1	ENSG00000226755	14609	118092037	118092544	+	768	52	TRUE	-0.946122	5.21458	1.58228e-05	0.18394	FALSE	0.557463	5.21455	0.00013947	1	FALSE	-0.729569	5.21457	1.85618e-06	0.0222241	FALSE	-1.12832	5.21456	5.79513e-10	7.31867e-06	TRUE	-1.23772	5.21456	0.000230529	1	FALSE	1.56738	5.21454	1.87141e-31	2.48074e-27	TRUE	-0.585156	5.21466	0.0105808	1	FALSE
1	118112929	118116851	VPS25P1	ENSG00000226755	20384	118092037	118092544	+	768	0	FALSE	-0.761924	4.97657	0.000152167	1	FALSE	0.587832	4.97659	3.21655e-05	0.347419	FALSE	0.170317	4.97658	0.146114	1	FALSE	-0.566657	4.97659	0.000903917	1	FALSE	-0.501663	4.97658	0.0699497	1	FALSE	0.267777	4.97659	0.106909	1	FALSE	-0.351937	4.97652	0.121412	1	FALSE
1	118175995	118178433	FAM46C	ENSG00000183508	5000	118148556	118170994	+	768	726	TRUE	-0.0148108	9.86809	0.93833	1	FALSE	-0.835899	9.8681	3.86663e-14	5.01772e-10	TRUE	0.0959199	9.86809	0.344978	1	FALSE	0.270174	9.86809	0.0186054	1	FALSE	1.93725	9.86809	4.07763e-39	5.45709e-35	TRUE	-0.709447	9.8681	2.29859e-08	0.00027259	TRUE	-0.504921	9.86807	0.00274078	1	FALSE
1	118184762	118191511	AL365331.2	ENSG00000213262	-500	118183434	118184261	-	768	767	TRUE	-0.222227	12.29	0.172024	1	FALSE	-1.04748	12.29	3.43111e-17	4.52015e-13	TRUE	0.300745	12.29	0.00777406	1	FALSE	0.578462	12.29	3.45277e-06	0.0403283	FALSE	1.96402	12.29	1.20066e-31	1.60408e-27	TRUE	-1.27449	12.29	1.3095e-18	1.69188e-14	TRUE	-0.649541	12.29	0.000633415	1	FALSE
1	118191627	118211444	AL365331.2	ENSG00000213262	-7365	118183434	118184261	-	768	766	TRUE	0.655448	12.9364	8.8529e-10	1.12928e-05	FALSE	-0.42459	12.9364	2.61753e-06	0.029709	FALSE	0.0196728	12.9364	0.810084	1	FALSE	0.1239	12.9364	0.196372	1	FALSE	0.654027	12.9364	1.5478e-05	0.18617	FALSE	-0.528908	12.9364	3.38021e-07	0.00389299	FALSE	-0.141781	12.9364	0.301371	1	FALSE
1	118211562	118223058	SNORA40	ENSG00000212266	8184	118231243	118231364	-	768	563	TRUE	-0.131465	9.86234	0.361621	1	FALSE	-0.706483	9.86234	9.28059e-11	1.17047e-06	TRUE	0.193383	9.86234	0.0547987	1	FALSE	0.524543	9.86234	2.24077e-06	0.0263604	FALSE	1.17852	9.86234	2.73547e-12	3.56514e-08	TRUE	-0.553527	9.86235	9.04877e-06	0.0996541	FALSE	-0.314158	9.86232	0.0563557	1	FALSE
1	118223502	118226242	SNORA40	ENSG00000212266	5000	118231243	118231364	-	768	716	TRUE	-0.400525	9.43268	0.0125075	1	FALSE	-0.794962	9.43268	6.13658e-11	7.7597e-07	TRUE	0.0388923	9.43268	0.718828	1	FALSE	0.686696	9.43268	1.31969e-08	0.00016347	FALSE	1.23644	9.43268	2.89447e-11	3.75413e-07	TRUE	-0.169843	9.43268	0.21589	1	FALSE	-0.559095	9.43266	0.00250127	1	FALSE
1	118234619	118235138	SNORA40	ENSG00000212266	-3254	118231243	118231364	-	768	31	FALSE	-0.426186	4.76934	0.114861	1	FALSE	-0.535866	4.76935	0.00714689	1	FALSE	1.13177	4.76934	2.28613e-12	2.98523e-08	FALSE	-0.343953	4.76934	0.13935	1	FALSE	0.408241	4.76934	0.195234	1	FALSE	-0.569149	4.76935	0.00781105	1	FALSE	-0.621252	4.76931	0.0409642	1	FALSE
1	118235960	118237650	SNORA40	ENSG00000212266	-4595	118231243	118231364	-	768	23	FALSE	-0.286045	5.42198	0.178395	1	FALSE	-0.140356	5.42201	0.436233	1	FALSE	0.87228	5.422	5.90066e-11	7.62896e-07	FALSE	-0.591874	5.422	0.000764169	1	FALSE	0.567381	5.422	0.025244	1	FALSE	-0.657173	5.42202	0.000183296	1	FALSE	-0.287606	5.42191	0.191174	1	FALSE
1	118276487	118279002	RP11-134N8.2	ENSG00000270719	-33622	118242651	118242864	-	768	133	TRUE	-0.298636	6.13077	0.0598805	1	FALSE	-0.122305	6.13081	0.329393	1	FALSE	0.810807	6.13079	2.4201e-15	3.20009e-11	TRUE	-0.513762	6.1308	0.000115896	1	FALSE	-0.190897	6.13079	0.425705	1	FALSE	-0.148442	6.13081	0.268962	1	FALSE	-0.424531	6.1307	0.0157471	1	FALSE
1	118293943	118305394	AL390877.1	ENSG00000228217	15314	118320709	118321128	-	768	683	TRUE	0.817849	10.8388	9.82894e-11	1.26695e-06	TRUE	-0.156129	10.8389	0.152249	1	FALSE	0.362054	10.8388	0.000305945	1	FALSE	-0.277309	10.8389	0.0223112	1	FALSE	0.468264	10.8389	0.0114679	1	FALSE	-1.15627	10.8389	9.50502e-20	1.23299e-15	TRUE	-0.284912	10.8388	0.0858993	1	FALSE
1	118323834	118325599	AL390877.1	ENSG00000228217	-2705	118320709	118321128	-	768	757	TRUE	0.579645	9.96194	3.00538e-07	0.00367738	FALSE	-0.165934	9.96193	0.0789901	1	FALSE	0.402768	9.96193	3.47406e-06	0.041178	FALSE	-0.181865	9.96193	0.0846415	1	FALSE	0.311705	9.96193	0.0565398	1	FALSE	-0.967659	9.96193	7.43722e-19	9.61856e-15	TRUE	-0.128931	9.96194	0.364716	1	FALSE
1	118326324	118328440	AL390877.1	ENSG00000228217	-5195	118320709	118321128	-	768	755	TRUE	0.60472	10.1845	2.45873e-08	0.000307218	FALSE	-0.254453	10.1845	0.00509228	1	FALSE	0.316749	10.1845	0.000171282	1	FALSE	-0.166456	10.1845	0.101268	1	FALSE	0.407688	10.1845	0.00915854	1	FALSE	-0.829658	10.1845	2.32941e-15	2.96069e-11	TRUE	-0.00983972	10.1845	0.955818	1	FALSE
1	118352535	118353872	AL390877.1	ENSG00000228217	-31406	118320709	118321128	-	768	139	TRUE	-0.12322	6.18297	0.570732	1	FALSE	-0.469778	6.18298	0.00116768	1	FALSE	1.14044	6.18297	1.54651e-20	2.06861e-16	TRUE	-0.114532	6.18297	0.516052	1	FALSE	-0.100809	6.18297	0.782623	1	FALSE	-0.980312	6.18298	1.10327e-08	0.000131741	TRUE	-0.611369	6.18296	0.00654573	1	FALSE
1	118364106	118364608	GDAP2	ENSG00000196505	41498	118406107	118472253	-	768	200	TRUE	-0.0380569	5.41773	0.897875	1	FALSE	0.0360639	5.41774	0.71883	1	FALSE	0.175751	5.41773	0.0889149	1	FALSE	-0.233194	5.41774	0.0833066	1	FALSE	0.224594	5.41774	0.211809	1	FALSE	0.045905	5.41774	0.776999	1	FALSE	-0.320192	5.41769	0.0326804	1	FALSE
1	118743593	118745094	SPAG17	ENSG00000155761	-15746	118693020	118727846	-	768	1	FALSE	1.23983	4.20129	8.55068e-06	0.100505	FALSE	-0.458895	4.20131	0.0803471	1	FALSE	-0.232127	4.2013	0.365198	1	FALSE	-0.0616687	4.20131	0.930109	1	FALSE	-0.711371	4.2013	0.236556	1	FALSE	-0.040822	4.20131	1	1	FALSE	-0.444475	4.20126	0.434248	1	FALSE
1	118823702	118824077	RNA5SP56	ENSG00000222209	-16589	118806995	118807112	-	768	37	FALSE	-0.223808	4.506	0.599816	1	FALSE	-1.15643	4.50607	3.53322e-06	0.0399041	FALSE	1.06103	4.50602	6.04512e-08	0.000751892	FALSE	0.305197	4.50604	0.20187	1	FALSE	0.390093	4.50604	0.362715	1	FALSE	-0.747112	4.50607	0.00735159	1	FALSE	-0.797666	4.50583	0.0532141	1	FALSE
1	118877480	118878990	RNA5SP56	ENSG00000222209	-70367	118806995	118807112	-	768	0	FALSE	-0.084387	4.15127	0.943503	1	FALSE	-0.0307113	4.15127	1	1	FALSE	-0.148941	4.15127	0.59868	1	FALSE	0.0802651	4.15127	0.693523	1	FALSE	-0.0228397	4.15127	0.995794	1	FALSE	0.242103	4.15127	0.354205	1	FALSE	-0.0513462	4.15126	0.958794	1	FALSE
1	119106739	119107875	PSMC1P12	ENSG00000226126	49080	119156956	119158269	-	768	0	FALSE	0.160292	4.20746	0.631301	1	FALSE	-0.689601	4.20748	0.00162562	1	FALSE	0.711438	4.20747	0.000149443	1	FALSE	0.00589333	4.20748	0.893936	1	FALSE	0.590309	4.20747	0.129284	1	FALSE	-0.65697	4.20748	0.0102741	1	FALSE	-0.514713	4.20742	0.129686	1	FALSE
1	119544529	119545100	RP4-712E4.2	ENSG00000239216	-500	119543241	119544028	-	768	9	FALSE	-0.150939	4.27544	0.892752	1	FALSE	-0.327081	4.27548	0.133389	1	FALSE	0.029257	4.27546	0.857514	1	FALSE	-0.906021	4.27547	0.000563246	1	FALSE	1.92186	4.27547	2.17996e-13	2.85378e-09	FALSE	0.0375937	4.27549	1	1	FALSE	-0.525401	4.27535	0.110016	1	FALSE
1	120093537	120096377	HSD3BP3	ENSG00000249798	5000	120081132	120088536	+	768	9	FALSE	-0.294191	5.00891	0.313029	1	FALSE	-0.58811	5.00894	0.00141985	1	FALSE	1.21158	5.00892	7.64184e-16	1.01209e-11	FALSE	-1.06453	5.00893	1.23949e-06	0.0147016	FALSE	-1.44106	5.00893	0.000433907	1	FALSE	-0.0878841	5.00895	0.569638	1	FALSE	0.28595	5.00883	0.275301	1	FALSE
1	120102898	120104275	GAPDHP27	ENSG00000239873	-500	120101378	120102397	-	768	385	TRUE	-0.336763	7.06488	0.118501	1	FALSE	-0.880571	7.06488	4.98831e-08	0.000597999	TRUE	1.43439	7.06488	1.68297e-28	2.25956e-24	TRUE	-0.324821	7.06488	0.0713676	1	FALSE	-1.56486	7.06488	3.6573e-06	0.0447471	FALSE	-0.620844	7.06488	0.000599061	1	FALSE	-0.0307905	7.06489	0.935123	1	FALSE
1	120190897	120191524	ZNF697	ENSG00000143067	-500	120162045	120190396	-	768	383	TRUE	0.196931	6.14982	0.230309	1	FALSE	-0.394149	6.14981	0.00450911	1	FALSE	0.752994	6.14982	1.05169e-10	1.35668e-06	TRUE	-0.191035	6.14982	0.207808	1	FALSE	-0.38964	6.14982	0.124016	1	FALSE	-0.462738	6.14981	0.00211847	1	FALSE	-0.236366	6.14983	0.247429	1	FALSE
1	120612741	120613146	NOTCH2	ENSG00000134250	-500	120492743	120612240	-	768	2	FALSE	0.280321	4.20212	0.379234	1	FALSE	-0.640104	4.20215	0.00340096	1	FALSE	-0.0297271	4.20213	0.813777	1	FALSE	-0.0669499	4.20214	1	1	FALSE	1.6634	4.20214	2.4894e-09	3.18718e-05	FALSE	-0.285174	4.20215	0.349133	1	FALSE	-0.66764	4.20206	0.0427058	1	FALSE
1	120624699	120625500	RP11-114O18.1	ENSG00000273406	5000	120619223	120619698	+	768	7	FALSE	0.0120814	4.40534	1	1	FALSE	-0.60775	4.4054	0.00224391	1	FALSE	-0.52977	4.40536	0.0128087	1	FALSE	-0.3597	4.40538	0.161922	1	FALSE	2.17225	4.40537	7.8231e-21	1.03867e-16	FALSE	-0.048387	4.4054	0.883139	1	FALSE	0.0422632	4.4052	1	1	FALSE
1	120636134	120637106	RP11-114O18.1	ENSG00000273406	16435	120619223	120619698	+	768	26	FALSE	-1.22536	4.69063	0.00057063	1	FALSE	-2.02106	4.6907	1.27603e-12	1.63894e-08	FALSE	-0.443905	4.69065	0.0851949	1	FALSE	-1.24202	4.69068	7.3378e-05	0.806645	FALSE	3.59554	4.69067	7.8128e-44	1.04676e-39	FALSE	0.091391	4.69071	0.784534	1	FALSE	-0.213936	4.69046	0.708261	1	FALSE
1	120659322	120661105	RNU6-465P	ENSG00000207149	-8456	120669562	120669662	+	768	2	FALSE	-0.19741	4.36058	0.734757	1	FALSE	-0.372968	4.3606	0.121013	1	FALSE	-0.220949	4.36059	0.429165	1	FALSE	-1.04996	4.36059	0.000109736	1	FALSE	-0.611042	4.36059	0.250049	1	FALSE	1.65028	4.3606	2.94636e-13	3.69915e-09	FALSE	-0.757609	4.36055	0.061562	1	FALSE
1	120664610	120665421	RNU6-465P	ENSG00000207149	-4140	120669562	120669662	+	768	8	FALSE	-0.478777	4.46046	0.139288	1	FALSE	-0.588104	4.46049	0.00993333	1	FALSE	-0.469563	4.46047	0.0400824	1	FALSE	-1.29396	4.46048	7.00438e-07	0.00836112	FALSE	0.732114	4.46048	0.0463869	1	FALSE	1.7444	4.46049	6.25558e-18	8.06032e-14	FALSE	-0.561363	4.4604	0.223349	1	FALSE
1	120674663	120675581	RNU6-465P	ENSG00000207149	5000	120669562	120669662	+	768	48	TRUE	-0.34252	4.77835	0.257574	1	FALSE	-0.691591	4.77836	0.00160893	1	FALSE	-0.853792	4.77835	0.000117568	1	FALSE	-1.58927	4.77836	6.65996e-09	8.29565e-05	TRUE	0.314737	4.77836	0.432133	1	FALSE	2.27417	4.77837	6.08612e-38	8.10975e-34	TRUE	-1.22211	4.7783	0.000587383	1	FALSE
1	120683477	120688291	RP6-42F4.1	ENSG00000273131	5028	120693320	120697146	-	768	396	TRUE	-0.0255182	8.59516	0.879699	1	FALSE	-0.183378	8.59516	0.102641	1	FALSE	-0.327718	8.59516	0.00297461	1	FALSE	-1.08131	8.59516	8.61049e-17	1.13529e-12	TRUE	-0.161683	8.59516	0.480667	1	FALSE	1.40434	8.59516	3.55604e-42	4.74838e-38	TRUE	-0.620731	8.59515	0.000396813	1	FALSE
1	120749702	120757835	RP6-42F4.1	ENSG00000273131	-52555	120693320	120697146	-	768	38	FALSE	0.287768	6.48188	0.0443742	1	FALSE	-0.539157	6.48193	4.74337e-06	0.0533487	FALSE	-0.65391	6.4819	1.47518e-08	0.000185149	FALSE	-0.0385958	6.48192	0.773651	1	FALSE	1.98818	6.48191	3.20304e-37	4.28375e-33	FALSE	-0.047496	6.48194	0.685614	1	FALSE	-0.239286	6.48175	0.176868	1	FALSE
1	120757926	120760613	RP6-42F4.1	ENSG00000273131	-60779	120693320	120697146	-	768	10	FALSE	0.11164	5.03594	0.621665	1	FALSE	-0.511296	5.03602	0.000991091	1	FALSE	-0.395042	5.03597	0.00917302	1	FALSE	-0.00360344	5.036	0.973779	1	FALSE	1.51064	5.03599	1.60803e-13	2.10668e-09	FALSE	0.186822	5.03603	0.303414	1	FALSE	-0.209564	5.03574	0.338688	1	FALSE
1	120784162	120787276	RP11-439A17.7	ENSG00000236933	48533	120835810	120838343	-	768	2	FALSE	0.16574	4.717	0.37502	1	FALSE	-0.682928	4.71706	7.6392e-05	0.805401	FALSE	-0.365839	4.71702	0.0269075	1	FALSE	0.578083	4.71704	0.000183154	1	FALSE	0.432692	4.71704	0.0862043	1	FALSE	0.0196959	4.71707	0.993075	1	FALSE	0.255683	4.71684	0.422333	1	FALSE
1	120787516	120791939	RP11-439A17.7	ENSG00000236933	43870	120835810	120838343	-	768	3	FALSE	0.203031	5.15179	0.279609	1	FALSE	-0.608043	5.15187	5.53636e-05	0.588903	FALSE	-0.174454	5.15182	0.280117	1	FALSE	-0.240348	5.15185	0.171627	1	FALSE	1.18788	5.15184	8.67065e-08	0.00109215	FALSE	0.528289	5.15188	0.000817764	1	FALSE	-0.481345	5.15161	0.0258441	1	FALSE
1	120796110	120804129	RP11-439A17.7	ENSG00000236933	31680	120835810	120838343	-	768	1	FALSE	0.274513	5.31798	0.109756	1	FALSE	-0.720259	5.31804	6.71003e-07	0.00778699	FALSE	-0.277138	5.318	0.0508151	1	FALSE	-0.0352837	5.31802	0.83653	1	FALSE	1.40754	5.31801	1.34085e-12	1.75048e-08	FALSE	0.152615	5.31804	0.339465	1	FALSE	-0.0463578	5.31783	0.790466	1	FALSE
1	121213453	121214056	AL592494.5	ENSG00000227082	8469	121138614	121204983	+	768	2	FALSE	-0.26469	4.14989	0.253127	1	FALSE	0.112879	4.14989	0.806598	1	FALSE	-0.346302	4.14989	0.092614	1	FALSE	0.0636995	4.14989	0.9034	1	FALSE	-0.482315	4.14989	0.398177	1	FALSE	0.357973	4.14989	0.13619	1	FALSE	0.348879	4.1499	0.284522	1	FALSE
1	142890156	142891274	RP11-423O2.7	ENSG00000231182	59710	142950985	142956716	-	768	631	TRUE	-0.640039	8.48768	0.000218332	1	FALSE	-0.33645	8.48769	0.00854662	1	FALSE	0.415453	8.48768	0.00036741	1	FALSE	0.367389	8.48768	0.00536544	1	FALSE	0.389403	8.48768	0.0724289	1	FALSE	-0.38122	8.48769	0.00890839	1	FALSE	-0.0676772	8.48766	0.747289	1	FALSE
1	143468133	143468419	RP11-435B5.4	ENSG00000185044	-500	143382245	143467632	-	768	3	FALSE	0.131172	4.1659	0.658317	1	FALSE	0.103855	4.16591	0.393773	1	FALSE	0.00620323	4.16591	1	1	FALSE	-0.536288	4.16591	0.021428	1	FALSE	0.668727	4.16591	0.0499936	1	FALSE	-0.216465	4.16592	0.415168	1	FALSE	0.181422	4.16587	0.812613	1	FALSE
1	143745918	143746081	RP6-206I17.1	ENSG00000223804	-500	143744199	143745417	-	768	282	TRUE	0.584586	5.05156	0.000377068	1	FALSE	-0.429936	5.0517	0.00339827	1	FALSE	-0.594583	5.05161	1.42299e-05	0.164999	FALSE	0.516653	5.05166	0.000113282	1	FALSE	-0.284656	5.05164	0.361126	1	FALSE	0.218395	5.05172	0.156387	1	FALSE	-0.122597	5.0512	0.551519	1	FALSE
1	144533133	144533537	RNU1-59P	ENSG00000201699	-500	144534038	144534199	+	768	15	FALSE	0.530799	4.21967	0.0557529	1	FALSE	-0.27381	4.21969	0.260821	1	FALSE	0.0951783	4.21968	0.47838	1	FALSE	-0.415045	4.21968	0.141447	1	FALSE	-0.29065	4.21968	0.752103	1	FALSE	0.22921	4.21969	0.432096	1	FALSE	-0.0577045	4.21962	0.729246	1	FALSE
1	144567390	144568789	RP11-640M9.2	ENSG00000225241	-24573	144593363	144621656	+	768	2	FALSE	0.646651	4.66078	0.000252229	1	FALSE	0.810261	4.66076	1.33597e-08	0.00016228	FALSE	-0.436462	4.66077	0.00352296	1	FALSE	-0.36144	4.66076	0.0573657	1	FALSE	-0.863541	4.66077	0.0103762	1	FALSE	-0.479054	4.66075	0.0102377	1	FALSE	-0.329032	4.66084	0.156396	1	FALSE
1	144687793	144688878	WI2-1896O14.1	ENSG00000215861	-7823	144676874	144679969	-	768	195	TRUE	0.256546	5.59911	0.112799	1	FALSE	0.00178852	5.5992	0.981392	1	FALSE	-0.668691	5.59915	1.14729e-07	0.00141897	FALSE	0.51787	5.59917	3.88239e-05	0.433779	FALSE	-0.569629	5.59917	0.0313654	1	FALSE	0.19473	5.59922	0.192949	1	FALSE	-0.0807198	5.5989	0.65748	1	FALSE
1	144689133	144692928	WI2-1896O14.1	ENSG00000215861	-9163	144676874	144679969	-	768	36	FALSE	0.322845	6.49545	0.0227942	1	FALSE	0.118351	6.49551	0.286919	1	FALSE	-0.515626	6.49547	3.54024e-06	0.0419519	FALSE	0.405846	6.49549	0.00053956	1	FALSE	-0.409674	6.49548	0.0851938	1	FALSE	-0.0039513	6.49551	0.954375	1	FALSE	-0.205952	6.4953	0.21611	1	FALSE
1	144702402	144703613	WI2-1896O14.1	ENSG00000215861	-22432	144676874	144679969	-	768	534	TRUE	0.201133	7.36522	0.142294	1	FALSE	0.296533	7.36524	0.00502786	1	FALSE	-0.99614	7.36523	2.61513e-21	3.50009e-17	TRUE	0.262369	7.36524	0.0217902	1	FALSE	-0.577149	7.36523	0.00837193	1	FALSE	0.527709	7.36525	4.71701e-06	0.0524389	FALSE	-0.291138	7.36517	0.0814225	1	FALSE
1	144706485	144710458	WI2-1896O14.1	ENSG00000215861	-26515	144676874	144679969	-	768	523	TRUE	0.196442	8.18807	0.132582	1	FALSE	0.15696	8.18808	0.121758	1	FALSE	-1.04996	8.18807	1.16317e-25	1.56074e-21	TRUE	0.334584	8.18807	0.00217984	1	FALSE	-0.851237	8.18807	5.05585e-05	0.596995	FALSE	0.636534	8.18808	4.55447e-09	5.47539e-05	FALSE	-0.138497	8.18804	0.388781	1	FALSE
1	144811017	144811243	NBPF9	ENSG00000168614	-500	144811744	144830301	+	768	124	TRUE	-0.183177	4.73416	0.479512	1	FALSE	0.0838136	4.73417	0.781857	1	FALSE	0.304324	4.73416	0.0154538	1	FALSE	-0.299676	4.73417	0.0684187	1	FALSE	-0.117575	4.73417	0.971178	1	FALSE	0.222758	4.73418	0.143672	1	FALSE	-0.628366	4.73412	0.00234111	1	FALSE
1	145128172	145131869	NUDT4P1	ENSG00000177144	7155	145139025	145139569	-	768	391	TRUE	-0.0709376	8.16187	0.585185	1	FALSE	0.0861398	8.16187	0.362983	1	FALSE	-0.0126661	8.16187	0.915141	1	FALSE	-0.450196	8.16187	3.58304e-05	0.401085	FALSE	-0.418044	8.16187	0.0261422	1	FALSE	0.613713	8.16187	8.7656e-10	1.06476e-05	FALSE	-0.357755	8.16187	0.0121774	1	FALSE
1	145140070	145140446	NUDT4P1	ENSG00000177144	-500	145139025	145139569	-	768	507	TRUE	0.0477883	6.82625	0.732178	1	FALSE	-1.06919	6.82635	6.78758e-16	8.89309e-12	TRUE	-0.278374	6.82629	0.0266887	1	FALSE	-0.622329	6.82632	1.39239e-05	0.158844	FALSE	2.16777	6.82631	3.89926e-40	5.21994e-36	TRUE	0.57931	6.82637	1.24824e-05	0.136832	FALSE	-0.673853	6.82599	0.000713435	1	FALSE
1	145143832	145144739	NUDT4P1	ENSG00000177144	-4262	145139025	145139569	-	768	16	FALSE	-0.643332	4.70394	0.013848	1	FALSE	-0.365714	4.70399	0.0744632	1	FALSE	-0.443097	4.70396	0.0319392	1	FALSE	-1.41246	4.70397	6.13212e-09	7.64124e-05	FALSE	0.432545	4.70397	0.230168	1	FALSE	1.78453	4.704	3.61215e-25	4.74528e-21	FALSE	-0.620503	4.70381	0.0432949	1	FALSE
1	145154054	145155229	RNU6-1071P	ENSG00000201789	-4213	145149740	145149840	-	768	7	FALSE	-0.824517	4.51894	0.00664201	1	FALSE	-0.57231	4.51897	0.0148792	1	FALSE	-0.00673654	4.51895	0.915145	1	FALSE	-0.769434	4.51896	0.00198982	1	FALSE	1.43114	4.51896	7.65356e-06	0.0928606	FALSE	0.933888	4.51897	3.49602e-05	0.375857	FALSE	-0.41147	4.51886	0.297162	1	FALSE
1	145158837	145160400	RNU6-1071P	ENSG00000201789	-8996	145149740	145149840	-	768	2	FALSE	-1.11173	4.4222	0.000303006	1	FALSE	-0.249186	4.4222	0.291361	1	FALSE	0.303324	4.4222	0.166565	1	FALSE	-0.643478	4.4222	0.0200761	1	FALSE	-0.580422	4.4222	0.191613	1	FALSE	1.374	4.4222	7.84892e-10	9.54193e-06	FALSE	-1.2413	4.42221	0.000855325	1	FALSE
1	145182683	145183580	RP11-458D21.6	ENSG00000272709	16757	145200338	145200891	-	768	29	FALSE	-0.936959	4.72061	0.00512451	1	FALSE	-1.56871	4.72071	3.16041e-09	3.89173e-05	FALSE	-0.0715449	4.72065	0.81247	1	FALSE	-1.37949	4.72068	1.22588e-06	0.0145414	FALSE	3.32038	4.72067	5.64368e-43	7.56027e-39	FALSE	0.0120504	4.72073	1	1	FALSE	-0.709873	4.72037	0.0849463	1	FALSE
1	145194296	145195337	RP11-458D21.6	ENSG00000272709	5000	145200338	145200891	-	768	5	FALSE	-0.0537256	4.5084	0.93073	1	FALSE	-1.27019	4.5085	3.71756e-08	0.00044685	FALSE	0.0445787	4.50843	0.738078	1	FALSE	-0.711263	4.50847	0.00437595	1	FALSE	2.79109	4.50846	9.04807e-37	1.21e-32	FALSE	-0.637145	4.50851	0.00963278	1	FALSE	-0.415888	4.50817	0.167097	1	FALSE
1	145208385	145208618	NOTCH2NL	ENSG00000213240	-500	145209119	145282832	+	768	213	TRUE	0.178002	4.87561	0.402317	1	FALSE	-0.878169	4.87574	1.23655e-06	0.0142067	FALSE	0.0482296	4.87566	0.7332	1	FALSE	-0.43688	4.8757	0.0361674	1	FALSE	2.0749	4.87569	2.63951e-23	3.51292e-19	TRUE	-0.442169	4.87576	0.0311514	1	FALSE	-0.135436	4.8753	0.742225	1	FALSE
1	145395341	145400044	RNVU1-6	ENSG00000201558	12420	145382757	145382920	+	768	77	TRUE	0.199272	6.45007	0.0884991	1	FALSE	-0.618788	6.4501	1.04481e-10	1.31688e-06	FALSE	-0.128729	6.45008	0.160487	1	FALSE	0.158915	6.45009	0.0975036	1	FALSE	0.475382	6.45009	0.00250264	1	FALSE	0.359618	6.45011	0.000407835	1	FALSE	-0.125619	6.44999	0.390909	1	FALSE
1	145426930	145429190	TXNIP	ENSG00000117289	-9278	145438469	145442635	+	768	34	FALSE	0.909967	5.33241	7.04782e-07	0.00854971	FALSE	-0.965263	5.33258	1.70477e-08	0.000206618	FALSE	-0.320212	5.33247	0.0540622	1	FALSE	-0.574583	5.33252	0.00165457	1	FALSE	1.59016	5.33251	1.45921e-11	1.8961e-07	FALSE	0.106685	5.3326	0.560942	1	FALSE	-0.0709671	5.33198	0.765457	1	FALSE
1	145434241	145437968	TXNIP	ENSG00000117289	-500	145438469	145442635	+	768	251	TRUE	0.715599	7.30216	3.23756e-07	0.00395856	TRUE	-1.02917	7.30221	9.91285e-18	1.3084e-13	TRUE	-0.455929	7.30218	9.8773e-05	1	FALSE	-0.274031	7.3022	0.0416405	1	FALSE	1.33878	7.30219	1.48667e-13	1.94799e-09	TRUE	0.429126	7.30222	0.000720747	1	FALSE	0.0144759	7.30205	0.92189	1	FALSE
1	145448639	145451235	POLR3GL	ENSG00000121851	5000	145456236	145470387	-	768	410	TRUE	0.615681	8.37212	6.23752e-05	0.705089	FALSE	-0.441729	8.37214	0.00061072	1	FALSE	-0.546071	8.37213	1.56239e-05	0.180862	FALSE	-0.549372	8.37213	0.000166592	1	FALSE	0.0154163	8.37213	0.891745	1	FALSE	0.895733	8.37214	5.11012e-12	6.35086e-08	TRUE	0.0716488	8.3721	0.683386	1	FALSE
1	145574500	145574732	PIAS3	ENSG00000131788	-500	145575233	145580322	+	768	5	FALSE	-1.54772	4.58822	0.00205825	1	FALSE	-2.09098	4.58809	4.14534e-08	0.000497648	FALSE	-2.1912	4.58817	1.38724e-09	1.76873e-05	FALSE	3.88271	4.58813	3.44338e-48	4.62928e-44	FALSE	-1.55644	4.58814	0.0372753	1	FALSE	-1.63168	4.58807	0.00016723	1	FALSE	-1.71306	4.58852	0.00390651	1	FALSE
1	145969934	145970476	RNVU1-7	ENSG00000207418	-500	145969270	145969433	-	768	54	TRUE	0.949465	4.83816	6.27785e-11	8.10534e-07	TRUE	-0.434384	4.83821	0.00152718	1	FALSE	0.195124	4.83818	0.0902092	1	FALSE	-0.606305	4.8382	0.000137421	1	FALSE	-0.84371	4.83819	0.00102002	1	FALSE	0.0801514	4.83822	0.716192	1	FALSE	0.0239733	4.83802	0.727887	1	FALSE
1	145990803	145992008	RP11-94I2.1	ENSG00000229828	-19082	146011091	146025308	+	768	47	TRUE	1.03279	5.17218	2.08434e-09	2.64816e-05	TRUE	-0.774294	5.17223	4.56652e-06	0.0513825	FALSE	-0.266309	5.1722	0.0662803	1	FALSE	-0.389576	5.17221	0.0265759	1	FALSE	-0.832384	5.17221	0.00708095	1	FALSE	0.688614	5.17224	1.34192e-05	0.146913	FALSE	-0.0919439	5.17204	0.845183	1	FALSE
1	145998112	146000091	RP11-94I2.1	ENSG00000229828	-10999	146011091	146025308	+	768	0	FALSE	0.921916	4.24974	8.47795e-06	0.0996753	FALSE	-0.335565	4.24977	0.102118	1	FALSE	-0.041838	4.24975	0.997144	1	FALSE	-0.141471	4.24976	0.682223	1	FALSE	-0.0999188	4.24976	0.886594	1	FALSE	-0.0470679	4.24977	1	1	FALSE	-0.513156	4.24968	0.126457	1	FALSE
1	146003356	146004444	RP11-94I2.1	ENSG00000229828	-6646	146011091	146025308	+	768	146	TRUE	0.418107	6.61906	0.125794	1	FALSE	-1.4737	6.61911	1.90553e-09	2.35638e-05	TRUE	-0.8637	6.61908	0.000176819	1	FALSE	-2.20532	6.61909	1.76281e-14	2.30628e-10	TRUE	-3.05521	6.61909	5.73514e-08	0.000723832	TRUE	2.50864	6.61911	6.52172e-38	8.68955e-34	TRUE	-0.14324	6.61896	0.727142	1	FALSE
1	146008227	146010235	RP11-94I2.1	ENSG00000229828	-855	146011091	146025308	+	768	24	FALSE	0.657337	5.34513	1.08237e-05	0.126638	FALSE	-0.466562	5.34518	0.00028495	1	FALSE	-0.0656435	5.34515	0.605113	1	FALSE	-0.285006	5.34516	0.0418613	1	FALSE	0.399671	5.34516	0.0570796	1	FALSE	0.101601	5.34519	0.442662	1	FALSE	0.0728638	5.345	0.658806	1	FALSE
1	146874113	146874993	OR13Z1P	ENSG00000226653	-15783	146890777	146891610	+	768	8	FALSE	2.47324	4.29398	6.74493e-27	9.03889e-23	FALSE	-0.480418	4.294	0.0930066	1	FALSE	-0.618728	4.29398	0.0175582	1	FALSE	-0.967158	4.29399	0.00228413	1	FALSE	-0.751089	4.29399	0.119135	1	FALSE	-0.608778	4.294	0.067252	1	FALSE	-1.20336	4.29393	0.0152892	1	FALSE
1	147010135	147011189	BCL9	ENSG00000116128	-1992	147013182	147098017	+	768	0	FALSE	1.07329	4.18924	2.16095e-06	0.0258969	FALSE	-0.368002	4.18925	0.1052	1	FALSE	-0.432014	4.18924	0.0267757	1	FALSE	-0.154486	4.18925	0.614754	1	FALSE	0.0665466	4.18925	1	1	FALSE	0.221058	4.18926	0.232258	1	FALSE	-0.522717	4.18919	0.0994512	1	FALSE
1	147011964	147012681	BCL9	ENSG00000116128	-500	147013182	147098017	+	768	42	TRUE	1.92658	4.67956	3.08926e-14	4.06609e-10	TRUE	-1.98669	4.67987	2.07951e-12	2.66656e-08	TRUE	-0.646087	4.67967	0.0136293	1	FALSE	-0.00812864	4.67977	1	1	FALSE	1.51392	4.67974	4.10062e-05	0.486169	FALSE	-0.659255	4.67992	0.0282251	1	FALSE	-0.974583	4.6788	0.0179162	1	FALSE
1	147143119	147143162	ACP6	ENSG00000162836	-500	147114034	147142618	-	768	131	TRUE	0.531531	4.52769	0.0226221	1	FALSE	-1.16424	4.5277	7.53445e-08	0.000898935	TRUE	-0.319821	4.52769	0.105118	1	FALSE	-0.471088	4.5277	0.0446293	1	FALSE	2.70281	4.5277	7.29923e-43	9.77658e-39	TRUE	-0.725828	4.52771	0.0014455	1	FALSE	-0.563555	4.52765	0.18216	1	FALSE
1	147399732	147400005	GPR89B	ENSG00000188092	-500	147400506	147465571	+	768	84	TRUE	0.352923	4.47721	0.100782	1	FALSE	-0.36009	4.47721	0.0508638	1	FALSE	0.323342	4.47721	0.0665753	1	FALSE	0.125077	4.47721	0.518015	1	FALSE	0.0153574	4.47721	0.9124	1	FALSE	-0.294594	4.47721	0.272199	1	FALSE	-0.472735	4.47721	0.115055	1	FALSE
1	147511668	147512185	RNVU1-9	ENSG00000206585	-500	147511004	147511167	-	768	31	FALSE	0.889125	4.73463	1.68081e-07	0.00207025	FALSE	-0.288159	4.7347	0.132938	1	FALSE	-0.137922	4.73466	0.303741	1	FALSE	-0.239011	4.73468	0.180547	1	FALSE	-0.512249	4.73467	0.0844161	1	FALSE	0.0669223	4.73471	0.772183	1	FALSE	-0.0134604	4.73448	1	1	FALSE
1	147532582	147533938	XXyac-YX155B6.2	ENSG00000227778	-18929	147552868	147566056	+	768	102	TRUE	1.17539	5.76398	4.81971e-13	6.30948e-09	TRUE	-0.692928	5.76407	9.87064e-06	0.109426	FALSE	-0.116738	5.76401	0.405149	1	FALSE	-0.0834287	5.76404	0.662069	1	FALSE	-0.82484	5.76403	0.00447114	1	FALSE	0.0695424	5.76408	0.61149	1	FALSE	-0.0895873	5.76375	0.759803	1	FALSE
1	147540191	147541767	XXyac-YX155B6.2	ENSG00000227778	-11100	147552868	147566056	+	768	0	FALSE	0.87956	4.31823	6.84423e-05	0.771551	FALSE	-0.431601	4.31827	0.0530377	1	FALSE	-0.20092	4.31824	0.244361	1	FALSE	-0.00645392	4.31825	0.998055	1	FALSE	0.0326675	4.31825	0.802338	1	FALSE	0.119734	4.31827	0.6095	1	FALSE	-0.502172	4.31813	0.110953	1	FALSE
1	147545797	147546638	XXyac-YX155B6.2	ENSG00000227778	-6229	147552868	147566056	+	768	50	TRUE	0.00290923	5.17225	1	1	FALSE	-1.19902	5.17231	8.05888e-06	0.089655	FALSE	-0.866078	5.17227	0.000654277	1	FALSE	-2.02963	5.17229	1.01946e-10	1.29839e-06	TRUE	-2.67143	5.17228	2.40994e-05	0.28806	FALSE	2.54435	5.17232	1.1161e-33	1.48229e-29	TRUE	-0.12908	5.17208	0.83182	1	FALSE
1	147549994	147551915	XXyac-YX155B6.2	ENSG00000227778	-952	147552868	147566056	+	768	8	FALSE	0.606254	4.78846	0.00208792	1	FALSE	-0.0635164	4.78849	0.780559	1	FALSE	-0.387808	4.78847	0.0154365	1	FALSE	-0.0690899	4.78848	0.768019	1	FALSE	0.83995	4.78847	0.000893071	1	FALSE	-0.212343	4.78849	0.221524	1	FALSE	-0.187667	4.78839	0.51612	1	FALSE
1	147735097	147735250	RNU1-120P	ENSG00000199879	-500	147735751	147735907	+	768	61	TRUE	0.549044	4.40812	0.021009	1	FALSE	-0.405412	4.40813	0.0347853	1	FALSE	-0.321718	4.40812	0.134267	1	FALSE	-0.76548	4.40813	0.00221782	1	FALSE	-1.21313	4.40813	0.00127343	1	FALSE	1.02623	4.40813	1.74429e-07	0.00202582	TRUE	0.223622	4.40809	0.527477	1	FALSE
1	147753356	147754057	RP11-495P10.6	ENSG00000234283	-500	147744014	147752855	-	768	2	FALSE	0.707024	4.15512	0.0024213	1	FALSE	0.154706	4.1551	0.624827	1	FALSE	-0.475085	4.15511	0.00826154	1	FALSE	-0.202519	4.15511	0.460485	1	FALSE	-0.0459086	4.15511	1	1	FALSE	0.0709091	4.1551	0.501815	1	FALSE	-0.173294	4.15515	0.763408	1	FALSE
1	147774664	147776207	RP11-495P10.5	ENSG00000238107	5000	147767287	147769663	+	768	57	TRUE	1.21135	5.23461	5.78272e-13	7.56611e-09	TRUE	0.00136995	5.23459	1	1	FALSE	-0.423497	5.2346	0.00327723	1	FALSE	-0.539608	5.23459	0.00411752	1	FALSE	-0.696634	5.2346	0.0340446	1	FALSE	0.0578724	5.23458	0.706739	1	FALSE	-0.112267	5.23467	0.75424	1	FALSE
1	147825322	147825373	RP6-74O6.6	ENSG00000272824	5000	147830374	147830815	-	768	302	TRUE	0.746948	4.9174	4.77556e-05	0.542791	FALSE	0.507405	4.9174	0.000680796	1	FALSE	-0.321168	4.9174	0.0448698	1	FALSE	-0.374371	4.9174	0.0515792	1	FALSE	-0.691629	4.9174	0.0523181	1	FALSE	-0.254893	4.9174	0.156754	1	FALSE	-0.341671	4.91742	0.125647	1	FALSE
1	147932434	147933565	RP11-495P10.2	ENSG00000215863	-500	147835127	147931933	-	768	747	TRUE	0.248232	9.8136	0.0542601	1	FALSE	-0.158172	9.8136	0.128105	1	FALSE	-1.2884	9.8136	7.13364e-39	9.59261e-35	TRUE	1.04106	9.8136	2.77614e-26	3.71393e-22	TRUE	-0.849472	9.8136	3.99639e-05	0.474132	FALSE	0.20767	9.8136	0.0656569	1	FALSE	0.00109935	9.8136	0.97762	1	FALSE
1	147993228	147993645	RNVU1-13	ENSG00000212456	-500	147994146	147994313	+	768	83	TRUE	0.651263	4.79215	0.000650968	1	FALSE	-0.464377	4.79221	0.00392279	1	FALSE	-0.390828	4.79217	0.0250942	1	FALSE	-0.456236	4.79219	0.011083	1	FALSE	-0.342531	4.79218	0.170991	1	FALSE	0.674918	4.79222	2.83665e-05	0.306075	FALSE	0.346051	4.79202	0.118517	1	FALSE
1	148175809	148177819	RP11-289I10.2	ENSG00000223612	-15352	148193172	148193875	+	768	756	TRUE	0.256223	10.8746	0.0287956	1	FALSE	-0.0859332	10.8746	0.363071	1	FALSE	-1.13402	10.8746	6.10003e-37	8.20026e-33	TRUE	0.929714	10.8746	6.86453e-25	9.1717e-21	TRUE	-0.671373	10.8746	0.000285031	1	FALSE	0.138995	10.8746	0.17613	1	FALSE	-0.0172683	10.8746	0.918672	1	FALSE
1	148240523	148240964	RNVU1-14	ENSG00000207501	-500	148241465	148241628	+	768	139	TRUE	0.431475	5.34235	0.0075428	1	FALSE	-0.209034	5.34239	0.157362	1	FALSE	-0.361822	5.34237	0.0091587	1	FALSE	-0.366088	5.34238	0.0158317	1	FALSE	0.231061	5.34238	0.420482	1	FALSE	0.419786	5.3424	0.0047413	1	FALSE	0.236425	5.34224	0.193991	1	FALSE
1	148526604	148527975	RP11-666A1.4	ENSG00000229002	-14897	148542873	148545128	+	768	1	FALSE	0.744859	4.25508	0.00368568	1	FALSE	0.269312	4.25508	0.259347	1	FALSE	-0.312361	4.25508	0.154279	1	FALSE	-0.429518	4.25508	0.117799	1	FALSE	-0.100378	4.25508	0.876103	1	FALSE	-0.238056	4.25508	0.387478	1	FALSE	0.0472372	4.25508	0.776423	1	FALSE
1	148531987	148532699	RP11-666A1.4	ENSG00000229002	-10173	148542873	148545128	+	768	1	FALSE	0.670516	4.19333	0.0129482	1	FALSE	-0.354903	4.19334	0.155078	1	FALSE	-0.242331	4.19333	0.329565	1	FALSE	-0.176648	4.19334	0.505474	1	FALSE	-0.252632	4.19334	0.850013	1	FALSE	0.188522	4.19334	0.659937	1	FALSE	0.275796	4.19329	0.41326	1	FALSE
1	148555477	148555478	NBPF15	ENSG00000243452	-500	148555979	148593723	+	768	33	FALSE	0.14468	4.16213	0.819945	1	FALSE	-0.29883	4.16214	0.206478	1	FALSE	0.285327	4.16213	0.201559	1	FALSE	0.174147	4.16214	0.412012	1	FALSE	-0.431979	4.16214	0.607244	1	FALSE	-0.231727	4.16214	0.264664	1	FALSE	-0.0329279	4.16211	1	1	FALSE
1	148605573	148606010	RNVU1-15	ENSG00000207205	-500	148604908	148605072	-	768	59	TRUE	0.822514	4.66408	7.32044e-06	0.0862567	FALSE	-0.652537	4.66411	0.000124282	1	FALSE	-0.378314	4.66409	0.0364925	1	FALSE	-0.0403818	4.6641	0.80528	1	FALSE	0.249446	4.6641	0.519321	1	FALSE	0.173626	4.66412	0.294531	1	FALSE	0.249176	4.66399	0.224035	1	FALSE
1	148767603	148768077	RNVU1-16	ENSG00000206968	-500	148766938	148767102	-	768	80	TRUE	0.84403	4.70008	2.82934e-07	0.00346453	TRUE	-0.512678	4.70013	0.00126538	1	FALSE	-0.360762	4.7001	0.0140499	1	FALSE	-0.192825	4.70011	0.303659	1	FALSE	0.234329	4.70011	0.344383	1	FALSE	0.162478	4.70014	0.365479	1	FALSE	0.241099	4.69994	0.236272	1	FALSE
1	149204284	149205445	RNU1-92P	ENSG00000252826	9720	149215166	149215300	-	768	0	FALSE	1.50574	4.17949	7.98318e-14	1.04867e-09	FALSE	-0.666788	4.1795	0.0020779	1	FALSE	-0.32362	4.17949	0.108902	1	FALSE	-0.327043	4.1795	0.168617	1	FALSE	-0.0762198	4.1795	1	1	FALSE	-0.198913	4.1795	0.642878	1	FALSE	-0.113596	4.17946	0.761683	1	FALSE
1	149215801	149216390	RNU1-92P	ENSG00000252826	-500	149215166	149215300	-	768	83	TRUE	1.72915	4.95811	1.52904e-25	2.04723e-21	TRUE	-1.26456	4.95831	4.02295e-11	5.09788e-07	TRUE	-0.363516	4.95818	0.0427682	1	FALSE	-0.212007	4.95825	0.291393	1	FALSE	0.962969	4.95823	0.000321153	1	FALSE	-0.506283	4.95834	0.0103033	1	FALSE	-0.53889	4.95761	0.0504211	1	FALSE
1	149224722	149225656	RNVU1-18	ENSG00000206737	-500	149224058	149224221	-	768	628	TRUE	1.67489	7.82814	3.68225e-51	4.94895e-47	TRUE	-1.2423	7.82817	2.38186e-27	3.19074e-23	TRUE	-0.214258	7.82815	0.0524989	1	FALSE	-0.076948	7.82816	0.554013	1	FALSE	0.356898	7.82816	0.0662112	1	FALSE	-0.409416	7.82817	0.00166246	1	FALSE	-0.229546	7.82807	0.196165	1	FALSE
1	149272378	149273219	RP11-403I13.10	ENSG00000270962	-5796	149279016	149279311	+	768	680	TRUE	0.212644	7.29848	0.0846438	1	FALSE	0.241205	7.29851	0.0108568	1	FALSE	-0.328264	7.29849	0.00068019	1	FALSE	0.47804	7.2985	2.0339e-06	0.0239634	FALSE	-0.0130658	7.2985	1	1	FALSE	-0.593602	7.29852	1.61844e-07	0.00188176	FALSE	-0.21709	7.29839	0.125183	1	FALSE
1	149297100	149299706	RP11-403I13.8	ENSG00000235999	5356	149287451	149291743	+	768	40	TRUE	0.894896	6.09074	9.54487e-11	1.23043e-06	TRUE	-0.192242	6.09081	0.124253	1	FALSE	-0.827224	6.09076	9.42102e-12	1.22445e-07	TRUE	0.0981129	6.09079	0.427046	1	FALSE	0.283645	6.09078	0.169333	1	FALSE	0.19652	6.09082	0.137756	1	FALSE	-0.178246	6.09054	0.306276	1	FALSE
1	149514757	149515155	RNVU1-19	ENSG00000212544	-500	149514090	149514256	-	768	120	TRUE	0.517767	4.64663	0.0154008	1	FALSE	-0.226282	4.64665	0.221947	1	FALSE	-0.300458	4.64664	0.113985	1	FALSE	-0.424172	4.64665	0.0315566	1	FALSE	-0.233484	4.64664	0.446021	1	FALSE	0.240789	4.64666	0.211912	1	FALSE	0.672358	4.64658	0.00542625	1	FALSE
1	149532823	149533316	RP11-277L2.6	ENSG00000271594	7749	149524787	149525073	+	768	1	FALSE	0.151511	4.15963	0.711977	1	FALSE	-0.328307	4.15963	0.194602	1	FALSE	-0.272397	4.15963	0.265421	1	FALSE	-0.00349972	4.15963	0.897142	1	FALSE	1.79996	4.15963	7.51549e-08	0.000947102	FALSE	-0.523018	4.15964	0.0942127	1	FALSE	-0.366028	4.15961	0.315942	1	FALSE
1	149833215	149834416	HIST2H4B	ENSG00000182217	-500	149830749	149832714	-	768	735	TRUE	0.0866146	9.49923	0.491852	1	FALSE	-0.121164	9.49924	0.239449	1	FALSE	0.163553	9.49923	0.0852038	1	FALSE	0.766571	9.49923	2.41321e-14	3.15599e-10	TRUE	-0.125739	9.49923	0.524423	1	FALSE	-1.48798	9.49924	5.56519e-37	7.41227e-33	TRUE	-0.0392895	9.4992	0.814391	1	FALSE
1	149983126	149983376	OTUD7B	ENSG00000163113	-500	149909705	149982625	-	768	4	FALSE	0.625239	4.14584	0.00334484	1	FALSE	-0.505436	4.14585	0.01177	1	FALSE	0.107587	4.14584	0.536636	1	FALSE	-0.309077	4.14584	0.202109	1	FALSE	0.556346	4.14584	0.15697	1	FALSE	-0.247687	4.14585	0.252075	1	FALSE	0.115416	4.14582	0.987235	1	FALSE
1	150038504	150038868	VPS45	ENSG00000136631	-500	150039369	150117505	+	768	216	TRUE	0.208382	5.43162	0.181649	1	FALSE	-0.352083	5.4317	0.0165814	1	FALSE	0.819378	5.43165	1.35229e-13	1.77705e-09	TRUE	0.161038	5.43167	0.227848	1	FALSE	0.315884	5.43166	0.165922	1	FALSE	-2.01228	5.43171	1.24426e-32	1.65163e-28	TRUE	-0.305036	5.43141	0.121927	1	FALSE
1	150265310	150265788	MRPS21	ENSG00000187145	-500	150266289	150281414	+	768	46	TRUE	0.29812	4.62133	0.140153	1	FALSE	-0.686262	4.62144	0.000794561	1	FALSE	0.126411	4.62137	0.420644	1	FALSE	0.157718	4.62141	0.355975	1	FALSE	1.72289	4.62139	7.58388e-14	9.94551e-10	TRUE	-1.25939	4.62145	1.13169e-08	0.000135089	TRUE	-0.356904	4.62108	0.199974	1	FALSE
1	150293313	150293424	PRPF3	ENSG00000117360	-500	150293925	150325671	+	768	42	TRUE	1.16084	4.26522	1.01234e-06	0.0122352	FALSE	-0.688459	4.26531	0.0106378	1	FALSE	-0.634614	4.26525	0.0097669	1	FALSE	-0.0606083	4.26528	0.767361	1	FALSE	1.26914	4.26527	6.05666e-05	0.712748	FALSE	-0.388198	4.26532	0.156266	1	FALSE	-0.379772	4.26502	0.295626	1	FALSE
1	150335016	150335066	RPRD2	ENSG00000163125	-500	150335567	150446032	+	768	194	TRUE	-0.259987	4.52223	0.227063	1	FALSE	0.21104	4.52227	0.194377	1	FALSE	0.017135	4.52225	0.706859	1	FALSE	0.0192684	4.52226	0.702538	1	FALSE	-0.381974	4.52225	0.0682184	1	FALSE	0.0997275	4.52227	0.609687	1	FALSE	-0.151962	4.52215	0.343977	1	FALSE
1	150459064	150459386	TARS2	ENSG00000143374	-500	150459887	150471711	+	768	59	TRUE	0.510415	4.82269	0.00755334	1	FALSE	-0.279934	4.82271	0.0978867	1	FALSE	0.728364	4.8227	2.96831e-07	0.00364033	TRUE	-1.39563	4.82271	3.46821e-12	4.47815e-08	TRUE	0.142573	4.82271	0.483913	1	FALSE	-0.173051	4.82272	0.312678	1	FALSE	-0.15296	4.82264	0.558376	1	FALSE
1	150552567	150553363	MCL1	ENSG00000143384	-500	150547032	150552066	-	768	679	TRUE	0.558871	7.86799	2.22055e-07	0.00272528	FALSE	-0.518993	7.86803	1.11368e-08	0.000135491	FALSE	-0.33082	7.868	0.000168353	1	FALSE	-0.18748	7.86802	0.0651528	1	FALSE	0.95929	7.86801	2.44005e-11	3.1667e-07	TRUE	0.106578	7.86803	0.293	1	FALSE	0.1974	7.86789	0.123452	1	FALSE
1	150602589	150603247	ENSA	ENSG00000143420	-500	150597676	150602088	-	768	753	TRUE	-0.0778126	8.14602	0.427051	1	FALSE	0.0938395	8.14604	0.197211	1	FALSE	0.533325	8.14602	1.61273e-15	2.13412e-11	FALSE	-0.330954	8.14603	8.10565e-05	0.88765	FALSE	-0.0508042	8.14603	0.740403	1	FALSE	-0.481677	8.14604	2.221e-08	0.000263477	FALSE	-0.177055	8.14596	0.118311	1	FALSE
1	150738934	150738945	CTSS	ENSG00000163131	-500	150702672	150738433	-	768	89	TRUE	0.164226	4.33836	0.444657	1	FALSE	0.164297	4.33838	0.31698	1	FALSE	0.0813434	4.33836	0.777004	1	FALSE	-1.01556	4.33837	4.4018e-06	0.0512325	FALSE	0.386631	4.33837	0.216681	1	FALSE	0.275435	4.33838	0.205218	1	FALSE	-0.0822176	4.3383	0.575891	1	FALSE
1	150742742	150744214	CTSS	ENSG00000163131	-4308	150702672	150738433	-	768	17	FALSE	-0.144144	5.56651	0.351557	1	FALSE	0.124553	5.56654	0.257395	1	FALSE	0.202302	5.56652	0.0371447	1	FALSE	-0.826541	5.56653	1.234e-10	1.5694e-06	FALSE	0.488591	5.56653	0.00676356	1	FALSE	0.109082	5.56654	0.48825	1	FALSE	0.0913249	5.56646	0.621331	1	FALSE
1	150862552	150863237	Y_RNA	ENSG00000212512	-7540	150854927	150855011	-	768	0	FALSE	0.506276	4.18613	0.0476712	1	FALSE	-0.198321	4.18614	0.314577	1	FALSE	-0.00792551	4.18613	1	1	FALSE	-0.271319	4.18614	0.341912	1	FALSE	-0.241571	4.18613	1	1	FALSE	-0.249901	4.18614	0.271711	1	FALSE	0.578777	4.18612	0.029827	1	FALSE
1	150897563	150898238	SETDB1	ENSG00000143379	-500	150898739	150913847	+	768	26	FALSE	-0.0444128	4.50121	0.954886	1	FALSE	-0.84899	4.50125	4.68784e-05	0.501083	FALSE	0.122788	4.50122	0.534974	1	FALSE	-0.132984	4.50124	0.455396	1	FALSE	0.717656	4.50123	0.0249048	1	FALSE	0.467799	4.50125	0.0164345	1	FALSE	0.043173	4.50111	0.764931	1	FALSE
1	151119605	151119904	SEMA6C	ENSG00000143434	-500	151104161	151119104	-	768	111	TRUE	0.958517	5.19352	2.32508e-08	0.000290566	TRUE	-0.748236	5.19361	2.06223e-06	0.0235074	FALSE	0.392151	5.19355	0.00414498	1	FALSE	-0.320464	5.19358	0.0658277	1	FALSE	0.361801	5.19357	0.132261	1	FALSE	-0.24034	5.19362	0.18597	1	FALSE	-0.68051	5.19331	0.00554085	1	FALSE
1	151432442	151432739	POGZ	ENSG00000143442	-500	151375200	151431941	-	768	82	TRUE	0.756474	4.53767	4.46654e-06	0.0530491	FALSE	-0.422571	4.53775	0.00797623	1	FALSE	-0.445284	4.5377	0.00697148	1	FALSE	-0.023202	4.53772	0.863477	1	FALSE	0.680804	4.53772	0.00443613	1	FALSE	0.0601349	4.53776	0.910379	1	FALSE	-0.165263	4.53749	0.529223	1	FALSE
1	151444952	151448364	POGZ	ENSG00000143442	-13010	151375200	151431941	-	768	8	FALSE	0.610877	5.19241	0.000314701	1	FALSE	-0.269705	5.19255	0.0819397	1	FALSE	0.0938223	5.19246	0.390411	1	FALSE	-0.794503	5.1925	5.46377e-06	0.0634016	FALSE	1.36553	5.19249	4.28302e-11	5.54994e-07	FALSE	-0.522047	5.19256	0.00152333	1	FALSE	-0.0857673	5.19207	0.659609	1	FALSE
1	151450286	151451970	POGZ	ENSG00000143442	-18344	151375200	151431941	-	768	7	FALSE	0.600926	4.80723	0.00163175	1	FALSE	-0.450716	4.8073	0.00648309	1	FALSE	-0.0483129	4.80725	0.975244	1	FALSE	-0.506439	4.80728	0.0102559	1	FALSE	1.67824	4.80727	6.4562e-15	8.48926e-11	FALSE	-0.775909	4.80731	0.000243525	1	FALSE	-0.0289806	4.80707	0.906717	1	FALSE
1	151462574	151463373	CGN	ENSG00000143375	-19612	151482986	151491505	+	768	0	FALSE	0.269593	4.28044	0.377245	1	FALSE	-0.36445	4.28046	0.114148	1	FALSE	-0.191401	4.28044	0.33207	1	FALSE	-0.355352	4.28045	0.143995	1	FALSE	1.20935	4.28045	1.59198e-05	0.191452	FALSE	-0.0400192	4.28046	0.900755	1	FALSE	0.187552	4.28039	0.500835	1	FALSE
1	151882785	151882788	THEM4	ENSG00000159445	-500	151846060	151882284	-	768	113	TRUE	1.2304	4.38017	2.1869e-08	0.000273406	TRUE	-1.00354	4.3803	4.94949e-05	0.528408	FALSE	-0.119134	4.38021	0.723807	1	FALSE	-0.345709	4.38026	0.119361	1	FALSE	1.25569	4.38024	3.6328e-05	0.431577	FALSE	-0.488857	4.38032	0.0494624	1	FALSE	-0.377104	4.37984	0.267265	1	FALSE
1	151891450	151893323	THEM4	ENSG00000159445	-9165	151846060	151882284	-	768	21	FALSE	-0.11865	4.98248	0.537184	1	FALSE	0.462695	4.98256	0.00332276	1	FALSE	-0.0500416	4.98251	0.81602	1	FALSE	-0.32201	4.98254	0.112979	1	FALSE	-0.677484	4.98253	0.0487899	1	FALSE	-0.214647	4.98257	0.279474	1	FALSE	0.36551	4.98228	0.135912	1	FALSE
1	151897278	151900227	THEM4	ENSG00000159445	-14993	151846060	151882284	-	768	0	FALSE	1.00491	4.5068	8.27663e-07	0.0100205	FALSE	-0.404383	4.50688	0.0450958	1	FALSE	-0.63638	4.50683	0.000773556	1	FALSE	-0.548853	4.50686	0.016056	1	FALSE	0.0469954	4.50685	1	1	FALSE	0.759272	4.50689	2.77524e-05	0.299615	FALSE	-0.441444	4.50659	0.147518	1	FALSE
1	151913525	151914756	KRT8P28	ENSG00000223810	7242	151921999	151923388	-	768	1	FALSE	0.65553	4.3072	0.00899148	1	FALSE	-1.18543	4.30725	7.53477e-08	0.000898935	FALSE	-0.622259	4.30722	0.00323028	1	FALSE	0.131393	4.30724	0.460105	1	FALSE	0.00312598	4.30723	1	1	FALSE	0.813657	4.30726	0.000133192	1	FALSE	0.262389	4.30708	0.514396	1	FALSE
1	151916746	151916998	KRT8P28	ENSG00000223810	5000	151921999	151923388	-	768	44	TRUE	0.38582	4.37544	0.121904	1	FALSE	-1.34451	4.37547	4.38955e-10	5.47904e-06	TRUE	-0.155194	4.37545	0.456528	1	FALSE	0.220975	4.37546	0.185111	1	FALSE	0.381889	4.37545	0.238949	1	FALSE	0.52501	4.37547	0.0145418	1	FALSE	0.196525	4.37536	0.489158	1	FALSE
1	151945282	151945912	S100A10	ENSG00000197747	9478	151955391	151966866	-	768	19	FALSE	0.0791418	4.51236	0.812972	1	FALSE	-0.596351	4.51236	0.00830908	1	FALSE	-0.605836	4.51236	0.00737319	1	FALSE	-1.29625	4.51236	9.96711e-07	0.0118628	FALSE	0.528707	4.51236	0.146343	1	FALSE	1.67409	4.51236	1.41679e-16	1.81293e-12	FALSE	-0.452529	4.51234	0.258983	1	FALSE
1	152020884	152021665	S100A11	ENSG00000163191	-500	152004982	152020383	-	768	274	TRUE	0.563408	5.71922	0.00044647	1	FALSE	-1.55474	5.71928	1.23661e-27	1.65681e-23	TRUE	-0.427073	5.71924	0.00162506	1	FALSE	-0.091206	5.71926	0.573961	1	FALSE	0.731305	5.71926	0.000951976	1	FALSE	0.353266	5.71929	0.0176876	1	FALSE	1.05173	5.71905	7.08451e-10	9.47908e-06	TRUE
1	152432242	152433031	RP1-91G5.3	ENSG00000227415	14309	152346430	152417932	+	768	0	FALSE	0.2087	4.12578	0.600755	1	FALSE	0.1752	4.12577	0.0842968	1	FALSE	-0.0214255	4.12578	1	1	FALSE	-0.171433	4.12577	0.340441	1	FALSE	-0.151821	4.12578	1	1	FALSE	-0.0480618	4.12577	1	1	FALSE	-0.155139	4.12579	0.852402	1	FALSE
1	152940741	152941684	SPRR4	ENSG00000184148	-1457	152943142	152945050	+	768	0	FALSE	0.948125	4.18534	9.0865e-05	1	FALSE	-0.288623	4.18535	0.227389	1	FALSE	0.27862	4.18535	0.216645	1	FALSE	-0.615262	4.18535	0.0209778	1	FALSE	-0.893053	4.18535	0.0701004	1	FALSE	-0.309079	4.18535	0.294235	1	FALSE	0.159539	4.18533	0.736309	1	FALSE
1	153540867	153541853	S100A2	ENSG00000196754	-500	153533816	153540366	-	768	9	FALSE	0.821528	4.37261	0.00598232	1	FALSE	-1.78407	4.37264	7.28729e-11	9.20749e-07	FALSE	0.109895	4.37262	0.644241	1	FALSE	-1.72624	4.37263	5.88621e-09	7.33716e-05	FALSE	-0.830128	4.37263	0.227704	1	FALSE	1.76649	4.37264	4.37332e-14	5.51826e-10	FALSE	-1.33579	4.37255	0.00194295	1	FALSE
1	153570714	153571716	S100A16	ENSG00000188643	7645	153579362	153581813	-	768	0	FALSE	0.451028	4.31365	0.0694404	1	FALSE	0.0323179	4.31368	1	1	FALSE	-0.0990768	4.31366	0.743963	1	FALSE	-0.393592	4.31367	0.209227	1	FALSE	0.161526	4.31367	0.75877	1	FALSE	0.0951587	4.31368	0.669327	1	FALSE	-0.149865	4.31356	0.58175	1	FALSE
1	153644025	153645096	ILF2	ENSG00000143621	-500	153634512	153643524	-	768	19	FALSE	0.234397	4.96742	0.210685	1	FALSE	-0.563972	4.96745	2.88122e-05	0.311864	FALSE	0.0538972	4.96743	0.643642	1	FALSE	0.0258622	4.96744	0.765578	1	FALSE	-0.277909	4.96744	0.291401	1	FALSE	0.522534	4.96746	9.43044e-05	0.989442	FALSE	-0.298891	4.96733	0.160537	1	FALSE
1	153699857	153700042	INTS3	ENSG00000143624	-500	153700543	153746555	+	768	36	FALSE	1.19766	4.34787	7.0256e-08	0.000871807	FALSE	-1.10877	4.34797	5.50979e-06	0.0618033	FALSE	-0.370043	4.34791	0.106889	1	FALSE	-0.0945888	4.34794	0.724939	1	FALSE	1.23322	4.34793	4.47257e-05	0.529642	FALSE	-0.309435	4.34799	0.17784	1	FALSE	-0.308451	4.34762	0.508794	1	FALSE
1	153761670	153765386	RP11-216N14.5	ENSG00000231827	-2262	153767649	153774567	+	768	93	TRUE	0.531778	6.52249	0.000218218	1	FALSE	-0.223588	6.52252	0.0710749	1	FALSE	0.483056	6.5225	8.91819e-06	0.104191	FALSE	-0.481981	6.52251	0.000380246	1	FALSE	-0.664215	6.52251	0.00425158	1	FALSE	-0.0604225	6.52252	0.656868	1	FALSE	-0.367833	6.52243	0.0425207	1	FALSE
1	153895952	153896944	GATAD2B	ENSG00000143614	-500	153777201	153895451	-	768	604	TRUE	0.211648	7.3654	0.0871979	1	FALSE	-0.87543	7.36544	9.3837e-19	1.24259e-14	TRUE	0.0750736	7.36541	0.408914	1	FALSE	-0.230546	7.36543	0.0377684	1	FALSE	0.345068	7.36542	0.0434281	1	FALSE	0.846551	7.36544	9.35602e-18	1.20449e-13	TRUE	-0.572415	7.36531	0.000181791	1	FALSE
1	153959335	153960130	RAB13	ENSG00000143545	-500	153954537	153958834	-	768	176	TRUE	0.0849657	5.87754	0.733423	1	FALSE	-1.41182	5.87756	1.75164e-14	2.27818e-10	TRUE	-0.950858	5.87755	5.77113e-08	0.00071816	TRUE	-0.953526	5.87755	3.94407e-06	0.0459761	FALSE	-0.708305	5.87755	0.052626	1	FALSE	2.34026	5.87756	3.28686e-61	4.40801e-57	TRUE	-0.549214	5.87749	0.0437037	1	FALSE
1	154338256	154339438	RP11-350G8.4	ENSG00000237920	10003	154349442	154351749	-	768	5	FALSE	1.41208	4.53861	8.61674e-11	1.11147e-06	FALSE	-0.915929	4.53869	5.09463e-05	0.543495	FALSE	0.614946	4.53864	0.000951938	1	FALSE	-1.38375	4.53867	1.69067e-07	0.00205011	FALSE	-0.0901467	4.53866	0.962495	1	FALSE	-0.0990645	4.5387	0.808268	1	FALSE	-1.10684	4.53843	0.00212136	1	FALSE
1	154357391	154360268	RP11-350G8.4	ENSG00000237920	-5641	154349442	154351749	-	768	87	TRUE	0.825382	6.5091	1.39073e-05	0.162103	FALSE	-0.830997	6.5092	1.08358e-06	0.0124828	FALSE	0.879387	6.50914	7.63891e-10	9.77017e-06	TRUE	-1.62592	6.50917	1.44649e-16	1.90605e-12	TRUE	0.907086	6.50916	0.000515343	1	FALSE	-0.179179	6.50921	0.330188	1	FALSE	-0.924665	6.50887	0.000441264	1	FALSE
1	154369720	154369803	RP11-350G8.5	ENSG00000228013	5000	154374804	154379040	-	768	52	TRUE	0.240952	4.28647	0.43152	1	FALSE	-0.710012	4.2865	0.00244735	1	FALSE	0.171396	4.28648	0.347444	1	FALSE	-1.04417	4.28649	0.000126527	1	FALSE	0.436479	4.28649	0.231693	1	FALSE	1.01389	4.28651	3.58526e-06	0.0400294	FALSE	-0.664653	4.28637	0.0441718	1	FALSE
1	154600976	154601073	ADAR	ENSG00000160710	-500	154574572	154600475	-	768	178	TRUE	0.739731	4.64155	1.37373e-06	0.0165562	FALSE	-0.11099	4.64162	0.489514	1	FALSE	0.26561	4.64158	0.0317522	1	FALSE	-0.559799	4.6416	0.000932563	1	FALSE	0.0659467	4.64159	0.995369	1	FALSE	-0.505656	4.64163	0.00409814	1	FALSE	-0.0559207	4.64138	0.743064	1	FALSE
1	154843257	154843274	KCNN3	ENSG00000143603	-500	154669931	154842756	-	768	71	TRUE	0.286497	4.20848	0.173458	1	FALSE	-0.179177	4.20849	0.387871	1	FALSE	-0.141564	4.20848	0.814956	1	FALSE	-0.170722	4.20849	0.632848	1	FALSE	0.420301	4.20849	0.211069	1	FALSE	0.200047	4.20849	0.739927	1	FALSE	-0.138367	4.20845	0.681188	1	FALSE
1	154858703	154859652	KCNN3	ENSG00000143603	-15946	154669931	154842756	-	768	8	FALSE	0.427784	4.55499	0.0503093	1	FALSE	-0.660069	4.55501	0.000168619	1	FALSE	-0.296706	4.555	0.0886903	1	FALSE	-0.0981054	4.55501	0.82469	1	FALSE	1.61057	4.555	2.83998e-12	3.70106e-08	FALSE	0.0828554	4.55502	0.623126	1	FALSE	-0.576637	4.55494	0.0334765	1	FALSE
1	154971792	154974626	ZBTB7B	ENSG00000160685	-500	154975127	154989244	+	768	768	TRUE	0.711121	11.1873	3.92694e-09	4.97072e-05	TRUE	-0.612442	11.1873	2.88397e-09	3.55363e-05	FALSE	0.250116	11.1873	0.00879559	1	FALSE	-0.79248	11.1873	7.91608e-12	1.01888e-07	TRUE	1.5275	11.1873	1.99408e-24	2.65512e-20	TRUE	-0.211795	11.1873	0.0697792	1	FALSE	-0.719483	11.1873	6.5381e-06	0.0867149	FALSE
1	155197715	155198130	GBAP1	ENSG00000160766	-500	155183939	155197214	-	768	156	TRUE	0.886223	5.47956	1.25466e-08	0.00015746	TRUE	-1.38562	5.47976	8.82439e-20	1.17206e-15	TRUE	0.0309071	5.47963	0.748073	1	FALSE	0.295335	5.47969	0.0398765	1	FALSE	0.706321	5.47967	0.00166167	1	FALSE	-0.138807	5.47978	0.458839	1	FALSE	-0.366367	5.47908	0.0886362	1	FALSE
1	155277653	155278038	FDPS	ENSG00000160752	-500	155278539	155290457	+	768	751	TRUE	-0.944752	9.56993	3.30508e-05	0.378696	FALSE	-1.65325	9.56992	8.26354e-22	1.10103e-17	TRUE	-1.17524	9.56993	9.00759e-13	1.17855e-08	TRUE	-0.518659	9.56992	0.00517779	1	FALSE	-0.818014	9.56992	0.0133869	1	FALSE	2.62629	9.56992	3.95905e-94	5.32333e-90	TRUE	-0.298439	9.56996	0.242007	1	FALSE
1	155904692	155904976	KIAA0907	ENSG00000132680	-500	155902064	155904191	-	768	272	TRUE	0.69731	5.55105	1.48813e-05	0.173248	FALSE	-1.05311	5.55121	3.47693e-12	4.44804e-08	TRUE	-0.222973	5.55111	0.10357	1	FALSE	0.0348729	5.55116	0.836234	1	FALSE	0.717475	5.55114	0.00156638	1	FALSE	0.557027	5.55123	0.000101487	1	FALSE	-0.693229	5.55065	0.00187657	1	FALSE
1	155909616	155910979	RXFP4	ENSG00000173080	-500	155911480	155912625	+	768	367	TRUE	0.35956	6.79911	0.0077398	1	FALSE	-0.652214	6.79914	4.92941e-09	6.04592e-05	FALSE	0.0628699	6.79912	0.532665	1	FALSE	0.350389	6.79913	0.00212071	1	FALSE	0.104418	6.79913	0.562158	1	FALSE	0.116258	6.79915	0.326097	1	FALSE	-0.425457	6.79901	0.00989425	1	FALSE
1	156115795	156116656	SEMA4A	ENSG00000196189	-500	156117157	156131289	+	768	163	TRUE	0.360849	5.58325	0.0692515	1	FALSE	-0.916102	5.58333	3.00641e-08	0.000362363	TRUE	-0.849441	5.58328	1.47299e-07	0.00181797	TRUE	0.0585513	5.5833	0.689341	1	FALSE	0.378252	5.5833	0.16374	1	FALSE	1.05261	5.58334	4.06655e-11	5.01447e-07	TRUE	0.161017	5.58307	0.472974	1	FALSE
1	156162944	156163379	SLC25A44	ENSG00000160785	-500	156163880	156182587	+	768	421	TRUE	0.0105567	5.84135	0.958969	1	FALSE	-0.321036	5.8414	0.00223274	1	FALSE	0.327873	5.84137	0.000430687	1	FALSE	-0.348653	5.84139	0.00326921	1	FALSE	0.174884	5.84138	0.376177	1	FALSE	0.282719	5.84141	0.0150455	1	FALSE	-0.242627	5.84123	0.153214	1	FALSE
1	156426870	156428205	RP11-98G7.1	ENSG00000236947	-500	156422689	156426369	-	768	371	TRUE	0.474892	6.565	1.51934e-05	0.176775	FALSE	-0.491706	6.56506	5.60172e-08	0.000670806	FALSE	-0.0895118	6.56502	0.364221	1	FALSE	-0.297919	6.56504	0.00374014	1	FALSE	-0.0667054	6.56504	0.662633	1	FALSE	0.518993	6.56507	5.23277e-08	0.000615531	FALSE	0.017241	6.56485	0.927171	1	FALSE
1	156471121	156476225	MEF2D	ENSG00000116604	-500	156433519	156470620	-	768	272	TRUE	0.763713	7.94769	9.86158e-12	1.28141e-07	TRUE	-0.733491	7.94773	3.59489e-14	4.66581e-10	TRUE	-0.026506	7.94771	0.805491	1	FALSE	-0.809372	7.94772	5.72167e-14	7.46621e-10	TRUE	0.440254	7.94772	0.00805156	1	FALSE	0.598	7.94774	2.10504e-09	2.54605e-05	FALSE	-0.0711844	7.94759	0.651387	1	FALSE
1	156477253	156479145	RP11-284F21.8	ENSG00000260460	-500	156479646	156481473	+	768	53	TRUE	1.05381	5.3683	2.96709e-07	0.00363142	TRUE	-0.649738	5.36841	0.000502726	1	FALSE	-0.131903	5.36834	0.456694	1	FALSE	-1.76477	5.36838	8.44554e-15	1.10653e-10	TRUE	-1.09684	5.36836	0.00555765	1	FALSE	1.05813	5.36843	4.97233e-09	5.97327e-05	TRUE	0.0156731	5.36803	0.941165	1	FALSE
1	156571789	156571925	GPATCH4	ENSG00000160818	-500	156567556	156571288	-	768	103	TRUE	0.267392	4.69318	0.207312	1	FALSE	-0.313648	4.69325	0.0650936	1	FALSE	0.385674	4.69321	0.0031372	1	FALSE	0.056068	4.69323	0.678598	1	FALSE	-0.155066	4.69322	0.518279	1	FALSE	-0.257177	4.69326	0.215957	1	FALSE	-0.407817	4.69302	0.0660128	1	FALSE
1	156577823	156578616	RP11-284F21.11	ENSG00000272971	5917	156584534	156585080	-	768	9	FALSE	0.0204013	4.78839	0.780715	1	FALSE	-0.36311	4.78843	0.0158906	1	FALSE	0.439645	4.7884	0.00129534	1	FALSE	-0.0557511	4.78842	0.882704	1	FALSE	-0.50491	4.78841	0.185875	1	FALSE	-0.000174771	4.78843	0.972001	1	FALSE	-0.0477913	4.7883	0.65895	1	FALSE
1	156676109	156676636	CRABP2	ENSG00000143320	-500	156670667	156675608	-	768	741	TRUE	-0.281509	7.95887	0.0433341	1	FALSE	-0.325166	7.95886	0.00153221	1	FALSE	-0.2905	7.95887	0.00398341	1	FALSE	-1.10442	7.95886	6.58686e-21	8.76579e-17	TRUE	-0.430493	7.95886	0.0372754	1	FALSE	1.5952	7.95886	1.70078e-75	2.28381e-71	TRUE	-0.455257	7.95887	0.00401565	1	FALSE
1	157075325	157077093	ETV3L	ENSG00000253831	-5724	157061836	157069600	-	768	1	FALSE	0.407594	4.23405	0.206165	1	FALSE	-0.612491	4.23409	0.00683376	1	FALSE	-0.449774	4.23407	0.0498164	1	FALSE	-0.185462	4.23408	0.457576	1	FALSE	0.495259	4.23407	0.14748	1	FALSE	0.63401	4.2341	0.00348852	1	FALSE	0.136745	4.23396	0.463989	1	FALSE
1	157108767	157109476	ETV3	ENSG00000117036	-500	157102937	157108266	-	768	218	TRUE	0.85774	5.86863	1.43333e-08	0.000179697	TRUE	-1.01192	5.86885	2.0447e-12	2.62212e-08	TRUE	-0.361732	5.86871	0.00756429	1	FALSE	0.0302427	5.86878	0.807984	1	FALSE	1.0541	5.86876	3.03469e-07	0.00379063	TRUE	-0.00640066	5.86888	0.916328	1	FALSE	0.0947774	5.86809	0.625806	1	FALSE
1	157125558	157126341	ETV3	ENSG00000117036	-17291	157102937	157108266	-	768	0	FALSE	-0.176205	4.13271	0.282072	1	FALSE	0.0126249	4.13272	1	1	FALSE	0.093404	4.13272	0.694542	1	FALSE	0.131302	4.13272	0.591626	1	FALSE	-0.285806	4.13272	0.828368	1	FALSE	0.101408	4.13272	0.993282	1	FALSE	-0.291614	4.13271	0.470415	1	FALSE
1	157133472	157134157	RP11-71G12.1	ENSG00000229961	-21020	157155178	157157195	+	768	0	FALSE	-0.0063789	4.12959	1	1	FALSE	-0.0885406	4.12959	0.809295	1	FALSE	0.301297	4.12959	0.0503217	1	FALSE	-0.261761	4.12959	0.16901	1	FALSE	-0.232394	4.12959	0.968849	1	FALSE	0.0667523	4.12959	0.734177	1	FALSE	-0.0567552	4.12959	1	1	FALSE
1	157145543	157148647	RP11-71G12.1	ENSG00000229961	-6530	157155178	157157195	+	768	45	TRUE	-1.14718	5.94505	0.000977315	1	FALSE	-0.323024	5.94512	0.197071	1	FALSE	1.25767	5.94507	2.20004e-09	2.79734e-05	TRUE	-1.41569	5.94509	1.61863e-06	0.0191338	FALSE	0.799189	5.94509	0.039524	1	FALSE	-0.267305	5.94513	0.359132	1	FALSE	-0.234975	5.94488	0.55954	1	FALSE
1	157333409	157334057	RP11-85G21.2	ENSG00000237189	-75565	157257493	157257843	-	768	0	FALSE	0.111359	4.15987	0.702199	1	FALSE	0.018022	4.15987	0.922664	1	FALSE	0.298346	4.15987	0.162173	1	FALSE	-0.253774	4.15987	0.291264	1	FALSE	-0.395197	4.15987	0.676527	1	FALSE	-0.163049	4.15987	0.642999	1	FALSE	0.0048045	4.15986	1	1	FALSE
1	157373008	157374231	FCRL5	ENSG00000143297	108935	157483167	157485863	-	768	21	FALSE	-1.37117	5.13241	0.0125157	1	FALSE	-1.67731	5.13215	2.01681e-05	0.220316	FALSE	2.56924	5.13232	8.40914e-18	1.11959e-13	FALSE	-2.32595	5.13223	4.73453e-07	0.00567197	FALSE	-0.629367	5.13226	0.501775	1	FALSE	-0.425002	5.13211	0.345574	1	FALSE	-0.67331	5.13305	0.275844	1	FALSE
1	157474661	157476667	FCRL5	ENSG00000143297	6499	157483167	157485863	-	768	123	TRUE	0.59478	6.47023	5.39004e-05	0.611014	FALSE	-0.267018	6.4703	0.0341446	1	FALSE	0.490139	6.47025	1.37364e-05	0.159452	FALSE	-0.409972	6.47028	0.00295037	1	FALSE	-0.562871	6.47027	0.0245311	1	FALSE	-0.427072	6.47031	0.00285659	1	FALSE	0.0310496	6.47005	0.835724	1	FALSE
1	157522811	157523767	FCRL5	ENSG00000143297	-500	157483167	157522310	-	768	5	FALSE	0.926129	4.65315	2.58619e-07	0.00317042	FALSE	-0.503389	4.65319	0.00995292	1	FALSE	0.39086	4.65316	0.00869086	1	FALSE	-0.0526818	4.65318	0.707159	1	FALSE	-0.784753	4.65317	0.0247154	1	FALSE	-0.761296	4.6532	0.000143491	1	FALSE	-0.0486196	4.65303	0.891066	1	FALSE
1	157531262	157533972	FCRL5	ENSG00000143297	-8951	157483167	157522310	-	768	4	FALSE	0.739257	4.82538	6.92847e-05	0.780699	FALSE	-0.795388	4.82548	2.72268e-06	0.0308888	FALSE	-0.151389	4.82542	0.443536	1	FALSE	0.659161	4.82545	3.25446e-05	0.364955	FALSE	-1.84805	4.82544	9.99966e-07	0.0123776	FALSE	-0.217347	4.8255	0.267	1	FALSE	0.215554	4.82512	0.364406	1	FALSE
1	157568371	157568666	FCRL4	ENSG00000163518	-500	157543539	157567870	-	768	8	FALSE	-0.0256328	4.12575	1	1	FALSE	-0.17672	4.12574	0.185079	1	FALSE	-0.0233659	4.12575	1	1	FALSE	0.0306319	4.12574	1	1	FALSE	-0.151906	4.12574	1	1	FALSE	0.0641975	4.12574	0.82583	1	FALSE	0.362205	4.12575	0.330229	1	FALSE
1	157622572	157623373	RP4-801G22.3	ENSG00000233712	-12480	157606090	157610091	-	768	61	TRUE	0.134895	5.13754	0.584876	1	FALSE	-1.3176	5.13763	1.56305e-08	0.000189598	TRUE	0.506025	5.13757	0.00987125	1	FALSE	0.608023	5.1376	0.00470655	1	FALSE	-0.0517377	5.13759	0.989976	1	FALSE	-0.265671	5.13764	0.322764	1	FALSE	-0.162268	5.13733	0.666387	1	FALSE
1	157671250	157671705	FCRL3	ENSG00000160856	-602	157646272	157670647	-	768	18	FALSE	0.312867	4.79607	0.152107	1	FALSE	-0.568044	4.79609	0.000948182	1	FALSE	-0.348548	4.79608	0.0603953	1	FALSE	0.675026	4.79608	4.91839e-05	0.546319	FALSE	0.580881	4.79608	0.0317576	1	FALSE	0.0697372	4.7961	0.698142	1	FALSE	-0.722836	4.79601	0.00439307	1	FALSE
1	157673237	157678375	RP11-367J7.4	ENSG00000231700	-500	157678876	157679433	+	768	317	TRUE	0.275463	7.85361	0.104792	1	FALSE	-0.188496	7.85363	0.174332	1	FALSE	-0.555032	7.85362	4.50384e-05	0.510286	FALSE	0.404793	7.85362	0.00474085	1	FALSE	0.669676	7.85362	0.00352441	1	FALSE	0.196939	7.85363	0.186585	1	FALSE	-0.596176	7.85358	0.0052594	1	FALSE
1	157695311	157698493	VDAC1P9	ENSG00000232366	-500	157693970	157694810	-	768	591	TRUE	-0.104773	8.91292	0.473955	1	FALSE	-1.20975	8.91293	2.32199e-28	3.11216e-24	TRUE	0.0362122	8.91293	0.712451	1	FALSE	0.0599649	8.91293	0.595628	1	FALSE	-0.161135	8.91293	0.458442	1	FALSE	1.14076	8.91293	1.09009e-27	1.43816e-23	TRUE	-0.494423	8.9129	0.00312366	1	FALSE
1	157702492	157707121	VDAC1P9	ENSG00000232366	-7681	157693970	157694810	-	768	265	TRUE	0.249694	7.20469	0.165534	1	FALSE	-0.233133	7.20471	0.11479	1	FALSE	-0.395252	7.20469	0.00641093	1	FALSE	0.457271	7.2047	0.0026165	1	FALSE	0.760255	7.2047	0.00161627	1	FALSE	-0.109458	7.20471	0.518767	1	FALSE	-0.386898	7.20463	0.0849136	1	FALSE
1	157709315	157709877	FCRL2	ENSG00000132704	5645	157715523	157740100	-	768	208	TRUE	0.393148	5.64764	0.0517898	1	FALSE	-0.536413	5.64765	0.00173609	1	FALSE	-0.426305	5.64764	0.0100732	1	FALSE	0.696542	5.64765	2.97081e-05	0.33383	FALSE	0.508965	5.64765	0.0613952	1	FALSE	-0.0377265	5.64765	0.883973	1	FALSE	-0.426689	5.64761	0.0839039	1	FALSE
1	157747423	157753110	FCRL2	ENSG00000132704	-500	157739140	157746922	-	768	98	TRUE	0.160545	7.21473	0.341623	1	FALSE	0.683187	7.21478	7.7452e-08	0.000923693	FALSE	-0.0319632	7.21475	0.842258	1	FALSE	-0.065436	7.21476	0.673898	1	FALSE	-0.348605	7.21476	0.196095	1	FALSE	-0.87949	7.21479	5.9932e-08	0.000703961	TRUE	-0.354529	7.2146	0.0936769	1	FALSE
1	157931646	157932639	RP11-451O13.1	ENSG00000236957	12784	157895764	157918861	+	768	1	FALSE	-0.643015	4.18979	0.0307533	1	FALSE	0.157791	4.1898	0.668249	1	FALSE	-0.202971	4.18979	0.369284	1	FALSE	-0.446792	4.1898	0.0894135	1	FALSE	-0.651355	4.1898	0.257607	1	FALSE	0.878677	4.1898	0.000188155	1	FALSE	0.0935298	4.18976	0.834431	1	FALSE
1	158084595	158085888	KIRREL	ENSG00000183853	14542	158056470	158070052	+	768	0	FALSE	0.283526	4.35074	0.238945	1	FALSE	-0.759481	4.35077	0.000324315	1	FALSE	-0.369191	4.35075	0.104406	1	FALSE	0.37029	4.35076	0.080608	1	FALSE	-1.24471	4.35076	0.00876445	1	FALSE	0.484572	4.35078	0.0272649	1	FALSE	0.582067	4.35065	0.0505309	1	FALSE
1	158087666	158088482	RP11-404O13.1	ENSG00000231666	13351	158101834	158110420	-	768	1	FALSE	0.32806	4.19528	0.221315	1	FALSE	-0.432826	4.1953	0.0296892	1	FALSE	-0.170248	4.19529	0.44392	1	FALSE	0.319873	4.19529	0.148939	1	FALSE	-0.795995	4.19529	0.166695	1	FALSE	0.0151573	4.1953	1	1	FALSE	0.456989	4.19523	0.0830959	1	FALSE
1	158094756	158096833	RP11-404O13.1	ENSG00000231666	5000	158101834	158110420	-	768	12	FALSE	1.04617	4.8654	2.16014e-07	0.00265243	FALSE	-0.883181	4.86551	6.07085e-06	0.0679511	FALSE	-0.0219685	4.86544	1	1	FALSE	0.19762	4.86547	0.286876	1	FALSE	-1.26812	4.86546	0.000689019	1	FALSE	-0.354962	4.86552	0.0956556	1	FALSE	0.496933	4.86515	0.0546771	1	FALSE
1	158118915	158120385	RP11-404O13.1	ENSG00000231666	-8485	158101834	158110429	-	768	41	TRUE	0.741047	5.36433	3.17188e-05	0.363783	FALSE	-0.601701	5.36446	0.000318725	1	FALSE	0.920033	5.36438	3.95717e-12	5.15817e-08	TRUE	-0.150874	5.36442	0.384625	1	FALSE	-1.7728	5.36441	9.35892e-08	0.00117838	TRUE	-1.0983	5.36448	4.61437e-09	5.54647e-05	TRUE	-0.175662	5.36402	0.446153	1	FALSE
1	158131679	158135005	ELL2P1	ENSG00000227295	10634	158145640	158147545	-	768	312	TRUE	1.65103	9.07236	3.11369e-13	4.07956e-09	TRUE	-0.722397	9.07236	0.000858936	1	FALSE	-0.281015	9.07236	0.176237	1	FALSE	0.692003	9.07236	0.0011658	1	FALSE	-4.50503	9.07236	3.3732e-16	4.44992e-12	TRUE	-1.20729	9.07236	2.63448e-06	0.0295299	FALSE	-0.234889	9.07234	0.489591	1	FALSE
1	158148046	158149236	CD1D	ENSG00000158473	-500	158149737	158154686	+	768	178	TRUE	1.63242	7.02127	2.74706e-13	3.60029e-09	TRUE	-0.938161	7.02131	1.24577e-05	0.137458	FALSE	-0.0540303	7.02128	0.811763	1	FALSE	0.561913	7.0213	0.00812316	1	FALSE	-3.97112	7.02129	8.59811e-14	1.12721e-09	TRUE	-0.98916	7.02132	8.20085e-05	0.864206	FALSE	-0.281515	7.02117	0.390803	1	FALSE
1	158174168	158174316	RP11-404O13.5	ENSG00000176320	-500	158167712	158173667	-	768	8	FALSE	0.13335	4.13024	0.383226	1	FALSE	0.222817	4.13024	0.315141	1	FALSE	-0.202968	4.13024	0.220179	1	FALSE	0.0215336	4.13024	1	1	FALSE	-0.235294	4.13024	0.964304	1	FALSE	-0.0333927	4.13024	1	1	FALSE	-0.0465507	4.13024	1	1	FALSE
1	158280574	158281003	CD1B	ENSG00000158485	16737	158297741	158300815	-	768	1	FALSE	0.413593	4.12758	0.0127981	1	FALSE	-0.11787	4.12758	0.48361	1	FALSE	-0.136718	4.12758	0.402104	1	FALSE	-0.102474	4.12758	0.790824	1	FALSE	-0.180065	4.12758	1	1	FALSE	-0.196901	4.12758	0.270267	1	FALSE	0.488446	4.12759	0.0186887	1	FALSE
1	158966025	158966995	IFI16	ENSG00000163565	-2762	158969758	158984719	+	768	3	FALSE	-0.829705	4.38578	0.0014094	1	FALSE	0.34007	4.38579	0.0452681	1	FALSE	0.44362	4.38578	0.00771554	1	FALSE	-0.733295	4.38579	0.000922977	1	FALSE	0.278482	4.38579	0.63388	1	FALSE	0.127712	4.38579	0.641091	1	FALSE	-0.36921	4.38575	0.324019	1	FALSE
1	158967389	158968851	IFI16	ENSG00000163565	-906	158969758	158984719	+	768	1	FALSE	-0.540733	4.55508	0.0183458	1	FALSE	0.365487	4.55512	0.0400811	1	FALSE	0.611753	4.5551	2.81116e-05	0.321344	FALSE	-1.27343	4.55511	2.28332e-09	2.8626e-05	FALSE	0.435922	4.5551	0.155327	1	FALSE	-0.103698	4.55512	0.684608	1	FALSE	-0.323301	4.555	0.263966	1	FALSE
1	159207789	159210789	CTA-134P22.2	ENSG00000225670	-30025	159171096	159177763	-	768	17	FALSE	1.41624	5.17276	0.000386959	1	FALSE	-1.54358	5.17289	0.000101026	1	FALSE	1.23984	5.17281	8.57016e-05	0.956944	FALSE	-1.86906	5.17285	3.28261e-05	0.368046	FALSE	-1.13765	5.17283	0.19625	1	FALSE	-0.245687	5.17291	0.59099	1	FALSE	-0.881587	5.17245	0.15702	1	FALSE
1	159750037	159750221	DUSP23	ENSG00000158716	-500	159750722	159752333	+	768	26	FALSE	0.326291	4.36412	0.129949	1	FALSE	-0.729874	4.36413	0.000315957	1	FALSE	0.50936	4.36412	0.00131572	1	FALSE	0.500112	4.36413	0.00521829	1	FALSE	0.225335	4.36413	0.560877	1	FALSE	-1.33	4.36413	7.49554e-09	8.97891e-05	FALSE	-0.0656303	4.36409	0.700536	1	FALSE
1	159880660	159882626	AL590560.1	ENSG00000269620	-500	159879884	159880159	-	768	371	TRUE	-0.215881	8.02263	0.335989	1	FALSE	-1.74736	8.02263	6.34538e-24	8.4806e-20	TRUE	-1.62552	8.02263	1.99621e-22	2.67393e-18	TRUE	-0.341445	8.02263	0.0681342	1	FALSE	1.01852	8.02263	0.000115777	1	FALSE	1.98603	8.02263	1.01672e-42	1.35803e-38	TRUE	0.217823	8.02263	0.333376	1	FALSE
1	160069234	160072514	IGSF8	ENSG00000162729	-500	160063500	160068733	-	768	12	FALSE	0.562591	5.24123	0.00068603	1	FALSE	-0.157089	5.24138	0.394669	1	FALSE	-0.235567	5.24129	0.114459	1	FALSE	-0.167905	5.24134	0.277373	1	FALSE	-0.0603004	5.24132	0.716795	1	FALSE	0.177622	5.2414	0.299986	1	FALSE	0.0119349	5.24087	1	1	FALSE
1	160406536	160409159	VANGL2	ENSG00000162738	8067	160370376	160398468	+	768	2	FALSE	-0.113352	4.35524	0.662437	1	FALSE	-0.569516	4.3553	0.00555322	1	FALSE	-0.145429	4.35526	0.646852	1	FALSE	-0.228919	4.35528	0.353124	1	FALSE	0.712962	4.35528	0.026466	1	FALSE	0.773248	4.35531	0.000153682	1	FALSE	-0.330152	4.35511	0.494869	1	FALSE
1	160413128	160413778	VANGL2	ENSG00000162738	14659	160370376	160398468	+	768	19	FALSE	-0.341748	4.49282	0.237182	1	FALSE	-0.938026	4.49287	5.38371e-06	0.0604052	FALSE	-0.329995	4.49284	0.160111	1	FALSE	-0.511692	4.49285	0.0469466	1	FALSE	-1.08657	4.49285	0.0169216	1	FALSE	1.82326	4.49287	5.13463e-26	6.75409e-22	FALSE	-0.433763	4.49272	0.145876	1	FALSE
1	160420968	160421957	VANGL2	ENSG00000162738	22499	160370376	160398468	+	768	2	FALSE	-0.603869	4.1887	0.0301402	1	FALSE	0.0259731	4.18871	1	1	FALSE	0.0780952	4.1887	0.81929	1	FALSE	-0.0942761	4.18871	0.908205	1	FALSE	-0.678629	4.1887	0.246534	1	FALSE	0.739385	4.18871	0.00101911	1	FALSE	-0.588252	4.18868	0.129885	1	FALSE
1	160617586	160618943	SLAMF1	ENSG00000117090	-500	160577890	160617085	-	768	570	TRUE	0.299976	8.19753	0.078731	1	FALSE	0.243138	8.19754	0.0675546	1	FALSE	0.927536	8.19754	2.23894e-14	2.95294e-10	TRUE	-1.14963	8.19754	8.81462e-13	1.14246e-08	TRUE	-1.67228	8.19754	2.04287e-08	0.000259322	TRUE	-0.684885	8.19754	2.64073e-05	0.285358	FALSE	-0.311843	8.19752	0.147843	1	FALSE
1	160625383	160630865	SLAMF1	ENSG00000117090	-8297	160577890	160617085	-	768	606	TRUE	0.60818	9.44266	2.57394e-05	0.296337	FALSE	-0.137971	9.44267	0.253725	1	FALSE	0.687962	9.44267	1.85638e-10	2.3899e-06	FALSE	-0.493623	9.44267	0.000286232	1	FALSE	-1.27967	9.44267	2.69766e-07	0.00337288	TRUE	-0.431791	9.44267	0.00190892	1	FALSE	-0.478543	9.44264	0.0101214	1	FALSE
1	160633549	160636839	SETP9	ENSG00000235101	-3098	160639938	160640769	+	768	514	TRUE	0.518134	8.99692	0.000751477	1	FALSE	-0.0112654	8.99693	0.94261	1	FALSE	0.799228	8.99693	1.24576e-12	1.62895e-08	TRUE	-0.36849	8.99693	0.00987457	1	FALSE	-1.25096	8.99693	2.03911e-06	0.025077	FALSE	-0.98007	8.99693	6.63683e-11	8.17193e-07	TRUE	-0.450275	8.99689	0.0212965	1	FALSE
1	160682142	160685443	CD48	ENSG00000117091	-500	160648536	160681641	-	768	25	FALSE	0.369555	5.75993	0.00539552	1	FALSE	-0.523933	5.75997	3.07516e-06	0.0348077	FALSE	0.387767	5.75994	4.98158e-05	0.563417	FALSE	0.24089	5.75996	0.0262321	1	FALSE	-0.458819	5.75995	0.0219247	1	FALSE	-0.293737	5.75998	0.0173251	1	FALSE	-0.246303	5.75981	0.113454	1	FALSE
1	160694596	160698658	SLAMF7	ENSG00000026751	-10378	160709037	160718158	+	768	38	FALSE	-0.433896	5.85323	0.0215706	1	FALSE	-0.71622	5.8533	2.21912e-07	0.0026139	FALSE	0.320981	5.85326	0.00895346	1	FALSE	0.385774	5.85328	0.00558406	1	FALSE	-1.02296	5.85327	0.000449085	1	FALSE	0.372932	5.85331	0.0126392	1	FALSE	0.078462	5.85307	0.732498	1	FALSE
1	160701523	160704735	SLAMF7	ENSG00000026751	-4301	160709037	160718158	+	768	448	TRUE	0.133255	7.55565	0.31121	1	FALSE	-0.776809	7.55566	3.37342e-13	4.34969e-09	TRUE	0.629386	7.55565	2.54421e-11	3.29805e-07	FALSE	0.108798	7.55565	0.325335	1	FALSE	-0.443209	7.55565	0.0330175	1	FALSE	-0.287938	7.55566	0.0174909	1	FALSE	0.130132	7.55562	0.379536	1	FALSE
1	160707975	160708536	SLAMF7	ENSG00000026751	-500	160709037	160718158	+	768	35	FALSE	0.58681	4.76365	0.00223779	1	FALSE	-0.647857	4.76375	0.000358002	1	FALSE	0.62952	4.76369	1.67901e-05	0.194076	FALSE	0.148707	4.76372	0.396153	1	FALSE	-0.0485087	4.76371	0.961345	1	FALSE	-0.777694	4.76376	0.00012588	1	FALSE	-0.714577	4.76342	0.0158926	1	FALSE
1	160736356	160739039	SLAMF7	ENSG00000026751	11744	160720213	160724611	+	768	402	TRUE	-0.362562	7.85935	0.0153572	1	FALSE	0.23611	7.85937	0.0255603	1	FALSE	0.659796	7.85935	2.87988e-11	3.73059e-07	FALSE	-0.631435	7.85936	4.1822e-07	0.00501613	FALSE	-0.254978	7.85936	0.253607	1	FALSE	-0.311016	7.85937	0.0141719	1	FALSE	-0.241965	7.8593	0.144227	1	FALSE
1	160742996	160744025	SLAMF7	ENSG00000026751	18384	160720213	160724611	+	768	246	TRUE	-1.58672	6.38359	2.40363e-09	3.05141e-05	TRUE	0.265539	6.3836	0.118336	1	FALSE	1.0988	6.38359	1.86466e-12	2.43617e-08	TRUE	-1.40623	6.3836	4.81511e-11	6.15226e-07	TRUE	0.205809	6.3836	0.467152	1	FALSE	-0.434226	6.3836	0.0380966	1	FALSE	0.008379	6.38356	0.95955	1	FALSE
1	160750740	160753107	LY9	ENSG00000122224	-12756	160765864	160798051	+	768	30	FALSE	-0.0657945	5.50274	0.792476	1	FALSE	0.139659	5.50279	0.34079	1	FALSE	0.0980634	5.50276	0.455645	1	FALSE	-1.14469	5.50278	8.23575e-11	1.04973e-06	FALSE	-0.132926	5.50277	0.714011	1	FALSE	0.707904	5.5028	5.28544e-06	0.0586525	FALSE	-0.243344	5.50262	0.245828	1	FALSE
1	160758862	160760870	LY9	ENSG00000122224	-4993	160765864	160798051	+	768	124	TRUE	-0.711282	6.4669	0.000599437	1	FALSE	0.00566342	6.46692	0.975946	1	FALSE	-0.0570661	6.46691	0.701619	1	FALSE	-1.52997	6.46691	1.72653e-18	2.28799e-14	TRUE	-0.596709	6.46691	0.047993	1	FALSE	1.44127	6.46692	1.88828e-25	2.48177e-21	TRUE	-0.272045	6.46687	0.225404	1	FALSE
1	160764071	160765363	LY9	ENSG00000122224	-500	160765864	160798051	+	768	12	FALSE	-0.155053	4.69859	0.512199	1	FALSE	0.180564	4.69865	0.275043	1	FALSE	0.141001	4.69861	0.33442	1	FALSE	-1.19424	4.69863	1.51118e-08	0.000187054	FALSE	-0.779677	4.69863	0.0209751	1	FALSE	0.858264	4.69866	9.20235e-07	0.0104714	FALSE	-0.309999	4.69844	0.243532	1	FALSE
1	160959664	160960000	F11R	ENSG00000158769	5000	160965001	160991138	-	768	621	TRUE	-0.396475	6.8003	0.0113384	1	FALSE	-0.328241	6.80029	0.00412716	1	FALSE	-0.57211	6.8003	6.38619e-07	0.00775475	FALSE	-0.871618	6.80029	5.46917e-11	6.98577e-07	TRUE	-0.180545	6.80029	0.472676	1	FALSE	1.71423	6.80029	8.0256e-70	1.0772e-65	TRUE	-0.515348	6.80033	0.00411305	1	FALSE
1	161102979	161104164	DEDD	ENSG00000158796	-500	161090767	161102478	-	768	706	TRUE	0.351536	7.79926	0.000182314	1	FALSE	-0.508842	7.79929	3.26516e-11	4.14218e-07	FALSE	0.343601	7.79927	7.59986e-07	0.00920571	FALSE	-0.398823	7.79928	2.18355e-06	0.0257004	FALSE	0.642715	7.79928	4.16561e-07	0.00519035	FALSE	-0.0231444	7.7993	0.795033	1	FALSE	-0.17951	7.79918	0.11814	1	FALSE
1	161283293	161283546	SDHC	ENSG00000143252	-500	161284047	161332984	+	768	142	TRUE	0.513456	4.66717	0.00234389	1	FALSE	-0.361685	4.6672	0.0156256	1	FALSE	0.425332	4.66718	0.000425303	1	FALSE	-0.685208	4.66719	3.12723e-05	0.350875	FALSE	0.0625638	4.66718	0.59986	1	FALSE	0.128704	4.6672	0.640419	1	FALSE	-0.388245	4.6671	0.0937726	1	FALSE
1	161359062	161360720	RRM2P2	ENSG00000236484	-9913	161348497	161349148	-	768	717	TRUE	0.238189	8.95217	0.013167	1	FALSE	-0.609645	8.95217	2.89532e-15	3.77955e-11	FALSE	-0.0633472	8.95217	0.395142	1	FALSE	-0.353913	8.95217	3.49992e-05	0.391956	FALSE	0.668567	8.95217	2.05132e-07	0.00256845	FALSE	0.673741	8.95218	7.99483e-18	1.02941e-13	FALSE	-0.326342	8.95215	0.0057726	1	FALSE
1	161368225	161370502	RNU6-481P	ENSG00000206921	-576	161371079	161371185	+	768	750	TRUE	0.13846	8.8555	0.124538	1	FALSE	-0.143429	8.85551	0.0561836	1	FALSE	0.577607	8.8555	1.23651e-19	1.65148e-15	FALSE	-0.196755	8.8555	0.0134669	1	FALSE	0.543028	8.8555	9.9463e-06	0.120271	FALSE	-0.941922	8.85551	7.76662e-32	1.03009e-27	TRUE	-0.171343	8.85547	0.116079	1	FALSE
1	161390454	161392341	RP11-122G18.7	ENSG00000215840	13581	161375858	161376872	+	768	568	TRUE	0.394507	8.26483	0.000971187	1	FALSE	-0.115031	8.26483	0.263668	1	FALSE	0.807202	8.26483	1.76857e-21	2.36758e-17	TRUE	-0.698797	8.26483	1.90938e-10	2.42415e-06	TRUE	0.503051	8.26483	0.00248538	1	FALSE	-1.07014	8.26483	1.97672e-21	2.57744e-17	TRUE	-0.423366	8.26483	0.00488243	1	FALSE
1	161397720	161398368	RP11-122G18.7	ENSG00000215840	20847	161375858	161376872	+	768	239	TRUE	0.343034	5.92962	0.0189465	1	FALSE	0.00438994	5.92968	0.892711	1	FALSE	0.649614	5.92964	2.29505e-09	2.91747e-05	FALSE	-0.405759	5.92966	0.00315245	1	FALSE	-0.0625115	5.92965	0.871065	1	FALSE	-0.788532	5.92968	2.27683e-08	0.000270055	TRUE	-0.436133	5.92947	0.0160902	1	FALSE
1	161409340	161411833	RP11-122G18.7	ENSG00000215840	32467	161375858	161376872	+	768	144	TRUE	-0.711167	6.92224	1.09552e-05	0.128143	FALSE	-0.0189082	6.9223	0.938116	1	FALSE	0.966472	6.92226	2.82092e-22	3.77778e-18	TRUE	-0.613126	6.92228	2.46099e-06	0.0289166	FALSE	0.113893	6.92227	0.561828	1	FALSE	-0.477178	6.92231	0.000303179	1	FALSE	-0.251638	6.92211	0.154067	1	FALSE
1	161416950	161419048	RP11-122G18.7	ENSG00000215840	40077	161375858	161376872	+	768	2	FALSE	0.423218	4.69287	0.0727963	1	FALSE	-0.461935	4.69292	0.0277475	1	FALSE	0.831094	4.69289	1.70944e-06	0.0204876	FALSE	-0.960656	4.6929	7.06024e-05	0.776839	FALSE	-0.0377073	4.6929	0.928091	1	FALSE	-0.260149	4.69293	0.256258	1	FALSE	-0.164473	4.69273	0.636114	1	FALSE
1	161424124	161426034	RP11-122G18.7	ENSG00000215840	47251	161375858	161376872	+	768	26	FALSE	0.188407	4.96943	0.366024	1	FALSE	-0.259835	4.96949	0.163827	1	FALSE	0.800012	4.96945	1.22186e-07	0.0015101	FALSE	-0.733866	4.96947	0.000348545	1	FALSE	-0.451382	4.96947	0.196746	1	FALSE	-0.262855	4.9695	0.18567	1	FALSE	-0.0917295	4.96928	0.766395	1	FALSE
1	161431692	161433568	FCGR2A	ENSG00000143226	-41651	161475220	161488348	+	768	0	FALSE	-0.0184531	4.11675	1	1	FALSE	0.07916	4.11675	0.424479	1	FALSE	-0.0212269	4.11675	1	1	FALSE	-0.0196488	4.11675	1	1	FALSE	-0.0173126	4.11675	1	1	FALSE	-0.0192215	4.11675	1	1	FALSE	-0.0178045	4.11675	1	1	FALSE
1	161438971	161441294	FCGR2A	ENSG00000143226	-33925	161475220	161488348	+	768	5	FALSE	0.274734	4.91795	0.154208	1	FALSE	-0.499254	4.91805	0.00834463	1	FALSE	0.686799	4.91799	7.98544e-06	0.0934775	FALSE	-0.837799	4.91802	4.23257e-05	0.471889	FALSE	0.385913	4.91801	0.187521	1	FALSE	-0.0416958	4.91806	0.718456	1	FALSE	-0.201209	4.91772	0.400095	1	FALSE
1	161674653	161676261	FCRLA	ENSG00000132185	-500	161676762	161684138	+	768	1	FALSE	0.392044	4.66133	0.0438165	1	FALSE	-0.557328	4.66137	0.00136076	1	FALSE	0.00992166	4.66134	0.853496	1	FALSE	0.349042	4.66136	0.0642526	1	FALSE	-0.730736	4.66135	0.0389795	1	FALSE	0.0618711	4.66137	0.718192	1	FALSE	0.0510062	4.66124	0.843822	1	FALSE
1	161689143	161690852	FCRLB	ENSG00000162746	-500	161691353	161697933	+	768	2	FALSE	0.599965	4.53275	0.00333135	1	FALSE	-0.632808	4.53284	0.00155844	1	FALSE	0.146194	4.53278	0.288138	1	FALSE	0.239519	4.53281	0.235568	1	FALSE	-0.429351	4.5328	0.266037	1	FALSE	-0.231078	4.53285	0.276479	1	FALSE	-0.0183902	4.53254	0.858319	1	FALSE
1	161710890	161711478	RN7SL466P	ENSG00000241347	5000	161705598	161705889	+	768	23	FALSE	-0.307569	4.48285	0.42307	1	FALSE	-0.319748	4.48292	0.130665	1	FALSE	-0.505388	4.48288	0.0486254	1	FALSE	1.42847	4.4829	1.70922e-12	2.21071e-08	FALSE	-0.737373	4.48289	0.149252	1	FALSE	-0.374765	4.48293	0.171435	1	FALSE	-0.573538	4.4827	0.0783683	1	FALSE
1	161713394	161714724	DUSP12	ENSG00000081721	-4823	161719548	161727028	+	768	14	FALSE	-0.487338	4.66709	0.102757	1	FALSE	-0.437949	4.66715	0.0285448	1	FALSE	-0.522949	4.66711	0.0117474	1	FALSE	1.32737	4.66713	1.91203e-13	2.4887e-09	FALSE	-1.13378	4.66713	0.00942393	1	FALSE	0.156873	4.66716	0.482124	1	FALSE	-0.503492	4.66694	0.0691214	1	FALSE
1	161718911	161719047	DUSP12	ENSG00000081721	-500	161719548	161727028	+	768	681	TRUE	0.297809	6.78582	0.0390886	1	FALSE	-1.56777	6.78582	1.72456e-38	2.31711e-34	TRUE	0.0868522	6.78582	0.447282	1	FALSE	0.0586899	6.78582	0.631565	1	FALSE	0.217875	6.78582	0.281329	1	FALSE	0.851682	6.78582	1.35896e-12	1.69829e-08	TRUE	-0.206067	6.7858	0.297692	1	FALSE
1	162038901	162039063	NOS1AP	ENSG00000198929	-500	162039564	162338241	+	768	51	TRUE	0.622482	4.33346	0.0103091	1	FALSE	-0.273436	4.33351	0.218562	1	FALSE	0.135049	4.33348	0.5341	1	FALSE	-0.999944	4.33349	0.000109556	1	FALSE	-0.595473	4.33349	0.184186	1	FALSE	0.518242	4.33351	0.0249392	1	FALSE	0.0223862	4.33335	0.858837	1	FALSE
1	162414240	162414645	SLAMF6P1	ENSG00000227243	-693	162415339	162415676	+	768	27	FALSE	1.2037	4.51552	0.000334898	1	FALSE	-1.50406	4.51552	3.845e-06	0.0433601	FALSE	-0.830004	4.51552	0.00753796	1	FALSE	-2.21011	4.51552	1.4602e-09	1.83459e-05	FALSE	2.33212	4.51552	6.09586e-08	0.000769176	FALSE	0.822827	4.51552	0.00975772	1	FALSE	-0.603037	4.51551	0.225864	1	FALSE
1	162582132	162584179	UAP1	ENSG00000117143	12504	162531323	162569627	+	768	307	TRUE	0.343773	7.28949	0.0108929	1	FALSE	-0.102705	7.28953	0.349748	1	FALSE	0.0996829	7.28951	0.337211	1	FALSE	-0.810797	7.28952	1.12851e-10	1.43637e-06	TRUE	-0.858121	7.28951	0.000151853	1	FALSE	0.830652	7.28953	9.8289e-14	1.23834e-09	TRUE	-0.750212	7.2894	1.31783e-05	0.174586	FALSE
1	162595941	162597741	DDR2	ENSG00000162733	-3421	162601163	162724618	+	768	734	TRUE	-0.0214041	9.43405	0.902399	1	FALSE	-0.114444	9.43405	0.303126	1	FALSE	-0.270694	9.43405	0.0124286	1	FALSE	-1.04785	9.43405	1.88145e-16	2.47825e-12	TRUE	-0.968751	9.43405	1.6664e-05	0.200267	FALSE	1.39564	9.43405	3.82896e-43	5.11549e-39	TRUE	-0.501484	9.43404	0.00348454	1	FALSE
1	162598902	162600662	DDR2	ENSG00000162733	-500	162601163	162724618	+	768	195	TRUE	0.0202782	6.54854	0.850673	1	FALSE	-0.00704386	6.54857	0.926614	1	FALSE	-0.0166567	6.54855	0.90515	1	FALSE	-0.92773	6.54856	6.66901e-12	8.59036e-08	TRUE	-1.15193	6.54856	2.62679e-06	0.0322412	FALSE	1.10921	6.54858	4.62244e-23	6.04846e-19	TRUE	-0.659681	6.54845	0.0002432	1	FALSE
1	162983777	162984349	RP11-331H2.3	ENSG00000227667	-34193	162949341	162949583	-	768	0	FALSE	0.345628	4.1504	0.323194	1	FALSE	-0.0180391	4.1504	1	1	FALSE	0.146813	4.1504	0.536829	1	FALSE	0.0469851	4.1504	0.624135	1	FALSE	-0.0378962	4.1504	0.95864	1	FALSE	-0.424196	4.1504	0.0494585	1	FALSE	-0.313249	4.1504	0.440199	1	FALSE
1	163063170	163063806	RGS4	ENSG00000117152	16577	163038935	163046592	+	768	103	TRUE	0.158104	5.27155	0.57592	1	FALSE	-0.60929	5.2716	0.0240272	1	FALSE	0.858027	5.27157	0.000236643	1	FALSE	-0.0985175	5.27159	0.792188	1	FALSE	-0.53115	5.27158	0.350429	1	FALSE	-0.639829	5.27161	0.0389983	1	FALSE	0.0498846	5.27141	0.826384	1	FALSE
1	164414796	164416686	HMGB3P6	ENSG00000213070	88194	164326004	164326601	+	768	1	FALSE	1.93822	4.27167	6.19571e-15	8.18206e-11	FALSE	-0.975212	4.27166	5.68628e-05	0.604508	FALSE	-0.402501	4.27167	0.141327	1	FALSE	-0.789644	4.27166	0.0082391	1	FALSE	-1.54429	4.27166	0.00428865	1	FALSE	0.575323	4.27166	0.033657	1	FALSE	-0.859131	4.2717	0.0312527	1	FALSE
1	165566675	165567199	RP11-306I1.2	ENSG00000236206	-500	165567700	165592568	+	768	38	FALSE	1.17236	4.42961	3.56504e-07	0.00435505	FALSE	-1.62481	4.42967	3.24408e-11	4.11577e-07	FALSE	0.212682	4.42963	0.213494	1	FALSE	0.0190846	4.42965	0.959061	1	FALSE	0.961112	4.42965	0.00254053	1	FALSE	-0.657269	4.42968	0.00650407	1	FALSE	-0.209718	4.42945	0.557489	1	FALSE
1	165599153	165599597	MGST3	ENSG00000143198	-500	165600098	165624857	+	768	70	TRUE	1.03269	4.72554	8.89207e-08	0.00110155	TRUE	-1.23461	4.72576	2.63464e-09	3.2493e-05	TRUE	-0.260351	4.72562	0.187849	1	FALSE	0.208909	4.72569	0.287145	1	FALSE	0.976442	4.72566	0.000297688	1	FALSE	-0.298209	4.72578	0.147991	1	FALSE	-0.151421	4.72502	0.57556	1	FALSE
1	165687138	165687840	RP11-466F5.6	ENSG00000215838	7932	165667987	165679205	+	768	28	FALSE	0.508682	4.6393	0.00684645	1	FALSE	-0.238416	4.6393	0.0948299	1	FALSE	-0.0629367	4.6393	0.714833	1	FALSE	-0.604414	4.6393	0.00285299	1	FALSE	-1.00473	4.6393	0.0135273	1	FALSE	0.863204	4.6393	4.16678e-07	0.00478347	FALSE	-0.543025	4.6393	0.0806904	1	FALSE
1	165894016	165895279	UCK2	ENSG00000143179	13160	165871832	165880855	+	768	247	TRUE	-0.168147	5.93733	0.375233	1	FALSE	0.680241	5.93738	1.79277e-07	0.00211762	FALSE	0.708862	5.93735	1.77608e-08	0.000222702	TRUE	-1.42314	5.93736	4.46471e-17	5.89208e-13	TRUE	-1.07945	5.93736	0.00019357	1	FALSE	-0.341638	5.93738	0.0399563	1	FALSE	-0.602109	5.93722	0.0053265	1	FALSE
1	165896158	165897633	RP11-7G12.2	ENSG00000271527	12838	165910472	165911006	-	768	166	TRUE	0.0951583	6.74687	0.538465	1	FALSE	0.639549	6.74689	3.89138e-08	0.00046751	FALSE	0.548525	6.74688	1.68806e-06	0.0202364	FALSE	-1.2865	6.74689	4.52697e-18	5.99417e-14	TRUE	-1.01744	6.74688	7.37934e-05	0.865597	FALSE	-0.330427	6.7469	0.0244177	1	FALSE	-0.493606	6.74681	0.0100717	1	FALSE
1	166008001	166010208	RNA5SP64	ENSG00000207341	-1272	166011481	166011587	+	768	3	FALSE	1.32047	4.5298	1.30358e-07	0.00160913	FALSE	-0.791736	4.52984	0.000803397	1	FALSE	0.689509	4.52981	0.000629021	1	FALSE	-1.76732	4.52983	2.35339e-09	2.94903e-05	FALSE	-0.453828	4.52982	0.440083	1	FALSE	0.0463693	4.52985	0.912407	1	FALSE	-0.710964	4.52969	0.0771596	1	FALSE
1	166136707	166136794	FAM78B	ENSG00000188859	-500	166039257	166136206	-	768	22	FALSE	0.641035	4.18478	0.0165685	1	FALSE	-0.0999464	4.18481	0.55711	1	FALSE	0.300083	4.18479	0.127932	1	FALSE	-0.934386	4.1848	3.09221e-05	0.347069	FALSE	-0.15107	4.1848	1	1	FALSE	0.13207	4.18482	0.613582	1	FALSE	-0.355987	4.18471	0.378176	1	FALSE
1	166459777	166460352	RP11-276E17.2	ENSG00000234142	-500	166445009	166459276	-	768	4	FALSE	0.873349	4.30818	0.000228909	1	FALSE	-0.625119	4.30822	0.00531901	1	FALSE	-0.709489	4.30819	0.00103355	1	FALSE	0.00217901	4.30821	0.915349	1	FALSE	-0.401224	4.3082	0.456991	1	FALSE	0.655188	4.30823	0.00160492	1	FALSE	0.0461802	4.30807	1	1	FALSE
1	166807652	166808180	POGK	ENSG00000143157	-500	166808681	166819948	+	768	91	TRUE	1.23458	5.16036	8.9933e-13	1.17587e-08	TRUE	-1.32689	5.16063	2.73191e-13	3.52471e-09	TRUE	-0.0519196	5.16046	0.896628	1	FALSE	-0.220164	5.16054	0.216299	1	FALSE	1.1999	5.16051	7.49075e-07	0.00928928	TRUE	-0.376614	5.16067	0.0414241	1	FALSE	-0.275877	5.1597	0.263651	1	FALSE
1	166846065	166846348	TADA1	ENSG00000152382	-500	166825747	166845564	-	768	70	TRUE	0.0746004	4.70158	0.71099	1	FALSE	-0.118455	4.70162	0.475412	1	FALSE	0.388173	4.7016	0.000779825	1	FALSE	0.0663309	4.70161	0.667796	1	FALSE	0.257997	4.70161	0.395512	1	FALSE	-0.521784	4.70163	0.0018479	1	FALSE	-0.473705	4.70148	0.0440596	1	FALSE
1	167523505	167523723	CREG1	ENSG00000143162	-500	167510250	167523004	-	768	369	TRUE	0.154025	6.12052	0.408422	1	FALSE	-0.907819	6.12047	7.4504e-08	0.000889206	TRUE	-0.342979	6.1205	0.0304124	1	FALSE	0.308527	6.12049	0.0635797	1	FALSE	0.890357	6.12049	0.000619044	1	FALSE	0.426237	6.12047	0.0146438	1	FALSE	0.0278855	6.12064	0.895046	1	FALSE
1	167524947	167525652	CREG1	ENSG00000143162	-1942	167510250	167523004	-	768	516	TRUE	-0.0675931	7.01404	0.778465	1	FALSE	-0.363652	7.01406	0.0181876	1	FALSE	-0.332065	7.01405	0.0281573	1	FALSE	0.25972	7.01405	0.102744	1	FALSE	0.12779	7.01405	0.603858	1	FALSE	0.415242	7.01406	0.0111606	1	FALSE	0.182506	7.01401	0.404181	1	FALSE
1	167532517	167534081	CREG1	ENSG00000143162	-9512	167510250	167523004	-	768	154	TRUE	-0.0010661	6.24804	0.928853	1	FALSE	-0.55274	6.24807	0.000356412	1	FALSE	-0.215958	6.24805	0.151004	1	FALSE	0.227777	6.24806	0.151135	1	FALSE	1.0002	6.24806	3.7614e-05	0.446628	FALSE	0.280177	6.24807	0.0917557	1	FALSE	-0.272665	6.24797	0.23475	1	FALSE
1	167569102	167571720	RP3-455J7.3	ENSG00000231029	8018	167560629	167561083	+	768	37	FALSE	-0.302088	5.39275	0.158705	1	FALSE	-0.679506	5.39285	2.44737e-05	0.265809	FALSE	0.571253	5.39278	1.75432e-05	0.202606	FALSE	0.546673	5.39281	0.000348706	1	FALSE	0.485076	5.3928	0.0500482	1	FALSE	-0.789664	5.39286	4.69769e-06	0.0522289	FALSE	-0.233098	5.3925	0.273559	1	FALSE
1	167585357	167588373	RP3-455J7.4	ENSG00000241666	8248	167596622	167599911	-	768	492	TRUE	-0.245559	8.67285	0.161172	1	FALSE	-0.559245	8.67286	2.20332e-05	0.239963	FALSE	0.259431	8.67286	0.0311932	1	FALSE	0.249418	8.67286	0.0669909	1	FALSE	0.597266	8.67286	0.00613843	1	FALSE	-0.11715	8.67286	0.425684	1	FALSE	0.0185526	8.67283	0.899689	1	FALSE
1	167588901	167590794	RP3-455J7.4	ENSG00000241666	5827	167596622	167599911	-	768	36	FALSE	-0.739742	5.22368	0.00492623	1	FALSE	-0.322477	5.22379	0.101988	1	FALSE	0.169619	5.22372	0.29691	1	FALSE	0.100131	5.22375	0.585842	1	FALSE	-0.176335	5.22374	0.636344	1	FALSE	0.198794	5.2238	0.369051	1	FALSE	0.524657	5.22341	0.0450473	1	FALSE
1	167682384	167686290	MPZL1	ENSG00000197965	-4138	167690429	167691251	+	768	55	TRUE	0.804558	6.26828	2.32965e-11	3.02063e-07	TRUE	-0.216901	6.26834	0.065926	1	FALSE	-0.0319853	6.2683	0.836996	1	FALSE	0.0245467	6.26832	0.795054	1	FALSE	-0.159697	6.26831	0.405458	1	FALSE	-0.487578	6.26835	3.83865e-05	0.411887	FALSE	0.0130748	6.26813	0.984797	1	FALSE
1	167688050	167689928	MPZL1	ENSG00000197965	-500	167690429	167691251	+	768	37	FALSE	-0.243076	5.79822	0.0905659	1	FALSE	-0.420885	5.79825	0.000293699	1	FALSE	0.147096	5.79823	0.161259	1	FALSE	-0.563499	5.79824	4.37294e-06	0.050901	FALSE	0.000935763	5.79824	0.968758	1	FALSE	1.03497	5.79826	4.10241e-23	5.36882e-19	FALSE	-0.644151	5.79815	0.00011707	1	FALSE
1	168147520	168147670	TIPRL	ENSG00000143155	-500	168148171	168169950	+	768	35	FALSE	0.232746	4.19843	0.677469	1	FALSE	-0.484692	4.19845	0.0576091	1	FALSE	-0.354159	4.19844	0.174827	1	FALSE	-0.162552	4.19845	0.682341	1	FALSE	0.318661	4.19844	0.888535	1	FALSE	0.638411	4.19846	0.00185845	1	FALSE	0.162848	4.19838	0.844878	1	FALSE
1	168194594	168194675	SFT2D2	ENSG00000213064	-500	168195176	168206008	+	768	446	TRUE	0.489708	5.32114	0.000511387	1	FALSE	-0.459297	5.32125	0.000292426	1	FALSE	0.374814	5.32118	0.000318332	1	FALSE	-0.140025	5.32121	0.370318	1	FALSE	0.704805	5.3212	0.000241372	1	FALSE	-0.489551	5.32126	0.000462284	1	FALSE	-0.51118	5.32086	0.00772609	1	FALSE
1	168242722	168243212	TBX19	ENSG00000143178	-7065	168250278	168283664	+	768	16	FALSE	0.1729	4.55386	0.334825	1	FALSE	-0.339486	4.55388	0.0250694	1	FALSE	0.381779	4.55387	0.00752561	1	FALSE	-0.168005	4.55387	0.396973	1	FALSE	0.122761	4.55387	0.560639	1	FALSE	0.0445891	4.55388	0.822356	1	FALSE	-0.434405	4.5538	0.0823608	1	FALSE
1	168311858	168313065	RP5-1059H15.1	ENSG00000227722	-25226	168338292	168338839	+	768	1	FALSE	0.490039	4.25368	0.0431416	1	FALSE	-0.340847	4.2537	0.179115	1	FALSE	-0.182356	4.25369	0.417372	1	FALSE	-0.749688	4.2537	0.0013213	1	FALSE	1.47774	4.25369	1.61513e-07	0.0020257	FALSE	-0.210312	4.25371	0.594434	1	FALSE	0.163197	4.25362	0.609173	1	FALSE
1	168317353	168317957	RP5-1059H15.1	ENSG00000227722	-20334	168338292	168338839	+	768	18	FALSE	0.371326	4.3313	0.255103	1	FALSE	-0.791339	4.33126	0.00881292	1	FALSE	0.117151	4.33129	0.650931	1	FALSE	-0.0557435	4.33127	0.89443	1	FALSE	-0.912823	4.33128	0.123764	1	FALSE	0.486106	4.33126	0.107201	1	FALSE	0.275919	4.33139	0.438633	1	FALSE
1	168318187	168318466	RP5-1059H15.1	ENSG00000227722	-19825	168338292	168338839	+	768	131	TRUE	-0.158327	4.86226	0.502947	1	FALSE	0.160115	4.86226	0.247162	1	FALSE	0.0373465	4.86226	0.812979	1	FALSE	-0.0172843	4.86226	0.913366	1	FALSE	-0.114033	4.86226	0.846985	1	FALSE	-0.0655492	4.86226	0.61285	1	FALSE	-0.0253959	4.86225	0.659054	1	FALSE
1	169056744	169056757	LINC00970	ENSG00000203601	-500	168873143	169056243	-	768	24	FALSE	0.321653	4.12393	0.0960798	1	FALSE	-0.19209	4.12393	0.296667	1	FALSE	-0.0409963	4.12393	0.842257	1	FALSE	-0.186887	4.12393	0.40435	1	FALSE	0.0815725	4.12393	0.748736	1	FALSE	0.147976	4.12393	0.29752	1	FALSE	0.0245413	4.12392	1	1	FALSE
1	169060369	169061033	LINC00970	ENSG00000203601	-4125	168873143	169056243	-	768	0	FALSE	-0.218209	4.19277	0.499054	1	FALSE	-0.0513587	4.19278	0.802426	1	FALSE	0.0606101	4.19277	0.897803	1	FALSE	-0.11816	4.19278	0.948265	1	FALSE	-0.739014	4.19277	0.189957	1	FALSE	0.597852	4.19278	0.0093712	1	FALSE	-0.333943	4.19273	0.471953	1	FALSE
1	169863909	169864303	SCYL3	ENSG00000000457	-500	169823652	169863408	-	768	34	FALSE	0.476037	4.51755	0.00765334	1	FALSE	-0.872265	4.51763	9.16806e-07	0.0105799	FALSE	0.188254	4.51758	0.18473	1	FALSE	-0.166134	4.5176	0.396124	1	FALSE	-0.277827	4.51759	0.39175	1	FALSE	0.599747	4.51764	0.000360116	1	FALSE	-0.417382	4.51736	0.0883443	1	FALSE
1	169877233	169878919	KIFAP3	ENSG00000075945	11547	169890467	170038058	-	768	10	FALSE	-0.262701	4.98495	0.228993	1	FALSE	-0.37855	4.98497	0.00887312	1	FALSE	0.522415	4.98495	5.85174e-05	0.659725	FALSE	-0.163068	4.98496	0.316426	1	FALSE	-0.496229	4.98496	0.0717916	1	FALSE	0.27573	4.98497	0.0543055	1	FALSE	-0.2065	4.98491	0.314008	1	FALSE
1	169885011	169885400	KIFAP3	ENSG00000075945	5066	169890467	170038058	-	768	0	FALSE	0.0174501	4.17714	1	1	FALSE	0.076876	4.17714	0.892527	1	FALSE	0.291666	4.17714	0.127174	1	FALSE	0.0127729	4.17714	1	1	FALSE	-0.552444	4.17714	0.355433	1	FALSE	-0.146075	4.17715	0.754942	1	FALSE	-0.449966	4.17713	0.496253	1	FALSE
1	170822487	170823196	MROH9	ENSG00000117501	-81415	170904612	171033906	+	768	19	FALSE	-0.0263068	4.69752	1	1	FALSE	-0.857554	4.69757	2.44713e-05	0.265808	FALSE	1.31954	4.69754	1.0564e-15	1.39856e-11	FALSE	-0.586006	4.69755	0.0180321	1	FALSE	-0.398236	4.69755	0.305194	1	FALSE	-0.801957	4.69757	0.000991844	1	FALSE	0.0916544	4.69739	0.735661	1	FALSE
1	170900913	170901701	MROH9	ENSG00000117501	-2910	170904612	171033906	+	768	0	FALSE	0.082161	4.25599	0.820371	1	FALSE	-0.405035	4.25601	0.0428528	1	FALSE	0.804994	4.25599	1.36572e-06	0.0164242	FALSE	-0.684097	4.256	0.00559753	1	FALSE	-0.707006	4.256	0.147117	1	FALSE	-0.0180202	4.25601	0.893047	1	FALSE	0.0120549	4.25594	1	1	FALSE
1	171282339	171282846	FMO4	ENSG00000076258	-500	171283347	171292331	+	768	1	FALSE	0.121389	4.1607	0.741382	1	FALSE	-0.422679	4.16071	0.05912	1	FALSE	0.693487	4.1607	0.000208247	1	FALSE	-0.0906052	4.1607	0.786632	1	FALSE	-0.663723	4.1607	0.200947	1	FALSE	-0.232687	4.16071	0.339663	1	FALSE	-0.344051	4.16066	0.234027	1	FALSE
1	171389361	171390109	RNU6-290P	ENSG00000202082	-1471	171387783	171387889	-	768	0	FALSE	0.324969	4.14335	0.0911279	1	FALSE	-0.327788	4.14336	0.100062	1	FALSE	0.340705	4.14336	0.061239	1	FALSE	-0.271215	4.14336	0.296405	1	FALSE	-0.428717	4.14336	0.496632	1	FALSE	0.0463253	4.14336	0.922433	1	FALSE	-0.0502782	4.14333	1	1	FALSE
1	171711888	171712667	VAMP4	ENSG00000117533	-500	171669300	171711387	-	768	443	TRUE	0.338822	6.5909	0.00995162	1	FALSE	-0.71513	6.59099	3.37605e-11	4.28252e-07	TRUE	0.181952	6.59094	0.0590456	1	FALSE	-0.38862	6.59096	0.000860195	1	FALSE	0.169678	6.59095	0.366428	1	FALSE	0.55938	6.591	4.1444e-07	0.00475919	FALSE	-0.149655	6.5907	0.355171	1	FALSE
1	171749499	171750287	METTL13	ENSG00000010165	-500	171750788	171766101	+	768	14	FALSE	0.826632	4.55514	1.40411e-05	0.163649	FALSE	-0.572505	4.5552	0.00360725	1	FALSE	-0.296073	4.55516	0.144448	1	FALSE	0.225319	4.55518	0.175139	1	FALSE	0.44693	4.55517	0.160413	1	FALSE	-0.156501	4.55521	0.410846	1	FALSE	-0.301958	4.55497	0.428472	1	FALSE
1	171809900	171810120	DNM3	ENSG00000197959	-500	171810621	172381856	+	768	53	TRUE	0.385861	4.6188	0.031551	1	FALSE	-0.111762	4.61879	0.629253	1	FALSE	0.437963	4.6188	0.00149162	1	FALSE	-0.50597	4.6188	0.00334163	1	FALSE	-0.569525	4.6188	0.0797706	1	FALSE	-0.039859	4.61879	0.676301	1	FALSE	-0.243808	4.61883	0.330772	1	FALSE
1	172500713	172500988	SUCO	ENSG00000094975	-500	172501489	172580971	+	768	218	TRUE	0.622769	5.21457	1.53703e-05	0.178772	FALSE	-0.69394	5.21465	1.10028e-07	0.00130812	TRUE	-0.192913	5.2146	0.148261	1	FALSE	-0.00130612	5.21462	1	1	FALSE	0.150518	5.21461	0.457634	1	FALSE	0.52202	5.21466	0.000108279	1	FALSE	-0.379457	5.21437	0.0553534	1	FALSE
1	172608084	172608836	FASLG	ENSG00000117560	-19317	172628154	172636014	+	768	1	FALSE	-0.377417	4.15681	0.322279	1	FALSE	0.0251576	4.15682	1	1	FALSE	-0.200627	4.15682	0.303472	1	FALSE	-0.203759	4.15682	0.624518	1	FALSE	0.106233	4.15682	0.690813	1	FALSE	0.69646	4.15682	0.00246532	1	FALSE	-0.255897	4.15679	0.666232	1	FALSE
1	172612764	172613516	FASLG	ENSG00000117560	-14637	172628154	172636014	+	768	0	FALSE	0.256424	4.12249	0.0652762	1	FALSE	0.122557	4.12249	0.339466	1	FALSE	-0.148273	4.12249	0.323463	1	FALSE	-0.13835	4.12249	0.5768	1	FALSE	-0.122381	4.12249	1	1	FALSE	-0.0178257	4.12249	1	1	FALSE	0.0688206	4.12248	0.90138	1	FALSE
1	172666010	172669886	FASLG	ENSG00000117560	29995	172628158	172636014	+	768	0	FALSE	0.688412	4.50519	0.00537897	1	FALSE	-0.0508966	4.50521	0.898553	1	FALSE	-0.369872	4.5052	0.0645691	1	FALSE	-0.623264	4.5052	0.00629761	1	FALSE	-1.54857	4.5052	0.00109374	1	FALSE	0.737204	4.50521	0.000455525	1	FALSE	-0.0227105	4.50514	0.984639	1	FALSE
1	172714212	172716960	SLC25A38P1	ENSG00000229785	-739	172717700	172718642	+	768	14	FALSE	-0.188361	4.67903	0.57286	1	FALSE	-0.44768	4.67924	0.091099	1	FALSE	0.0237064	4.67911	0.839081	1	FALSE	-0.134908	4.67918	0.639411	1	FALSE	0.535163	4.67915	0.199151	1	FALSE	0.263606	4.67927	0.336703	1	FALSE	0.374016	4.67851	0.24888	1	FALSE
1	173080680	173081718	GOT2P2	ENSG00000230849	28520	173110239	173111489	-	768	2	FALSE	0.206186	4.32455	0.408207	1	FALSE	-0.529018	4.32461	0.00533828	1	FALSE	-0.702485	4.32457	0.000891163	1	FALSE	0.671608	4.32459	0.000244307	1	FALSE	-0.394895	4.32458	0.289067	1	FALSE	0.0519947	4.32461	0.925301	1	FALSE	0.684057	4.32443	0.00795868	1	FALSE
1	173091657	173092943	GOT2P2	ENSG00000230849	17295	173110239	173111489	-	768	0	FALSE	-0.025486	4.41811	1	1	FALSE	-0.166277	4.41815	0.413578	1	FALSE	-0.504246	4.41812	0.0133596	1	FALSE	0.616173	4.41814	0.00107103	1	FALSE	-0.429954	4.41813	0.392354	1	FALSE	-0.143577	4.41816	0.449207	1	FALSE	0.526323	4.41799	0.0572743	1	FALSE
1	173378911	173380986	RP11-296O14.3	ENSG00000203739	5945	173386932	173430501	-	768	44	TRUE	-0.946448	5.3042	0.00115022	1	FALSE	-0.151734	5.30432	0.434058	1	FALSE	-1.35353	5.30424	2.6773e-11	3.46978e-07	TRUE	0.507109	5.30428	0.0112614	1	FALSE	1.47647	5.30427	5.82383e-07	0.00723902	TRUE	0.306759	5.30434	0.167544	1	FALSE	0.476093	5.30391	0.0757774	1	FALSE
1	173381571	173381931	RP11-296O14.3	ENSG00000203739	5000	173386932	173430501	-	768	21	FALSE	-0.0422622	4.35627	1	1	FALSE	-0.374454	4.35632	0.081169	1	FALSE	-0.427639	4.35629	0.0437548	1	FALSE	0.346021	4.3563	0.0730015	1	FALSE	0.328521	4.3563	0.392122	1	FALSE	0.452809	4.35632	0.0340756	1	FALSE	-0.0873929	4.35615	0.793461	1	FALSE
1	173444956	173445904	PRDX6	ENSG00000117592	-500	173446405	173457946	+	768	642	TRUE	0.398477	7.22408	1.82608e-05	0.211661	FALSE	-0.316033	7.2241	4.63121e-05	0.495354	FALSE	0.394557	7.22409	2.33983e-08	0.0002929	FALSE	-0.0312578	7.22409	0.743519	1	FALSE	-0.217501	7.22409	0.12396	1	FALSE	-0.644176	7.2241	1.40578e-13	1.7696e-09	FALSE	0.200556	7.22405	0.0553939	1	FALSE
1	173683437	173683579	KLHL20	ENSG00000076321	-500	173684080	173702967	+	768	124	TRUE	1.19026	4.58887	5.29013e-13	6.92319e-09	TRUE	-0.209846	4.58891	0.302917	1	FALSE	0.544501	4.58889	0.000219097	1	FALSE	-0.741746	4.5889	0.000193718	1	FALSE	-0.733747	4.58889	0.0121384	1	FALSE	-0.835763	4.58891	2.64579e-05	0.285878	FALSE	-0.502771	4.58879	0.0285867	1	FALSE
1	174013466	174014848	RP11-160H22.3	ENSG00000224977	21342	173991647	173992123	+	768	1	FALSE	-0.634234	4.24939	0.0238301	1	FALSE	-0.45182	4.24939	0.0240844	1	FALSE	0.100126	4.24939	0.626026	1	FALSE	-0.128603	4.24939	0.784266	1	FALSE	-0.498873	4.24939	0.412487	1	FALSE	0.883731	4.24939	2.8024e-05	0.302463	FALSE	0.099787	4.24941	0.859122	1	FALSE
1	174046485	174047442	RPL30P1	ENSG00000225713	11831	174059274	174059612	-	768	0	FALSE	-0.221609	4.13642	0.647084	1	FALSE	-0.0339204	4.13643	1	1	FALSE	-0.245102	4.13643	0.233086	1	FALSE	0.00183111	4.13643	1	1	FALSE	1.26769	4.13643	1.93109e-05	0.231538	FALSE	-0.136165	4.13643	0.722162	1	FALSE	-0.192564	4.13641	0.96702	1	FALSE
1	174993062	174993540	MRPS14	ENSG00000120333	-500	174982094	174992561	-	768	66	TRUE	0.819738	4.98948	1.67785e-05	0.194799	FALSE	-1.44626	4.98971	2.1161e-14	2.75051e-10	TRUE	-0.169526	4.98956	0.397135	1	FALSE	0.439258	4.98964	0.00901054	1	FALSE	1.00425	4.98961	9.87156e-05	1	FALSE	-0.222179	4.98974	0.255572	1	FALSE	-0.249683	4.98891	0.331997	1	FALSE
1	174998176	174999274	MRPS14	ENSG00000120333	-5614	174982094	174992561	-	768	1	FALSE	0.238717	4.3282	0.335949	1	FALSE	-0.338562	4.32823	0.084231	1	FALSE	0.0163684	4.32821	1	1	FALSE	-0.140277	4.32822	0.618942	1	FALSE	0.132589	4.32822	0.725446	1	FALSE	0.502766	4.32824	0.00704901	1	FALSE	-0.631568	4.32811	0.0578025	1	FALSE
1	175162636	175163165	KIAA0040	ENSG00000235750	-500	175130180	175162135	-	768	33	FALSE	0.765429	4.43226	0.000583851	1	FALSE	-0.765068	4.43239	0.000526537	1	FALSE	-0.0655876	4.43231	0.919978	1	FALSE	-0.480856	4.43235	0.0227676	1	FALSE	0.444237	4.43234	0.16303	1	FALSE	0.421442	4.43241	0.0385837	1	FALSE	-0.115795	4.43196	0.670342	1	FALSE
1	175175882	175180396	RP5-1114G22.2	ENSG00000230687	-1896	175172364	175173985	-	768	1	FALSE	1.08054	4.53761	1.13801e-09	1.44982e-05	FALSE	-0.709153	4.53771	0.000466028	1	FALSE	-0.111584	4.53764	0.668364	1	FALSE	-0.352235	4.53768	0.0318738	1	FALSE	0.126973	4.53767	0.95339	1	FALSE	-0.00517677	4.53772	0.976157	1	FALSE	0.127442	4.53737	0.508421	1	FALSE
1	175187123	175190565	RP5-1114G22.2	ENSG00000230687	-13137	175172364	175173985	-	768	0	FALSE	0.309809	4.20622	0.112488	1	FALSE	-0.2302	4.20624	0.279936	1	FALSE	0.228226	4.20622	0.246923	1	FALSE	-0.242534	4.20623	0.176019	1	FALSE	0.429364	4.20623	0.229462	1	FALSE	-0.397999	4.20624	0.0875277	1	FALSE	0.1378	4.20617	0.497492	1	FALSE
1	175193784	175196133	RP5-1114G22.2	ENSG00000230687	-19798	175172364	175173985	-	768	7	FALSE	-0.303798	4.45525	0.318953	1	FALSE	-0.712549	4.45538	0.0023917	1	FALSE	0.194565	4.4553	0.316557	1	FALSE	-0.512778	4.45534	0.0306536	1	FALSE	1.48877	4.45533	1.74146e-07	0.00218257	FALSE	0.11898	4.4554	0.603776	1	FALSE	0.128496	4.45495	0.68085	1	FALSE
1	175205134	175206992	RP5-1114G22.2	ENSG00000230687	-31148	175172364	175173985	-	768	11	FALSE	0.522588	4.61871	0.0505692	1	FALSE	-0.23009	4.61891	0.432357	1	FALSE	0.607508	4.61879	0.00135154	1	FALSE	-0.505287	4.61885	0.0327338	1	FALSE	0.296175	4.61883	0.476545	1	FALSE	-0.735476	4.61894	0.00548741	1	FALSE	-0.348914	4.61823	0.385815	1	FALSE
1	175255971	175258015	RP5-1114G22.1	ENSG00000233946	-8200	175266216	175266376	+	768	2	FALSE	0.85518	4.32149	0.000547192	1	FALSE	-0.311692	4.32156	0.231414	1	FALSE	0.0828781	4.32151	0.635653	1	FALSE	-0.108398	4.32154	0.667652	1	FALSE	-0.0885548	4.32153	0.941437	1	FALSE	-0.752137	4.32157	0.00423478	1	FALSE	0.236361	4.3213	0.458553	1	FALSE
1	175275330	175275853	RP3-518E13.2	ENSG00000260990	-500	175276354	175304595	+	768	0	FALSE	0.234372	4.13164	0.44676	1	FALSE	-0.0299993	4.13164	1	1	FALSE	-0.153415	4.13164	0.228093	1	FALSE	-0.199096	4.13164	0.145525	1	FALSE	-0.248757	4.13164	0.881196	1	FALSE	0.164037	4.13164	0.383434	1	FALSE	0.3061	4.13164	0.245216	1	FALSE
1	177778648	177779346	RP11-63B19.1	ENSG00000236720	99182	177669659	177679465	+	768	1	FALSE	0.463771	4.19988	0.0509627	1	FALSE	-0.263975	4.19989	0.241289	1	FALSE	0.422966	4.19988	0.0170118	1	FALSE	-0.504863	4.19989	0.0570709	1	FALSE	-0.12664	4.19989	1	1	FALSE	-0.258477	4.19989	0.320557	1	FALSE	0.0639979	4.19984	0.905881	1	FALSE
1	177785754	177788766	SEC16B	ENSG00000120341	104324	177893091	177897620	-	768	0	FALSE	0.965264	4.44855	3.15421e-05	0.361851	FALSE	-0.731387	4.4486	0.00101479	1	FALSE	0.300213	4.44857	0.0773174	1	FALSE	-0.575783	4.44859	0.0285041	1	FALSE	1.00494	4.44858	0.00120449	1	FALSE	-0.500696	4.44861	0.0269914	1	FALSE	-0.377804	4.44843	0.22675	1	FALSE
1	177793133	177794193	SEC16B	ENSG00000120341	98897	177893091	177897620	-	768	83	TRUE	0.222263	5.48775	0.479697	1	FALSE	-1.7479	5.48777	6.5684e-09	8.02987e-05	TRUE	0.195561	5.48775	0.43281	1	FALSE	-3.37781	5.48776	1.59417e-19	2.11706e-15	TRUE	2.12192	5.48776	2.93473e-08	0.000371743	TRUE	0.956908	5.48777	0.000613311	1	FALSE	-0.0993863	5.48768	0.881902	1	FALSE
1	178025200	178025730	RP4-798P15.3	ENSG00000254154	-18057	177897926	178007142	-	768	3	FALSE	0.259115	4.14233	0.308576	1	FALSE	-0.276993	4.14233	0.139449	1	FALSE	0.480112	4.14233	0.00173493	1	FALSE	-0.440097	4.14233	0.0225451	1	FALSE	-0.393595	4.14233	0.536868	1	FALSE	-0.0995764	4.14233	0.847455	1	FALSE	0.0955403	4.14233	1	1	FALSE
1	178455379	178456736	RP4-593C16.3	ENSG00000260938	5037	178449742	178450341	+	768	155	TRUE	-1.79011	6.87637	1.0681e-05	0.124979	FALSE	-0.068974	6.87638	0.822523	1	FALSE	1.28185	6.87637	4.15238e-08	0.000517843	TRUE	0.258667	6.87638	0.339899	1	FALSE	-0.908458	6.87638	0.1144	1	FALSE	-0.923222	6.87639	0.00482999	1	FALSE	-1.20168	6.87633	0.00808543	1	FALSE
1	178542392	178543095	RNA5SP69	ENSG00000201347	12227	178530048	178530164	+	768	757	TRUE	0.546976	9.8596	1.98916e-05	0.230245	FALSE	0.0164971	9.85961	0.862864	1	FALSE	0.143773	9.8596	0.148273	1	FALSE	0.11909	9.85961	0.290881	1	FALSE	0.497842	9.85961	0.00603254	1	FALSE	-1.28881	9.85961	3.86724e-25	5.08e-21	TRUE	-0.190769	9.85959	0.239659	1	FALSE
1	178544204	178553289	RNA5SP69	ENSG00000201347	14039	178530048	178530164	+	768	753	TRUE	0.710249	11.4807	3.04741e-09	3.86473e-05	TRUE	-0.111298	11.4807	0.274401	1	FALSE	0.167458	11.4807	0.0783554	1	FALSE	0.0387304	11.4807	0.712307	1	FALSE	0.634985	11.4807	0.000199571	1	FALSE	-1.29613	11.4807	4.02749e-28	5.31749e-24	TRUE	-0.231695	11.4807	0.133796	1	FALSE
1	178568025	178569918	RNA5SP69	ENSG00000201347	37860	178530048	178530164	+	768	81	TRUE	0.303524	6.10244	0.0554605	1	FALSE	-1.27257	6.10251	6.31397e-20	8.39e-16	TRUE	0.574364	6.10247	1.24324e-06	0.0149637	FALSE	0.525271	6.10249	6.69677e-05	0.737783	FALSE	0.386483	6.10248	0.0740465	1	FALSE	-0.346239	6.10252	0.0173315	1	FALSE	-0.773463	6.10228	0.000149213	1	FALSE
1	178571995	178579146	RP5-1098D14.1	ENSG00000273384	-41694	178620841	178621417	+	768	183	TRUE	0.761679	7.78644	1.02855e-09	1.3113e-05	TRUE	-1.48699	7.78647	7.03507e-45	9.45865e-41	TRUE	0.167731	7.78645	0.0905153	1	FALSE	-0.120567	7.78646	0.326955	1	FALSE	0.662752	7.78646	0.0001991	1	FALSE	0.417657	7.78648	0.000249053	1	FALSE	-0.395764	7.78636	0.0146377	1	FALSE
1	178627735	178630250	RP5-1098D14.1	ENSG00000273384	6317	178620841	178621417	+	768	2	FALSE	0.231559	5.39306	0.132902	1	FALSE	-1.03099	5.39312	2.10076e-13	2.71334e-09	FALSE	0.05214	5.39308	0.620112	1	FALSE	0.716817	5.3931	8.82937e-08	0.00107683	FALSE	0.0715719	5.39309	0.797333	1	FALSE	0.191149	5.39312	0.184143	1	FALSE	-0.678427	5.39291	0.00105453	1	FALSE
1	178633147	178634245	RP5-1098D14.1	ENSG00000273384	11729	178620841	178621417	+	768	97	TRUE	-0.0550593	5.44427	0.83288	1	FALSE	-0.437453	5.44434	0.00301131	1	FALSE	0.14846	5.44429	0.22978	1	FALSE	0.906577	5.44432	7.78668e-12	1.0023e-07	TRUE	0.267136	5.44431	0.239789	1	FALSE	-0.934391	5.44435	1.57839e-08	0.000187891	TRUE	-0.443591	5.44409	0.0459297	1	FALSE
1	178653235	178654782	MIR4424	ENSG00000266417	6265	178646884	178646969	+	768	14	FALSE	-0.63693	4.84529	0.0622714	1	FALSE	-0.531935	4.84523	0.0376772	1	FALSE	1.24501	4.84527	6.01117e-09	7.59331e-05	FALSE	-0.155761	4.84525	0.609668	1	FALSE	-0.879984	4.84526	0.0942694	1	FALSE	-0.492033	4.84522	0.0811835	1	FALSE	-0.308557	4.84544	0.489736	1	FALSE
1	178942009	178943475	FAM20B	ENSG00000116199	-51463	178994939	179019451	+	768	3	FALSE	0.211501	4.46755	0.462791	1	FALSE	-0.818544	4.46762	0.000165771	1	FALSE	0.613936	4.46757	0.000343969	1	FALSE	0.286868	4.46759	0.158664	1	FALSE	0.27344	4.46759	0.496754	1	FALSE	-0.499035	4.46763	0.0452901	1	FALSE	-0.642862	4.46738	0.0981619	1	FALSE
1	178971474	178972228	FAM20B	ENSG00000116199	-22710	178994939	179019451	+	768	0	FALSE	0.369502	4.12893	0.0299721	1	FALSE	0.050887	4.12894	1	1	FALSE	-0.136066	4.12893	0.338813	1	FALSE	-0.153704	4.12893	0.628545	1	FALSE	0.256705	4.12893	0.317817	1	FALSE	-0.148955	4.12894	0.694943	1	FALSE	-0.0194317	4.12892	1	1	FALSE
1	179199320	179200035	ABL2	ENSG00000143322	-500	179079716	179198819	-	768	50	TRUE	-0.0921305	4.95405	0.653537	1	FALSE	-0.0837989	4.95409	0.510763	1	FALSE	0.0591379	4.95407	0.750014	1	FALSE	-1.00669	4.95408	2.69945e-10	3.42318e-06	TRUE	-0.547516	4.95407	0.0313371	1	FALSE	0.988262	4.95409	2.70929e-15	3.44189e-11	TRUE	-0.155159	4.95397	0.318398	1	FALSE
1	179214243	179214940	COX5BP8	ENSG00000223794	-9927	179224868	179225216	+	768	1	FALSE	0.113648	4.27775	0.967792	1	FALSE	0.0651878	4.27777	0.755183	1	FALSE	0.406348	4.27775	0.0194684	1	FALSE	-0.508824	4.27776	0.0615396	1	FALSE	-0.038304	4.27776	0.973601	1	FALSE	0.00784224	4.27777	1	1	FALSE	-0.59163	4.2777	0.0684945	1	FALSE
1	179261829	179262424	SOAT1	ENSG00000057252	-500	179262925	179322942	+	768	39	TRUE	0.085887	4.66933	0.66289	1	FALSE	0.104073	4.66935	0.586136	1	FALSE	-0.325307	4.66933	0.0290376	1	FALSE	-0.0340619	4.66934	0.808107	1	FALSE	0.14591	4.66934	0.706192	1	FALSE	0.219316	4.66935	0.24096	1	FALSE	-0.0561457	4.66928	0.895041	1	FALSE
1	180123044	180123468	QSOX1	ENSG00000116260	-500	180123969	180173165	+	768	112	TRUE	0.276179	4.97524	0.114244	1	FALSE	-1.02558	4.97536	3.84551e-12	4.91803e-08	TRUE	0.367546	4.97528	0.00223641	1	FALSE	-0.25203	4.97532	0.0981814	1	FALSE	0.789868	4.97531	0.000276951	1	FALSE	-0.371899	4.97538	0.0213217	1	FALSE	0.636193	4.97494	0.00028936	1	FALSE
1	180182568	180183476	QSOX1	ENSG00000116260	9402	180123969	180173165	+	768	1	FALSE	0.134811	4.21814	0.705609	1	FALSE	0.193592	4.21815	0.42801	1	FALSE	-0.347446	4.21814	0.0930962	1	FALSE	-0.554831	4.21814	0.0213463	1	FALSE	0.277741	4.21814	0.338035	1	FALSE	0.593241	4.21815	0.0105314	1	FALSE	-0.320655	4.21811	0.508895	1	FALSE
1	180472590	180472942	ACBD6	ENSG00000135847	-500	180257365	180472089	-	768	49	TRUE	0.00931589	4.62339	0.976248	1	FALSE	-0.468868	4.62348	0.00659428	1	FALSE	0.394515	4.62343	0.00376625	1	FALSE	-0.0668527	4.62345	0.652935	1	FALSE	0.669544	4.62345	0.00703201	1	FALSE	-0.40669	4.6235	0.0409147	1	FALSE	0.0730172	4.62317	0.82267	1	FALSE
1	180494135	180494852	Y_RNA	ENSG00000206905	-5879	180488152	180488255	-	768	0	FALSE	0.224513	4.12434	0.132657	1	FALSE	0.00339813	4.12434	1	1	FALSE	-0.023697	4.12434	0.842257	1	FALSE	-0.0701306	4.12434	1	1	FALSE	0.0959198	4.12434	0.748736	1	FALSE	-0.0496527	4.12434	1	1	FALSE	-0.154466	4.12434	0.925804	1	FALSE
1	180600595	180600639	XPR1	ENSG00000143324	-500	180601140	180859387	+	768	13	FALSE	-0.285469	4.16417	0.404029	1	FALSE	0.0247858	4.16419	0.945072	1	FALSE	0.07269	4.16418	0.648225	1	FALSE	-0.218448	4.16418	0.339404	1	FALSE	0.234268	4.16418	0.474125	1	FALSE	0.310451	4.16419	0.271814	1	FALSE	-0.225279	4.16414	0.810033	1	FALSE
1	180992548	180992800	STX6	ENSG00000135823	-500	180941861	180992047	-	768	25	FALSE	0.685798	4.30219	0.00310941	1	FALSE	-0.307757	4.30226	0.231493	1	FALSE	-0.296161	4.30221	0.178719	1	FALSE	-0.608126	4.30223	0.0123061	1	FALSE	1.46508	4.30223	1.8482e-08	0.000234685	FALSE	-0.0084325	4.30227	1	1	FALSE	-0.742129	4.30201	0.0279148	1	FALSE
1	181001872	181002566	MR1	ENSG00000153029	-500	181003067	181024725	+	768	13	FALSE	0.331456	4.60861	0.0487912	1	FALSE	-0.392793	4.60859	0.0134573	1	FALSE	0.345112	4.6086	0.0123458	1	FALSE	-0.644139	4.6086	0.000344877	1	FALSE	0.968586	4.6086	1.62098e-05	0.194923	FALSE	-0.195611	4.60859	0.203683	1	FALSE	-0.124343	4.60864	0.8125	1	FALSE
1	181053313	181053915	IER5	ENSG00000162783	-3722	181057638	181059977	+	768	1	FALSE	0.0405249	4.38056	1	1	FALSE	-0.0882561	4.38056	0.665365	1	FALSE	-0.144533	4.38056	0.430158	1	FALSE	-0.387238	4.38056	0.0824052	1	FALSE	0.288061	4.38056	0.206699	1	FALSE	0.618042	4.38056	0.00146305	1	FALSE	-0.319166	4.38056	0.256831	1	FALSE
1	181055938	181057137	IER5	ENSG00000162783	-500	181057638	181059977	+	768	526	TRUE	-0.128182	7.46914	0.409107	1	FALSE	-0.682142	7.46915	3.56167e-09	4.37979e-05	FALSE	-0.337202	7.46914	0.00224418	1	FALSE	-0.550069	7.46915	2.38513e-05	0.269233	FALSE	0.631877	7.46915	0.000974989	1	FALSE	1.33574	7.46915	2.62092e-36	3.48844e-32	TRUE	-0.557499	7.46913	0.0020031	1	FALSE
1	181073540	181075452	RP11-309G3.3	ENSG00000272198	11504	181060245	181062035	+	768	215	TRUE	0.30852	6.58058	0.0414963	1	FALSE	-1.10841	6.58072	2.34475e-17	3.09132e-13	TRUE	0.0665664	6.58063	0.507446	1	FALSE	0.549605	6.58068	1.45342e-05	0.165733	FALSE	1.1509	6.58066	1.89743e-09	2.43326e-05	TRUE	-0.425806	6.58074	0.00242106	1	FALSE	-0.271706	6.58025	0.148742	1	FALSE
1	181096577	181099859	RP11-309G3.3	ENSG00000272198	34541	181060245	181062035	+	768	35	FALSE	0.837467	5.64015	4.79157e-06	0.0568568	FALSE	-1.25662	5.64032	4.08309e-13	5.26229e-09	FALSE	-0.447642	5.64021	0.00712876	1	FALSE	-0.0778371	5.64026	0.650094	1	FALSE	1.95138	5.64025	7.23974e-20	9.60279e-16	FALSE	-0.238651	5.64034	0.219731	1	FALSE	-0.258535	5.63975	0.315045	1	FALSE
1	181100240	181106124	RP11-540K16.1	ENSG00000237292	-37495	181143620	181151344	+	768	44	TRUE	1.02656	6.61319	3.86718e-09	4.89585e-05	TRUE	-1.83228	6.61333	9.11257e-29	1.2219e-24	TRUE	-0.532146	6.61324	0.000500833	1	FALSE	-0.0811386	6.61329	0.648704	1	FALSE	2.51865	6.61327	3.66454e-39	4.90462e-35	TRUE	-0.567055	6.61335	0.00136784	1	FALSE	-0.605469	6.61286	0.0125495	1	FALSE
1	181110296	181111998	RP11-540K16.1	ENSG00000237292	-31621	181143620	181151344	+	768	20	FALSE	0.607429	5.12906	0.00554575	1	FALSE	-1.77628	5.12912	2.61822e-18	3.46182e-14	FALSE	0.198151	5.12908	0.23489	1	FALSE	0.0307312	5.1291	0.879496	1	FALSE	2.35246	5.12909	7.21497e-23	9.5988e-19	FALSE	-0.999298	5.12913	7.66976e-06	0.0846665	FALSE	-0.793127	5.1289	0.0119731	1	FALSE
1	181117756	181119682	RP11-540K16.1	ENSG00000237292	-23937	181143620	181151344	+	768	2	FALSE	0.89334	4.50593	1.37034e-05	0.159754	FALSE	-0.977396	4.50598	2.16499e-06	0.0246485	FALSE	-0.116221	4.50595	0.664882	1	FALSE	0.02238	4.50596	1	1	FALSE	1.85658	4.50596	1.92865e-14	2.53328e-10	FALSE	-1.20181	4.50598	3.36465e-07	0.00387603	FALSE	-0.273792	4.50581	0.272279	1	FALSE
1	181119819	181123160	RP11-540K16.1	ENSG00000237292	-20459	181143620	181151344	+	768	1	FALSE	0.438155	4.86497	0.0219853	1	FALSE	-1.15437	4.86505	1.79061e-10	2.24937e-06	FALSE	0.0862161	4.865	0.574553	1	FALSE	-0.226427	4.86503	0.244389	1	FALSE	1.81429	4.86502	6.48897e-17	8.57323e-13	FALSE	-0.199671	4.86507	0.275484	1	FALSE	-0.331186	4.86475	0.167258	1	FALSE
1	181128154	181131287	RP11-540K16.1	ENSG00000237292	-12332	181143620	181151344	+	768	3	FALSE	0.897956	4.88813	1.45238e-06	0.0174939	FALSE	-1.03067	4.88821	1.18591e-08	0.000144206	FALSE	0.0177805	4.88816	0.840249	1	FALSE	-0.0257285	4.88819	0.929654	1	FALSE	1.88851	4.88818	6.24784e-18	8.26776e-14	FALSE	-1.01686	4.88822	1.29458e-06	0.0146611	FALSE	-0.805483	4.88795	0.00262115	1	FALSE
1	181998033	181999649	ZNF648	ENSG00000179930	24055	182023705	182030847	-	768	73	TRUE	0.944283	6.12158	1.66763e-11	2.16375e-07	TRUE	-0.204038	6.12169	0.123017	1	FALSE	0.499671	6.12162	6.58861e-06	0.0774096	FALSE	-0.129373	6.12165	0.343898	1	FALSE	-0.658307	6.12164	0.00561681	1	FALSE	-1.21338	6.1217	2.23053e-16	2.85062e-12	TRUE	-0.344229	6.12132	0.0800888	1	FALSE
1	182053979	182054452	RP11-538D16.3	ENSG00000225982	-1233	182055686	182059247	+	768	1	FALSE	-0.153897	4.13251	0.887592	1	FALSE	-0.017372	4.13251	1	1	FALSE	0.234737	4.13251	0.16785	1	FALSE	-0.0399624	4.13251	1	1	FALSE	-0.25762	4.13251	0.863726	1	FALSE	-0.0543753	4.13251	1	1	FALSE	-0.0278927	4.13252	1	1	FALSE
1	182331256	182332320	GLUL	ENSG00000135821	18518	182350839	182361341	-	768	1	FALSE	-0.00465906	4.16877	1	1	FALSE	-0.512337	4.16876	0.0122678	1	FALSE	0.0421267	4.16877	0.886781	1	FALSE	-0.338016	4.16876	0.179341	1	FALSE	-0.378894	4.16876	0.59812	1	FALSE	0.88022	4.16876	0.000166501	1	FALSE	-0.0805232	4.1688	0.814965	1	FALSE
1	182337079	182338524	GLUL	ENSG00000135821	12314	182350839	182361341	-	768	1	FALSE	0.738631	4.2437	0.00415847	1	FALSE	0.500258	4.24371	0.0169351	1	FALSE	-0.507398	4.2437	0.0269348	1	FALSE	-0.535128	4.24371	0.0284457	1	FALSE	-0.424926	4.24371	0.46733	1	FALSE	-0.243967	4.24371	0.328547	1	FALSE	0.179817	4.24369	0.609456	1	FALSE
1	182343087	182344453	GLUL	ENSG00000135821	6385	182350839	182361341	-	768	4	FALSE	0.865495	4.57042	0.000106022	1	FALSE	-0.157987	4.57044	0.46418	1	FALSE	-0.485026	4.57043	0.0163714	1	FALSE	-1.07808	4.57043	7.81561e-06	0.0900983	FALSE	0.0715183	4.57043	0.662442	1	FALSE	0.4843	4.57044	0.0185466	1	FALSE	0.359957	4.57036	0.222942	1	FALSE
1	182361842	182362061	GLUL	ENSG00000135821	-500	182350840	182361341	-	768	213	TRUE	0.97618	5.02681	5.76593e-09	7.27834e-05	TRUE	-0.482412	5.02695	0.00318997	1	FALSE	0.3768	5.02686	0.00433657	1	FALSE	-0.714956	5.0269	5.33648e-05	0.591496	FALSE	0.962273	5.02689	4.86808e-05	0.575309	FALSE	-0.823225	5.02697	5.46316e-06	0.0605865	FALSE	-0.378356	5.02647	0.128879	1	FALSE
1	182395459	182397589	RP1-223H12.5	ENSG00000270443	5438	182403028	182403596	-	768	0	FALSE	1.14487	4.34889	2.60861e-07	0.00319763	FALSE	-0.482581	4.34892	0.0209483	1	FALSE	0.0612223	4.3489	0.704487	1	FALSE	-0.812818	4.34891	0.00177955	1	FALSE	-0.649469	4.3489	0.206221	1	FALSE	0.49301	4.34892	0.0240731	1	FALSE	-0.826642	4.34881	0.0207789	1	FALSE
1	182558892	182559123	RNASEL	ENSG00000135828	-500	182547256	182558391	-	768	18	FALSE	0.661098	4.27729	0.00217736	1	FALSE	-0.262464	4.27732	0.246439	1	FALSE	-0.0995933	4.2773	0.707168	1	FALSE	-0.100434	4.27731	0.860481	1	FALSE	0.250205	4.2773	0.496284	1	FALSE	-0.0866541	4.27732	0.628401	1	FALSE	-0.204752	4.27722	0.54209	1	FALSE
1	182574044	182574069	RGS16	ENSG00000143333	-500	182567758	182573543	-	768	142	TRUE	-1.48773	4.6753	0.000512425	1	FALSE	-1.29031	4.67533	3.00872e-05	0.325393	FALSE	0.642113	4.67531	0.0142008	1	FALSE	1.24941	4.67532	7.50568e-06	0.086608	FALSE	-1.84689	4.67532	0.00649324	1	FALSE	-0.466343	4.67533	0.173281	1	FALSE	0.19551	4.67523	0.618052	1	FALSE
1	182580788	182581640	RP11-317P15.4	ENSG00000261504	-2748	182584389	182585764	+	768	10	FALSE	-0.425705	4.42776	0.203435	1	FALSE	-1.17872	4.4278	1.38872e-05	0.152828	FALSE	0.821524	4.42777	0.000231111	1	FALSE	0.692783	4.42779	0.00484335	1	FALSE	-1.63657	4.42778	0.00186972	1	FALSE	-0.254924	4.4278	0.449439	1	FALSE	-0.149853	4.42768	0.845647	1	FALSE
1	182583328	182583888	RP11-317P15.4	ENSG00000261504	-500	182584389	182585764	+	768	1	FALSE	0.140724	4.23694	0.773837	1	FALSE	-0.677704	4.23697	0.00308164	1	FALSE	0.142324	4.23695	0.518321	1	FALSE	0.347834	4.23696	0.0835714	1	FALSE	-0.970265	4.23696	0.0403865	1	FALSE	0.45056	4.23697	0.0428813	1	FALSE	-0.366427	4.23689	0.278784	1	FALSE
1	182595352	182595895	RP11-317P15.4	ENSG00000261504	9587	182584389	182585764	+	768	3	FALSE	-1.394	4.27785	0.0026263	1	FALSE	-1.31696	4.27783	6.6163e-05	0.70093	FALSE	1.45849	4.27784	1.16225e-06	0.0140005	FALSE	0.849366	4.27784	0.0141024	1	FALSE	-1.08748	4.27784	0.18435	1	FALSE	-1.01643	4.27783	0.0148878	1	FALSE	-0.95218	4.27789	0.0957505	1	FALSE
1	182598406	182599502	RP11-317P15.5	ENSG00000261185	11448	182610951	182612442	-	768	1	FALSE	-1.06042	4.2663	0.0362435	1	FALSE	-1.17393	4.26629	0.000846643	1	FALSE	2.37807	4.2663	1.3408e-16	1.78017e-12	FALSE	-1.20903	4.26629	0.0031281	1	FALSE	-1.51706	4.2663	0.0398773	1	FALSE	-1.11567	4.26629	0.00621242	1	FALSE	-0.542092	4.26632	0.45087	1	FALSE
1	182601406	182601890	RP11-317P15.5	ENSG00000261185	9060	182610951	182612442	-	768	2	FALSE	-0.500507	4.22126	0.140747	1	FALSE	-0.718528	4.22125	0.0114718	1	FALSE	1.24862	4.22125	1.72567e-07	0.00212689	FALSE	-0.330821	4.22125	0.376153	1	FALSE	-0.46534	4.22125	0.613331	1	FALSE	-0.327432	4.22125	0.360789	1	FALSE	-0.30927	4.22127	0.630769	1	FALSE
1	182602222	182604311	RP11-317P15.5	ENSG00000261185	6639	182610951	182612442	-	768	4	FALSE	-1.25995	4.53474	0.00433723	1	FALSE	-0.415488	4.53476	0.143488	1	FALSE	0.683378	4.53475	0.00849466	1	FALSE	0.445659	4.53476	0.131814	1	FALSE	-0.606171	4.53475	0.322101	1	FALSE	-0.217245	4.53477	0.553746	1	FALSE	-0.0265722	4.53468	1	1	FALSE
1	182807769	182808003	DHX9	ENSG00000135829	-500	182808504	182856886	+	768	584	TRUE	0.0108577	6.44513	0.859435	1	FALSE	-0.245592	6.44516	0.0038806	1	FALSE	0.386355	6.44515	1.49333e-06	0.0179334	FALSE	-0.230549	6.44516	0.0179746	1	FALSE	-0.193063	6.44515	0.261122	1	FALSE	0.134993	6.44517	0.154642	1	FALSE	-0.213689	6.44506	0.124205	1	FALSE
1	182931648	182932434	KRT18P28	ENSG00000176855	-2107	182928209	182929540	-	768	1	FALSE	0.538768	4.21333	0.0559017	1	FALSE	-0.51085	4.21336	0.0130828	1	FALSE	-0.24865	4.21334	0.411097	1	FALSE	-0.536917	4.21335	0.0114203	1	FALSE	-0.293364	4.21335	0.515966	1	FALSE	0.811168	4.21336	0.000106875	1	FALSE	0.119999	4.21328	0.638815	1	FALSE
1	182990864	182992094	LAMC1	ENSG00000135862	-500	182992595	183114727	+	768	578	TRUE	0.361953	7.68943	0.0184203	1	FALSE	-1.0326	7.68948	3.91206e-16	5.1295e-12	TRUE	-0.988323	7.68945	8.88669e-16	1.1766e-11	TRUE	-0.292789	7.68946	0.0353284	1	FALSE	-0.419591	7.68946	0.0862133	1	FALSE	1.66647	7.68948	8.84045e-53	1.184e-48	TRUE	-0.123501	7.68933	0.52701	1	FALSE
1	184019216	184020310	TSEN15	ENSG00000198860	-500	184020811	184043346	+	768	138	TRUE	1.03399	5.75171	2.34594e-12	3.06004e-08	TRUE	-1.44677	5.7518	1.52855e-24	2.04383e-20	TRUE	-0.0372377	5.75174	0.84436	1	FALSE	-0.0313259	5.75177	0.924062	1	FALSE	0.197422	5.75176	0.465341	1	FALSE	0.468913	5.75182	0.000858506	1	FALSE	-0.431999	5.75147	0.0461781	1	FALSE
1	184121516	184122640	Y_RNA	ENSG00000199840	18207	184140848	184140957	-	768	12	FALSE	-0.683409	4.53487	0.105202	1	FALSE	-1.1985	4.53481	0.000159795	1	FALSE	1.50102	4.53485	1.67335e-09	2.13068e-05	FALSE	0.0798308	4.53483	0.794428	1	FALSE	-1.6792	4.53484	0.0052533	1	FALSE	-0.994259	4.53481	0.004878	1	FALSE	0.278429	4.53502	0.395947	1	FALSE
1	184126599	184130916	Y_RNA	ENSG00000199840	9931	184140848	184140957	-	768	0	FALSE	0.700049	4.29353	0.0149016	1	FALSE	-0.868822	4.29356	0.00136499	1	FALSE	0.593909	4.29354	0.00434309	1	FALSE	-0.313723	4.29355	0.235525	1	FALSE	0.0821694	4.29355	0.723599	1	FALSE	-0.276359	4.29357	0.446183	1	FALSE	-0.337494	4.29343	0.612813	1	FALSE
1	184134726	184135363	Y_RNA	ENSG00000199840	5484	184140848	184140957	-	768	1	FALSE	0.135584	4.21518	0.853348	1	FALSE	-0.012864	4.21519	1	1	FALSE	-0.12572	4.21518	0.717442	1	FALSE	-0.220855	4.21519	0.625804	1	FALSE	-0.370087	4.21518	0.491388	1	FALSE	0.365434	4.21519	0.200303	1	FALSE	0.0903887	4.21515	0.919677	1	FALSE
1	184179920	184180827	Y_RNA	ENSG00000199840	-38962	184140848	184140957	-	768	0	FALSE	0.32273	4.12464	0.135186	1	FALSE	0.102903	4.12464	0.463098	1	FALSE	-0.107254	4.12464	0.709722	1	FALSE	-0.0681039	4.12464	1	1	FALSE	0.106114	4.12464	0.744892	1	FALSE	-0.164925	4.12465	0.450284	1	FALSE	-0.153475	4.12464	0.930494	1	FALSE
1	184191625	184192113	Y_RNA	ENSG00000199840	-50667	184140848	184140957	-	768	1	FALSE	0.00714609	4.1228	1	1	FALSE	-0.0505968	4.1228	1	1	FALSE	0.0123132	4.1228	1	1	FALSE	-0.0371334	4.1228	1	1	FALSE	0.125728	4.1228	0.611304	1	FALSE	0.0921853	4.1228	0.587247	1	FALSE	-0.12491	4.1228	1	1	FALSE
1	184269273	184270765	Y_RNA	ENSG00000207080	-14026	184284792	184284899	+	768	0	FALSE	-0.56585	4.16291	0.0643396	1	FALSE	-0.00959361	4.16292	0.841436	1	FALSE	0.357995	4.16292	0.0755742	1	FALSE	-0.0641802	4.16292	1	1	FALSE	-0.0182675	4.16292	0.880117	1	FALSE	0.0197874	4.16292	1	1	FALSE	-0.146386	4.16289	0.918589	1	FALSE
1	184271310	184272076	Y_RNA	ENSG00000207080	-12715	184284792	184284899	+	768	1	FALSE	0.311117	4.13766	0.173899	1	FALSE	0.0852095	4.13766	0.638482	1	FALSE	0.0819277	4.13766	0.783606	1	FALSE	-0.195753	4.13766	0.568245	1	FALSE	-0.350296	4.13766	0.643154	1	FALSE	-0.0623184	4.13766	1	1	FALSE	-0.178594	4.13765	0.907451	1	FALSE
1	184328600	184330297	RN7SL654P	ENSG00000244568	23518	184304792	184305081	+	768	62	TRUE	2.19405	5.64797	3.01411e-14	3.96748e-10	TRUE	-3.15702	5.64802	1.10203e-21	1.46812e-17	TRUE	0.41298	5.64799	0.107117	1	FALSE	-0.795281	5.64801	0.0190772	1	FALSE	-1.60871	5.648	0.0130496	1	FALSE	0.0692814	5.64803	0.797572	1	FALSE	-0.847593	5.64784	0.0785796	1	FALSE
1	184617420	184619697	C1orf21	ENSG00000116667	19265	184356192	184598154	+	768	133	TRUE	1.26978	6.52888	2.95156e-08	0.000368413	TRUE	-1.04803	6.52892	1.14269e-06	0.0131456	FALSE	0.779685	6.5289	2.11905e-05	0.243479	FALSE	-1.30005	6.52891	1.15765e-07	0.00140771	TRUE	-1.12879	6.52891	0.0102115	1	FALSE	0.222945	6.52893	0.306366	1	FALSE	-0.905761	6.52878	0.00630762	1	FALSE
1	184633062	184633688	SNORD112	ENSG00000252790	-13379	184647068	184647141	+	768	67	TRUE	1.73644	5.38582	6.46195e-10	8.25514e-06	TRUE	-0.667823	5.38595	0.0144	1	FALSE	0.838837	5.38587	0.00037481	1	FALSE	-2.03855	5.38591	1.52682e-09	1.91753e-05	TRUE	-0.527226	5.38589	0.38461	1	FALSE	-0.758426	5.38597	0.0177408	1	FALSE	-1.28026	5.38549	0.00610817	1	FALSE
1	184634514	184635769	SNORD112	ENSG00000252790	-11298	184647068	184647141	+	768	64	TRUE	1.17439	5.43077	6.10277e-06	0.0721103	FALSE	-0.798052	5.43087	0.000923431	1	FALSE	0.815999	5.43081	7.40745e-05	0.830005	FALSE	-1.74877	5.43084	1.0488e-09	1.31991e-05	TRUE	-0.280644	5.43083	0.618779	1	FALSE	0.144141	5.43089	0.545762	1	FALSE	-1.1467	5.43051	0.00371215	1	FALSE
1	184653147	184654364	EDEM3	ENSG00000116406	5000	184659365	184724047	-	768	35	FALSE	1.91673	5.02827	1.46848e-20	1.95777e-16	FALSE	-1.24317	5.02836	6.96074e-08	0.00083146	FALSE	0.243205	5.0283	0.201336	1	FALSE	-0.991435	5.02833	6.63079e-05	0.730845	FALSE	1.07519	5.02832	0.00085297	1	FALSE	-1.10809	5.02837	1.41695e-05	0.154972	FALSE	-1.00225	5.02806	0.00681302	1	FALSE
1	184724548	184725668	EDEM3	ENSG00000116406	-500	184659365	184724047	-	768	155	TRUE	0.89313	5.60487	1.99561e-07	0.0024524	TRUE	-1.28902	5.60498	1.62087e-15	2.11865e-11	TRUE	-0.403822	5.60491	0.00723576	1	FALSE	-0.152663	5.60494	0.370553	1	FALSE	1.30285	5.60493	8.28733e-09	0.00010568	TRUE	0.11599	5.605	0.444172	1	FALSE	0.267012	5.60459	0.197301	1	FALSE
1	184944183	184944289	FAM129A	ENSG00000135842	-500	184760164	184943682	-	768	111	TRUE	0.431644	4.45485	0.121288	1	FALSE	-0.571182	4.45489	0.0143757	1	FALSE	-1.04153	4.45487	1.13134e-05	0.131586	FALSE	0.746888	4.45488	0.00102865	1	FALSE	-0.0143461	4.45488	0.852149	1	FALSE	0.432273	4.4549	0.0923383	1	FALSE	0.00319303	4.45476	0.950904	1	FALSE
1	185013987	185013995	RNF2	ENSG00000121481	-500	185014496	185071740	+	768	98	TRUE	0.526134	4.14283	0.0560149	1	FALSE	-0.222363	4.14284	0.522572	1	FALSE	-0.145042	4.14283	0.707169	1	FALSE	-0.260134	4.14284	0.619721	1	FALSE	0.328045	4.14284	0.361683	1	FALSE	-0.0187855	4.14284	1	1	FALSE	0.166979	4.1428	0.812814	1	FALSE
1	185307979	185309122	GS1-279B7.1	ENSG00000261024	-3807	185300389	185304171	-	768	0	FALSE	0.415058	4.29421	0.113334	1	FALSE	-0.901204	4.29424	6.2304e-06	0.0696808	FALSE	-0.0936638	4.29422	0.573464	1	FALSE	0.287203	4.29423	0.0842473	1	FALSE	0.133683	4.29422	0.492045	1	FALSE	0.152024	4.29424	0.339806	1	FALSE	0.190711	4.29415	0.553354	1	FALSE
1	185344982	185346351	GS1-279B7.1	ENSG00000261024	-40810	185300389	185304171	-	768	138	TRUE	-0.240555	6.4252	0.261922	1	FALSE	-1.77019	6.42516	4.42816e-24	5.91957e-20	TRUE	-0.668172	6.42518	2.80417e-05	0.320601	FALSE	-0.359127	6.42517	0.0585057	1	FALSE	0.16207	6.42518	0.54594	1	FALSE	0.201671	6.42515	0.259626	1	FALSE	2.36903	6.4253	1.40799e-43	1.89403e-39	TRUE
1	185366857	185368129	RNU7-183P	ENSG00000252407	-35246	185403376	185403437	+	768	0	FALSE	0.489962	4.15184	0.206844	1	FALSE	-0.413289	4.15185	0.0621255	1	FALSE	-0.079885	4.15185	1	1	FALSE	-0.371511	4.15185	0.0934163	1	FALSE	0.380594	4.15185	0.233562	1	FALSE	0.0402499	4.15185	1	1	FALSE	0.429973	4.15182	0.157691	1	FALSE
1	185662783	185664216	GS1-204I12.4	ENSG00000261729	36482	185624134	185626300	+	768	8	FALSE	2.00804	4.36976	1.96003e-20	2.61233e-16	FALSE	-1.20449	4.36986	4.76034e-06	0.0535348	FALSE	-0.58612	4.3698	0.0146866	1	FALSE	-0.974348	4.36983	0.000358589	1	FALSE	0.754868	4.36982	0.0478387	1	FALSE	-8.09327e-05	4.36988	0.978083	1	FALSE	-0.634809	4.36952	0.155599	1	FALSE
1	185703178	185703182	HMCN1	ENSG00000143341	-500	185703683	186160081	+	768	52	TRUE	0.121762	4.11606	0.21875	1	FALSE	-0.018527	4.11606	1	1	FALSE	-0.0193445	4.11606	1	1	FALSE	-0.0179955	4.11606	1	1	FALSE	-0.0158411	4.11606	1	1	FALSE	-0.0174161	4.11606	1	1	FALSE	-0.0161732	4.11606	1	1	FALSE
1	186187949	186188348	HMCN1	ENSG00000143341	27863	185703683	186160085	+	768	1	FALSE	0.157154	4.13043	0.455344	1	FALSE	-0.204937	4.13044	0.310101	1	FALSE	-0.297559	4.13043	0.0490685	1	FALSE	0.425759	4.13044	0.0172827	1	FALSE	-0.120743	4.13044	0.951618	1	FALSE	0.170674	4.13044	0.395615	1	FALSE	-0.251068	4.13042	0.591543	1	FALSE
1	186395511	186395729	C1orf27	ENSG00000157181	5000	186345001	186390510	+	768	176	TRUE	-0.0625289	4.83756	0.861247	1	FALSE	-0.0881432	4.83757	0.564616	1	FALSE	0.234824	4.83756	0.0959184	1	FALSE	-0.0339859	4.83757	0.946046	1	FALSE	0.849641	4.83757	0.00015665	1	FALSE	-0.528128	4.83758	0.00383528	1	FALSE	-0.248227	4.83752	0.288429	1	FALSE
1	186449540	186449918	PDC	ENSG00000116703	-19285	186412698	186430254	-	768	9	FALSE	-0.198391	4.18047	0.829547	1	FALSE	-0.137212	4.18047	0.480027	1	FALSE	0.200945	4.18047	0.495406	1	FALSE	-0.120436	4.18047	0.972614	1	FALSE	0.795179	4.18047	0.0162391	1	FALSE	-0.247358	4.18048	0.615127	1	FALSE	-0.108626	4.18046	0.742183	1	FALSE
1	186480983	186481982	GS1-304P7.3	ENSG00000273198	-8922	186490905	186491436	+	768	1	FALSE	-0.0382993	4.46805	0.909631	1	FALSE	-0.726901	4.46809	0.000144702	1	FALSE	0.512869	4.46806	0.000518669	1	FALSE	-0.71126	4.46808	0.000340706	1	FALSE	0.705379	4.46807	0.0136012	1	FALSE	0.503906	4.4681	0.00509998	1	FALSE	-0.480063	4.46794	0.0830145	1	FALSE
1	186533188	186534084	GS1-304P7.2	ENSG00000228238	-13326	186547411	186548431	+	768	1	FALSE	-0.305404	4.45816	0.180689	1	FALSE	0.060307	4.45819	0.808057	1	FALSE	0.62103	4.45817	2.72326e-05	0.311596	FALSE	-0.520407	4.45818	0.0159088	1	FALSE	0.49396	4.45818	0.0757696	1	FALSE	-0.474584	4.45819	0.0147624	1	FALSE	-0.2182	4.45808	0.32806	1	FALSE
1	186574834	186575693	GS1-304P7.1	ENSG00000233196	-24510	186549647	186550323	-	768	2	FALSE	0.0483273	4.28515	1	1	FALSE	-0.0533385	4.28517	0.910595	1	FALSE	0.706881	4.28515	0.000221812	1	FALSE	-0.681087	4.28516	0.0100147	1	FALSE	0.316469	4.28516	0.286696	1	FALSE	-0.21925	4.28517	0.514187	1	FALSE	-0.869725	4.2851	0.00522066	1	FALSE
1	186586768	186588187	GS1-304P7.1	ENSG00000233196	-36444	186549647	186550323	-	768	35	FALSE	-0.25776	4.99994	0.238217	1	FALSE	-0.745909	5.00002	6.33246e-05	0.67143	FALSE	0.0453634	4.99997	0.802877	1	FALSE	-0.0861218	5	0.816457	1	FALSE	0.320071	4.99999	0.330178	1	FALSE	-0.431236	5.00004	0.0285834	1	FALSE	1.47181	4.99973	3.31174e-12	4.43938e-08	FALSE
1	186595196	186596766	PTGS2	ENSG00000073756	44156	186640923	186649559	-	768	17	FALSE	-0.366305	4.93972	0.111265	1	FALSE	-0.885932	4.93982	2.8824e-06	0.0326605	FALSE	0.237407	4.93975	0.139999	1	FALSE	0.859191	4.93979	5.64534e-07	0.00675296	FALSE	-0.267568	4.93978	0.479062	1	FALSE	-0.178851	4.93983	0.329192	1	FALSE	-0.00257584	4.93948	0.914212	1	FALSE
1	186723342	186724440	RP5-973M2.2	ENSG00000273129	72763	186649754	186650578	+	768	14	FALSE	0.382925	4.364	0.206468	1	FALSE	-0.713147	4.36402	0.00484017	1	FALSE	0.140498	4.36401	0.53368	1	FALSE	-0.111581	4.36401	0.898431	1	FALSE	-1.33127	4.36401	0.0173937	1	FALSE	0.748242	4.36403	0.00379332	1	FALSE	-0.381982	4.36393	0.336348	1	FALSE
1	186729385	186731267	PLA2G4A	ENSG00000116711	-66817	186798085	186958113	+	768	1	FALSE	1.55966	4.34428	2.28097e-12	2.97553e-08	FALSE	-0.029078	4.34437	0.92758	1	FALSE	-0.0865196	4.34431	0.744517	1	FALSE	-0.835382	4.34434	0.00423014	1	FALSE	-0.824186	4.34433	0.108299	1	FALSE	-0.691546	4.34438	0.0107528	1	FALSE	-0.395994	4.34405	0.361684	1	FALSE
1	186736675	186742438	PLA2G4A	ENSG00000116711	-55646	186798085	186958113	+	768	9	FALSE	0.471535	5.41516	0.0182711	1	FALSE	-0.457338	5.41532	0.00827915	1	FALSE	0.540674	5.41522	0.000200374	1	FALSE	0.0393242	5.41527	0.773544	1	FALSE	0.0353432	5.41525	0.89278	1	FALSE	-0.778512	5.41534	8.39368e-05	0.884023	FALSE	-0.220462	5.41479	0.357945	1	FALSE
1	186748109	186749634	PLA2G4A	ENSG00000116711	-48450	186798085	186958113	+	768	0	FALSE	0.191409	4.20179	0.565845	1	FALSE	-0.199337	4.20181	0.5433	1	FALSE	0.570628	4.2018	0.00977832	1	FALSE	-0.442982	4.20181	0.159663	1	FALSE	0.0575195	4.2018	0.892852	1	FALSE	-0.463358	4.20182	0.124201	1	FALSE	-0.0190023	4.20174	1	1	FALSE
1	186767539	186771294	PLA2G4A	ENSG00000116711	-26790	186798085	186958113	+	768	569	TRUE	0.578038	9.93965	0.00242399	1	FALSE	-0.546356	9.93965	0.000736845	1	FALSE	0.691703	9.93965	1.37916e-06	0.016583	FALSE	0.508158	9.93965	0.00191174	1	FALSE	-1.63788	9.93965	1.4628e-06	0.0180495	FALSE	-1.80732	9.93966	3.26286e-20	4.24041e-16	TRUE	0.0017121	9.93963	0.960018	1	FALSE
1	186787365	186789670	PLA2G4A	ENSG00000116711	-8414	186798085	186958113	+	768	1	FALSE	0.954881	4.48824	6.0133e-06	0.0710771	FALSE	-0.951191	4.48831	6.28453e-06	0.070261	FALSE	0.580609	4.48826	0.000477281	1	FALSE	-0.587791	4.48829	0.0106544	1	FALSE	-0.0490347	4.48828	0.969743	1	FALSE	-0.26109	4.48832	0.250534	1	FALSE	-0.182065	4.48807	0.567911	1	FALSE
1	187001202	187002852	PLA2G4A	ENSG00000116711	43088	186798085	186958113	+	768	31	FALSE	-2.10538	4.97621	3.4756e-05	0.397539	FALSE	-1.72521	4.97627	1.27335e-06	0.0146244	FALSE	-1.58569	4.97623	2.52807e-06	0.0301473	FALSE	-2.82943	4.97625	3.26316e-11	4.17521e-07	FALSE	5.21628	4.97624	2.18595e-86	2.93813e-82	FALSE	-0.802343	4.97628	0.0448687	1	FALSE	-2.2413	4.97606	0.000181809	1	FALSE
1	187020712	187021426	LINC01036	ENSG00000236030	-40547	187061974	187329455	+	768	14	FALSE	-0.388337	4.31815	0.351935	1	FALSE	-0.775581	4.31818	0.00675836	1	FALSE	-0.784341	4.31816	0.00321421	1	FALSE	-1.31118	4.31817	2.60692e-05	0.293618	FALSE	3.78699	4.31817	7.96915e-61	1.06922e-56	FALSE	-1.11734	4.31818	0.000474479	1	FALSE	-0.804187	4.31806	0.0741346	1	FALSE
1	187041460	187042845	LINC01036	ENSG00000236030	-19128	187061974	187329455	+	768	483	TRUE	0.301634	10.2966	0.283495	1	FALSE	-0.915428	10.2966	0.000226609	1	FALSE	0.765677	10.2966	0.000332691	1	FALSE	-1.34526	10.2966	2.48982e-06	0.0292479	FALSE	1.5466	10.2966	1.43645e-05	0.172962	FALSE	-0.164929	10.2966	0.564781	1	FALSE	-0.430511	10.2966	0.260846	1	FALSE
1	187956420	187956958	RP11-134C1.1	ENSG00000150732	79470	188036429	188036656	-	768	1	FALSE	0.173182	4.12187	0.277396	1	FALSE	0.0542846	4.12187	0.747456	1	FALSE	0.0883776	4.12187	0.418161	1	FALSE	-0.119014	4.12187	0.711771	1	FALSE	-0.105095	4.12187	1	1	FALSE	-0.116449	4.12187	0.759751	1	FALSE	-0.107932	4.12186	1	1	FALSE
1	188332805	188333388	RP11-405P11.1	ENSG00000224278	-120995	188211270	188211809	-	768	7	FALSE	0.991396	4.40371	0.000321871	1	FALSE	-0.439172	4.40377	0.0965051	1	FALSE	0.709752	4.40373	0.00117468	1	FALSE	-0.114101	4.40375	0.748689	1	FALSE	-1.781	4.40374	0.00298716	1	FALSE	-1.24828	4.40378	1.62406e-05	0.177071	FALSE	-0.279736	4.40357	0.554815	1	FALSE
1	188751350	188751887	RP11-316I3.1	ENSG00000237283	-71338	188674754	188680011	-	768	57	TRUE	-3.45371	5.47497	1.20255e-07	0.00148539	TRUE	-2.52312	5.47485	2.62489e-08	0.00031685	TRUE	0.667505	5.47492	0.0613219	1	FALSE	0.658836	5.47488	0.0938309	1	FALSE	2.34689	5.4749	1.69232e-05	0.203316	FALSE	-0.0463905	5.47483	0.977685	1	FALSE	-1.59696	5.47527	0.0216514	1	FALSE
1	189109952	189111041	RP11-373J16.2	ENSG00000226196	-7528	189101481	189102423	-	768	210	TRUE	-2.09316	7.50584	1.69508e-06	0.0203715	FALSE	-1.99246	7.50588	3.01157e-10	3.77019e-06	TRUE	-0.187646	7.50585	0.517582	1	FALSE	1.30354	7.50587	2.19546e-06	0.0258384	FALSE	0.130265	7.50586	0.716809	1	FALSE	0.583069	7.50588	0.0479004	1	FALSE	0.446117	7.50575	0.233526	1	FALSE
1	189118612	189126116	RP11-373J16.2	ENSG00000226196	-16188	189101481	189102423	-	768	503	TRUE	-0.11645	10.4875	0.651249	1	FALSE	-0.798308	10.4875	2.22615e-05	0.242361	FALSE	0.350652	10.4875	0.0367719	1	FALSE	-0.204724	10.4875	0.323843	1	FALSE	0.527199	10.4875	0.080963	1	FALSE	-0.168512	10.4875	0.430323	1	FALSE	0.794587	10.4875	0.00100398	1	FALSE
1	189126769	189131447	RP11-373J16.2	ENSG00000226196	-24345	189101481	189102423	-	768	262	TRUE	-0.476895	8.75612	0.0941678	1	FALSE	-0.987	8.75615	5.53725e-06	0.0620892	FALSE	0.0317109	8.75613	0.852936	1	FALSE	-0.489046	8.75614	0.0403901	1	FALSE	1.28272	8.75614	6.89738e-05	0.809959	FALSE	0.341519	8.75615	0.119665	1	FALSE	0.893671	8.75605	0.0010385	1	FALSE
1	189133659	189135269	RP11-373J16.2	ENSG00000226196	-31235	189101481	189102423	-	768	186	TRUE	0.507627	6.72213	0.0431874	1	FALSE	-0.524547	6.72223	0.0146525	1	FALSE	-0.0690116	6.72216	0.759926	1	FALSE	-0.803087	6.7222	0.0011268	1	FALSE	0.153661	6.72219	0.626207	1	FALSE	0.181491	6.72225	0.412745	1	FALSE	0.924571	6.72187	0.000766654	1	FALSE
1	189148126	189149929	RP11-373J16.2	ENSG00000226196	-45702	189101481	189102423	-	768	198	TRUE	0.575458	6.86392	0.0132248	1	FALSE	-0.732953	6.86401	0.000269636	1	FALSE	0.22751	6.86395	0.19975	1	FALSE	-0.468925	6.86398	0.03748	1	FALSE	0.102966	6.86397	0.71515	1	FALSE	-0.0930062	6.86403	0.689747	1	FALSE	0.659748	6.86369	0.0117407	1	FALSE
1	189181630	189182867	RP11-373J16.2	ENSG00000226196	-79206	189101481	189102423	-	768	144	TRUE	0.179961	6.20822	0.459164	1	FALSE	-0.884653	6.20835	2.11422e-05	0.230619	FALSE	0.675363	6.20827	0.000154866	1	FALSE	-0.641046	6.20831	0.00515183	1	FALSE	0.193017	6.2083	0.543367	1	FALSE	-0.382484	6.20837	0.10195	1	FALSE	0.829557	6.20792	0.00156858	1	FALSE
1	189222849	189223448	RP11-373J16.2	ENSG00000226196	-120425	189101481	189102423	-	768	102	TRUE	0.275518	5.20517	0.285925	1	FALSE	-0.700459	5.20527	0.00108366	1	FALSE	0.547412	5.2052	0.00319895	1	FALSE	-0.72132	5.20524	0.00332142	1	FALSE	0.200889	5.20523	0.550592	1	FALSE	-0.46067	5.20528	0.0654211	1	FALSE	0.908199	5.20491	0.000817285	1	FALSE
1	189299823	189300538	RP11-373J16.2	ENSG00000226196	-197399	189101481	189102423	-	768	63	TRUE	0.0488738	5.06811	0.85229	1	FALSE	-0.615857	5.0682	0.00111118	1	FALSE	0.524477	5.06814	0.0016784	1	FALSE	-0.363627	5.06817	0.109573	1	FALSE	-0.721663	5.06816	0.0621488	1	FALSE	-0.0688619	5.06821	0.823569	1	FALSE	0.702897	5.0679	0.00559871	1	FALSE
1	189316310	189319943	RP11-373J16.2	ENSG00000226196	-213886	189101481	189102423	-	768	55	TRUE	0.161277	6.50664	0.471731	1	FALSE	-0.683297	6.50673	0.000264964	1	FALSE	0.392356	6.50668	0.0177168	1	FALSE	-0.0940079	6.50671	0.682004	1	FALSE	-0.516559	6.5067	0.160389	1	FALSE	-0.399501	6.50675	0.0577878	1	FALSE	0.90341	6.50642	0.000149762	1	FALSE
1	189320184	189321602	RP11-373J16.2	ENSG00000226196	-217760	189101481	189102423	-	768	164	TRUE	0.161456	6.02328	0.488605	1	FALSE	-0.624858	6.02338	0.0011101	1	FALSE	0.340096	6.02332	0.0431187	1	FALSE	-0.0746243	6.02335	0.758477	1	FALSE	-0.563477	6.02334	0.137323	1	FALSE	-0.293328	6.0234	0.177365	1	FALSE	0.822749	6.02303	0.000831098	1	FALSE
1	189723582	189724885	RP11-398M15.1	ENSG00000232212	-19709	189744595	189784048	+	768	111	TRUE	1.30507	5.7818	4.75763e-09	6.0127e-05	TRUE	-1.38693	5.78186	1.35466e-10	1.70416e-06	TRUE	0.645597	5.78182	0.000412349	1	FALSE	-0.101676	5.78184	0.706394	1	FALSE	-0.63514	5.78183	0.129176	1	FALSE	-0.972268	5.78187	6.28772e-05	0.667065	FALSE	0.0253168	5.78166	0.904152	1	FALSE
1	189807764	189808183	RP11-398M15.1	ENSG00000232212	23715	189744595	189784048	+	768	2	FALSE	-0.274854	4.27998	0.402413	1	FALSE	0.467522	4.28001	0.02795	1	FALSE	-0.21266	4.27999	0.423206	1	FALSE	0.217685	4.28	0.306209	1	FALSE	-0.494286	4.28	0.364413	1	FALSE	-0.0809518	4.28002	0.679173	1	FALSE	-0.339608	4.27991	0.296369	1	FALSE
1	189988388	189989714	RP11-113I24.1	ENSG00000230987	-26160	189958700	189962227	-	768	46	TRUE	1.37361	5.12088	2.1272e-06	0.0255031	FALSE	-1.88981	5.121	1.31095e-10	1.64944e-06	TRUE	0.00821207	5.12093	0.959254	1	FALSE	0.039853	5.12096	0.851356	1	FALSE	0.156206	5.12095	0.6599	1	FALSE	0.155045	5.12101	0.564796	1	FALSE	-0.316056	5.12061	0.454144	1	FALSE
1	190548567	190549637	RP11-463J7.2	ENSG00000231175	-44382	190594020	190770788	+	768	0	FALSE	0.0554889	4.11882	0.741602	1	FALSE	-0.0904659	4.11882	0.977736	1	FALSE	-0.0943559	4.11882	0.916055	1	FALSE	0.0136985	4.11882	1	1	FALSE	-0.0776269	4.11882	1	1	FALSE	0.141797	4.11882	0.78747	1	FALSE	0.115612	4.11881	0.579805	1	FALSE
1	191104026	191104330	HNRNPA1P46	ENSG00000228020	10824	191115155	191116091	-	768	1	FALSE	-0.0838499	4.15426	0.805243	1	FALSE	-0.40522	4.15426	0.0561092	1	FALSE	0.309694	4.15426	0.111763	1	FALSE	0.106316	4.15426	0.60602	1	FALSE	-0.343192	4.15426	0.838396	1	FALSE	-0.0651933	4.15427	1	1	FALSE	0.229724	4.15423	0.794788	1	FALSE
1	191142595	191143650	RP11-309H21.4	ENSG00000271187	5000	191148651	191148869	-	768	1	FALSE	0.510966	4.17572	0.0448769	1	FALSE	-0.371291	4.17575	0.124633	1	FALSE	0.0626156	4.17573	0.74041	1	FALSE	0.169012	4.17574	0.486272	1	FALSE	0.577588	4.17574	0.218418	1	FALSE	-0.340123	4.17576	0.263873	1	FALSE	-0.735334	4.17565	0.0666172	1	FALSE
1	191222560	191223408	RP11-309H21.2	ENSG00000233882	-24962	191190289	191197597	-	768	1	FALSE	1.5542	4.24312	1.51409e-08	0.000189776	FALSE	-0.739348	4.24315	0.00704026	1	FALSE	0.2837	4.24313	0.259675	1	FALSE	-1.06015	4.24314	0.000236777	1	FALSE	-0.185109	4.24314	0.832996	1	FALSE	-0.851627	4.24315	0.00402984	1	FALSE	0.365826	4.24305	0.271448	1	FALSE
1	191550839	191551814	RP11-541F9.1	ENSG00000223344	276022	191827837	191836090	-	768	1	FALSE	-0.317508	4.16382	0.465577	1	FALSE	-0.30666	4.16382	0.210637	1	FALSE	0.474991	4.16382	0.0139875	1	FALSE	0.246052	4.16382	0.229217	1	FALSE	-0.365443	4.16382	0.630831	1	FALSE	0.0357782	4.16382	0.958303	1	FALSE	-0.678445	4.16381	0.0506272	1	FALSE
1	191637656	191638317	RP11-541F9.1	ENSG00000223344	189519	191827837	191836090	-	768	1	FALSE	-0.264924	4.15449	0.730148	1	FALSE	-0.232064	4.1545	0.284791	1	FALSE	0.0378642	4.15449	0.934229	1	FALSE	-0.0938062	4.1545	0.754724	1	FALSE	-0.348776	4.1545	0.833388	1	FALSE	0.536616	4.15451	0.014359	1	FALSE	0.0183054	4.15444	1	1	FALSE
1	191664482	191665551	RP11-541F9.1	ENSG00000223344	162285	191827837	191836090	-	768	0	FALSE	-0.0300943	4.1382	0.992684	1	FALSE	-0.187234	4.1382	0.500239	1	FALSE	0.101986	4.1382	0.525116	1	FALSE	0.165244	4.1382	0.31953	1	FALSE	0.574208	4.1382	0.218329	1	FALSE	-0.306347	4.1382	0.224673	1	FALSE	-0.198379	4.13818	0.855021	1	FALSE
1	192370855	192371378	RGS21	ENSG00000253148	34439	192286122	192336415	+	768	3	FALSE	-0.791516	4.19752	0.0378175	1	FALSE	-0.380178	4.19752	0.216584	1	FALSE	1.14776	4.19752	4.36653e-07	0.00533154	FALSE	-0.171915	4.19752	0.717179	1	FALSE	-0.477288	4.19752	0.584934	1	FALSE	-0.493784	4.19752	0.123435	1	FALSE	-0.377801	4.1975	0.536751	1	FALSE
1	192445719	192446606	AL136987.1	ENSG00000221145	13651	192460258	192460350	-	768	33	FALSE	0.39109	4.89517	0.270568	1	FALSE	-0.0603953	4.89531	0.867757	1	FALSE	1.19015	4.89522	1.40776e-05	0.163286	FALSE	-2.15055	4.89527	5.78648e-08	0.00070867	FALSE	-0.623016	4.89525	0.367752	1	FALSE	-0.4635	4.89533	0.23577	1	FALSE	-0.560119	4.89481	0.29529	1	FALSE
1	192481504	192481768	RP5-1011O1.2	ENSG00000232498	5000	192486769	192536347	-	768	68	TRUE	-1.32231	4.69102	0.00176917	1	FALSE	0.933764	4.69099	0.000421431	1	FALSE	-0.174359	4.69101	0.542079	1	FALSE	0.586251	4.691	0.0464664	1	FALSE	0.256201	4.691	0.538316	1	FALSE	-1.04179	4.69098	0.00269539	1	FALSE	-1.18921	4.69109	0.030083	1	FALSE
1	192543751	192544356	RGS1	ENSG00000090104	-500	192544857	192549161	+	768	51	TRUE	-0.878483	4.71348	0.00388081	1	FALSE	-0.0834309	4.71358	0.720475	1	FALSE	-1.29259	4.71352	4.18276e-09	5.29705e-05	TRUE	1.01209	4.71355	2.87231e-07	0.00345883	TRUE	1.61016	4.71354	2.72905e-08	0.000345852	TRUE	-0.704229	4.7136	0.0026256	1	FALSE	0.260208	4.71324	0.387159	1	FALSE
1	192561560	192562372	RGS1	ENSG00000090104	12398	192544857	192549161	+	768	38	FALSE	-0.702306	4.84725	0.0380745	1	FALSE	0.137439	4.84726	0.565737	1	FALSE	-1.50432	4.84725	1.20963e-09	1.54373e-05	FALSE	1.26869	4.84725	2.10254e-08	0.000259706	FALSE	0.975068	4.84725	0.00888028	1	FALSE	-0.368247	4.84726	0.179462	1	FALSE	-0.23893	4.84725	0.545087	1	FALSE
1	192574159	192575673	RGS1	ENSG00000090104	24997	192544857	192549161	+	768	16	FALSE	0.0676663	4.78301	0.837785	1	FALSE	0.0847319	4.78308	0.670686	1	FALSE	-1.46406	4.78303	5.29304e-11	6.84443e-07	FALSE	-0.0237723	4.78306	0.977236	1	FALSE	0.0676268	4.78305	0.884307	1	FALSE	0.335929	4.78309	0.134455	1	FALSE	1.18604	4.78284	1.69584e-05	0.224495	FALSE
1	192577473	192579349	RGS13	ENSG00000127074	-25925	192605275	192629390	+	768	231	TRUE	-1.13685	7.39542	2.34536e-05	0.270655	FALSE	0.801982	7.39543	3.39046e-06	0.0383257	FALSE	-1.32418	7.39543	4.67045e-12	6.08466e-08	TRUE	-0.548779	7.39543	0.0104182	1	FALSE	1.18119	7.39543	6.37694e-05	0.749673	FALSE	0.414676	7.39544	0.0383832	1	FALSE	0.338161	7.39539	0.187906	1	FALSE
1	192595038	192596499	RGS13	ENSG00000127074	-8775	192605275	192629390	+	768	91	TRUE	-1.27278	6.3738	0.000150033	1	FALSE	0.759464	6.37378	0.000276055	1	FALSE	-1.13312	6.37379	1.00288e-06	0.0121038	FALSE	1.04748	6.37378	2.70982e-06	0.0317727	FALSE	1.16167	6.37379	0.00100896	1	FALSE	-1.53749	6.37377	3.53816e-08	0.000418069	TRUE	-0.320891	6.37385	0.379351	1	FALSE
1	192596755	192599151	RGS13	ENSG00000127074	-6123	192605275	192629390	+	768	120	TRUE	-1.22854	6.39757	0.000494153	1	FALSE	0.868999	6.39753	7.12578e-05	0.753267	FALSE	-1.43265	6.39755	7.34709e-09	9.26688e-05	TRUE	1.07796	6.39754	4.52652e-06	0.052666	FALSE	1.08124	6.39755	0.00397422	1	FALSE	-1.54354	6.39753	1.95247e-07	0.00226428	TRUE	-0.246064	6.39765	0.538083	1	FALSE
1	192599206	192604774	RGS13	ENSG00000127074	-500	192605275	192629390	+	768	109	TRUE	-1.35294	7.0526	8.56072e-06	0.100614	FALSE	0.439699	7.05264	0.0248296	1	FALSE	-1.52786	7.05262	1.71428e-12	2.24022e-08	TRUE	0.0174152	7.05263	0.914701	1	FALSE	2.1399	7.05263	1.87939e-13	2.46125e-09	TRUE	-0.153447	7.05265	0.529929	1	FALSE	0.267033	7.05249	0.340189	1	FALSE
1	192672329	192673501	MIR4426	ENSG00000231767	-11811	192685313	192685778	+	768	13	FALSE	-1.51894	4.62584	2.55032e-05	0.293695	FALSE	0.368073	4.62587	0.116734	1	FALSE	-1.01472	4.62585	6.41855e-05	0.722087	FALSE	0.938083	4.62586	5.06322e-05	0.561916	FALSE	1.51487	4.62586	1.4305e-05	0.172261	FALSE	-0.656778	4.62587	0.0183668	1	FALSE	-0.443729	4.62576	0.233718	1	FALSE
1	192710294	192712438	MIR4426	ENSG00000231767	24510	192685313	192685783	+	768	295	TRUE	-0.955164	8.61806	0.0081852	1	FALSE	1.56781	8.61806	1.06059e-12	1.36328e-08	TRUE	-0.0234397	8.61806	0.946475	1	FALSE	-1.14877	8.61806	0.000140599	1	FALSE	-0.342329	8.61806	0.537955	1	FALSE	-0.857909	8.61806	0.00488175	1	FALSE	-0.53602	8.61807	0.191081	1	FALSE
1	192775311	192777668	RGS2	ENSG00000116741	-500	192778169	192780029	+	768	485	TRUE	-0.0722533	7.94222	0.684744	1	FALSE	0.552303	7.94225	7.22753e-07	0.0083796	FALSE	-0.70515	7.94223	2.47153e-09	3.14082e-05	TRUE	0.21611	7.94224	0.0883458	1	FALSE	0.545327	7.94224	0.00727088	1	FALSE	-0.797966	7.94225	7.6523e-09	9.16593e-05	TRUE	0.421013	7.94215	0.0111072	1	FALSE
1	192854045	192855425	RN7SKP126	ENSG00000223075	-8929	192844816	192845115	-	768	0	FALSE	-0.302247	4.32755	0.190134	1	FALSE	-0.562126	4.32756	0.00392194	1	FALSE	0.936833	4.32755	1.09253e-09	1.3956e-05	FALSE	-0.521893	4.32756	0.0199305	1	FALSE	-0.196402	4.32756	0.678546	1	FALSE	0.0872046	4.32756	0.884183	1	FALSE	-0.327876	4.32752	0.44153	1	FALSE
1	192920348	192922348	LINC01032	ENSG00000234871	-2960	192906430	192917387	-	768	69	TRUE	-0.279391	6.23425	0.0310032	1	FALSE	-0.270408	6.23426	0.00534609	1	FALSE	0.455017	6.23425	1.82244e-07	0.00224397	FALSE	-0.0792334	6.23426	0.512894	1	FALSE	-0.177278	6.23426	0.377228	1	FALSE	-0.00991156	6.23427	0.914216	1	FALSE	0.00417523	6.2342	0.9585	1	FALSE
1	193079545	193082030	GLRX2	ENSG00000023572	-4300	193065598	193075244	-	768	4	FALSE	0.456166	5.08671	0.00388459	1	FALSE	-0.917228	5.08679	1.3573e-09	1.68169e-05	FALSE	0.307026	5.08674	0.0155562	1	FALSE	-0.0709413	5.08676	0.601856	1	FALSE	0.235806	5.08675	0.33673	1	FALSE	0.1328	5.0868	0.360786	1	FALSE	-0.109081	5.08652	0.541525	1	FALSE
1	193090328	193090646	CDC73	ENSG00000134371	-500	193091147	193223031	+	768	102	TRUE	0.431133	4.99912	0.0021559	1	FALSE	-0.406252	4.99919	0.00185839	1	FALSE	0.414711	4.99914	6.31446e-05	0.710692	FALSE	-0.196219	4.99917	0.174529	1	FALSE	0.290093	4.99916	0.159438	1	FALSE	-0.675361	4.9992	2.159e-06	0.0242693	FALSE	0.160278	4.99893	0.431962	1	FALSE
1	193267906	193269470	LINC01031	ENSG00000232077	-4404	193273875	193335083	+	768	48	TRUE	-0.123045	5.62407	0.454565	1	FALSE	-0.209434	5.62412	0.0764938	1	FALSE	-0.399809	5.62409	0.00185051	1	FALSE	-1.12465	5.6241	4.64078e-13	6.02791e-09	TRUE	0.757797	5.6241	0.0002397	1	FALSE	1.2397	5.62413	1.45398e-25	1.91126e-21	TRUE	-0.436216	5.62395	0.0247607	1	FALSE
1	193417841	193418590	LINC01031	ENSG00000232077	82757	193273875	193335083	+	768	7	FALSE	-0.0505441	4.31984	1	1	FALSE	-0.177892	4.31986	0.297871	1	FALSE	0.0678611	4.31985	0.603783	1	FALSE	-0.839003	4.31985	0.00013419	1	FALSE	1.27594	4.31985	2.86309e-06	0.0351073	FALSE	0.228626	4.31986	0.262347	1	FALSE	-0.157319	4.31979	0.510512	1	FALSE
1	193448077	193449192	LINC01031	ENSG00000232077	112993	193273875	193335083	+	768	23	FALSE	-0.620426	4.68896	0.0148257	1	FALSE	-0.852291	4.68899	2.69885e-05	0.292501	FALSE	-0.211084	4.68898	0.343342	1	FALSE	-0.728169	4.68898	0.00113336	1	FALSE	0.988088	4.68898	0.00138457	1	FALSE	1.51453	4.689	3.40652e-17	4.37124e-13	FALSE	-0.695739	4.68889	0.0325968	1	FALSE
1	193494659	193495708	RP11-21J7.1	ENSG00000226640	-152315	193648024	193696165	+	768	0	FALSE	0.211401	4.23695	0.401644	1	FALSE	-0.310364	4.23694	0.115583	1	FALSE	0.0684987	4.23695	0.63016	1	FALSE	-0.276813	4.23694	0.299675	1	FALSE	0.613134	4.23694	0.0595979	1	FALSE	0.293803	4.23694	0.197021	1	FALSE	-0.442646	4.23696	0.261446	1	FALSE
1	193506037	193508399	RP11-21J7.1	ENSG00000226640	-139624	193648024	193696165	+	768	3	FALSE	0.0127317	4.63433	1	1	FALSE	-0.253378	4.63437	0.105877	1	FALSE	-0.0043135	4.63434	0.924647	1	FALSE	-0.928881	4.63435	3.74667e-06	0.0437049	FALSE	0.655141	4.63435	0.0137176	1	FALSE	0.860192	4.63437	6.36393e-07	0.0072727	FALSE	-0.483665	4.63423	0.0834554	1	FALSE
1	193508460	193512349	RP11-21J7.1	ENSG00000226640	-135674	193648024	193696165	+	768	134	TRUE	0.374957	7.06739	0.0117359	1	FALSE	-0.457165	7.06741	0.000210557	1	FALSE	0.348117	7.06739	0.00184624	1	FALSE	0.206307	7.0674	0.112078	1	FALSE	-0.204673	7.0674	0.38339	1	FALSE	-0.359538	7.06741	0.0107657	1	FALSE	-0.202288	7.06733	0.275301	1	FALSE
1	193538848	193539386	RP11-21J7.1	ENSG00000226640	-108637	193648024	193696165	+	768	0	FALSE	0.178465	4.12738	0.271909	1	FALSE	0.196918	4.12738	0.378552	1	FALSE	-0.0754245	4.12738	0.91549	1	FALSE	-0.0225687	4.12738	1	1	FALSE	0.0534333	4.12738	0.929797	1	FALSE	-0.212051	4.12738	0.270267	1	FALSE	-0.197843	4.12738	0.7162	1	FALSE
1	193561503	193562536	RP11-21J7.1	ENSG00000226640	-85487	193648024	193696165	+	768	0	FALSE	-0.529751	4.16783	0.129763	1	FALSE	0.0264768	4.16785	1	1	FALSE	-0.181985	4.16784	0.402779	1	FALSE	0.384419	4.16784	0.0431395	1	FALSE	0.432134	4.16784	0.270502	1	FALSE	-0.150696	4.16785	0.561402	1	FALSE	0.0692392	4.1678	1	1	FALSE
1	193895911	193896364	RPL23AP22	ENSG00000237213	-169513	193725945	193726397	-	768	0	FALSE	0.208347	4.12408	0.515477	1	FALSE	-0.0135921	4.12408	1	1	FALSE	0.109355	4.12408	0.258111	1	FALSE	-0.186859	4.12408	0.40435	1	FALSE	0.0805244	4.12408	1	1	FALSE	-0.0652538	4.12408	1	1	FALSE	-0.168909	4.12407	0.925804	1	FALSE
1	194013370	194014241	RP11-563D10.1	ENSG00000227240	-104361	194118603	194167824	+	768	2	FALSE	-0.613658	4.20781	0.109502	1	FALSE	-0.895373	4.20784	0.000260713	1	FALSE	0.517778	4.20782	0.0182749	1	FALSE	0.542787	4.20783	0.0373811	1	FALSE	-0.00352008	4.20782	0.959501	1	FALSE	-0.102738	4.20784	0.731378	1	FALSE	-0.0456393	4.20774	1	1	FALSE
1	194016246	194016730	RP11-563D10.1	ENSG00000227240	-101872	194118603	194167824	+	768	0	FALSE	-0.279704	4.15389	0.440108	1	FALSE	-0.481283	4.1539	0.0231455	1	FALSE	0.233642	4.1539	0.202409	1	FALSE	0.485838	4.1539	0.0248677	1	FALSE	-0.0448602	4.1539	1	1	FALSE	0.012944	4.1539	1	1	FALSE	-0.3292	4.15388	0.411163	1	FALSE
1	194021688	194022333	RP11-563D10.1	ENSG00000227240	-96269	194118603	194167824	+	768	1	FALSE	-0.101758	4.14848	0.984067	1	FALSE	-0.44205	4.14849	0.011831	1	FALSE	0.0891296	4.14848	0.689758	1	FALSE	0.627382	4.14849	0.00177062	1	FALSE	0.176964	4.14848	0.978656	1	FALSE	-0.155478	4.14849	0.505511	1	FALSE	-0.511819	4.14845	0.14606	1	FALSE
1	194053124	194055180	RP11-563D10.1	ENSG00000227240	-63422	194118603	194167824	+	768	0	FALSE	0.028397	4.18572	1	1	FALSE	-0.449909	4.18574	0.0659146	1	FALSE	-0.135806	4.18572	0.668	1	FALSE	0.467571	4.18573	0.0290466	1	FALSE	0.343381	4.18573	0.599502	1	FALSE	-0.193271	4.18574	0.670559	1	FALSE	0.200197	4.18567	0.735117	1	FALSE
1	194194957	194195548	RP11-563D10.1	ENSG00000227240	27132	194118603	194167824	+	768	4	FALSE	0.45434	4.29385	0.139086	1	FALSE	-0.681574	4.29387	0.011588	1	FALSE	0.605305	4.29385	0.0100663	1	FALSE	0.340118	4.29386	0.190451	1	FALSE	0.419519	4.29386	0.320149	1	FALSE	-1.39191	4.29388	8.70234e-06	0.0958824	FALSE	-0.307784	4.29378	0.546101	1	FALSE
1	194331062	194331851	RP11-476H20.1	ENSG00000231714	9505	194320073	194321556	+	768	1	FALSE	0.0120637	4.131	1	1	FALSE	-0.272077	4.13099	0.0560849	1	FALSE	0.296475	4.131	0.0738017	1	FALSE	-0.0693873	4.131	1	1	FALSE	-0.235283	4.131	0.916054	1	FALSE	0.0704591	4.13099	0.823234	1	FALSE	-0.0447487	4.13101	1	1	FALSE
1	194363184	194365454	RP11-476H20.1	ENSG00000231714	41627	194320073	194321556	+	768	0	FALSE	-0.154692	4.25431	0.697342	1	FALSE	0.483615	4.25433	0.0385742	1	FALSE	0.334919	4.25431	0.08826	1	FALSE	-1.1656	4.25432	3.39755e-06	0.0396902	FALSE	-0.507114	4.25432	0.410642	1	FALSE	-0.687571	4.25433	0.00946276	1	FALSE	0.849498	4.25424	0.00641545	1	FALSE
1	194436900	194437629	RNU6-983P	ENSG00000251813	19603	194457233	194457335	-	768	3	FALSE	0.120011	4.17631	0.463509	1	FALSE	-0.481535	4.17633	0.0173672	1	FALSE	0.0188794	4.17632	0.856802	1	FALSE	0.0197169	4.17632	1	1	FALSE	-0.245934	4.17632	0.823358	1	FALSE	-0.316579	4.17633	0.199852	1	FALSE	1.0097	4.17629	0.000533075	1	FALSE
1	194472117	194473077	RNU6-983P	ENSG00000251813	-14781	194457233	194457335	-	768	1	FALSE	-0.0332037	4.14755	0.936653	1	FALSE	0.114576	4.14756	0.73317	1	FALSE	-0.29454	4.14755	0.199604	1	FALSE	0.264123	4.14756	0.518503	1	FALSE	-0.262609	4.14755	0.385813	1	FALSE	-0.11344	4.14756	0.887076	1	FALSE	0.262847	4.14754	0.534167	1	FALSE
1	194553219	194553662	RNU6-983P	ENSG00000251813	-95883	194457233	194457335	-	768	60	TRUE	0.0933473	4.81239	0.779347	1	FALSE	-2.74755	4.81243	2.61673e-14	3.39914e-10	TRUE	1.62482	4.8124	5.34926e-09	6.76485e-05	TRUE	-2.35879	4.81242	6.88081e-09	8.56868e-05	TRUE	-1.75692	4.81241	0.022497	1	FALSE	0.0322327	4.81243	0.919189	1	FALSE	1.06972	4.81229	0.0104164	1	FALSE
1	194569345	194570549	RNU6-983P	ENSG00000251813	-112009	194457233	194457335	-	768	60	TRUE	0.226319	5.01312	0.528573	1	FALSE	-2.76531	5.01324	5.69266e-15	7.41867e-11	TRUE	2.22568	5.01316	5.91584e-19	7.89172e-15	TRUE	-1.12581	5.0132	0.00257338	1	FALSE	-1.53706	5.01319	0.0250804	1	FALSE	-1.67051	5.01326	1.83131e-05	0.199265	FALSE	0.254932	5.01281	0.538777	1	FALSE
1	194668174	194668645	RP11-489C13.1	ENSG00000228167	-19279	194687925	194688366	+	768	1	FALSE	0.236308	4.1326	0.232363	1	FALSE	-0.123458	4.1326	0.560368	1	FALSE	0.337276	4.1326	0.0606714	1	FALSE	-0.220651	4.1326	0.394568	1	FALSE	-0.269882	4.1326	0.856657	1	FALSE	-0.156825	4.1326	0.506975	1	FALSE	-0.125642	4.13259	1	1	FALSE
1	194674272	194675170	RP11-489C13.1	ENSG00000228167	-12754	194687925	194688366	+	768	1	FALSE	0.0012087	4.27829	0.949012	1	FALSE	-0.282862	4.27832	0.237269	1	FALSE	0.821952	4.2783	0.00010448	1	FALSE	-0.885346	4.27831	0.00186127	1	FALSE	-0.736484	4.27831	0.138494	1	FALSE	-0.077218	4.27833	0.977313	1	FALSE	0.155719	4.27821	0.68076	1	FALSE
1	194798760	194800931	RP11-489C13.1	ENSG00000228167	110393	194687925	194688366	+	768	38	FALSE	2.23931	5.1354	3.37104e-23	4.50775e-19	FALSE	-2.29921	5.13561	3.6489e-18	4.82275e-14	FALSE	-0.359259	5.13548	0.144917	1	FALSE	-0.785685	5.13554	0.00379903	1	FALSE	-1.80898	5.13552	0.000217044	1	FALSE	0.547119	5.13564	0.0244975	1	FALSE	-0.455451	5.13488	0.229162	1	FALSE
1	194908827	194909671	AL357932.1	ENSG00000265108	-186139	195095811	195095906	+	768	13	FALSE	-0.548112	4.41846	0.138001	1	FALSE	-0.866483	4.41847	0.00194183	1	FALSE	0.89602	4.41846	4.82115e-05	0.545465	FALSE	-0.267955	4.41847	0.343879	1	FALSE	-0.431768	4.41847	0.422006	1	FALSE	0.086533	4.41847	0.686303	1	FALSE	0.259682	4.41845	0.542231	1	FALSE
1	194937499	194938769	AL357932.1	ENSG00000265108	-157041	195095811	195095906	+	768	2	FALSE	-0.470557	4.24878	0.244156	1	FALSE	-0.740729	4.2488	0.0059827	1	FALSE	1.3275	4.24879	1.40099e-10	1.8049e-06	FALSE	-0.808665	4.2488	0.00225056	1	FALSE	-0.453868	4.2488	0.503099	1	FALSE	-0.43039	4.24881	0.167148	1	FALSE	0.200682	4.24874	0.710894	1	FALSE
1	195040198	195041753	AL357932.1	ENSG00000265108	-54057	195095811	195095906	+	768	3	FALSE	0.366226	4.36483	0.254709	1	FALSE	-0.232154	4.3649	0.397417	1	FALSE	-0.110389	4.36486	0.808963	1	FALSE	-0.233441	4.36488	0.357864	1	FALSE	-1.47608	4.36487	0.00765644	1	FALSE	0.693995	4.36491	0.0068918	1	FALSE	-0.174256	4.36468	0.688247	1	FALSE
1	195164258	195166128	AL357932.1	ENSG00000265108	68351	195095811	195095906	+	768	10	FALSE	-0.474049	4.47091	0.210513	1	FALSE	-0.962788	4.471	0.000764234	1	FALSE	1.11539	4.47094	2.15284e-06	0.0257221	FALSE	-0.452603	4.47097	0.156107	1	FALSE	-1.00262	4.47096	0.114867	1	FALSE	-0.88709	4.47101	0.00948837	1	FALSE	1.10681	4.47071	0.00168699	1	FALSE
1	195246943	195249023	AL357932.1	ENSG00000265108	151036	195095811	195095906	+	768	0	FALSE	-0.0642299	4.19101	0.840631	1	FALSE	0.245945	4.19101	0.214393	1	FALSE	0.138928	4.19101	0.527154	1	FALSE	-0.127655	4.19101	0.85973	1	FALSE	-0.459841	4.19101	0.537617	1	FALSE	-0.000683171	4.19101	1	1	FALSE	-0.318671	4.191	0.27013	1	FALSE
1	195464909	195465909	AL357932.1	ENSG00000265108	369002	195095811	195095906	+	768	2	FALSE	-0.70574	4.21657	0.0732791	1	FALSE	0.0860383	4.21661	0.843859	1	FALSE	-0.267106	4.21659	0.378502	1	FALSE	-0.739077	4.2166	0.0089806	1	FALSE	0.575751	4.21659	0.17048	1	FALSE	0.113733	4.21661	0.819194	1	FALSE	1.12504	4.21649	0.00103532	1	FALSE
1	195562930	195563813	RP11-476B1.1	ENSG00000227421	450312	196014126	196030203	-	768	1	FALSE	-0.274077	4.15759	0.398503	1	FALSE	0.646967	4.1576	0.00246342	1	FALSE	-0.22439	4.1576	0.338661	1	FALSE	-0.65927	4.1576	0.00404951	1	FALSE	-0.139207	4.1576	0.85289	1	FALSE	-0.398155	4.15761	0.123852	1	FALSE	0.775633	4.15756	0.0168999	1	FALSE
1	195606433	195607266	RP11-476B1.1	ENSG00000227421	406859	196014126	196030203	-	768	1	FALSE	-0.120991	4.14577	0.716998	1	FALSE	-0.0521996	4.14577	1	1	FALSE	-0.122636	4.14577	0.588417	1	FALSE	0.109608	4.14577	0.726469	1	FALSE	-0.465403	4.14577	0.445495	1	FALSE	0.330232	4.14577	0.172691	1	FALSE	0.0123069	4.14575	1	1	FALSE
1	195867449	195868003	RP11-476B1.1	ENSG00000227421	146122	196014126	196030203	-	768	0	FALSE	-0.0169313	4.11635	1	1	FALSE	0.0745456	4.11635	0.424479	1	FALSE	-0.0193929	4.11635	1	1	FALSE	-0.0180404	4.11635	1	1	FALSE	-0.0158806	4.11635	1	1	FALSE	-0.0174594	4.11635	1	1	FALSE	-0.0162147	4.11634	1	1	FALSE
1	196115368	196116331	KCNT2	ENSG00000162687	78577	196194909	196577541	-	768	0	FALSE	0.564904	4.18477	0.0299047	1	FALSE	-0.345152	4.1848	0.159317	1	FALSE	-0.298394	4.18478	0.278158	1	FALSE	0.271313	4.18479	0.250283	1	FALSE	-0.496856	4.18479	0.576934	1	FALSE	0.120793	4.1848	0.857993	1	FALSE	-0.0375039	4.1847	0.894161	1	FALSE
1	196185440	196187254	KCNT2	ENSG00000162687	7654	196194909	196577541	-	768	17	FALSE	1.54189	4.90329	1.56645e-05	0.182115	FALSE	-1.17096	4.90355	0.000827768	1	FALSE	0.326817	4.90338	0.264041	1	FALSE	-0.931383	4.90346	0.0165572	1	FALSE	0.839427	4.90344	0.0995116	1	FALSE	-1.12823	4.90358	0.00664632	1	FALSE	0.25632	4.90265	0.534173	1	FALSE
1	196741992	196743424	CFHR3	ENSG00000116785	-500	196743925	196763203	+	768	1	FALSE	0.970248	4.19716	0.000377338	1	FALSE	-0.828368	4.19718	0.000594105	1	FALSE	-0.789151	4.19717	0.000674541	1	FALSE	0.450058	4.19717	0.0576853	1	FALSE	1.15611	4.19717	0.00228535	1	FALSE	-0.314176	4.19718	0.294263	1	FALSE	-0.17061	4.1971	0.741185	1	FALSE
1	197116325	197116329	ASPM	ENSG00000066279	-500	197053258	197115824	-	768	79	TRUE	0.145308	4.16073	0.467674	1	FALSE	-0.298762	4.16074	0.10963	1	FALSE	0.135392	4.16074	0.299925	1	FALSE	-0.31165	4.16074	0.222736	1	FALSE	0.419603	4.16074	0.408862	1	FALSE	0.163369	4.16074	0.537777	1	FALSE	-0.0340403	4.16072	0.944406	1	FALSE
1	197745327	197748782	DENND1B	ENSG00000213047	-500	197704788	197744826	-	768	22	FALSE	-0.265265	5.53824	0.166297	1	FALSE	-0.75396	5.53831	5.1887e-07	0.00604846	FALSE	0.0243276	5.53826	0.754157	1	FALSE	-0.830046	5.53829	2.4077e-07	0.00290538	FALSE	0.779415	5.53828	0.000958996	1	FALSE	1.14926	5.53832	1.47168e-16	1.88272e-12	FALSE	-0.279418	5.53807	0.226777	1	FALSE
1	197775465	197778857	DENND1B	ENSG00000213047	-30638	197704788	197744826	-	768	15	FALSE	0.27664	5.06932	0.205466	1	FALSE	-0.836053	5.06951	1.66625e-05	0.182771	FALSE	-0.167028	5.06939	0.431827	1	FALSE	-0.637664	5.06945	0.00171601	1	FALSE	1.77197	5.06943	5.39979e-13	7.06292e-09	FALSE	0.44125	5.06953	0.0241858	1	FALSE	-0.512713	5.06887	0.0648303	1	FALSE
1	197870697	197871276	C1orf53	ENSG00000203724	-500	197871777	197876497	+	768	176	TRUE	1.17063	5.38082	6.07991e-13	7.95374e-09	TRUE	-0.945366	5.38105	8.60404e-09	0.000104892	TRUE	0.170833	5.3809	0.167637	1	FALSE	-0.407886	5.38098	0.0153286	1	FALSE	0.715112	5.38095	0.00345632	1	FALSE	-0.413677	5.38108	0.0153837	1	FALSE	-0.171215	5.38024	0.49554	1	FALSE
1	198125189	198125592	NEK7	ENSG00000151414	-500	198126093	198291550	+	768	83	TRUE	0.679057	4.69998	0.000161149	1	FALSE	-1.33885	4.70013	2.60779e-13	3.36614e-09	TRUE	-0.400781	4.70003	0.0161065	1	FALSE	-0.0415424	4.70008	0.759622	1	FALSE	0.926432	4.70006	0.000140081	1	FALSE	0.709941	4.70015	7.38159e-06	0.0815518	FALSE	-0.374515	4.69962	0.133954	1	FALSE
1	198512627	198513173	ATP6V1G3	ENSG00000151418	-2551	198492356	198510075	-	768	0	FALSE	0.332701	4.1435	0.187833	1	FALSE	-0.358815	4.1435	0.0806819	1	FALSE	-0.19715	4.1435	0.354323	1	FALSE	0.43798	4.1435	0.0289791	1	FALSE	-0.0242449	4.1435	1	1	FALSE	-0.19296	4.14351	0.321478	1	FALSE	0.0628134	4.14348	0.854809	1	FALSE
1	198518738	198519418	ATP6V1G3	ENSG00000151418	-8662	198492356	198510075	-	768	0	FALSE	0.0352701	4.12797	0.840752	1	FALSE	-0.180632	4.12798	0.422842	1	FALSE	0.016523	4.12797	1	1	FALSE	0.148587	4.12798	0.308831	1	FALSE	-0.016366	4.12797	0.963855	1	FALSE	-0.116488	4.12798	0.783868	1	FALSE	0.195463	4.12796	0.579192	1	FALSE
1	198568499	198568521	RP11-553K8.2	ENSG00000223881	-500	198566854	198567998	-	768	9	FALSE	0.0409334	4.1206	0.868521	1	FALSE	-0.019191	4.12061	1	1	FALSE	-0.105973	4.12061	0.555878	1	FALSE	0.268411	4.12061	0.0724596	1	FALSE	-0.0863515	4.12061	1	1	FALSE	-0.0955593	4.12061	0.880851	1	FALSE	-0.0885848	4.1206	1	1	FALSE
1	198581897	198582366	RP11-553K8.2	ENSG00000223881	-13898	198566854	198567998	-	768	1	FALSE	0.149957	4.19776	0.591054	1	FALSE	-0.231056	4.19775	0.486267	1	FALSE	0.170242	4.19776	0.341556	1	FALSE	-0.136857	4.19775	0.639308	1	FALSE	-0.322358	4.19775	0.470668	1	FALSE	0.107741	4.19775	0.735942	1	FALSE	0.122703	4.19778	0.726703	1	FALSE
1	198588491	198593092	PTPRC	ENSG00000081237	-14708	198607801	198677286	+	768	6	FALSE	-1.21639	4.52488	0.00256645	1	FALSE	-1.5484	4.52512	4.27835e-07	0.00499883	FALSE	-1.20874	4.52497	1.42133e-05	0.164831	FALSE	1.82358	4.52504	8.65233e-15	1.13346e-10	FALSE	-0.157037	4.52502	0.810111	1	FALSE	-0.627147	4.52515	0.0577327	1	FALSE	1.22982	4.52431	0.000260144	1	FALSE
1	198907059	198907467	MIR181A1HG	ENSG00000229989	-500	198867595	198906558	-	768	0	FALSE	0.157475	4.20493	0.395598	1	FALSE	-0.494942	4.20493	0.0131234	1	FALSE	0.622524	4.20493	0.000685292	1	FALSE	-0.41334	4.20493	0.0792148	1	FALSE	-0.340152	4.20493	0.360554	1	FALSE	0.108445	4.20493	0.824296	1	FALSE	-0.180441	4.20492	0.800999	1	FALSE
1	199050865	199052471	RP11-16L9.4	ENSG00000235492	5000	198985262	199045864	+	768	1	FALSE	0.798036	4.2576	0.00230859	1	FALSE	-0.770324	4.25763	0.0059435	1	FALSE	-0.250853	4.25761	0.261315	1	FALSE	0.188884	4.25762	0.458023	1	FALSE	-0.714397	4.25762	0.216485	1	FALSE	0.0454197	4.25764	0.878126	1	FALSE	0.438719	4.25751	0.168137	1	FALSE
1	199058439	199059236	RP11-16L9.4	ENSG00000235492	12574	198985262	199045864	+	768	13	FALSE	-0.335013	4.41747	0.25485	1	FALSE	-0.462458	4.41754	0.0305679	1	FALSE	-0.0558316	4.4175	0.903498	1	FALSE	0.262714	4.41752	0.145902	1	FALSE	0.910925	4.41751	0.00535779	1	FALSE	-0.0802154	4.41755	0.759757	1	FALSE	0.205139	4.4173	0.549899	1	FALSE
1	199082013	199082826	RP11-382E9.1	ENSG00000231718	-34899	199117726	199362435	+	768	0	FALSE	0.0552107	4.11937	0.741602	1	FALSE	0.00184812	4.11937	1	1	FALSE	-0.0121864	4.11937	1	1	FALSE	-0.087968	4.11937	0.982748	1	FALSE	-0.0776584	4.11937	1	1	FALSE	-0.085201	4.11937	1	1	FALSE	0.289897	4.11937	0.579805	1	FALSE
1	199369327	199369811	RP11-382E9.1	ENSG00000231718	6891	199117726	199362435	+	768	0	FALSE	-0.0335835	4.11658	1	1	FALSE	-0.0368204	4.11658	1	1	FALSE	-0.0384342	4.11658	1	1	FALSE	-0.0357705	4.11658	1	1	FALSE	0.217096	4.11658	0.197965	1	FALSE	0.0826146	4.11658	0.567362	1	FALSE	-0.0321682	4.11657	1	1	FALSE
1	199430160	199430618	RP11-382E9.1	ENSG00000231718	67724	199117726	199362435	+	768	2	FALSE	0.260821	4.13343	0.25868	1	FALSE	-0.0812823	4.13343	0.903079	1	FALSE	-0.0373248	4.13343	1	1	FALSE	-0.114479	4.13343	0.846372	1	FALSE	-0.0618383	4.13343	1	1	FALSE	0.132971	4.13343	0.521166	1	FALSE	-0.105809	4.13343	1	1	FALSE
1	199458202	199459724	RP11-382E9.1	ENSG00000231718	95766	199117726	199362435	+	768	1	FALSE	-0.370835	4.23163	0.427035	1	FALSE	0.410124	4.23165	0.0736047	1	FALSE	0.449859	4.23164	0.0347211	1	FALSE	-0.422689	4.23165	0.0996051	1	FALSE	-0.343558	4.23164	0.410226	1	FALSE	-0.429528	4.23166	0.0936999	1	FALSE	-0.103597	4.23157	1	1	FALSE
1	199514988	199515892	AL450244.1	ENSG00000263805	68423	199584316	199584408	-	768	0	FALSE	-0.083306	4.12073	1	1	FALSE	0.00219646	4.12073	1	1	FALSE	0.143274	4.12073	0.166027	1	FALSE	-0.0886156	4.12073	0.82339	1	FALSE	-0.0782463	4.12073	1	1	FALSE	0.033416	4.12073	1	1	FALSE	-0.0799843	4.12074	1	1	FALSE
1	199901027	199901907	RP11-567B20.2	ENSG00000229747	22250	199878049	199878776	+	768	162	TRUE	-0.0865625	5.65001	0.8031	1	FALSE	-0.578807	5.65001	0.00520897	1	FALSE	0.0347231	5.65001	0.814811	1	FALSE	0.48451	5.65001	0.0199003	1	FALSE	-2.3592	5.65001	5.35513e-07	0.00666071	TRUE	0.210834	5.65001	0.346653	1	FALSE	0.506564	5.65003	0.0644915	1	FALSE
1	199910478	199911506	RP11-567B20.2	ENSG00000229747	31701	199878049	199878776	+	768	254	TRUE	0.0395104	6.38915	0.830955	1	FALSE	-0.497576	6.38918	0.0123941	1	FALSE	0.121142	6.38916	0.48223	1	FALSE	0.73174	6.38917	0.000193798	1	FALSE	-1.87925	6.38917	2.24862e-05	0.269003	FALSE	-0.145894	6.38919	0.503258	1	FALSE	0.0249438	6.38907	0.894258	1	FALSE
1	199945679	199949183	RNU6-716P	ENSG00000202491	28449	199977633	199977735	-	768	0	FALSE	0.581636	4.55227	0.00537897	1	FALSE	-0.679268	4.55229	0.000308325	1	FALSE	-0.15213	4.55227	0.580378	1	FALSE	0.507864	4.55228	0.00664394	1	FALSE	-1.6657	4.55228	0.000116267	1	FALSE	0.0987421	4.55229	0.742676	1	FALSE	0.190176	4.55221	0.619732	1	FALSE
1	200231643	200232047	FAM58BP	ENSG00000233827	47999	200182656	200183643	+	768	5	FALSE	0.674903	4.16374	0.030445	1	FALSE	-0.0948967	4.16376	0.777496	1	FALSE	0.173719	4.16375	0.180636	1	FALSE	-0.146346	4.16375	0.839838	1	FALSE	-0.0845319	4.16375	1	1	FALSE	-0.5663	4.16376	0.0241498	1	FALSE	-0.224644	4.16371	0.810033	1	FALSE
1	200254981	200255639	RP11-532L16.3	ENSG00000273093	28923	200284563	200285095	-	768	73	TRUE	-0.758973	5.24672	0.00180235	1	FALSE	-0.779101	5.24674	4.27867e-05	0.458631	FALSE	-0.968437	5.24673	1.59179e-07	0.00196332	TRUE	-0.0620086	5.24673	0.725375	1	FALSE	-1.90478	5.24673	8.13144e-06	0.0985855	FALSE	2.12277	5.24674	3.83408e-45	5.12616e-41	TRUE	-0.651797	5.24667	0.0282299	1	FALSE
1	200270415	200272521	RP11-532L16.3	ENSG00000273093	12041	200284563	200285095	-	768	30	FALSE	0.771066	5.50466	4.12546e-05	0.470426	FALSE	-0.128136	5.50477	0.511351	1	FALSE	-0.251161	5.5047	0.137993	1	FALSE	0.496656	5.50473	0.0028502	1	FALSE	-2.22293	5.50472	1.90793e-09	2.44654e-05	FALSE	-0.290443	5.50478	0.0975678	1	FALSE	-0.217872	5.50438	0.400322	1	FALSE
1	200273664	200277085	RP11-532L16.3	ENSG00000273093	7477	200284563	200285095	-	768	0	FALSE	0.733589	4.38275	0.00106936	1	FALSE	-0.416981	4.38281	0.0948589	1	FALSE	-0.311277	4.38277	0.218585	1	FALSE	0.469933	4.38279	0.0270534	1	FALSE	-1.00194	4.38278	0.0194557	1	FALSE	-0.0624123	4.38281	0.715072	1	FALSE	-0.150802	4.38263	0.602373	1	FALSE
1	200348095	200348798	LINC00862	ENSG00000203721	-4612	200311672	200343482	-	768	154	TRUE	-0.0809853	5.30367	0.699227	1	FALSE	-0.716531	5.3037	2.38769e-06	0.0271314	FALSE	0.514565	5.30368	0.000119978	1	FALSE	-0.798556	5.30369	2.38965e-06	0.028088	FALSE	0.253253	5.30369	0.283894	1	FALSE	0.805296	5.3037	6.99338e-08	0.000819485	TRUE	-0.585752	5.30362	0.0141136	1	FALSE
1	200379685	200382245	ZNF281	ENSG00000162702	-500	200374068	200379184	-	768	109	TRUE	-0.627024	6.56815	0.0505514	1	FALSE	-0.121266	6.56815	0.628752	1	FALSE	1.23152	6.56815	8.7948e-10	1.12442e-05	TRUE	-1.03662	6.56815	0.000142368	1	FALSE	-1.06343	6.56815	0.0292462	1	FALSE	-0.16776	6.56815	0.553781	1	FALSE	-0.329232	6.56817	0.375143	1	FALSE
1	200384457	200386157	ZNF281	ENSG00000162702	-5272	200374068	200379184	-	768	57	TRUE	-0.259757	5.65066	0.382667	1	FALSE	-0.143478	5.65068	0.528092	1	FALSE	0.946216	5.65067	6.32603e-07	0.00768232	TRUE	-0.621928	5.65067	0.0123711	1	FALSE	-0.946668	5.65067	0.035473	1	FALSE	0.0361611	5.65068	0.833177	1	FALSE	-0.743407	5.65062	0.0282854	1	FALSE
1	200406630	200407417	ZNF281	ENSG00000162702	-27445	200374068	200379184	-	768	9	FALSE	-0.71295	4.3159	0.0365628	1	FALSE	-0.0245107	4.3159	0.951256	1	FALSE	0.797322	4.3159	0.00052804	1	FALSE	0.339255	4.3159	0.226009	1	FALSE	-0.890259	4.3159	0.147523	1	FALSE	-0.892895	4.3159	0.00501204	1	FALSE	-0.340393	4.3159	0.444053	1	FALSE
1	200417055	200418185	RP11-469A15.2	ENSG00000230623	-24862	200443048	200447421	+	768	1	FALSE	-0.303059	4.29402	0.25836	1	FALSE	0.285703	4.29404	0.137698	1	FALSE	0.205031	4.29403	0.246519	1	FALSE	0.0741506	4.29403	0.793763	1	FALSE	0.311907	4.29403	0.525862	1	FALSE	-0.557652	4.29404	0.0311265	1	FALSE	-0.404696	4.29398	0.42884	1	FALSE
1	200441810	200442547	RP11-469A15.2	ENSG00000230623	-500	200443048	200447421	+	768	0	FALSE	-0.109612	4.22155	0.781099	1	FALSE	0.11486	4.22155	0.688924	1	FALSE	0.324575	4.22155	0.148017	1	FALSE	-0.202929	4.22155	0.682135	1	FALSE	-0.136913	4.22155	1	1	FALSE	0.0949139	4.22155	0.771263	1	FALSE	-0.85816	4.22155	0.022764	1	FALSE
1	200707419	200708185	CAMSAP2	ENSG00000118200	-500	200708686	200829832	+	768	613	TRUE	0.109903	7.23047	0.325822	1	FALSE	-0.120366	7.23048	0.222307	1	FALSE	0.547998	7.23048	7.36095e-11	9.50888e-07	FALSE	-0.439368	7.23048	2.05227e-05	0.232419	FALSE	0.889576	7.23048	4.11274e-09	5.25567e-05	TRUE	-0.569628	7.23048	1.08391e-07	0.00126427	FALSE	-0.583809	7.23045	5.99541e-05	0.790375	FALSE
1	200851241	200851801	GPR25	ENSG00000170128	7934	200842083	200843306	+	768	12	FALSE	0.156603	4.39634	0.5402	1	FALSE	-0.632988	4.3964	0.00853234	1	FALSE	0.148955	4.39636	0.475687	1	FALSE	0.330453	4.39638	0.154303	1	FALSE	0.852422	4.39637	0.0221005	1	FALSE	-0.390367	4.3964	0.16951	1	FALSE	-0.256031	4.3962	0.5548	1	FALSE
1	200857143	200858327	C1orf106	ENSG00000163362	-1848	200860176	200868666	+	768	16	FALSE	-0.168653	4.69169	0.687319	1	FALSE	-1.29928	4.69184	7.76497e-06	0.086463	FALSE	0.225477	4.69174	0.341949	1	FALSE	0.662711	4.69179	0.0143658	1	FALSE	1.70584	4.69178	1.24822e-05	0.150573	FALSE	-0.794741	4.69186	0.0179156	1	FALSE	-0.510979	4.69131	0.279039	1	FALSE
1	200859598	200859675	C1orf106	ENSG00000163362	-500	200860176	200868666	+	768	17	FALSE	0.537836	4.19524	0.0545331	1	FALSE	-0.649455	4.19528	0.00735041	1	FALSE	-0.113975	4.19525	0.607866	1	FALSE	-0.33427	4.19526	0.18155	1	FALSE	1.45489	4.19526	2.34051e-06	0.0287602	FALSE	0.067719	4.19528	0.771429	1	FALSE	-0.729532	4.19515	0.0884676	1	FALSE
1	201141203	201141621	TMEM9	ENSG00000116857	-500	201103900	201140702	-	768	21	FALSE	0.487848	4.31076	0.0703472	1	FALSE	-1.39748	4.31079	6.47626e-09	7.92047e-05	FALSE	0.409817	4.31077	0.045361	1	FALSE	-0.492103	4.31078	0.0883125	1	FALSE	-1.17798	4.31078	0.0139781	1	FALSE	0.810239	4.3108	0.00026972	1	FALSE	0.0863772	4.31068	0.964173	1	FALSE
1	201923666	201924118	TIMM17A	ENSG00000134375	-500	201924619	201939789	+	768	161	TRUE	0.818374	5.57058	6.53912e-10	8.35242e-06	TRUE	-1.03707	5.57073	3.18465e-16	4.17826e-12	TRUE	-0.232265	5.57063	0.0612819	1	FALSE	0.4636	5.57068	0.000107373	1	FALSE	0.732826	5.57066	0.000156026	1	FALSE	-0.371906	5.57075	0.010886	1	FALSE	-0.0319078	5.57021	0.769742	1	FALSE
1	202003633	202004949	RP11-510N19.3	ENSG00000235811	-4029	202008979	202009062	+	768	3	FALSE	0.774441	4.25982	0.00792679	1	FALSE	-0.584132	4.25982	0.0225976	1	FALSE	0.387833	4.25982	0.12992	1	FALSE	-0.933713	4.25982	0.00209926	1	FALSE	-1.26192	4.25982	0.00656159	1	FALSE	0.688994	4.25982	0.00580805	1	FALSE	-0.684895	4.25983	0.172772	1	FALSE
1	202074380	202078034	CRIP1P3	ENSG00000227109	8273	202065887	202066106	+	768	6	FALSE	1.74801	4.64791	6.83986e-07	0.00829968	FALSE	-2.12634	4.64799	1.97101e-09	2.43696e-05	FALSE	-1.00637	4.64794	0.00309101	1	FALSE	-2.69779	4.64796	1.83191e-11	2.34869e-07	FALSE	-1.17746	4.64796	0.116046	1	FALSE	2.09733	4.648	2.89588e-12	3.60972e-08	FALSE	-1.70019	4.64773	0.00486739	1	FALSE
1	202131217	202131586	PTPN7	ENSG00000143851	-500	202127246	202130716	-	768	143	TRUE	-0.0945562	5.00815	0.550248	1	FALSE	0.416835	5.0082	0.00211014	1	FALSE	-0.0763919	5.00817	0.648802	1	FALSE	0.190396	5.00819	0.196263	1	FALSE	-1.2861	5.00818	4.35328e-05	0.51569	FALSE	-0.261197	5.00821	0.142559	1	FALSE	-0.0543037	5.00804	0.688165	1	FALSE
1	202317049	202317326	PPP1R12B	ENSG00000077157	-500	202317827	202561834	+	768	597	TRUE	0.477879	7.04235	0.00367919	1	FALSE	-0.898824	7.04235	1.57089e-10	1.97493e-06	TRUE	-0.397183	7.04235	0.00317998	1	FALSE	0.641329	7.04235	4.17343e-06	0.0486121	FALSE	1.16971	7.04235	5.6157e-08	0.000708814	TRUE	-0.484785	7.04235	0.00188312	1	FALSE	0.118021	7.04235	0.53375	1	FALSE
1	202936909	202937305	CYB5R1	ENSG00000159348	-500	202930997	202936408	-	768	1	FALSE	0.553196	4.20113	0.0708795	1	FALSE	-0.471831	4.20116	0.0473066	1	FALSE	-0.215184	4.20114	0.649566	1	FALSE	-0.0630364	4.20115	0.803769	1	FALSE	0.364959	4.20115	0.337015	1	FALSE	0.214581	4.20116	0.404551	1	FALSE	-0.0577446	4.20107	1	1	FALSE
1	202975405	202976013	TMEM183A	ENSG00000163444	-500	202976514	202993976	+	768	180	TRUE	0.147858	5.35336	0.348598	1	FALSE	-0.519694	5.35337	3.77293e-05	0.405553	FALSE	0.322867	5.35336	0.00382051	1	FALSE	-0.45543	5.35337	0.000831797	1	FALSE	-0.0642882	5.35337	0.807309	1	FALSE	0.37697	5.35338	0.00281236	1	FALSE	0.074685	5.35331	0.516397	1	FALSE
1	203243270	203245360	CHIT1	ENSG00000133063	-500	203209458	203242769	-	768	419	TRUE	0.113062	7.81995	0.291706	1	FALSE	-0.190579	7.81998	0.0270946	1	FALSE	0.142177	7.81996	0.0716193	1	FALSE	-0.120576	7.81997	0.20234	1	FALSE	0.14775	7.81997	0.333728	1	FALSE	0.0483576	7.81998	0.625112	1	FALSE	-0.0626707	7.81989	0.65	1	FALSE
1	203245578	203248609	CHIT1	ENSG00000133063	-2808	203209458	203242769	-	768	121	TRUE	0.15063	6.4984	0.227137	1	FALSE	-0.249275	6.49846	0.017904	1	FALSE	0.546906	6.49842	4.67977e-09	5.92271e-05	FALSE	-0.0872854	6.49844	0.448044	1	FALSE	-0.173992	6.49843	0.404481	1	FALSE	-0.323443	6.49847	0.00580539	1	FALSE	-0.363711	6.49823	0.0258373	1	FALSE
1	203254761	203255779	RP11-134P9.3	ENSG00000231507	-500	203256280	203257929	+	768	524	TRUE	0.0145197	6.82023	0.86877	1	FALSE	-0.35355	6.82026	0.00127858	1	FALSE	0.650162	6.82024	1.21949e-11	1.584e-07	FALSE	0.171734	6.82025	0.130633	1	FALSE	-0.288514	6.82025	0.163111	1	FALSE	-0.826881	6.82026	3.20384e-11	3.95546e-07	TRUE	0.000381914	6.82018	0.923262	1	FALSE
1	203288728	203298793	RNU6-487P	ENSG00000202300	-500	203288124	203288227	-	768	523	TRUE	0.989653	9.74261	2.02795e-12	2.64648e-08	TRUE	-1.14886	9.74263	7.96954e-20	1.05867e-15	TRUE	-0.533142	9.74262	1.04774e-05	0.122083	FALSE	0.0751531	9.74263	0.558306	1	FALSE	0.559196	9.74262	0.00711202	1	FALSE	0.646227	9.74264	4.37437e-07	0.00501872	FALSE	-0.471885	9.74255	0.0129941	1	FALSE
1	203303221	203303881	FMOD	ENSG00000122176	5874	203309756	203320617	-	768	47	TRUE	-0.0351243	4.71564	0.792314	1	FALSE	-0.2977	4.71567	0.0944339	1	FALSE	-0.957806	4.71565	2.09355e-08	0.000262259	TRUE	0.0808238	4.71566	0.629097	1	FALSE	-0.910832	4.71566	0.0233113	1	FALSE	1.34734	4.71567	1.10129e-17	1.41714e-13	TRUE	-0.241743	4.71558	0.262542	1	FALSE
1	203397930	203398827	RP11-435P24.3	ENSG00000271588	-28220	203369394	203369709	-	768	5	FALSE	-1.44302	4.34211	8.31532e-05	0.933145	FALSE	-0.208569	4.34214	0.42593	1	FALSE	0.479444	4.34212	0.0241343	1	FALSE	-0.637513	4.34213	0.0264552	1	FALSE	1.89239	4.34213	2.66626e-09	3.41304e-05	FALSE	-0.0822692	4.34215	0.711292	1	FALSE	-1.10415	4.34202	0.00865677	1	FALSE
1	203594488	203595188	ATP2B4	ENSG00000058668	-500	203595689	203713209	+	768	5	FALSE	0.689307	4.28609	0.00223837	1	FALSE	-0.906093	4.28611	7.40204e-06	0.0824735	FALSE	0.196249	4.2861	0.26754	1	FALSE	-0.722705	4.2861	0.00278979	1	FALSE	0.452899	4.2861	0.169879	1	FALSE	0.485217	4.28611	0.0154942	1	FALSE	-0.19597	4.28605	0.617283	1	FALSE
1	203720545	203726339	ATP2B4	ENSG00000058668	7335	203595689	203713209	+	768	256	TRUE	1.311	7.99029	3.36199e-33	4.51213e-29	TRUE	-0.41917	7.99032	7.0881e-05	0.749425	FALSE	0.425274	7.9903	7.28941e-06	0.0854975	FALSE	-0.843231	7.99031	5.41603e-13	7.03055e-09	TRUE	-0.627941	7.99031	0.00183449	1	FALSE	-0.60849	7.99032	3.15165e-07	0.00363354	FALSE	-0.135789	7.99023	0.401946	1	FALSE
1	203730667	203733803	LAX1	ENSG00000122188	-500	203734304	203745245	+	768	54	TRUE	1.07685	6.03969	1.08841e-19	1.44987e-15	TRUE	-0.212056	6.03977	0.0597579	1	FALSE	0.0393169	6.03972	0.663248	1	FALSE	-0.742021	6.03974	7.19089e-09	8.9541e-05	TRUE	-0.201952	6.03973	0.321049	1	FALSE	-0.238941	6.03978	0.042491	1	FALSE	0.120962	6.0395	0.438503	1	FALSE
1	203758430	203760122	ZC3H11A	ENSG00000058673	-4659	203764782	203771301	+	768	66	TRUE	0.279814	5.58628	0.0430411	1	FALSE	0.471664	5.58631	9.19002e-06	0.102018	FALSE	0.266668	5.58629	0.0127547	1	FALSE	-0.416372	5.5863	0.000745422	1	FALSE	-0.537823	5.5863	0.0193696	1	FALSE	-0.797788	5.58632	3.62532e-08	0.00042815	TRUE	-0.0972666	5.5862	0.505821	1	FALSE
1	203763809	203764281	ZC3H11A	ENSG00000058673	-500	203764782	203771301	+	768	12	FALSE	-0.420968	4.45743	0.0659304	1	FALSE	0.276847	4.45745	0.123048	1	FALSE	0.0595218	4.45744	0.660376	1	FALSE	-0.811287	4.45744	4.89416e-05	0.543692	FALSE	-0.479018	4.45744	0.171148	1	FALSE	0.625667	4.45745	0.000727777	1	FALSE	0.0660069	4.4574	0.731292	1	FALSE
1	203830083	203830230	SNRPE	ENSG00000182004	-500	203830731	203839209	+	768	86	TRUE	-0.311856	4.46019	0.26043	1	FALSE	0.0713084	4.46019	0.876611	1	FALSE	-0.341691	4.46019	0.0639019	1	FALSE	-0.742821	4.46019	0.000656053	1	FALSE	0.208974	4.46019	0.605844	1	FALSE	1.05453	4.46019	3.45332e-10	4.22099e-06	TRUE	-0.281718	4.46019	0.289693	1	FALSE
1	203970163	203970857	AC096645.1	ENSG00000211554	-1691	203968373	203968471	-	768	0	FALSE	0.104421	4.14693	0.463804	1	FALSE	-0.0649612	4.14693	1	1	FALSE	0.00860463	4.14693	1	1	FALSE	0.219702	4.14693	0.425994	1	FALSE	-0.217072	4.14693	0.444194	1	FALSE	0.0384443	4.14693	1	1	FALSE	-0.440121	4.14695	0.169105	1	FALSE
1	204464353	204466031	PIK3C2B	ENSG00000133056	-500	204438538	204463852	-	768	624	TRUE	-0.255386	8.20487	0.0517783	1	FALSE	-0.190306	8.20487	0.049994	1	FALSE	-0.670021	8.20487	2.1939e-12	2.86501e-08	FALSE	0.0919965	8.20487	0.376303	1	FALSE	-0.688072	8.20487	0.000428842	1	FALSE	1.0022	8.20487	6.33827e-26	8.3361e-22	TRUE	0.118242	8.20488	0.407551	1	FALSE
1	204474635	204477765	MDM4	ENSG00000198625	-7745	204485511	204501778	+	768	643	TRUE	0.176705	8.92466	0.110069	1	FALSE	-0.226927	8.92467	0.0114801	1	FALSE	0.458164	8.92467	1.85992e-08	0.000233122	FALSE	0.379848	8.92467	4.81879e-05	0.535512	FALSE	0.0500516	8.92467	0.729711	1	FALSE	-1.16201	8.92467	3.94908e-30	5.2274e-26	TRUE	-0.21886	8.92466	0.112062	1	FALSE
1	204481529	204484082	MDM4	ENSG00000198625	-1428	204485511	204501778	+	768	155	TRUE	0.316181	6.60655	0.00839135	1	FALSE	-0.763681	6.60662	4.1939e-14	5.44074e-10	TRUE	0.135216	6.60658	0.127116	1	FALSE	0.013557	6.6066	0.863656	1	FALSE	0.750216	6.60659	3.04342e-06	0.037288	FALSE	-0.0435012	6.60663	0.661261	1	FALSE	0.0718205	6.6064	0.593003	1	FALSE
1	204484163	204485010	MDM4	ENSG00000198625	-500	204485511	204501778	+	768	599	TRUE	-0.38669	7.1373	0.0102178	1	FALSE	-0.422124	7.13731	0.000157301	1	FALSE	0.259022	7.1373	0.0122588	1	FALSE	-0.567237	7.13731	6.02124e-06	0.0697681	FALSE	0.0582469	7.13731	0.734293	1	FALSE	0.780588	7.13731	8.03467e-12	9.96942e-08	TRUE	-0.0743182	7.13727	0.683968	1	FALSE
1	204547872	204549392	MDM4	ENSG00000198625	5000	204485534	204542871	+	768	767	TRUE	0.0814873	9.85844	0.392617	1	FALSE	0.0302548	9.85844	0.688326	1	FALSE	0.287734	9.85844	5.34459e-05	0.603618	FALSE	-0.260154	9.85844	0.00239774	1	FALSE	0.467226	9.85844	0.000370354	1	FALSE	-0.370729	9.85844	2.21693e-05	0.240537	FALSE	-0.219974	9.85843	0.0551577	1	FALSE
1	204553395	204554411	MDM4	ENSG00000198625	10523	204485534	204542871	+	768	5	FALSE	-0.423337	4.74063	0.0684284	1	FALSE	0.590289	4.74066	7.8818e-05	0.830427	FALSE	0.607526	4.74064	1.84032e-05	0.212244	FALSE	-1.07136	4.74065	3.39655e-08	0.000417742	FALSE	-0.133027	4.74065	0.838025	1	FALSE	-0.365845	4.74066	0.0296188	1	FALSE	-0.408937	4.74057	0.0884541	1	FALSE
1	204655362	204656524	LRRN2	ENSG00000170382	-500	204586298	204654861	-	768	85	TRUE	0.0894286	5.42966	0.663652	1	FALSE	-0.0702207	5.42979	0.785245	1	FALSE	0.589331	5.42971	1.23504e-05	0.143548	FALSE	-0.180627	5.42975	0.272685	1	FALSE	0.090098	5.42973	0.720092	1	FALSE	-0.680251	5.42981	0.000135485	1	FALSE	-0.301212	5.42936	0.173841	1	FALSE
1	204659660	204662999	LRRN2	ENSG00000170382	-4798	204586298	204654861	-	768	83	TRUE	-0.0467516	6.32954	0.784912	1	FALSE	-0.101284	6.32959	0.412125	1	FALSE	0.648946	6.32956	1.75707e-11	2.27945e-07	FALSE	-0.0512231	6.32958	0.680971	1	FALSE	-0.0465929	6.32957	0.92747	1	FALSE	-0.711929	6.3296	1.26453e-08	0.000150821	TRUE	-0.310105	6.32941	0.0530476	1	FALSE
1	204677059	204677400	RNA5SP75	ENSG00000252650	-500	204676448	204676558	-	768	685	TRUE	0.306691	8.80465	0.0881024	1	FALSE	-0.00137001	8.80467	0.98672	1	FALSE	0.858095	8.80466	3.94432e-11	5.10238e-07	TRUE	0.226616	8.80466	0.14151	1	FALSE	-0.423787	8.80466	0.144271	1	FALSE	-2.51818	8.80467	2.65333e-44	3.54644e-40	TRUE	-0.717267	8.80462	0.00192456	1	FALSE
1	204678922	204685350	RNA5SP75	ENSG00000252650	-2363	204676448	204676558	-	768	682	TRUE	0.603487	10.9754	5.94287e-05	0.672614	FALSE	-0.187677	10.9754	0.136522	1	FALSE	0.755581	10.9754	1.308e-11	1.69856e-07	TRUE	0.0631498	10.9754	0.626167	1	FALSE	-0.505283	10.9754	0.040165	1	FALSE	-1.96978	10.9754	4.04419e-39	5.39373e-35	TRUE	-0.296537	10.9754	0.123775	1	FALSE
1	204732406	204733360	SCARNA20	ENSG00000251861	35171	204697119	204697234	+	768	0	FALSE	0.194399	4.14974	0.670861	1	FALSE	-0.22518	4.14975	0.434584	1	FALSE	0.0191149	4.14974	0.819987	1	FALSE	-0.515378	4.14975	0.0311896	1	FALSE	0.555244	4.14975	0.0616551	1	FALSE	0.155558	4.14975	0.572236	1	FALSE	0.228065	4.14971	0.645072	1	FALSE
1	204764065	204764674	NFASC	ENSG00000163531	-33104	204797779	204980052	+	768	1	FALSE	-0.211758	4.13662	0.630499	1	FALSE	0.0377946	4.13663	0.939404	1	FALSE	0.242419	4.13662	0.17378	1	FALSE	-0.00127902	4.13662	1	1	FALSE	-0.327211	4.13662	0.671752	1	FALSE	0.0644435	4.13663	0.814433	1	FALSE	-0.333642	4.13662	0.333446	1	FALSE
1	204775909	204776950	NFASC	ENSG00000163531	-20828	204797779	204980052	+	768	0	FALSE	-0.20445	4.17922	0.861594	1	FALSE	0.00924849	4.17924	1	1	FALSE	0.77219	4.17923	1.39421e-05	0.161742	FALSE	-0.632839	4.17923	0.00243227	1	FALSE	-0.316775	4.17923	0.339295	1	FALSE	-0.434515	4.17924	0.120565	1	FALSE	0.0336607	4.17919	1	1	FALSE
1	204777343	204777800	NFASC	ENSG00000163531	-19978	204797779	204980052	+	768	0	FALSE	-0.0690213	4.12797	1	1	FALSE	0.197349	4.12797	0.179953	1	FALSE	-0.233961	4.12797	0.0880605	1	FALSE	0.0691599	4.12797	0.713785	1	FALSE	0.459631	4.12797	0.242963	1	FALSE	-0.0965643	4.12797	0.858831	1	FALSE	-0.19792	4.12797	0.7162	1	FALSE
1	205091644	205092417	RBBP5	ENSG00000117222	-500	205055270	205091143	-	768	239	TRUE	0.0332019	5.27238	0.870834	1	FALSE	-0.0104542	5.27244	1	1	FALSE	0.24678	5.2724	0.0249951	1	FALSE	-1.18112	5.27242	2.94912e-17	3.89461e-13	TRUE	0.774407	5.27241	5.94115e-05	0.69957	FALSE	0.397821	5.27245	0.00250836	1	FALSE	-0.425326	5.27222	0.0237526	1	FALSE
1	205093578	205094340	RBBP5	ENSG00000117222	-2434	205055270	205091143	-	768	36	FALSE	-0.390578	4.80597	0.0249778	1	FALSE	0.27213	4.806	0.0552167	1	FALSE	0.186953	4.80598	0.124037	1	FALSE	-0.69774	4.80599	1.79908e-05	0.204412	FALSE	0.481078	4.80599	0.0232317	1	FALSE	0.253249	4.80601	0.138849	1	FALSE	-0.389639	4.80588	0.100744	1	FALSE
1	205181228	205182073	DSTYK	ENSG00000133059	-500	205111632	205180727	-	768	3	FALSE	1.05677	4.46651	6.57479e-10	8.39666e-06	FALSE	-0.63404	4.46657	0.000743402	1	FALSE	0.0584669	4.46653	0.608561	1	FALSE	-0.373643	4.46655	0.0382563	1	FALSE	0.942691	4.46655	5.08032e-05	0.599782	FALSE	-0.614099	4.46658	0.00362708	1	FALSE	-0.265148	4.46635	0.353158	1	FALSE
1	205196328	205196803	TMCC2	ENSG00000133069	-500	205197304	205242471	+	768	5	FALSE	0.59368	4.17241	0.0353179	1	FALSE	-0.542051	4.17244	0.0090344	1	FALSE	-0.560289	4.17242	0.0104261	1	FALSE	-0.523608	4.17243	0.0687356	1	FALSE	2.12587	4.17243	1.45652e-15	1.91838e-11	FALSE	-0.0843058	4.17244	0.894281	1	FALSE	-0.82459	4.17235	0.0199828	1	FALSE
1	205248047	205250551	TMCC2	ENSG00000133069	5575	205226359	205242471	+	768	13	FALSE	0.304993	5.69876	0.0224576	1	FALSE	-0.479598	5.69885	3.38076e-05	0.364784	FALSE	0.16775	5.69879	0.0791429	1	FALSE	-0.257996	5.69882	0.0431114	1	FALSE	0.463142	5.69881	0.00945817	1	FALSE	0.117611	5.69886	0.42867	1	FALSE	-0.0195497	5.69855	0.884244	1	FALSE
1	205250668	205258779	TMCC2	ENSG00000133069	8196	205226359	205242471	+	768	120	TRUE	0.586037	8.02911	7.98448e-07	0.0096724	FALSE	-0.89197	8.02915	5.09359e-19	6.74697e-15	TRUE	-0.186111	8.02913	0.0560436	1	FALSE	0.379378	8.02914	0.000240648	1	FALSE	0.486636	8.02913	0.00411447	1	FALSE	0.0438459	8.02915	0.693635	1	FALSE	-0.0313742	8.02903	0.838607	1	FALSE
1	205291384	205291452	NUAK2	ENSG00000163545	-500	205271187	205290883	-	768	19	FALSE	-0.323752	4.17865	0.364007	1	FALSE	-0.558641	4.17867	0.012673	1	FALSE	-0.144361	4.17866	0.572247	1	FALSE	-0.0199996	4.17866	1	1	FALSE	-0.017881	4.17866	1	1	FALSE	1.01788	4.17867	4.24153e-06	0.0472295	FALSE	-0.385889	4.17862	0.24627	1	FALSE
1	205293551	205294769	NUAK2	ENSG00000163545	-2667	205271187	205290883	-	768	162	TRUE	-0.678836	6.06305	1.57045e-07	0.0019359	FALSE	-0.00254673	6.06302	0.987647	1	FALSE	-0.0921742	6.06304	0.270431	1	FALSE	0.0177494	6.06303	0.831932	1	FALSE	0.283723	6.06303	0.0629163	1	FALSE	0.524325	6.06302	1.4018e-07	0.00163155	FALSE	-0.301993	6.0631	0.0350974	1	FALSE
1	205449419	205451010	RP11-576D8.4	ENSG00000224717	11266	205425057	205438152	+	768	1	FALSE	0.0744416	4.257	0.899314	1	FALSE	-0.133204	4.25707	0.676393	1	FALSE	-0.817704	4.25702	0.000831297	1	FALSE	-0.0899879	4.25704	0.821451	1	FALSE	1.71958	4.25704	2.68537e-09	3.437e-05	FALSE	-0.456283	4.25708	0.125914	1	FALSE	0.359884	4.25682	0.315168	1	FALSE
1	205473125	205473222	CDK18	ENSG00000117266	-500	205473723	205500506	+	768	17	FALSE	0.0283365	4.18514	1	1	FALSE	-0.0415369	4.18516	1	1	FALSE	0.0979414	4.18515	0.527911	1	FALSE	0.503077	4.18516	0.00884315	1	FALSE	-0.23033	4.18516	0.58449	1	FALSE	-0.550364	4.18517	0.0241406	1	FALSE	-0.336717	4.1851	0.3247	1	FALSE
1	205601591	205602140	ELK4	ENSG00000158711	-500	205588396	205601090	-	768	759	TRUE	0.271945	7.9292	0.000935579	1	FALSE	-0.338978	7.92921	5.52818e-07	0.00643646	FALSE	0.194842	7.9292	0.00179803	1	FALSE	0.17446	7.9292	0.0134254	1	FALSE	0.351818	7.9292	0.0023476	1	FALSE	-0.335195	7.92921	7.62975e-06	0.08424	FALSE	-0.231027	7.92917	0.0211851	1	FALSE
1	205719905	205720154	NUCKS1	ENSG00000069275	-500	205681947	205719404	-	768	72	TRUE	0.65912	4.62617	0.000160311	1	FALSE	-0.719834	4.62622	8.38321e-06	0.0932045	FALSE	-0.117209	4.62619	0.539183	1	FALSE	-0.544552	4.62621	0.00304669	1	FALSE	-0.644592	4.6262	0.0348004	1	FALSE	0.937183	4.62623	9.21183e-10	1.11868e-05	TRUE	-0.186063	4.62603	0.429663	1	FALSE
1	205783377	205783464	SLC41A1	ENSG00000133065	-500	205779427	205782876	-	768	268	TRUE	0.300225	4.95444	0.150001	1	FALSE	-0.627515	4.95449	0.000168255	1	FALSE	0.177096	4.95446	0.220577	1	FALSE	-1.06391	4.95448	1.28414e-08	0.00015913	TRUE	0.857666	4.95447	0.00073323	1	FALSE	0.841475	4.9545	1.07533e-07	0.00125437	TRUE	-0.814194	4.95433	0.00324563	1	FALSE
1	206083621	206091312	RP11-312O7.2	ENSG00000229874	43980	206135293	206137828	-	768	5	FALSE	0.0694628	5.62171	0.658148	1	FALSE	-0.414519	5.62177	0.00180043	1	FALSE	-0.327527	5.62173	0.0114135	1	FALSE	-0.0516602	5.62175	0.823386	1	FALSE	1.28357	5.62174	3.21858e-11	4.17321e-07	FALSE	0.172672	5.62178	0.281026	1	FALSE	0.0228044	5.62157	0.954992	1	FALSE
1	206095862	206103327	RP11-312O7.2	ENSG00000229874	31965	206135293	206137828	-	768	11	FALSE	0.163235	6.06129	0.284217	1	FALSE	-0.509863	6.06135	4.56767e-05	0.48874	FALSE	-0.175066	6.06131	0.155877	1	FALSE	-0.258817	6.06133	0.0717949	1	FALSE	1.64651	6.06132	4.05978e-21	5.3922e-17	FALSE	-0.0486812	6.06136	0.661702	1	FALSE	-0.0509254	6.06113	0.794551	1	FALSE
1	206115209	206116823	RP11-312O7.2	ENSG00000229874	18469	206135293	206137828	-	768	28	FALSE	-0.253673	4.84783	0.310785	1	FALSE	-0.876186	4.84786	1.80477e-05	0.197586	FALSE	-0.136002	4.84784	0.489316	1	FALSE	-0.842457	4.84785	0.000228119	1	FALSE	2.72743	4.84785	2.42822e-38	3.24823e-34	FALSE	0.00338218	4.84787	0.950739	1	FALSE	-0.783259	4.84774	0.00974054	1	FALSE
1	206173141	206173864	RP11-38J22.2	ENSG00000225483	-6189	206180054	206180443	+	768	1	FALSE	0.370766	4.19505	0.216014	1	FALSE	0.195011	4.19505	0.333609	1	FALSE	0.0712673	4.19505	0.751392	1	FALSE	-0.634078	4.19505	0.0185028	1	FALSE	0.275218	4.19505	0.461207	1	FALSE	-0.00157359	4.19505	1	1	FALSE	-0.397309	4.19504	0.225889	1	FALSE
1	206306632	206307508	RP11-38J22.6	ENSG00000240754	-500	206296385	206306131	-	768	43	TRUE	-2.23276	4.70509	8.54914e-10	1.0907e-05	TRUE	1.50857	4.70521	9.19677e-14	1.19061e-09	TRUE	-0.371795	4.70513	0.120811	1	FALSE	-1.01715	4.70517	0.00037085	1	FALSE	0.860436	4.70516	0.0209937	1	FALSE	-0.692486	4.70522	0.0108028	1	FALSE	-0.12364	4.70479	0.78593	1	FALSE
1	206499434	206500262	RP11-421E17.4	ENSG00000229509	6415	206506678	206506789	-	768	5	FALSE	-0.123239	4.55487	0.763893	1	FALSE	-0.373313	4.55488	0.0268943	1	FALSE	0.314224	4.55487	0.046015	1	FALSE	-0.498961	4.55488	0.0198304	1	FALSE	1.01457	4.55488	8.43094e-05	0.986082	FALSE	0.244631	4.55489	0.250253	1	FALSE	-0.457799	4.55482	0.0533727	1	FALSE
1	206642863	206643290	IKBKE	ENSG00000143466	-500	206643791	206670223	+	768	7	FALSE	-0.271524	4.1711	0.520518	1	FALSE	0.00346634	4.17111	1	1	FALSE	-0.278289	4.1711	0.191381	1	FALSE	-0.411003	4.17111	0.0987763	1	FALSE	1.26237	4.1711	4.5565e-05	0.539216	FALSE	-0.00529395	4.17111	1	1	FALSE	0.358553	4.17107	0.375186	1	FALSE
1	206786405	206786456	EIF2D	ENSG00000143486	-500	206764977	206785904	-	768	72	TRUE	0.229581	4.24274	0.526901	1	FALSE	-0.328535	4.24274	0.141812	1	FALSE	0.331063	4.24274	0.0620358	1	FALSE	-0.430355	4.24274	0.122514	1	FALSE	0.202613	4.24274	0.973509	1	FALSE	0.130929	4.24274	0.547389	1	FALSE	-0.188325	4.24274	0.761148	1	FALSE
1	206912629	206913823	MAPKAPK2	ENSG00000162889	5000	206858382	206907628	+	768	589	TRUE	0.297918	7.92667	0.0536648	1	FALSE	0.818429	7.92667	8.22378e-13	1.05799e-08	TRUE	0.361472	7.92667	0.00190375	1	FALSE	-1.00901	7.92667	3.9093e-12	5.04573e-08	TRUE	-1.5981	7.92667	3.24125e-09	4.14589e-05	TRUE	-0.736642	7.92668	5.42499e-07	0.00620782	TRUE	-0.325273	7.92664	0.0934393	1	FALSE
1	206915641	206916324	Y_RNA	ENSG00000199349	5000	206921325	206921437	-	768	597	TRUE	0.266012	7.33789	0.0881111	1	FALSE	0.768771	7.33791	3.44431e-11	4.36773e-07	TRUE	0.323675	7.3379	0.00593256	1	FALSE	-1.05253	7.3379	7.93102e-13	1.02865e-08	TRUE	-1.59439	7.3379	3.9126e-09	5.00109e-05	TRUE	-0.410078	7.33791	0.00527847	1	FALSE	-0.429866	7.33785	0.0271746	1	FALSE
1	206955660	206959186	IL10	ENSG00000136634	-9820	206940947	206945839	-	768	26	FALSE	0.362909	5.46076	0.121935	1	FALSE	0.628748	5.46086	0.00037898	1	FALSE	-0.999055	5.46079	1.85893e-07	0.00228871	FALSE	-2.15993	5.46082	8.647e-19	1.14651e-14	FALSE	0.601773	5.46081	0.0564678	1	FALSE	0.995461	5.46087	1.90572e-07	0.00221045	FALSE	-0.561667	5.46053	0.073104	1	FALSE
1	206963880	206964834	IL19	ENSG00000142224	-7380	206972215	207016324	+	768	26	FALSE	-0.154682	4.67474	0.514322	1	FALSE	0.866886	4.67478	7.8806e-06	0.087719	FALSE	-1.11341	4.67476	3.58036e-07	0.00438415	FALSE	-2.17325	4.67477	8.06473e-16	1.06067e-11	FALSE	-0.457229	4.67476	0.280575	1	FALSE	1.36017	4.67478	2.00106e-11	2.47331e-07	FALSE	-0.51402	4.67467	0.13908	1	FALSE
1	207494068	207494352	CD55	ENSG00000196352	-500	207494853	207534311	+	768	316	TRUE	0.321809	5.64506	0.0295862	1	FALSE	0.124632	5.64513	0.252397	1	FALSE	0.232648	5.64508	0.0279436	1	FALSE	-0.427722	5.64511	0.00220311	1	FALSE	0.297389	5.6451	0.160622	1	FALSE	-0.844547	5.64514	1.02918e-09	1.24921e-05	TRUE	0.32424	5.64488	0.068204	1	FALSE
1	207923885	207924901	CD46	ENSG00000117335	-500	207925402	207968858	+	768	418	TRUE	0.915321	6.90169	2.14069e-10	2.74971e-06	TRUE	-0.815936	6.90179	2.15866e-10	2.70808e-06	TRUE	0.431513	6.90172	0.000141846	1	FALSE	-0.220719	6.90176	0.108275	1	FALSE	-0.424343	6.90175	0.0684591	1	FALSE	-0.266479	6.9018	0.0639186	1	FALSE	-0.0580329	6.90144	0.823922	1	FALSE
1	208115270	208116208	CD34	ENSG00000174059	-30522	208059884	208084747	-	768	1	FALSE	0.508362	4.25866	0.0883522	1	FALSE	0.0685833	4.25867	0.806719	1	FALSE	0.0621371	4.25866	0.66229	1	FALSE	-0.597094	4.25866	0.0388326	1	FALSE	-0.0634865	4.25866	1	1	FALSE	0.293361	4.25867	0.269786	1	FALSE	-0.836522	4.25865	0.033145	1	FALSE
1	208136232	208137741	CD34	ENSG00000174059	-51484	208059884	208084747	-	768	28	FALSE	1.70268	5.15351	1.88887e-26	2.53052e-22	FALSE	-1.38974	5.15374	3.27334e-14	4.24946e-10	FALSE	0.0566675	5.1536	0.605491	1	FALSE	-0.201469	5.15367	0.268154	1	FALSE	0.811826	5.15364	0.00187646	1	FALSE	-0.723128	5.15377	0.000263743	1	FALSE	-1.05685	5.15296	0.000121249	1	FALSE
1	208181124	208181737	PLXNA2	ENSG00000076356	13849	208195587	208417665	-	768	0	FALSE	0.0300512	4.12441	1	1	FALSE	-0.0903351	4.12442	0.822795	1	FALSE	-0.0314889	4.12441	1	1	FALSE	-0.168459	4.12442	0.434481	1	FALSE	1.01288	4.12441	0.00022237	1	FALSE	-0.164544	4.12442	0.478933	1	FALSE	-0.152703	4.1244	0.959441	1	FALSE
1	208418166	208418985	PLXNA2	ENSG00000076356	-500	208195587	208417665	-	768	357	TRUE	1.8132	7.31688	1.24913e-24	1.67196e-20	TRUE	-0.448137	7.3169	0.0100313	1	FALSE	-0.887926	7.31689	2.66123e-07	0.00326746	TRUE	-1.26258	7.31689	4.95222e-10	6.26109e-06	TRUE	1.02357	7.31689	0.000190934	1	FALSE	0.220482	7.3169	0.224967	1	FALSE	-0.85268	7.31684	0.00189974	1	FALSE
1	209072204	209073194	RP5-1051D14.1	ENSG00000236950	-72604	209145799	209148652	+	768	17	FALSE	-0.754599	4.45181	0.00289697	1	FALSE	-0.181601	4.45183	0.371014	1	FALSE	-0.166094	4.45182	0.429445	1	FALSE	-0.571857	4.45183	0.014235	1	FALSE	1.4382	4.45182	5.10532e-07	0.00635101	FALSE	0.0955743	4.45184	0.697286	1	FALSE	0.762696	4.45176	0.0032152	1	FALSE
1	209140463	209141763	RP5-1051D14.1	ENSG00000236950	-4035	209145799	209148652	+	768	14	FALSE	-0.0390956	4.70968	0.836671	1	FALSE	0.0132003	4.70978	1	1	FALSE	-0.316085	4.70972	0.0758222	1	FALSE	-0.598212	4.70975	0.00328969	1	FALSE	1.46507	4.70974	1.94695e-10	2.51565e-06	FALSE	0.188254	4.70979	0.295165	1	FALSE	-0.265439	4.70945	0.320707	1	FALSE
1	209161600	209163011	RP5-1051D14.1	ENSG00000236950	12947	209145799	209148652	+	768	22	FALSE	-0.074607	4.80238	0.637625	1	FALSE	-0.207625	4.80244	0.182635	1	FALSE	-0.171402	4.8024	0.352556	1	FALSE	-0.664861	4.80242	0.000962193	1	FALSE	1.59691	4.80242	5.86147e-12	7.62812e-08	FALSE	-0.0438665	4.80245	0.878485	1	FALSE	0.302764	4.80223	0.215791	1	FALSE
1	209211451	209213389	RP5-1051D14.1	ENSG00000236950	62798	209145799	209148652	+	768	228	TRUE	-1.28131	6.76752	3.88695e-08	0.00048447	TRUE	0.394348	6.76754	0.0111031	1	FALSE	-0.38957	6.76753	0.015088	1	FALSE	-0.870031	6.76754	4.47998e-06	0.052138	FALSE	1.53305	6.76754	3.32302e-10	4.2877e-06	TRUE	0.27675	6.76755	0.115295	1	FALSE	0.238905	6.76748	0.288801	1	FALSE
1	209241578	209242892	RP11-385M4.1	ENSG00000232537	77719	209320612	209328446	-	768	13	FALSE	-0.745599	4.6874	0.00361432	1	FALSE	0.304283	4.68746	0.112325	1	FALSE	-0.281172	4.68742	0.1297	1	FALSE	-0.350506	4.68744	0.131171	1	FALSE	1.42498	4.68743	5.01071e-08	0.000632953	FALSE	-0.22367	4.68746	0.287938	1	FALSE	0.202258	4.68726	0.465117	1	FALSE
1	209249643	209250778	RP11-385M4.1	ENSG00000232537	69833	209320612	209328446	-	768	3	FALSE	-0.61295	4.51605	0.019958	1	FALSE	0.466192	4.51609	0.0193641	1	FALSE	-0.209025	4.51607	0.402577	1	FALSE	-0.639252	4.51608	0.0121891	1	FALSE	1.34156	4.51607	1.08244e-05	0.13077	FALSE	-0.412629	4.51609	0.109057	1	FALSE	0.310905	4.51596	0.349941	1	FALSE
1	209259628	209262240	RP11-385M4.1	ENSG00000232537	58371	209320612	209328446	-	768	1	FALSE	-0.533907	4.89239	0.0296408	1	FALSE	-0.688599	4.89251	0.000192892	1	FALSE	-0.346322	4.89243	0.0658504	1	FALSE	-0.404701	4.89247	0.0721902	1	FALSE	2.04205	4.89246	2.51428e-19	3.33343e-15	FALSE	0.445752	4.89253	0.0196777	1	FALSE	-0.133029	4.89209	0.552555	1	FALSE
1	209265028	209266023	RP11-385M4.1	ENSG00000232537	54588	209320612	209328446	-	768	35	FALSE	-0.350417	5.1108	0.0776233	1	FALSE	-0.246411	5.11086	0.116411	1	FALSE	0.212056	5.11082	0.143018	1	FALSE	-0.665203	5.11084	0.000356875	1	FALSE	1.37409	5.11083	1.8604e-09	2.38634e-05	FALSE	-0.213331	5.11086	0.243545	1	FALSE	0.386149	5.11067	0.0840567	1	FALSE
1	209266078	209266448	RP11-385M4.1	ENSG00000232537	54163	209320612	209328446	-	768	123	TRUE	-0.46332	4.97449	0.0357539	1	FALSE	-0.203408	4.97453	0.229534	1	FALSE	0.190565	4.9745	0.234611	1	FALSE	-0.789202	4.97452	0.000283138	1	FALSE	1.48074	4.97451	3.09853e-09	3.96426e-05	TRUE	0.0602347	4.97453	0.829441	1	FALSE	0.0676268	4.97438	0.829083	1	FALSE
1	209275047	209278639	RP11-385M4.1	ENSG00000232537	41972	209320612	209328446	-	768	490	TRUE	-0.415506	9.73687	0.0455842	1	FALSE	-0.898538	9.73687	1.25378e-08	0.000152372	TRUE	1.18678	9.73687	1.6232e-19	2.16762e-15	TRUE	-0.970147	9.73687	4.89572e-08	0.000600019	TRUE	1.35036	9.73687	1.061e-08	0.000135161	TRUE	-0.581707	9.73687	0.00113242	1	FALSE	-0.307512	9.73686	0.196511	1	FALSE
1	209278890	209286718	RP11-385M4.1	ENSG00000232537	33893	209320612	209328446	-	768	758	TRUE	-0.0962904	13.0763	0.575267	1	FALSE	-0.690971	13.0764	7.01028e-08	0.000837308	FALSE	0.710242	13.0764	3.15227e-10	4.04783e-06	TRUE	-1.07548	13.0764	1.50169e-13	1.9561e-09	TRUE	1.55057	13.0764	1.3507e-16	1.78306e-12	TRUE	-0.309997	13.0764	0.0323212	1	FALSE	-0.0585186	13.0763	0.779319	1	FALSE
1	209304547	209308915	RP11-385M4.1	ENSG00000232537	11696	209320612	209328446	-	768	718	TRUE	-0.635507	11.3398	0.000112764	1	FALSE	-0.294715	11.3398	0.0153282	1	FALSE	0.231618	11.3398	0.0400504	1	FALSE	-1.07632	11.3398	1.14429e-14	1.49823e-10	TRUE	1.4935	11.3398	1.65545e-16	2.18503e-12	TRUE	0.389731	11.3398	0.00253894	1	FALSE	-0.03081	11.3398	0.889274	1	FALSE
1	209341672	209342181	RP11-385M4.2	ENSG00000228081	-4177	209346359	209346720	+	768	0	FALSE	-0.0666278	4.11963	1	1	FALSE	0.0195716	4.11963	1	1	FALSE	-0.0761274	4.11963	0.706143	1	FALSE	-0.0709134	4.11963	0.982748	1	FALSE	0.403513	4.11963	0.0289018	1	FALSE	-0.0686694	4.11963	1	1	FALSE	0.13133	4.11963	0.579805	1	FALSE
1	209361046	209361484	RP11-385M4.2	ENSG00000228081	14325	209346359	209346720	+	768	1	FALSE	0.321047	4.12357	0.132657	1	FALSE	-0.101041	4.12358	0.935946	1	FALSE	0.0350884	4.12357	1	1	FALSE	-0.186854	4.12357	0.482937	1	FALSE	-0.165603	4.12357	1	1	FALSE	0.044073	4.12358	0.708709	1	FALSE	0.0245596	4.12356	1	1	FALSE
1	209363520	209364776	RP11-385M4.2	ENSG00000228081	16799	209346359	209346720	+	768	1	FALSE	0.0858765	4.18518	1	1	FALSE	0.231855	4.1852	0.28207	1	FALSE	-0.548527	4.18519	0.0138779	1	FALSE	-0.804039	4.18519	0.000277157	1	FALSE	0.584603	4.18519	0.0931223	1	FALSE	0.328614	4.1852	0.206294	1	FALSE	0.544897	4.18513	0.0523928	1	FALSE
1	209380257	209381841	RP11-385M4.3	ENSG00000224540	-23699	209405541	209406764	+	768	7	FALSE	0.0454686	4.41775	0.888167	1	FALSE	-0.236078	4.41782	0.289347	1	FALSE	-0.356768	4.41778	0.111315	1	FALSE	-1.39365	4.4178	1.74538e-07	0.00211522	FALSE	2.34514	4.41779	2.53523e-20	3.36425e-16	FALSE	-0.0275815	4.41783	0.964569	1	FALSE	-0.251346	4.41759	0.557017	1	FALSE
1	209826312	209827963	LAMB3	ENSG00000196878	-500	209788215	209825811	-	768	39	TRUE	-0.881412	5.54925	0.0498625	1	FALSE	-2.12204	5.54936	2.30236e-09	2.84273e-05	TRUE	2.5652	5.54929	1.44163e-24	1.93351e-20	TRUE	-1.73322	5.54932	1.12032e-05	0.1284	FALSE	0.726998	5.54931	0.1405	1	FALSE	-2.17646	5.54937	1.28637e-07	0.00149824	TRUE	-0.375306	5.54897	0.507829	1	FALSE
1	209924324	209925814	TRAF3IP3	ENSG00000009790	-3562	209929377	209953000	+	768	1	FALSE	0.886761	4.37552	7.00623e-05	0.789252	FALSE	-0.471268	4.37555	0.0407621	1	FALSE	-0.461455	4.37553	0.0260269	1	FALSE	0.172182	4.37554	0.461799	1	FALSE	0.998577	4.37554	0.000939289	1	FALSE	-0.737562	4.37556	0.00432294	1	FALSE	0.146461	4.37543	0.716686	1	FALSE
1	209928315	209928876	TRAF3IP3	ENSG00000009790	-500	209929377	209953000	+	768	1	FALSE	0.712454	4.21945	0.00553355	1	FALSE	-0.587458	4.21948	0.0161345	1	FALSE	-0.692214	4.21946	0.000931011	1	FALSE	-0.173159	4.21947	0.497141	1	FALSE	0.558365	4.21946	0.127914	1	FALSE	-0.221272	4.21948	0.483117	1	FALSE	1.09933	4.21938	2.77015e-05	0.366158	FALSE
[truncated: 12,291 more rows]
