# Supplementary material for: Chromatin Accessibility Identifies Regulatory Elements Predictive of Gene Expression and Disease Outcome in Multiple Myeloma
Source: Oxford University Press journal article supplement (doi:10.1158/1078-0432.ccr-20-2931), 2021-03-17
Supplement: 10780432ccr202931-sup-248275_3_supp_6952782_qp7dd6.xlsx [file 10780432ccr202931-sup-248275_3_supp_6952782_qp7dd6.xlsx]

## Sheet: Supp Data 3 v1
Supplementary Data 3. Gene set enrichment analysis of transcribed regulatory elements in CoMMpass.
NAME	SIZE	ES	NES	NOM p-val	FDR q-val	FWER p-val	RANK AT MAX
HALLMARK_PROTEIN_SECRETION	30	0.782501	1.54045	0	0.00704651	0.007	867
HALLMARK_HYPOXIA	58	0.729654	1.46424	0	0.0305677	0.06	1189
HALLMARK_TNFA_SIGNALING_VIA_NFKB	96	0.715676	1.46178	0	0.022394	0.066	1157
HALLMARK_UV_RESPONSE_UP	52	0.717131	1.44072	0.00100301	0.0272122	0.103	1037
HALLMARK_UNFOLDED_PROTEIN_RESPONSE	42	0.713383	1.42328	0.00202634	0.0371771	0.165	1151
HALLMARK_ANDROGEN_RESPONSE	30	0.720533	1.42134	0.0102775	0.032334	0.173	1278
HALLMARK_P53_PATHWAY	70	0.688443	1.39521	0	0.0466871	0.273	1103
HALLMARK_PEROXISOME	28	0.705333	1.38409	0.0165289	0.0512667	0.328	1403
HALLMARK_GLYCOLYSIS	65	0.690967	1.38243	0.00100301	0.0472606	0.341	1393
HALLMARK_MYC_TARGETS_V2	17	0.726552	1.38189	0.0463576	0.0426369	0.342	1253
HALLMARK_TGF_BETA_SIGNALING	24	0.71333	1.37308	0.0303983	0.0454204	0.385	1677
HALLMARK_INTERFERON_GAMMA_RESPONSE	78	0.667147	1.35307	0	0.0580916	0.498	1738
HALLMARK_MTORC1_SIGNALING	65	0.660028	1.34292	0.00400802	0.0634983	0.558	1112
HALLMARK_PI3K_AKT_MTOR_SIGNALING	41	0.658046	1.33682	0.0342742	0.0651305	0.595	1452
HALLMARK_APOPTOSIS	66	0.66409	1.33494	0.00200602	0.0628833	0.607	1105
HALLMARK_MYC_TARGETS_V1	65	0.652678	1.32549	0.01001	0.0677625	0.659	1269
HALLMARK_DNA_REPAIR	41	0.660658	1.32405	0.0273279	0.065209	0.671	1392
HALLMARK_INFLAMMATORY_RESPONSE	73	0.653724	1.32329	0.007	0.0623693	0.676	1249
HALLMARK_IL6_JAK_STAT3_SIGNALING	29	0.663434	1.30194	0.0690722	0.0845895	0.802	1098
HALLMARK_G2M_CHECKPOINT	85	0.636007	1.29418	0.007	0.0895661	0.833	1695
HALLMARK_KRAS_SIGNALING_UP	60	0.638638	1.28583	0.0311558	0.096871	0.878	1460
HALLMARK_UV_RESPONSE_DN	60	0.639568	1.28565	0.0231156	0.0928367	0.879	1115
HALLMARK_ALLOGRAFT_REJECTION	60	0.628638	1.27208	0.0463243	0.109102	0.929	971
HALLMARK_COMPLEMENT	68	0.626523	1.26557	0.039	0.114441	0.951	1249
HALLMARK_COAGULATION	28	0.633536	1.24546	0.141361	0.144951	0.984	981
HALLMARK_KRAS_SIGNALING_DN	42	0.617536	1.23706	0.107724	0.155893	0.989	1373
HALLMARK_INTERFERON_ALPHA_RESPONSE	34	0.620216	1.23605	0.143149	0.151939	0.99	1629
HALLMARK_FATTY_ACID_METABOLISM	42	0.613022	1.23547	0.106383	0.147754	0.991	1215
HALLMARK_XENOBIOTIC_METABOLISM	44	0.60572	1.20342	0.139839	0.209112	1	1403
HALLMARK_IL2_STAT5_SIGNALING	80	0.597437	1.20079	0.0721443	0.207723	1	1177
HALLMARK_ESTROGEN_RESPONSE_LATE	64	0.590979	1.19873	0.119	0.204995	1	1498
HALLMARK_CHOLESTEROL_HOMEOSTASIS	18	0.624238	1.18803	0.263393	0.22285	1	393
HALLMARK_REACTIVE_OXYGEN_SPECIES_PATHWAY	17	0.641026	1.18342	0.243575	0.227266	1	819
HALLMARK_OXIDATIVE_PHOSPHORYLATION	51	0.587294	1.18201	0.163306	0.223844	1	1113
HALLMARK_ESTROGEN_RESPONSE_EARLY	62	0.585349	1.17888	0.145729	0.22394	1	1498
HALLMARK_ADIPOGENESIS	60	0.576278	1.15694	0.180542	0.264107	1	1023
HALLMARK_APICAL_JUNCTION	45	0.574199	1.15546	0.232628	0.260079	1	1043
HALLMARK_BILE_ACID_METABOLISM	25	0.588285	1.14341	0.320459	0.280595	1	1487
HALLMARK_E2F_TARGETS	79	0.555869	1.12364	0.221221	0.317926	1	1686
HALLMARK_MITOTIC_SPINDLE	80	0.556899	1.12272	0.211211	0.31237	1	1770
HALLMARK_EPITHELIAL_MESENCHYMAL_TRANSITION	49	0.549919	1.1108	0.310933	0.331336	1	1177
HALLMARK_HEME_METABOLISM	63	0.504411	1.01304	0.516064	0.544638	1	1451
HALLMARK_MYOGENESIS	35	0.491064	0.971866	0.602459	0.616256	1	1460
HALLMARK_SPERMATOGENESIS	31	0.463503	0.921571	0.666327	0.692514	1	1600

## Sheet: Supp Data 3 v1 - rank list
gene	rank
Y_RNA	322.461
LDB1	322.461
NT5C2	322.461
SMNDC1	322.461
DUSP5	322.461
RP11-73H14.1	322.461
TIAL1	322.461
RP11-47G11.3	322.461
CHST15	322.461
PWWP2B	322.461
snoU13	322.461
DNAJC1	322.461
COMMD3	322.461
OTUD1	322.461
KLF6	322.461
RP11-464C19.2	322.461
SEPT7P9	322.461
ALOX5	322.461
BMS1P1	322.461
BMS1P6	322.461
IL15RA	322.461
RP11-554I8.2	322.461
AKR1B10P1	322.461
DDX21	322.461
SRGN	322.461
DDIT4	322.461
SFMBT2	322.461
SEC24C	322.461
NRG3	322.461
RP11-56M3.1	322.461
PCGF5	322.461
RP11-363N22.2	322.461
TM9SF3	322.461
MIR607	322.461
LCOR	322.461
BIRC2	322.461
MIR4491	322.461
DDX6	322.461
HYOU1	322.461
CALCB	322.461
NLRP6	322.461
ARL14EP	322.461
QSER1	322.461
RHOG	322.461
RNH1	322.461
TIMM10	322.461
CD6	322.461
HRASLS2	322.461
STIP1	322.461
CCDC88B	322.461
ARL2	322.461
NEAT1	322.461
AP000769.1	322.461
RELA	322.461
YIF1A	322.461
RBM14	322.461
RBM4B	322.461
KDM2A	322.461
SSH3	322.461
PPP6R3	322.461
PPFIA1	322.461
ATG16L2	322.461
NEU3	322.461
OR2AT2P	322.461
PSMA2P1	322.461
IGF1	322.461
SLC41A2	322.461
ISCU	322.461
SNORA40	322.461
FAM222A-AS1	322.461
PPTC7	322.461
RAB35	322.461
RPL22P19	322.461
RP11-158L12.5	322.461
GPR19	322.461
CDKN1B	322.461
RNU4-67P	322.461
BHLHE41	322.461
AMN1	322.461
PDZRN4	322.461
ARID2	322.461
RP11-446N19.1	322.461
RP11-493L12.3	322.461
ATF1	322.461
POU6F1	322.461
PAN2	322.461
LEMD3	322.461
VAMP1	322.461
NECAP1	322.461
DUSP6	322.461
RP11-734K2.4	322.461
CLLU1OS	322.461
KRT19P2	322.461
ZMYM5	322.461
ZMYM2	322.461
RPL21	322.461
HMGB1	322.461
NBEA	322.461
UFM1	322.461
SPERT	322.461
FNDC3A	322.461
VPS36	322.461
CKAP2	322.461
SUGT1	322.461
RAP2A	322.461
DOCK9-AS2	322.461
LINC00638	322.461
IGHA2	322.461
IGHG4	322.461
ELK2AP	322.461
IGHG1	322.461
FBXO33	322.461
DNAAF2	322.461
RN7SL2	322.461
ARF6	322.461
SAV1	322.461
WDR89	322.461
PCNX	322.461
TMED10	322.461
FOS	322.461
IRF2BPL	322.461
GTF2A1	322.461
CHSY1	322.461
RP11-382B18.5	322.461
RP11-16E12.1	322.461
KLF13	322.461
RP11-632K20.8	322.461
LINC00984	322.461
CHAC1	322.461
TRIM69	322.461
ADAM10	322.461
USP3	322.461
TLE3	322.461
LMAN1L	322.461
AC113208.1	322.461
UBE2Q2	322.461
AC015871.1	322.461
MESDC1	322.461
WHAMM	322.461
SEC11A	322.461
ZNF592	322.461
FAM174B	322.461
MCTP2	322.461
ZC3H7A	322.461
RP11-645C24.4	322.461
UQCRC2	322.461
SDR42E2	322.461
ZKSCAN2	322.461
TCEB2	322.461
RP11-435I10.5	322.461
RP11-435I10.3	322.461
SULT1A2	322.461
NPIPB9	322.461
MIR3680-2	322.461
RP11-347C12.2	322.461
CD2BP2	322.461
RP11-146F11.2	322.461
HERPUD1	322.461
CBFB	322.461
FAM65A	322.461
ATXN1L	322.461
MON1B	322.461
RP11-118F19.1	322.461
CBFA2T3	322.461
SREBF1	322.461
MIEF2	322.461
AC116407.1	322.461
SLFN13	322.461
ZPBP2	322.461
P2RX1	322.461
LINC00854	322.461
LINC00910	322.461
SLC25A39	322.461
DND1P1	322.461
ARL17A	322.461
SPAG9	322.461
MSI2	322.461
MRPS23	322.461
CLTC	322.461
MED13	322.461
RPL31P57	322.461
LRRC37A3	322.461
SLC16A6P1	322.461
PRKCA	322.461
RP11-147L13.8	322.461
LOC440461	322.461
RP11-147L13.2	322.461
SLC16A11	322.461
NUP85	322.461
SLC25A19	322.461
MFSD11	322.461
KDM6B	322.461
CTD-2526A2.2	322.461
P4HB	322.461
DUS1L	322.461
UTS2R	322.461
ESCO1	322.461
SMAD7	322.461
ME2	322.461
POLI	322.461
RP11-126O1.5	322.461
BCL2	322.461
RP11-674N23.2	322.461
MIR23A	322.461
RFX1	322.461
ATP13A1	322.461
ZNF101	322.461
MKNK2	322.461
C19orf12	322.461
RNU6-967P	322.461
ZNF181	322.461
FAM187B	322.461
HNRNPL	322.461
PSMC4	322.461
MAP3K10	322.461
ZBTB7A	322.461
AC006129.2	322.461
ARHGEF1	322.461
KCNN4	322.461
AP2S1	322.461
SCAF1	322.461
C19orf48	322.461
CNOT3	322.461
ZNF837	322.461
INSR	322.461
TIMM44	322.461
ZNF426	322.461
HENMT1	322.461
PRPF38B	322.461
SRM	322.461
KCNA3	322.461
CD53	322.461
TRIM33	322.461
MAN1A2	322.461
FAM46C	322.461
AL365331.2	322.461
AL390877.1	322.461
RP5-902P8.10	322.461
MRPL20	322.461
PRDM2	322.461
RP11-423O2.7	322.461
ATAD3A	322.461
RP11-495P10.2	322.461
RP11-289I10.2	322.461
RNVU1-18	322.461
RP11-403I13.10	322.461
HIST2H4B	322.461
MCL1	322.461
ENSA	322.461
GATAD2B	322.461
ZBTB7B	322.461
FDPS	322.461
CRABP2	322.461
VDAC1P9	322.461
SLAMF1	322.461
F11R	322.461
DEDD	322.461
RRM2P2	322.461
RNU6-481P	322.461
RP11-122G18.7	322.461
DUSP12	322.461
SLC35E2B	322.461
DDR2	322.461
RNU1-3	322.461
PRDX6	322.461
RNA5SP69	322.461
DHX9	322.461
LAMC1	322.461
CALML6	322.461
PLA2G4A	322.461
CAMSAP2	322.461
PPP1R12B	322.461
PIK3C2B	322.461
MDM4	322.461
RNA5SP75	322.461
ELK4	322.461
MAPKAPK2	322.461
RP11-385M4.1	322.461
PPP2R5A	322.461
SMYD2	322.461
TP53BP2	322.461
RP11-504P24.3	322.461
SDE2	322.461
PARP1	322.461
ARF1	322.461
ZNF496	322.461
SH3BP5L	322.461
ZNF672	322.461
RP3-395M20.9	322.461
SYF2	322.461
ARID1A	322.461
RCC1	322.461
RP1-118J21.24	322.461
NASP	322.461
RNF11	322.461
FAM159A	322.461
USP24	322.461
RP4-794H19.2	322.461
RN7SL854P	322.461
FAM69A	322.461
F3	322.461
SLX4IP	322.461
RRBP1	322.461
XRN2	322.461
PYGB	322.461
RP4-760C5.3	322.461
RP5-1085F17.3	322.461
FER1L4	322.461
SPAG4	322.461
PCIF1	322.461
RP1-148H17.1	322.461
CEBPB	322.461
CTSZ	322.461
CR381653.1	322.461
AP000295.10	322.461
U2AF1	322.461
AP001631.10	322.461
CRYAA	322.461
LINC00322	322.461
AP001046.5	322.461
SIK1	322.461
LINC00319	322.461
AP001055.6	322.461
PTTG1IP	322.461
SLC19A1	322.461
GNB1L	322.461
IGLV3-1	322.461
DERL3	322.461
TUG1	322.461
LGALS1	322.461
TEF	322.461
TOB2	322.461
LL22NC03-121E8.4	322.461
CRELD2	322.461
DENND6B	322.461
ODF3B	322.461
KLF11	322.461
ZC3H6	322.461
CHCHD5	322.461
RP11-480C16.1	322.461
TMEM185B	322.461
WDR33	322.461
LINC01087	322.461
CXCR4	322.461
ACVR2A	322.461
NR4A2	322.461
CYTIP	322.461
RN7SL423P	322.461
SP3	322.461
AC005540.3	322.461
NABP1	322.461
COQ10B	322.461
CFLAR	322.461
FZD7	322.461
BMPR2	322.461
RN7SL140P	322.461
CYP20A1	322.461
SDC1	322.461
RNA5SP86	322.461
RP11-566E18.3	322.461
ARPC2	322.461
DNAJB2	322.461
RHBDD1	322.461
C2orf57	322.461
DTYMK	322.461
ING5	322.461
AC012074.2	322.461
YPEL5	322.461
DPY30	322.461
BIRC6	322.461
QPCT	322.461
FTOP1	322.461
PRKCE	322.461
CRIPT	322.461
EML6	322.461
RPS24P7	322.461
B3GNT2	322.461
SERTAD2	322.461
AC007365.2	322.461
SLC1A4	322.461
AC007386.4	322.461
CEP68	322.461
RAB1A	322.461
FNBP1P1	322.461
KCMF1	322.461
MAT2A	322.461
RPIA	322.461
ANKRD36BP2	322.461
AC092835.2	322.461
ANKRD36B	322.461
RPL24	322.461
PDCL3P4	322.461
RP11-281P11.1	322.461
ALCAM	322.461
RP11-861A13.4	322.461
RP11-231E6.1	322.461
BTLA	322.461
ZBTB20	322.461
IGSF11	322.461
GOLGB1	322.461
SLC15A2	322.461
ILDR1	322.461
ROPN1B	322.461
RPN1	322.461
ACAD9	322.461
CNBP	322.461
PIK3R4	322.461
RASA2	322.461
CHST2	322.461
SLC33A1	322.461
METTL15P1	322.461
RP11-550I24.2	322.461
BTD	322.461
GPR160	322.461
VPS8	322.461
RPL39L	322.461
RP11-141C7.4	322.461
RP11-480A16.1	322.461
NRROS	322.461
AC024560.2	322.461
LINC00692	322.461
STT3B	322.461
DYNC1LI1	322.461
TRAK1	322.461
LIMD1	322.461
HEMK1	322.461
RAD54L2	322.461
DNAH1	322.461
NISCH	322.461
SELK	322.461
APPL1	322.461
PDE12	322.461
CYP51P1	322.461
EPHA6	322.461
WDR1	322.461
SEC24D	322.461
RP11-33B1.1	322.461
PGRMC2	322.461
UVSSA	322.461
ELF2	322.461
RP11-669M16.1	322.461
AC006296.1	322.461
SLC10A7	322.461
RNA5SP169	322.461
RP11-555K12.2	322.461
TMEM154	322.461
CD38	322.461
RAPGEF2	322.461
SPCS3	322.461
AGA	322.461
LCORL	322.461
RN7SL28P	322.461
RP11-326I11.4	322.461
FAM149A	322.461
RHOH	322.461
UGT2B17	322.461
CCNI	322.461
CNOT6L	322.461
HERC5	322.461
ST8SIA4	322.461
FBXL17	322.461
FER	322.461
PJA2	322.461
RP11-159K7.1	322.461
CSNK1G3	322.461
ISOC1	322.461
TERT	322.461
IRF1	322.461
HSPA4	322.461
CLPTM1L	322.461
EGR1	322.461
UBE2D2	322.461
KIAA0141	322.461
ADRB2	322.461
RBM22	322.461
TNIP1	322.461
CTB-17P3.4	322.461
MIR1303	322.461
ADAM19	322.461
UBLCP1	322.461
ERGIC1	322.461
CDHR2	322.461
RP11-798K23.5	322.461
LINC00847	322.461
AC138031.1	322.461
CTD-2186M15.1	322.461
SUB1	322.461
LMBRD2	322.461
NIPBL	322.461
CTD-2201E18.1	322.461
CTD-2201E18.5	322.461
SNX18	322.461
KIAA0947	322.461
MAP3K1	322.461
GPBP1	322.461
ERBB2IP	322.461
CENPH	322.461
RP11-98J23.2	322.461
GTF2H2B	322.461
SERINC5	322.461
CTD-2007H13.3	322.461
FOXO3	322.461
ARMC2	322.461
SMIM13	322.461
RP3-420J14.1	322.461
MAN1A1	322.461
RP11-735G4.1	322.461
CENPW	322.461
SIRT5	322.461
BCLAF1	322.461
MCUR1	322.461
IFNGR1	322.461
RP11-471B18.1	322.461
AIG1	322.461
UTRN	322.461
ZBTB2	322.461
ZDHHC14	322.461
SRP72P2	322.461
SFT2D1	322.461
DUSP22	322.461
HIST1H3E	322.461
RP11-457M11.5	322.461
ZNF184	322.461
RSL24D1P1	322.461
HCG14	322.461
TRIM26	322.461
ABCF1	322.461
HLA-C	322.461
XXbac-BPG181B23.7	322.461
HSPA1B	322.461
XXbac-BPG154L12.4	322.461
BAK1	322.461
IRF4	322.461
BTBD9	322.461
TBCC	322.461
GLTSCR1L	322.461
RP1-152L7.5	322.461
BMP6	322.461
PHIP	322.461
SLC35B3	322.461
PM20D2	322.461
UBE2J1	322.461
GIGYF1	322.461
RP11-325F22.2	322.461
TMEM168	322.461
SND1	322.461
DGKI	322.461
ZC3HAV1L	322.461
RHEB	322.461
CYCS	322.461
MIR148A	322.461
TMED4	322.461
PPIA	322.461
FIGNL1	322.461
RP11-479O9.2	322.461
GTF2IRD1P1	322.461
PTPN12	322.461
HGF	322.461
BET1	322.461
AC079781.8	322.461
ZNF706	322.461
KLF10	322.461
AF131215.8	322.461
EXT1	322.461
TBC1D31	322.461
LONRF1	322.461
TRIB1	322.461
RP11-697B24.1	322.461
CHRAC1	322.461
AGO2	322.461
GSDMD	322.461
ZNF34	322.461
ZNF7	322.461
PCM1	322.461
AC144568.2	322.461
LEPROTL1	322.461
LYN	322.461
NCOA2	322.461
TRAM1	322.461
HEY1	322.461
MTDH	322.461
NANS	322.461
SEC61B	322.461
TEX10	322.461
SLC44A1	322.461
RAD23B	322.461
HSDL2	322.461
DFNB31	322.461
RP11-542K23.9	322.461
CRB2	322.461
ZNF79	322.461
SH2D3C	322.461
CDK9	322.461
URM1	322.461
ABL1	322.461
FAM78A	322.461
GTF3C5	322.461
C9orf69	322.461
C9orf163	322.461
C9orf169	322.461
RP11-477G9.1	322.461
CAAP1	322.461
NFX1	322.461
UNC13B	322.461
TESK1	322.461
CLTA	322.461
RP11-104G3.2	322.461
RP11-204M4.2	322.461
RP11-175I6.5	322.461
RP11-111F5.2	322.461
PLGRKT	322.461
KIAA1432	322.461
RP11-390F4.2	322.461
RP11-391M20.1	322.461
RP11-87H9.2	322.461
AC125634.1	322.461
AL591479.1	322.461
CBWD3	322.461
KLF9	322.461
KANK1	322.461
ANXA1	322.461
CEP78	322.461
RP11-213G2.3	322.461
CKS2	322.461
SYK	322.461
RP11-367F23.2	322.461
RP11-440G5.2	322.461
ZNF510	322.461
ZNF250	321.163
PDHB	319.895
HCN1	319.895
RALA	319.895
CHD4	318.632
RNF44	318.632
SYVN1	317.371
CRTC3	317.371
RFK	317.371
SCARNA20	316.114
ELOVL1	316.114
RP11-393B14.2	316.114
RP11-141M1.3	314.859
SNORD28	314.859
STX11	313.607
ZSCAN21	313.607
USP46	312.358
IQGAP2	312.358
LCA5	312.358
AP1G1	311.112
ZNF639	311.112
AL117380.2	309.868
FAM208A	309.868
UBE3A	308.627
AP001631.9	308.627
RP11-573D15.1	308.627
GOLGA8S	307.388
H2AFJ	304.92
KHDC1	304.92
EIF5	303.69
CAPRIN1	302.462
MSL1	302.462
PPIG	302.462
RP11-524L6.4	302.462
FBXW4	301.237
WI2-1896O14.1	301.237
PRDM5	301.237
RP11-65J3.3	301.237
RGCC	300.015
RN7SKP127	300.015
CTA-211A9.5	300.015
NFU1	300.015
RNU6-544P	298.795
RAB10	298.795
COPG1	298.795
AP4E1	297.578
RP11-555K12.1	296.364
FOXP2	295.152
TRGV1	295.152
RANBP9	293.943
RP11-367F23.1	292.737
IER5	291.533
PTBP3	291.533
METTL14	290.332
TMA16	290.332
EZR-AS1	290.332
MIR193A	289.133
RP11-134P9.3	289.133
RNU6-487P	287.937
CCT6P1	287.937
ZNF274	286.744
AF165138.7	285.553
AP000350.5	285.553
MINA	285.553
RWDD1	285.553
FUBP3	285.553
UEVLD	284.365
ATP2A2	284.365
VN1R96P	283.179
ZNRF2	283.179
RP11-505K1.1	281.996
SMU1	281.996
RP3-413H6.2	280.816
CREG1	279.638
IWS1	279.638
ROCK1	278.463
BBC3	278.463
TRMT61B	278.463
2020-09-11	278.463
SETP9	277.29
Z95704.4	277.29
SET	276.12
PIK3R1	274.952
FAM27A	274.952
ETV6	273.787
TPP2	273.787
PCMTD2	273.787
RNU2-63P	272.624
BRAF	272.624
KLHDC8B	271.464
OTUD4	271.464
RP5-921G16.1	271.464
PMEPA1	270.307
ERVH48-1	270.307
EIF3A	269.151
ZNF234	269.151
NUDT4P1	269.151
YTHDF1	269.151
AGBL3	267.999
CISD1	266.849
CCSAP	266.849
HPCAL1	266.849
CD47	266.849
AMZ2P1	265.701
RP11-373J16.2	264.557
RP5-855F14.1	264.557
MAPK13	264.557
PPP1R14D	263.414
SLC25A24	262.274
RP11-359E8.5	262.274
AC098828.3	262.274
RP11-389C8.1	262.274
FBP1	262.274
IL15	261.137
LAMA5	260.001
LL22NC03-2H8.5	260.001
ABC7-43041300I9.1	260.001
DMRT2	260.001
RNU6-1329P	258.869
TBC1D27	258.869
RP11-216M21.1	258.869
RP3-395M20.12	257.739
RHOB	256.611
MTIF3	255.486
FAM208B	254.363
LASP1	254.363
YTHDF2	254.363
COX20	253.243
ZDHHC2	253.243
RP3-455J7.4	252.126
RN7SKP211	252.126
RP11-629O1.2	252.126
UCK1	252.126
APMAP	249.897
AC083949.1	249.897
CCDC41	248.787
ARL17B	248.787
RP11-173M1.5	247.679
KDELR1	247.679
MTO1	247.679
UAP1L1	247.679
RP11-574F11.3	247.679
FOXJ2	246.573
RNF187	246.573
SLC17A9	246.573
GUCY1A2	245.47
SLC38A10	245.47
AC073046.25	245.47
RP11-109M17.1	245.47
RGS2	244.37
RNU6-475P	244.37
FAM86B2	244.37
ZNF623	244.37
COLCA2	243.271
ZC3H18	243.271
AC108211.1	243.271
KLHDC2	242.176
CTB-25J19.9	242.176
LINC01036	242.176
LINC00493	242.176
PIM1	242.176
DMRTA1	242.176
RP5-1029F21.3	241.082
SULF2	241.082
AC097499.1	241.082
LINC01023	241.082
RP11-381K20.4	241.082
KIAA1737	239.991
RP4-610C12.3	238.903
PWWP2A	238.903
CMSS1	237.817
NDUFA12	236.733
LARP1B	235.651
PHF15	235.651
GTF2IRD2B	235.651
CORO1B	234.572
SFR1	233.496
RP11-881M11.8	233.496
CTB-129O4.1	232.422
HLA-Z	232.422
CSK	231.35
DUSP10	231.35
ABLIM2	231.35
C6orf99	231.35
AC083843.2	230.281
RP11-135A1.2	229.214
PRDM1	229.214
TNS3	229.214
TOLLIP-AS1	228.149
PLEKHA2	228.149
TRIM59	227.087
SBNO2	226.027
NOP56	226.027
RP11-478K7.2	224.969
XXbac-BPG249D20.9	223.914
CCM2	223.914
UBC	222.861
CCDC15	221.811
ASXL1	221.811
FAM177B	220.763
PLXNC1	218.674
RP11-1070N10.3	218.674
CD300A	218.674
MTR	216.594
SDHAP1	216.594
FANCA	215.558
CD274	215.558
PTGES3	214.524
RP11-236F9.2	214.524
TSHZ1	212.463
VAPB	212.463
LY75	212.463
RP3-380B8.4	212.463
2020-03-03	211.436
CTC-471C19.1	211.436
HNRNPF	209.39
POLR3B	209.39
FOXN2	209.39
AC027124.3	209.39
RP11-598G2.1	208.37
RUFY1	208.37
RNU1-35P	208.37
KCNA5	207.352
PDIK1L	207.352
IGLC7	207.352
APOBEC3B	207.352
FBXL3	206.337
UQCRH	206.337
SMC2	206.337
SLAMF7	205.324
RP11-347E10.1	204.313
SFT2D2	203.305
CAP1	203.305
CATX-2	203.305
VPS37B	202.299
SEC14L1	202.299
TMEM214	202.299
TPRKB	201.295
RP11-258O13.1	200.294
VAMP4	200.294
NSMCE2	200.294
GZF1	199.295
PRDM15	199.295
C2orf76	199.295
IKZF1	198.298
ITM2B	197.304
VAPA	197.304
PLAGL1	197.304
UBALD2	196.312
AP001056.1	196.312
ZNF789	196.312
CYB561	195.322
EEA1	194.334
NMB	194.334
ZNF93	194.334
TRIM42	194.334
BMS1P10	194.334
KCNJ1	193.349
CTD-2555A7.1	193.349
B4GALNT4	191.386
PMM1	190.407
RP11-456H18.2	190.407
LINC00649	189.431
ITSN2	189.431
RP11-279O9.4	189.431
ADC	188.458
RNU1-51P	188.458
LINC00467	187.486
AP003774.1	186.517
GLIS2	186.517
IL17REL	186.517
RP11-192P3.4	185.55
TRPM7	185.55
PIM3	185.55
RP11-473M20.16	184.586
AF127936.3	184.586
DIP2A	184.586
KBTBD8	184.586
ATP10D	184.586
POLR2J2	184.586
RP11-460C6.1	184.586
RP11-113K21.2	183.623
RP3-483K16.4	183.623
UPP1	183.623
PHF2	183.623
SOCS7	182.663
TBC1D1	182.663
C5orf56	182.663
CBLN1	180.75
TRAPPC10	180.75
PIP5K1B	180.75
MINPP1	179.797
ITPR2	179.797
SLC25A44	178.846
RP11-536N17.1	178.846
MLLT3	178.846
RP11-417N10.3	177.898
ZNF487	176.952
CHIT1	176.952
ANKRD36C	176.952
HSD17B4	176.952
AAED1	176.952
CTD-2507G9.1	176.007
CD46	176.007
CTBS	176.007
RNU6-1001P	176.007
UQCRC2P1	176.007
GGH	176.007
IFNG-AS1	175.066
KLHL32	175.066
RICTOR	174.126
TRERF1	174.126
STMN2	174.126
RPS27L	173.189
PDCD2	173.189
RARRES2P2	171.322
IL10RA	171.322
RPL39P38	169.463
MOGS	169.463
SBDSP1	169.463
POLR3GL	168.537
PDE4B	168.537
MICD	168.537
ALDH3B1	167.614
SNX18P13	167.614
XIRP1	167.614
ENTPD3-AS1	167.614
RP11-53O19.3	167.614
RP1-265C24.5	167.614
RN7SKP143	166.692
SLC27A4	166.692
HGSNAT	165.773
GAN	164.857
RP4-535B20.1	164.857
RBMXL1	164.857
RP11-91K8.2	164.857
NR3C1	164.857
SRF	164.857
MED13L	163.03
RP11-589F5.4	163.03
SNRPD2P1	162.12
RNU6-675P	162.12
MIR4435-1	162.12
EREG	162.12
RP11-136O12.2	162.12
FAM8A1	161.212
MDFIC	161.212
FAM27C	161.212
KCNC4	160.307
MIR138-1	160.307
STARD10	159.403
DNAJB5	159.403
OCEL1	158.502
PREP	157.604
AP001055.1	156.707
DGCR6	156.707
PPARA	156.707
RP6-42F4.1	155.813
PDXDC2P	154.921
C17orf59	154.921
OMA1	154.921
AC004832.1	154.921
SLIT2	154.921
MICB	154.921
ZNF367	154.921
DNAJB12	154.032
NSMCE4A	153.144
RP11-573G6.6	153.144
MYEOV	153.144
CALU	153.144
CAND1	152.259
CLECL1	152.259
BICD2	152.259
BMS1	151.376
METTL3	151.376
USP8	151.376
BPGM	151.376
AGGF1P2	150.496
AC007106.1	150.496
AC024560.3	149.617
FAM115C	149.617
LINC00707	148.741
DRAM1	148.741
ELK2BP	148.741
PTP4A2P1	148.741
HES1	148.741
GPX6	148.741
RP11-315O8.1	147.868
CTD-2227E11.1	147.868
GRHPR	146.996
GAPDHP27	146.127
AP001046.6	146.127
RP1-151B14.9	146.127
GORASP2	146.127
FAF2	146.127
STOM	146.127
TRPV3	145.26
KB-1460A1.1	145.26
AC012150.1	144.395
IGHV1OR15-6	144.395
ZNF697	144.395
NSFL1C	144.395
HSPA13	144.395
AC093159.1	144.395
PLEKHM2	143.532
DGKD	143.532
U2SURP	143.532
GGNBP2	142.672
CLIC4	142.672
BTG3	142.672
MYL3	142.672
ANKRD20A1	142.672
KLHL24	141.814
RNU6-224P	141.814
TMEM248	141.814
VAV2	141.814
KCNA2	140.958
RP11-396C23.3	140.958
IFT57	140.958
MXD4	140.958
PDSS2	140.958
UPF3A	140.105
GCFC2	140.105
RN7SL571P	139.254
CEACAMP3	139.254
KCTD3	138.405
AJAP1	138.405
MYD88	138.405
INTS10	138.405
KCNJ6	137.558
HECTD1	136.713
RP11-325I22.2	136.713
MAP7D1	135.871
RP11-187C18.3	135.871
MAF	135.031
AC015884.1	135.031
GTF2IP1	135.031
SEL1L	134.193
PKM	134.193
RP11-98G7.1	134.193
AL590560.1	134.193
ARSA	134.193
AC074289.1	134.193
PERP	134.193
U8	133.358
ZFP36L1	133.358
CSNK1D	133.358
LDLRAD4	133.358
RBM39	133.358
KDM3A	133.358
RP11-665E10.3	132.525
HERC2	132.525
TARDBP	132.525
KCNS3	132.525
AC126182.1	132.525
AGGF1P1	132.525
HECA	132.525
UBAP1	132.525
NSFP1	131.694
IGLV8-61	131.694
BCR	131.694
CHPF2	131.694
RXFP4	130.865
GPCPD1	130.865
RP11-138I18.2	130.039
RP11-725G5.2	130.039
RP11-424I19.2	130.039
PARP14	130.039
ANKRD28	130.039
RFC3	129.215
IFNAR1	129.215
ABRACL	129.215
RP3-460G2.2	129.215
ZCCHC24	128.393
SFN	127.573
SLC35D1	127.573
AP001058.3	127.573
HMGB2	127.573
C21orf91	126.756
FNIP1	126.756
SLC16A13	125.941
RCC2	125.941
RBM47	125.941
PSAT1	125.941
BUB1	125.128
COX5B	125.128
ZFYVE16	125.128
MYC	125.128
ARID5B	124.318
ZNF532	124.318
FGGY	124.318
RP13-685P2.7	124.318
ANKRD13A	123.509
UNC119B	123.509
RAP1B	123.509
NFKB2	122.703
ARHGAP32	122.703
CNTN5	122.703
PLXNA2	122.703
AC069213.1	122.703
FOXO1	121.899
COG3	121.899
MPI	121.899
SFPQ	121.899
SSX2IP	121.899
SLC29A3	121.098
LINC00276	121.098
SLC25A38	121.098
RP11-149P24.1	121.098
AC092625.1	120.299
FZD3	119.502
RN7SKP294	119.502
PAPD7	118.707
RP11-702B10.1	117.915
RNU1-80P	117.125
TXLNB	117.125
RP11-529J17.3	116.337
SRSF1	116.337
PPP1R10P1	115.551
AMBRA1	115.551
THRAP3	115.551
RP11-661A12.5	115.551
PLA2G15	114.768
EIF4A3	114.768
MYO6	114.768
RP11-496N12.6	113.987
C5orf42	113.987
HTR1B	113.987
TNFRSF13C	111.658
MARCKS	111.658
PIK3CG	111.658
ZNF804A	110.886
ZDBF2	110.886
AC011416.1	110.886
GTPBP1	110.116
AP000345.4	109.349
AC093627.7	109.349
RP11-77I22.4	108.584
ACSS1	108.584
NELFCD	108.584
TBL1XR1	108.584
MYL8P	108.584
PDE5A	107.821
FAM203B	107.821
RP11-711C17.1	107.06
LRRC8B	107.06
D86998.1	107.06
ANP32B	107.06
EDF1	107.06
ITGAV	106.302
TMTC4	105.546
RP11-259G18.1	105.546
UBP1	105.546
CEP135	105.546
RP11-402G3.4	105.546
INO80	104.793
RP11-1415C14.3	104.793
TBC1D2	104.793
RN7SL794P	104.793
RAB31	104.041
NCOA1	103.292
UGP2	103.292
ANKS1A	103.292
VWDE	102.546
RP11-229C3.2	101.801
ZNF76	101.801
PAX5	101.801
SLK	101.059
TSHZ2	101.059
MSL2	101.059
CTD-2049O17.1	101.059
RP11-497H16.5	101.059
AC006007.1	101.059
TMEM120B	100.319
RP11-333O1.1	100.319
CUX1	100.319
GRASP	99.582
MAU2	99.582
AC008069.1	99.582
POLR1A	99.582
DENND3	99.582
RP11-424I19.1	98.8468
MYO5A	98.8468
CSNK1G2	98.8468
RAF1	98.8468
CTD-2197M16.1	98.8468
LUC7L3	98.1139
ADSL	98.1139
RP11-336F14.1	97.3834
EYA2	97.3834
WHSC1	97.3834
STK10	97.3834
RNA5SP382	96.6551
MANBAL	96.6551
ATP5F1P4	96.6551
AC104024.1	95.9292
RPS2P1	95.9292
DANCR	95.9292
TRAPPC9	95.9292
RP11-443B9.1	95.9292
SELPLG	95.2055
AL901608.1	95.2055
RPS14P7	95.2055
MOXD1	95.2055
GNL1	95.2055
POLR3H	94.4842
ATG10	94.4842
TG	94.4842
ITPRIP	93.7652
CTB-147N14.4	93.7652
SHQ1	93.7652
MAP3K5	93.7652
LTA	93.0486
LYRM4	93.0486
ZBTB26	93.0486
HMGB3P26	92.3342
RP11-367J7.4	92.3342
CBX7	92.3342
HBP1	92.3342
SPAG6	91.6222
SLC38A1	91.6222
CD55	91.6222
ABCG1	91.6222
INPP4A	91.6222
C5orf47	91.6222
RCL1	91.6222
RP5-905G11.3	90.9125
RP11-303G3.6	90.9125
RP11-501E14.1	89.5001
POLR2J4	89.5001
MIR5700	88.7974
RNF157	88.7974
ELL2P1	88.7974
CROCC	88.7974
RNF38	88.7974
MACROD1	88.0971
RP11-138J23.1	88.0971
C11orf24	87.3991
RP11-45P15.4	87.3991
PPDPF	87.3991
HERC2P9	86.7034
GSPT1	86.7034
MRPL55	86.7034
AL672294.1	86.7034
CHD7	86.7034
RP11-215D10.1	86.0101
PPM1D	86.0101
LYPD8	86.0101
SRRM1P2	86.0101
MYF6	85.3191
UAP1	85.3191
MTFR2	85.3191
PEX6	85.3191
MTMR9	85.3191
ARHGAP21	84.6304
PPP1CB	84.6304
CDV3	84.6304
ATG5	84.6304
CHORDC1	83.9442
TSC22D2	83.9442
CAMK2D	83.9442
TCP11L1	83.2602
MTHFD1	83.2602
TMEM171	83.2602
AL513478.1	83.2602
RP11-419L9.1	82.5787
LINC00487	82.5787
BTN3A1	82.5787
MTCH1	82.5787
RAC1	82.5787
RP6-74O6.6	81.8994
MGAT4A	81.8994
PALD1	81.2226
GABRG2	81.2226
RP11-107N7.1	81.2226
OBP2A	81.2226
FAM188A	80.5481
SLC15A4	80.5481
BRD4	80.5481
KIAA0020	80.5481
RRN3P1	79.876
AC007386.3	79.876
RP11-111K18.2	79.876
AKAP11	79.2062
OR2B11	79.2062
SLC35F5	79.2062
HIST1H1E	79.2062
BLMH	78.5389
RP11-397D12.4	78.5389
IPPK	78.5389
RPSA	77.8739
RP11-346D6.4	77.2113
DUSP16	77.2113
MIR4426	77.2113
CTD-2023M8.1	77.2113
RP11-472G21.2	76.551
RP11-81H14.4	76.551
RPL36AP45	76.551
STK35	76.551
GUSBP9	76.551
ATP2A3	75.8932
AC093166.2	75.8932
NADK2	75.8932
RNF146	75.8932
USP48	75.2377
LETM1	75.2377
RP11-620J15.3	74.5846
CNDP1	74.5846
RP4-555D20.4	74.5846
TBC1D7	74.5846
HMGA1	74.5846
TRAM2-AS1	74.5846
MARK2	73.9339
RNU6ATAC28P	73.9339
HECTD2	73.2857
OR8R1P	73.2857
NAF1	73.2857
RP11-144G6.12	72.6398
GFI1	72.6398
FANCG	72.6398
ISG20	71.9963
UBE4B	71.9963
N6AMT1	71.9963
CISH	71.9963
SPATA5	71.9963
RP11-12K22.1	71.9963
RP11-311H10.7	71.9963
ZCCHC7	71.9963
IRF5	71.3552
DIAPH3	70.7166
CDT1	70.7166
FAM209B	70.7166
AC130888.1	70.0803
LRBA	70.0803
NANOS3	69.4465
RP11-467C18.1	69.4465
SIMC1	69.4465
CTD-2218K11.3	69.4465
SAMD9	69.4465
KLHL9	69.4465
RP5-901A4.5	68.8151
NPRL3	68.8151
RP6-206I17.1	68.8151
NUP54	68.8151
RP11-389O22.5	68.1861
PDCD1	68.1861
AC096579.7	68.1861
CCDC174	68.1861
RP11-648C16.1	68.1861
NSF	67.5595
ERN1	67.5595
BIK	67.5595
STAM2	67.5595
RN7SKP225	67.5595
KIF20B	66.9354
TICAM1	66.9354
ZNF877P	66.9354
NCAPG2	66.9354
B3GALTL	66.3137
NSUN4	65.6944
C2orf42	65.6944
RP1-15D7.1	65.6944
RP11-101C11.1	65.0776
ID1	65.0776
NUDT9	65.0776
GNPDA1	65.0776
RNF122	65.0776
RP11-589C21.6	65.0776
ZFAND5	65.0776
TMEM126A	64.4633
RP11-335M9.1	64.4633
AC069368.3	64.4633
RP11-12A2.1	64.4633
TAF5	63.8514
SAR1A	63.8514
ABCD2	63.8514
S100A11	63.8514
MLTK	63.8514
ANKRD36	63.8514
AC109826.1	63.8514
SMAD1	63.8514
RNA5SP158	63.8514
UBE2K	63.8514
CTD-2555I5.1	63.2419
TMTC2	63.2419
BTN2A3P	63.2419
CMTR1	63.2419
ANKRD20A2	63.2419
KIAA0907	62.6349
MEF2D	62.6349
NCOA3	62.6349
MRGBP	62.6349
RP3-352A20.1	62.6349
NAV2	62.0303
CFL1	62.0303
MAP2K3	62.0303
CALM2	62.0303
ARRDC3	62.0303
CCT6P3	62.0303
CTD-2028E8.1	61.4283
DNAL1	61.4283
RAB11FIP3	61.4283
NFATC1	61.4283
KRAS	60.8286
GS1-57L11.1	60.8286
RN7SKP114	60.8286
ZNF778	60.2315
SLC41A1	60.2315
RP11-305L7.6	60.2315
PCDH9	59.6369
BPTF	59.6369
WNT10A	59.6369
RP11-395G23.3	59.6369
FAM214A	59.0447
ZNF710	59.0447
IGLV4-3	59.0447
RNU6-961P	59.0447
ST6GAL1	59.0447
UBXN7-AS1	59.0447
LINC00941	58.455
CTD-2287N17.1	58.455
CTC-295J13.3	57.8678
RN7SL721P	57.2831
GYPC	57.2831
ACTR2	57.2831
NEUROG1	57.2831
MRPL19	56.7009
PLXNA1	56.7009
PRKAA1	56.7009
RNU6ATAC	56.7009
SEPHS1	56.1212
MAPK3	56.1212
AKT2	56.1212
ZNF324	56.1212
AL031663.2	56.1212
SFXN1	56.1212
FDX1	55.544
RALGAPA1	55.544
LA16c-325D7.2	55.544
AC068282.3	55.544
AC092660.1	55.544
MB21D2	55.544
SNX13	55.544
FNBP1	55.544
MDM2	54.9693
CD74	54.9693
USP42	54.9693
DPCD	54.3971
AC092635.1	54.3971
FAT4	54.3971
PHLDA2	53.8275
ZNF317	53.8275
RNU6-556P	53.8275
LMTK2	53.8275
HABP4	53.8275
ATP2B4	53.2604
IL1RN	53.2604
WRNIP1	53.2604
FKBPL	53.2604
ABCA5	52.6958
RP11-1055B8.6	52.6958
RNA5SP99	52.6958
RP11-279F6.1	52.1338
RP11-567B20.2	52.1338
RN7SL255P	52.1338
GABRR1	52.1338
IFNGR2	51.5743
AC008780.1	51.5743
ELFN1	51.5743
RP11-89M20.2	51.5743
JAK2	51.5743
AGTPBP1	51.5743
TFAM	51.0173
SLITRK5	51.0173
AC093577.1	51.0173
XXbac-BPG248L24.10	51.0173
SCARNA16	50.4629
TXNIP	50.4629
RP11-424M21.1	50.4629
GBA3	50.4629
RP11-85E16.1	50.4629
ANKRD20A4	50.4629
RPL23	49.911
ADSS	49.911
HIST1H4K	49.911
POU5F1	49.911
RPL8	49.911
RNASET2	49.3618
HMGN4	49.3618
HLA-DOB	49.3618
XRCC6BP1	48.815
VPS54	48.815
UGT8	48.815
TMEM128	48.815
EDIL3	48.815
LMO1	48.2709
UCK2	48.2709
LINC00886	48.2709
RP11-646E18.3	48.2709
HNRNPA0	48.2709
ARL15	48.2709
RP11-30G8.2	47.7293
MIR1202	47.7293
CCDC167	47.7293
BACH2	47.7293
CTD-3035D6.2	47.1903
AC007950.1	47.1903
CMTR2	47.1903
SF3B1	47.1903
RANBP6	47.1903
LSAMP	46.6539
BFSP2	46.6539
DNAJC5B	46.6539
RPL7P41	46.1201
RP5-887A10.1	46.1201
AC012368.1	46.1201
VEGFC	46.1201
KIFC1	46.1201
RP3-470L22.1	46.1201
NFE2L3	46.1201
KB-1683C8.1	46.1201
RP11-138I18.1	45.5889
RABGGTA	45.5889
PLLP	45.5889
CD86	45.5889
RP11-52B19.8	45.5889
KIAA2018	45.0603
RP5-899B16.2	45.0603
ZNF467	45.0603
METTL10	44.5343
MAP4	44.5343
GRPEL1	44.5343
HIST1H4H	44.5343
IGKV1OR-2	44.5343
RP11-314D7.2	44.0109
RBBP5	44.0109
FAM76A	44.0109
MTHFD2	44.0109
HINT3	44.0109
RP1-140C12.2	44.0109
LRRC16A	43.4902
RNY5	43.4902
AC004895.4	43.4902
SCT	42.972
RP11-282M16.1	42.972
RP11-361F19.1	42.972
RP11-394D2.1	42.972
ARL5A	42.2318
ZNF316	42.2318
C9orf91	42.2318
RP11-2B6.3	42.2318
ZNF782	42.2318
CRY2	41.8616
NID2	41.8616
RP11-65J21.3	41.8616
ZZZ3	41.8616
CTD-2227C6.2	41.8616
ZNF33B	41.4064
DDX50	41.4064
RP11-23E10.3	41.4064
RP11-17M15.2	40.9173
RNA5SP443	40.9173
SLC9A8	40.9173
PPP3CC	40.9173
NR4A3	40.9173
RP11-503G7.1	40.2008
SRPK1	40.2008
ZBTB5	40.2008
RGS13	39.8368
MIR155HG	39.8368
ZFR	39.8368
AL772307.1	39.8368
NCAPH	39.3916
TNFAIP8	39.3916
HERC2P3	38.9133
ENAH	38.9133
LINC00528	38.9133
PCDHB2	38.9133
KB-1980E6.3	38.9133
RP5-1051D14.1	38.2964
UPF2	37.8896
RP11-119D9.1	37.8896
KLHDC4	37.8896
RSL24D1P11	37.8896
SKI	37.8896
RBMS1	37.8896
ZNF518B	37.8896
OLIG3	37.8896
MB21D1	37.8896
BLNK	37.432
POLD4	37.432
RGS12	37.432
LATS1	37.432
GRK5	36.8077
CDC42	36.8077
RNU6-192P	36.8077
DLEC1	36.8077
ZSWIM6	36.8077
ANKRD10	36.4214
SAMD4A	36.4214
BCL3	36.4214
TDRD7	36.4214
RP11-346D6.6	35.978
PAWRP1	35.978
NUBP1	35.978
IL9RP3	35.978
RABAC1	35.978
RRP1B	35.978
ANKRD50	35.978
MORN3	35.372
AC012322.1	35.372
RP4-550H1.4	35.372
RNU6-939P	35.372
LEMD2	35.372
LMBRD1	35.372
RP11-1017G21.5	34.9892
NDUFAF1	34.9892
CYP2R1	34.5525
PAFAH1B1	34.5525
RP11-820I16.2	34.5525
PMAIP1	34.5525
CMPK1	34.5525
RNU7-144P	34.5525
APOL3	34.5525
TET2	34.5525
SYNCRIP	34.5525
SP8	34.5525
GTF2I	34.5525
PABPC1	34.5525
RP11-1041F24.1	33.9797
RSL24D1	33.9797
MAP4K3	33.9797
FAM168A	33.5894
ETV3	33.5894
SUCO	33.5894
RP11-560A15.3	33.5894
EFNA5	33.5894
NAA38	33.5894
AP003356.1	33.5894
RP11-738G5.2	33.5894
RP4-536B24.3	32.9486
AP000251.3	32.9486
RP11-315A17.1	32.9486
LANCL2	32.9486
ATP5B	32.6192
VPS45	32.6192
RN7SKP276	32.6192
RPL27AP	32.6192
RP11-395I6.2	32.6192
SMURF1	32.6192
RP11-67H2.1	32.6192
ZC2HC1A	32.6192
RP11-693J15.5	32.2172
KLF12	32.2172
SNORD3B-2	32.2172
RNA5SP471	32.2172
RP11-309G3.3	32.2172
IFNLR1	32.2172
CDKN1A	32.2172
RPL7L1	32.2172
RP11-640I2.1	31.6421
CD79B	31.6421
TIAM1	31.6421
AC007381.3	31.6421
UTP15	31.6421
NOTCH2NL	31.2816
GLUL	31.2816
CUL3	31.2816
RP11-18H21.1	31.2816
MLF1IP	31.2816
LINC00222	31.2816
KIAA1244	31.2816
SNX9	31.2816
TXN	31.2816
LINC01063	30.6635
RP11-352E6.1	30.6635
AC112198.1	30.6635
AKAP13	30.3483
RN7SL599P	30.3483
DNAH7	29.9623
CD28	29.9623
C4orf26	29.9623
ESRP1	29.9623
AL161452.1	29.9623
C10orf85	29.4199
LINC00462	29.4199
CDKN2AIP	29.4199
FCRL2	29.0631
TRAPPC3	29.0631
RP1-37J18.2	29.0631
TMEM131	29.0631
RNU6-788P	29.0631
RP11-347D21.3	28.5006
ANXA5	28.5006
RASL11B	28.5006
TP53TG1	28.5006
LINC00263	28.1726
RCBTB1	28.1726
GCH1	28.1726
LGMN	28.1726
YBX1P5	28.1726
DOLPP1	28.1726
CAMK1D	27.5945
SC5D	27.5945
MARK3	27.5945
PTGER2	27.5945
CTD-3113P16.9	27.5945
PPP1R2P3	27.5945
C7orf61	27.5945
FCHSD2	27.293
NFKBIA	27.293
RP11-424D14.1	27.293
ANKRD33B	27.293
HCG11	27.293
RAPGEF1	27.293
RP11-525A16.4	26.9263
ATP9B	26.9263
HSP90AB1	26.9263
EPS15L1	26.426
CCDC7	26.076
RP11-20J1.1	26.076
PSMC1	26.076
SUZ12	26.076
AC007880.1	26.076
ARHGEF12	25.5735
SNORA25	25.5735
RP11-81H14.3	25.5735
SMG9	25.5735
GDAP2	25.5735
PPID	25.5735
MED10	25.5735
SMEK1	25.2381
CITF22-92A6.1	25.2381
EXOC4	25.2381
POM121C	25.2381
DCTN2	24.7367
FZD2	24.7367
bP-21201H5.1	24.7367
RPS2P25	24.7367
RASA1	24.7367
UBE2W	24.7367
CYB5R3	24.4134
CCDC88A	24.4134
RP11-20B7.1	24.4134
SPATA4	24.4134
CITED2	24.4134
RCOR1	23.9163
ZNF554	23.9163
TAB1	23.9163
RN7SL499P	23.9163
MBNL1	23.9163
PTCHD3P1	23.6024
RP5-1119D9.4	23.6024
RP11-290F5.2	23.6024
RNU6-1060P	23.6024
RP11-128L5.1	23.6024
CTD-3037G24.3	23.1125
RPRD2	23.1125
CCDC71	23.1125
KCNQ5	23.1125
MIR210HG	22.8056
CTD-3092A11.1	22.8056
ZFAND6	22.8056
RNU7-134P	22.8056
RP11-284A20.1	22.8056
BOD1	22.8056
SERPINB6	22.8056
EFHC1	22.8056
SLC25A13	22.8056
RBM20	22.3251
TSC22D1	22.3251
SLC16A3	22.3251
MST1P2	22.3251
AL079339.1	22.3251
ALS2CL	22.3251
SERPINB9	22.3251
NOLC1	22.0228
CCND1	22.0228
BTBD3	22.0228
TLR6	22.0228
RP11-521I2.3	22.0228
RP11-162D16.2	22.0228
CAB39	21.5537
NDUFS4	21.5537
RP11-89K11.1	21.254
NEIL2	21.254
RP11-436G20.1	21.254
FLYWCH1	20.7977
GNGT2	20.7977
PIGT	20.7977
MIR3144	20.7977
GALNT12	20.7977
RP11-482E14.1	20.499
E2F7	20.499
AURKAIP1	20.499
ACAD11	20.499
INPP4B	20.499
CTB-43E15.2	20.499
MICU3	20.499
RP11-16F15.1	20.0562
FLJ27365	20.0562
SEPHS2P1	20.0562
AC005537.2	20.0562
RP11-398K14.1	20.0562
SUN1	20.0562
AC104024.2	19.7574
GATAD2A	19.7574
AGPAT3	19.7574
AC098826.5	19.7574
TRAPPC12	19.7574
PTPRG	19.7574
PTP4A1P4	19.7574
RPL17P33	19.7574
RP11-390F4.3	19.7574
GTF2F2	19.3286
PPP1R15A	19.3286
RP4-781K5.8	19.3286
ATG4C	19.3286
CCDC104	19.3286
PTGER4	19.3286
TOB2P1	19.3286
DPY19L4	19.3286
TFCP2	18.8655
P2RX5	18.8655
RP5-1098D14.1	18.8655
SERBP1	18.8655
ADM2	18.8655
NUP210	18.8655
RSPH4A	18.8655
RP11-164N20.2	18.8655
POP7	18.8655
ZNF92	18.8655
PPP2R2A	18.8655
RP11-679C8.2	18.6141
RP3-354N19.1	18.6141
FZD1	18.6141
PHF19	18.6141
UBE3C	18.1706
ANO5	17.9122
RP11-91I8.1	17.9122
TMEM183A	17.9122
RP11-22A3.2	17.9122
SYTL3	17.9122
DCAF5	17.4876
SEPW1	17.4876
ATRN	17.4876
TTC30B	17.4876
RP11-40M23.1	17.4876
PRKCI	17.4876
SPIN1	17.4876
SPPL3	17.2223
HSPH1	17.2223
TLN2	17.2223
ADAR	17.2223
CD1D	17.2223
TTC38	17.2223
CDKN2AIPNL	17.2223
CTC-338M12.9	17.2223
ZNF783	17.2223
LRRC27	16.8156
RNU2-2P	16.8156
UBE2G1	16.8156
MKL1	16.8156
CDC27P1	16.8156
AC007365.1	16.8156
MYH15	16.8156
AC138783.11	16.8156
THAP1	16.8156
C10orf99	16.3851
CHURC1	16.3851
RAB13	16.3851
C1orf27	16.3851
C1orf53	16.3851
PAIP2B	16.3851
KCNH2	16.3851
DRG1	16.1542
RPL12P2	16.1542
CNTRL	16.1542
GPR107	16.1542
DNAJC8	15.7449
GOLIM4	15.7449
RP11-61G19.1	15.7449
PON3	15.7449
METTL7A	15.5031
AL118525.1	15.5031
NUP155	15.5031
RP1-261G23.5	15.5031
AC020743.4	15.5031
EMC2	15.5031
BCL2L14	15.1134
P2RX7	15.1134
B3GALNT2	15.1134
FAM3C	15.1134
AL356215.1	14.706
RP11-347C12.3	14.706
CTC-525D6.1	14.706
RALGAPB	14.706
RAC2	14.706
ATP6V1G1	14.706
NRD1	14.4903
POLE4	14.4903
THRAP3P1	14.4903
PRRC1	14.4903
EDN1	14.4903
AC083760.1	14.1043
RNA5SP474	14.1043
AC007036.6	14.1043
RP11-408N14.1	14.1043
RP11-338O1.3	13.8758
SERTAD1	13.8758
ARFGEF2	13.8758
OTOL1	13.8758
C9orf72	13.8758
RP11-320N7.1	13.5093
POLR3E	13.5093
EIF4H	13.5093
ECHS1	13.1307
ISLR2	13.1307
RP11-7G12.2	13.1307
ASXL2	13.1307
ZNF786	13.1307
TOMM7	13.1307
PVT1	13.1307
ADRBK1	12.9211
CMIP	12.9211
RP11-353N14.3	12.9211
ASNA1	12.9211
LSM14A	12.9211
IFFO2	12.9211
HELZ2	12.9211
FAHD2A	12.9211
SSR3	12.9211
CCNH	12.9211
UBR5	12.9211
SMARCA2	12.9211
RASA3	12.5627
TGDS	12.5627
ARID3B	12.5627
RP11-316M20.1	12.5627
HNRNPM	12.5627
MERTK	12.5627
DEF6	12.5627
AC006926.1	12.5627
FAM111B	12.1946
SEMA4A	12.1946
FAHD2B	12.1946
TAF1B	12.1946
RP11-618I10.2	12.1946
PPP1R9B	12.0001
NUAK2	12.0001
RP11-492M19.3	12.0001
PHKBP1	12.0001
ZNF622	12.0001
CTD-2134P3.2	12.0001
PARP8	12.0001
MLXIP	11.6522
NEDD1	11.6522
KRT18P8	11.6522
FAM102B	11.6522
TIMM17A	11.6522
RANBP2	11.6522
RN7SKP141	11.6522
AC097493.1	11.6522
RP11-775D22.2	11.6522
SULT1A1	11.4436
RP11-394I13.3	11.4436
SLCO4C1	11.4436
IGKV3OR2-268	11.1139
ARL6IP5	11.1139
RP3-416J7.5	11.1139
PDIA4	11.1139
[truncated: 6,675 more rows]
