# Supplementary material for: Chromatin Accessibility Identifies Regulatory Elements Predictive of Gene Expression and Disease Outcome in Multiple Myeloma
Source: Oxford University Press journal article supplement (doi:10.1158/1078-0432.ccr-20-2931), 2021-03-17
Supplement: 10780432ccr202931-sup-248275_3_supp_6952787_qp7cc7.xlsx [file 10780432ccr202931-sup-248275_3_supp_6952787_qp7cc7.xlsx]

## Sheet: Supp Data 7 v2 - raw counts
Supplementary Data 8. ATAC-seq data for Emory patients - raw read counts
chr	start	end	GRCh37.tsKg	GRCh37.tsDist	GRCh37.tsKg	GRCh37.tsRelPos	GRCh37.tssRelPos	GRCh37.prom	GRCh37.tsEnd	GRCh37.tsStrand	GRCh37.tsRelPos	GRCh37.tsSymbol	1539	1555-fresh	1555	1557-fresh	1557	1560-fresh	1561	1562-fresh	1562	1563-fresh	1563	1573	1575
10	100013919	100014376	ENSG00000138131	0	ENSG00000138131	0.685214	0.469684	promoter	100028007	-	0.685214	LOXL4	0	48	6	3	2	0	13	0	2	3	4	4	14
10	100022349	100022722	ENSG00000138131	0	ENSG00000138131	0.275195	0.257004	promoter	100028007	-	0.275195	LOXL4	10	23	9	9	7	3	29	2	16	9	7	8	10
10	100028220	100028619	ENSG00000138131	-212	ENSG00000138131	-212	-212	promoter	100028007	-	-212	LOXL4	13	42	6	20	9	5	14	11	13	8	12	6	14
10	100055286	100055644	ENSG00000138131	-27278	ENSG00000138131	-27278	-27278	distal	100028007	-	-27278	LOXL4	9	23	3	12	13	8	5	14	23	8	9	12	16
10	100059601	100059873	ENSG00000138131	-31593	ENSG00000138131	-31593	-31593	distal	100028007	-	-31593	LOXL4	1	27	9	1	2	0	3	1	1	2	4	1	4
10	100069341	100069542	ENSG00000138131	-41333	ENSG00000138131	-41333	-41333	distal	100028007	-	-41333	LOXL4	1	5	1	12	9	10	6	1	7	1	6	5	2
10	100083058	100083204	ENSG00000138131	-55050	ENSG00000138131	-55050	-55050	distal	100028007	-	-55050	LOXL4	5	5	0	4	5	2	9	2	2	2	1	3	13
10	100091729	100091939	ENSG00000119943	51382	ENSG00000119943	51382	55018	distal	100171634	-	51382	PYROXD2	4	5	1	10	9	1	1	2	6	5	5	16	5
10	100099535	100100610	ENSG00000119943	42711	ENSG00000119943	42711	46347	distal	100171634	-	42711	PYROXD2	157	410	106	107	77	127	222	71	143	115	98	47	256
10	100100728	100100923	ENSG00000119943	42398	ENSG00000119943	42398	46034	distal	100171634	-	42398	PYROXD2	8	27	9	6	5	3	25	2	6	5	5	3	16
10	100120974	100121591	ENSG00000119943	21730	ENSG00000119943	21730	25366	distal	100171634	-	21730	PYROXD2	76	4	2	80	97	125	206	18	17	32	42	29	173
10	100163485	100164638	ENSG00000119943	0	ENSG00000119943	0.362314	0.247068	promoter	100174941	-	0.362314	PYROXD2	40	4	2	3	4	2	38	85	122	33	33	9	6
10	100171325	100171605	ENSG00000119943	0	ENSG00000119943	0.114362	0.00098898	promoter	100174941	-	0.114362	PYROXD2	4	3	3	4	3	6	19	6	7	6	9	4	2
10	100174775	100175158	ENSG00000119943	0	ENSG00000119943	0.141271	0	promoter	100174915	-	0.141271	PYROXD2	2	1	2	3	2	0	2	27	25	12	12	11	19
10	100185549	100185732	ENSG00000107521	0	ENSG00000107521	1.00544	0.05713	promoter	100206630	-	1.00544	HPS1	3	11	3	12	5	2	13	0	6	5	12	1	3
10	100206074	100206703	ENSG00000107521	0	ENSG00000107521	0.134391	0	promoter	100206684	-	0.134391	HPS1	35	85	14	37	29	21	23	33	37	32	41	24	57
10	100220507	100220941	ENSG00000172987	0	ENSG00000172987	0.998485	-13822	distal	100995559	-	0.998485	HPSE2	8	7	5	13	12	8	33	7	12	15	19	7	5
10	100227100	100227574	ENSG00000172987	0	ENSG00000172987	0.989991	-20415	distal	100995559	-	0.989991	HPSE2	19	33	7	22	25	16	37	13	15	14	26	12	24
10	100396683	100397254	ENSG00000172987	0	ENSG00000172987	0.771521	-189998	distal	100995559	-	0.771521	HPSE2	8	0	3	10	12	44	19	14	19	11	15	3	9
10	100424198	100424511	ENSG00000172987	0	ENSG00000172987	0.736074	-217513	distal	100995559	-	0.736074	HPSE2	20	9	4	16	9	7	6	8	10	9	13	4	23
10	100654496	100654721	ENSG00000172987	0	ENSG00000172987	0.439385	118138	distal	100995559	-	0.439385	HPSE2	1	11	3	0	1	1	4	2	3	3	8	5	1
10	101130851	101131181	ENSG00000119946	0	ENSG00000119946	0.30664	0.306529	promoter	101137085	+	0.30664	CNNM1	7	6	1	1	6	7	15	3	3	6	8	4	29
10	101152378	101152669	ENSG00000119946	0	ENSG00000119946	0.973714	4552	distal	101154085	+	0.973714	CNNM1	11	9	2	16	4	8	14	5	7	12	12	9	11
10	101190116	101191014	ENSG00000120053	0	ENSG00000120053	0.0255866	0	promoter	101190381	-	0.0255866	GOT1	185	703	121	204	204	177	226	170	240	216	205	101	355
10	101300730	101300881	ENSG00000119919	4451	ENSG00000119919	4451	4451	distal	101296278	+	4451	NKX2-3	6	0	0	6	1	2	13	2	0	4	2	2	5
10	101315699	101316104	ENSG00000119919	19420	ENSG00000119919	19420	19420	distal	101296278	+	19420	NKX2-3	10	24	16	4	7	3	12	7	7	16	20	3	51
10	101372087	101372344	ENSG00000155287	0	ENSG00000155287	0.860335	0.785596	promoter	101380366	-	0.860335	SLC25A28	5	20	4	3	8	8	9	4	3	13	12	2	9
10	101378828	101379114	ENSG00000155287	0	ENSG00000155287	0.163881	0.0819996	promoter	101379926	-	0.163881	SLC25A28	38	108	26	29	12	18	22	32	36	48	56	17	72
10	101380169	101380775	ENSG00000155287	0	ENSG00000155287	0.0204718	0	promoter	101380366	-	0.0204718	SLC25A28	200	592	151	209	172	159	231	167	298	219	206	85	428
10	101380881	101381251	ENSG00000260475	0	ENSG00000260475	0.0799537	0.0787949	promoter	101381675	+	0.0799537	RP11-85A1.3	46	103	22	45	27	36	36	25	43	46	41	26	61
10	101418629	101419476	ENSG00000198018	0	ENSG00000198018	-0.0135661	0	promoter	101465997	+	-0.0135661	ENTPD7	93	297	43	115	68	71	82	51	96	92	87	37	142
10	101442631	101442786	ENSG00000198018	0	ENSG00000198018	0.500021	14377	distal	101465997	+	0.500021	ENTPD7	6	4	2	1	3	1	11	1	1	6	3	1	2
10	101469629	101469953	ENSG00000119929	0	ENSG00000119929	0.179419	4455	distal	101503080	+	0.179419	CUTC	6	4	2	8	8	9	27	2	3	7	13	2	1
10	101491578	101492712	ENSG00000014919	0	ENSG00000014919	0.0150121	0	promoter	101491857	-	0.0150121	COX15	81	214	58	95	54	69	90	72	98	84	101	42	99
10	101537764	101537945	ENSG00000023839	-4543	ENSG00000023839	-4543	-4543	distal	101611949	+	-4543	ABCC2	7	26	3	8	3	2	0	4	3	6	3	4	8
10	101539160	101539453	ENSG00000023839	-3035	ENSG00000023839	-3035	-3035	distal	101611949	+	-3035	ABCC2	3	32	4	0	2	2	0	1	1	0	4	4	1
10	101605554	101606020	ENSG00000023839	0	ENSG00000023839	0.907933	40140	distal	101611949	+	0.907933	ABCC2	15	38	12	21	23	12	33	19	23	26	30	14	28
10	101630154	101630359	ENSG00000107554	4974	ENSG00000107554	4974	15801	distal	101690753	-	4974	DNMBP	3	24	1	3	1	2	2	5	11	10	10	2	9
10	101668379	101668565	ENSG00000107554	0	ENSG00000107554	0.34372	0.331948	promoter	101673839	-	0.34372	DNMBP	6	9	2	0	5	0	1	2	2	6	3	5	3
10	101736808	101737055	ENSG00000107554	0	ENSG00000107554	0.244659	0.242813	promoter	101769676	-	0.244659	DNMBP	2	9	3	7	4	1	4	4	5	31	25	5	3
10	101743161	101743657	ENSG00000107554	0	ENSG00000107554	0.197369	0.19367	promoter	101769676	-	0.197369	DNMBP	3	53	10	2	2	1	1	2	2	1	5	0	3
10	101744042	101744453	ENSG00000107554	0	ENSG00000107554	0.190812	0.187745	promoter	101769676	-	0.190812	DNMBP	6	51	8	6	4	5	8	3	9	18	14	7	5
10	101753792	101754421	ENSG00000107554	0	ENSG00000107554	0.118236	0.113546	promoter	101769676	-	0.118236	DNMBP	20	213	59	14	11	14	27	34	68	36	54	5	34
10	101759081	101759456	ENSG00000107554	0	ENSG00000107554	0.0788659	0.0760671	promoter	101769676	-	0.0788659	DNMBP	4	50	8	4	1	6	4	2	5	16	14	10	8
10	101766009	101766415	ENSG00000107554	0	ENSG00000107554	0.027296	0.0242664	promoter	101769676	-	0.027296	DNMBP	7	55	13	17	14	4	38	8	11	41	36	37	12
10	101769009	101769428	ENSG00000107554	0	ENSG00000107554	0.00496494	0.00183859	promoter	101769676	-	0.00496494	DNMBP	20	60	13	27	10	25	14	22	33	13	18	9	21
10	101769619	101769788	ENSG00000107554	0	ENSG00000107554	0.00042429	0	promoter	101769676	-	0.00042429	DNMBP	5	21	5	5	2	3	4	4	8	2	8	1	21
10	101773831	101774493	ENSG00000107554	-4154	ENSG00000107554	-4154	-4154	distal	101769676	-	-4154	DNMBP	13	166	38	63	45	33	23	5	12	40	33	58	31
10	101780287	101780509	ENSG00000238472	830	ENSG00000238472	830	830	distal	101779456	+	830	snoU13	4	18	6	7	5	6	5	0	5	4	3	5	9
10	101781187	101781464	ENSG00000238472	1730	ENSG00000238472	1730	1730	distal	101779456	+	1730	snoU13	5	18	4	12	7	7	7	7	6	8	5	2	41
10	101804248	101804520	ENSG00000120054	0	ENSG00000120054	0.942093	4003	distal	101841634	-	0.942093	CPN1	2	22	4	4	1	8	4	8	10	4	7	2	2
10	101805757	101806214	ENSG00000120054	0	ENSG00000120054	0.904067	2309	distal	101841634	-	0.904067	CPN1	11	16	5	30	23	12	12	10	8	21	21	11	18
10	1018881	1019105	ENSG00000205740	0	ENSG00000205740	0.896182	0.883089	promoter	1034281	-	0.896182	AL359878.1	1	3	1	5	1	2	1	6	0	4	2	1	15
10	101908411	101908814	ENSG00000107566	1036	ENSG00000107566	1036	-4658	distal	101948091	-	1036	ERLIN1	4	8	9	4	13	6	11	14	22	24	29	9	3
10	101915837	101916001	ENSG00000107566	0	ENSG00000107566	0.960859	-12084	distal	101945786	-	0.960859	ERLIN1	1	4	1	3	1	0	2	5	4	2	8	6	19
10	101927301	101927789	ENSG00000107566	0	ENSG00000107566	0.593057	0.577369	promoter	101945786	-	0.593057	ERLIN1	9	38	9	13	4	2	8	17	20	25	22	7	13
10	101932745	101932934	ENSG00000107566	0	ENSG00000107566	0.418396	0.412301	promoter	101945786	-	0.418396	ERLIN1	0	3	1	1	1	3	1	2	1	13	13	0	2
10	101945139	101946360	ENSG00000107566	0	ENSG00000107566	0.0207578	0	promoter	101945786	-	0.0207578	ERLIN1	73	284	48	119	95	115	102	91	104	82	72	49	126
10	101988629	101989197	ENSG00000213341	0	ENSG00000213341	0.018078	0.00430774	promoter	101989376	-	0.018078	CHUK	23	60	16	22	17	20	36	23	21	22	24	19	27
10	101989272	101989539	ENSG00000213341	0	ENSG00000213341	0.00251688	0	promoter	101989376	-	0.00251688	CHUK	16	13	4	10	9	4	11	10	7	8	15	4	25
10	102026965	102027705	ENSG00000095485	0	ENSG00000095485	0.0263899	0	promoter	102027424	-	0.0263899	CWF19L1	27	83	26	29	24	30	46	19	29	41	32	26	47
10	102045800	102046969	ENSG00000196072	0	ENSG00000196072	0.109775	0	promoter	102046430	-	0.109775	BLOC1S2	85	270	60	89	64	95	126	150	183	98	100	39	133
10	102086610	102087415	ENSG00000107593	0	ENSG00000107593	0.111365	0.0549056	promoter	102090021	-	0.111365	PKD2L1	72	383	80	80	87	52	26	28	44	141	144	45	121
10	102098314	102098609	ENSG00000231188	0	ENSG00000231188	0.723469	0.69613	promoter	102106147	-	0.723469	RP11-34D15.2	19	31	6	19	8	12	16	11	14	10	11	8	10
10	102099092	102099284	ENSG00000231188	0	ENSG00000231188	0.651612	0.633786	promoter	102106147	-	0.651612	RP11-34D15.2	13	14	6	12	11	5	1	4	3	5	9	13	11
10	102106379	102107181	ENSG00000099194	0	ENSG00000099194	-0.0283456	0	promoter	102124591	+	-0.0283456	SCD	39	253	43	70	38	67	16	31	47	24	22	28	28
10	102124709	102124889	ENSG00000099194	117	ENSG00000099194	117	1332	distal	102124591	+	117	SCD	16	6	4	5	7	1	3	4	3	1	3	4	2
10	102130552	102131231	ENSG00000235823	-2140	ENSG00000235823	-2140	-2140	promoter	102143125	+	-2140	LINC00263	8	174	42	14	23	3	8	0	3	17	27	24	24
10	102132892	102133570	ENSG00000235823	0	ENSG00000235823	-0.0492156	0	promoter	102143125	+	-0.0492156	LINC00263	49	260	36	72	43	80	93	59	77	54	50	35	110
10	102193447	102193919	ENSG00000273030	20268	ENSG00000273030	20268	20268	distal	102173178	+	20268	RP11-285F16.1	26	58	23	26	26	20	41	11	27	29	26	17	49
10	102241215	102242708	ENSG00000075290	0	ENSG00000075290	0.889581	3694	distal	102243501	+	0.889581	WNT8B	78	239	64	89	72	84	95	57	78	81	69	39	128
10	102256229	102256821	ENSG00000075826	0	ENSG00000075826	0.891974	0.59263	promoter	102257996	-	0.891974	SEC31B	5	83	28	0	6	2	2	5	1	4	5	3	23
10	102270716	102270931	ENSG00000255339	0	ENSG00000255339	0.843414	-2165	promoter	102289638	-	0.843414	NDUFB8	2	4	2	2	12	1	5	4	2	0	4	0	2
10	102278475	102278850	ENSG00000255339	0	ENSG00000255339	0.858045	0.0222945	promoter	102289621	-	0.858045	NDUFB8	5	19	5	14	18	6	9	5	4	21	11	8	8
10	102288297	102288966	ENSG00000166136	0	ENSG00000166136	1.60167	0	promoter	102289636	-	1.60167	NDUFB8	21	142	35	8	6	9	14	16	8	19	12	26	15
10	102289243	102290059	ENSG00000166136	0	ENSG00000166136	0.470096	0	promoter	102289636	-	0.470096	NDUFB8	17	93	27	51	26	35	23	23	35	28	27	13	49
10	102291674	102291876	ENSG00000166135	0	ENSG00000166135	0.162488	-1916	promoter	102306338	+	0.162488	HIF1AN	40	27	5	1	9	1	25	4	2	4	5	7	48
10	102295299	102295942	ENSG00000166135	0	ENSG00000166135	-0.0371034	0	promoter	102305725	+	-0.0371034	HIF1AN	68	180	48	69	62	64	86	41	62	72	76	35	110
10	102321779	102322035	ENSG00000166135	2023	ENSG00000166135	2023	16524	distal	102319755	+	2023	HIF1AN	5	27	6	3	2	10	1	9	11	15	15	7	9
10	102440445	102440635	ENSG00000075891	-54724	ENSG00000075891	-54724	-54724	distal	102566356	+	-54724	PAX2	1	1	3	2	3	1	3	4	9	4	4	1	3
10	102456311	102456570	ENSG00000075891	-38789	ENSG00000075891	-38789	-38789	distal	102566356	+	-38789	PAX2	7	11	5	2	3	4	17	1	2	6	5	1	17
10	102490953	102491223	ENSG00000075891	-4136	ENSG00000075891	-4136	-4136	distal	102566356	+	-4136	PAX2	4	15	4	5	9	13	15	5	3	3	5	5	9
10	10251205	10251477	ENSG00000200849	-23096	ENSG00000200849	-23096	-23096	distal	10274675	+	-23096	Y_RNA	4	0	2	9	5	4	1	3	8	23	20	3	26
10	10255188	10255708	ENSG00000200849	-18865	ENSG00000200849	-18865	-18865	distal	10274675	+	-18865	Y_RNA	18	7	2	11	4	10	3	15	33	37	31	5	43
10	102588744	102588972	ENSG00000075891	0	ENSG00000075891	0.988674	77958	distal	102589698	+	0.988674	PAX2	1	1	0	3	3	7	2	10	13	3	4	1	3
10	102607176	102607668	ENSG00000075891	17477	ENSG00000075891	17477	59262	distal	102589698	+	17477	PAX2	6	5	5	10	15	16	8	15	34	10	10	3	7
10	10264861	10265099	ENSG00000200849	-9474	ENSG00000200849	-9474	-9474	distal	10274675	+	-9474	Y_RNA	17	2	3	1	2	1	4	2	3	2	3	2	10
10	102664681	102665076	ENSG00000222072	1854	ENSG00000222072	1854	1854	distal	102667037	-	1854	Y_RNA	1	17	8	5	7	4	35	4	3	23	19	5	39
10	102672278	102673402	ENSG00000272572	0	ENSG00000272572	0.133252	0	promoter	102672496	-	0.133252	RP11-179B2.2	139	381	87	117	98	94	142	88	129	149	130	40	193
10	102728816	102729505	ENSG00000055950	0	ENSG00000055950	1.02249	0	promoter	102746953	-	1.02249	MRPL43	1	59	11	34	17	4	16	13	19	17	15	6	26
10	102729837	102730092	ENSG00000055950	0	ENSG00000055950	0.964934	0.163636	promoter	102746953	-	0.964934	MRPL43	5	13	4	14	18	7	12	14	21	10	6	12	18
10	102746610	102747484	ENSG00000055950	0	ENSG00000055950	0.713514	0	promoter	102747270	-	0.713514	MRPL43	36	116	23	47	33	22	30	27	25	23	33	19	49
10	102757224	102758273	ENSG00000107816	0	ENSG00000107816	-0.164796	0	promoter	102763451	+	-0.164796	LZTS2	68	216	47	87	37	55	77	43	84	50	46	35	78
10	102758938	102759142	ENSG00000107816	0	ENSG00000107816	0.11599	-90	promoter	102762703	+	0.11599	LZTS2	13	61	17	17	10	17	19	6	17	17	15	8	21
10	102772576	102773255	ENSG00000186862	0	ENSG00000186862	0.875416	0.777022	promoter	102778626	-	0.875416	PDZD7	47	173	56	44	51	44	95	65	88	75	64	25	60
10	102778781	102779151	ENSG00000186862	0	ENSG00000186862	0.8774	-154	promoter	102790890	-	0.8774	PDZD7	6	44	8	16	12	5	23	13	16	20	30	15	11
10	102790790	102791441	ENSG00000186862	0	ENSG00000186862	0.0101427	0	promoter	102790871	-	0.0101427	PDZD7	66	258	48	89	40	69	59	73	73	43	43	30	83
10	102791533	102792853	ENSG00000107819	0	ENSG00000107819	-0.150203	0	promoter	102796924	+	-0.150203	SFXN3	80	408	109	78	55	73	98	101	129	64	40	38	108
10	102800976	102801261	ENSG00000107819	0	ENSG00000107819	0.993613	0.993309	promoter	102800997	+	0.993613	SFXN3	18	62	8	8	18	22	19	19	18	13	13	11	33
10	102802360	102803096	ENSG00000107819	1361	ENSG00000107819	1361	1362	distal	102800998	+	1361	SFXN3	77	250	50	55	55	69	71	57	60	51	38	45	106
10	102809918	102810461	ENSG00000107819	8919	ENSG00000107819	8919	9324	distal	102800998	+	8919	SFXN3	14	55	15	16	12	9	12	9	9	15	15	13	27
10	102819846	102820101	ENSG00000273162	0	ENSG00000273162	0.938525	0.67623	promoter	102820762	-	0.938525	RP11-108L7.15	11	26	12	10	14	11	23	12	10	14	24	9	15
10	102820302	102821228	ENSG00000273162	0	ENSG00000273162	0.471311	0	promoter	102820762	-	0.471311	RP11-108L7.15	37	156	46	62	29	57	49	53	65	53	64	38	95
10	102826225	102826628	ENSG00000107821	0	ENSG00000107821	0.10994	0.108434	promoter	102826816	+	0.10994	KAZALD1	23	63	11	12	7	10	28	20	23	7	13	4	27
10	102827312	102827828	ENSG00000107821	0	ENSG00000107821	0.68559	495	promoter	102827888	+	0.68559	KAZALD1	13	87	24	22	5	16	22	15	28	17	18	10	25
10	102831008	102831228	ENSG00000107821	3119	ENSG00000107821	3119	4191	distal	102827888	+	3119	KAZALD1	6	29	7	7	6	2	1	11	15	4	10	7	6
10	102855293	102855642	ENSG00000236311	0	ENSG00000236311	0.871919	-26893	distal	102890883	-	0.871919	TLX1NB	10	40	9	20	15	13	14	8	12	14	18	15	17
10	102881190	102881355	ENSG00000236311	0	ENSG00000236311	0.237469	-1180	promoter	102890883	-	0.237469	TLX1NB	6	18	2	17	6	4	4	12	7	10	10	3	15
10	102901931	102902414	ENSG00000226740	-2462	ENSG00000226740	-2462	-2462	promoter	102899468	-	-2462	RP11-31L23.3	22	72	12	31	22	20	31	13	16	18	27	18	25
10	102918455	102918777	ENSG00000237579	-17302	ENSG00000237579	-17302	-17302	distal	102953904	+	-17302	RP11-324L3.1	30	56	14	8	8	7	10	7	11	7	6	6	21
10	102921492	102921800	ENSG00000237579	-14279	ENSG00000237579	-14279	-14279	distal	102953904	+	-14279	RP11-324L3.1	11	22	5	7	15	11	28	13	9	15	18	8	20
10	102973475	102973708	ENSG00000138136	13024	ENSG00000138136	13024	-15642	distal	102989551	-	13024	LBX1	13	24	1	11	11	9	15	9	14	11	12	7	18
10	102974422	102974847	ENSG00000138136	11885	ENSG00000138136	11885	-14503	distal	102989551	-	11885	LBX1	27	37	13	22	18	15	21	9	9	26	18	6	27
10	10298971	10299164	ENSG00000272436	0	ENSG00000272436	1.54209	0.888889	promoter	10299429	-	1.54209	CUX2P1	5	8	2	4	1	4	4	8	11	11	7	4	10
10	103032000	103032376	ENSG00000227128	2094	ENSG00000227128	2094	-4234	distal	103029905	+	2094	LBX1-AS1	18	21	9	13	20	9	30	15	7	6	11	3	15
10	103057621	103057994	ENSG00000222238	-9291	ENSG00000222238	-9291	-9291	distal	103067475	+	-9291	RNU2-43P	13	23	4	17	21	13	12	6	10	13	14	8	13
10	103090659	103090859	ENSG00000230967	-7507	ENSG00000230967	-7507	-7507	distal	103083151	-	-7507	RP11-107I14.5	3	0	2	10	7	1	13	1	6	13	7	2	8
10	103113436	103114033	ENSG00000166167	0	ENSG00000166167	-0.00292421	0	promoter	103285951	+	-0.00292421	BTRC	157	374	123	127	116	114	179	117	196	162	195	76	293
10	103201930	103202258	ENSG00000166167	0	ENSG00000166167	0.510869	-70220	distal	103285840	+	0.510869	BTRC	10	34	10	7	4	6	24	12	12	7	11	9	8
10	103227115	103227496	ENSG00000166167	0	ENSG00000166167	0.657678	-67644	distal	103285840	+	0.657678	BTRC	7	24	10	12	12	10	31	16	15	25	20	8	8
10	103249181	103249406	ENSG00000166167	0	ENSG00000166167	0.786306	-45734	distal	103285840	+	0.786306	BTRC	2	22	5	3	0	4	3	0	5	5	3	7	4
10	103295631	103296079	ENSG00000166167	0	ENSG00000166167	0.0309989	0.0309357	promoter	103310948	+	0.0309989	BTRC	3	95	17	9	5	0	11	2	4	22	22	8	3
10	103329541	103330393	ENSG00000166171	0	ENSG00000166171	-0.0297421	0	promoter	103356408	+	-0.0297421	DPCD	26	157	35	59	38	41	51	38	54	20	21	27	36
10	103347507	103348323	ENSG00000166169	0	ENSG00000166169	0.16575	0	promoter	103347989	-	0.16575	POLL	64	213	48	89	54	89	76	48	58	68	62	23	118
10	103355730	103355924	ENSG00000166171	0	ENSG00000166171	0.0862455	0.0861776	promoter	103369196	+	0.0862455	DPCD	2	11	6	1	1	1	6	4	3	1	1	2	4
10	103362587	103362769	ENSG00000166171	0	ENSG00000166171	0.234364	1332	distal	103369418	+	0.234364	DPCD	7	13	5	9	8	5	17	12	6	5	17	13	8
10	103371409	103371576	ENSG00000107829	0	ENSG00000107829	1.00334	0.891043	promoter	103372910	-	1.00334	FBXW4	3	12	2	8	4	2	5	4	0	4	1	2	2
10	103377201	103378007	ENSG00000107829	0	ENSG00000107829	0.919875	-4290	distal	103455016	-	0.919875	FBXW4	20	97	24	22	14	10	6	23	19	30	23	29	27
10	1033899	1034932	ENSG00000205740	0	ENSG00000205740	0.02223	0	promoter	1034281	-	0.02223	AL359878.1	63	213	33	69	44	67	78	62	88	52	61	24	131
10	103443180	103443345	ENSG00000107829	0	ENSG00000107829	0.168283	-6708	distal	103455052	-	0.168283	FBXW4	0	13	4	0	0	1	0	1	1	0	0	0	2
10	103453485	103454095	ENSG00000107829	0	ENSG00000107829	0.0222118	0.0108756	promoter	103455052	-	0.0222118	FBXW4	28	134	32	53	29	31	28	34	44	27	33	18	27
10	103454928	103455183	ENSG00000107829	0	ENSG00000107829	0.00175767	0	promoter	103455052	-	0.00175767	FBXW4	11	21	8	13	6	15	12	7	8	6	6	2	17
10	103538539	103538768	ENSG00000107833	2313	ENSG00000107833	2313	-2684	distal	103543170	-	2313	NPM3	11	57	10	21	13	16	11	14	22	20	10	7	16
10	103539719	103539951	ENSG00000107833	1130	ENSG00000107833	1130	1532	distal	103543170	-	1130	NPM3	14	52	18	25	13	18	11	11	15	23	20	6	29
10	103542579	103543313	ENSG00000107833	0	ENSG00000107833	0.30963	0	promoter	103543132	-	0.30963	NPM3	31	168	27	42	20	26	51	33	35	41	31	19	44
10	103577949	103578790	ENSG00000198408	0	ENSG00000198408	0.0579249	0	promoter	103578696	-	0.0579249	MGEA5	150	437	117	152	105	125	145	145	234	164	174	80	259
10	103589421	103589611	ENSG00000120049	0	ENSG00000120049	0.872983	-116	promoter	103603325	-	0.872983	KCNIP2	9	38	11	15	10	5	10	13	13	15	7	2	24
10	103589783	103590918	ENSG00000120049	0	ENSG00000120049	0.850254	0	promoter	103603325	-	0.850254	KCNIP2	80	333	75	115	86	82	86	91	128	110	115	57	105
10	103600333	103600866	ENSG00000120049	0	ENSG00000120049	0.187857	-703	promoter	103603325	-	0.187857	KCNIP2	17	118	24	21	19	25	33	24	26	13	24	8	41
10	103600927	103601137	ENSG00000120049	0	ENSG00000120049	0.150562	-1297	promoter	103603325	-	0.150562	KCNIP2	6	9	2	3	2	8	7	6	11	1	5	3	8
10	103603437	103603835	ENSG00000120049	0	ENSG00000120049	0.00536694	0	promoter	103603526	-	0.00536694	KCNIP2	8	36	13	22	14	17	6	14	32	26	11	4	4
10	103618398	103619124	ENSG00000120029	0	ENSG00000120029	0.93807	-14720	distal	103815950	-	0.93807	C10orf76	33	45	12	32	24	39	55	35	51	47	47	11	57
10	103649474	103649644	ENSG00000120029	0	ENSG00000120029	0.790507	0	promoter	103815950	-	0.790507	C10orf76	10	16	4	4	6	3	11	4	5	9	7	8	6
10	103655644	103655883	ENSG00000120029	0	ENSG00000120029	0.761209	-6150	distal	103815950	-	0.761209	C10orf76	1	22	4	5	7	2	3	7	6	4	6	2	4
10	103663698	103663851	ENSG00000120029	0	ENSG00000120029	0.722965	-14204	distal	103815950	-	0.722965	C10orf76	1	0	0	1	0	0	13	3	2	6	1	3	0
10	103695144	103695372	ENSG00000120029	0	ENSG00000120029	0.573644	16989	distal	103815950	-	0.573644	C10orf76	1	15	7	2	1	2	4	3	1	4	1	4	1
10	103699044	103699340	ENSG00000120029	0	ENSG00000120029	0.555125	13021	distal	103815950	-	0.555125	C10orf76	21	3	1	4	5	5	5	4	1	22	23	5	1
10	103724747	103725124	ENSG00000120029	0	ENSG00000120029	0.433075	-12285	distal	103815950	-	0.433075	C10orf76	1	48	16	5	3	0	1	4	3	6	9	1	1
10	103728911	103729194	ENSG00000120029	0	ENSG00000120029	0.413302	-16449	distal	103815950	-	0.413302	C10orf76	15	72	9	4	7	1	10	1	4	9	7	8	4
10	103732577	103732866	ENSG00000120029	0	ENSG00000120029	0.395894	-20115	distal	103815950	-	0.395894	C10orf76	1	46	12	1	1	2	2	7	4	6	6	4	1
10	103733313	103733691	ENSG00000120029	0	ENSG00000120029	0.3924	-20851	distal	103815950	-	0.3924	C10orf76	18	57	10	10	5	6	13	11	23	13	15	13	23
10	103746099	103746628	ENSG00000120029	0	ENSG00000120029	0.331686	3679	distal	103815950	-	0.331686	C10orf76	21	55	15	15	11	9	5	13	23	30	20	21	20
10	103769533	103769889	ENSG00000120029	0	ENSG00000120029	0.22041	-7711	distal	103815950	-	0.22041	C10orf76	3	16	9	22	16	7	27	5	6	9	17	5	13
10	103815306	103816224	ENSG00000120029	0	ENSG00000120029	0.0240793	0	promoter	103815950	-	0.0240793	C10orf76	36	170	38	51	38	33	58	33	47	59	64	31	85
10	103824707	103825274	ENSG00000166189	0	ENSG00000166189	-0.166352	0	promoter	103827792	+	-0.166352	HPS6	37	166	28	49	26	37	44	29	52	42	32	15	83
10	103832632	103832929	ENSG00000166189	4839	ENSG00000166189	4839	4839	distal	103827792	+	4839	HPS6	6	19	9	15	14	5	17	10	7	6	10	9	17
10	103874577	103875048	ENSG00000198728	0	ENSG00000198728	0.573233	0	promoter	103880205	-	0.573233	LDB1	46	155	28	53	27	37	35	35	41	30	28	25	71
10	103879270	103879440	ENSG00000198728	0	ENSG00000198728	0.0952332	0.0778163	promoter	103880205	-	0.0952332	LDB1	15	43	13	14	16	19	15	12	18	10	16	14	10
10	103880147	103880961	ENSG00000198728	0	ENSG00000198728	0.00590752	0	promoter	103880205	-	0.00590752	LDB1	29	117	29	43	24	38	31	39	45	19	22	13	37
10	103892259	103893082	ENSG00000148840	0	ENSG00000148840	-0.0313155	0	promoter	103909977	+	-0.0313155	PPRC1	141	433	111	148	112	122	164	134	177	173	156	82	259
10	103893528	103893957	ENSG00000148840	0	ENSG00000148840	0.0425495	0.0424913	promoter	103909977	+	0.0425495	PPRC1	29	105	16	35	21	26	46	36	64	39	31	8	35
10	103911658	103912469	ENSG00000166197	0	ENSG00000166197	-0.0448712	0	promoter	103923627	+	-0.0448712	NOLC1	151	368	83	120	93	105	140	108	134	114	118	68	219
10	103929125	103929746	ENSG00000166197	5497	ENSG00000166197	5497	5501	distal	103923627	+	5497	NOLC1	31	117	26	67	41	23	34	37	40	26	35	28	47
10	103945753	103946371	ENSG00000166197	22125	ENSG00000166197	22125	22129	distal	103923627	+	22125	NOLC1	2	131	35	28	20	25	8	32	43	3	7	31	1
10	103949036	103949632	ENSG00000166197	25408	ENSG00000166197	25408	25412	distal	103923627	+	25408	NOLC1	23	121	36	28	18	22	40	21	48	41	46	24	49
10	103953078	103953232	ENSG00000166197	29450	ENSG00000166197	29450	29454	distal	103923627	+	29450	NOLC1	0	0	2	1	2	1	0	1	0	14	18	0	7
10	103962235	103962598	ENSG00000119915	-23486	ENSG00000119915	-23486	-23486	distal	103989346	+	-23486	ELOVL3	4	17	9	9	7	6	3	8	5	4	2	6	5
10	103970016	103970181	ENSG00000119915	-15903	ENSG00000119915	-15903	-15903	distal	103989346	+	-15903	ELOVL3	2	23	8	2	3	1	0	1	4	1	2	0	0
10	103971326	103971856	ENSG00000119915	-14228	ENSG00000119915	-14228	-14228	distal	103989346	+	-14228	ELOVL3	8	113	43	11	10	11	11	15	13	39	34	14	40
10	103985782	103986223	ENSG00000119915	0	ENSG00000119915	-0.0929163	0	promoter	103989346	+	-0.0929163	ELOVL3	51	165	28	56	36	39	50	34	54	37	34	25	67
10	103989528	103990447	ENSG00000107859	0	ENSG00000107859	1.03676	0.73379	promoter	104001231	-	1.03676	PITX3	37	174	35	36	19	28	59	27	33	33	38	29	44
10	103990641	103991015	ENSG00000107859	0	ENSG00000107859	0.938164	0.43437	promoter	104001231	-	0.938164	PITX3	5	63	11	9	7	9	7	2	9	10	6	8	7
10	103991440	103991807	ENSG00000107859	0	ENSG00000107859	0.867381	0.0168687	promoter	104001231	-	0.867381	PITX3	5	71	12	10	10	15	8	7	11	10	14	4	8
10	104001316	104001584	ENSG00000107859	-84	ENSG00000107859	-84	-84	promoter	104001231	-	-84	PITX3	45	69	16	52	24	10	26	23	53	17	11	19	16
10	104004805	104005518	ENSG00000107862	0	ENSG00000107862	-0.00352341	0	promoter	104142656	+	-0.00352341	GBF1	211	570	126	168	145	151	230	167	251	203	213	91	420
10	104044923	104045216	ENSG00000107862	0	ENSG00000107862	0.288526	23859	distal	104142656	+	0.288526	GBF1	3	26	1	2	2	0	1	3	2	7	4	2	0
10	104059716	104060486	ENSG00000107862	0	ENSG00000107862	0.396216	38652	distal	104142656	+	0.396216	GBF1	8	118	33	8	2	10	13	14	16	24	30	10	6
10	104100858	104101180	ENSG00000107862	0	ENSG00000107862	0.69572	-17675	distal	104142656	+	0.69572	GBF1	3	30	7	4	3	0	3	2	0	6	7	1	1
10	104111959	104112152	ENSG00000107862	0	ENSG00000107862	0.776533	-6703	distal	104142656	+	0.776533	GBF1	3	11	5	7	8	7	10	12	3	4	15	5	6
10	104144662	104144827	ENSG00000107862	2005	ENSG00000107862	2005	-9039	distal	104142656	+	2005	GBF1	1	11	3	4	1	2	2	3	1	0	5	3	1
10	104153760	104154717	ENSG00000077150	0	ENSG00000077150	-0.0749338	0	promoter	104162281	+	-0.0749338	NFKB2	198	697	175	192	136	133	142	141	219	142	145	70	276
10	104155243	104155903	ENSG00000077150	0	ENSG00000077150	-0.0322675	0	promoter	104162281	+	-0.0322675	NFKB2	65	268	45	71	46	52	83	77	73	98	84	39	103
10	104159164	104159545	ENSG00000077150	0	ENSG00000077150	0.671026	-789	promoter	104159818	+	0.671026	NFKB2	24	152	19	24	11	20	33	13	29	18	32	7	34
10	104163550	104163802	ENSG00000059915	0	ENSG00000059915	0.932198	599	distal	104179691	-	0.932198	PSD	10	68	18	19	14	19	27	16	22	25	29	11	23
10	104180323	104181169	ENSG00000059915	0	ENSG00000059915	0.201491	0	promoter	104181296	-	0.201491	PSD	90	323	75	94	72	80	91	78	89	87	95	51	116
10	104181910	104182263	ENSG00000107872	0	ENSG00000107872	0.974016	-613	promoter	104181945	+	0.974016	FBXL15	15	71	23	2	5	6	10	4	3	8	13	5	7
10	104182396	104182700	ENSG00000107872	0	ENSG00000107872	0.849576	-1099	promoter	104182893	+	0.849576	FBXL15	9	62	15	15	7	8	11	13	12	13	17	11	8
10	104185985	104186419	ENSG00000107874	0	ENSG00000107874	0.743131	-1923	promoter	104192341	-	0.743131	CUEDC2	4	2	1	3	1	3	64	5	1	7	10	4	5
10	104191952	104192740	ENSG00000107874	0	ENSG00000107874	0.0454811	0	promoter	104192341	-	0.0454811	CUEDC2	41	217	37	44	39	53	61	42	67	46	68	27	100
10	104209257	104209741	ENSG00000120055	0	ENSG00000120055	1.19754	0	promoter	104211300	-	1.19754	C10orf95	37	72	23	35	14	25	35	17	27	27	38	16	49
10	104209890	104210293	ENSG00000120055	0	ENSG00000120055	0.826495	0	promoter	104211300	-	0.826495	C10orf95	9	57	14	11	2	14	12	7	10	13	13	8	7
10	104212791	104213002	ENSG00000269609	0	ENSG00000269609	0.739288	-594	promoter	104213296	+	0.739288	RP11-18I14.10	7	36	9	4	5	10	11	13	12	17	16	3	4
10	104220836	104221322	ENSG00000138111	0	ENSG00000138111	-0.0308203	0	promoter	104232007	+	-0.0308203	TMEM180	26	82	23	29	14	29	13	14	20	27	18	16	29
10	104238646	104239157	ENSG00000138107	0	ENSG00000138107	1.01485	-3638	distal	104262435	-	1.01485	ACTR1A	25	54	17	23	21	17	34	9	17	18	27	12	31
10	104261669	104262837	ENSG00000138107	0	ENSG00000138107	0.03778	0	promoter	104262411	-	0.03778	ACTR1A	227	679	162	218	137	166	279	207	277	255	213	115	366
10	104263441	104263755	ENSG00000107882	0	ENSG00000107882	-0.0023389	0	promoter	104393292	+	-0.0023389	SUFU	75	200	52	80	56	50	116	46	72	66	99	35	144
10	104271579	104271819	ENSG00000107882	0	ENSG00000107882	0.0675772	0.0675685	promoter	104378416	+	0.0675772	SUFU	6	20	4	2	5	1	1	1	8	5	10	6	5
10	104343547	104343969	ENSG00000107882	0	ENSG00000107882	0.69568	-6596	distal	104378416	+	0.69568	SUFU	15	45	18	16	18	11	29	8	14	15	25	12	23
10	104401730	104402209	ENSG00000272933	339	ENSG00000272933	339	339	promoter	104403897	-	339	RP11-47A8.5	64	179	44	63	58	52	76	66	80	58	63	40	140
10	104404746	104404953	ENSG00000171206	0	ENSG00000171206	0.00845281	0.00836993	promoter	104416711	+	0.00845281	TRIM8	26	99	13	34	13	27	32	7	15	12	12	12	42
10	104405572	104406416	ENSG00000171206	0	ENSG00000171206	0.076904	0.0768211	promoter	104416711	+	0.076904	TRIM8	189	806	161	145	89	133	153	167	245	195	170	65	278
10	104412129	104412690	ENSG00000171206	0	ENSG00000171206	0.406839	-2347	promoter	104416726	+	0.406839	TRIM8	47	49	8	48	23	22	6	43	54	67	57	14	18
10	104420707	104421315	ENSG00000171206	2542	ENSG00000171206	2542	3862	distal	104418164	+	2542	TRIM8	39	126	17	33	24	24	20	30	21	16	12	15	64
10	104433770	104434241	ENSG00000138175	0	ENSG00000138175	0.993067	16925	distal	104474164	-	0.993067	ARL3	38	6	3	11	10	21	18	42	64	1	8	23	25
10	104438544	104438943	ENSG00000138175	0	ENSG00000138175	0.875701	21699	distal	104474164	-	0.875701	ARL3	9	40	10	8	4	15	22	8	8	19	10	12	18
10	104471381	104471633	ENSG00000138175	0	ENSG00000138175	0.0684187	0.0621988	promoter	104474164	-	0.0684187	ARL3	18	116	32	38	16	20	14	3	4	4	5	20	3
10	104473556	104474776	ENSG00000138175	0	ENSG00000138175	0.0149474	0	promoter	104474164	-	0.0149474	ARL3	136	507	98	209	128	129	137	114	164	184	145	73	227
10	104503253	104504269	ENSG00000166272	0	ENSG00000166272	-0.00655874	0	promoter	104575997	+	-0.00655874	WBP1L	115	279	73	87	82	88	130	92	144	122	127	60	229
10	104512979	104513266	ENSG00000166272	0	ENSG00000166272	0.12802	0.128006	promoter	104575997	+	0.12802	WBP1L	7	8	3	4	6	11	18	0	3	9	8	7	2
10	104531808	104532465	ENSG00000166272	0	ENSG00000166272	0.388557	-3540	distal	104575997	+	0.388557	WBP1L	45	137	34	44	35	25	15	92	146	35	53	53	26
10	104536738	104537242	ENSG00000166272	0	ENSG00000166272	0.0182931	0.0182681	promoter	104576021	+	0.0182931	WBP1L	2	4	1	3	3	71	97	1	2	41	29	14	7
10	104541389	104541761	ENSG00000166272	0	ENSG00000166272	0.134525	0.1345	promoter	104576021	+	0.134525	WBP1L	4	5	0	9	3	40	2	1	1	2	3	3	2
10	104555994	104556709	ENSG00000166272	0	ENSG00000166272	0.499513	-6976	distal	104576021	+	0.499513	WBP1L	25	162	31	15	8	22	78	25	38	52	46	20	38
10	104594643	104595010	ENSG00000148795	0	ENSG00000148795	0.641787	0.548363	promoter	104597171	-	0.641787	CYP17A1	8	31	5	11	16	11	15	9	14	13	16	7	12
10	10460311	10460764	ENSG00000270111	736	ENSG00000270111	736	736	distal	10504312	-	736	RP11-271F18.4	3	2	2	5	10	6	3	20	27	28	29	3	23
10	104613825	104614503	ENSG00000166275	0	ENSG00000166275	-0.0531318	0	promoter	104620584	+	-0.0531318	C10orf32	79	170	47	65	37	48	70	65	75	57	62	42	111
10	104677273	104678332	ENSG00000148842	0	ENSG00000148842	-0.00525645	0	promoter	104838108	+	-0.00525645	CNNM2	196	534	146	167	128	145	169	131	232	193	158	88	283
10	104683418	104683790	ENSG00000148842	0	ENSG00000148842	0.0331512	0.033145	promoter	104838108	+	0.0331512	CNNM2	6	28	3	9	2	4	7	3	1	9	10	6	19
10	104813662	104814422	ENSG00000148842	0	ENSG00000148842	0.847207	-13770	distal	104838108	+	0.847207	CNNM2	29	96	27	2	4	31	103	37	53	43	36	25	69
10	104829325	104829687	ENSG00000148842	0	ENSG00000148842	0.131735	0.131619	promoter	104836786	+	0.131735	CNNM2	8	35	8	17	12	15	25	8	11	10	15	19	16
10	104870807	104871117	ENSG00000076685	0	ENSG00000076685	0.723737	-4362	distal	104899949	-	0.723737	NT5C2	16	64	9	16	6	15	12	9	10	19	7	6	32
10	104871412	104872193	ENSG00000076685	0	ENSG00000076685	1.0011	-4967	distal	104953055	-	1.0011	NT5C2	34	180	28	39	25	43	60	32	38	51	37	20	30
10	104892696	104892961	ENSG00000076685	0	ENSG00000076685	0.74012	0.173521	promoter	104953055	-	0.74012	NT5C2	2	23	10	8	5	2	6	5	4	5	5	3	5
10	104895027	104895231	ENSG00000076685	0	ENSG00000076685	0.711537	0.117146	promoter	104953055	-	0.711537	NT5C2	3	12	6	8	5	1	15	1	4	4	8	9	5
10	104937156	104937355	ENSG00000076685	0	ENSG00000076685	0.325773	1304	distal	104941077	-	0.325773	NT5C2	4	32	5	15	13	3	0	7	9	12	14	3	9
10	104940887	104941405	ENSG00000076685	0	ENSG00000076685	0.015786	0	promoter	104941077	-	0.015786	NT5C2	17	146	42	44	54	1	21	24	37	44	46	26	41
10	104951870	104952628	ENSG00000076685	0	ENSG00000076685	0.0145304	0.00383307	promoter	104953055	-	0.0145304	NT5C2	23	141	24	36	17	18	32	24	45	33	27	9	29
10	105000081	105000246	ENSG00000235376	-5397	ENSG00000235376	-5397	-5397	distal	105007773	+	-5397	RP11-332O19.5	7	14	5	7	9	1	1	2	4	8	9	4	5
10	105001566	105001804	ENSG00000235376	-3839	ENSG00000235376	-3839	-3839	distal	105007773	+	-3839	RP11-332O19.5	5	14	3	4	3	1	4	4	3	18	18	7	3
10	105004531	105004719	ENSG00000235376	-924	ENSG00000235376	-924	-924	promoter	105007773	+	-924	RP11-332O19.5	4	14	9	11	5	4	15	3	5	13	15	9	7
10	105010697	105010890	ENSG00000235376	2923	ENSG00000235376	2923	2923	distal	105007773	+	2923	RP11-332O19.5	9	3	4	5	4	1	7	11	1	3	7	5	8
10	105058712	105058877	ENSG00000156374	3675	ENSG00000156374	3675	13315	distal	105110836	-	3675	PCGF6	1	12	3	0	0	2	0	2	1	2	6	5	1
10	105110376	105111148	ENSG00000156374	0	ENSG00000156374	0.00963423	0	promoter	105110838	-	0.00963423	PCGF6	17	92	18	17	10	22	18	15	28	23	19	7	37
10	105127427	105127812	ENSG00000148835	0	ENSG00000148835	-0.0140772	0	promoter	105148822	+	-0.0140772	TAF5	20	58	27	18	10	14	21	15	29	36	43	13	42
10	105128164	105128793	ENSG00000148835	0	ENSG00000148835	0.0208551	0.0208077	promoter	105148822	+	0.0208551	TAF5	50	177	38	43	31	34	43	54	67	42	59	33	78
10	105155687	105156832	ENSG00000173915	0	ENSG00000173915	0.0722762	0	promoter	105156223	-	0.0722762	USMG5	119	395	69	94	73	97	150	83	137	120	111	44	199
10	105176680	105176969	ENSG00000148843	0	ENSG00000148843	0.408408	-7771	distal	105206049	+	0.408408	PDCD11	7	6	2	6	2	4	3	1	4	14	13	5	8
10	105210930	105211289	ENSG00000138172	0	ENSG00000138172	0.352891	0.0200308	promoter	105211345	-	0.352891	CALHM2	5	52	8	7	7	12	7	10	11	6	6	12	2
10	105211664	105212420	ENSG00000138172	0	ENSG00000138172	0.231026	0	promoter	105212148	-	0.231026	CALHM2	16	111	18	35	26	32	9	26	31	20	16	11	27
10	105218567	105218861	ENSG00000185933	0	ENSG00000185933	0.0141792	0	promoter	105218645	-	0.0141792	CALHM1	3	19	7	2	6	20	9	5	6	4	5	2	14
10	105230756	105231588	ENSG00000183128	972	ENSG00000183128	972	972	distal	105238997	-	972	CALHM3	58	469	72	111	67	117	57	134	161	75	49	47	201
10	105231752	105232218	ENSG00000183128	342	ENSG00000183128	342	342	promoter	105238997	-	342	CALHM3	5	134	24	27	19	22	5	16	17	11	9	7	19
10	105236203	105236493	ENSG00000183128	0	ENSG00000183128	0.434121	0.388906	promoter	105238997	-	0.434121	CALHM3	6	54	8	14	8	23	26	7	8	5	4	15	3
10	105238924	105239307	ENSG00000183128	0	ENSG00000183128	0.0113424	0	promoter	105238997	-	0.0113424	CALHM3	19	18	4	20	12	27	12	16	20	5	4	9	28
10	105245091	105245821	ENSG00000235470	0	ENSG00000235470	0.848346	-6093	distal	105277150	-	0.848346	RP11-225H22.5	18	53	8	32	26	23	51	17	20	36	22	8	29
10	105250438	105251021	ENSG00000235470	0	ENSG00000235470	0.706854	-2714	distal	105277150	-	0.706854	RP11-225H22.5	40	10	13	3	8	42	26	10	12	10	9	14	26
10	105258614	105259061	ENSG00000235470	0	ENSG00000235470	0.4905	0.049476	promoter	105277150	-	0.4905	RP11-225H22.5	19	23	10	31	16	58	11	4	1	12	13	15	21
10	105263990	105264422	ENSG00000235470	0	ENSG00000235470	0.34824	0.104014	promoter	105277150	-	0.34824	RP11-225H22.5	8	25	2	29	15	4	18	15	17	11	12	9	53
10	105275203	105275691	ENSG00000235470	0	ENSG00000235470	0.0515216	-43	promoter	105277150	-	0.0515216	RP11-225H22.5	20	39	15	21	14	31	42	20	26	48	42	30	16
10	105302592	105302884	ENSG00000107954	0	ENSG00000107954	0.495633	-5947	distal	105352309	+	0.495633	NEURL	7	9	2	7	3	9	4	4	7	3	4	7	6
10	105302921	105303123	ENSG00000107954	0	ENSG00000107954	0.49897	-5708	distal	105352309	+	0.49897	NEURL	2	5	3	5	0	4	0	3	1	9	1	2	4
10	105314567	105314907	ENSG00000107954	0	ENSG00000107954	0.617116	-81	promoter	105352309	+	0.617116	NEURL	3	20	3	7	8	32	6	13	12	11	12	7	9
10	105343830	105344286	ENSG00000107954	0	ENSG00000107954	0.771898	6170	distal	105352309	+	0.771898	NEURL	3	0	4	2	3	2	3	8	20	13	20	1	1
10	105419677	105420451	ENSG00000107957	0	ENSG00000107957	0.0297847	0.016853	promoter	105421462	-	0.0297847	SH3PXD2A	23	111	21	5	6	5	23	30	43	56	51	16	29
10	105421285	105421707	ENSG00000107957	0	ENSG00000107957	0.00295345	0	promoter	105421462	-	0.00295345	SH3PXD2A	35	1	0	3	3	0	13	19	36	43	36	11	36
10	105428672	105428873	ENSG00000107957	0	ENSG00000107957	0.663401	-4042	distal	105561055	-	0.663401	SH3PXD2A	2	3	1	0	2	1	1	16	12	2	4	1	3
10	105437671	105438353	ENSG00000107957	0	ENSG00000107957	0.618305	0	promoter	105561055	-	0.618305	SH3PXD2A	78	161	27	86	72	74	93	57	86	49	52	39	105
10	105439388	105439553	ENSG00000107957	0	ENSG00000107957	0.609701	-1465	promoter	105561055	-	0.609701	SH3PXD2A	2	17	2	17	20	14	8	9	11	5	8	6	7
10	105445796	105446289	ENSG00000107957	0	ENSG00000107957	0.577589	0.0634526	promoter	105561055	-	0.577589	SH3PXD2A	11	25	11	13	22	11	15	8	11	10	15	13	18
10	105451555	105452474	ENSG00000107957	0	ENSG00000107957	0.548729	0.00434803	promoter	105561055	-	0.548729	SH3PXD2A	48	106	24	122	54	48	70	44	52	64	41	50	48
10	105453103	105453457	ENSG00000107957	0	ENSG00000107957	0.540972	0	promoter	105561055	-	0.540972	SH3PXD2A	9	38	6	27	14	18	18	13	14	12	13	13	10
10	105456250	105456557	ENSG00000107957	0	ENSG00000107957	0.525201	-2868	distal	105561055	-	0.525201	SH3PXD2A	34	7	9	21	14	21	29	33	34	28	26	9	23
10	105464007	105464363	ENSG00000107957	0	ENSG00000107957	0.486329	-10625	distal	105561055	-	0.486329	SH3PXD2A	9	18	5	10	8	9	2	7	12	1	3	4	8
10	105472631	105473068	ENSG00000107957	0	ENSG00000107957	0.443113	-19249	distal	105561055	-	0.443113	SH3PXD2A	13	17	9	21	15	13	26	7	10	22	17	10	19
10	105518926	105519109	ENSG00000107957	0	ENSG00000107957	0.211118	0.210196	promoter	105561055	-	0.211118	SH3PXD2A	0	0	2	4	4	1	13	4	2	3	4	1	3
10	105531881	105532688	ENSG00000107957	0	ENSG00000107957	0.146197	0.142148	promoter	105561055	-	0.146197	SH3PXD2A	25	15	6	60	23	44	40	27	47	26	21	12	38
10	105541140	105541807	ENSG00000107957	0	ENSG00000107957	0.0997985	0.0964511	promoter	105561055	-	0.0997985	SH3PXD2A	32	2	3	50	30	111	45	8	10	11	13	6	20
10	105560573	105560804	ENSG00000107957	0	ENSG00000107957	0.00241541	0.00125281	promoter	105561055	-	0.00241541	SH3PXD2A	5	1	1	8	10	5	5	5	17	6	11	5	15
10	105619097	105619254	ENSG00000107957	-3795	ENSG00000107957	-3795	-3795	distal	105615301	-	-3795	SH3PXD2A	8	5	6	8	5	13	11	9	3	6	11	3	6
10	10562763	10563177	ENSG00000270111	-58450	ENSG00000270111	-58450	-58450	distal	10504312	-	-58450	RP11-271F18.4	5	0	1	6	12	7	2	14	30	28	30	12	3
10	105647927	105648406	ENSG00000107960	0	ENSG00000107960	0.688419	-8407	distal	105659911	-	0.688419	OBFC1	12	39	14	16	10	17	30	11	18	14	28	17	10
10	105654205	105654370	ENSG00000107960	0	ENSG00000107960	0.32778	0.318244	promoter	105659911	-	0.32778	OBFC1	1	4	1	0	1	5	3	6	5	11	18	6	1
10	105655317	105655779	ENSG00000107960	0	ENSG00000107960	0.263902	0.237305	promoter	105659911	-	0.263902	OBFC1	6	42	13	12	3	11	4	18	17	11	11	9	2
10	105667863	105668509	ENSG00000107960	0	ENSG00000107960	0.281799	-7951	distal	105677888	-	0.281799	OBFC1	89	309	67	60	33	75	47	81	92	70	69	37	97
10	105677504	105678581	ENSG00000107960	0	ENSG00000107960	0.0107941	0	promoter	105677888	-	0.0107941	OBFC1	99	307	75	99	62	79	126	93	156	102	113	40	198
10	105695945	105696112	ENSG00000107960	-17981	ENSG00000107960	-17981	-17981	distal	105677963	-	-17981	OBFC1	4	6	2	1	1	0	11	1	3	2	0	2	5
10	105726545	105726765	ENSG00000065613	-193	ENSG00000065613	-193	-193	promoter	105788991	+	-193	SLK	6	27	9	15	10	11	5	7	5	10	12	10	12
10	105727648	105728070	ENSG00000065613	0	ENSG00000065613	0.0111072	0.011091	promoter	105788991	+	0.0111072	SLK	18	39	4	15	11	8	19	16	19	17	31	10	17
10	105743082	105743627	ENSG00000065613	0	ENSG00000065613	0.259914	-8509	distal	105788991	+	0.259914	SLK	9	120	22	14	5	7	13	5	10	32	27	11	14
10	105749973	105750327	ENSG00000065613	0	ENSG00000065613	0.371002	-15400	distal	105788991	+	0.371002	SLK	4	7	6	4	0	2	20	9	6	3	9	3	2
10	105849417	105849725	ENSG00000065618	-3656	ENSG00000065618	-3656	-3656	distal	105845760	-	-3656	COL17A1	0	1	3	5	7	19	8	7	8	3	10	2	3
10	105853542	105853902	ENSG00000065618	-7781	ENSG00000065618	-7781	-7781	distal	105845760	-	-7781	COL17A1	0	6	5	12	14	8	12	15	19	5	5	2	1
10	105863832	105863997	ENSG00000156384	-17818	ENSG00000156384	-17818	-17818	distal	105883121	+	-17818	SFR1	2	9	1	1	1	4	3	3	3	7	2	6	2
10	105864036	105864983	ENSG00000156384	-16832	ENSG00000156384	-16832	-16832	distal	105883121	+	-16832	SFR1	14	22	6	20	18	45	13	18	19	16	29	18	7
10	105869731	105870029	ENSG00000156384	-11786	ENSG00000156384	-11786	-11786	distal	105883121	+	-11786	SFR1	1	11	3	11	7	14	9	13	13	11	12	6	8
10	105880521	105882122	ENSG00000156384	0	ENSG00000156384	-0.412566	0	promoter	105885602	+	-0.412566	SFR1	220	487	148	223	135	245	247	206	258	271	257	100	376
10	105887233	105887613	ENSG00000156384	1089	ENSG00000156384	1089	1630	distal	105886143	+	1089	SFR1	10	1	2	15	17	3	19	3	1	7	8	10	2
10	105991921	105992472	ENSG00000197748	0	ENSG00000197748	0.00612245	0	promoter	105992098	-	0.00612245	WDR96	36	18	2	57	54	46	74	41	76	35	42	40	89
10	105996315	105996595	ENSG00000148834	0	ENSG00000148834	0.0491367	0.0490958	promoter	106019556	+	0.0491367	GSTO1	6	21	5	5	2	6	8	3	10	4	9	3	20
10	106006600	106007045	ENSG00000148834	0	ENSG00000148834	0.469929	-6876	distal	106019556	+	0.469929	GSTO1	9	15	6	6	2	7	8	21	35	26	28	2	6
10	106014385	106014585	ENSG00000148834	0	ENSG00000148834	-0.00848923	0	promoter	106027215	+	-0.00848923	GSTO1	6	19	5	12	4	10	6	9	9	5	8	4	14
10	106015012	106015618	ENSG00000148834	0	ENSG00000148834	0.00743403	0.00735234	promoter	106027162	+	0.00743403	GSTO1	15	36	13	27	13	22	21	19	25	18	21	9	16
10	106027802	106029212	ENSG00000266852	0	ENSG00000266852	3.86598	0	promoter	106028177	-	3.86598	MIR4482-1	137	479	101	181	114	134	187	127	207	163	165	58	239
10	106034379	106034572	ENSG00000065621	0	ENSG00000065621	0.179954	-76	promoter	106059169	+	0.179954	GSTO2	1	6	5	3	6	11	6	3	4	4	5	5	5
10	106034657	106034822	ENSG00000065621	0	ENSG00000065621	-0.00125568	0	promoter	106051402	+	-0.00125568	GSTO2	1	8	1	8	7	7	3	2	0	4	2	6	5
10	106044717	106044954	ENSG00000065621	0	ENSG00000065621	0.396606	-741	promoter	106059616	+	0.396606	GSTO2	2	2	1	17	17	6	4	2	3	2	3	3	5
10	106047288	106047543	ENSG00000065621	0	ENSG00000065621	0.118101	0.118027	promoter	106059176	+	0.118101	GSTO2	1	3	1	20	4	23	3	3	2	9	7	9	11
10	106051090	106051655	ENSG00000065621	0	ENSG00000065621	0.400148	-3377	distal	106059176	+	0.400148	GSTO2	28	70	17	32	29	19	30	29	21	33	38	15	44
10	106060359	106061112	ENSG00000065621	0	ENSG00000065621	0.854145	1189	distal	106064703	+	0.854145	GSTO2	111	148	34	129	87	101	174	43	70	111	108	50	217
10	106065493	106065775	ENSG00000065621	789	ENSG00000065621	789	-6123	distal	106064703	+	789	GSTO2	33	9	7	19	20	21	40	22	29	15	18	18	52
10	106068254	106068774	ENSG00000148841	3119	ENSG00000148841	3119	-3124	distal	106098162	-	3119	ITPRIP	17	75	15	20	18	23	18	25	41	28	22	12	68
10	106081722	106082641	ENSG00000148841	0	ENSG00000148841	0.656243	-485	promoter	106093663	-	0.656243	ITPRIP	38	173	40	57	41	44	32	21	37	38	39	33	145
10	106088865	106089425	ENSG00000148841	0	ENSG00000148841	0.263684	-182	promoter	106093663	-	0.263684	ITPRIP	30	20	9	44	45	129	5	29	55	93	135	37	44
10	106096920	106097177	ENSG00000148841	0	ENSG00000148841	0.0472819	0.03746	promoter	106098162	-	0.0472819	ITPRIP	11	74	16	11	3	10	4	10	17	22	12	9	39
10	106098154	106098611	ENSG00000148841	0	ENSG00000148841	0.000304553	0	promoter	106098162	-	0.000304553	ITPRIP	38	96	19	33	18	33	40	23	27	28	26	16	52
10	106099347	106099900	ENSG00000148841	-1184	ENSG00000148841	-1184	-1184	promoter	106098162	-	-1184	ITPRIP	25	122	38	47	23	55	13	40	58	39	54	36	93
10	106109310	106110175	ENSG00000231233	1173	ENSG00000231233	1173	1173	distal	106113333	-	1173	CCDC147-AS1	141	253	77	139	76	100	73	125	158	204	185	76	273
10	106111750	106112109	ENSG00000231233	0	ENSG00000231233	0.797883	0.616431	promoter	106113333	-	0.797883	CCDC147-AS1	92	145	25	41	23	59	46	49	62	68	70	35	122
10	106113152	106113619	ENSG00000231233	0	ENSG00000231233	0.0912298	0	promoter	106113333	-	0.0912298	CCDC147-AS1	92	193	37	79	61	50	101	57	81	26	37	32	158
10	10631618	10631869	ENSG00000270111	-127305	ENSG00000270111	-127305	-127305	distal	10504312	-	-127305	RP11-271F18.4	2	2	1	6	5	5	2	15	11	4	11	8	4
10	106342198	106342642	ENSG00000237761	-33217	ENSG00000237761	-33217	-33217	distal	106376731	+	-33217	RP11-127O4.2	17	1	0	27	26	29	3	6	5	8	10	4	46
10	107310314	107310691	ENSG00000207068	15790	ENSG00000207068	15790	15790	distal	107294523	+	15790	RNU6-463P	3	2	1	3	1	21	1	6	0	5	3	6	0
10	10741402	10741865	ENSG00000228997	76320	ENSG00000228997	76320	76320	distal	10818624	-	76320	RP1-186E20.1	7	0	0	4	2	2	2	22	29	15	9	2	5
10	107557084	107557595	ENSG00000229466	10937	ENSG00000229466	10937	10937	distal	107578955	-	10937	RP11-56I23.1	3	16	4	3	5	8	43	6	16	11	10	9	10
10	107567727	107568277	ENSG00000229466	255	ENSG00000229466	255	255	promoter	107578955	-	255	RP11-56I23.1	16	49	19	5	7	12	20	13	20	2	8	11	10
10	107685161	107685582	ENSG00000229466	-106205	ENSG00000229466	-106205	-106205	distal	107578955	-	-106205	RP11-56I23.1	3	11	6	1	3	3	22	4	0	2	3	6	7
10	107711926	107712201	ENSG00000229466	-132970	ENSG00000229466	-132970	-132970	distal	107578955	-	-132970	RP11-56I23.1	6	24	8	7	8	3	11	6	8	3	4	9	15
10	107734709	107734963	ENSG00000229466	-155753	ENSG00000229466	-155753	-155753	distal	107578955	-	-155753	RP11-56I23.1	11	27	8	4	5	10	20	16	20	1	3	4	4
10	107935624	107935913	ENSG00000229775	0	ENSG00000229775	0.495331	-8229	distal	107948378	+	0.495331	RP11-298H24.1	3	5	3	1	1	1	22	1	1	1	9	1	3
10	1082167	1082583	ENSG00000232656	0	ENSG00000232656	0.629772	5649	distal	1090138	+	0.629772	IDI2-AS1	19	12	3	11	16	17	49	9	8	8	13	18	8
10	10824679	10824879	ENSG00000225383	1520	ENSG00000225383	1520	-6054	distal	10836920	-	1520	SFTA1P	5	1	2	0	4	1	0	13	12	0	3	2	3
10	108384702	108384994	ENSG00000108018	0	ENSG00000108018	0.479452	0.447848	promoter	108389147	-	0.479452	SORCS1	12	16	4	6	5	10	7	5	5	6	6	7	23
10	108412201	108412443	ENSG00000108018	0	ENSG00000108018	0.871898	14398	distal	108924284	-	0.871898	SORCS1	3	0	1	1	0	8	33	3	9	3	7	5	4
10	108414961	108415683	ENSG00000108018	0	ENSG00000108018	0.867198	11158	distal	108924284	-	0.867198	SORCS1	23	55	14	0	1	11	63	5	2	3	4	5	18
10	108420804	108421379	ENSG00000108018	0	ENSG00000108018	0.85725	5462	distal	108924284	-	0.85725	SORCS1	18	55	7	3	6	11	17	12	7	2	7	2	27
10	108442068	108442227	ENSG00000108018	0	ENSG00000108018	0.821045	-7220	distal	108924284	-	0.821045	SORCS1	0	1	1	0	0	2	13	2	0	4	3	1	6
10	108623827	108624133	ENSG00000108018	0	ENSG00000108018	0.511573	-105645	distal	108924284	-	0.511573	SORCS1	6	9	3	8	7	14	7	2	6	0	6	1	36
10	108691218	108691490	ENSG00000108018	0	ENSG00000108018	0.39683	-38288	distal	108924284	-	0.39683	SORCS1	10	11	3	18	16	11	2	3	2	3	5	2	31
10	108695631	108696175	ENSG00000108018	0	ENSG00000108018	0.389316	-33603	distal	108924284	-	0.389316	SORCS1	58	42	14	41	29	38	4	7	8	5	7	13	83
10	108719305	108719584	ENSG00000108018	0	ENSG00000108018	0.349007	-10194	distal	108924284	-	0.349007	SORCS1	8	23	5	6	9	10	2	7	5	6	7	4	21
10	1089531	1089764	ENSG00000067064	0	ENSG00000067064	0.853947	-1235	promoter	1094875	-	0.853947	IDI1	1	26	6	5	5	8	3	1	4	3	3	4	4
10	10911509	10911906	ENSG00000229240	57114	ENSG00000229240	57114	64996	distal	10988765	-	57114	LINC00710	1	2	1	13	6	19	5	16	9	4	4	7	9
10	109169465	109169655	ENSG00000200079	-51662	ENSG00000200079	-51662	-51662	distal	109221427	+	-51662	RNA5SP326	10	2	1	0	1	2	1	3	9	5	6	1	2
10	109185794	109186291	ENSG00000200079	-35026	ENSG00000200079	-35026	-35026	distal	109221427	+	-35026	RNA5SP326	20	51	16	13	14	27	2	23	38	25	16	12	24
10	109201674	109202132	ENSG00000200079	-19185	ENSG00000200079	-19185	-19185	distal	109221427	+	-19185	RNA5SP326	13	1	1	6	4	1	4	8	14	10	8	1	25
10	1094564	1095835	ENSG00000067064	0	ENSG00000067064	0.0496964	0	promoter	1094875	-	0.0496964	IDI1	126	556	111	152	110	121	128	128	177	161	133	70	251
10	110118704	110118892	ENSG00000234544	62413	ENSG00000234544	62413	62413	distal	110056290	+	62413	PTGES3P5	5	1	2	12	14	11	2	2	1	7	10	2	1
10	1101873	1102431	ENSG00000047056	0	ENSG00000047056	-0.01171	0	promoter	1142566	+	-0.01171	WDR37	18	92	20	19	15	36	35	24	40	22	28	7	19
10	1102507	1102916	ENSG00000047056	0	ENSG00000047056	-0.00386393	0	promoter	1178110	+	-0.00386393	WDR37	16	44	15	12	14	29	10	13	13	21	19	5	31
10	110304212	110304660	ENSG00000203434	3072	ENSG00000203434	3072	3072	distal	110321573	-	3072	RP11-163F15.1	17	38	16	15	8	9	16	9	9	15	24	16	35
10	110609968	110610341	ENSG00000224498	648	ENSG00000224498	648	648	distal	110609319	+	648	MAPKAPK5P1	5	13	3	14	5	2	1	13	31	6	8	17	4
10	110632677	110633040	ENSG00000224498	23357	ENSG00000224498	23357	23357	distal	110609319	+	23357	MAPKAPK5P1	4	4	0	2	1	4	1	8	30	5	3	3	4
10	11155271	11155496	ENSG00000048740	0	ENSG00000048740	0.303907	-14834	distal	11373245	+	0.303907	CELF2	8	10	6	11	3	10	16	6	8	11	12	7	4
10	111612255	111612783	ENSG00000108039	11740	ENSG00000108039	11740	-16832	distal	111674833	-	11740	XPNPEP1	20	24	6	15	5	11	20	8	10	12	22	10	18
10	111643987	111644377	ENSG00000108039	0	ENSG00000108039	0.985492	0	promoter	111652342	-	0.985492	XPNPEP1	11	25	8	22	15	7	29	13	13	16	16	9	22
10	111652156	111652517	ENSG00000108039	0	ENSG00000108039	0.591074	0	promoter	111653136	-	0.591074	XPNPEP1	10	18	4	4	2	3	5	13	17	7	11	3	3
10	111662725	111663657	ENSG00000108039	0	ENSG00000108039	0.298725	0.241271	promoter	111667576	-	0.298725	XPNPEP1	37	232	67	39	22	18	113	27	41	52	55	18	13
10	111674655	111675157	ENSG00000108039	0	ENSG00000108039	0.0105685	0	promoter	111674937	-	0.0105685	XPNPEP1	33	21	9	13	17	18	52	37	75	78	86	14	65
10	111682768	111682939	ENSG00000108039	0	ENSG00000108039	0.0115685	0.00669985	promoter	111683198	-	0.0115685	XPNPEP1	4	20	4	4	7	11	3	2	2	4	6	3	8
10	111683069	111683384	ENSG00000108039	0	ENSG00000108039	0.00347054	0	promoter	111683198	-	0.00347054	XPNPEP1	15	53	7	8	5	11	20	13	16	13	13	6	28
10	111716457	111716825	ENSG00000203876	-2807	ENSG00000203876	-2807	-2807	distal	111713649	-	-2807	RP11-451M19.3	9	47	14	25	26	10	11	11	15	14	11	13	18
10	111738321	111738573	ENSG00000148700	-17552	ENSG00000148700	-17552	-17552	distal	111878366	+	-17552	ADD3	5	31	8	9	6	2	9	5	7	10	15	6	6
10	111756139	111756328	ENSG00000148700	0	ENSG00000148700	0.000106348	9.81675e-05	promoter	111878366	+	0.000106348	ADD3	2	8	0	10	3	7	0	2	3	13	18	6	1
10	111767037	111768201	ENSG00000148700	0	ENSG00000148700	-0.00891622	0	promoter	111877137	+	-0.00891622	ADD3	83	313	76	94	52	96	81	80	117	73	83	36	138
10	111768343	111768786	ENSG00000148700	0	ENSG00000148700	0.00305149	0.00304233	promoter	111877137	+	0.00305149	ADD3	19	112	31	32	12	22	35	15	21	27	25	12	31
10	111769950	111770129	ENSG00000148700	0	ENSG00000148700	0.0177775	0.0177683	promoter	111877137	+	0.0177775	ADD3	4	43	3	8	6	7	4	2	1	10	17	3	7
10	111796897	111797306	ENSG00000148700	0	ENSG00000148700	0.205057	0.205047	promoter	111877160	+	0.205057	ADD3	0	60	17	23	7	1	7	15	19	6	6	17	32
10	111818310	111818475	ENSG00000148700	0	ENSG00000148700	0.417136	-18287	distal	111877160	+	0.417136	ADD3	3	13	5	2	2	1	0	2	1	1	2	5	2
10	111827784	111828208	ENSG00000148700	0	ENSG00000148700	0.510969	-8554	distal	111877160	+	0.510969	ADD3	15	114	24	46	28	20	15	22	33	12	19	15	52
10	111829400	111829864	ENSG00000148700	0	ENSG00000148700	0.526974	-6898	distal	111877160	+	0.526974	ADD3	17	96	24	22	20	30	30	14	22	32	17	27	41
10	111836311	111837093	ENSG00000148700	0	ENSG00000148700	-0.0111909	0	promoter	111877153	+	-0.0111909	ADD3	42	293	57	58	36	63	40	47	81	95	81	43	136
10	111837383	111837576	ENSG00000148700	0	ENSG00000148700	0.0153503	0.0153256	promoter	111877153	+	0.0153503	ADD3	5	62	10	3	7	9	4	6	9	14	17	6	14
10	111841881	111842072	ENSG00000148700	0	ENSG00000148700	0.0642259	0.0642036	promoter	111883901	+	0.0642259	ADD3	1	52	11	11	6	1	1	20	14	12	13	3	9
10	111845601	111846325	ENSG00000148700	0	ENSG00000148700	0.147069	0.147047	promoter	111883901	+	0.147069	ADD3	32	187	44	45	46	3	1	64	92	6	5	3	106
10	11184766	11185073	ENSG00000048740	0	ENSG00000048740	0.398098	-21919	distal	11373245	+	0.398098	CELF2	3	2	1	12	9	0	2	17	17	2	3	14	16
10	11187369	11187798	ENSG00000048740	0	ENSG00000048740	0.406411	-19194	distal	11373245	+	0.406411	CELF2	11	45	15	22	11	15	9	9	30	18	20	12	16
10	111896879	111897266	ENSG00000148700	1555	ENSG00000148700	1555	1705	distal	111895323	+	1555	ADD3	18	46	20	22	10	27	32	14	26	17	25	16	34
10	111898039	111898391	ENSG00000226734	580	ENSG00000226734	580	580	distal	111899184	-	580	SNRPGP12	13	25	14	12	17	30	22	13	14	19	29	11	23
10	11191471	11191844	ENSG00000048740	0	ENSG00000048740	0.41951	-15148	distal	11373245	+	0.41951	CELF2	13	0	0	14	12	0	3	24	53	7	6	24	1
10	111922698	111922863	ENSG00000226734	-23513	ENSG00000226734	-23513	-23513	distal	111899184	-	-23513	SNRPGP12	5	9	0	0	1	1	1	0	1	3	2	1	2
10	11192536	11192771	ENSG00000048740	0	ENSG00000048740	0.422911	-14221	distal	11373245	+	0.422911	CELF2	10	23	7	8	9	5	6	13	15	7	6	10	7
10	111952317	111952732	ENSG00000119950	-14630	ENSG00000119950	-14630	-14630	distal	112047123	+	-14630	MXI1	6	59	12	17	12	13	8	15	5	7	3	6	4
10	111960225	111960595	ENSG00000119950	-6767	ENSG00000119950	-6767	-6767	distal	112047123	+	-6767	MXI1	13	26	4	10	2	10	2	10	5	14	8	17	19
10	111967223	111967435	ENSG00000119950	0	ENSG00000119950	-0.00175527	0	promoter	112047123	+	-0.00175527	MXI1	25	67	16	29	19	24	40	17	11	9	10	11	32
10	111969286	111969783	ENSG00000119950	0	ENSG00000119950	0.0254749	-205	promoter	112039827	+	0.0254749	MXI1	37	191	51	49	40	39	35	31	33	24	12	28	39
10	111970050	111970216	ENSG00000119950	0	ENSG00000119950	0.000799738	0.000786627	promoter	112046264	+	0.000799738	MXI1	11	74	18	24	11	24	8	8	21	10	6	6	9
10	111970644	111971248	ENSG00000119950	0	ENSG00000119950	0.00858735	0.00857424	promoter	112046264	+	0.00858735	MXI1	132	337	81	114	78	127	87	85	94	70	61	64	205
10	111981450	111982061	ENSG00000119950	0	ENSG00000119950	0.150259	-3689	distal	112046264	+	0.150259	MXI1	74	223	65	72	55	78	87	75	117	65	85	53	147
10	111985381	111985763	ENSG00000119950	0	ENSG00000119950	-0.00611439	0	promoter	112046264	+	-0.00611439	MXI1	38	88	23	27	26	41	54	17	26	37	28	19	71
10	111985865	111986645	ENSG00000119950	0	ENSG00000119950	0.000389778	0.000372831	promoter	112044850	+	0.000389778	MXI1	41	137	49	35	33	40	56	32	62	53	54	20	80
10	111987080	111987283	ENSG00000119950	0	ENSG00000119950	-0.000761931	0	promoter	112044872	+	-0.000761931	MXI1	12	23	5	25	8	9	18	14	17	8	11	6	15
10	112001160	112001808	ENSG00000119950	0	ENSG00000119950	0.239206	0.239188	promoter	112044806	+	0.239206	MXI1	18	97	18	17	4	23	22	19	39	24	28	15	36
10	112009262	112009608	ENSG00000119950	0	ENSG00000119950	0.380432	-7213	distal	112044806	+	0.380432	MXI1	17	28	6	17	9	24	13	34	44	57	29	12	77
10	112011134	112011524	ENSG00000119950	0	ENSG00000119950	0.413063	-5297	distal	112044806	+	0.413063	MXI1	23	65	17	26	13	47	13	35	46	62	53	22	67
10	112014348	112014540	ENSG00000119950	0	ENSG00000119950	0.469086	-2281	promoter	112044806	+	0.469086	MXI1	4	24	7	4	5	1	8	3	1	1	4	1	8
10	112028292	112028618	ENSG00000119950	0	ENSG00000119950	0.712144	10690	distal	112044806	+	0.712144	MXI1	4	36	6	4	4	7	7	3	3	3	3	19	12
10	112029209	112029662	ENSG00000119950	0	ENSG00000119950	0.728128	11607	distal	112044806	+	0.728128	MXI1	24	52	16	11	7	9	9	24	35	36	25	11	54
10	112039024	112039390	ENSG00000119950	0	ENSG00000119950	0.899214	21422	distal	112044806	+	0.899214	MXI1	6	14	6	7	11	4	10	8	18	11	14	15	10
10	11204991	11205472	ENSG00000048740	0	ENSG00000048740	0.462686	-1520	promoter	11373245	+	0.462686	CELF2	24	247	47	37	16	13	24	59	88	60	36	20	74
10	112064473	112065170	ENSG00000119953	0	ENSG00000119953	0.030266	0	promoter	112064696	-	0.030266	SMNDC1	46	196	52	61	50	64	88	58	78	78	77	43	102
10	112065888	112066174	ENSG00000119953	-1178	ENSG00000119953	-1178	-1178	promoter	112064709	-	-1178	SMNDC1	18	61	18	23	20	17	29	16	21	25	38	15	33
10	11206733	11207362	ENSG00000048740	0	ENSG00000048740	-0.00223566	0	promoter	11372602	+	-0.00223566	CELF2	66	185	21	62	43	62	51	71	91	65	47	51	93
10	112071095	112071683	ENSG00000119953	-6385	ENSG00000119953	-6385	-6385	distal	112064709	-	-6385	SMNDC1	15	26	12	23	7	5	29	15	11	10	20	13	22
10	112078007	112078562	ENSG00000119953	-13297	ENSG00000119953	-13297	-13297	distal	112064709	-	-13297	SMNDC1	2	3	0	23	15	18	5	20	51	13	12	12	40
10	11208031	11208447	ENSG00000048740	0	ENSG00000048740	0.00330146	0.00329535	promoter	11371055	+	0.00330146	CELF2	46	131	39	40	38	33	53	36	45	45	48	31	72
10	112084161	112084967	ENSG00000119953	-19451	ENSG00000119953	-19451	-19451	distal	112064709	-	-19451	SMNDC1	17	52	21	77	44	26	37	5	6	48	48	51	8
10	112086525	112086746	ENSG00000119953	-21815	ENSG00000119953	-21815	-21815	distal	112064709	-	-21815	SMNDC1	1	5	1	20	24	5	13	1	3	5	6	3	2
10	112095771	112096229	ENSG00000119953	-31061	ENSG00000119953	-31061	-31061	distal	112064709	-	-31061	SMNDC1	1	5	2	35	26	9	5	16	12	8	15	7	3
10	112100602	112100802	ENSG00000119953	-35892	ENSG00000119953	-35892	-35892	distal	112064709	-	-35892	SMNDC1	16	17	4	14	13	9	12	15	15	8	9	0	14
10	112104431	112104714	ENSG00000119953	-39721	ENSG00000119953	-39721	-39721	distal	112064709	-	-39721	SMNDC1	0	27	3	19	11	7	6	19	9	6	1	18	35
10	112113167	112114266	ENSG00000119953	-48457	ENSG00000119953	-48457	-48457	distal	112064709	-	-48457	SMNDC1	38	132	32	124	111	77	195	182	275	37	59	55	104
10	112114984	112115245	ENSG00000119953	-50274	ENSG00000119953	-50274	-50274	distal	112064709	-	-50274	SMNDC1	52	130	20	50	22	37	41	15	24	14	16	24	51
10	112115961	112117098	ENSG00000119953	-51251	ENSG00000119953	-51251	-51251	distal	112064709	-	-51251	SMNDC1	206	660	144	197	161	204	218	158	219	194	198	111	316
10	112117174	112117422	ENSG00000119953	-52464	ENSG00000119953	-52464	-52464	distal	112064709	-	-52464	SMNDC1	29	60	12	25	25	27	31	19	24	12	29	18	38
10	112118080	112118313	ENSG00000119953	-53370	ENSG00000119953	-53370	-53370	distal	112064709	-	-53370	SMNDC1	8	160	18	10	7	10	6	15	13	4	8	12	14
10	112121648	112122092	ENSG00000119953	-56938	ENSG00000119953	-56938	-56938	distal	112064709	-	-56938	SMNDC1	17	48	11	15	7	43	19	27	39	32	56	13	24
10	112124372	112124860	ENSG00000119953	-59662	ENSG00000119953	-59662	-59662	distal	112064709	-	-59662	SMNDC1	15	11	4	11	6	40	49	21	23	3	9	4	4
10	112127757	112128228	ENSG00000273143	60369	ENSG00000273143	60369	-63047	distal	112255945	-	60369	RP11-525A16.4	5	63	15	21	12	29	66	16	21	22	23	18	11
10	112147718	112148480	ENSG00000273143	40117	ENSG00000273143	40117	-45518	distal	112255945	-	40117	RP11-525A16.4	13	346	63	17	10	17	42	36	35	39	28	10	54
10	11214932	11215248	ENSG00000048740	0	ENSG00000048740	0.0454929	-1592	promoter	11371055	+	0.0454929	CELF2	6	10	5	27	24	19	5	33	50	17	7	31	3
10	112155381	112156042	ENSG00000273143	32555	ENSG00000273143	32555	-37956	distal	112255945	-	32555	RP11-525A16.4	54	246	63	59	45	80	87	86	104	65	69	46	117
10	112167704	112168301	ENSG00000273143	20296	ENSG00000273143	20296	-25697	distal	112255945	-	20296	RP11-525A16.4	5	100	11	32	15	25	4	29	38	10	10	19	8
10	112169466	112169746	ENSG00000273143	18851	ENSG00000273143	18851	-24252	distal	112255945	-	18851	RP11-525A16.4	7	73	10	7	6	4	1	18	17	6	8	10	11
10	112174048	112174837	ENSG00000273143	13760	ENSG00000273143	13760	-19161	distal	112255945	-	13760	RP11-525A16.4	175	508	149	194	161	144	155	196	301	144	128	97	351
10	11217917	11218219	ENSG00000048740	0	ENSG00000048740	0.0637426	-4577	distal	11371055	+	0.0637426	CELF2	40	90	19	15	12	19	19	35	54	41	38	27	19
10	112180291	112180727	ENSG00000273143	7870	ENSG00000273143	7870	-13271	distal	112255945	-	7870	RP11-525A16.4	12	77	32	9	5	11	4	21	19	47	32	12	6
10	112183556	112183766	ENSG00000273143	4831	ENSG00000273143	4831	-10232	distal	112255945	-	4831	RP11-525A16.4	5	46	6	9	5	10	3	5	11	9	8	7	12
10	112185735	112186043	ENSG00000273143	2554	ENSG00000273143	2554	-7955	distal	112255945	-	2554	RP11-525A16.4	4	24	9	36	36	6	35	35	34	8	9	14	8
10	112201396	112202001	ENSG00000273143	0	ENSG00000273143	0.809969	7252	distal	112255945	-	0.809969	RP11-525A16.4	6	112	22	34	26	24	47	21	31	46	43	32	82
10	11220402	11221028	ENSG00000048740	0	ENSG00000048740	0.0789355	-7062	distal	11371055	+	0.0789355	CELF2	59	203	53	67	38	51	53	75	119	56	65	26	111
10	11221710	11222558	ENSG00000048740	0	ENSG00000048740	0.0869323	-8370	distal	11371055	+	0.0869323	CELF2	41	186	28	38	44	25	32	63	102	22	31	26	31
10	112217945	112218532	ENSG00000273143	0	ENSG00000273143	0.564242	6946	distal	112255945	-	0.564242	RP11-525A16.4	10	87	10	23	14	19	7	32	37	10	12	11	14
10	112220172	112221146	ENSG00000273143	0	ENSG00000273143	0.531174	9173	distal	112255945	-	0.531174	RP11-525A16.4	40	140	22	114	66	130	106	104	114	53	38	46	102
10	112252186	112252467	ENSG00000273143	0	ENSG00000273143	0.178957	0.0516281	promoter	112255962	-	0.178957	RP11-525A16.4	23	22	6	7	3	3	10	8	9	12	14	2	4
10	112255892	112256356	ENSG00000273143	0	ENSG00000273143	0.00331754	0	promoter	112255962	-	0.00331754	RP11-525A16.4	3	4	2	42	14	8	21	27	47	3	11	28	0
10	112257374	112257720	ENSG00000138166	0	ENSG00000138166	-0.0161973	0	promoter	112271302	+	-0.0161973	DUSP5	24	83	25	20	14	14	31	16	33	32	45	17	65
10	112261070	112261284	ENSG00000138166	0	ENSG00000138166	0.253466	-1220	promoter	112271302	+	0.253466	DUSP5	16	94	17	32	13	25	30	31	38	12	16	25	30
10	112262758	112263163	ENSG00000138166	0	ENSG00000138166	0.0328999	0.0327698	promoter	112270195	+	0.0328999	DUSP5	52	108	31	52	29	56	11	34	48	57	53	40	62
10	112263586	112264314	ENSG00000138166	0	ENSG00000138166	0.140572	0.140442	promoter	112270195	+	0.140572	DUSP5	97	203	63	87	62	94	133	103	111	89	111	36	251
10	112272216	112272994	ENSG00000138166	913	ENSG00000138166	913	2020	distal	112271302	+	913	DUSP5	41	392	64	125	76	43	104	93	143	90	77	29	52
10	11228394	11228648	ENSG00000048740	0	ENSG00000048740	0.127797	-15054	distal	11371055	+	0.127797	CELF2	5	14	4	3	7	5	1	13	12	7	9	4	11
10	112288747	112289076	ENSG00000138166	17444	ENSG00000138166	17444	20796	distal	112271302	+	17444	DUSP5	14	106	32	33	19	8	31	30	33	18	17	11	25
10	112295712	112296598	ENSG00000233518	13274	ENSG00000233518	13274	13274	distal	112310612	-	13274	RP11-73H14.1	64	546	147	131	81	55	86	146	236	57	54	37	111
10	112299821	112300188	ENSG00000233518	9684	ENSG00000233518	9684	9684	distal	112310612	-	9684	RP11-73H14.1	6	161	43	12	6	3	10	7	4	5	13	7	2
10	112307007	112307182	ENSG00000233518	2690	ENSG00000233518	2690	2690	distal	112310612	-	2690	RP11-73H14.1	12	14	10	11	6	11	17	3	10	15	16	6	16
10	112316780	112317217	ENSG00000233518	-6167	ENSG00000233518	-6167	-6167	distal	112310612	-	-6167	RP11-73H14.1	16	10	2	15	8	12	30	8	12	20	17	5	23
10	112326855	112327878	ENSG00000108055	0	ENSG00000108055	-0.016078	0	promoter	112364394	+	-0.016078	SMC3	122	379	98	131	84	136	125	141	199	205	143	56	241
10	112327970	112328303	ENSG00000108055	0	ENSG00000108055	-0.00840705	0	promoter	112341764	+	-0.00840705	SMC3	6	63	10	18	7	22	12	19	17	23	16	11	19
10	112360161	112360514	ENSG00000108055	0	ENSG00000108055	0.885424	23941	distal	112364394	+	0.885424	SMC3	8	10	3	11	6	5	18	8	6	1	8	2	3
10	112371969	112372168	ENSG00000108055	7574	ENSG00000108055	7574	21420	distal	112364394	+	7574	SMC3	2	4	4	7	4	4	3	2	2	18	10	1	3
10	112373057	112373342	ENSG00000108055	8662	ENSG00000108055	8662	20246	distal	112364394	+	8662	SMC3	2	6	5	16	12	18	38	2	7	15	20	10	8
10	11239119	11239689	ENSG00000048740	0	ENSG00000048740	0.193368	-25779	distal	11371055	+	0.193368	CELF2	23	58	9	39	19	14	13	50	89	50	41	42	32
10	112401079	112401283	ENSG00000223302	1152	ENSG00000223302	1152	1152	distal	112402543	-	1152	Y_RNA	3	17	7	8	9	8	10	1	6	5	8	3	4
10	112411276	112411622	ENSG00000203867	0	ENSG00000203867	0.0365045	0.0364993	promoter	112599227	+	0.0365045	RBM20	3	30	7	3	1	5	3	10	3	7	8	5	7
10	112431742	112432498	ENSG00000203867	0	ENSG00000203867	0.14142	0.141414	promoter	112599227	+	0.14142	RBM20	48	164	20	69	42	37	68	39	47	51	48	22	64
10	112477861	112478150	ENSG00000203867	0	ENSG00000203867	0.37784	-38063	distal	112599227	+	0.37784	RBM20	5	16	5	8	7	3	0	2	0	7	14	9	2
10	112483341	112483724	ENSG00000203867	0	ENSG00000203867	0.405932	-32489	distal	112599227	+	0.405932	RBM20	3	104	17	9	6	18	17	0	4	5	5	8	13
10	112483932	112484542	ENSG00000203867	0	ENSG00000203867	0.408962	-31671	distal	112599227	+	0.408962	RBM20	14	161	32	15	11	14	4	13	13	23	25	9	12
10	112525075	112525471	ENSG00000203867	0	ENSG00000203867	0.619874	4074	distal	112599227	+	0.619874	RBM20	6	11	7	8	8	11	11	12	27	13	8	6	18
10	112525777	112526116	ENSG00000203867	0	ENSG00000203867	0.623472	4776	distal	112599227	+	0.623472	RBM20	1	47	9	2	4	4	4	4	5	1	4	3	10
10	11252663	11252877	ENSG00000048740	0	ENSG00000048740	0.276173	-39323	distal	11371055	+	0.276173	CELF2	2	0	3	13	9	2	19	14	19	15	13	7	4
10	112533759	112534339	ENSG00000203867	0	ENSG00000203867	0.664391	12758	distal	112599227	+	0.664391	RBM20	79	156	55	93	95	65	80	52	131	76	92	39	241
10	112562358	112563182	ENSG00000203867	0	ENSG00000203867	0.810998	-20163	distal	112599227	+	0.810998	RBM20	10	124	27	28	28	16	14	62	70	26	31	62	45
10	112563691	112564051	ENSG00000203867	0	ENSG00000203867	0.817831	-19294	distal	112599227	+	0.817831	RBM20	9	12	10	17	15	15	19	15	16	16	19	17	19
10	112578721	112578957	ENSG00000203867	0	ENSG00000203867	0.89488	-4388	distal	112599227	+	0.89488	RBM20	5	17	1	12	2	16	8	15	26	16	12	7	13
10	112583304	112583522	ENSG00000203867	0	ENSG00000203867	-0.00529968	0	promoter	112591271	+	-0.00529968	RBM20	13	12	4	7	7	14	1	13	14	21	12	8	9
10	112601540	112602094	ENSG00000203867	2312	ENSG00000203867	2312	5523	distal	112599227	+	2312	RBM20	71	131	27	96	73	98	106	91	100	42	34	73	161
10	11260246	11260758	ENSG00000048740	0	ENSG00000048740	0.322534	-46906	distal	11371055	+	0.322534	CELF2	2	2	3	12	13	5	55	9	19	82	69	6	2
10	112602741	112603226	ENSG00000203867	3513	ENSG00000203867	3513	6724	distal	112599227	+	3513	RBM20	31	187	44	60	41	80	52	53	54	25	39	35	106
10	112611940	112612767	ENSG00000203867	12712	ENSG00000203867	12712	-16733	distal	112599227	+	12712	RBM20	37	51	13	38	29	67	23	64	97	58	39	25	44
10	112620337	112620924	ENSG00000232470	-8576	ENSG00000232470	-8576	-8576	distal	112631352	+	-8576	RP11-313D6.3	20	216	20	19	15	20	3	16	29	18	32	18	70
10	112624365	112624796	ENSG00000232470	-4704	ENSG00000232470	-4704	-4704	distal	112631352	+	-4704	RP11-313D6.3	45	252	57	31	34	33	17	41	88	24	23	24	106
10	112625456	112625825	ENSG00000232470	-3675	ENSG00000232470	-3675	-3675	distal	112631352	+	-3675	RP11-313D6.3	23	114	28	19	13	25	14	19	38	40	27	15	32
10	112631340	112631806	ENSG00000203497	0	ENSG00000203497	0.275264	0	promoter	112631991	-	0.275264	PDCD4-AS1	28	144	24	38	23	28	43	22	54	41	49	20	65
10	112632424	112632829	ENSG00000150593	0	ENSG00000150593	0.0447479	-432	promoter	112647602	+	0.0447479	PDCD4	23	73	14	28	24	29	23	20	41	52	55	12	56
10	112641759	112641922	ENSG00000150593	0	ENSG00000150593	0.224896	0.224763	promoter	112647556	+	0.224896	PDCD4	6	8	2	5	5	5	7	9	11	18	19	4	25
10	112653392	112653657	ENSG00000150593	0	ENSG00000150593	0.370792	0.370668	promoter	112658476	+	0.370792	PDCD4	8	27	4	18	12	11	36	18	18	15	23	10	26
10	112661956	112662329	ENSG00000214413	0	ENSG00000214413	0.896537	0.503715	promoter	112678940	-	0.896537	BBIP1	25	28	4	20	5	4	21	31	31	45	45	15	37
10	112678159	112679430	ENSG00000214413	0	ENSG00000214413	0.63228	0	promoter	112678919	-	0.63228	BBIP1	230	671	137	190	156	182	290	196	330	217	248	138	394
10	11267906	11268818	ENSG00000048740	0	ENSG00000048740	0.369366	-54566	distal	11371055	+	0.369366	CELF2	41	27	6	114	94	15	54	89	125	94	77	44	37
10	112708735	112709243	ENSG00000108061	0	ENSG00000108061	0.647811	-11743	distal	112724487	+	0.647811	SHOC2	14	38	8	12	4	9	12	14	30	32	20	11	24
10	11274139	11274466	ENSG00000048740	0	ENSG00000048740	0.407474	-60799	distal	11371055	+	0.407474	CELF2	0	1	6	14	12	2	4	19	21	13	7	12	3
10	112743329	112743536	ENSG00000108061	0	ENSG00000108061	0.887458	-5147	distal	112745680	+	0.887458	SHOC2	1	15	2	2	3	2	1	1	2	4	1	3	0
10	112752847	112753406	ENSG00000108061	0	ENSG00000108061	0.57847	4075	distal	112773424	+	0.57847	SHOC2	2	116	17	7	6	1	13	11	16	5	4	2	22
10	112790194	112790356	ENSG00000108061	16768	ENSG00000108061	16768	41422	distal	112773425	+	16768	SHOC2	11	5	4	0	4	0	5	1	3	2	7	5	6
10	11279513	11279977	ENSG00000048740	0	ENSG00000048740	0.440329	-66173	distal	11371055	+	0.440329	CELF2	32	150	26	28	19	30	23	23	41	9	9	6	30
10	112835976	112836138	ENSG00000150594	-651	ENSG00000150594	-651	-651	promoter	112840658	+	-651	ADRA2A	15	2	1	14	10	10	17	3	6	8	5	5	11
10	11284300	11285076	ENSG00000048740	0	ENSG00000048740	0.469596	-70960	distal	11371055	+	0.469596	CELF2	122	307	59	98	57	134	124	87	149	117	83	51	201
10	112853674	112854024	ENSG00000213247	-10689	ENSG00000213247	-10689	-10689	distal	112865006	+	-10689	RP11-479A21.1	9	3	5	3	7	3	2	14	20	3	4	7	7
10	11287238	11287894	ENSG00000048740	0	ENSG00000048740	0.487558	-73898	distal	11371055	+	0.487558	CELF2	38	183	53	80	65	66	54	62	80	85	79	39	62
10	112888463	112888888	ENSG00000213247	23456	ENSG00000213247	23456	23456	distal	112865006	+	23456	RP11-479A21.1	8	6	2	11	7	31	6	2	4	5	6	4	17
10	11288847	11289220	ENSG00000048740	0	ENSG00000048740	0.497396	69576	distal	11371055	+	0.497396	CELF2	3	10	1	26	9	7	3	29	63	21	17	13	20
10	112937326	112937791	ENSG00000213247	72319	ENSG00000213247	72319	72319	distal	112865006	+	72319	RP11-479A21.1	6	1	1	13	10	33	7	6	4	4	4	5	22
10	11295059	11295311	ENSG00000048740	0	ENSG00000048740	0.535375	63485	distal	11371055	+	0.535375	CELF2	0	7	4	19	13	4	15	1	0	8	4	7	2
10	11298089	11298442	ENSG00000048740	0	ENSG00000048740	0.553899	60354	distal	11371055	+	0.553899	CELF2	11	4	5	12	3	4	7	18	25	15	18	23	17
10	11303146	11303953	ENSG00000048740	0	ENSG00000048740	0.584817	54843	distal	11371055	+	0.584817	CELF2	22	30	13	22	25	14	75	50	69	42	39	16	14
10	113057409	113057837	ENSG00000237618	-24698	ENSG00000237618	-24698	-24698	distal	113083155	+	-24698	BTBD7P2	4	3	1	2	8	20	1	3	3	4	2	5	21
10	113098348	113098945	ENSG00000227851	10751	ENSG00000227851	10751	10751	distal	113111861	-	10751	RP11-381K7.1	17	33	5	38	35	59	73	53	61	26	10	39	145
10	113104635	113104797	ENSG00000227851	4899	ENSG00000227851	4899	4899	distal	113111861	-	4899	RP11-381K7.1	1	0	0	3	1	1	14	2	4	4	3	3	5
10	113120074	113120372	ENSG00000227851	-8212	ENSG00000227851	-8212	-8212	distal	113111861	-	-8212	RP11-381K7.1	7	7	5	9	10	9	25	7	10	4	16	13	45
10	11312466	11312830	ENSG00000048740	0	ENSG00000048740	0.641798	45966	distal	11371055	+	0.641798	CELF2	25	70	16	17	16	12	34	15	30	5	9	11	27
10	11325858	11326424	ENSG00000048740	0	ENSG00000048740	0.723674	32372	distal	11371055	+	0.723674	CELF2	12	3	17	5	11	10	5	29	28	9	32	25	14
10	113358225	113358507	ENSG00000230809	-99525	ENSG00000230809	-99525	-99525	distal	113258699	-	-99525	RP11-309P22.1	11	9	3	13	11	8	15	5	8	15	9	7	16
10	113632308	113632724	ENSG00000119927	276899	ENSG00000119927	276899	280903	distal	113943521	-	276899	GPAM	15	3	2	12	12	42	2	1	6	4	5	4	35
10	11387760	11388105	ENSG00000048740	9085	ENSG00000048740	9085	-25912	distal	11378674	+	9085	CELF2	2	2	2	7	6	1	1	3	18	7	10	2	19
10	113899883	113900316	ENSG00000119927	9307	ENSG00000119927	9307	13311	distal	113943521	-	9307	GPAM	24	82	19	30	28	16	82	20	36	26	40	16	49
10	113942959	113943851	ENSG00000119927	0	ENSG00000119927	0.921729	0	promoter	113974154	-	0.921729	GPAM	49	135	29	52	28	55	85	36	58	49	46	24	83
10	114074671	114074978	ENSG00000243316	0	ENSG00000243316	0.783225	12432	distal	114098857	-	0.783225	GUCY2GP	7	15	7	9	2	9	18	9	5	6	12	5	11
10	114129085	114129525	ENSG00000197142	-4250	ENSG00000197142	-4250	-4250	distal	114188134	+	-4250	ACSL5	2	122	24	2	7	3	1	11	7	5	4	7	13
10	114135514	114136386	ENSG00000197142	0	ENSG00000197142	-0.00848968	0	promoter	114188138	+	-0.00848968	ACSL5	64	287	70	56	49	66	64	72	88	50	57	32	128
10	114206487	114207366	ENSG00000023041	0	ENSG00000023041	0.0106324	0	promoter	114206659	-	0.0106324	ZDHHC6	79	223	54	80	64	82	132	61	108	93	86	33	97
10	114225168	114225731	ENSG00000151532	0	ENSG00000151532	0.225505	0.225493	promoter	114287164	+	0.225505	VTI1A	24	103	23	5	2	2	27	15	17	13	13	11	41
10	114231733	114232070	ENSG00000151532	0	ENSG00000151532	0.307519	0.307507	promoter	114287164	+	0.307519	VTI1A	15	20	9	16	11	4	23	4	8	20	18	7	14
10	114286016	114286344	ENSG00000151532	0	ENSG00000151532	0.985658	22046	distal	114287164	+	0.985658	VTI1A	2	22	6	8	1	0	3	3	6	5	7	7	8
10	114291970	114292450	ENSG00000151532	0	ENSG00000151532	0.933042	15940	distal	114298060	+	0.933042	VTI1A	20	118	33	16	15	1	27	10	24	41	41	13	33
10	114295194	114295708	ENSG00000151532	0	ENSG00000151532	0.968489	12682	distal	114298060	+	0.968489	VTI1A	7	72	7	6	5	4	4	10	5	26	21	6	10
10	114306316	114306604	ENSG00000151532	0	ENSG00000151532	0.267304	1786	distal	114578503	+	0.267304	VTI1A	10	9	5	2	3	0	1	7	16	15	15	12	8
10	11466540	11466889	ENSG00000148429	29055	ENSG00000148429	29055	-104692	distal	11653753	-	29055	USP6NL	6	2	3	5	6	7	4	4	12	4	3	4	7
10	114709786	114710087	ENSG00000148737	0	ENSG00000148737	-0.00102563	0	promoter	114927437	+	-0.00102563	TCF7L2	3	17	7	6	12	8	13	10	10	12	9	8	4
10	11471637	11471843	ENSG00000148429	24101	ENSG00000148429	24101	30665	distal	11653753	-	24101	USP6NL	3	0	2	7	13	2	0	3	3	2	3	1	4
10	114741263	114741732	ENSG00000148737	0	ENSG00000148737	0.160651	-5502	distal	114901075	+	0.160651	TCF7L2	24	10	2	33	17	19	7	23	27	22	19	20	83
10	11482350	11482836	ENSG00000148429	13108	ENSG00000148429	13108	19672	distal	11653753	-	13108	USP6NL	4	2	1	3	4	4	3	14	23	14	5	6	4
10	11490338	11491029	ENSG00000148429	4915	ENSG00000148429	4915	11479	distal	11653753	-	4915	USP6NL	24	33	10	45	26	36	28	35	72	28	21	42	37
10	114929832	114930178	ENSG00000148737	2394	ENSG00000148737	2394	4391	distal	114927437	+	2394	TCF7L2	12	8	3	4	7	10	5	3	11	11	15	7	39
10	114992965	114993229	ENSG00000148737	65527	ENSG00000148737	65527	67524	distal	114927437	+	65527	TCF7L2	5	7	5	1	6	4	2	7	7	5	7	10	17
10	11514169	11514477	ENSG00000148429	0	ENSG00000148429	0.897021	0.83322	promoter	11615736	-	0.897021	USP6NL	5	9	9	9	5	6	9	12	19	13	12	5	12
10	115141729	115142210	ENSG00000238380	28485	ENSG00000238380	28485	28485	distal	115113243	+	28485	RNU7-165P	11	95	15	6	8	4	9	21	31	13	10	9	15
10	115144979	115145190	ENSG00000238380	31735	ENSG00000238380	31735	31735	distal	115113243	+	31735	RNU7-165P	16	41	8	8	2	2	15	7	6	6	6	10	12
10	115280989	115281191	ENSG00000148702	-29404	ENSG00000148702	-29404	-29404	distal	115349361	+	-29404	HABP2	8	1	2	3	3	3	12	1	6	4	6	6	10
10	115323134	115323554	ENSG00000148702	0	ENSG00000148702	0.340067	-3688	distal	115343128	+	0.340067	HABP2	15	40	8	7	11	12	21	15	11	19	20	20	31
10	11541523	11542222	ENSG00000148429	0	ENSG00000148429	0.655436	0.44661	promoter	11615736	-	0.655436	USP6NL	41	10	5	43	34	32	6	59	95	14	10	24	47
10	115426518	115426876	ENSG00000197893	-2631	ENSG00000197893	-2631	-2631	distal	115423886	-	-2631	NRAP	14	27	6	3	1	2	3	8	15	9	4	3	19
10	115439117	115439867	ENSG00000165806	0	ENSG00000165806	-0.01142	0	promoter	115490662	+	-0.01142	CASP7	99	391	79	88	50	59	100	70	96	58	50	47	151
10	115440256	115440932	ENSG00000165806	0	ENSG00000165806	0.0109295	0.0109099	promoter	115490662	+	0.0109295	CASP7	126	416	95	97	67	82	178	79	113	103	101	54	172
10	115441571	115442013	ENSG00000165806	0	ENSG00000165806	0.0367325	0.0367129	promoter	115490662	+	0.0367325	CASP7	54	236	63	27	19	29	45	55	74	55	49	18	57
10	115448782	115449105	ENSG00000165806	0	ENSG00000165806	0.178227	0.178208	promoter	115490662	+	0.178227	CASP7	9	35	4	4	0	0	6	5	9	4	14	3	10
10	115464448	115464944	ENSG00000165806	0	ENSG00000165806	0.485627	-4198	distal	115490662	+	0.485627	CASP7	18	18	3	3	10	10	47	7	6	14	3	13	7
10	11547494	11547965	ENSG00000148429	0	ENSG00000148429	0.602701	0.366585	promoter	11615736	-	0.602701	USP6NL	2	2	0	21	16	5	3	19	27	1	3	9	3
10	115492392	115492566	ENSG00000165806	1729	ENSG00000165806	1729	3129	distal	115490662	+	1729	CASP7	2	0	1	0	1	2	3	2	4	2	3	2	18
10	115559354	115559592	ENSG00000148735	16165	ENSG00000148735	16165	-20625	distal	115543188	+	16165	PLEKHS1	7	13	3	9	10	5	11	7	10	7	14	7	13
10	11557565	11557937	ENSG00000148429	0	ENSG00000148429	0.513756	0.227632	promoter	11615736	-	0.513756	USP6NL	10	19	16	26	13	18	21	19	20	19	24	16	11
10	11558292	11558701	ENSG00000148429	0	ENSG00000148429	0.507335	0.216986	promoter	11615736	-	0.507335	USP6NL	13	38	13	21	17	20	23	36	34	12	11	26	28
10	11559373	11559574	ENSG00000148429	0	ENSG00000148429	0.497788	0.204821	promoter	11615736	-	0.497788	USP6NL	3	2	1	13	8	10	10	9	15	5	8	11	8
10	115605830	115606231	ENSG00000198924	0	ENSG00000198924	0.422916	0.393733	promoter	115614142	-	0.422916	DCLRE1A	8	40	13	6	3	14	13	10	5	5	3	5	3
10	115611400	115611582	ENSG00000198924	0	ENSG00000198924	0.139514	0.117495	promoter	115614142	-	0.139514	DCLRE1A	3	43	4	6	6	1	9	6	5	7	8	0	3
10	1156118	1156354	ENSG00000047056	0	ENSG00000047056	0.707988	-13392	distal	1178110	+	0.707988	WDR37	7	8	2	4	9	7	15	9	11	7	6	15	4
10	115613815	115615221	ENSG00000198924	0	ENSG00000198924	0.258888	0	promoter	115614099	-	0.258888	DCLRE1A	46	191	40	71	41	80	84	66	84	73	62	33	109
10	115639524	115639797	ENSG00000196865	0	ENSG00000196865	0.401452	20912	distal	115676953	+	0.401452	NHLRC2	9	33	7	5	5	2	16	8	16	3	4	8	1
10	115650629	115650794	ENSG00000196865	0	ENSG00000196865	0.579038	-23735	distal	115676953	+	0.579038	NHLRC2	3	10	1	2	0	0	4	3	1	2	2	4	1
10	115682864	115683109	ENSG00000196865	5910	ENSG00000196865	5910	5914	distal	115676953	+	5910	NHLRC2	3	7	4	1	4	2	9	9	9	7	7	3	20
10	11569888	11570072	ENSG00000148429	0	ENSG00000148429	0.404921	0.0585383	promoter	11615736	-	0.404921	USP6NL	7	12	1	4	2	5	8	6	13	9	7	7	5
10	11570114	11570355	ENSG00000148429	0	ENSG00000148429	0.402925	0.0545949	promoter	11615736	-	0.402925	USP6NL	3	11	2	14	4	5	3	8	6	4	2	13	2
10	115707440	115707814	ENSG00000196865	30486	ENSG00000196865	30486	30490	distal	115676953	+	30486	NHLRC2	4	49	9	1	7	1	3	5	2	3	8	0	3
10	115719209	115719402	ENSG00000196865	42255	ENSG00000196865	42255	42259	distal	115676953	+	42255	NHLRC2	7	6	2	5	5	1	4	35	29	5	3	1	1
10	115720224	115720869	ENSG00000196865	43270	ENSG00000196865	43270	43274	distal	115676953	+	43270	NHLRC2	6	86	19	11	18	19	3	65	98	36	37	5	8
10	115721156	115721678	ENSG00000196865	44202	ENSG00000196865	44202	44206	distal	115676953	+	44202	NHLRC2	4	71	22	9	14	4	54	17	28	6	7	1	14
10	115725569	115725868	ENSG00000196865	48615	ENSG00000196865	48615	48619	distal	115676953	+	48615	NHLRC2	8	38	7	9	2	3	7	16	27	16	21	11	20
10	115742239	115743259	ENSG00000043591	-60546	ENSG00000043591	-60546	-60546	distal	115806667	+	-60546	ADRB1	26	169	29	24	12	35	95	52	70	43	44	34	101
10	11577298	11577723	ENSG00000148429	0	ENSG00000148429	0.339477	-3023	distal	11615736	-	0.339477	USP6NL	3	46	14	17	5	5	2	14	19	7	4	17	2
10	115784626	115785447	ENSG00000043591	-18358	ENSG00000043591	-18358	-18358	distal	115806667	+	-18358	ADRB1	59	194	42	19	15	6	7	30	52	33	41	24	49
10	115794558	115795122	ENSG00000043591	-8683	ENSG00000043591	-8683	-8683	distal	115806667	+	-8683	ADRB1	2	20	4	1	6	3	5	7	10	18	15	6	4
10	115802826	115803125	ENSG00000043591	-680	ENSG00000043591	-680	-680	promoter	115806667	+	-680	ADRB1	8	37	5	1	0	2	6	4	4	10	13	6	7
10	115803377	115803626	ENSG00000043591	-179	ENSG00000043591	-179	-179	promoter	115806667	+	-179	ADRB1	3	47	6	1	0	0	2	1	2	4	4	1	5
10	115808162	115808337	ENSG00000043591	1494	ENSG00000043591	1494	1494	distal	115806667	+	1494	ADRB1	5	21	6	0	1	1	1	4	1	4	3	3	2
10	11581207	11581761	ENSG00000148429	0	ENSG00000148429	0.304954	-6932	distal	11615736	-	0.304954	USP6NL	28	47	14	67	47	13	11	86	111	11	6	42	7
10	115824085	115824276	ENSG00000043591	17417	ENSG00000043591	17417	17417	distal	115806667	+	17417	ADRB1	1	8	3	0	3	1	14	0	0	2	3	7	0
10	115855772	115856086	ENSG00000253066	-15086	ENSG00000253066	-15086	-15086	distal	115871276	+	-15086	RNU6-709P	1	25	5	2	0	1	23	3	6	11	8	2	9
10	115861099	115861289	ENSG00000253066	-9883	ENSG00000253066	-9883	-9883	distal	115871276	+	-9883	RNU6-709P	4	6	1	1	2	2	2	5	10	7	5	3	5
10	115863183	115863334	ENSG00000253066	-7838	ENSG00000253066	-7838	-7838	distal	115871276	+	-7838	RNU6-709P	1	14	0	4	2	3	11	2	8	12	10	6	14
10	115890936	115891202	ENSG00000165813	0	ENSG00000165813	0.858614	0	promoter	115891853	-	0.858614	C10orf118	5	17	5	2	4	0	0	3	1	8	6	3	2
10	115933677	115934790	ENSG00000238742	0	ENSG00000238742	3.52703	0	promoter	115933938	-	3.52703	MIR2110	141	481	107	172	113	127	204	117	206	151	143	67	250
10	11594085	11594542	ENSG00000148429	0	ENSG00000148429	0.191218	-19810	distal	11615736	-	0.191218	USP6NL	38	115	38	45	40	33	36	47	83	23	25	35	16
10	11595979	11596516	ENSG00000148429	0	ENSG00000148429	0.17449	8669	distal	11615736	-	0.17449	USP6NL	36	100	19	39	32	22	15	38	71	29	26	25	40
10	11602344	11602696	ENSG00000148429	0	ENSG00000148429	0.118276	2489	distal	11615736	-	0.118276	USP6NL	15	23	5	21	12	7	6	15	22	20	15	17	11
10	116063749	116063927	ENSG00000169129	0	ENSG00000169129	0.247563	0.208794	promoter	116064892	-	0.247563	AFAP1L2	10	9	5	4	6	3	19	5	6	11	21	16	15
10	1161394	1161963	ENSG00000047056	0	ENSG00000047056	0.778043	-7783	distal	1178110	+	0.778043	WDR37	12	71	14	6	2	24	48	31	52	32	23	17	48
10	11615485	11615982	ENSG00000148429	0	ENSG00000148429	0.80313	0	promoter	11653665	-	0.80313	USP6NL	8	39	11	35	18	7	8	29	55	22	20	19	6
10	11620764	11621012	ENSG00000148429	0	ENSG00000148429	0.692084	-4923	distal	11653665	-	0.692084	USP6NL	2	17	3	2	1	4	6	6	7	4	4	6	5
10	116231099	116231453	ENSG00000099204	0	ENSG00000099204	0.738352	-3074	distal	116286677	-	0.738352	ABLIM1	13	29	12	10	13	16	28	4	7	13	17	12	17
10	116247322	116247487	ENSG00000099204	0	ENSG00000099204	0.52283	0.00696313	promoter	116286677	-	0.52283	ABLIM1	2	12	2	0	0	2	0	2	1	3	4	5	4
10	116256984	116257152	ENSG00000099204	0	ENSG00000099204	0.394471	4603	distal	116286677	-	0.394471	ABLIM1	16	16	3	7	5	4	3	3	3	14	15	15	17
10	116258518	116259772	ENSG00000099204	0	ENSG00000099204	0.374092	1983	distal	116286677	-	0.374092	ABLIM1	27	211	25	24	24	3	7	2	5	109	99	29	20
10	116267291	116267649	ENSG00000099204	0	ENSG00000099204	0.257543	-5184	distal	116286677	-	0.257543	ABLIM1	9	38	4	5	4	0	1	4	2	8	12	15	8
10	116286014	116286987	ENSG00000099204	0	ENSG00000099204	0.00880794	0	promoter	116286677	-	0.00880794	ABLIM1	106	342	66	63	48	37	77	35	52	133	121	81	116
10	116308443	116308610	ENSG00000099204	0	ENSG00000099204	0.957463	-21752	distal	116335296	-	0.957463	ABLIM1	2	11	2	1	1	1	4	2	0	2	4	9	4
10	11637218	11637613	ENSG00000148429	0	ENSG00000148429	0.345969	-15690	distal	11653665	-	0.345969	USP6NL	12	2	2	10	11	15	3	36	59	7	6	8	4
10	116375191	116375636	ENSG00000099204	0	ENSG00000099204	0.192864	-4714	distal	116418057	-	0.192864	ABLIM1	8	6	4	10	8	3	4	9	12	35	40	14	23
10	11644957	11645245	ENSG00000148429	0	ENSG00000148429	0.183176	-8058	distal	11653665	-	0.183176	USP6NL	14	31	6	31	13	18	2	19	35	16	10	15	6
10	11649951	11650169	ENSG00000148429	0	ENSG00000148429	0.0781253	-3134	distal	11653665	-	0.0781253	USP6NL	6	41	10	11	3	4	1	5	19	11	8	8	3
10	11650434	11650801	ENSG00000148429	0	ENSG00000148429	0.0679652	-2502	distal	11653665	-	0.0679652	USP6NL	14	16	6	16	17	26	6	19	60	16	13	24	11
10	11651706	11651929	ENSG00000148429	0	ENSG00000148429	0.0412083	-1374	promoter	11653665	-	0.0412083	USP6NL	16	26	5	20	20	10	1	36	48	11	11	12	8
10	11654572	11654766	ENSG00000271360	345	ENSG00000271360	345	-818	promoter	11654226	+	345	RP11-138I18.1	3	19	4	6	10	18	14	31	43	11	12	6	4
10	116546266	116546556	ENSG00000228484	6603	ENSG00000228484	6603	6603	distal	116539662	+	6603	RP11-106M7.1	10	12	3	1	5	4	22	6	6	11	12	5	6
10	116570740	116570992	ENSG00000215760	0	ENSG00000215760	0.894708	0.89415	promoter	116570929	+	0.894708	TAF9BP2	5	29	4	1	2	1	3	3	2	0	2	3	0
10	116581209	116581374	ENSG00000151553	-128	ENSG00000151553	-128	-128	promoter	116624472	+	-128	FAM160B1	11	18	2	13	8	7	14	9	6	6	9	2	15
10	116582172	116582772	ENSG00000151553	0	ENSG00000151553	0.0549808	0.0548953	promoter	116593224	+	0.0549808	FAM160B1	10	85	27	29	24	20	21	27	39	29	35	23	32
10	116589872	116590208	ENSG00000151553	0	ENSG00000151553	0.713382	0.713296	promoter	116593224	+	0.713382	FAM160B1	6	21	6	23	6	4	19	11	13	15	12	17	1
10	116616317	116616812	ENSG00000151553	0	ENSG00000151553	0.44583	-3737	distal	116659591	+	0.44583	FAM160B1	4	2	4	7	3	46	37	5	7	38	35	12	10
10	116636814	116637113	ENSG00000151553	0	ENSG00000151553	0.708316	13140	distal	116659591	+	0.708316	FAM160B1	5	10	4	5	5	8	13	9	2	18	18	6	7
10	116639417	116639684	ENSG00000151553	0	ENSG00000151553	0.74165	15743	distal	116659591	+	0.74165	FAM160B1	7	11	2	5	7	3	23	6	4	9	17	7	14
10	116653155	116653458	ENSG00000151553	0	ENSG00000151553	0.91758	-7022	distal	116659591	+	0.91758	FAM160B1	6	1	0	3	4	16	25	3	2	2	1	3	5
10	11666904	11667465	ENSG00000271360	12677	ENSG00000271360	12677	-13150	distal	11654226	+	12677	RP11-138I18.1	28	29	7	27	24	22	0	44	74	9	11	23	23
10	116685658	116685951	ENSG00000165832	-12000	ENSG00000165832	-12000	-12000	distal	116737430	+	-12000	TRUB1	3	14	9	6	7	8	10	14	27	5	11	6	3
10	116697685	116698518	ENSG00000165832	0	ENSG00000165832	-0.0212825	0	promoter	116719759	+	-0.0212825	TRUB1	38	224	46	61	48	73	102	59	85	84	74	37	139
10	116716294	116716548	ENSG00000165832	0	ENSG00000165832	0.839687	12670	distal	116719759	+	0.839687	TRUB1	6	33	8	0	2	6	2	7	11	4	3	7	13
10	116726807	116727130	ENSG00000165832	0	ENSG00000165832	0.730913	2088	distal	116737430	+	0.730913	TRUB1	1	17	2	0	1	1	0	6	5	2	6	3	1
10	11674029	11674623	ENSG00000271360	19802	ENSG00000271360	19802	-20275	distal	11654226	+	19802	RP11-138I18.1	20	65	17	36	26	40	41	44	66	33	26	17	43
10	116761086	116761304	ENSG00000236799	4733	ENSG00000236799	4733	4733	distal	116756352	+	4733	RP11-383C6.2	11	1	0	0	2	3	4	7	13	10	5	7	6
10	11680142	11680507	ENSG00000271360	25915	ENSG00000271360	25915	-26388	distal	11654226	+	25915	RP11-138I18.1	4	2	3	20	12	3	2	8	3	5	3	1	5
10	116878230	116878407	ENSG00000107518	0	ENSG00000107518	0.0290556	0.0290544	promoter	117708503	+	0.0290556	ATRNL1	7	2	2	2	1	5	12	1	3	10	9	8	12
10	11688417	11688732	ENSG00000271046	-32941	ENSG00000271046	-32941	-32941	distal	11722513	+	-32941	RP11-138I18.2	3	19	4	6	9	16	1	5	15	6	7	13	5
10	116885326	116885625	ENSG00000107518	0	ENSG00000107518	0.0373539	0.0373527	promoter	117708503	+	0.0373539	ATRNL1	5	6	1	1	2	1	11	3	16	16	15	4	7
10	116979095	116979394	ENSG00000107518	0	ENSG00000107518	0.977178	0.977158	promoter	116980218	+	0.977178	ATRNL1	2	1	2	0	2	3	2	1	5	17	25	1	0
10	11705969	11706677	ENSG00000271046	-14996	ENSG00000271046	-14996	-14996	distal	11722513	+	-14996	RP11-138I18.2	75	127	23	101	60	102	15	106	156	16	17	46	21
10	11715926	11716119	ENSG00000271046	-5554	ENSG00000271046	-5554	-5554	distal	11722513	+	-5554	RP11-138I18.2	8	9	1	23	14	18	2	16	19	1	1	12	5
10	11719970	11720521	ENSG00000271046	-1152	ENSG00000271046	-1152	-1152	promoter	11722513	+	-1152	RP11-138I18.2	43	46	14	83	71	63	47	92	146	50	51	59	105
10	11726711	11727562	ENSG00000271046	4197	ENSG00000271046	4197	4197	distal	11722513	+	4197	RP11-138I18.2	102	121	27	94	44	101	54	127	125	79	66	44	58
10	117335259	117335433	ENSG00000107518	0	ENSG00000107518	0.830033	0.830026	promoter	117357492	+	0.830033	ATRNL1	1	13	2	2	0	2	1	0	9	5	9	2	3
10	11740925	11741244	ENSG00000271046	18411	ENSG00000271046	18411	18411	distal	11722513	+	18411	RP11-138I18.2	1	11	4	10	11	4	1	14	10	2	10	6	6
10	117425140	117425509	ENSG00000107518	0	ENSG00000107518	0.565375	153843	distal	117704697	+	0.565375	ATRNL1	5	3	0	3	4	10	2	3	5	31	34	4	2
10	11752626	11753140	ENSG00000271046	30112	ENSG00000271046	30112	30112	distal	11722513	+	30112	RP11-138I18.2	42	64	21	37	29	35	43	43	69	56	51	29	111
10	11759759	11760452	ENSG00000134463	-23912	ENSG00000134463	-23912	-23912	distal	11806069	+	-23912	ECHDC3	46	100	26	29	21	14	20	51	57	23	31	26	71
10	117638854	117639531	ENSG00000107518	0	ENSG00000107518	0.897634	-29330	distal	117704697	+	0.897634	ATRNL1	2	3	1	45	40	13	4	27	44	100	98	25	2
10	11767132	11767447	ENSG00000134463	-16917	ENSG00000134463	-16917	-16917	distal	11806069	+	-16917	ECHDC3	9	6	4	5	5	14	7	16	25	11	7	18	5
10	117692577	117693017	ENSG00000107518	0	ENSG00000107518	0.666002	0.665974	promoter	117704470	+	0.666002	ATRNL1	4	2	1	35	32	3	3	3	0	6	5	6	3
10	117715843	117716110	ENSG00000107518	7339	ENSG00000107518	7339	11372	distal	117708503	+	7339	ATRNL1	2	2	1	7	3	7	0	6	13	1	6	4	1
10	117723156	117723783	ENSG00000107518	14652	ENSG00000107518	14652	18685	distal	117708503	+	14652	ATRNL1	6	2	2	52	44	48	4	23	28	45	51	10	3
10	11784020	11784297	ENSG00000134463	-67	ENSG00000134463	-67	-67	promoter	11806069	+	-67	ECHDC3	9	13	4	12	6	1	13	16	29	24	14	5	19
10	11784380	11784619	ENSG00000134463	0	ENSG00000134463	-0.00494861	0	promoter	11797580	+	-0.00494861	ECHDC3	7	19	6	5	1	1	3	4	7	5	8	3	19
10	11799658	11800340	ENSG00000134463	0	ENSG00000134463	0.645932	1928	distal	11805350	+	0.645932	ECHDC3	17	43	15	32	21	21	21	15	36	13	22	29	17
10	11824767	11825305	ENSG00000134463	18697	ENSG00000134463	18697	27037	distal	11806069	+	18697	ECHDC3	15	24	11	21	11	11	28	25	31	37	32	18	45
10	118502638	118503006	ENSG00000165868	-552	ENSG00000165868	-552	-552	promoter	118502085	-	-552	HSPA12A	33	0	2	23	15	1	41	11	9	11	11	3	4
10	118556590	118556829	ENSG00000225302	35682	ENSG00000225302	35682	45817	distal	118609212	-	35682	RP11-539I5.1	17	2	0	3	4	4	12	6	5	7	8	8	5
10	118609043	118609416	ENSG00000225302	0	ENSG00000225302	0.0441978	0	promoter	118609716	-	0.0441978	RP11-539I5.1	49	0	0	5	2	2	1	2	3	0	3	19	1
10	11861839	11862077	ENSG00000148426	-3260	ENSG00000148426	-3260	-3260	distal	11908775	+	-3260	PROSER2	10	9	3	7	10	2	10	7	7	16	18	5	10
10	118706754	118706938	ENSG00000187164	0	ENSG00000187164	0.792592	6621	distal	118886097	-	0.792592	KIAA1598	2	0	3	4	6	7	16	5	2	2	6	2	1
10	118934319	118934822	ENSG00000234474	-5748	ENSG00000234474	-5748	-5748	distal	118928570	-	-5748	RP11-501J20.2	38	38	9	26	24	30	61	11	12	24	33	28	36
10	118935385	118935675	ENSG00000234474	-6814	ENSG00000234474	-6814	-6814	distal	118928570	-	-6814	RP11-501J20.2	20	14	5	8	11	9	28	5	7	19	17	9	19
10	118976241	118976392	ENSG00000186795	6430	ENSG00000186795	6430	6430	distal	118969810	+	6430	KCNK18	12	8	2	4	1	5	13	4	5	5	6	2	11
10	119044368	119044783	ENSG00000165650	0	ENSG00000165650	1.00741	0.967723	promoter	119078489	-	1.00741	PDZD8	3	0	2	1	3	0	22	3	3	2	3	1	2
10	11905391	11906102	ENSG00000225778	0	ENSG00000225778	0.651377	-5540	distal	11916794	-	0.651377	PROSER2-AS1	26	30	11	33	15	14	30	59	63	58	43	29	44
10	119086779	119086995	ENSG00000165650	0	ENSG00000165650	0.560093	-8289	distal	119133992	-	0.560093	PDZD8	2	14	2	1	1	2	0	2	1	4	3	4	4
10	119101721	119102096	ENSG00000165650	0	ENSG00000165650	0.382834	-15770	distal	119133992	-	0.382834	PDZD8	12	42	15	3	1	4	5	6	9	21	11	8	17
10	119110429	119110912	ENSG00000165650	0	ENSG00000165650	0.27953	-6954	distal	119133992	-	0.27953	PDZD8	5	12	3	4	6	0	4	6	11	32	27	18	16
10	11912890	11913079	ENSG00000225778	0	ENSG00000225778	0.223009	15	promoter	11916794	-	0.223009	PROSER2-AS1	3	1	0	0	0	1	2	1	6	12	8	2	2
10	119133501	119133809	ENSG00000165650	0	ENSG00000165650	0.00582478	0.00215908	promoter	119133992	-	0.00582478	PDZD8	10	48	15	26	10	9	17	4	19	21	10	8	19
10	119134047	119134341	ENSG00000165650	0	ENSG00000165650	0.00980227	-54	promoter	119134978	-	0.00980227	PDZD8	13	34	4	11	1	12	10	3	2	5	9	5	10
10	119134926	119135491	ENSG00000165650	0	ENSG00000165650	0.000547495	0	promoter	119134978	-	0.000547495	PDZD8	34	104	24	37	13	36	56	19	38	45	24	18	71
10	119202432	119202674	ENSG00000258114	0	ENSG00000258114	0.271782	0.271767	promoter	119249930	+	0.271782	CTA-109P11.4	23	5	2	5	8	5	4	3	4	6	7	13	4
10	119256106	119256377	ENSG00000229847	0	ENSG00000229847	0.882158	-1906	promoter	119301845	-	0.882158	EMX2OS	16	9	5	19	8	5	20	15	8	22	23	14	21
10	119306991	119307180	ENSG00000170370	0	ENSG00000170370	0.655466	-2411	promoter	119308365	+	0.655466	EMX2	2	1	1	0	3	3	0	3	1	14	4	1	7
10	119412645	119413045	ENSG00000235198	-80676	ENSG00000235198	-80676	-80676	distal	119331968	-	-80676	CTA-109P11.1	69	1	2	10	12	3	6	8	14	12	24	4	113
10	119423306	119423549	ENSG00000234952	-71274	ENSG00000234952	-71274	-71274	distal	119495918	+	-71274	RP11-328K15.1	4	0	1	0	3	4	2	4	0	6	3	2	35
10	119506311	119506764	ENSG00000234952	10392	ENSG00000234952	10392	10392	distal	119495918	+	10392	RP11-328K15.1	21	1	0	1	1	1	3	2	2	40	54	0	28
10	119522119	119522766	ENSG00000234952	26200	ENSG00000234952	26200	26200	distal	119495918	+	26200	RP11-328K15.1	18	1	2	2	4	2	4	2	3	74	75	9	55
10	119564253	119564523	ENSG00000263041	20890	ENSG00000263041	20890	20890	distal	119590029	-	20890	RP11-355F22.1	5	0	1	5	5	1	3	3	2	19	25	3	7
10	119620464	119620630	ENSG00000263041	-30434	ENSG00000263041	-30434	-30434	distal	119590029	-	-30434	RP11-355F22.1	4	1	0	2	1	0	12	2	2	5	5	3	3
10	119656075	119656336	ENSG00000263041	-66045	ENSG00000263041	-66045	-66045	distal	119590029	-	-66045	RP11-355F22.1	4	2	4	0	1	0	0	1	2	1	3	1	17
10	119788182	119788481	ENSG00000107560	0	ENSG00000107560	0.470658	-10766	distal	119805674	-	0.470658	RAB11FIP2	3	24	3	2	1	14	10	0	5	10	9	7	20
10	119805492	119805901	ENSG00000107560	0	ENSG00000107560	0.00489708	0	promoter	119805674	-	0.00489708	RAB11FIP2	21	70	19	17	11	21	28	17	15	21	10	15	26
10	119806096	119806744	ENSG00000107560	0	ENSG00000107560	0.000431789	0	promoter	119806114	-	0.000431789	RAB11FIP2	35	119	23	50	22	36	42	36	50	29	34	20	71
10	119821334	119821635	ENSG00000177640	0	ENSG00000177640	0.077171	0.0771647	promoter	119967332	+	0.077171	CASC2	4	32	8	1	1	1	1	7	3	3	2	2	2
10	11991269	11991466	ENSG00000151461	0	ENSG00000151461	0.762221	25981	distal	12085023	-	0.762221	UPF2	3	12	3	3	5	2	0	7	9	7	8	6	5
10	120018958	120019136	ENSG00000238276	0	ENSG00000238276	0.682861	0.682823	promoter	120027222	+	0.682861	RP11-245J24.1	6	3	1	7	2	1	15	5	2	3	4	2	8
10	120091810	120092242	ENSG00000165669	0	ENSG00000165669	0.317413	-5948	distal	120101832	-	0.317413	FAM204A	12	31	7	20	22	17	7	17	14	12	17	22	9
10	120101378	120102285	ENSG00000165669	0	ENSG00000165669	0.0732984	0	promoter	120101840	-	0.0732984	FAM204A	71	219	59	71	52	85	112	54	81	71	70	29	140
10	120183329	120183626	ENSG00000232139	58713	ENSG00000232139	58713	58713	distal	120124615	+	58713	LINC00867	9	1	1	11	7	8	26	7	4	8	11	10	25
10	12028756	12028984	ENSG00000151461	0	ENSG00000151461	0.457452	0.422101	promoter	12085023	-	0.457452	UPF2	4	17	6	4	10	8	8	3	7	8	11	5	5
10	120303644	120303829	ENSG00000266281	-1776	ENSG00000266281	-1776	-1776	promoter	120305676	+	-1776	AL356865.2	8	1	1	3	5	4	21	3	7	4	6	9	4
10	120327872	120328207	ENSG00000234309	-4175	ENSG00000234309	-4175	-4175	distal	120333132	+	-4175	SLC25A18P1	11	15	6	11	9	9	29	5	9	8	20	7	17
10	120457990	120458362	ENSG00000151893	0	ENSG00000151893	0.717519	-6912	distal	120467025	-	0.717519	CACUL1	31	36	10	14	23	4	21	4	8	20	18	7	34
10	120482319	120482557	ENSG00000151893	0	ENSG00000151893	0.527275	0.0639435	promoter	120514758	-	0.527275	CACUL1	27	28	10	3	15	9	12	6	6	7	2	9	13
10	120489118	120489428	ENSG00000151893	0	ENSG00000151893	0.982966	-3220	distal	120513989	-	0.982966	CACUL1	23	52	11	8	9	5	7	4	12	29	27	10	18
10	120492238	120492869	ENSG00000151893	0	ENSG00000151893	0.859655	-6340	distal	120513989	-	0.859655	CACUL1	9	195	41	0	1	1	5	5	3	5	9	4	20
10	120513749	120513923	ENSG00000151893	0	ENSG00000151893	0.00948542	0.00256897	promoter	120513989	-	0.00948542	CACUL1	10	35	8	8	3	11	11	7	5	15	15	6	16
10	120514311	120515055	ENSG00000151893	0	ENSG00000151893	0.00726569	0	promoter	120514758	-	0.00726569	CACUL1	112	344	85	96	66	70	124	72	112	118	133	50	194
10	1205445	1205833	ENSG00000229205	0	ENSG00000229205	-0.250629	0	promoter	1206937	+	-0.250629	LINC00200	1	1	0	2	0	0	72	2	0	0	4	4	2
10	120559431	120559622	ENSG00000251836	-13955	ENSG00000251836	-13955	-13955	distal	120545475	-	-13955	U3	3	0	3	3	2	2	13	2	3	8	1	3	1
10	120599673	120600039	ENSG00000236058	31521	ENSG00000236058	31521	31521	distal	120631989	-	31521	RP11-215A21.2	16	2	2	2	5	2	38	5	1	4	6	2	10
10	120610089	120610297	ENSG00000236058	21263	ENSG00000236058	21263	21263	distal	120631989	-	21263	RP11-215A21.2	13	2	1	7	2	3	16	3	0	3	3	7	7
10	120628181	120628496	ENSG00000236058	3064	ENSG00000236058	3064	3064	distal	120631989	-	3064	RP11-215A21.2	2	0	1	3	2	3	22	1	1	6	1	2	3
10	12064368	12064871	ENSG00000151461	0	ENSG00000151461	0.167925	0.112397	promoter	12085023	-	0.167925	UPF2	9	50	16	7	7	8	5	2	6	9	11	5	12
10	120661092	120661370	ENSG00000236058	-28977	ENSG00000236058	-28977	-28977	distal	120632114	-	-28977	RP11-215A21.2	1	0	1	1	0	2	31	1	0	4	3	3	0
10	12069533	12070063	ENSG00000151461	0	ENSG00000151461	0.125934	0.0675901	promoter	12085023	-	0.125934	UPF2	4	104	27	3	4	1	8	2	6	5	2	4	6
10	120699168	120699367	ENSG00000213574	-6360	ENSG00000213574	-6360	-6360	distal	120692807	-	-6360	LDHAP5	2	8	0	6	2	1	9	1	1	7	8	2	22
10	120715522	120715722	ENSG00000213574	-22714	ENSG00000213574	-22714	-22714	distal	120692807	-	-22714	LDHAP5	5	0	0	1	2	2	32	1	1	6	5	2	3
10	120718668	120718916	ENSG00000213574	-25860	ENSG00000213574	-25860	-25860	distal	120692807	-	-25860	LDHAP5	6	1	1	4	1	2	26	2	0	4	2	2	2
10	120727572	120728007	ENSG00000213574	-34764	ENSG00000213574	-34764	-34764	distal	120692807	-	-34764	LDHAP5	7	2	1	3	7	1	78	2	1	1	4	2	2
10	120742844	120743092	ENSG00000229272	19955	ENSG00000229272	19955	19955	distal	120763396	-	19955	RP11-498J9.2	2	7	2	3	5	0	22	2	2	0	2	2	1
10	120746779	120747095	ENSG00000229272	15952	ENSG00000229272	15952	15952	distal	120763396	-	15952	RP11-498J9.2	4	58	13	4	9	11	18	1	2	5	6	9	19
10	120755222	120755620	ENSG00000229272	7427	ENSG00000229272	7427	7427	distal	120763396	-	7427	RP11-498J9.2	2	2	4	2	1	1	36	1	2	4	4	1	4
10	120760381	120760620	ENSG00000229272	2427	ENSG00000229272	2427	2427	distal	120763396	-	2427	RP11-498J9.2	3	4	1	0	1	0	36	0	1	1	3	1	4
10	120766338	120766795	ENSG00000215925	926	ENSG00000215925	926	926	distal	120765411	+	926	AL157788.1	4	9	4	1	5	1	100	4	3	12	7	3	3
10	120788656	120789033	ENSG00000188613	-194	ENSG00000188613	-194	-194	promoter	120793854	+	-194	NANOS1	12	45	8	23	16	24	31	14	35	8	16	17	30
10	120790312	120790489	ENSG00000188613	0	ENSG00000188613	0.33785	0.336947	promoter	120791045	+	0.33785	NANOS1	3	21	8	11	7	5	19	4	5	9	16	12	7
10	12083652	12083989	ENSG00000151461	0	ENSG00000151461	0.18703	0.00686415	promoter	12085169	-	0.18703	UPF2	29	93	17	38	19	43	51	40	63	51	52	16	44
10	120839376	120839924	ENSG00000107581	0	ENSG00000107581	0.0146447	0.00236999	promoter	120840031	-	0.0146447	EIF3A	43	116	24	34	11	26	44	15	34	39	39	15	30
10	120840149	120840875	ENSG00000107581	0	ENSG00000107581	0.00363359	0	promoter	120840316	-	0.00363359	EIF3A	45	183	46	63	38	55	58	56	89	76	83	28	85
10	12084664	12085702	ENSG00000151461	0	ENSG00000151461	0.0622611	0	promoter	12085169	-	0.0622611	UPF2	117	284	82	120	71	135	127	137	150	149	130	61	215
10	120850038	120850288	ENSG00000271343	-2363	ENSG00000271343	-2363	-2363	promoter	120852853	+	-2363	RP11-435O11.5	5	18	4	4	3	3	10	4	5	1	11	6	11
10	120850440	120850925	ENSG00000271343	-1726	ENSG00000271343	-1726	-1726	promoter	120852853	+	-1726	RP11-435O11.5	22	83	20	7	6	1	47	16	18	20	28	5	21
10	12085807	12086302	ENSG00000151461	-637	ENSG00000151461	-637	-637	promoter	12085169	-	-637	UPF2	94	319	80	87	81	71	89	79	137	69	77	31	121
10	120863359	120863818	ENSG00000119979	0	ENSG00000119979	-0.00816252	0	promoter	120896707	+	-0.00816252	FAM45A	16	52	10	16	11	12	14	13	12	8	21	5	29
10	120879135	120880428	ENSG00000119979	0	ENSG00000119979	-0.045184	0	promoter	120896692	+	-0.045184	FAM45A	144	330	110	50	43	42	165	95	165	152	120	39	149
10	120891057	120891733	ENSG00000119979	0	ENSG00000119979	0.36284	0.362664	promoter	120894692	+	0.36284	FAM45A	15	60	17	17	16	13	33	26	42	43	46	7	45
10	12090629	12090931	ENSG00000151461	-5459	ENSG00000151461	-5459	-5459	distal	12085169	-	-5459	UPF2	10	14	6	4	8	5	9	7	9	30	17	2	23
10	120924602	120925228	ENSG00000183605	0	ENSG00000183605	0.0574114	0	promoter	120925054	-	0.0574114	SFXN4	43	177	32	44	28	33	41	37	48	34	27	16	91
10	120925280	120925651	ENSG00000183605	-100	ENSG00000183605	-100	-100	promoter	120925179	-	-100	SFXN4	25	60	6	29	8	20	17	13	27	21	22	7	23
10	120937876	120938638	ENSG00000165672	0	ENSG00000165672	0.0421649	0	promoter	120938345	-	0.0421649	PRDX3	60	201	33	74	40	67	74	61	74	69	71	21	86
10	12095491	12096185	ENSG00000151461	-10321	ENSG00000151461	-10321	-10321	distal	12085169	-	-10321	UPF2	38	101	21	22	23	35	53	62	73	65	72	38	63
10	120958953	120959239	ENSG00000198873	-7861	ENSG00000198873	-7861	-7861	distal	121215131	+	-7861	GRK5	7	2	1	5	2	2	25	4	3	10	15	5	10
10	120966806	120967164	ENSG00000198873	0	ENSG00000198873	-0.00118937	0	promoter	121215131	+	-0.00118937	GRK5	20	76	24	16	18	28	29	14	27	21	24	13	50
10	120971559	120971914	ENSG00000198873	0	ENSG00000198873	0.0179736	-454	promoter	121215131	+	0.0179736	GRK5	11	82	23	3	6	13	12	15	14	24	20	11	31
10	120972187	120972395	ENSG00000242853	0	ENSG00000242853	-0.634146	0	promoter	120972656	+	-0.634146	RN7SL749P	6	34	14	5	5	5	5	3	6	4	7	3	3
10	120994913	120995098	ENSG00000198873	0	ENSG00000198873	0.112132	22256	distal	121215131	+	0.112132	GRK5	3	13	3	1	6	1	1	5	5	8	7	14	4
10	121010078	121010268	ENSG00000198873	0	ENSG00000198873	0.173273	37421	distal	121215131	+	0.173273	GRK5	1	1	1	2	4	2	4	5	9	5	7	2	1
10	121028380	121028940	ENSG00000198873	0	ENSG00000198873	0.247063	55723	distal	121215131	+	0.247063	GRK5	33	138	37	82	70	9	24	22	59	88	65	32	20
10	121030512	121031358	ENSG00000198873	0	ENSG00000198873	0.255659	57855	distal	121215131	+	0.255659	GRK5	23	148	27	79	68	35	22	86	86	50	54	63	20
10	121043351	121043743	ENSG00000198873	0	ENSG00000198873	0.307422	50262	distal	121215131	+	0.307422	GRK5	15	94	16	14	8	3	5	5	4	27	30	7	19
10	121065403	121066756	ENSG00000198873	0	ENSG00000198873	0.396331	27249	distal	121215131	+	0.396331	GRK5	270	785	214	271	172	225	336	292	375	314	260	136	426
10	121072902	121073720	ENSG00000198873	0	ENSG00000198873	0.426565	20285	distal	121215131	+	0.426565	GRK5	113	375	62	117	85	10	72	87	124	22	11	34	161
10	121074723	121075374	ENSG00000198873	0	ENSG00000198873	0.433907	18631	distal	121215131	+	0.433907	GRK5	8	66	17	83	67	12	28	20	22	8	15	34	14
10	121092618	121093024	ENSG00000198873	0	ENSG00000198873	0.506056	981	distal	121215131	+	0.506056	GRK5	7	28	5	5	11	1	32	6	6	10	11	3	12
10	121100985	121101289	ENSG00000198873	0	ENSG00000198873	0.53979	-5290	distal	121215131	+	0.53979	GRK5	13	31	3	9	5	2	9	8	12	4	12	6	11
10	12110495	12111168	ENSG00000181192	0	ENSG00000181192	-0.0233432	0	promoter	12133642	+	-0.0233432	DHTKD1	117	429	81	70	58	91	91	75	130	93	119	33	181
10	121119765	121120146	ENSG00000198873	0	ENSG00000198873	0.615506	-17337	distal	121215131	+	0.615506	GRK5	12	16	5	10	12	4	8	4	2	6	9	5	13
10	121128484	121129310	ENSG00000198873	0	ENSG00000198873	0.650659	-8173	distal	121215131	+	0.650659	GRK5	31	119	19	49	21	16	41	34	40	47	35	25	33
10	121142752	121143374	ENSG00000198873	0	ENSG00000198873	0.0626361	0.0626231	promoter	121214630	+	0.0626361	GRK5	31	148	20	9	7	4	16	14	25	46	32	8	5
10	121155987	121156406	ENSG00000198873	0	ENSG00000198873	0.235234	0.235221	promoter	121214630	+	0.235234	GRK5	6	39	11	6	3	1	8	0	3	25	12	4	2
10	12115870	12116394	ENSG00000181192	0	ENSG00000181192	0.214289	0.214245	promoter	12133642	+	0.214289	DHTKD1	2	32	7	0	2	0	1	20	36	4	1	2	25
10	12117064	12117468	ENSG00000181192	0	ENSG00000181192	0.267076	0.267032	promoter	12133642	+	0.267076	DHTKD1	13	51	14	10	14	1	9	11	17	6	12	13	31
10	121176466	121176682	ENSG00000198873	0	ENSG00000198873	0.502302	-35277	distal	121214630	+	0.502302	GRK5	8	11	2	3	3	5	3	11	2	7	9	4	8
10	121204595	121205164	ENSG00000198873	0	ENSG00000198873	0.869133	-6795	distal	121214630	+	0.869133	GRK5	7	26	9	24	11	6	14	7	6	9	14	8	13
10	121220991	121221197	ENSG00000198873	5859	ENSG00000198873	5859	8239	distal	121215131	+	5859	GRK5	1	18	2	9	10	3	5	4	6	9	10	10	3
10	121226239	121226472	ENSG00000198873	11107	ENSG00000198873	11107	13487	distal	121215131	+	11107	GRK5	4	17	3	5	4	2	12	5	7	14	12	1	5
10	121237692	121237925	ENSG00000148908	21414	ENSG00000148908	21414	24940	distal	121296045	-	21414	RGS10	4	25	6	8	2	5	6	4	1	6	9	3	6
10	121249039	121249457	ENSG00000148908	9882	ENSG00000148908	9882	25577	distal	121296045	-	9882	RGS10	4	51	11	12	19	10	24	11	11	4	3	6	7
10	121254083	121254305	ENSG00000148908	5034	ENSG00000148908	5034	20729	distal	121296045	-	5034	RGS10	7	23	7	4	6	4	18	5	7	7	1	6	9
10	121276013	121276433	ENSG00000148908	0	ENSG00000148908	0.368763	-12	promoter	121285606	-	0.368763	RGS10	27	12	5	30	13	9	6	11	19	26	30	14	16
10	121277329	121277736	ENSG00000148908	0	ENSG00000148908	0.318175	-1328	promoter	121285606	-	0.318175	RGS10	8	2	3	19	11	3	12	9	11	28	19	10	4
10	121356040	121357012	ENSG00000151923	0	ENSG00000151923	0.0122859	0	promoter	121356144	-	0.0122859	TIAL1	138	531	130	163	115	131	193	130	179	151	101	63	253
10	121376557	121376706	ENSG00000234569	-3873	ENSG00000234569	-3873	-3873	distal	121381392	+	-3873	RP11-179H18.4	1	2	0	1	2	2	14	5	1	0	1	1	22
10	121410396	121411083	ENSG00000151929	0	ENSG00000151929	-0.018375	0	promoter	121437331	+	-0.018375	BAG3	36	96	33	28	29	40	30	23	23	43	38	21	43
10	121411903	121412068	ENSG00000151929	0	ENSG00000151929	0.0386026	0.0385648	promoter	121437331	+	0.0386026	BAG3	13	20	6	4	0	7	11	2	2	14	13	3	15
10	121417862	121418050	ENSG00000151929	0	ENSG00000151929	0.0865801	0.0865303	promoter	121436219	+	0.0865801	BAG3	4	5	4	7	2	4	27	7	8	11	9	3	2
10	121423374	121423818	ENSG00000151929	0	ENSG00000151929	0.36085	0.3608	promoter	121436219	+	0.36085	BAG3	10	97	28	4	8	10	28	4	9	21	22	2	23
10	121427077	121427615	ENSG00000151929	0	ENSG00000151929	0.545106	0.545056	promoter	121436219	+	0.545106	BAG3	4	60	15	1	2	4	52	3	0	6	6	4	2
10	121441777	121442065	ENSG00000232823	573	ENSG00000232823	573	573	distal	121443335	-	573	RP11-179H18.7	14	4	0	2	3	3	28	8	14	10	12	7	13
10	121446029	121446605	ENSG00000232823	-2693	ENSG00000232823	-2693	-2693	distal	121443335	-	-2693	RP11-179H18.7	37	132	40	39	37	51	73	68	107	82	82	22	64
10	121452777	121453028	ENSG00000232823	-9441	ENSG00000232823	-9441	-9441	distal	121443335	-	-9441	RP11-179H18.7	1	18	6	3	3	0	2	3	2	3	1	1	1
10	121459953	121460297	ENSG00000232823	-16617	ENSG00000232823	-16617	-16617	distal	121443335	-	-16617	RP11-179H18.7	40	75	23	27	25	33	5	21	48	45	56	30	57
10	121463561	121464415	ENSG00000232823	-20225	ENSG00000232823	-20225	-20225	distal	121443335	-	-20225	RP11-179H18.7	91	302	72	104	77	111	97	61	80	157	96	71	178
10	121464864	121465268	ENSG00000198825	-20340	ENSG00000198825	-20340	-20340	distal	121558833	+	-20340	INPP5F	50	95	33	44	46	55	71	39	64	45	44	33	97
10	121470427	121470607	ENSG00000198825	-15001	ENSG00000198825	-15001	-15001	distal	121558833	+	-15001	INPP5F	2	6	4	5	2	5	12	4	2	0	5	4	1
10	121484861	121485675	ENSG00000198825	0	ENSG00000198825	-0.00725911	0	promoter	121588652	+	-0.00725911	INPP5F	73	290	66	56	55	70	109	58	101	60	77	31	120
10	121494497	121494648	ENSG00000198825	0	ENSG00000198825	0.0862553	0.0862455	promoter	121588652	+	0.0862553	INPP5F	4	9	4	8	7	11	9	4	1	5	5	2	6
10	121497381	121497695	ENSG00000198825	0	ENSG00000198825	0.114244	0.114234	promoter	121588652	+	0.114244	INPP5F	7	32	8	16	6	17	16	9	8	9	8	11	12
10	121510090	121510415	ENSG00000198825	0	ENSG00000198825	0.23758	-17343	distal	121588652	+	0.23758	INPP5F	6	22	13	19	9	8	18	16	4	8	15	17	11
10	121544326	121544484	ENSG00000198825	0	ENSG00000198825	0.301286	0.301191	promoter	121551717	+	0.301286	INPP5F	2	5	0	2	0	1	3	1	3	0	6	2	11
10	12154734	12155001	ENSG00000181192	0	ENSG00000181192	0.984336	3277	distal	12155028	+	0.984336	DHTKD1	3	0	1	1	2	0	17	7	6	21	15	3	3
10	121567532	121567819	ENSG00000198825	0	ENSG00000198825	0.795037	6921	distal	121588652	+	0.795037	INPP5F	1	12	4	3	3	1	18	1	2	4	1	3	1
10	121593691	121593968	ENSG00000197771	0	ENSG00000197771	0.929797	10281	distal	121633133	-	0.929797	MCMBP	2	33	3	11	9	8	5	0	3	3	3	3	2
10	121596365	121596656	ENSG00000197771	0	ENSG00000197771	0.866761	12955	distal	121633133	-	0.866761	MCMBP	4	2	1	9	11	6	20	3	2	4	4	5	3
10	121620819	121621034	ENSG00000197771	0	ENSG00000197771	0.932639	-3069	distal	121652068	-	0.932639	MCMBP	4	18	6	12	3	3	8	2	1	4	2	2	11
10	121631616	121631893	ENSG00000197771	0	ENSG00000197771	0.610398	0.00859241	promoter	121652068	-	0.610398	MCMBP	11	73	3	14	2	8	9	12	11	13	12	8	16
10	121632383	121633216	ENSG00000197771	0	ENSG00000197771	0.587507	0	promoter	121652068	-	0.587507	MCMBP	40	147	32	56	37	35	51	43	58	48	60	26	64
10	12164509	12165142	ENSG00000181192	0	ENSG00000181192	0.986821	2150	distal	12165224	+	0.986821	DHTKD1	46	14	9	90	75	86	178	68	124	158	163	27	24
10	121651849	121652553	ENSG00000197771	0	ENSG00000197771	0.00653614	0	promoter	121652068	-	0.00653614	MCMBP	83	289	50	63	42	57	94	57	69	69	75	30	131
10	121679434	121679632	ENSG00000107651	0	ENSG00000107651	0.566453	1996	distal	121700246	+	0.566453	SEC23IP	6	15	4	3	4	1	10	1	4	9	5	2	0
10	12171083	12171843	ENSG00000065665	0	ENSG00000065665	-0.026944	0	promoter	12195819	+	-0.026944	SEC61A2	37	86	24	33	17	24	21	16	43	27	33	13	49
10	12172220	12172575	ENSG00000065665	0	ENSG00000065665	0.0202599	183	promoter	12195819	+	0.0202599	SEC61A2	12	43	14	17	13	15	23	16	18	26	28	8	14
10	121732850	121733054	ENSG00000265370	14745	ENSG00000265370	14745	14745	distal	121718104	+	14745	MIR4682	3	9	1	1	0	0	8	1	3	4	6	1	25
10	12182107	12182300	ENSG00000065665	0	ENSG00000065665	0.292795	-2838	distal	12191766	+	0.292795	SEC61A2	2	12	3	4	3	0	4	0	1	4	2	2	22
10	122360865	122361054	ENSG00000177234	1235	ENSG00000177234	1235	1235	distal	122359629	+	1235	C10orf85	11	0	2	1	5	5	1	4	6	20	9	4	17
10	122365581	122365915	ENSG00000177234	5951	ENSG00000177234	5951	5951	distal	122359629	+	5951	C10orf85	14	0	1	16	11	7	1	8	12	52	50	16	25
10	122366875	122368103	ENSG00000177234	7245	ENSG00000177234	7245	7245	distal	122359629	+	7245	C10orf85	109	5	7	87	67	105	15	61	55	111	92	49	138
10	12237655	12238638	ENSG00000165609	0	ENSG00000165609	0.0104988	0	promoter	12237844	-	0.0104988	NUDT5	82	245	49	66	48	115	124	88	119	112	68	59	139
10	122451199	122451431	ENSG00000227165	69892	ENSG00000227165	69892	69892	distal	122536396	-	69892	WDR11-AS1	18	2	1	1	0	8	2	3	2	11	8	6	23
10	12256754	12257212	ENSG00000151465	0	ENSG00000151465	0.451869	-2200	promoter	12279223	+	0.451869	CDC123	6	30	12	5	3	17	13	8	15	15	19	12	23
10	122586908	122587422	ENSG00000227165	0	ENSG00000227165	0.340117	0.285242	promoter	122590100	-	0.340117	WDR11-AS1	11	1	0	36	18	28	2	6	5	42	38	36	15
10	122610583	122611462	ENSG00000227165	0	ENSG00000227165	0.00154368	0	promoter	122610721	-	0.00154368	WDR11-AS1	84	272	59	93	58	69	144	70	118	93	90	54	170
10	122702374	122702759	ENSG00000227307	0	ENSG00000227307	0.686061	33338	distal	122740213	-	0.686061	RP11-95I16.2	17	20	4	7	8	7	29	5	10	13	14	5	16
10	122828643	122828819	ENSG00000236762	63784	ENSG00000236762	63784	63784	distal	122893237	-	63784	RP11-159H3.1	0	1	0	1	2	1	4	1	1	3	4	1	13
10	12306177	12306899	ENSG00000265824	2250	ENSG00000265824	2250	2250	distal	12303926	+	2250	RN7SL232P	66	196	30	121	92	78	95	72	95	71	46	33	99
10	12307633	12308070	ENSG00000265824	3706	ENSG00000265824	3706	3706	distal	12303926	+	3706	RN7SL232P	41	14	3	52	55	39	15	34	43	80	62	22	32
10	123185911	123186208	ENSG00000222979	15196	ENSG00000222979	15196	15196	distal	123170714	+	15196	RN7SKP167	14	5	0	2	2	8	18	2	2	2	4	5	24
10	12349533	12349723	ENSG00000264036	20411	ENSG00000264036	20411	20411	distal	12370388	-	20411	RN7SL198P	1	1	1	5	1	0	0	5	12	3	2	1	1
10	123513683	123513972	ENSG00000107669	0	ENSG00000107669	0.941989	14437	distal	123687416	-	0.941989	ATE1	24	3	3	6	8	7	39	10	18	10	5	9	32
10	123581956	123582121	ENSG00000107669	0	ENSG00000107669	0.57181	-23993	distal	123687416	-	0.57181	ATE1	1	8	3	0	0	0	1	2	0	3	2	3	3
10	123583570	123583783	ENSG00000107669	0	ENSG00000107669	0.563058	-22331	distal	123687416	-	0.563058	ATE1	5	7	5	3	2	3	16	3	4	5	9	5	4
10	123659863	123660470	ENSG00000107669	0	ENSG00000107669	0.0356567	0.0257575	promoter	123662053	-	0.0356567	ATE1	12	30	5	13	4	5	21	10	16	12	19	9	24
10	123674233	123674518	ENSG00000107669	0	ENSG00000107669	0.529736	-12179	distal	123687977	-	0.529736	ATE1	3	4	0	0	0	3	17	1	3	14	22	0	5
10	123686534	123687261	ENSG00000107669	0	ENSG00000107669	0.0556177	0.000834996	promoter	123687977	-	0.0556177	ATE1	16	133	29	27	25	40	36	42	49	47	27	22	39
10	123687587	123687905	ENSG00000107669	0	ENSG00000107669	0.0150318	0	promoter	123687977	-	0.0150318	ATE1	15	54	9	14	6	15	24	16	21	17	15	5	23
10	123733963	123735025	ENSG00000107672	0	ENSG00000107672	0.0907255	0	promoter	123734637	-	0.0907255	NSMCE4A	31	94	18	29	21	15	37	16	26	19	26	7	42
10	12375256	12376317	ENSG00000264036	-4867	ENSG00000264036	-4867	-4867	distal	12370388	-	-4867	RN7SL198P	67	56	32	99	87	153	54	265	361	157	129	59	190
10	12390831	12391021	ENSG00000183049	-459	ENSG00000183049	-459	-459	promoter	12877545	+	-459	CAMK1D	8	24	10	14	4	8	9	9	26	7	6	5	17
10	12391408	12391742	ENSG00000183049	0	ENSG00000183049	-0.000680086	0	promoter	12868142	+	-0.000680086	CAMK1D	17	98	21	17	18	18	26	20	31	13	16	6	47
10	12392338	12392929	ENSG00000183049	0	ENSG00000183049	0.00127201	0.00126991	promoter	12868142	+	0.00127201	CAMK1D	32	86	23	40	23	39	34	42	67	42	43	23	45
10	12397823	12398016	ENSG00000183049	0	ENSG00000183049	0.0127852	0.0127831	promoter	12868142	+	0.0127852	CAMK1D	7	2	0	14	5	20	8	2	0	8	5	4	4
10	12407916	12408779	ENSG00000183049	0	ENSG00000183049	0.0339707	0.0339686	promoter	12868142	+	0.0339707	CAMK1D	68	256	66	94	65	133	97	157	228	99	75	60	167
10	124133728	124134231	ENSG00000107679	0	ENSG00000107679	-0.00853485	0	promoter	124191866	+	-0.00853485	PLEKHA1	17	3	0	15	7	40	19	7	16	43	42	21	14
10	124134808	124135251	ENSG00000107679	0	ENSG00000107679	0.0120078	0.0119815	promoter	124172492	+	0.0120078	PLEKHA1	18	1	0	21	16	45	15	4	10	42	32	27	30
10	12446744	12447368	ENSG00000183049	0	ENSG00000183049	0.115472	-10558	distal	12868142	+	0.115472	CAMK1D	11	55	13	11	13	1	33	42	65	17	12	5	6
10	12451689	12452041	ENSG00000183049	0	ENSG00000183049	0.125852	-5885	distal	12868142	+	0.125852	CAMK1D	7	13	0	19	9	7	9	27	29	46	40	19	33
10	12461206	12461848	ENSG00000183049	0	ENSG00000183049	0.145828	3206	distal	12868142	+	0.145828	CAMK1D	6	11	5	5	3	9	7	45	55	18	18	4	6
10	124638877	124639533	ENSG00000213185	0	ENSG00000213185	0.00904419	0	promoter	124639097	-	0.00904419	FAM24B	66	1	0	41	21	20	24	20	30	33	32	33	70
10	124713446	124714062	ENSG00000119965	0	ENSG00000119965	0.0206595	0	promoter	124713919	-	0.0206595	C10orf88	61	163	34	49	23	45	68	47	60	57	71	31	107
10	124739643	124740447	ENSG00000179988	0	ENSG00000179988	-0.0412077	0	promoter	124749851	+	-0.0412077	PSTK	43	174	41	47	24	55	84	51	69	70	68	30	90
10	124757387	124757940	ENSG00000095574	0	ENSG00000095574	1.03363	0.819579	promoter	124768328	-	1.03363	IKZF5	12	62	14	9	7	20	11	7	7	24	21	21	20
10	124767483	124768947	ENSG00000095574	0	ENSG00000095574	0.0798299	0	promoter	124768328	-	0.0798299	IKZF5	115	311	60	99	49	99	112	88	111	128	108	62	147
10	124798766	124799098	ENSG00000196177	0	ENSG00000196177	0.379634	0.379556	promoter	124806765	+	0.379634	ACADSB	2	0	1	2	2	6	8	6	0	21	20	8	11
10	124802973	124803141	ENSG00000196177	0	ENSG00000196177	0.70591	0.705832	promoter	124806765	+	0.70591	ACADSB	5	7	2	4	5	3	15	4	7	5	7	4	6
10	124889210	124889424	ENSG00000188620	-6053	ENSG00000188620	-6053	-6053	distal	124897257	+	-6053	HMX3	4	5	1	1	1	0	1	5	12	1	3	1	1
10	124892464	124892944	ENSG00000188620	-2533	ENSG00000188620	-2533	-2533	distal	124897257	+	-2533	HMX3	21	47	14	17	13	17	20	24	24	26	18	14	24
10	12490574	12491247	ENSG00000183049	0	ENSG00000183049	0.207473	-7234	distal	12868142	+	0.207473	CAMK1D	71	31	14	68	77	89	59	117	213	76	74	65	73
10	124913486	124914567	ENSG00000154473	0	ENSG00000154473	-0.11348	0	promoter	124922209	+	-0.11348	BUB3	168	495	100	132	102	119	184	113	185	149	171	89	302
10	125000819	125001509	ENSG00000265463	-25114	ENSG00000265463	-25114	-25114	distal	124975704	-	-25114	AC012391.1	28	124	35	35	46	50	9	11	11	18	15	15	8
10	12505024	12505787	ENSG00000183049	0	ENSG00000183049	0.237804	6393	distal	12868142	+	0.237804	CAMK1D	25	3	3	47	38	56	54	27	85	111	89	29	51
10	125060678	125060899	ENSG00000270902	22038	ENSG00000270902	22038	22038	distal	125083102	-	22038	RP11-338O1.3	1	16	9	9	5	1	1	4	2	1	3	4	5
10	125086306	125086471	ENSG00000270902	-3203	ENSG00000270902	-3203	-3203	distal	125083102	-	-3203	RP11-338O1.3	2	16	1	5	0	1	2	1	1	6	6	2	12
10	125086937	125087268	ENSG00000270902	-3834	ENSG00000270902	-3834	-3834	distal	125083102	-	-3834	RP11-338O1.3	5	18	5	9	6	4	21	4	3	24	18	4	30
10	125151669	125152183	ENSG00000230131	0	ENSG00000230131	0.221403	33045	distal	125277224	+	0.221403	RP11-282I1.1	8	27	4	29	28	22	8	20	25	21	18	7	27
10	125157591	125158098	ENSG00000230131	0	ENSG00000230131	0.258127	27130	distal	125277224	+	0.258127	RP11-282I1.1	44	242	36	52	46	42	80	23	46	100	79	44	117
10	125162106	125162635	ENSG00000230131	0	ENSG00000230131	0.286125	22593	distal	125277224	+	0.286125	RP11-282I1.1	45	163	39	44	32	27	4	43	62	84	74	34	126
10	125172868	125173093	ENSG00000230131	0	ENSG00000230131	0.352863	12135	distal	125277224	+	0.352863	RP11-282I1.1	5	14	1	4	2	4	5	4	6	4	3	0	6
10	125202492	125202717	ENSG00000230131	0	ENSG00000230131	0.536569	-6151	distal	125277224	+	0.536569	RP11-282I1.1	3	0	0	3	0	2	0	5	4	1	5	0	19
10	12524685	12524875	ENSG00000183049	0	ENSG00000183049	0.279073	26054	distal	12868142	+	0.279073	CAMK1D	6	33	4	2	3	10	30	16	33	3	8	0	6
10	12526665	12527697	ENSG00000183049	0	ENSG00000183049	0.283229	28034	distal	12868142	+	0.283229	CAMK1D	127	399	83	176	134	184	173	121	217	121	113	72	198
10	125266774	125267166	ENSG00000230131	0	ENSG00000230131	0.935197	17921	distal	125277224	+	0.935197	RP11-282I1.1	9	26	1	1	4	0	3	4	2	10	4	4	4
10	125282408	125282848	ENSG00000230131	5183	ENSG00000230131	5183	-50894	distal	125277224	+	5183	RP11-282I1.1	13	35	11	19	12	3	9	19	17	11	6	9	21
10	125296970	125297507	ENSG00000230131	19745	ENSG00000230131	19745	-36235	distal	125277224	+	19745	RP11-282I1.1	10	60	10	8	9	4	9	20	31	11	8	6	23
10	125318931	125319135	ENSG00000234542	-14607	ENSG00000234542	-14607	-14607	distal	125343283	+	-14607	RP11-282I1.2	2	17	1	9	4	3	7	10	3	5	3	4	11
10	125341682	125342011	ENSG00000234542	0	ENSG00000234542	0.83218	0.832075	promoter	125343283	+	0.83218	RP11-282I1.2	11	7	5	12	8	8	14	10	8	8	8	9	21
10	12555736	12556177	ENSG00000183049	0	ENSG00000183049	0.34425	57105	distal	12868142	+	0.34425	CAMK1D	0	33	8	4	6	1	1	10	3	7	5	3	2
10	125608446	125608939	ENSG00000121898	0	ENSG00000121898	0.293368	30785	distal	125651330	-	0.293368	CPXM2	28	26	9	11	1	8	74	1	1	6	7	1	27
10	125617479	125617782	ENSG00000121898	0	ENSG00000121898	0.231574	21942	distal	125651330	-	0.231574	CPXM2	3	3	1	4	2	0	21	0	1	1	4	3	4
10	125626041	125626209	ENSG00000121898	0	ENSG00000121898	0.173001	13515	distal	125651330	-	0.173001	CPXM2	2	0	1	1	3	1	12	3	0	3	2	1	2
10	125661264	125661430	ENSG00000121898	0	ENSG00000121898	0.164569	9564	distal	125699783	-	0.164569	CPXM2	2	1	0	2	2	2	0	3	1	2	4	0	23
10	125686312	125686533	ENSG00000234677	0	ENSG00000234677	0.266382	0.254064	promoter	125691113	-	0.266382	RP11-285A18.2	12	3	2	12	0	1	5	6	4	3	1	6	8
10	125748326	125748507	ENSG00000213438	-2918	ENSG00000213438	-2918	-2918	distal	125752185	+	-2918	RP11-47G11.3	6	16	5	1	4	2	1	0	1	7	6	3	3
10	125754093	125754435	ENSG00000213438	1907	ENSG00000213438	1907	1907	distal	125752185	+	1907	RP11-47G11.3	22	85	17	33	17	14	37	19	27	29	34	16	26
10	125755105	125755726	ENSG00000213438	2919	ENSG00000213438	2919	2919	distal	125752185	+	2919	RP11-47G11.3	43	152	28	38	32	33	68	31	32	31	32	17	37
10	125756904	125757499	ENSG00000213438	4718	ENSG00000213438	4718	4718	distal	125752185	+	4718	RP11-47G11.3	63	208	52	60	45	42	138	41	55	140	122	23	160
10	125773867	125774383	ENSG00000182022	0	ENSG00000182022	0.828934	-9522	distal	125806241	-	0.828934	CHST15	1	3	3	0	1	34	24	3	3	1	0	3	2
10	125784786	125785029	ENSG00000182022	0	ENSG00000182022	0.94232	0.747277	promoter	125853206	-	0.94232	CHST15	2	14	6	2	5	3	7	7	5	10	3	4	1
10	125795102	125796070	ENSG00000182022	0	ENSG00000182022	0.800242	0.117694	promoter	125853206	-	0.800242	CHST15	179	713	124	166	93	131	54	174	234	138	111	83	278
10	125802736	125803105	ENSG00000182022	0	ENSG00000182022	0.695102	0.0802714	promoter	125853206	-	0.695102	CHST15	6	21	3	4	5	3	0	2	2	11	7	10	7
10	125803156	125803341	ENSG00000182022	0	ENSG00000182022	0.689318	0.0742287	promoter	125853206	-	0.689318	CHST15	1	10	0	1	0	0	2	1	1	3	2	0	1
10	125809184	125809425	ENSG00000182022	0	ENSG00000182022	0.923164	-2942	distal	125853098	-	0.923164	CHST15	3	24	8	7	12	3	14	3	4	13	7	5	5
10	125813524	125813937	ENSG00000182022	0	ENSG00000182022	0.831928	-7282	distal	125853098	-	0.831928	CHST15	4	28	7	5	4	1	3	7	4	4	6	4	3
10	125822929	125823908	ENSG00000182022	0	ENSG00000182022	0.634216	-16687	distal	125853098	-	0.634216	CHST15	55	295	61	51	32	96	79	112	189	128	123	33	115
10	125825098	125825339	ENSG00000182022	0	ENSG00000182022	0.588619	-18856	distal	125853098	-	0.588619	CHST15	14	98	11	33	10	30	19	26	23	22	23	17	35
10	125827363	125827667	ENSG00000182022	0	ENSG00000182022	0.541004	-21121	distal	125853098	-	0.541004	CHST15	14	77	23	12	10	11	10	25	56	35	22	14	30
10	125828944	125829372	ENSG00000182022	0	ENSG00000182022	0.507768	0.266518	promoter	125853098	-	0.507768	CHST15	14	43	12	33	28	54	49	21	26	16	16	18	15
10	125831662	125832078	ENSG00000182022	0	ENSG00000182022	0.45063	0.234602	promoter	125853098	-	0.45063	CHST15	12	89	14	16	16	22	34	14	15	11	14	16	34
10	125834144	125834548	ENSG00000182022	0	ENSG00000182022	0.398453	0.20547	promoter	125853098	-	0.398453	CHST15	6	46	10	17	17	10	10	39	47	31	25	21	32
10	125839339	125840094	ENSG00000182022	0	ENSG00000182022	0.289243	0.140059	promoter	125853098	-	0.289243	CHST15	16	113	24	41	15	27	54	29	34	27	36	25	52
10	125844215	125844432	ENSG00000182022	0	ENSG00000182022	0.186739	0.0888944	promoter	125853098	-	0.186739	CHST15	1	50	7	2	3	1	11	5	4	13	14	3	14
10	125846970	125847205	ENSG00000182022	0	ENSG00000182022	0.128823	0.0561885	promoter	125853098	-	0.128823	CHST15	5	47	12	1	2	0	5	16	14	16	6	4	14
10	125851964	125852520	ENSG00000182022	0	ENSG00000182022	0.0238391	0	promoter	125853098	-	0.0238391	CHST15	37	138	31	41	17	45	28	39	45	29	32	17	66
10	125853029	125853425	ENSG00000182022	0	ENSG00000182022	0.00145052	0	promoter	125853098	-	0.00145052	CHST15	22	94	9	28	13	19	14	39	59	19	19	11	13
10	125859129	125859420	ENSG00000182022	-5922	ENSG00000182022	-5922	-5922	distal	125853206	-	-5922	CHST15	2	1	1	15	8	8	3	8	4	24	14	4	6
10	125865313	125865609	ENSG00000182022	-12106	ENSG00000182022	-12106	-12106	distal	125853206	-	-12106	CHST15	10	31	10	11	10	9	13	14	20	13	12	18	8
10	125865690	125866631	ENSG00000182022	-12483	ENSG00000182022	-12483	-12483	distal	125853206	-	-12483	CHST15	37	111	24	44	19	47	47	42	58	102	81	41	62
10	125919714	125920330	ENSG00000182022	-66507	ENSG00000182022	-66507	-66507	distal	125853206	-	-66507	CHST15	6	39	22	25	20	5	7	12	11	29	59	8	33
10	125939976	125940238	ENSG00000182022	-86769	ENSG00000182022	-86769	-86769	distal	125853206	-	-86769	CHST15	4	30	6	3	3	5	3	11	15	13	9	7	10
10	125974057	125974597	ENSG00000065154	111274	ENSG00000065154	111274	111992	distal	126107545	-	111274	OAT	13	41	10	9	5	7	8	36	42	22	17	5	19
10	125978905	125979144	ENSG00000065154	106727	ENSG00000065154	106727	107445	distal	126107545	-	106727	OAT	2	4	4	3	0	1	6	6	17	10	13	3	2
10	126040192	126040357	ENSG00000065154	45514	ENSG00000065154	45514	46232	distal	126107545	-	45514	OAT	2	12	1	0	2	0	1	2	0	5	3	3	4
10	126043506	126043832	ENSG00000065154	42039	ENSG00000065154	42039	42757	distal	126107545	-	42039	OAT	14	24	6	16	6	9	23	14	13	14	8	4	7
10	126077584	126078226	ENSG00000065154	7645	ENSG00000065154	7645	8363	distal	126107545	-	7645	OAT	16	39	8	20	11	27	21	18	28	25	32	19	26
10	126078395	126078816	ENSG00000065154	7055	ENSG00000065154	7055	7773	distal	126107545	-	7055	OAT	1	2	0	2	3	2	40	6	10	3	6	29	3
10	126092070	126092385	ENSG00000065154	0	ENSG00000065154	0.749292	-164	promoter	126097360	-	0.749292	OAT	15	30	11	9	19	15	28	10	9	23	23	8	26
10	126102124	126102405	ENSG00000065154	0	ENSG00000065154	0.158939	0.108064	promoter	126103005	-	0.158939	OAT	2	1	2	10	5	10	10	0	1	28	17	13	20
10	126107386	126107908	ENSG00000065154	0	ENSG00000065154	0.00550187	0	promoter	126107505	-	0.00550187	OAT	72	323	61	56	44	26	93	67	95	49	53	32	135
10	126124662	126125305	ENSG00000269962	8502	ENSG00000269962	8502	8502	distal	126134344	-	8502	RP13-238F13.5	66	160	36	49	57	34	45	58	66	46	47	22	94
10	126150098	126150334	ENSG00000107902	-68	ENSG00000107902	-68	-68	promoter	126187083	+	-68	LHPP	9	19	8	7	5	2	11	10	7	5	11	6	18
10	126150648	126150851	ENSG00000107902	0	ENSG00000107902	0.00154959	0.00154303	promoter	126302710	+	0.00154959	LHPP	9	20	10	7	6	4	6	5	9	4	11	3	6
10	126154031	126154335	ENSG00000107902	0	ENSG00000107902	0.0237626	0.0237561	promoter	126302710	+	0.0237626	LHPP	15	7	5	4	3	8	4	8	12	19	14	8	14
10	126196877	126197236	ENSG00000107902	0	ENSG00000107902	0.686369	-17729	distal	126205945	+	0.686369	LHPP	9	0	2	13	15	16	14	8	12	6	9	12	10
10	126212059	126212234	ENSG00000107902	0	ENSG00000107902	0.404779	-22318	distal	126302710	+	0.404779	LHPP	1	13	1	2	3	0	3	7	9	4	10	7	5
10	126218666	126219122	ENSG00000107902	0	ENSG00000107902	0.448161	-15430	distal	126302710	+	0.448161	LHPP	26	45	9	17	10	6	19	14	22	16	13	9	30
10	126228775	126229106	ENSG00000107902	0	ENSG00000107902	0.514537	-5446	distal	126302710	+	0.514537	LHPP	5	24	4	17	8	6	1	8	13	7	10	5	11
10	126290125	126290343	ENSG00000107902	0	ENSG00000107902	0.772734	-3425	distal	126306457	+	0.772734	LHPP	3	1	1	11	4	0	0	2	3	1	5	24	1
10	126301168	126301551	ENSG00000107902	0	ENSG00000107902	-0.424682	0	promoter	126301953	+	-0.424682	LHPP	8	3	2	26	9	7	3	6	11	3	6	15	2
10	12630162	12630496	ENSG00000183049	0	ENSG00000183049	0.500472	9339	distal	12868142	+	0.500472	CAMK1D	1	1	1	3	1	3	3	27	26	0	5	4	1
10	126302882	126303171	ENSG00000107902	0	ENSG00000107902	0.950253	928	distal	126306457	+	0.950253	LHPP	6	19	5	9	4	9	1	15	15	11	8	10	6
10	126307646	126308840	ENSG00000189319	0	ENSG00000189319	1.00172	5692	distal	126432619	-	1.00172	FAM53B	19	112	25	69	35	19	9	40	24	36	28	26	13
10	126315369	126316099	ENSG00000189319	0	ENSG00000189319	0.957716	13415	distal	126431539	-	0.957716	FAM53B	41	103	23	46	27	29	9	43	55	21	15	20	26
10	126329718	126330329	ENSG00000189319	0	ENSG00000189319	0.839422	27764	distal	126431539	-	0.839422	FAM53B	17	53	11	59	38	24	6	14	29	33	28	29	6
10	126330776	126331132	ENSG00000189319	0	ENSG00000189319	0.830699	28822	distal	126431539	-	0.830699	FAM53B	3	47	6	2	2	0	0	3	5	3	4	4	5
10	126336357	126336723	ENSG00000189319	0	ENSG00000189319	0.784689	34403	distal	126431539	-	0.784689	FAM53B	8	84	12	17	14	9	2	14	9	7	11	8	9
10	126337235	126337726	ENSG00000189319	0	ENSG00000189319	0.777451	35281	distal	126431539	-	0.777451	FAM53B	9	121	21	30	6	10	18	7	14	9	17	18	13
10	126346510	126346675	ENSG00000189319	0	ENSG00000189319	0.700987	44556	distal	126431539	-	0.700987	FAM53B	2	12	2	9	8	4	0	6	4	6	7	2	3
10	126366037	126366543	ENSG00000189319	0	ENSG00000189319	0.866656	-25650	distal	126432838	-	0.866656	FAM53B	1	2	3	41	17	50	1	1	0	2	3	13	3
10	126366606	126367209	ENSG00000189319	0	ENSG00000189319	0.859274	-24984	distal	126432838	-	0.859274	FAM53B	1	3	3	40	19	28	1	0	3	1	2	10	7
10	126372049	126372286	ENSG00000189319	0	ENSG00000189319	0.788658	-19907	distal	126432838	-	0.788658	FAM53B	2	14	1	3	2	0	2	1	2	5	1	4	2
10	126375469	126375847	ENSG00000189319	0	ENSG00000189319	0.744288	-16346	distal	126432838	-	0.744288	FAM53B	14	1	0	11	11	30	1	3	2	26	23	13	1
10	126377300	126377846	ENSG00000189319	0	ENSG00000189319	0.720533	-14347	distal	126432838	-	0.720533	FAM53B	2	176	21	13	19	4	7	5	5	9	15	2	1
10	126382167	126382806	ENSG00000189319	0	ENSG00000189319	0.65739	-9387	distal	126432838	-	0.65739	FAM53B	49	205	37	73	62	104	15	52	81	61	42	63	37
10	126385133	126385579	ENSG00000189319	0	ENSG00000189319	0.61891	-6614	distal	126432838	-	0.61891	FAM53B	14	118	16	31	13	16	9	32	33	19	20	12	27
10	126390891	126391236	ENSG00000189319	0	ENSG00000189319	0.544208	-957	promoter	126432838	-	0.544208	FAM53B	1	15	6	5	8	0	2	2	1	3	2	3	0
10	126396735	126396977	ENSG00000189319	0	ENSG00000189319	0.46839	0.418216	promoter	126432838	-	0.46839	FAM53B	1	13	3	0	1	1	4	2	1	1	0	0	0
10	126397039	126397217	ENSG00000189319	0	ENSG00000189319	0.464446	0.450152	promoter	126432838	-	0.464446	FAM53B	2	8	1	1	0	0	0	1	0	3	3	1	1
10	126406637	126407250	ENSG00000189319	0	ENSG00000189319	0.339924	4364	distal	126432838	-	0.339924	FAM53B	126	547	156	125	116	119	52	82	142	134	148	89	121
10	126407841	126408251	ENSG00000189319	0	ENSG00000189319	0.324304	5568	distal	126432838	-	0.324304	FAM53B	49	294	71	69	49	69	18	57	104	36	50	36	21
10	126411583	126412326	ENSG00000189319	0	ENSG00000189319	0.275756	9310	distal	126432838	-	0.275756	FAM53B	70	454	102	118	74	118	112	119	165	182	171	81	151
10	126417055	126417357	ENSG00000189319	0	ENSG00000189319	0.204764	0.116909	promoter	126432838	-	0.204764	FAM53B	5	79	20	23	26	16	11	16	20	40	42	18	1
10	126421368	126422180	ENSG00000189319	0	ENSG00000189319	0.148808	0.0771482	promoter	126432838	-	0.148808	FAM53B	78	235	62	64	58	49	25	103	138	66	57	44	80
10	126423214	126423632	ENSG00000189319	0	ENSG00000189319	0.124859	0.0651778	promoter	126432838	-	0.124859	FAM53B	3	62	12	6	8	0	3	17	16	1	3	6	3
10	126429114	126429297	ENSG00000189319	0	ENSG00000189319	0.0483141	0.018475	promoter	126432838	-	0.0483141	FAM53B	4	45	14	5	6	4	4	15	22	13	12	14	3
10	126429504	126430142	ENSG00000189319	0	ENSG00000189319	0.0432543	0.0115088	promoter	126432838	-	0.0432543	FAM53B	56	185	47	65	43	54	43	37	41	81	82	53	64
10	126430858	126431093	ENSG00000189319	0	ENSG00000189319	0.0256879	0.00366862	promoter	126432838	-	0.0256879	FAM53B	11	53	9	5	6	3	4	5	9	11	14	18	8
10	126437661	126438014	ENSG00000203791	0	ENSG00000203791	0.923668	-4822	distal	126449072	-	0.923668	METTL10	7	38	7	8	14	20	15	15	21	25	18	17	27
10	12647479	12648405	ENSG00000183049	0	ENSG00000183049	0.536821	26656	distal	12868142	+	0.536821	CAMK1D	44	169	32	52	34	24	51	47	80	51	34	33	89
10	126480197	126481075	ENSG00000203791	0	ENSG00000203791	0.00756573	0	promoter	126480437	-	0.00756573	METTL10	34	173	49	53	34	36	53	38	66	33	41	21	63
10	126481139	126481319	ENSG00000203791	-699	ENSG00000203791	-699	-699	promoter	126480439	-	-699	METTL10	5	13	1	1	3	4	3	3	4	1	4	1	4
10	126490070	126490537	ENSG00000165660	0	ENSG00000165660	-0.00814103	0	promoter	126525239	+	-0.00814103	FAM175B	26	71	18	17	21	18	25	16	28	21	25	8	69
10	126490650	126491151	ENSG00000165660	0	ENSG00000165660	0.00848502	0.00845636	promoter	126525239	+	0.00848502	FAM175B	14	59	11	10	9	13	13	9	20	17	14	5	13
10	126604901	126605569	ENSG00000249456	-142	ENSG00000249456	-142	-142	promoter	126631450	+	-142	RP11-298J20.4	42	160	40	43	20	37	41	40	49	54	47	19	84
10	126606277	126606656	ENSG00000249456	0	ENSG00000249456	0.021952	0.0219131	promoter	126631450	+	0.021952	RP11-298J20.4	7	47	11	13	14	18	27	20	31	26	27	12	24
10	126635606	126635834	ENSG00000019995	0	ENSG00000019995	0.106673	-604	promoter	126676758	+	0.106673	ZRANB1	0	25	3	1	1	1	2	0	0	0	2	2	4
10	126649182	126650004	ENSG00000019995	0	ENSG00000019995	0.401381	-14180	distal	126676758	+	0.401381	ZRANB1	19	135	37	22	10	12	33	36	34	48	43	32	80
10	126659988	126660208	ENSG00000019995	0	ENSG00000019995	0.635957	-9771	distal	126676758	+	0.635957	ZRANB1	2	29	6	4	3	4	3	2	5	3	4	2	9
10	126664674	126665099	ENSG00000019995	0	ENSG00000019995	0.737681	-4880	distal	126676758	+	0.737681	ZRANB1	4	82	6	1	2	0	3	0	4	3	1	2	4
10	126677331	126677750	ENSG00000175029	0	ENSG00000175029	1.0221	5265	distal	126694582	-	1.0221	CTBP2	9	47	5	1	7	7	12	15	12	24	27	20	16
10	12671271	12671446	ENSG00000183049	0	ENSG00000183049	0.586761	50448	distal	12868142	+	0.586761	CAMK1D	1	1	0	1	0	5	17	3	7	0	3	4	1
10	126736619	126737032	ENSG00000175029	0	ENSG00000175029	0.926206	-15179	distal	126849630	-	0.926206	CTBP2	10	25	6	5	6	9	14	7	10	10	13	7	15
10	126753168	126753844	ENSG00000175029	0	ENSG00000175029	0.790575	-31728	distal	126849630	-	0.790575	CTBP2	54	212	60	47	29	45	98	57	95	73	80	61	195
10	12676081	12676443	ENSG00000183049	0	ENSG00000183049	0.596858	55258	distal	12868142	+	0.596858	CAMK1D	9	7	5	21	7	39	8	6	7	3	3	3	7
10	12677188	12677487	ENSG00000183049	0	ENSG00000183049	0.599181	56365	distal	12868142	+	0.599181	CAMK1D	20	27	4	17	6	34	2	2	5	2	1	4	2
10	12680122	12680273	ENSG00000183049	0	ENSG00000183049	0.60534	59299	distal	12868142	+	0.60534	CAMK1D	11	11	1	2	1	13	12	6	4	2	0	2	6
10	126889588	126889986	ENSG00000214298	34081	ENSG00000214298	34081	34081	distal	126855506	+	34081	MRPS21P6	9	0	2	10	7	5	0	6	6	12	9	6	41
10	127407604	127408669	ENSG00000234134	0	ENSG00000234134	0.555556	0	promoter	127407934	-	0.555556	RP11-383C5.5	97	415	84	100	70	88	158	101	150	139	143	77	190
10	127472645	127472962	ENSG00000188690	4183	ENSG00000188690	4183	-8254	distal	127483796	-	4183	UROS	8	0	2	4	5	1	10	3	8	12	6	0	28
10	12749459	12749715	ENSG00000183049	0	ENSG00000183049	0.750881	17537	distal	12868142	+	0.750881	CAMK1D	8	7	1	5	6	7	29	14	9	19	11	15	5
10	127511573	127512308	ENSG00000188690	0	ENSG00000188690	0.00533283	0	promoter	127511658	-	0.00533283	UROS	65	137	32	52	21	43	46	47	56	85	67	23	85
10	12752947	12753368	ENSG00000183049	0	ENSG00000183049	0.758202	13884	distal	12868142	+	0.758202	CAMK1D	22	28	16	25	17	16	30	31	31	41	40	13	71
10	127584178	127584368	ENSG00000089876	0	ENSG00000089876	0.0282185	0.0217013	promoter	127585005	-	0.0282185	DHX32	6	13	2	8	1	3	8	4	10	3	10	5	10
10	127584977	127585299	ENSG00000089876	0	ENSG00000089876	0.000955403	0	promoter	127585005	-	0.000955403	DHX32	12	26	9	15	8	8	12	11	10	10	11	8	32
10	12772782	12773029	ENSG00000183049	0	ENSG00000183049	0.799836	-5429	distal	12868142	+	0.799836	CAMK1D	7	10	4	7	3	2	2	12	7	21	21	3	22
10	127730350	127730774	ENSG00000148848	0	ENSG00000148848	0.998747	22489	distal	128077024	-	0.998747	ADAM12	35	7	4	13	18	16	29	11	20	9	10	20	8
10	128192758	128192909	ENSG00000154493	0	ENSG00000154493	0.924743	-70	promoter	128210010	-	0.924743	C10orf90	1	0	2	6	2	5	9	0	0	1	2	4	0
10	128437784	128437937	ENSG00000199321	30333	ENSG00000199321	30333	30333	distal	128468343	-	30333	SNORD60	4	0	0	1	5	4	10	3	0	0	1	2	2
10	12844734	12845307	ENSG00000183049	0	ENSG00000183049	0.950866	-77381	distal	12868142	+	0.950866	CAMK1D	2	2	5	5	0	5	85	2	1	4	6	2	0
10	129595662	129595942	ENSG00000186766	56211	ENSG00000186766	56211	56211	distal	129539450	+	56211	FOXI2	15	1	6	5	8	4	6	21	3	20	18	11	6
10	129653383	129653619	ENSG00000270778	-12525	ENSG00000270778	-12525	-12525	distal	129666751	+	-12525	RP11-31A20.1	19	0	1	8	9	4	1	7	12	6	6	10	22
10	129809689	129810038	ENSG00000132334	0	ENSG00000132334	0.229147	0.22913	promoter	129854427	+	0.229147	PTPRE	23	22	3	15	7	5	21	7	8	17	20	9	24
10	129825041	129825501	ENSG00000132334	0	ENSG00000132334	0.493668	-20168	distal	129854427	+	0.493668	PTPRE	10	15	1	4	9	13	45	8	9	47	56	10	58
10	129833866	129834171	ENSG00000132334	0	ENSG00000132334	0.645726	-11498	distal	129854427	+	0.645726	PTPRE	4	17	1	3	3	3	12	9	6	12	12	5	12
10	129845531	129846083	ENSG00000132334	0	ENSG00000132334	-0.00952281	0	promoter	129884119	+	-0.00952281	PTPRE	68	136	19	32	23	44	64	41	47	55	52	27	124
10	129846230	129846501	ENSG00000132334	0	ENSG00000132334	0.00876413	0.00873797	promoter	129884119	+	0.00876413	PTPRE	9	15	6	6	7	9	9	10	20	13	19	10	9
10	129861043	129861639	ENSG00000132334	0	ENSG00000132334	-0.0176723	0	promoter	129869105	+	-0.0176723	PTPRE	37	24	9	7	6	34	9	10	10	17	19	17	58
10	129862936	129863278	ENSG00000132334	0	ENSG00000132334	0.221283	0.221156	promoter	129869105	+	0.221283	PTPRE	6	8	7	5	11	3	15	9	27	15	18	6	20
10	129867541	129868034	ENSG00000132334	0	ENSG00000132334	0.20814	0.207907	promoter	129870946	+	0.20814	PTPRE	11	24	12	14	14	22	43	4	11	17	37	15	33
10	129879031	129879246	ENSG00000132334	0	ENSG00000132334	0.86689	8084	distal	129884119	+	0.86689	PTPRE	2	2	3	2	2	2	16	1	1	5	2	5	4
10	12988098	12988321	ENSG00000151468	0	ENSG00000151468	0.756331	-21312	distal	13141652	-	0.756331	CCDC3	5	2	1	7	8	2	9	9	11	7	9	6	4
10	129885796	129886104	ENSG00000132334	1676	ENSG00000132334	1676	13643	distal	129884119	+	1676	PTPRE	0	0	1	3	1	2	3	3	1	18	27	9	12
10	129924593	129925313	ENSG00000148773	0	ENSG00000148773	0.00188387	0	promoter	129924649	-	0.00188387	MKI67	53	128	33	31	16	29	56	40	53	46	52	15	69
10	129948354	129948699	ENSG00000148773	-23704	ENSG00000148773	-23704	-23704	distal	129924649	-	-23704	MKI67	10	17	1	7	4	5	16	10	20	14	10	6	24
10	130010278	130010654	ENSG00000148773	-85628	ENSG00000148773	-85628	-85628	distal	129924649	-	-85628	MKI67	31	25	6	18	15	5	38	6	11	14	15	8	49
10	13025709	13025854	ENSG00000151468	0	ENSG00000151468	0.571077	0.169811	promoter	13141652	-	0.571077	CCDC3	2	1	0	4	2	1	3	0	1	6	3	2	15
10	130262616	130262985	ENSG00000234640	-144137	ENSG00000234640	-144137	-144137	distal	130118478	-	-144137	RP11-264E18.1	39	4	22	6	26	3	7	100	12	29	35	113	19
10	130427673	130427897	ENSG00000224190	-283245	ENSG00000224190	-283245	-283245	distal	130714535	+	-283245	RP11-442O18.2	5	0	2	3	7	9	1	1	4	2	2	7	21
10	130835354	130835667	ENSG00000232985	-77027	ENSG00000232985	-77027	-77027	distal	130758326	-	-77027	RP11-442O18.1	5	2	1	3	6	3	0	4	4	35	16	4	3
10	130854385	130854582	ENSG00000232985	-96058	ENSG00000232985	-96058	-96058	distal	130758326	-	-96058	RP11-442O18.1	2	1	0	1	2	4	27	2	0	0	2	4	4
10	130855662	130855992	ENSG00000232985	-97335	ENSG00000232985	-97335	-97335	distal	130758326	-	-97335	RP11-442O18.1	2	4	3	6	0	10	11	3	3	7	7	2	35
10	130856093	130856589	ENSG00000232985	-97766	ENSG00000232985	-97766	-97766	distal	130758326	-	-97766	RP11-442O18.1	1	5	2	11	14	14	26	5	6	16	9	7	49
10	130873224	130873501	ENSG00000232985	-114897	ENSG00000232985	-114897	-114897	distal	130758326	-	-114897	RP11-442O18.1	1	2	0	7	1	5	2	3	1	23	11	2	6
10	130959526	130959680	ENSG00000225424	-116834	ENSG00000225424	-116834	-116834	distal	131089986	+	-116834	RP11-168C9.1	1	3	0	2	1	2	3	3	1	4	14	2	0
10	131002251	131002503	ENSG00000225424	-74011	ENSG00000225424	-74011	-74011	distal	131089986	+	-74011	RP11-168C9.1	3	0	1	3	3	8	0	1	2	15	10	1	6
10	131031892	131032141	ENSG00000225424	-44373	ENSG00000225424	-44373	-44373	distal	131089986	+	-44373	RP11-168C9.1	4	1	3	3	3	3	7	5	8	7	5	2	6
10	13104871	13105179	ENSG00000151468	0	ENSG00000151468	0.181165	-4194	distal	13141652	-	0.181165	CCDC3	31	3	1	4	12	5	8	11	14	8	5	5	32
10	131076051	131076239	ENSG00000225424	-275	ENSG00000225424	-275	-275	promoter	131089986	+	-275	RP11-168C9.1	1	2	1	0	2	1	11	2	1	0	1	3	1
10	13116897	13117124	ENSG00000151468	0	ENSG00000151468	0.121931	-16220	distal	13141652	-	0.121931	CCDC3	11	11	2	3	2	2	17	9	7	8	11	6	4
10	131265176	131265719	ENSG00000170430	0	ENSG00000170430	-0.00500701	0	promoter	131335428	+	-0.00500701	MGMT	22	6	1	14	10	9	2	12	24	17	21	0	48
10	13130217	13130410	ENSG00000151468	0	ENSG00000151468	0.0563231	-11038	distal	13141652	-	0.0563231	CCDC3	1	1	2	1	0	2	2	4	5	2	3	1	1
10	13130416	13130567	ENSG00000151468	0	ENSG00000151468	0.0553429	-10881	distal	13141652	-	0.0553429	CCDC3	3	4	0	1	3	5	5	3	5	4	7	1	0
10	131404122	131404752	ENSG00000170430	0	ENSG00000170430	0.460982	-94596	distal	131566271	+	0.460982	MGMT	3	1	2	5	6	2	1	29	61	1	1	2	3
10	13141191	13142283	ENSG00000151468	0	ENSG00000151468	0.00227066	0	promoter	13141652	-	0.00227066	CCDC3	87	217	39	91	49	109	138	89	119	71	67	40	137
10	13142573	13142738	ENSG00000123240	0	ENSG00000123240	0.00914202	0.00911575	promoter	13180291	+	0.00914202	OPTN	14	39	6	13	8	13	14	15	23	15	14	12	16
10	13144282	13144449	ENSG00000123240	0	ENSG00000123240	0.0540377	0.0540115	promoter	13180291	+	0.0540377	OPTN	14	38	4	3	3	3	5	5	6	15	13	10	25
10	13157937	13158757	ENSG00000123240	0	ENSG00000123240	-0.0477633	0	promoter	13165198	+	-0.0477633	OPTN	20	74	20	39	34	36	5	7	5	28	29	7	59
10	131908546	131909978	ENSG00000237489	0	ENSG00000237489	0.0120379	0	promoter	131909081	-	0.0120379	LINC00959	243	731	158	203	119	198	266	201	305	316	240	109	440
10	131926008	131926321	ENSG00000233319	3712	ENSG00000233319	3712	3712	distal	131930505	-	3712	RP11-500G10.4	5	13	4	3	4	11	27	6	13	9	10	5	17
10	131934368	131934873	ENSG00000108010	0	ENSG00000108010	-0.00613025	0	promoter	131982785	+	-0.00613025	GLRX3	15	58	10	6	8	20	14	7	19	21	22	5	23
10	131940180	131940458	ENSG00000108010	0	ENSG00000108010	0.114646	0.114625	promoter	131982785	+	0.114646	GLRX3	7	22	3	3	6	2	5	5	8	3	10	3	7
10	131988367	131988684	ENSG00000108010	5581	ENSG00000108010	5581	9720	distal	131982785	+	5581	GLRX3	12	32	8	9	1	3	9	1	8	7	14	5	5
10	13203134	13203635	ENSG00000065328	0	ENSG00000065328	-0.00924061	0	promoter	13251736	+	-0.00924061	MCM10	75	232	56	50	68	78	101	51	100	62	74	40	146
10	132174598	132175176	ENSG00000236303	-62154	ENSG00000236303	-62154	-62154	distal	132281418	+	-62154	RP11-540N6.1	11	0	0	11	6	30	5	2	0	6	1	10	3
10	132264565	132265193	ENSG00000236303	0	ENSG00000236303	0.617733	0.61771	promoter	132281418	+	0.617733	RP11-540N6.1	17	7	5	1	1	120	12	5	0	5	10	14	26
10	13266611	13266788	ENSG00000165623	0	ENSG00000165623	0.773693	7235	distal	13276334	-	0.773693	UCMA	2	5	2	1	1	0	3	2	2	2	0	1	14
10	132840447	132840657	ENSG00000266057	-46796	ENSG00000266057	-46796	-46796	distal	132793650	-	-46796	AL607076.1	16	0	0	0	0	1	2	1	1	3	5	1	2
10	13313106	13314354	ENSG00000107537	5441	ENSG00000107537	5441	19106	distal	13341763	-	5441	PHYH	44	315	56	43	34	17	97	73	88	50	42	63	85
10	13329998	13330598	ENSG00000107537	0	ENSG00000107537	1.03557	2862	distal	13342052	-	1.03557	PHYH	12	80	15	12	13	9	3	22	30	10	11	13	29
10	13341372	13341744	ENSG00000107537	0	ENSG00000107537	0.148901	0	promoter	13342097	-	0.148901	PHYH	21	84	13	26	13	21	13	10	21	29	11	14	33
10	13341986	13342298	ENSG00000107537	0	ENSG00000107537	0.0227973	0	promoter	13342097	-	0.0227973	PHYH	16	85	8	27	7	18	11	15	21	17	28	9	43
10	13343964	13344624	ENSG00000107537	0	ENSG00000107537	0.0182344	0	promoter	13344412	-	0.0182344	PHYH	111	275	65	87	68	75	103	61	131	73	64	35	101
10	133467917	133468135	ENSG00000265977	-21379	ENSG00000265977	-21379	-21379	distal	133489584	+	-21379	AL450307.2	11	1	2	4	5	14	5	6	5	1	4	4	12
10	133575619	133575770	ENSG00000189275	28963	ENSG00000189275	28963	28963	distal	133622535	-	28963	AL450307.1	3	1	3	3	0	0	9	1	5	1	4	0	4
10	133741618	133742370	ENSG00000175470	-5584	ENSG00000175470	-5584	-5584	distal	133773331	+	-5584	PPP2R2D	3	102	23	1	5	1	39	22	31	59	57	4	12
10	13377946	13378212	ENSG00000086475	0	ENSG00000086475	0.70315	0.664393	promoter	13382790	-	0.70315	SEPHS1	2	3	0	25	8	3	5	9	6	1	3	2	15
10	133814962	133815455	ENSG00000176171	-19526	ENSG00000176171	-19526	-19526	distal	133795435	-	-19526	BNIP3	10	1	3	2	6	0	1	15	28	5	12	3	62
10	13382377	13383140	ENSG00000086475	0	ENSG00000086475	0.753707	0	promoter	13387460	-	0.753707	SEPHS1	26	70	14	69	33	27	58	52	77	42	32	13	73
10	133836555	133836720	ENSG00000176171	-41119	ENSG00000176171	-41119	-41119	distal	133795435	-	-41119	BNIP3	6	11	3	2	1	2	4	2	3	7	3	2	3
10	133842224	133842581	ENSG00000176171	-46788	ENSG00000176171	-46788	-46788	distal	133795435	-	-46788	BNIP3	5	26	4	1	1	2	1	6	5	0	0	7	17
10	13390318	13390490	ENSG00000086475	-20	ENSG00000086475	-20	-20	promoter	13390297	-	-20	SEPHS1	6	24	5	7	4	11	10	3	12	6	3	7	20
10	13391797	13392033	ENSG00000086475	-1499	ENSG00000086475	-1499	-1499	promoter	13390297	-	-1499	SEPHS1	6	8	5	9	3	9	8	12	23	11	9	12	13
10	133971967	133972450	ENSG00000188385	0	ENSG00000188385	0.358869	0.358845	promoter	133998313	+	0.358869	JAKMIP3	25	99	20	7	14	20	30	10	10	13	21	11	17
10	134121468	134122045	ENSG00000165752	0	ENSG00000165752	0.227399	-23	promoter	134145351	-	0.227399	STK32C	30	46	16	6	9	11	0	18	49	18	21	14	45
10	134124926	134125142	ENSG00000165752	0	ENSG00000165752	0.194474	-3481	distal	134145351	-	0.194474	STK32C	4	29	2	1	2	1	2	3	4	3	3	2	6
10	134133671	134134050	ENSG00000165752	0	ENSG00000165752	0.111209	0.0907766	promoter	134145351	-	0.111209	STK32C	5	9	4	9	9	2	6	13	15	9	6	8	20
10	13413866	13414380	ENSG00000086475	-23568	ENSG00000086475	-23568	-23568	distal	13390297	-	-23568	SEPHS1	14	32	6	14	11	16	24	15	25	12	23	14	18
10	134145492	134146177	ENSG00000148814	0	ENSG00000148814	-0.0067397	0	promoter	134188960	+	-0.0067397	LRRC27	50	224	46	40	27	42	40	47	65	63	57	26	86
10	134150491	134150782	ENSG00000148814	0	ENSG00000148814	-0.0137849	0	promoter	134161596	+	-0.0137849	LRRC27	5	38	9	4	2	7	3	15	17	14	14	6	21
10	134166286	134166488	ENSG00000148814	0	ENSG00000148814	0.0763284	0.0762635	promoter	134180505	+	0.0763284	LRRC27	5	12	2	5	4	5	3	7	2	2	5	4	3
10	134177867	134178062	ENSG00000148814	0	ENSG00000148814	0.828635	-912	promoter	134180505	+	0.828635	LRRC27	9	4	8	6	13	11	2	13	4	29	28	15	15
10	134201376	134201681	ENSG00000148814	6365	ENSG00000148814	6365	-8990	distal	134195010	+	6365	LRRC27	5	35	2	6	3	2	5	7	8	9	8	4	8
10	134209700	134209886	ENSG00000171813	-785	ENSG00000171813	-785	-785	promoter	134231367	+	-785	PWWP2B	1	28	5	2	0	2	3	2	3	3	3	2	5
10	134211214	134211687	ENSG00000171813	0	ENSG00000171813	0.0248158	0.0247674	promoter	134231334	+	0.0248158	PWWP2B	56	93	16	17	11	20	44	34	55	24	18	10	45
10	134221689	134221947	ENSG00000171813	0	ENSG00000171813	0.532522	-10639	distal	134231334	+	0.532522	PWWP2B	2	2	1	1	1	0	1	9	10	3	5	2	2
10	134232510	134232674	ENSG00000231705	0	ENSG00000231705	-0.0411765	0	promoter	134234457	+	-0.0411765	RP11-432J24.2	19	9	3	3	4	4	3	10	8	2	6	8	9
10	134234499	134235402	ENSG00000231705	41	ENSG00000231705	41	41	promoter	134234457	+	41	RP11-432J24.2	46	348	44	26	11	17	42	33	42	31	43	28	52
10	134235859	134236212	ENSG00000231705	1401	ENSG00000231705	1401	1401	distal	134234457	+	1401	RP11-432J24.2	8	121	24	9	3	1	4	19	23	6	10	15	21
10	134247869	134248334	ENSG00000234311	0	ENSG00000234311	0.918462	0.858341	promoter	134254988	-	0.918462	RP11-432J24.3	4	43	10	8	3	5	8	6	12	3	7	5	15
10	134257161	134257346	ENSG00000180066	-484	ENSG00000180066	-484	-484	promoter	134261424	+	-484	C10orf91	1	34	5	4	5	5	13	11	13	17	16	7	17
10	134260309	134260579	ENSG00000180066	0	ENSG00000180066	0.383029	0.382792	promoter	134262912	+	0.383029	C10orf91	22	86	8	5	3	9	12	10	18	6	15	12	13
10	134261870	134262939	ENSG00000180066	0	ENSG00000180066	0.753022	0.752785	promoter	134262912	+	0.753022	C10orf91	60	220	61	40	37	16	45	32	61	70	68	38	68
10	134266563	134267023	ENSG00000180066	3650	ENSG00000180066	3650	3650	distal	134262912	+	3650	C10orf91	22	67	18	17	11	24	33	17	23	27	45	15	41
10	134271138	134271360	ENSG00000180066	8225	ENSG00000180066	8225	8225	distal	134262912	+	8225	C10orf91	8	38	7	1	1	5	14	4	2	7	6	6	10
10	134332060	134332334	ENSG00000226900	-364	ENSG00000226900	-364	-364	promoter	134331695	-	-364	RP11-432J24.5	6	20	2	3	2	0	5	7	5	8	5	2	3
10	134350774	134351297	ENSG00000068383	-26	ENSG00000068383	-26	-26	promoter	134596979	+	-26	INPP5A	59	156	40	34	20	53	61	39	79	67	81	18	112
10	134355125	134355553	ENSG00000068383	0	ENSG00000068383	0.0202069	0.0202011	promoter	134523960	+	0.0202069	INPP5A	12	8	1	27	19	9	40	20	43	50	45	21	19
10	134357797	134358046	ENSG00000068383	0	ENSG00000068383	0.0357132	0.0357074	promoter	134523960	+	0.0357132	INPP5A	2	17	1	1	2	0	1	1	2	2	3	1	0
10	134358123	134358494	ENSG00000068383	0	ENSG00000068383	0.0376051	0.0375993	promoter	134523960	+	0.0376051	INPP5A	0	51	9	2	3	1	1	8	19	22	21	2	5
10	134360391	134360713	ENSG00000068383	0	ENSG00000068383	0.0507669	0.0507611	promoter	134523960	+	0.0507669	INPP5A	2	62	12	9	3	2	2	6	6	0	3	9	7
10	134364886	134365112	ENSG00000068383	0	ENSG00000068383	0.0768525	0.0768467	promoter	134523960	+	0.0768525	INPP5A	6	35	5	3	2	0	3	8	4	4	12	3	13
10	134368871	134369416	ENSG00000068383	0	ENSG00000068383	0.0999785	0.0999727	promoter	134523960	+	0.0999785	INPP5A	1	5	1	8	6	1	0	66	84	13	20	20	9
10	134377223	134377708	ENSG00000068383	0	ENSG00000068383	0.148447	0.148442	promoter	134523960	+	0.148447	INPP5A	1	11	5	2	7	2	5	51	58	5	3	1	5
10	134384631	134386039	ENSG00000068383	0	ENSG00000068383	0.191438	0.191432	promoter	134523960	+	0.191438	INPP5A	226	1093	229	123	70	81	141	200	227	147	140	39	366
10	134406834	134407299	ENSG00000068383	0	ENSG00000068383	0.320288	-14130	distal	134523960	+	0.320288	INPP5A	10	76	19	11	6	1	24	28	21	53	27	18	23
10	134438990	134439406	ENSG00000068383	0	ENSG00000068383	0.103382	0.103376	promoter	134591286	+	0.103382	INPP5A	4	38	3	1	0	2	1	5	2	7	1	1	2
10	134447721	134448086	ENSG00000068383	0	ENSG00000068383	0.154784	0.154778	promoter	134591286	+	0.154784	INPP5A	2	4	2	3	7	4	12	17	20	18	14	1	3
10	134451306	134451710	ENSG00000068383	0	ENSG00000068383	0.17589	0.175884	promoter	134591286	+	0.17589	INPP5A	8	26	9	7	2	4	13	6	8	4	14	12	16
10	13458851	13459012	ENSG00000233256	0	ENSG00000233256	0.207918	0.207792	promoter	13465133	+	0.207918	RP11-445K13.2	0	2	0	2	0	1	1	5	5	3	7	2	16
10	134709447	134709703	ENSG00000171811	0	ENSG00000171811	0.6664	12148	distal	134756089	-	0.6664	TTC40	1	0	1	3	3	0	3	17	1	13	13	0	4
10	134775806	134776352	ENSG00000232903	0	ENSG00000232903	0.14009	-64	promoter	134778793	-	0.14009	RP13-137A17.4	34	14	2	6	2	6	23	22	23	20	17	13	27
10	13481800	13482824	ENSG00000165626	0	ENSG00000165626	0.981924	2155	distal	13544976	-	0.981924	BEND7	17	73	12	45	20	31	29	49	72	40	33	12	42
10	134957444	134957929	ENSG00000235264	186	ENSG00000235264	186	186	promoter	134958808	-	186	RPL5P28	32	48	6	12	9	9	22	32	36	22	34	10	40
10	135054729	135054935	ENSG00000151650	0	ENSG00000151650	0.84442	0.844199	promoter	135055433	+	0.84442	VENTX	1	12	2	2	0	0	0	1	2	3	1	0	0
10	135054964	135055489	ENSG00000151650	0	ENSG00000151650	0.896354	0.896133	promoter	135055433	+	0.896354	VENTX	7	53	13	4	2	5	0	10	15	1	5	4	13
10	135071404	135072028	ENSG00000151651	3878	ENSG00000151651	3878	4478	distal	135090372	-	3878	ADAM8	26	84	11	13	9	10	11	27	26	11	12	9	27
10	135072750	135073063	ENSG00000151651	2843	ENSG00000151651	2843	3443	distal	135090372	-	2843	ADAM8	49	53	17	24	16	20	26	43	56	30	31	11	22
10	135074796	135075167	ENSG00000151651	739	ENSG00000151651	739	1339	distal	135090372	-	739	ADAM8	27	64	17	28	18	11	31	25	33	21	19	5	35
10	135088302	135088969	ENSG00000151651	0	ENSG00000151651	0.580971	0.126316	promoter	135090372	-	0.580971	ADAM8	73	264	40	73	41	61	76	83	93	94	89	46	160
10	135089081	135089302	ENSG00000151651	0	ENSG00000151651	0.362335	0.0466507	promoter	135090372	-	0.362335	ADAM8	7	39	8	8	6	3	11	8	18	10	9	2	18
10	135121255	135121944	ENSG00000130640	0	ENSG00000130640	0.153491	-34	promoter	135122352	-	0.153491	TUBGCP2	35	119	45	28	23	50	39	47	45	48	56	7	30
10	135122572	135123030	ENSG00000130640	0	ENSG00000130640	0.00680483	0	promoter	135122638	-	0.00680483	TUBGCP2	12	54	13	15	5	11	15	13	19	43	33	8	35
10	135127459	135127995	ENSG00000198546	0	ENSG00000198546	0.105406	-1617	promoter	135166033	+	0.105406	ZNF511	16	27	11	54	32	41	46	27	46	52	53	46	37
10	135132123	135132462	ENSG00000198546	0	ENSG00000198546	0.213572	5113	distal	135166033	+	0.213572	ZNF511	6	39	9	7	9	8	11	15	12	11	13	11	14
10	135134643	135134866	ENSG00000198546	0	ENSG00000198546	0.272015	2709	distal	135166033	+	0.272015	ZNF511	11	20	5	3	5	4	9	6	7	4	11	7	6
10	135138054	135138240	ENSG00000270235	0	ENSG00000270235	0.289747	0.0118871	promoter	135138249	-	0.289747	RP11-122K13.14	9	23	1	7	3	5	4	4	3	10	5	2	17
10	135141131	135141665	ENSG00000130643	0	ENSG00000130643	0.978825	-1312	promoter	135150376	-	0.978825	CALY	1	73	10	2	2	2	4	1	3	5	7	4	3
10	135143329	135143680	ENSG00000130643	0	ENSG00000130643	0.746109	-3510	distal	135150376	-	0.746109	CALY	14	52	15	18	15	10	13	14	18	16	20	15	29
10	135170708	135171002	ENSG00000148803	0	ENSG00000148803	0.300293	-207	promoter	135171529	-	0.300293	FUOM	7	34	5	9	5	8	1	6	8	5	16	7	7
10	135171197	135171477	ENSG00000148803	0	ENSG00000148803	0.121434	0	promoter	135171529	-	0.121434	FUOM	5	21	10	6	2	1	1	5	11	10	10	6	22
10	135186715	135187086	ENSG00000127884	0	ENSG00000127884	0.0426443	0.00945669	promoter	135187193	-	0.0426443	ECHS1	17	80	17	16	6	17	15	9	16	22	20	6	38
10	135187308	135187569	ENSG00000127884	-114	ENSG00000127884	-114	-114	promoter	135187193	-	-114	ECHS1	6	40	8	6	2	2	4	9	15	7	6	4	11
10	135191975	135192291	ENSG00000148832	-403	ENSG00000148832	-403	-403	promoter	135205195	+	-403	PAOX	6	26	8	10	4	11	13	9	19	3	7	2	10
10	135192777	135193396	ENSG00000268882	0	ENSG00000268882	0.850785	0	promoter	135193102	-	0.850785	AL360181.1	20	71	14	20	5	16	12	18	23	13	15	12	29
10	135202363	135202874	ENSG00000148832	0	ENSG00000148832	0.766974	-1463	promoter	135205198	+	0.766974	PAOX	55	177	39	41	26	32	32	37	56	42	50	25	84
10	135203481	135203965	ENSG00000148832	0	ENSG00000148832	0.858869	-372	promoter	135205198	+	0.858869	PAOX	35	176	41	24	20	27	42	36	52	29	37	12	52
10	135204016	135204299	ENSG00000148832	0	ENSG00000148832	0.902844	-38	promoter	135205198	+	0.902844	PAOX	24	40	14	9	3	5	5	28	40	19	20	5	19
10	135207568	135207944	ENSG00000148824	0	ENSG00000148824	-0.00796342	0	promoter	135234022	+	-0.00796342	MTG1	28	123	21	20	9	20	28	16	32	23	23	5	64
10	135214176	135215281	ENSG00000148824	0	ENSG00000148824	-0.530367	0	promoter	135216343	+	-0.530367	MTG1	96	440	85	40	26	19	81	66	119	88	75	36	113
10	135219379	135219844	ENSG00000148824	0	ENSG00000148824	0.442065	3035	distal	135234022	+	0.442065	MTG1	21	60	19	15	9	13	25	38	27	32	34	8	49
10	135251369	135251636	ENSG00000203772	0	ENSG00000203772	0.884379	-6546	distal	135382916	-	0.884379	SPRN	7	6	5	3	6	1	8	4	7	6	4	8	23
10	135251714	135251951	ENSG00000203772	0	ENSG00000203772	0.88206	-6891	distal	135382916	-	0.88206	SPRN	2	10	4	0	0	0	1	2	0	3	0	2	1
10	13525200	13525591	ENSG00000165626	0	ENSG00000165626	0.320588	-2126	promoter	13544945	-	0.320588	BEND7	5	2	1	2	0	1	3	3	4	4	0	32	3
10	135303586	135304071	ENSG00000203772	0	ENSG00000203772	0.533329	6983	distal	135382916	-	0.533329	SPRN	8	19	5	13	4	2	4	6	8	5	7	4	40
10	135333683	135334141	ENSG00000203772	0	ENSG00000203772	0.330989	0	promoter	135382916	-	0.330989	SPRN	25	76	17	20	15	19	14	18	15	22	31	9	39
10	135378959	135379338	ENSG00000171772	0	ENSG00000171772	0.0165894	0	promoter	135379138	-	0.0165894	SYCE1	32	0	2	2	0	0	1	0	0	0	1	2	0
10	135422449	135422614	ENSG00000225899	14784	ENSG00000225899	14784	14784	distal	135440296	-	14784	FRG2B	14	11	2	5	7	2	3	0	3	7	10	4	7
10	135428173	135428648	ENSG00000225899	8750	ENSG00000225899	8750	8750	distal	135440296	-	8750	FRG2B	67	0	3	50	33	7	1	0	0	3	6	25	14
10	135436135	135436330	ENSG00000225899	1068	ENSG00000225899	1068	1068	distal	135440296	-	1068	FRG2B	18	13	1	0	0	6	2	1	1	5	3	5	10
10	135450830	135451467	ENSG00000213543	0	ENSG00000213543	1.16942	0	promoter	135451396	-	1.16942	RARRES2P2	4	60	4	6	1	4	11	6	8	11	8	8	17
10	135460731	135461285	ENSG00000233435	4332	ENSG00000233435	4332	4332	distal	135456398	+	4332	AGGF1P2	50	125	39	54	39	43	54	40	61	76	42	37	94
10	135462582	135462926	ENSG00000233435	6183	ENSG00000233435	6183	6183	distal	135456398	+	6183	AGGF1P2	29	52	12	1	2	1	42	4	5	16	9	18	36
10	135523204	135523461	ENSG00000213147	7179	ENSG00000213147	7179	7179	distal	135516024	+	7179	RPL23AP60	12	42	11	9	14	7	10	9	11	6	16	7	21
10	135524492	135524859	ENSG00000213147	8467	ENSG00000213147	8467	8467	distal	135516024	+	8467	RPL23AP60	41	50	17	24	17	24	15	48	15	11	35	32	98
10	13628582	13629224	ENSG00000165630	0	ENSG00000165630	-0.0156377	0	promoter	13653652	+	-0.0156377	PRPF18	62	133	42	41	41	75	78	45	52	54	56	18	78
10	13650455	13650739	ENSG00000165630	0	ENSG00000165630	0.870483	-1307	promoter	13653652	+	0.870483	PRPF18	1	17	7	1	2	1	11	6	6	6	1	1	24
10	13701906	13702112	ENSG00000151474	0	ENSG00000151474	0.988203	-2782	distal	14372101	-	0.988203	FRMD4A	4	2	4	5	6	3	4	15	12	5	11	9	15
10	13728470	13728779	ENSG00000151474	0	ENSG00000151474	0.933868	1595	distal	14014369	-	0.933868	FRMD4A	4	0	1	3	1	0	1	14	24	4	2	3	1
10	13749530	13749757	ENSG00000151474	0	ENSG00000151474	0.00272379	0	promoter	13749567	-	0.00272379	FRMD4A	1	1	2	4	5	1	2	11	21	5	4	4	6
10	13754635	13755660	ENSG00000151474	0	ENSG00000151474	0.939866	580	distal	14050532	-	0.939866	FRMD4A	18	3	0	43	37	10	4	109	160	28	34	22	27
10	13788808	13789187	ENSG00000151474	0	ENSG00000151474	0.831321	0.649737	promoter	14050532	-	0.831321	FRMD4A	1	1	1	1	0	2	0	26	37	3	9	6	10
10	13829070	13829317	ENSG00000151474	0	ENSG00000151474	0.703436	30869	distal	14050532	-	0.703436	FRMD4A	7	1	4	4	5	5	11	16	12	10	11	1	6
10	13876780	13876977	ENSG00000151474	0	ENSG00000151474	0.551893	0.111214	promoter	14050532	-	0.551893	FRMD4A	0	1	0	0	2	0	0	3	9	4	2	2	1
10	14029621	14029856	ENSG00000151474	0	ENSG00000151474	0.0664202	-3958	distal	14050532	-	0.0664202	FRMD4A	2	0	0	2	2	1	1	8	9	4	5	0	4
10	14050340	14050530	ENSG00000151474	0	ENSG00000151474	0.000609855	3.17633e-06	promoter	14050532	-	0.000609855	FRMD4A	0	0	1	1	0	1	4	5	9	1	1	0	3
10	14066523	14066719	ENSG00000151474	0	ENSG00000151474	0.450575	-15990	distal	14372101	-	0.450575	FRMD4A	2	1	1	1	1	2	1	3	11	2	3	2	3
10	14066813	14067003	ENSG00000151474	0	ENSG00000151474	0.450147	-16280	distal	14372101	-	0.450147	FRMD4A	1	0	0	1	2	0	1	3	6	4	4	2	4
10	14083227	14083607	ENSG00000151474	0	ENSG00000151474	0.425945	-32675	distal	14372101	-	0.425945	FRMD4A	3	0	1	1	8	1	5	9	18	9	8	3	4
10	1411092	1411315	ENSG00000185736	0	ENSG00000185736	0.668202	-7259	distal	1779670	-	0.668202	ADARB2	5	1	1	0	0	5	17	2	3	1	2	3	2
10	14215402	14216350	ENSG00000151474	0	ENSG00000151474	0.761422	85797	distal	14504093	-	0.761422	FRMD4A	3	5	4	13	14	3	2	50	69	17	29	4	14
10	14226691	14228203	ENSG00000151474	0	ENSG00000151474	0.731648	97086	distal	14504093	-	0.731648	FRMD4A	65	103	26	46	42	19	39	244	380	136	124	64	172
10	14239136	14239287	ENSG00000151474	0	ENSG00000151474	0.698824	109531	distal	14504093	-	0.698824	FRMD4A	6	0	0	5	4	3	9	6	2	4	6	2	4
10	14540996	14541361	ENSG00000065809	19194	ENSG00000065809	19194	21733	distal	14590669	-	19194	FAM107B	8	38	12	12	21	9	15	11	19	16	23	13	28
10	14549280	14549456	ENSG00000065809	11099	ENSG00000065809	11099	13638	distal	14590669	-	11099	FAM107B	4	16	7	1	4	1	0	1	0	2	3	2	2
10	14569248	14569490	ENSG00000065809	0	ENSG00000065809	0.894104	-5023	distal	14614031	-	0.894104	FAM107B	3	0	1	2	1	4	2	2	2	25	21	3	0
10	14585195	14585941	ENSG00000065809	0	ENSG00000065809	0.774947	0.170484	promoter	14614154	-	0.774947	FAM107B	6	60	19	5	1	4	5	18	12	27	20	14	10
10	14595536	14595741	ENSG00000065809	0	ENSG00000065809	0.49822	-82	promoter	14614154	-	0.49822	FAM107B	4	40	11	3	2	0	2	8	6	30	23	5	7
10	14596846	14597085	ENSG00000065809	0	ENSG00000065809	0.463165	-617	promoter	14614154	-	0.463165	FAM107B	15	30	12	4	7	3	5	2	13	41	36	13	7
10	14597971	14598809	ENSG00000065809	0	ENSG00000065809	0.433059	0	promoter	14614154	-	0.433059	FAM107B	14	155	44	30	35	5	10	24	36	70	65	30	7
10	14603483	14603691	ENSG00000065809	0	ENSG00000065809	0.285558	-5069	distal	14614154	-	0.285558	FAM107B	4	35	7	5	2	2	0	5	5	9	11	4	8
10	14605602	14605875	ENSG00000065809	0	ENSG00000065809	0.228853	-7188	distal	14614154	-	0.228853	FAM107B	8	40	5	8	3	0	1	11	10	39	39	8	22
10	14606400	14606759	ENSG00000065809	0	ENSG00000065809	0.207498	0.172153	promoter	14614154	-	0.207498	FAM107B	5	44	10	7	8	2	6	29	30	46	48	17	17
10	14613876	14614448	ENSG00000065809	0	ENSG00000065809	0.00743932	0	promoter	14614154	-	0.00743932	FAM107B	21	121	15	6	12	5	3	10	9	76	67	26	11
10	14625303	14625694	ENSG00000065809	0	ENSG00000065809	0.280752	-10964	distal	14646294	-	0.280752	FAM107B	1	179	34	7	12	1	2	9	15	12	18	13	5
10	14626769	14627072	ENSG00000065809	0	ENSG00000065809	0.261145	-12430	distal	14646294	-	0.261145	FAM107B	17	40	12	2	8	3	1	13	14	17	24	8	30
10	14628932	14629145	ENSG00000065809	0	ENSG00000065809	0.232215	-14593	distal	14646294	-	0.232215	FAM107B	2	32	8	4	4	4	5	5	3	15	19	24	2
10	14629955	14630407	ENSG00000065809	0	ENSG00000065809	0.218532	-15616	distal	14646294	-	0.218532	FAM107B	4	111	30	11	11	5	4	12	20	51	33	9	4
10	14644000	14644522	ENSG00000065809	0	ENSG00000065809	1.25152	0.963045	promoter	14646269	-	1.25152	FAM107B	55	214	55	22	25	5	18	21	46	76	77	36	75
10	14647214	14647784	ENSG00000065809	0	ENSG00000065809	0.0809145	-796	promoter	14654551	-	0.0809145	FAM107B	42	69	21	41	32	22	24	39	93	99	87	39	91
10	14689649	14690819	ENSG00000065809	0	ENSG00000065809	0.49864	-3921	distal	14816704	-	0.49864	FAM107B	179	559	141	127	94	20	16	228	342	306	271	132	368
10	14700396	14700614	ENSG00000065809	0	ENSG00000065809	0.456462	4779	distal	14816704	-	0.456462	FAM107B	9	13	4	13	7	3	2	20	42	7	8	5	1
10	14701458	14702280	ENSG00000065809	0	ENSG00000065809	0.452295	3113	distal	14816704	-	0.452295	FAM107B	74	454	115	59	72	10	5	113	201	67	57	34	111
10	14740553	14740939	ENSG00000065809	0	ENSG00000065809	0.298862	24230	distal	14816704	-	0.298862	FAM107B	1	19	5	11	16	1	2	19	27	4	4	6	5
10	14782711	14783167	ENSG00000065809	0	ENSG00000065809	0.133409	-16656	distal	14816704	-	0.133409	FAM107B	21	27	6	16	10	2	0	12	31	20	25	20	11
10	14784696	14785112	ENSG00000065809	0	ENSG00000065809	0.125619	-18641	distal	14816704	-	0.125619	FAM107B	7	42	3	13	4	1	0	10	23	12	6	24	13
10	14790559	14790752	ENSG00000065809	0	ENSG00000065809	0.102609	-24504	distal	14816704	-	0.102609	FAM107B	1	3	0	0	0	0	1	11	5	0	0	3	0
10	14851330	14851627	ENSG00000185267	9621	ENSG00000185267	9621	10256	distal	14880574	-	9621	CDNF	3	3	1	3	0	1	3	0	0	14	25	5	1
10	14854271	14854707	ENSG00000185267	6541	ENSG00000185267	6541	7176	distal	14880574	-	6541	CDNF	5	6	1	1	2	2	1	3	3	5	2	3	108
10	14872910	14873140	ENSG00000185267	0	ENSG00000185267	0.39581	-2705	distal	14880071	-	0.39581	CDNF	3	12	4	1	3	0	2	3	9	7	6	5	3
10	14879679	14880559	ENSG00000185267	0	ENSG00000185267	0.021667	0	promoter	14880071	-	0.021667	CDNF	126	429	95	128	92	130	166	119	197	144	144	52	230
10	14915321	14915506	ENSG00000187522	1580	ENSG00000187522	1580	4180	distal	14913740	+	1580	HSPA14	2	0	3	4	2	1	13	2	3	6	5	1	1
10	14919936	14920933	ENSG00000272853	0	ENSG00000272853	0.750501	0	promoter	14920685	-	0.750501	RP11-398C13.6	38	175	41	60	50	89	66	41	71	49	51	18	86
10	14946235	14946523	ENSG00000152457	0	ENSG00000152457	0.879505	4645	distal	14996431	-	0.879505	DCLRE1C	4	12	12	3	7	4	16	12	13	14	18	6	8
10	14968641	14969217	ENSG00000152457	0	ENSG00000152457	0.171788	0.101984	promoter	14970061	-	0.171788	DCLRE1C	7	5	4	22	16	9	0	26	48	68	67	39	14
10	14984100	14984577	ENSG00000152457	0	ENSG00000152457	0.617641	0.584428	promoter	14996018	-	0.617641	DCLRE1C	18	55	14	20	7	10	8	6	16	34	25	18	39
10	14995347	14996623	ENSG00000152457	0	ENSG00000152457	0.034774	0	promoter	14996018	-	0.034774	DCLRE1C	128	566	114	112	70	50	172	86	155	146	120	55	227
10	15001230	15002381	ENSG00000197889	0	ENSG00000197889	-0.0211829	0	promoter	15014680	+	-0.0211829	MEIG1	116	248	58	121	73	96	132	106	128	85	100	56	183
10	15033422	15033774	ENSG00000197889	3372	ENSG00000197889	3372	-3907	distal	15030049	+	3372	MEIG1	21	16	7	18	14	11	53	8	18	32	37	8	62
10	15035586	15035972	ENSG00000228547	5076	ENSG00000228547	5076	-6071	distal	15042054	-	5076	OR7E26P	15	21	7	10	6	7	26	1	2	26	21	4	16
10	15055668	15055949	ENSG00000237470	1121	ENSG00000237470	1121	-4784	distal	15130775	-	1121	DCLRE1CP1	5	10	4	7	7	8	6	11	18	2	12	9	3
10	15087484	15087722	ENSG00000237470	0	ENSG00000237470	0.587363	0.0508883	promoter	15130775	-	0.587363	DCLRE1CP1	2	0	0	1	2	0	0	1	1	23	20	1	9
10	151126	151431	ENSG00000232420	-18920	ENSG00000232420	-18920	-18920	distal	132205	-	-18920	IL9RP2	3	2	1	14	14	3	4	0	1	1	3	3	5
10	15126596	15126967	ENSG00000176244	0	ENSG00000176244	0.388633	0.351411	promoter	15130480	-	0.388633	ACBD7	2	9	3	3	1	3	6	16	14	1	4	3	90
10	15130533	15131106	ENSG00000176244	0	ENSG00000176244	0.0215054	0	promoter	15130775	-	0.0215054	ACBD7	18	71	13	35	12	26	30	15	28	29	35	7	64
10	15138632	15139427	ENSG00000176236	0	ENSG00000176236	0.354705	0	promoter	15139318	-	0.354705	C10orf111	66	207	38	72	58	107	116	55	77	72	88	39	120
10	15139530	15140056	ENSG00000152464	0	ENSG00000152464	0.0173438	0.0171875	promoter	15145819	+	0.0173438	RPP38	33	106	33	44	20	53	45	23	45	32	55	22	38
10	15148422	15148842	ENSG00000152465	0	ENSG00000152465	0.996157	0.411927	promoter	15161384	-	0.996157	NMT2	18	28	10	21	14	10	34	11	18	17	18	9	8
10	15164586	15165197	ENSG00000152465	0	ENSG00000152465	0.772727	-3201	distal	15210445	-	0.772727	NMT2	40	130	36	31	29	62	64	33	73	87	82	31	118
10	15209308	15210117	ENSG00000152465	0	ENSG00000152465	0.0191585	0.00550997	promoter	15210445	-	0.0191585	NMT2	14	79	14	21	30	34	51	31	43	49	60	12	30
10	15210417	15210714	ENSG00000152465	0	ENSG00000152465	0.000471801	0	promoter	15210445	-	0.000471801	NMT2	11	40	6	21	8	17	18	14	18	11	14	7	32
10	15210823	15211287	ENSG00000152465	-130	ENSG00000152465	-130	-130	promoter	15210692	-	-130	NMT2	23	68	13	32	15	29	31	24	37	41	56	27	44
10	15238080	15238405	ENSG00000148468	15236	ENSG00000148468	15236	-24802	distal	15413058	-	15236	FAM171A1	0	5	3	2	1	2	37	2	7	2	4	3	1
10	15250188	15250561	ENSG00000148468	3080	ENSG00000148468	3080	-28929	distal	15413058	-	3080	FAM171A1	2	36	11	1	5	2	3	14	17	5	7	2	4
10	15250853	15251300	ENSG00000148468	2341	ENSG00000148468	2341	-28190	distal	15413058	-	2341	FAM171A1	15	113	22	13	10	20	37	27	35	35	40	2	36
10	15251840	15252193	ENSG00000148468	1448	ENSG00000148468	1448	-27297	distal	15413058	-	1448	FAM171A1	16	21	7	16	15	14	35	22	22	13	6	4	15
10	15416108	15416424	ENSG00000148468	-3046	ENSG00000148468	-3046	-3046	distal	15413061	-	-3046	FAM171A1	5	0	2	7	1	0	7	3	3	38	42	3	2
10	15461325	15461653	ENSG00000148468	-48263	ENSG00000148468	-48263	-48263	distal	15413061	-	-48263	FAM171A1	6	4	6	12	14	11	15	6	8	8	17	5	12
10	15476025	15476490	ENSG00000148468	-62963	ENSG00000148468	-62963	-62963	distal	15413061	-	-62963	FAM171A1	13	13	5	13	14	13	27	13	16	17	24	7	21
10	15546295	15546573	ENSG00000077943	9374	ENSG00000077943	9374	91938	distal	15762124	-	9374	ITGA8	3	8	1	5	0	1	5	14	14	17	16	2	0
10	15627221	15627726	ENSG00000077943	0	ENSG00000077943	0.65431	10785	distal	15762124	-	0.65431	ITGA8	23	45	8	44	29	24	59	16	28	21	26	24	50
10	15669831	15669982	ENSG00000077943	0	ENSG00000077943	0.499862	0.495205	promoter	15686144	-	0.499862	ITGA8	2	0	2	3	1	0	10	2	0	7	6	2	1
10	15693100	15693317	ENSG00000077943	0	ENSG00000077943	0.334782	-6955	distal	15762124	-	0.334782	ITGA8	0	22	5	4	5	3	5	4	0	7	6	3	2
10	15698966	15699173	ENSG00000077943	0	ENSG00000077943	0.306331	-12821	distal	15762124	-	0.306331	ITGA8	2	5	0	0	3	2	3	1	0	19	24	1	5
10	15726820	15727236	ENSG00000077943	0	ENSG00000077943	0.171232	0.16921	promoter	15762124	-	0.171232	ITGA8	10	4	3	25	14	1	12	15	22	31	35	7	14
10	15731592	15731812	ENSG00000077943	0	ENSG00000077943	0.148087	0.147015	promoter	15762124	-	0.148087	ITGA8	4	0	1	23	11	6	14	7	7	14	14	0	2
10	15745175	15745851	ENSG00000077943	0	ENSG00000077943	0.0822065	0.0789229	promoter	15762124	-	0.0822065	ITGA8	35	63	8	20	20	5	24	6	6	93	95	10	59
10	15746487	15746873	ENSG00000077943	0	ENSG00000077943	0.075843	0.0739659	promoter	15762124	-	0.075843	ITGA8	8	9	5	16	11	0	37	9	3	62	54	0	34
10	15755168	15755319	ENSG00000077943	0	ENSG00000077943	0.0337382	0.0330009	promoter	15762124	-	0.0337382	ITGA8	1	2	0	7	3	0	20	1	0	17	13	2	3
10	15760977	15761413	ENSG00000077943	0	ENSG00000077943	0.00556321	0.00344366	promoter	15762124	-	0.00556321	ITGA8	27	53	8	38	23	29	30	14	36	25	27	9	60
10	15761956	15762501	ENSG00000077943	0	ENSG00000077943	0.000814838	0	promoter	15762124	-	0.000814838	ITGA8	60	84	25	54	65	49	86	51	74	87	70	18	116
10	15767576	15767905	ENSG00000077943	-5451	ENSG00000077943	-5451	-5451	distal	15762124	-	-5451	ITGA8	5	2	2	26	17	2	12	4	4	13	16	5	13
10	15786255	15786579	ENSG00000077943	-24130	ENSG00000077943	-24130	-24130	distal	15762124	-	-24130	ITGA8	11	28	7	15	12	6	28	7	9	8	14	5	22
10	15790058	15790649	ENSG00000077943	-27933	ENSG00000077943	-27933	-27933	distal	15762124	-	-27933	ITGA8	13	10	1	53	43	36	27	19	23	19	13	6	28
10	15829186	15829905	ENSG00000148481	0	ENSG00000148481	0.890504	-4851	distal	15902519	-	0.890504	FAM188A	130	680	130	235	166	261	275	90	126	236	170	74	247
10	15831859	15832600	ENSG00000148481	0	ENSG00000148481	0.978709	-7524	distal	15879298	-	0.978709	FAM188A	25	216	38	49	33	116	105	88	145	113	86	25	44
10	15837096	15837680	ENSG00000148481	0	ENSG00000148481	0.870665	-12761	distal	15879298	-	0.870665	FAM188A	12	83	13	29	12	82	24	8	9	34	38	6	22
10	15844383	15844621	ENSG00000148481	0	ENSG00000148481	0.85142	0.386189	promoter	15880278	-	0.85142	FAM188A	1	0	0	5	3	2	1	2	0	16	10	1	1
10	15859536	15859838	ENSG00000148481	0	ENSG00000148481	0.491995	0.00421708	promoter	15880278	-	0.491995	FAM188A	8	41	8	15	12	20	18	7	8	31	19	10	4
10	15863293	15863685	ENSG00000148481	0	ENSG00000148481	0.40288	-3285	distal	15880278	-	0.40288	FAM188A	15	85	14	6	4	15	20	5	18	17	23	7	19
10	15866543	15866733	ENSG00000148481	0	ENSG00000148481	0.32579	-6535	distal	15880278	-	0.32579	FAM188A	1	9	8	5	3	7	15	6	11	7	15	5	11
10	15873161	15873817	ENSG00000148481	0	ENSG00000148481	0.168813	0.113057	promoter	15880278	-	0.168813	FAM188A	20	162	38	13	11	7	20	15	13	26	33	10	14
10	15901705	15902843	ENSG00000148481	0	ENSG00000148481	0.00988464	0	promoter	15902519	-	0.00988464	FAM188A	58	189	41	70	30	78	82	37	45	76	59	32	84
10	15940268	15940469	ENSG00000239130	11803	ENSG00000239130	11803	11803	distal	15928464	+	11803	snoU13	6	8	5	14	5	7	8	2	8	5	11	4	7
10	15944705	15944850	ENSG00000239130	16240	ENSG00000239130	16240	16240	distal	15928464	+	16240	snoU13	10	14	10	11	6	7	10	6	9	11	21	11	12
10	16423158	16423593	ENSG00000238552	17060	ENSG00000238552	17060	17060	distal	16440758	-	17060	snoU13	5	14	9	18	7	12	27	12	15	27	32	7	9
10	16454235	16454624	ENSG00000238552	-13476	ENSG00000238552	-13476	-13476	distal	16440758	-	-13476	snoU13	4	6	3	11	7	16	15	11	23	25	17	4	32
10	16478441	16479384	ENSG00000165983	0	ENSG00000165983	-0.00706161	0	promoter	16555736	+	-0.00706161	PTER	115	328	56	127	90	132	150	92	158	90	90	50	190
10	16612816	16612989	ENSG00000148484	19620	ENSG00000148484	19620	-48811	distal	16859382	-	19620	RSU1	5	11	2	5	3	3	5	5	4	2	3	4	2
10	16812726	16813095	ENSG00000148484	0	ENSG00000148484	0.208503	-22349	distal	16859462	-	0.208503	RSU1	22	35	14	7	4	11	2	6	11	5	7	4	13
10	16821438	16821835	ENSG00000148484	0	ENSG00000148484	0.169636	-31061	distal	16859462	-	0.169636	RSU1	8	23	6	8	1	4	20	4	5	1	11	5	16
10	16859080	16860008	ENSG00000148484	0	ENSG00000148484	0.00170422	0	promoter	16859462	-	0.00170422	RSU1	222	680	156	210	191	249	247	211	276	251	249	132	367
10	16869913	16870519	ENSG00000107611	0	ENSG00000107611	0.987086	-10385	distal	17171830	-	0.987086	CUBN	22	28	13	33	37	80	91	11	15	25	35	24	23
10	16885347	16885683	ENSG00000107611	0	ENSG00000107611	0.936626	-25819	distal	17171830	-	0.936626	CUBN	7	12	4	5	13	14	35	4	9	10	22	12	21
10	16896488	16896814	ENSG00000107611	0	ENSG00000107611	0.900202	-36960	distal	17171830	-	0.900202	CUBN	3	3	5	8	6	12	42	8	8	5	7	2	4
10	16933411	16934238	ENSG00000107611	0	ENSG00000107611	0.779486	-73883	distal	17171830	-	0.779486	CUBN	64	22	9	29	27	39	115	66	137	43	34	24	78
10	16984389	16984698	ENSG00000107611	0	ENSG00000107611	0.612819	22940	distal	17171830	-	0.612819	CUBN	18	2	0	8	4	23	19	16	17	10	6	3	7
10	16985984	16986240	ENSG00000107611	0	ENSG00000107611	0.607604	21398	distal	17171830	-	0.607604	CUBN	8	1	0	3	1	11	4	1	0	23	16	2	16
10	17043429	17043671	ENSG00000107611	0	ENSG00000107611	0.419794	-17234	distal	17171830	-	0.419794	CUBN	9	2	0	10	12	9	32	17	16	5	13	2	8
10	17043944	17044700	ENSG00000107611	0	ENSG00000107611	0.41811	-17749	distal	17171830	-	0.41811	CUBN	59	1	2	82	66	165	120	87	161	89	84	28	153
10	17045126	17045469	ENSG00000107611	0	ENSG00000107611	0.414245	-18931	distal	17171830	-	0.414245	CUBN	18	1	0	27	29	15	4	49	73	37	45	7	19
10	17061540	17062065	ENSG00000107611	0	ENSG00000107611	0.360582	-35345	distal	17171830	-	0.360582	CUBN	39	5	5	52	41	100	58	25	30	54	39	13	73
10	17065424	17066050	ENSG00000107611	0	ENSG00000107611	0.347883	-39229	distal	17171830	-	0.347883	CUBN	103	47	18	94	87	167	141	110	151	134	117	30	229
10	17067600	17067850	ENSG00000107611	0	ENSG00000107611	0.340769	-41405	distal	17171830	-	0.340769	CUBN	14	3	4	25	27	56	15	19	23	16	12	6	17
10	17068851	17069223	ENSG00000107611	0	ENSG00000107611	0.336679	-42656	distal	17171830	-	0.336679	CUBN	35	23	5	62	54	56	27	32	40	46	53	10	82
10	17071538	17071971	ENSG00000107611	0	ENSG00000107611	0.327894	-45343	distal	17171830	-	0.327894	CUBN	27	9	3	29	34	63	54	23	26	18	23	13	38
10	17091067	17091624	ENSG00000107611	0	ENSG00000107611	0.264046	-64872	distal	17171830	-	0.264046	CUBN	27	0	2	6	6	64	59	25	55	45	55	7	13
10	17117527	17117864	ENSG00000107611	0	ENSG00000107611	0.177538	46016	distal	17171830	-	0.177538	CUBN	3	5	1	7	14	11	31	7	17	22	21	10	5
10	17151560	17151775	ENSG00000107611	0	ENSG00000107611	0.0662706	12105	distal	17171830	-	0.0662706	CUBN	5	15	2	9	7	9	14	11	5	7	2	5	23
10	17165161	17165316	ENSG00000107611	0	ENSG00000107611	0.785055	0.758858	promoter	17169836	-	0.785055	CUBN	2	1	0	1	0	1	10	1	0	0	1	0	1
10	17165489	17165681	ENSG00000107611	0	ENSG00000107611	0.987643	0.697565	promoter	17171803	-	0.987643	CUBN	1	1	3	1	1	3	11	2	3	2	4	2	0
10	17186608	17187271	ENSG00000107614	0	ENSG00000107614	0.960366	-7023	distal	17243671	-	0.960366	TRDMT1	51	60	9	31	24	54	79	59	81	87	95	24	91
10	17220942	17221371	ENSG00000107614	0	ENSG00000107614	0.766636	-4282	distal	17244053	-	0.766636	TRDMT1	3	90	16	1	2	9	1	10	25	7	8	2	11
10	17225692	17225862	ENSG00000107614	0	ENSG00000107614	0.609069	-9032	distal	17244053	-	0.609069	TRDMT1	3	7	1	4	3	4	18	3	3	1	1	5	8
10	17242409	17243201	ENSG00000107614	0	ENSG00000107614	0.0545346	0	promoter	17244053	-	0.0545346	TRDMT1	36	37	9	42	33	69	37	44	49	54	44	21	53
10	17243218	17243748	ENSG00000107614	0	ENSG00000107614	0.0276985	0	promoter	17244053	-	0.0276985	TRDMT1	66	80	19	69	44	58	64	43	73	47	43	16	87
10	17248080	17248681	ENSG00000107614	-4026	ENSG00000107614	-4026	-4026	distal	17244053	-	-4026	TRDMT1	11	82	25	38	41	16	76	79	131	111	100	6	19
10	17258205	17258712	ENSG00000229124	0	ENSG00000229124	0.931706	0.804487	promoter	17271984	-	0.931706	VIM-AS1	93	49	18	68	72	61	80	51	77	133	151	14	177
10	17260030	17260181	ENSG00000229124	0	ENSG00000229124	0.808303	0.688443	promoter	17271984	-	0.808303	VIM-AS1	3	2	2	12	5	10	17	7	8	8	15	1	2
10	17269447	17270839	ENSG00000229124	0	ENSG00000229124	0.171546	0	promoter	17271984	-	0.171546	VIM-AS1	182	285	81	218	158	216	209	195	301	222	228	81	311
10	17271009	17271370	ENSG00000229124	0	ENSG00000229124	0.0659274	0	promoter	17271984	-	0.0659274	VIM-AS1	26	82	10	45	31	39	45	50	74	82	80	15	75
10	17272003	17272211	ENSG00000026025	0	ENSG00000026025	0	0	promoter	17279592	+	0	VIM	38	57	7	26	16	14	26	17	26	24	33	10	42
10	17272386	17272845	ENSG00000026025	0	ENSG00000026025	-0.0495979	0	promoter	17277084	+	-0.0495979	VIM	81	96	27	47	38	52	38	29	38	44	51	35	110
10	17280359	17280572	ENSG00000026025	766	ENSG00000026025	766	-3526	distal	17279592	+	766	VIM	0	6	2	7	2	16	12	9	23	20	21	2	2
10	17280574	17281595	ENSG00000026025	981	ENSG00000026025	981	-3741	distal	17279592	+	981	VIM	12	40	13	47	24	65	49	135	144	127	107	12	42
10	17299637	17300078	ENSG00000026025	20044	ENSG00000026025	20044	-22804	distal	17279592	+	20044	VIM	18	10	9	23	14	28	23	16	17	10	24	17	22
10	17315572	17315721	ENSG00000026025	35979	ENSG00000026025	35979	-38739	distal	17279592	+	35979	VIM	6	3	0	3	4	0	5	5	5	3	6	2	13
10	17358521	17358943	ENSG00000148488	1438	ENSG00000148488	1438	1438	distal	17369108	-	1438	ST8SIA6	6	0	1	16	11	18	5	1	9	3	9	4	17
10	17428732	17429068	ENSG00000148488	0	ENSG00000148488	0.502744	0	promoter	17496329	-	0.502744	ST8SIA6	5	35	8	1	3	3	0	2	3	5	3	2	8
10	17470720	17471056	ENSG00000148488	0	ENSG00000148488	0.190464	15217	distal	17496329	-	0.190464	ST8SIA6	7	30	6	8	8	6	9	10	23	7	13	2	18
10	17472939	17473090	ENSG00000148488	0	ENSG00000148488	0.17396	17436	distal	17496329	-	0.17396	ST8SIA6	2	5	4	5	10	13	13	2	2	6	7	1	13
10	17474107	17474296	ENSG00000148488	0	ENSG00000148488	0.165273	0.16386	promoter	17496329	-	0.165273	ST8SIA6	5	4	0	8	8	14	26	5	5	3	6	4	8
10	17552301	17552466	ENSG00000148488	-55971	ENSG00000148488	-55971	-55971	distal	17496329	-	-55971	ST8SIA6	1	18	3	0	2	0	2	2	1	1	4	4	8
10	17553385	17553763	ENSG00000148488	-57055	ENSG00000148488	-57055	-57055	distal	17496329	-	-57055	ST8SIA6	4	26	11	4	5	5	5	4	2	5	8	4	3
10	17649576	17649931	ENSG00000165996	0	ENSG00000165996	0.531799	-3748	distal	17659234	-	0.531799	PTPLA	16	24	8	11	6	12	23	11	11	18	11	14	14
10	17685484	17686784	ENSG00000260589	0	ENSG00000260589	0.151503	0	promoter	17685877	-	0.151503	RP11-390B4.5	137	358	77	131	105	217	141	158	218	161	151	87	191
10	17697508	17698033	ENSG00000136738	0	ENSG00000136738	0.158426	0.158412	promoter	17757237	+	0.158426	STAM	1	34	3	33	15	3	8	9	8	3	7	8	6
10	17724379	17724593	ENSG00000136738	0	ENSG00000136738	0.537035	-2190	promoter	17757237	+	0.537035	STAM	11	29	8	5	4	3	3	11	14	5	6	10	12
10	17726471	17726715	ENSG00000136738	0	ENSG00000136738	0.566511	-68	promoter	17757237	+	0.566511	STAM	3	9	5	5	5	0	1	10	29	2	3	1	5
10	17727330	17727526	ENSG00000136738	0	ENSG00000136738	0.161922	0.161625	promoter	17730156	+	0.161922	STAM	1	22	11	3	10	0	5	15	3	4	3	3	1
10	17784881	17785046	ENSG00000148483	-9204	ENSG00000148483	-9204	-9204	distal	17842867	+	-9204	TMEM236	2	12	5	2	2	4	7	3	4	7	9	4	3
10	17798743	17799332	ENSG00000148483	0	ENSG00000148483	0.0935908	0.0935699	promoter	17842160	+	0.0935908	TMEM236	60	181	53	29	31	24	118	54	72	45	33	21	67
10	17848104	17848282	ENSG00000183748	-3079	ENSG00000183748	-3079	-3079	distal	17896832	+	-3079	MRC1L1	1	11	3	2	6	1	3	1	0	3	1	1	2
10	17889483	17889907	ENSG00000183748	0	ENSG00000183748	0.374411	2289	distal	17953178	+	0.374411	MRC1L1	4	42	11	1	2	3	10	2	3	9	5	3	5
10	17896228	17896678	ENSG00000183748	0	ENSG00000183748	0.440658	9034	distal	17953178	+	0.440658	MRC1L1	1	108	25	1	0	0	1	14	13	2	3	4	3
10	17900729	17900969	ENSG00000183748	0	ENSG00000183748	0.484865	13535	distal	17953178	+	0.484865	MRC1L1	1	80	11	0	1	0	1	17	14	1	3	2	2
10	17901426	17902102	ENSG00000183748	0	ENSG00000183748	0.491711	14232	distal	17953178	+	0.491711	MRC1L1	1	254	50	3	0	1	1	8	11	2	1	5	2
10	17960315	17960826	ENSG00000183748	7136	ENSG00000183748	7136	73121	distal	17953178	+	7136	MRC1L1	0	47	17	2	1	1	3	3	3	1	3	4	4
10	18031884	18032084	ENSG00000184040	-9133	ENSG00000184040	-9133	-9133	distal	18089855	+	-9133	TMEM236	2	14	3	1	9	6	7	1	9	7	9	6	2
10	18045726	18046305	ENSG00000184040	0	ENSG00000184040	0.0938837	0.0938628	promoter	18089148	+	0.0938837	TMEM236	57	171	40	34	20	28	106	52	74	44	44	17	64
10	18095008	18095267	ENSG00000120586	-3084	ENSG00000120586	-3084	-3084	distal	18200091	+	-3084	MRC1	1	22	5	4	6	0	8	7	4	1	6	0	3
10	18143182	18143665	ENSG00000120586	0	ENSG00000120586	0.440637	9059	distal	18200091	+	0.440637	MRC1	1	110	21	0	0	1	3	15	21	1	4	1	3
10	18147669	18147885	ENSG00000120586	0	ENSG00000120586	0.48474	3930	distal	18200091	+	0.48474	MRC1	1	82	6	1	3	2	0	12	13	0	1	3	2
10	18148317	18149001	ENSG00000120586	0	ENSG00000120586	0.49111	2814	distal	18200091	+	0.49111	MRC1	4	261	54	0	1	1	2	7	5	2	9	1	2
10	18207218	18207754	ENSG00000120586	7126	ENSG00000120586	7126	-33013	distal	18200091	+	7126	MRC1	0	58	13	1	1	2	5	2	1	3	4	2	4
10	182098	182481	ENSG00000015171	0	ENSG00000015171	0.00544806	0.00543966	promoter	300574	+	0.00544806	ZMYND11	22	49	11	14	22	19	23	19	21	16	19	13	20
10	18241050	18241402	ENSG00000148482	0	ENSG00000148482	0.00173833	0.00172732	promoter	18331784	+	0.00173833	SLC39A12	1	23	6	5	0	0	1	1	3	3	3	2	7
10	18272971	18273286	ENSG00000148482	0	ENSG00000148482	0.352935	18746	distal	18331784	+	0.352935	SLC39A12	1	25	4	2	2	4	3	4	3	1	4	1	1
10	183125	183290	ENSG00000015171	0	ENSG00000015171	0.0140693	0.0140609	promoter	300574	+	0.0140693	ZMYND11	6	33	5	10	14	5	14	8	15	8	14	3	6
10	18343083	18343265	ENSG00000148482	10861	ENSG00000148482	10861	-43591	distal	18332221	+	10861	SLC39A12	0	12	7	0	1	1	1	1	2	2	2	2	3
10	18503957	18504145	ENSG00000165995	0	ENSG00000165995	0.185294	-45552	distal	18828653	+	0.185294	CACNB2	4	10	5	6	12	9	11	3	4	2	2	5	3
10	18601822	18601976	ENSG00000165995	0	ENSG00000165995	0.184488	-27669	distal	18830056	+	0.184488	CACNB2	9	6	5	6	6	13	14	3	7	5	17	4	7
10	18689755	18689948	ENSG00000165995	0	ENSG00000165995	9.26493e-05	8.55225e-05	promoter	18830056	+	9.26493e-05	CACNB2	2	0	2	1	2	0	12	2	1	0	5	3	1
10	18760790	18761291	ENSG00000165995	0	ENSG00000165995	0.50635	59486	distal	18830056	+	0.50635	CACNB2	6	37	13	27	13	9	28	7	20	10	16	11	29
10	18789927	18790659	ENSG00000165995	0	ENSG00000165995	0.714006	30118	distal	18830056	+	0.714006	CACNB2	14	128	29	75	71	32	52	43	81	43	46	15	99
10	18896439	18897321	ENSG00000241058	0	ENSG00000241058	0.415912	0.407586	promoter	18940551	-	0.415912	NSUN6	16	32	11	39	40	25	62	14	12	12	15	23	21
10	18916417	18917046	ENSG00000241058	0	ENSG00000241058	0.227548	0.221608	promoter	18940551	-	0.227548	NSUN6	33	170	27	109	71	59	71	79	122	22	22	22	42
10	18940294	18941030	ENSG00000152487	0	ENSG00000152487	0.987627	0	promoter	18948196	-	0.987627	ARL5B-AS1	72	211	47	75	59	64	111	63	103	79	71	44	139
10	18947212	18947586	ENSG00000152487	0	ENSG00000152487	0.218336	0.132602	promoter	18948167	-	0.218336	ARL5B-AS1	25	37	17	21	16	20	24	23	52	29	31	15	20
10	18947807	18948510	ENSG00000152487	0	ENSG00000152487	0.0823045	0	promoter	18948167	-	0.0823045	ARL5B-AS1	108	226	55	91	79	77	109	71	117	81	92	35	163
10	18948637	18949395	ENSG00000165997	0	ENSG00000165997	0.0136278	0.0135828	promoter	18970568	+	0.0136278	ARL5B	41	77	32	54	25	47	45	39	72	67	71	40	58
10	19048573	19049329	ENSG00000234244	11790	ENSG00000234244	11790	11790	distal	19036782	+	11790	RP11-139J15.5	3	126	39	29	18	131	53	11	10	23	25	9	6
10	19143270	19143633	ENSG00000234813	-85796	ENSG00000234813	-85796	-85796	distal	19229882	+	-85796	RP11-288D15.1	1	2	0	4	6	13	4	2	0	21	11	3	0
10	19539500	19539820	ENSG00000204740	0	ENSG00000204740	0.0872472	39331	distal	20023405	+	0.0872472	C10orf112	4	20	6	3	1	0	3	9	3	2	5	0	2
10	19591110	19591261	ENSG00000204740	0	ENSG00000204740	0.184595	-10700	distal	20023405	+	0.184595	C10orf112	3	7	1	4	9	8	9	2	5	1	7	3	1
10	19622656	19623253	ENSG00000204740	0	ENSG00000204740	0.244098	-17843	distal	20023405	+	0.244098	C10orf112	2	47	15	25	19	32	14	6	9	6	9	7	5
10	19736760	19736954	ENSG00000204740	0	ENSG00000204740	0.686229	-40569	distal	19780501	+	0.686229	C10orf112	1	1	2	0	1	23	1	1	0	2	3	2	2
10	19738726	19739211	ENSG00000204740	0	ENSG00000204740	0.700331	-38312	distal	19780501	+	0.700331	C10orf112	2	51	12	21	15	43	67	7	13	5	8	5	3
10	19772392	19772704	ENSG00000204740	0	ENSG00000204740	0.941831	-4819	distal	19780501	+	0.941831	C10orf112	1	26	4	12	14	5	2	1	1	2	6	4	1
10	1980555	1980934	ENSG00000234962	66732	ENSG00000234962	66732	73912	distal	2056542	-	66732	LINC00700	6	8	3	0	1	23	0	0	0	6	2	2	1
10	19807613	19808001	ENSG00000204740	0	ENSG00000204740	0.120587	-27384	distal	20023405	+	0.120587	C10orf112	2	30	6	19	19	20	57	13	32	11	11	5	2
10	1981110	1981504	ENSG00000234962	66162	ENSG00000234962	66162	73342	distal	2056542	-	66162	LINC00700	12	14	7	2	1	22	2	1	2	7	6	3	3
10	19821328	19821633	ENSG00000204740	0	ENSG00000204740	0.17648	-41099	distal	20023405	+	0.17648	C10orf112	4	37	13	5	3	5	2	9	9	3	4	1	2
10	19821897	19822477	ENSG00000204740	0	ENSG00000204740	0.178799	-41668	distal	20023405	+	0.178799	C10orf112	9	81	26	10	6	11	9	12	15	13	8	0	7
10	19826197	19826429	ENSG00000204740	0	ENSG00000204740	0.196322	-45968	distal	20023405	+	0.196322	C10orf112	7	9	2	9	6	2	10	6	20	10	6	6	0
10	19927207	19927737	ENSG00000204740	0	ENSG00000204740	0.607966	-4465	distal	20023405	+	0.607966	C10orf112	3	19	9	9	8	13	17	26	33	9	16	5	3
10	20077221	20077372	ENSG00000204740	0	ENSG00000204740	0.9785	-4631	distal	20079330	+	0.9785	C10orf112	0	5	4	6	4	9	12	5	6	9	6	1	1
10	20193151	20193542	ENSG00000120594	0	ENSG00000120594	0.185768	0.185766	promoter	20578785	+	0.185768	PLXDC2	3	0	1	8	6	2	0	14	19	15	14	4	5
10	20235872	20236198	ENSG00000120594	0	ENSG00000120594	0.27597	-96050	distal	20578785	+	0.27597	PLXDC2	3	2	0	15	5	4	1	7	11	8	11	3	4
10	20292637	20293414	ENSG00000120594	0	ENSG00000120594	0.395824	-38834	distal	20578785	+	0.395824	PLXDC2	20	93	22	59	48	32	13	53	90	134	145	7	73
10	20399734	20399933	ENSG00000120594	0	ENSG00000120594	0.284702	-19020	distal	20569286	+	0.284702	PLXDC2	3	0	1	3	2	1	2	3	1	11	4	0	2
10	20820034	20820624	ENSG00000270727	-15475	ENSG00000270727	-15475	-15475	distal	20836351	+	-15475	RP11-51E20.1	3	2	1	2	1	35	1	3	4	3	5	5	5
10	21174664	21174966	ENSG00000078114	0	ENSG00000078114	0.74167	0.379447	promoter	21188620	-	0.74167	NEBL	4	11	5	5	6	2	4	2	0	4	9	17	2
10	21259720	21260001	ENSG00000078114	0	ENSG00000078114	0.348717	-57926	distal	21358946	-	0.348717	NEBL	6	22	0	11	11	11	8	5	3	9	12	7	13
10	21260914	21261117	ENSG00000078114	0	ENSG00000078114	0.344521	-56810	distal	21358946	-	0.344521	NEBL	4	17	3	7	4	14	11	1	6	6	9	13	12
10	21265907	21266423	ENSG00000078114	0	ENSG00000078114	0.326973	-51504	distal	21358946	-	0.326973	NEBL	5	74	15	31	19	21	28	7	7	11	13	18	20
10	21304768	21305064	ENSG00000078114	0	ENSG00000078114	0.190402	-12863	distal	21358946	-	0.190402	NEBL	7	11	3	13	9	2	6	7	6	14	10	10	24
10	21309496	21309743	ENSG00000078114	0	ENSG00000078114	0.173786	-8184	distal	21358946	-	0.173786	NEBL	11	11	3	13	13	11	12	7	4	20	12	15	20
10	21367616	21367767	ENSG00000078114	0	ENSG00000078114	0.244695	-8669	distal	21463116	-	0.244695	NEBL	3	4	0	10	4	8	9	0	1	8	7	3	6
10	21386360	21386707	ENSG00000078114	0	ENSG00000078114	0.196669	-12903	distal	21463116	-	0.196669	NEBL	15	1	0	4	3	1	0	2	1	9	18	2	62
10	21784324	21784797	ENSG00000204682	0	ENSG00000204682	0.405517	693	distal	21786191	-	0.405517	CASC10	12	36	13	11	8	16	10	9	6	3	13	12	18
10	21785633	21785960	ENSG00000204682	0	ENSG00000204682	0.121199	-62	promoter	21786191	-	0.121199	CASC10	5	32	5	11	8	8	14	4	5	6	8	5	4
10	21809012	21809324	ENSG00000180592	0	ENSG00000180592	0.868931	-2163	promoter	21812824	-	0.868931	SKIDA1	14	24	7	16	16	16	11	4	5	3	6	10	20
10	21822462	21822937	ENSG00000078403	-156	ENSG00000078403	-156	-156	promoter	21846111	+	-156	MLLT10	28	54	15	43	37	55	43	41	44	27	29	16	58
10	21823047	21823432	ENSG00000078403	0	ENSG00000078403	-0.00477162	0	promoter	21901380	+	-0.00477162	MLLT10	19	62	19	14	5	39	17	11	16	13	17	7	37
10	21870196	21870708	ENSG00000078403	0	ENSG00000078403	0.767181	-16689	distal	21884313	+	0.767181	MLLT10	17	18	6	46	29	32	24	35	64	4	5	37	27
10	21873836	21874743	ENSG00000078403	0	ENSG00000078403	0.827212	-20329	distal	21884313	+	0.827212	MLLT10	40	167	39	37	43	89	41	47	101	75	76	39	95
10	21880732	21881057	ENSG00000078403	0	ENSG00000078403	0.940942	-27225	distal	21884313	+	0.940942	MLLT10	9	22	7	1	5	4	16	8	8	5	6	4	15
10	21902945	21903301	ENSG00000078403	0	ENSG00000078403	0.379802	10219	distal	22032554	+	0.379802	MLLT10	7	24	9	8	9	5	9	12	13	8	6	15	12
10	21952165	21952368	ENSG00000078403	0	ENSG00000078403	0.144993	-1494	promoter	22019873	+	0.144993	MLLT10	2	2	1	1	2	0	0	5	11	2	4	3	2
10	21976396	21976975	ENSG00000078403	0	ENSG00000078403	0.344264	0.34424	promoter	22002851	+	0.344264	MLLT10	16	1	1	2	2	0	3	7	3	53	59	4	15
10	21991574	21992048	ENSG00000078403	0	ENSG00000078403	0.720479	0.720454	promoter	22002851	+	0.720479	MLLT10	8	41	14	6	3	8	6	8	13	10	16	5	22
10	21997954	21998147	ENSG00000078403	0	ENSG00000078403	0.878619	0.878594	promoter	22002851	+	0.878619	MLLT10	6	36	7	4	2	11	7	3	9	5	6	8	2
10	21999577	22000247	ENSG00000078403	0	ENSG00000078403	0.918848	0.918823	promoter	22002851	+	0.918848	MLLT10	75	236	73	93	83	150	129	90	172	131	152	67	199
10	22013649	22014100	ENSG00000078403	0	ENSG00000078403	0.921404	10797	distal	22019873	+	0.921404	MLLT10	31	77	27	17	13	5	15	27	43	29	36	23	68
10	22021093	22021533	ENSG00000078403	0	ENSG00000078403	0.945157	-52687	distal	22032554	+	0.945157	MLLT10	6	42	13	18	16	15	27	7	12	8	12	12	5
10	22029947	22030101	ENSG00000078403	0	ENSG00000078403	0.987525	-44119	distal	22032554	+	0.987525	MLLT10	2	3	3	3	1	3	2	4	4	11	15	3	0
10	22174988	22175201	ENSG00000136770	0	ENSG00000136770	0.476018	-8075	distal	22292654	-	0.476018	DNAJC1	6	48	7	2	5	11	6	6	6	3	3	4	17
10	22177772	22178280	ENSG00000136770	0	ENSG00000136770	0.464756	-4996	distal	22292654	-	0.464756	DNAJC1	27	134	9	21	13	40	34	17	19	15	30	11	82
10	22178399	22178564	ENSG00000136770	0	ENSG00000136770	0.462219	-4712	distal	22292654	-	0.462219	DNAJC1	1	12	3	1	0	2	6	1	0	5	2	3	2
10	22232453	22232829	ENSG00000136770	0	ENSG00000136770	0.724456	10085	distal	22292698	-	0.724456	DNAJC1	2	28	9	6	4	9	7	3	9	4	3	5	5
10	22242956	22243511	ENSG00000136770	0	ENSG00000136770	0.598155	20588	distal	22292698	-	0.598155	DNAJC1	19	46	12	18	13	37	23	20	16	52	57	35	22
10	22250237	22250438	ENSG00000136770	0	ENSG00000136770	0.5106	27869	distal	22292698	-	0.5106	DNAJC1	3	8	2	9	3	6	3	2	5	3	1	2	1
10	22261528	22261907	ENSG00000136770	0	ENSG00000136770	0.374824	0.364329	promoter	22292698	-	0.374824	DNAJC1	6	46	8	12	6	30	14	13	17	18	17	10	12
10	22278290	22278856	ENSG00000136770	0	ENSG00000136770	0.173258	0.161337	promoter	22292698	-	0.173258	DNAJC1	24	132	31	32	37	56	79	36	48	52	41	49	27
10	22284241	22284686	ENSG00000136770	0	ENSG00000136770	0.101697	0.0915134	promoter	22292698	-	0.101697	DNAJC1	7	119	26	6	6	11	5	7	3	16	22	9	18
10	22291377	22291830	ENSG00000136770	0	ENSG00000136770	0.0158852	0.00595238	promoter	22292698	-	0.0158852	DNAJC1	31	87	23	29	22	43	45	43	68	44	38	16	60
10	22292554	22293274	ENSG00000136770	0	ENSG00000136770	0.00173162	0	promoter	22292698	-	0.00173162	DNAJC1	123	429	76	158	95	108	154	85	129	122	104	73	229
10	22311475	22312160	ENSG00000136770	-18776	ENSG00000136770	-18776	-18776	distal	22292698	-	-18776	DNAJC1	13	65	20	9	9	58	17	18	18	18	21	24	41
10	22331421	22332349	ENSG00000136770	-38722	ENSG00000136770	-38722	-38722	distal	22292698	-	-38722	DNAJC1	3	64	7	6	7	61	2	5	1	16	13	6	4
10	22349985	22350226	ENSG00000136770	-57286	ENSG00000136770	-57286	-57286	distal	22292698	-	-57286	DNAJC1	3	15	2	5	1	1	1	2	1	4	1	1	4
10	22375670	22376326	ENSG00000232497	-75594	ENSG00000232497	-75594	-75594	distal	22454723	+	-75594	ADIPOR1P1	2	56	13	8	8	4	4	3	4	1	4	14	4
10	22392646	22392943	ENSG00000232497	-58977	ENSG00000232497	-58977	-58977	distal	22454723	+	-58977	ADIPOR1P1	5	22	4	11	11	9	4	1	3	3	6	10	5
10	22422777	22423494	ENSG00000232497	-28426	ENSG00000232497	-28426	-28426	distal	22454723	+	-28426	ADIPOR1P1	7	284	61	32	23	26	2	3	10	7	11	37	11
10	22426463	22426740	ENSG00000232497	-25180	ENSG00000232497	-25180	-25180	distal	22454723	+	-25180	ADIPOR1P1	2	61	6	2	2	6	2	3	0	1	3	9	3
10	22511080	22511620	ENSG00000260205	982	ENSG00000260205	982	-3006	distal	22510097	+	982	RP11-108B14.5	9	70	11	25	18	45	25	2	4	11	16	32	16
10	22518195	22518694	ENSG00000227462	3241	ENSG00000227462	3241	3241	distal	22514953	+	3241	RP11-108B14.4	5	65	26	51	34	44	66	13	29	17	23	21	6
10	22519471	22519711	ENSG00000227462	4517	ENSG00000227462	4517	4517	distal	22514953	+	4517	RP11-108B14.4	0	37	5	19	17	16	32	4	9	13	8	13	3
10	22532327	22532872	ENSG00000261671	-13842	ENSG00000261671	-13842	-13842	distal	22547477	+	-13842	RP11-573G6.6	0	5	2	11	4	53	2	4	1	3	6	13	3
10	22535457	22536251	ENSG00000261671	-10463	ENSG00000261671	-10463	-10463	distal	22547477	+	-10463	RP11-573G6.6	13	157	38	51	49	43	45	15	23	20	35	12	16
10	22540801	22541124	ENSG00000261671	-5590	ENSG00000261671	-5590	-5590	distal	22547477	+	-5590	RP11-573G6.6	11	30	5	18	17	24	11	2	5	6	14	13	9
10	22541498	22541723	ENSG00000261671	-4991	ENSG00000261671	-4991	-4991	distal	22547477	+	-4991	RP11-573G6.6	1	33	5	20	11	22	2	1	0	1	3	8	3
10	22548335	22548604	ENSG00000261671	857	ENSG00000261671	857	857	distal	22547477	+	857	RP11-573G6.6	8	23	6	9	6	13	17	9	10	9	19	16	10
10	22585412	22585843	ENSG00000148444	-19059	ENSG00000148444	-19059	-19059	distal	22609235	+	-19059	COMMD3	5	46	9	4	2	15	1	6	1	7	7	5	3
10	22596231	22596483	ENSG00000148444	-8419	ENSG00000148444	-8419	-8419	distal	22609235	+	-8419	COMMD3	10	30	11	8	13	27	6	7	20	14	7	10	20
10	22597321	22597697	ENSG00000148444	-7205	ENSG00000148444	-7205	-7205	distal	22609235	+	-7205	COMMD3	19	52	14	17	19	45	13	24	24	25	39	7	27
10	22603865	22604070	ENSG00000148444	-832	ENSG00000148444	-832	-832	promoter	22609235	+	-832	COMMD3	3	27	4	16	13	40	13	13	10	19	20	14	15
10	22605333	22606292	ENSG00000148444	0	ENSG00000148444	-0.158297	0	promoter	22607755	+	-0.158297	COMMD3	63	227	50	83	69	119	94	33	55	61	44	79	124
10	22614204	22614369	ENSG00000168283	0	ENSG00000168283	0.523456	-216	promoter	22617089	+	0.523456	BMI1	5	30	4	16	7	9	3	6	16	8	7	14	23
10	22614596	22614765	ENSG00000168283	0	ENSG00000168283	-0.000999667	0	promoter	22617600	+	-0.000999667	BMI1	6	24	1	9	10	9	3	2	8	1	6	7	11
10	22624169	22624611	ENSG00000272516	2252	ENSG00000272516	2252	-2258	promoter	22621916	+	2252	RP11-573G6.9	2	85	13	43	29	49	4	32	40	22	28	17	4
10	22625582	22626098	ENSG00000272366	3207	ENSG00000272366	3207	3207	distal	22629544	-	3207	RP11-573G6.10	3	148	29	2	4	73	2	38	43	26	20	31	0
10	22629085	22629499	ENSG00000272366	0	ENSG00000272366	1.92857	0.184874	promoter	22629544	-	1.92857	RP11-573G6.10	4	94	22	33	25	46	20	20	38	22	20	24	11
10	22634305	22634756	ENSG00000077327	0	ENSG00000077327	-0.00295442	0	promoter	22675721	+	-0.00295442	SPAG6	1	1	3	2	0	68	21	21	37	0	5	12	2
10	22638903	22639068	ENSG00000077327	0	ENSG00000077327	0.108393	0.108369	promoter	22675721	+	0.108393	SPAG6	0	8	1	0	0	1	0	0	0	1	5	2	0
10	22654270	22654926	ENSG00000233451	0	ENSG00000233451	0.0803353	0.080316	promoter	22701996	+	0.0803353	RP11-301N24.3	4	60	25	45	33	32	27	31	54	8	12	25	17
10	22656440	22656602	ENSG00000233451	0	ENSG00000233451	0.12215	0.122131	promoter	22701996	+	0.12215	RP11-301N24.3	4	29	8	5	5	7	19	11	18	2	3	4	2
10	22658466	22658748	ENSG00000233451	0	ENSG00000233451	0.161191	0.161172	promoter	22701996	+	0.161191	RP11-301N24.3	7	69	16	23	12	6	18	30	31	7	9	4	5
10	22667192	22667414	ENSG00000233451	0	ENSG00000233451	0.329338	-13317	distal	22701996	+	0.329338	RP11-301N24.3	3	11	4	3	4	3	6	4	7	2	2	5	6
10	22667542	22668413	ENSG00000233451	0	ENSG00000233451	0.336082	-12318	distal	22701996	+	0.336082	RP11-301N24.3	3	126	43	38	24	27	66	27	52	26	19	23	5
10	22679428	22679739	ENSG00000233451	0	ENSG00000233451	0.565122	-992	promoter	22701996	+	0.565122	RP11-301N24.3	1	26	2	7	4	4	2	5	4	2	4	1	3
10	22706685	22706858	ENSG00000077327	0	ENSG00000077327	0.415755	0.415739	promoter	22743153	+	0.415755	SPAG6	1	35	5	2	0	3	1	3	7	2	1	9	1
10	22709824	22710304	ENSG00000077327	0	ENSG00000077327	0.466044	0.466028	promoter	22743153	+	0.466044	SPAG6	3	53	16	4	2	12	21	13	11	7	9	4	9
10	22718841	22719253	ENSG00000077327	0	ENSG00000077327	0.610503	0.610487	promoter	22743153	+	0.610503	SPAG6	2	32	9	11	11	29	5	4	3	6	8	14	12
10	22725726	22726593	ENSG00000077327	0	ENSG00000077327	0.720806	0.72079	promoter	22743153	+	0.720806	SPAG6	29	220	43	82	54	81	77	51	51	54	59	28	87
10	22726743	22727162	ENSG00000077327	0	ENSG00000077327	0.737099	0.737083	promoter	22743153	+	0.737099	SPAG6	7	88	18	15	15	19	12	3	3	16	18	7	21
10	22732344	22732514	ENSG00000077327	0	ENSG00000077327	0.826832	0.826816	promoter	22743153	+	0.826832	SPAG6	2	13	6	5	4	8	1	1	0	8	17	6	5
10	22748391	22748672	ENSG00000077327	5237	ENSG00000077327	5237	5237	distal	22743153	+	5237	SPAG6	6	20	7	5	3	1	2	1	2	3	2	3	2
10	22766964	22767848	ENSG00000077327	23810	ENSG00000077327	23810	57973	distal	22743153	+	23810	SPAG6	10	247	86	21	13	12	12	5	3	66	55	14	24
10	22768330	22768658	ENSG00000077327	25176	ENSG00000077327	25176	57163	distal	22743153	+	25176	SPAG6	11	111	19	16	10	24	3	4	5	15	16	17	46
10	22770892	22771082	ENSG00000077327	27738	ENSG00000077327	27738	54739	distal	22743153	+	27738	SPAG6	1	11	5	6	6	11	4	9	11	6	7	3	6
10	22771205	22771466	ENSG00000077327	28051	ENSG00000077327	28051	54355	distal	22743153	+	28051	SPAG6	1	24	7	11	9	15	3	9	18	8	5	3	7
10	22886108	22886414	ENSG00000150867	0	ENSG00000150867	0.29725	-5465	distal	22898646	-	0.29725	PIP4K2A	2	3	1	10	6	1	1	6	20	3	2	17	2
10	22888071	22888467	ENSG00000150867	0	ENSG00000150867	0.250711	-7428	distal	22898646	-	0.250711	PIP4K2A	0	55	13	11	5	11	17	7	7	11	18	20	5
10	22889861	22890044	ENSG00000150867	0	ENSG00000150867	0.208274	0.203912	promoter	22898646	-	0.208274	PIP4K2A	2	7	0	6	6	0	1	1	2	0	4	22	4
10	22894031	22894583	ENSG00000150867	0	ENSG00000150867	0.109412	0.0963016	promoter	22898646	-	0.109412	PIP4K2A	4	24	8	16	17	4	4	49	90	58	58	20	13
10	22895066	22895593	ENSG00000150867	0	ENSG00000150867	0.0848743	0.0723566	promoter	22898646	-	0.0848743	PIP4K2A	2	169	27	16	7	4	13	28	60	18	28	16	13
10	22900576	22900979	ENSG00000150867	0	ENSG00000150867	0.578572	-1929	promoter	23003037	-	0.578572	PIP4K2A	12	52	14	21	19	30	6	26	45	21	26	15	19
10	22904625	22905317	ENSG00000150867	0	ENSG00000150867	0.555708	-5978	distal	23003037	-	0.555708	PIP4K2A	48	169	24	52	47	80	46	50	83	16	13	14	47
10	22919132	22920010	ENSG00000150867	0	ENSG00000150867	0.473791	-20485	distal	23003037	-	0.473791	PIP4K2A	123	544	150	98	83	155	144	154	293	202	226	77	278
10	22937603	22937889	ENSG00000150867	0	ENSG00000150867	0.866447	-38956	distal	22980759	-	0.866447	PIP4K2A	5	38	9	9	2	3	4	3	9	16	9	9	13
10	22938248	22938531	ENSG00000150867	0	ENSG00000150867	0.853497	-39601	distal	22980759	-	0.853497	PIP4K2A	2	2	1	11	7	15	6	3	4	3	9	2	6
10	22946746	22947112	ENSG00000150867	0	ENSG00000150867	0.682882	0.675514	promoter	22980759	-	0.682882	PIP4K2A	1	23	8	4	2	1	4	1	3	9	9	3	3
10	22971674	22972669	ENSG00000150867	0	ENSG00000150867	0.1824	0.162404	promoter	22980759	-	0.1824	PIP4K2A	23	316	89	171	193	186	81	211	354	72	56	67	205
10	22989157	22989820	ENSG00000150867	0	ENSG00000150867	0.0783769	-8397	distal	23003037	-	0.0783769	PIP4K2A	4	63	17	57	40	93	10	16	36	38	44	17	1
10	22990038	22990547	ENSG00000150867	0	ENSG00000150867	0.0734021	-9278	distal	23003037	-	0.0734021	PIP4K2A	4	27	12	23	24	70	8	15	17	8	15	13	15
10	23002456	23002625	ENSG00000150867	0	ENSG00000150867	0.00328076	0.00232081	promoter	23003037	-	0.00328076	PIP4K2A	1	15	7	9	1	6	4	2	3	7	6	4	5
10	23003762	23003999	ENSG00000150867	-277	ENSG00000150867	-277	-277	promoter	23003484	-	-277	PIP4K2A	6	19	5	18	2	9	6	0	4	4	9	5	4
10	23012295	23013077	ENSG00000150867	-8810	ENSG00000150867	-8810	-8810	distal	23003484	-	-8810	PIP4K2A	22	19	13	36	22	15	8	43	55	19	23	19	22
10	23031653	23031911	ENSG00000150867	-28168	ENSG00000150867	-28168	-28168	distal	23003484	-	-28168	PIP4K2A	5	3	6	7	9	4	2	6	11	4	8	1	6
10	23105837	23106436	ENSG00000206842	29408	ENSG00000206842	29408	29408	distal	23076428	+	29408	RNU6-413P	29	11	2	20	15	13	5	29	32	28	35	16	72
10	23112068	23112323	ENSG00000206842	35639	ENSG00000206842	35639	35639	distal	23076428	+	35639	RNU6-413P	15	5	3	23	17	10	3	12	8	12	21	5	1
10	23138230	23138765	ENSG00000206842	61801	ENSG00000206842	61801	61801	distal	23076428	+	61801	RNU6-413P	3	3	2	6	6	14	1	11	19	9	7	5	11
10	23216670	23217048	ENSG00000165309	0	ENSG00000165309	-0.0101527	0	promoter	23250996	+	-0.0101527	ARMC3	3	15	5	24	12	5	17	5	9	12	22	1	3
10	23277715	23278240	ENSG00000165309	0	ENSG00000165309	0.554476	-7943	distal	23326495	+	0.554476	ARMC3	17	42	20	23	17	42	43	11	15	18	32	18	30
10	23281084	23281350	ENSG00000165309	0	ENSG00000165309	0.585246	-4833	distal	23326495	+	0.585246	ARMC3	5	27	6	8	6	4	1	2	1	7	7	18	9
10	23286111	23286364	ENSG00000223131	0	ENSG00000223131	-0.708738	0	promoter	23286287	+	-0.708738	RNA5SP304	3	6	3	11	9	11	14	3	4	5	3	2	2
10	23303876	23304487	ENSG00000165309	0	ENSG00000165309	0.793413	6572	distal	23326495	+	0.793413	ARMC3	26	52	20	52	33	49	17	19	22	39	36	40	47
10	23357089	23357421	ENSG00000221221	5890	ENSG00000221221	5890	5890	distal	23363407	-	5890	AL139815.1	7	14	6	6	3	11	24	6	10	6	13	10	17
10	23384120	23384568	ENSG00000148450	0	ENSG00000148450	-0.0118837	0	promoter	23410942	+	-0.0118837	MSRB2	24	54	9	36	24	30	28	17	20	15	12	12	29
10	23384811	23385291	ENSG00000148450	0	ENSG00000148450	0.0141849	0.0141472	promoter	23410942	+	0.0141849	MSRB2	15	45	10	22	15	30	22	10	21	20	15	10	21
10	23446901	23447487	ENSG00000252049	-8426	ENSG00000252049	-8426	-8426	distal	23456030	+	-8426	SNORA40	14	21	3	17	13	19	31	11	12	16	18	11	10
10	23447521	23447679	ENSG00000252049	-8234	ENSG00000252049	-8234	-8234	distal	23456030	+	-8234	SNORA40	1	2	0	3	1	2	4	1	2	2	3	1	9
10	234506	234671	ENSG00000015171	0	ENSG00000015171	0.123513	0.123498	promoter	295201	+	0.123513	ZMYND11	4	11	1	4	5	2	2	1	4	0	4	2	1
10	2357244	2357395	ENSG00000234556	0	ENSG00000234556	0.002502	0	promoter	2357269	-	0.002502	LINC00701	0	2	1	0	0	0	15	2	0	1	1	0	6
10	23582074	23582239	ENSG00000179133	0	ENSG00000179133	0.661973	34599	distal	23632893	-	0.661973	C10orf67	11	10	0	10	7	7	7	1	4	1	3	2	7
10	23603666	23603871	ENSG00000179133	0	ENSG00000179133	0.380714	-29014	distal	23632893	-	0.380714	C10orf67	10	6	4	8	8	16	6	3	8	8	12	6	7
10	23614187	23614356	ENSG00000179133	0	ENSG00000179133	0.696848	-18529	distal	23633774	-	0.696848	C10orf67	7	0	1	1	5	4	2	2	3	10	8	5	17
10	23652528	23652810	ENSG00000224215	18417	ENSG00000224215	18417	-18753	distal	23634110	+	18417	RP11-371A19.2	7	2	1	25	18	8	2	11	25	13	20	10	15
10	23686628	23686971	ENSG00000238515	1488	ENSG00000238515	1488	1488	distal	23688528	-	1488	snoU13	2	1	1	1	1	17	2	5	4	8	5	3	11
10	23701166	23701522	ENSG00000238515	-12637	ENSG00000238515	-12637	-12637	distal	23688528	-	-12637	snoU13	5	5	3	28	14	22	0	26	34	8	11	11	7
10	23702501	23703127	ENSG00000238515	-13972	ENSG00000238515	-13972	-13972	distal	23688528	-	-13972	snoU13	84	95	32	86	78	70	6	69	114	129	125	70	181
10	23727617	23727775	ENSG00000165312	-422	ENSG00000165312	-422	-422	promoter	23731308	+	-422	OTUD1	15	33	10	18	13	8	21	13	15	16	23	4	14
10	23727837	23728077	ENSG00000165312	-120	ENSG00000165312	-120	-120	promoter	23731308	+	-120	OTUD1	14	36	6	16	3	11	26	7	10	10	18	3	28
10	23728212	23728416	ENSG00000165312	0	ENSG00000165312	0.00450161	0.00418006	promoter	23731308	+	0.00450161	OTUD1	16	33	10	18	5	10	10	12	18	10	17	7	41
10	23729198	23729624	ENSG00000165312	0	ENSG00000165312	0.321543	0.321222	promoter	23731308	+	0.321543	OTUD1	20	56	15	21	18	32	18	18	26	12	23	17	19
10	23737615	23738173	ENSG00000165312	6306	ENSG00000165312	6306	6306	distal	23731308	+	6306	OTUD1	27	186	50	49	34	66	37	21	47	61	57	32	90
10	23785728	23785968	ENSG00000165312	54419	ENSG00000165312	54419	54419	distal	23731308	+	54419	OTUD1	5	11	2	9	8	3	19	2	4	15	14	12	11
10	23810678	23811089	ENSG00000165312	79369	ENSG00000165312	79369	79369	distal	23731308	+	79369	OTUD1	10	23	4	4	6	7	3	3	1	5	9	6	16
10	23991869	23992206	ENSG00000120549	0	ENSG00000120549	0.0446493	0.0446438	promoter	24166424	+	0.0446493	KIAA1217	19	13	6	18	11	11	20	3	4	14	10	5	13
10	24031423	24031630	ENSG00000120549	0	ENSG00000120549	0.261131	0.261125	promoter	24166424	+	0.261131	KIAA1217	7	1	1	6	4	11	1	2	2	1	6	1	2
10	24283367	24283739	ENSG00000120549	0	ENSG00000120549	0.351299	-163024	distal	24836772	+	0.351299	KIAA1217	9	19	5	16	9	19	22	10	6	10	12	6	9
10	24485525	24485763	ENSG00000120549	0	ENSG00000120549	0.588268	-11956	distal	24836772	+	0.588268	KIAA1217	11	12	5	7	9	13	20	9	6	12	8	4	15
10	24498018	24498725	ENSG00000120549	0	ENSG00000120549	-0.000248135	0	promoter	24836627	+	-0.000248135	KIAA1217	40	92	27	67	37	94	54	64	91	33	38	17	41
10	24498965	24499461	ENSG00000120549	0	ENSG00000120549	0.00254929	0.00254634	promoter	24836627	+	0.00254929	KIAA1217	46	61	21	56	59	81	86	59	67	13	21	12	63
10	24566460	24566694	ENSG00000120549	0	ENSG00000120549	0.0802816	1749	distal	24820821	+	0.0802816	KIAA1217	2	1	0	5	6	16	7	1	2	2	5	0	4
10	24582353	24582721	ENSG00000120549	0	ENSG00000120549	0.137748	17642	distal	24820821	+	0.137748	KIAA1217	7	10	2	5	2	4	29	2	3	6	5	8	2
10	24649404	24649709	ENSG00000120549	0	ENSG00000120549	0.38019	84693	distal	24820821	+	0.38019	KIAA1217	7	7	1	21	8	16	21	7	3	6	8	3	9
10	24659738	24660234	ENSG00000120549	0	ENSG00000120549	0.417556	-78127	distal	24820821	+	0.417556	KIAA1217	6	11	10	11	5	40	8	4	3	11	13	3	10
10	24667010	24667317	ENSG00000120549	0	ENSG00000120549	0.44385	-71044	distal	24820821	+	0.44385	KIAA1217	11	31	7	18	6	4	7	7	16	6	5	2	48
10	24671646	24671905	ENSG00000120549	0	ENSG00000120549	0.460613	-66456	distal	24820821	+	0.460613	KIAA1217	10	105	35	30	23	47	27	28	19	1	7	2	29
10	24672462	24673159	ENSG00000120549	0	ENSG00000120549	0.463564	-65202	distal	24820821	+	0.463564	KIAA1217	86	331	91	129	105	136	175	57	71	85	72	16	213
10	24683587	24684240	ENSG00000120549	0	ENSG00000120549	0.503789	-54121	distal	24820821	+	0.503789	KIAA1217	18	91	27	89	70	169	69	9	14	5	12	7	92
10	24713951	24714407	ENSG00000120549	0	ENSG00000120549	0.613579	-23954	distal	24820821	+	0.613579	KIAA1217	10	57	8	19	10	34	34	19	12	9	13	6	28
10	24717440	24717682	ENSG00000120549	0	ENSG00000120549	0.626195	-20679	distal	24820821	+	0.626195	KIAA1217	3	15	2	18	19	3	21	3	6	4	4	2	5
10	24724364	24724586	ENSG00000120549	0	ENSG00000120549	0.651231	-13775	distal	24820821	+	0.651231	KIAA1217	6	7	3	7	7	7	22	7	10	4	7	0	2
10	24738108	24738850	ENSG00000120549	0	ENSG00000120549	-0.00265039	0	promoter	24834197	+	-0.00265039	KIAA1217	63	205	41	106	76	131	118	116	198	24	24	8	141
10	24740617	24740825	ENSG00000120549	0	ENSG00000120549	0.02353	0.0235196	promoter	24834197	+	0.02353	KIAA1217	6	84	18	9	11	7	12	6	9	0	2	2	29
10	24745164	24745664	ENSG00000120549	0	ENSG00000120549	0.0709762	0.0709657	promoter	24834197	+	0.0709762	KIAA1217	31	170	50	68	58	56	154	26	39	6	11	2	42
10	24748795	24749168	ENSG00000120549	0	ENSG00000120549	0.108864	-6291	distal	24834197	+	0.108864	KIAA1217	15	85	12	28	27	53	61	7	7	15	6	1	55
10	24753055	24753403	ENSG00000120549	0	ENSG00000120549	0.153316	-2056	promoter	24834197	+	0.153316	KIAA1217	15	155	36	21	18	12	36	19	33	4	5	6	33
10	24754777	24755822	ENSG00000120549	0	ENSG00000120549	-0.00839974	0	promoter	24836772	+	-0.00839974	KIAA1217	73	276	73	127	80	160	215	154	201	87	72	11	155
10	24772501	24773108	ENSG00000120549	0	ENSG00000120549	0.209575	-1868	promoter	24836772	+	0.209575	KIAA1217	61	160	34	50	60	69	71	50	101	35	39	7	79
10	24792470	24793001	ENSG00000120549	0	ENSG00000120549	0.466282	0.466228	promoter	24802276	+	0.466282	KIAA1217	15	33	11	22	22	32	45	12	15	3	16	8	20
10	24813790	24814038	ENSG00000120549	0	ENSG00000120549	0.71736	-17310	distal	24836772	+	0.71736	KIAA1217	3	6	5	5	2	19	8	1	1	4	7	3	4
10	24841159	24841585	ENSG00000120549	4386	ENSG00000120549	4386	8521	distal	24836772	+	4386	KIAA1217	12	76	22	11	10	8	80	10	14	4	8	1	13
10	24906792	24907088	ENSG00000107863	0	ENSG00000107863	0.83356	0.0849954	promoter	25012169	-	0.83356	ARHGAP21	4	22	7	6	15	9	20	8	3	6	11	4	12
10	24911851	24912297	ENSG00000107863	0	ENSG00000107863	0.793542	-79	promoter	25012169	-	0.793542	ARHGAP21	2	44	4	6	3	2	6	2	2	6	2	5	8
10	24931848	24932226	ENSG00000107863	0	ENSG00000107863	0.854941	2634	distal	25010795	-	0.854941	ARHGAP21	21	46	7	18	20	16	26	10	13	13	11	10	30
10	24934801	24934966	ENSG00000107863	0	ENSG00000107863	0.822962	5587	distal	25010795	-	0.822962	ARHGAP21	6	24	4	5	3	6	3	1	2	5	1	6	9
10	24941051	24941912	ENSG00000107863	0	ENSG00000107863	0.755279	11837	distal	25010795	-	0.755279	ARHGAP21	45	287	75	58	45	93	59	58	103	27	32	40	95
10	24960132	24960334	ENSG00000107863	0	ENSG00000107863	0.98367	30918	distal	25012176	-	0.98367	ARHGAP21	3	15	2	2	2	6	2	5	3	1	1	4	3
10	24995374	24995695	ENSG00000107863	0	ENSG00000107863	0.31757	0.163512	promoter	25012176	-	0.31757	ARHGAP21	3	40	9	10	5	6	9	6	8	1	3	5	1
10	24996471	24996740	ENSG00000107863	0	ENSG00000107863	0.296836	0.152195	promoter	25012176	-	0.296836	ARHGAP21	5	32	13	6	5	18	3	7	10	5	1	8	5
10	25013307	25013957	ENSG00000107863	-709	ENSG00000107863	-709	-709	promoter	25012597	-	-709	ARHGAP21	110	347	52	95	90	101	105	110	137	61	71	58	225
10	25171234	25171658	ENSG00000099256	0	ENSG00000099256	0.683136	14114	distal	25241513	-	0.683136	PRTFDC1	7	27	3	8	5	2	5	7	10	4	7	10	11
10	25176366	25176982	ENSG00000099256	0	ENSG00000099256	0.633251	19246	distal	25241513	-	0.633251	PRTFDC1	5	72	8	34	26	14	6	9	4	1	9	11	27
10	25189781	25190502	ENSG00000099256	0	ENSG00000099256	0.502853	6948	distal	25241513	-	0.502853	PRTFDC1	30	82	16	70	41	60	30	25	54	34	23	57	88
10	25190662	25191419	ENSG00000099256	0	ENSG00000099256	0.494289	6031	distal	25241513	-	0.494289	PRTFDC1	52	53	11	66	49	108	88	32	76	10	25	25	71
10	25210354	25210573	ENSG00000099256	0	ENSG00000099256	0.703687	-12612	distal	25241521	-	0.703687	PRTFDC1	7	7	2	12	11	3	9	3	11	3	3	7	5
10	25236029	25236554	ENSG00000099256	0	ENSG00000099256	0.123998	0.0481935	promoter	25241521	-	0.123998	PRTFDC1	6	123	21	17	11	9	5	6	11	6	10	15	5
10	25240718	25241074	ENSG00000099256	0	ENSG00000099256	0.0181301	0.00425751	promoter	25241521	-	0.0181301	PRTFDC1	2	19	6	24	23	11	11	4	4	8	3	9	6
10	25304870	25305933	ENSG00000151023	0	ENSG00000151023	0.000610461	0	promoter	25304889	-	0.000610461	ENKUR	194	380	82	222	149	263	249	71	146	68	114	102	191
10	25306003	25306209	ENSG00000185875	0	ENSG00000185875	0.0415751	0.0414751	promoter	25315593	+	0.0415751	THNSL1	17	39	8	33	21	39	32	3	20	12	15	11	23
10	25351399	25351849	ENSG00000266069	28535	ENSG00000266069	28535	28535	distal	25380483	-	28535	AL139821.1	31	27	6	46	46	16	31	25	37	41	49	1	119
10	25369871	25370184	ENSG00000266069	10200	ENSG00000266069	10200	10200	distal	25380483	-	10200	AL139821.1	13	21	8	21	15	19	19	12	18	13	21	12	35
10	25402195	25402489	ENSG00000231422	0	ENSG00000231422	0.00431732	0.00429657	promoter	25450165	+	0.00431732	RP11-80K21.3	17	10	1	13	23	10	25	3	5	9	7	1	17
10	25463513	25463773	ENSG00000233642	0	ENSG00000233642	0.0929466	-217	promoter	25465205	-	0.0929466	GPR158-AS1	24	2	1	0	1	5	11	2	5	2	3	2	0
10	25516178	25516340	ENSG00000151025	0	ENSG00000151025	0.122171	-50972	distal	25891155	+	0.122171	GPR158	12	2	1	6	6	6	7	1	4	1	4	1	6
10	25571352	25571682	ENSG00000151025	0	ENSG00000151025	0.251334	-106146	distal	25891155	+	0.251334	GPR158	11	4	3	18	7	7	4	1	3	9	10	5	7
10	25706594	25706939	ENSG00000151025	0	ENSG00000151025	0.567939	-23820	distal	25891155	+	0.567939	GPR158	20	1	3	31	24	10	3	2	0	2	7	7	1
10	25754843	25755179	ENSG00000151025	0	ENSG00000151025	-0.0282816	0	promoter	25764878	+	-0.0282816	GPR158	2	1	3	1	1	2	3	5	0	19	17	3	42
10	25873909	25874107	ENSG00000151025	0	ENSG00000151025	0.959627	-9034	distal	25891155	+	0.959627	GPR158	1	1	0	3	0	2	1	1	0	4	5	1	21
10	26164184	26164331	ENSG00000226304	49045	ENSG00000226304	49045	-55828	distal	26222639	-	49045	RP11-435M3.2	3	10	0	2	3	7	5	5	8	5	8	5	15
10	26191103	26191351	ENSG00000226304	22025	ENSG00000226304	22025	22025	distal	26222639	-	22025	RP11-435M3.2	5	17	3	1	3	9	14	1	7	17	12	3	9
10	26241713	26242135	ENSG00000095777	0	ENSG00000095777	0.0105349	0.0105195	promoter	26305956	+	0.0105349	MYO3A	3	1	3	1	4	32	2	3	0	26	18	3	8
10	26401589	26401886	ENSG00000095777	0	ENSG00000095777	0.639865	-52884	distal	26501138	+	0.639865	MYO3A	4	0	1	3	1	2	0	2	5	20	15	4	6
10	264665	264952	ENSG00000015171	0	ENSG00000015171	0.205861	0.205837	promoter	298512	+	0.205861	ZMYND11	4	16	5	10	8	4	4	5	6	3	6	3	2
10	26623970	26624755	ENSG00000136750	30482	ENSG00000136750	30482	-102376	distal	26593487	+	30482	GAD2	46	15	4	35	32	39	41	16	24	42	34	16	57
10	26657469	26657688	ENSG00000136750	63981	ENSG00000136750	63981	-69443	distal	26593487	+	63981	GAD2	3	6	0	4	4	5	2	1	1	26	18	3	5
10	26661825	26662217	ENSG00000077420	-64914	ENSG00000077420	-64914	-64914	distal	26856732	+	-64914	APBB1IP	23	12	3	11	13	26	11	8	9	25	19	8	25
10	26698203	26698405	ENSG00000077420	-28726	ENSG00000077420	-28726	-28726	distal	26856732	+	-28726	APBB1IP	11	1	2	5	1	5	2	2	0	10	19	0	6
10	267045	267274	ENSG00000015171	0	ENSG00000015171	0.261702	0.261679	promoter	298512	+	0.261702	ZMYND11	1	20	5	4	4	4	1	4	4	1	0	2	1
10	26719586	26720221	ENSG00000077420	-6910	ENSG00000077420	-6910	-6910	distal	26856732	+	-6910	APBB1IP	100	13	7	78	90	71	6	71	105	79	80	11	179
10	26726602	26727608	ENSG00000077420	0	ENSG00000077420	-0.0118401	0	promoter	26790867	+	-0.0118401	APBB1IP	64	1	3	71	46	31	8	30	44	53	53	5	118
10	26736382	26736636	ENSG00000077420	0	ENSG00000077420	0.142144	0.142128	promoter	26790867	+	0.142144	APBB1IP	5	0	4	20	3	4	3	0	0	1	6	1	0
10	26737585	26738103	ENSG00000077420	0	ENSG00000077420	0.161085	0.161069	promoter	26790867	+	0.161085	APBB1IP	17	2	3	35	30	7	4	6	20	34	36	5	45
10	26745811	26746428	ENSG00000077420	0	ENSG00000077420	0.290602	0.290586	promoter	26790867	+	0.290602	APBB1IP	19	0	1	49	39	8	3	5	11	18	28	13	28
10	26839814	26840459	ENSG00000077420	0	ENSG00000077420	0.86946	-10412	distal	26856732	+	0.86946	APBB1IP	5	0	3	3	3	3	60	2	4	2	7	9	3
10	26895310	26895697	ENSG00000233261	12056	ENSG00000233261	12056	12056	distal	26883253	+	12056	LINC00264	19	5	1	8	15	8	36	5	8	15	9	7	12
10	26973566	26973914	ENSG00000227932	-8477	ENSG00000227932	-8477	-8477	distal	26965088	-	-8477	RP13-16H11.2	22	31	9	15	17	20	17	11	16	18	21	12	26
10	26985892	26986657	ENSG00000148459	0	ENSG00000148459	-0.0143093	0	promoter	27035724	+	-0.0143093	PDSS1	34	80	17	41	23	25	33	19	22	17	26	18	43
10	27015089	27015360	ENSG00000148459	0	ENSG00000148459	0.22204	0.222002	promoter	27035470	+	0.22204	PDSS1	10	21	6	26	18	7	23	5	7	10	15	11	12
10	27026583	27026987	ENSG00000148459	0	ENSG00000148459	0.247548	0.247465	promoter	27035711	+	0.247548	PDSS1	22	82	20	69	37	17	42	47	84	53	40	24	3
10	27027973	27028644	ENSG00000148459	0	ENSG00000148459	0.36213	0.362048	promoter	27035711	+	0.36213	PDSS1	41	161	37	124	107	40	153	78	98	69	59	17	35
10	27044396	27044926	ENSG00000136754	0	ENSG00000136754	0.93858	8684	distal	27149792	-	0.93858	ABI1	22	128	29	47	29	13	7	21	20	35	26	24	54
10	27070013	27070724	ENSG00000136754	0	ENSG00000136754	0.904466	-7221	distal	27112219	-	0.904466	ABI1	31	85	16	48	51	36	29	43	69	61	58	23	40
10	27070909	27071102	ENSG00000136754	0	ENSG00000136754	0.885265	-6843	distal	27112219	-	0.885265	ABI1	5	5	2	5	5	1	1	16	9	3	4	3	3
10	27088218	27088617	ENSG00000136754	0	ENSG00000136754	0.514337	-8642	distal	27112219	-	0.514337	ABI1	16	44	6	16	9	26	52	9	19	26	35	7	30
10	27094489	27094809	ENSG00000136754	0	ENSG00000136754	0.37995	-14913	distal	27112219	-	0.37995	ABI1	7	33	6	10	8	11	21	8	18	8	23	6	5
10	27111021	27111488	ENSG00000136754	0	ENSG00000136754	0.0256729	0.0156438	promoter	27112219	-	0.0256729	ABI1	1	50	11	7	7	7	12	6	2	6	9	6	13
10	27118853	27119300	ENSG00000136754	0	ENSG00000136754	0.27552	-6633	distal	27149792	-	0.27552	ABI1	5	61	13	6	4	1	7	4	8	3	9	5	5
10	27129086	27129516	ENSG00000136754	0	ENSG00000136754	0.184393	-16866	distal	27149792	-	0.184393	ABI1	4	57	8	8	5	10	8	6	8	5	13	5	2
10	27129820	27130177	ENSG00000136754	0	ENSG00000136754	0.177856	-17600	distal	27149792	-	0.177856	ABI1	8	62	19	12	0	6	30	5	6	9	13	7	5
10	27132804	27133051	ENSG00000136754	0	ENSG00000136754	0.151283	0.149074	promoter	27149792	-	0.151283	ABI1	2	19	6	3	4	0	1	14	20	12	10	3	3
10	27148908	27149238	ENSG00000136754	0	ENSG00000136754	0.00787226	0.00492462	promoter	27149792	-	0.00787226	ABI1	54	129	40	45	31	54	100	45	84	62	61	20	99
10	27149407	27150287	ENSG00000136754	0	ENSG00000136754	0.00342853	0	promoter	27149792	-	0.00342853	ABI1	194	436	95	144	125	132	189	126	175	178	161	90	315
10	27168759	27168950	ENSG00000238414	11565	ENSG00000238414	11565	11565	distal	27157193	+	11565	snoU13	1	20	5	4	4	3	6	1	1	4	5	1	0
10	27170912	27171219	ENSG00000238414	13718	ENSG00000238414	13718	13718	distal	27157193	+	13718	snoU13	7	21	7	18	9	11	27	10	2	16	7	12	20
10	27181425	27181845	ENSG00000238414	24231	ENSG00000238414	24231	24231	distal	27157193	+	24231	snoU13	1	31	7	16	11	2	0	6	14	15	23	18	51
10	27319067	27319407	ENSG00000107890	0	ENSG00000107890	0.740737	-15458	distal	27389320	-	0.740737	ANKRD26	7	18	1	6	3	0	6	2	15	7	6	4	8
10	27323976	27324359	ENSG00000107890	0	ENSG00000107890	0.688977	2565	distal	27389320	-	0.688977	ANKRD26	9	20	6	6	2	2	0	2	2	20	12	2	5
10	27388872	27389921	ENSG00000107890	0	ENSG00000107890	0.00472365	0	promoter	27389320	-	0.00472365	ANKRD26	73	177	48	125	74	69	68	89	140	82	85	51	140
10	27443057	27443596	ENSG00000136758	0	ENSG00000136758	0.115568	0	promoter	27444195	-	0.115568	YME1L1	57	156	37	80	47	58	70	39	81	49	57	29	93
10	27443751	27444510	ENSG00000136758	0	ENSG00000136758	0.0450899	0	promoter	27444195	-	0.0450899	YME1L1	84	165	40	73	56	80	66	55	94	61	78	56	126
10	27444608	27445204	ENSG00000120539	0	ENSG00000120539	0.00979274	0.00976104	promoter	27475853	+	0.00979274	MASTL	44	121	28	39	33	19	46	29	41	25	31	21	39
10	27480759	27481019	ENSG00000252639	1267	ENSG00000252639	1267	1267	distal	27482429	-	1267	RNU2-24P	8	23	5	2	0	2	7	0	1	2	10	4	4
10	27481324	27481509	ENSG00000252639	777	ENSG00000252639	777	777	distal	27482429	-	777	RNU2-24P	7	13	4	0	4	1	14	1	1	8	9	3	6
10	27512811	27513039	ENSG00000107897	0	ENSG00000107897	0.755299	8144	distal	27531019	-	0.755299	ACBD5	4	9	5	6	11	6	5	10	8	14	10	8	8
10	27529128	27529781	ENSG00000107897	0	ENSG00000107897	0.0784419	0	promoter	27531019	-	0.0784419	ACBD5	66	211	37	82	41	72	79	74	93	69	49	41	98
10	27530667	27531339	ENSG00000107897	0	ENSG00000107897	0.0146016	0	promoter	27531019	-	0.0146016	ACBD5	96	244	56	101	76	85	103	70	124	66	56	43	152
10	27531836	27532310	ENSG00000262412	0	ENSG00000262412	-0.0290592	0	promoter	27539733	+	-0.0290592	RP11-85G18.6	55	80	28	59	40	47	68	30	52	47	51	27	83
10	27541217	27541781	ENSG00000230445	0	ENSG00000230445	0.847464	-492	promoter	27548384	-	0.847464	LRRC37A6P	17	83	22	6	8	25	7	17	41	26	19	10	45
10	27574132	27574369	ENSG00000238021	0	ENSG00000238021	0.860015	0.859976	promoter	27577753	+	0.860015	ARMC4P1	8	5	0	6	7	4	18	5	12	7	12	4	9
10	27580444	27580731	ENSG00000238021	2690	ENSG00000238021	2690	-23317	distal	27577753	+	2690	ARMC4P1	6	8	2	7	9	9	12	11	12	17	18	1	22
10	27586872	27587246	ENSG00000238021	9118	ENSG00000238021	9118	-16802	distal	27577753	+	9118	ARMC4P1	4	3	1	5	1	7	2	13	18	26	24	5	4
10	27604238	27604428	ENSG00000200369	82	ENSG00000200369	82	82	promoter	27604155	+	82	RNU6-666P	2	1	3	4	4	3	4	7	11	6	3	2	5
10	27608838	27609244	ENSG00000200369	4682	ENSG00000200369	4682	4682	distal	27604155	+	4682	RNU6-666P	4	2	3	12	9	9	3	22	26	16	19	1	17
10	27643408	27644050	ENSG00000213770	-4188	ENSG00000213770	-4188	-4188	distal	27639219	-	-4188	FAM210CP	16	25	9	44	34	25	3	26	33	17	14	19	81
10	27649512	27649822	ENSG00000213770	-10292	ENSG00000213770	-10292	-10292	distal	27639219	-	-10292	FAM210CP	15	32	3	13	16	5	22	9	8	10	10	12	32
10	27655815	27656052	ENSG00000237956	11014	ENSG00000237956	11014	11014	distal	27667291	-	11014	TRIAP1P1	10	8	3	12	10	16	9	6	8	13	3	15	16
10	27680898	27681082	ENSG00000182077	6033	ENSG00000182077	6033	-13606	distal	27703297	-	6033	PTCHD3	6	0	1	0	1	1	14	0	1	5	4	3	2
10	27735203	27735412	ENSG00000182077	-31905	ENSG00000182077	-31905	-31905	distal	27703297	-	-31905	PTCHD3	5	14	8	5	15	6	22	6	5	8	15	13	12
10	27792695	27793663	ENSG00000099246	0	ENSG00000099246	-0.0255795	0	promoter	27826895	+	-0.0255795	RAB18	124	339	67	185	132	129	165	104	168	120	114	66	246
10	27847531	27847845	ENSG00000099246	16387	ENSG00000099246	16387	20635	distal	27831143	+	16387	RAB18	7	16	8	9	10	4	26	1	7	7	5	8	22
10	27853390	27853691	ENSG00000099246	22246	ENSG00000099246	22246	26494	distal	27831143	+	22246	RAB18	7	24	8	3	1	2	4	2	3	14	5	12	18
10	2787051	2787356	ENSG00000235281	177619	ENSG00000235281	177619	-190856	distal	2609431	+	177619	RP11-526P5.2	4	3	3	2	4	2	4	3	11	3	4	1	3
10	27945503	27945809	ENSG00000150051	15994	ENSG00000150051	15994	61682	distal	28034778	-	15994	MKX	13	15	6	12	14	19	15	5	12	22	24	5	16
10	27976505	27977075	ENSG00000150051	0	ENSG00000150051	0.799126	30416	distal	28034989	-	0.799126	MKX	5	50	8	9	16	5	3	1	3	2	1	6	4
10	28008224	28008631	ENSG00000150051	0	ENSG00000150051	0.970699	0.954367	promoter	28032474	-	0.970699	MKX	0	47	10	4	1	4	4	2	1	5	4	4	1
10	28014126	28014403	ENSG00000150051	0	ENSG00000150051	0.734449	0.723321	promoter	28032474	-	0.734449	MKX	9	11	4	29	9	17	4	3	3	11	6	21	25
10	28017225	28017447	ENSG00000150051	0	ENSG00000150051	0.610399	0.601473	promoter	28032474	-	0.610399	MKX	2	29	6	13	10	4	2	1	2	4	0	6	10
10	28029801	28030201	ENSG00000150051	0	ENSG00000150051	0.106997	0.0909455	promoter	28032474	-	0.106997	MKX	36	30	7	51	44	14	5	10	14	30	29	28	48
10	28031147	28031525	ENSG00000150051	0	ENSG00000150051	0.0531182	0.0379473	promoter	28032474	-	0.0531182	MKX	70	156	24	74	54	51	64	44	67	51	48	23	158
10	28032103	28032303	ENSG00000150051	0	ENSG00000150051	1.02891	0.0068049	promoter	28034523	-	1.02891	MKX	15	50	18	23	5	15	14	7	9	4	14	7	19
10	28037616	28038020	ENSG00000230500	0	ENSG00000230500	0.16955	-2626	distal	28056723	+	0.16955	RP11-360I20.2	12	1	4	51	38	89	5	2	1	10	12	16	58
10	28072621	28073065	ENSG00000251810	0	ENSG00000251810	1.74396	0	promoter	28072982	-	1.74396	RN7SKP132	30	43	12	41	36	51	68	18	21	27	34	23	71
10	28173199	28173742	ENSG00000169126	0	ENSG00000169126	0.575135	-19395	distal	28270800	-	0.575135	ARMC4	2	44	7	6	13	2	8	3	0	1	4	6	3
10	28188407	28188946	ENSG00000169126	0	ENSG00000169126	0.485519	-4191	distal	28270800	-	0.485519	ARMC4	8	109	13	9	12	4	39	4	2	7	10	5	14
10	28236558	28236729	ENSG00000169126	0	ENSG00000169126	0.924328	0.200765	promoter	28270833	-	0.924328	ARMC4	0	15	0	7	3	4	1	3	2	3	1	1	0
10	28247387	28247718	ENSG00000169126	0	ENSG00000169126	0.953651	0.13601	promoter	28276378	-	0.953651	ARMC4	15	29	9	13	19	10	24	4	13	15	22	6	22
10	28275862	28276027	ENSG00000169126	0	ENSG00000169126	0.0169737	0.0115132	promoter	28276378	-	0.0169737	ARMC4	1	16	2	3	0	1	1	0	3	2	4	2	2
10	28280284	28280650	ENSG00000169126	0	ENSG00000169126	0.0411655	-3905	distal	28287977	-	0.0411655	ARMC4	12	17	4	24	10	6	11	0	2	26	24	4	17
10	28280830	28281064	ENSG00000169126	0	ENSG00000169126	0.0382438	-4451	distal	28287977	-	0.0382438	ARMC4	3	16	8	10	3	1	8	2	0	6	25	1	0
10	28286950	28287790	ENSG00000169126	0	ENSG00000169126	0.00549551	0.000995291	promoter	28287977	-	0.00549551	ARMC4	16	72	26	51	27	25	35	6	13	36	34	7	37
10	28287903	28288110	ENSG00000169126	0	ENSG00000169126	0.000395976	0	promoter	28287977	-	0.000395976	ARMC4	3	22	4	16	10	10	8	1	1	4	6	2	7
10	28302051	28302225	ENSG00000233472	0	ENSG00000233472	0.267606	8189	distal	28338544	+	0.267606	RP11-218D6.4	3	5	1	4	4	3	11	1	0	2	0	3	1
10	28376662	28377169	ENSG00000150054	0	ENSG00000150054	0.873672	82800	distal	28591995	-	0.873672	MPP7	23	16	5	9	10	4	23	0	0	5	16	7	15
10	28384317	28384817	ENSG00000150054	0	ENSG00000150054	0.842613	90455	distal	28591995	-	0.842613	MPP7	11	40	12	19	12	14	20	3	5	18	15	17	21
10	28384929	28385094	ENSG00000150054	0	ENSG00000150054	0.84013	91067	distal	28591995	-	0.84013	MPP7	5	17	3	8	4	3	4	3	4	0	1	4	9
10	28408145	28408619	ENSG00000150054	0	ENSG00000150054	0.745936	5319	distal	28591995	-	0.745936	MPP7	10	16	11	22	13	26	29	4	5	28	17	8	15
10	28458343	28458791	ENSG00000150054	0	ENSG00000150054	0.432334	0.426594	promoter	28492161	-	0.432334	MPP7	11	69	25	30	17	16	19	2	5	42	31	10	55
10	28467087	28467665	ENSG00000150054	0	ENSG00000150054	0.320549	0.313147	promoter	28492161	-	0.320549	MPP7	31	71	18	54	44	37	40	15	15	32	25	37	57
10	28468410	28468603	ENSG00000150054	0	ENSG00000150054	0.303636	0.301156	promoter	28492161	-	0.303636	MPP7	3	25	6	11	15	18	22	5	4	7	10	5	12
10	28506923	28507092	ENSG00000150054	0	ENSG00000150054	0.405685	-14761	distal	28571035	-	0.405685	MPP7	2	1	1	2	1	4	0	3	3	9	14	9	2
10	28530684	28530921	ENSG00000150054	0	ENSG00000150054	0.255331	-3017	distal	28571035	-	0.255331	MPP7	10	16	9	25	10	13	16	7	9	19	13	10	17
10	28580816	28580967	ENSG00000150054	0	ENSG00000150054	0.0453566	-9748	distal	28591995	-	0.0453566	MPP7	4	2	0	8	3	8	17	2	4	1	3	3	3
10	28591899	28592413	ENSG00000150054	0	ENSG00000150054	0.000389501	0	promoter	28591995	-	0.000389501	MPP7	83	253	45	103	106	103	95	53	83	72	86	49	193
10	28623069	28623576	ENSG00000150054	0	ENSG00000150054	0.0012342	0	promoter	28623415	-	0.0012342	MPP7	38	5	9	30	40	58	76	21	39	38	45	8	93
10	28623796	28624392	ENSG00000150054	-380	ENSG00000150054	-380	-380	promoter	28623415	-	-380	MPP7	45	1	1	38	29	71	67	25	28	28	23	5	37
10	28657041	28657411	ENSG00000237746	-27169	ENSG00000237746	-27169	-27169	distal	28629871	-	-27169	ZNF101P1	18	6	5	14	9	2	2	5	3	10	27	4	32
10	28670767	28671219	ENSG00000222666	25749	ENSG00000222666	25749	25749	distal	28697180	-	25749	U3	19	35	16	21	25	24	57	21	35	27	44	14	30
10	28682911	28683348	ENSG00000222666	13620	ENSG00000222666	13620	13620	distal	28697180	-	13620	U3	16	28	8	24	19	17	38	17	16	19	17	20	32
10	28691623	28691848	ENSG00000222666	5120	ENSG00000222666	5120	5120	distal	28697180	-	5120	U3	4	1	1	6	5	3	6	3	6	16	15	4	5
10	28700488	28701015	ENSG00000222666	-3307	ENSG00000222666	-3307	-3307	distal	28697180	-	-3307	U3	46	15	8	20	26	53	44	27	32	74	63	8	67
10	28718701	28719137	ENSG00000237128	2799	ENSG00000237128	2799	-5992	distal	28784742	-	2799	RP11-351M16.3	7	3	1	1	5	2	3	4	8	3	1	2	77
10	28721195	28721383	ENSG00000237128	553	ENSG00000237128	553	-3746	distal	28784742	-	553	RP11-351M16.3	11	4	4	16	14	9	23	5	7	15	12	4	10
10	28791343	28791525	ENSG00000237128	-6600	ENSG00000237128	-6600	-6600	distal	28784742	-	-6600	RP11-351M16.3	3	0	2	0	1	0	1	0	1	0	0	18	1
10	28821031	28821395	ENSG00000254635	0	ENSG00000254635	0.0260627	0	promoter	28821283	-	0.0260627	WAC-AS1	16	73	17	34	16	30	18	22	28	20	26	14	15
10	28821471	28822098	ENSG00000254635	0	ENSG00000254635	0.0199187	0	promoter	28821672	-	0.0199187	WAC-AS1	65	195	41	80	52	81	62	62	82	78	83	29	119
10	28822800	28823045	ENSG00000095787	0	ENSG00000095787	0.00217422	-6	promoter	28872365	+	0.00217422	WAC	7	46	12	18	8	18	11	8	10	8	12	6	10
10	28831669	28831867	ENSG00000095787	0	ENSG00000095787	0.0837032	0.0836913	promoter	28908889	+	0.0837032	WAC	3	12	7	8	3	2	2	4	16	9	11	7	5
10	28835112	28835463	ENSG00000095787	0	ENSG00000095787	0.124558	0.124546	promoter	28908889	+	0.124558	WAC	9	43	9	7	6	4	13	14	16	31	17	6	18
10	28862209	28862390	ENSG00000095787	0	ENSG00000095787	0.446093	-15275	distal	28908889	+	0.446093	WAC	1	20	0	1	1	1	1	1	4	5	4	2	4
10	28881949	28882113	ENSG00000095787	0	ENSG00000095787	0.680328	-2742	distal	28908889	+	0.680328	WAC	5	9	5	9	1	5	6	4	8	11	16	2	4
10	28913398	28913625	ENSG00000095787	1356	ENSG00000095787	1356	6427	distal	28912041	+	1356	WAC	1	39	6	12	7	6	6	2	7	12	11	5	13
10	28917075	28917789	ENSG00000095787	5033	ENSG00000095787	5033	10104	distal	28912041	+	5033	WAC	35	67	14	54	37	30	39	32	42	45	34	21	35
10	28952674	28953171	ENSG00000207483	-3676	ENSG00000207483	-3676	-3676	distal	28956954	+	-3676	RNU6-1067P	12	9	6	30	19	21	26	7	12	13	24	11	42
10	28966291	28966611	ENSG00000095739	0	ENSG00000095739	-0.0286433	0	promoter	28971606	+	-0.0286433	BAMBI	12	1	0	25	12	12	6	14	13	8	16	7	15
10	29322336	29322530	ENSG00000229605	-133913	ENSG00000229605	-133913	-133913	distal	29188422	-	-133913	RP11-492M23.2	6	0	1	4	5	4	2	1	3	1	3	3	19
10	29574555	29574700	ENSG00000120563	-3289	ENSG00000120563	-3289	-3289	distal	29600161	+	-3289	LYZL1	0	0	0	0	0	0	1	1	2	4	3	4	16
10	29593627	29593772	ENSG00000120563	0	ENSG00000120563	0.483771	0.483733	promoter	29607257	+	0.483771	LYZL1	4	1	0	5	7	7	7	1	3	8	9	2	15
10	29675234	29675608	ENSG00000224597	-22722	ENSG00000224597	-22722	-22722	distal	29747329	+	-22722	PTCHD3P1	12	22	4	9	12	13	25	9	20	22	35	5	25
10	29678958	29679196	ENSG00000224597	-19134	ENSG00000224597	-19134	-19134	distal	29747329	+	-19134	PTCHD3P1	4	20	2	1	3	0	19	8	9	2	11	7	9
10	29698107	29699247	ENSG00000224597	0	ENSG00000224597	-0.0180879	0	promoter	29758051	+	-0.0180879	PTCHD3P1	26	100	19	58	30	33	67	49	74	54	57	33	71
10	29737881	29738165	ENSG00000224597	0	ENSG00000224597	0.657433	24297	distal	29758051	+	0.657433	PTCHD3P1	12	10	3	18	11	13	17	5	11	17	22	8	16
10	29785362	29785656	ENSG00000197321	0	ENSG00000197321	0.892815	0	promoter	29797465	-	0.892815	SVIL	7	7	1	7	6	6	19	9	11	10	12	9	20
10	29851878	29852152	ENSG00000197321	0	ENSG00000197321	0.914729	-12082	distal	29936184	-	0.914729	SVIL	10	11	2	4	9	3	5	0	6	3	5	3	6
10	29879588	29879884	ENSG00000197321	0	ENSG00000197321	0.614073	11308	distal	29936184	-	0.614073	SVIL	16	5	1	16	8	6	32	5	15	16	22	7	9
10	29889111	29889312	ENSG00000197321	0	ENSG00000197321	0.510747	1880	distal	29936184	-	0.510747	SVIL	4	1	0	0	4	0	16	10	11	4	4	2	1
10	29922265	29922589	ENSG00000197321	0	ENSG00000197321	0.151023	0.00741042	promoter	29936184	-	0.151023	SVIL	9	1	0	5	0	3	20	18	15	5	9	4	5
10	29935435	29935774	ENSG00000197321	0	ENSG00000197321	0.00812673	0.00443769	promoter	29936184	-	0.00812673	SVIL	9	1	1	6	4	3	16	10	28	5	6	4	5
10	29947881	29948573	ENSG00000197321	0	ENSG00000197321	0.962391	-11696	distal	29975569	-	0.962391	SVIL	79	2	6	9	18	5	75	41	67	13	23	1	29
10	30315910	30316448	ENSG00000165757	0	ENSG00000165757	0.696494	-13062	distal	30348453	-	0.696494	KIAA1462	20	0	2	7	8	11	40	4	5	17	19	13	16
10	30475452	30475887	ENSG00000165757	-71028	ENSG00000165757	-71028	-71028	distal	30404423	-	-71028	KIAA1462	6	4	0	5	8	1	20	6	10	33	25	4	17
10	30530052	30530353	ENSG00000200887	58144	ENSG00000200887	58144	58144	distal	30588602	-	58144	RNU6-598P	5	0	2	2	3	3	22	0	2	14	12	2	3
10	30530547	30530926	ENSG00000200887	57571	ENSG00000200887	57571	57571	distal	30588602	-	57571	RNU6-598P	9	0	1	6	8	3	24	1	0	8	4	1	9
10	30536723	30536881	ENSG00000200887	51616	ENSG00000200887	51616	51616	distal	30588602	-	51616	RNU6-598P	13	5	1	7	7	1	14	0	0	4	1	1	7
10	30574130	30574708	ENSG00000200887	13789	ENSG00000200887	13789	13789	distal	30588602	-	13789	RNU6-598P	11	12	5	8	12	3	23	16	22	13	25	14	27
10	30637598	30638405	ENSG00000107951	0	ENSG00000107951	0.0535423	0	promoter	30638090	-	0.0535423	MTPAP	32	97	15	38	20	34	39	38	46	35	31	22	43
10	30646262	30646659	ENSG00000107951	0	ENSG00000107951	0.278491	0.990981	promoter	30663370	-	0.278491	MTPAP	9	74	13	6	2	12	7	9	6	4	7	11	7
10	30648456	30649126	ENSG00000107951	0	ENSG00000107951	0.242776	4869	distal	30663370	-	0.242776	MTPAP	74	139	32	99	62	74	85	51	78	59	46	29	67
10	30654252	30654445	ENSG00000241621	0	ENSG00000241621	0.90848	0	promoter	30663315	-	0.90848	GOLGA2P6	4	4	3	2	3	8	2	12	8	4	7	2	4
10	30673696	30673942	ENSG00000235679	1144	ENSG00000235679	1144	1144	distal	30672551	+	1144	RP11-449I17.9	8	5	2	8	7	2	36	4	4	5	4	3	4
10	30681415	30681878	ENSG00000235679	8863	ENSG00000235679	8863	8863	distal	30672551	+	8863	RP11-449I17.9	14	44	15	34	11	17	29	19	16	18	20	9	25
10	30703041	30703297	ENSG00000224473	-10335	ENSG00000224473	-10335	-10335	distal	30692705	-	-10335	RP11-449I17.5	14	20	5	19	10	9	21	12	8	9	16	7	14
10	30707366	30707529	ENSG00000224473	-14660	ENSG00000224473	-14660	-14660	distal	30692705	-	-14660	RP11-449I17.5	9	5	1	5	2	1	7	3	3	4	14	5	3
10	30707799	30707989	ENSG00000107968	-14876	ENSG00000107968	-14876	-14876	distal	30750761	+	-14876	MAP3K8	9	9	4	5	6	4	5	6	14	10	3	6	10
10	30722515	30723146	ENSG00000107968	0	ENSG00000107968	-0.033889	0	promoter	30739447	+	-0.033889	MAP3K8	81	308	63	131	74	77	48	88	131	78	70	41	147
10	30723429	30723608	ENSG00000107968	0	ENSG00000107968	-0.0104715	0	promoter	30739351	+	-0.0104715	MAP3K8	19	59	13	28	14	7	8	14	12	12	9	8	15
10	30726069	30726306	ENSG00000107968	0	ENSG00000107968	0.157073	-1444	promoter	30739351	+	0.157073	MAP3K8	22	73	13	38	35	17	31	30	37	20	23	20	42
10	30736093	30736634	ENSG00000107968	0	ENSG00000107968	0.696885	0.696798	promoter	30739567	+	0.696885	MAP3K8	1	5	3	54	39	4	137	7	10	10	14	16	8
10	30744798	30745528	ENSG00000107968	0	ENSG00000107968	0.74082	5230	distal	30750762	+	0.74082	MAP3K8	3	49	8	13	12	3	14	6	12	14	5	12	15
10	30757124	30757299	ENSG00000107968	6361	ENSG00000107968	6361	17556	distal	30750762	+	6361	MAP3K8	3	11	2	5	1	0	2	3	5	7	4	5	7
10	30782463	30783581	ENSG00000213778	22963	ENSG00000213778	22963	22963	distal	30807790	-	22963	HNRNPA1P32	24	81	26	88	45	19	36	131	209	42	43	22	17
10	30791271	30791867	ENSG00000213778	14677	ENSG00000213778	14677	14677	distal	30807790	-	14677	HNRNPA1P32	9	15	5	8	10	7	6	19	40	15	20	9	36
10	30799258	30800285	ENSG00000213778	6259	ENSG00000213778	6259	6259	distal	30807790	-	6259	HNRNPA1P32	55	104	29	63	69	39	123	67	113	98	91	44	48
10	30811795	30811970	ENSG00000213778	-4004	ENSG00000213778	-4004	-4004	distal	30807790	-	-4004	HNRNPA1P32	3	16	2	3	3	2	1	3	3	3	9	7	4
10	30818207	30819045	ENSG00000213778	-10416	ENSG00000213778	-10416	-10416	distal	30807790	-	-10416	HNRNPA1P32	89	246	51	129	64	57	76	86	119	163	132	41	82
10	30823551	30823699	ENSG00000213778	-15760	ENSG00000213778	-15760	-15760	distal	30807790	-	-15760	HNRNPA1P32	6	17	5	7	4	12	15	13	14	12	15	9	23
10	30829346	30829653	ENSG00000228800	13129	ENSG00000228800	13129	13129	distal	30843412	-	13129	RP11-253D19.1	3	20	8	4	2	9	10	5	12	8	7	13	3
10	30831396	30831547	ENSG00000228800	11235	ENSG00000228800	11235	11235	distal	30843412	-	11235	RP11-253D19.1	0	8	2	8	4	2	11	6	6	3	10	12	7
10	30872619	30873274	ENSG00000230298	3507	ENSG00000230298	3507	3507	distal	30869111	+	3507	RP11-253D19.2	29	65	14	38	19	9	32	30	61	43	28	18	25
10	30880221	30880452	ENSG00000230298	11109	ENSG00000230298	11109	11109	distal	30869111	+	11109	RP11-253D19.2	12	21	7	11	14	12	8	5	15	19	11	13	19
10	30889051	30889241	ENSG00000151033	11476	ENSG00000151033	11476	19939	distal	30918691	-	11476	LYZL2	5	9	6	7	7	0	2	5	9	4	3	5	2
10	30919535	30919980	ENSG00000151033	-843	ENSG00000151033	-843	-843	promoter	30918691	-	-843	LYZL2	8	0	4	3	5	2	7	16	19	31	26	3	5
10	30926991	30927318	ENSG00000151033	-8299	ENSG00000151033	-8299	-8299	distal	30918691	-	-8299	LYZL2	14	11	3	10	6	9	16	16	22	18	27	6	12
10	30952176	30952801	ENSG00000230998	5711	ENSG00000230998	5711	-7693	distal	30946464	+	5711	RP11-14C22.3	32	22	15	27	14	9	8	35	63	41	43	10	13
10	30959944	30960286	ENSG00000234814	-208	ENSG00000234814	-208	-208	promoter	31006195	+	-208	SVILP1	12	23	9	11	16	18	12	16	14	10	22	4	24
10	30966235	30966946	ENSG00000234814	0	ENSG00000234814	0.125602	0.12558	promoter	31006195	+	0.125602	SVILP1	10	19	2	53	51	11	16	6	8	6	3	6	43
10	30971342	30971685	ENSG00000234814	0	ENSG00000234814	0.237352	0.23733	promoter	31006195	+	0.237352	SVILP1	23	79	15	33	28	29	23	8	9	32	39	12	10
10	30975663	30975995	ENSG00000234814	0	ENSG00000234814	0.331904	-6595	distal	31006195	+	0.331904	SVILP1	5	30	6	10	5	17	7	9	17	28	24	1	16
10	30976591	30976984	ENSG00000234814	0	ENSG00000234814	0.35221	-5606	distal	31006195	+	0.35221	SVILP1	12	29	11	16	14	14	16	13	10	12	16	6	22
10	30990235	30990958	ENSG00000234814	0	ENSG00000234814	0.25531	0.255263	promoter	31005942	+	0.25531	SVILP1	66	441	110	96	94	94	137	142	238	148	115	22	112
10	30993982	30994711	ENSG00000234814	0	ENSG00000234814	0.43296	0.432913	promoter	31005942	+	0.43296	SVILP1	39	184	45	98	81	77	77	41	53	59	50	27	94
10	30995740	30995951	ENSG00000234814	0	ENSG00000234814	0.51631	0.516262	promoter	31005942	+	0.51631	SVILP1	3	3	0	29	10	15	16	11	17	6	8	2	31
10	31015651	31016164	ENSG00000230720	2981	ENSG00000230720	2981	2981	distal	31012669	+	2981	RP11-14C22.6	22	34	3	35	25	31	23	19	19	23	25	11	31
10	310298	311370	ENSG00000151240	8759	ENSG00000151240	8759	-11753	distal	735606	-	8759	DIP2C	31	125	47	232	231	70	16	189	260	14	14	32	5
10	31036631	31036796	ENSG00000230720	23961	ENSG00000230720	23961	23961	distal	31012669	+	23961	RP11-14C22.6	4	12	3	11	10	8	14	10	15	21	9	2	4
10	31040747	31041100	ENSG00000230720	28077	ENSG00000230720	28077	28077	distal	31012669	+	28077	RP11-14C22.6	14	18	2	12	26	4	12	12	9	13	15	1	18
10	31048498	31049020	ENSG00000230720	35828	ENSG00000230720	35828	35828	distal	31012669	+	35828	RP11-14C22.6	5	7	4	14	14	19	8	41	44	11	5	9	17
10	31071762	31071913	ENSG00000183621	37222	ENSG00000183621	37222	48843	distal	31212317	-	37222	ZNF438	6	1	1	4	5	2	18	8	7	3	6	2	14
10	31072110	31072400	ENSG00000183621	36735	ENSG00000183621	36735	48356	distal	31212317	-	36735	ZNF438	7	6	6	9	3	8	25	14	14	3	3	5	44
10	3113731	3114011	ENSG00000067057	0	ENSG00000067057	0.0367321	0.0367038	promoter	3147665	+	0.0367321	PFKP	22	0	1	5	2	5	6	4	3	4	7	2	16
10	31217741	31218717	ENSG00000183621	0	ENSG00000183621	0.550982	-5423	distal	31320854	-	0.550982	ZNF438	9	6	1	26	27	6	17	11	28	16	13	4	98
10	31220118	31220304	ENSG00000183621	0	ENSG00000183621	0.538281	-7800	distal	31320854	-	0.538281	ZNF438	3	0	1	0	5	2	7	5	3	4	7	1	27
10	313013	313236	ENSG00000151240	6893	ENSG00000151240	6893	-9887	distal	735606	-	6893	DIP2C	4	3	1	15	17	1	4	20	32	3	4	5	4
10	31320353	31321536	ENSG00000183621	0	ENSG00000183621	0.00267708	0	promoter	31320854	-	0.00267708	ZNF438	166	55	16	150	91	156	145	64	116	141	142	60	236
10	31372755	31372960	ENSG00000263578	-17778	ENSG00000263578	-17778	-17778	distal	31354976	-	-17778	AL359546.1	9	14	3	4	7	8	5	5	6	6	12	0	14
10	31390078	31390295	ENSG00000263578	-35101	ENSG00000263578	-35101	-35101	distal	31354976	-	-35101	AL359546.1	3	9	3	14	9	14	7	11	5	11	12	6	8
10	31422519	31423553	ENSG00000272381	-53258	ENSG00000272381	-53258	-53258	distal	31550839	+	-53258	RP11-192P3.4	33	123	22	64	32	62	53	51	71	25	29	17	69
10	31531765	31532328	ENSG00000237036	0	ENSG00000237036	0.677656	-16199	distal	31608620	-	0.677656	ZEB1-AS1	12	10	4	15	14	13	11	14	40	7	18	6	11
10	31596838	31597156	ENSG00000237036	0	ENSG00000237036	1.00768	-10267	distal	31607861	-	1.00768	ZEB1-AS1	2	17	2	7	3	2	3	2	1	4	6	6	2
10	31607096	31608137	ENSG00000237036	0	ENSG00000237036	1.19944	0	promoter	31608810	-	1.19944	ZEB1-AS1	118	219	50	110	66	95	83	90	120	123	99	52	132
10	31609294	31609761	ENSG00000237036	0	ENSG00000237036	0.0369869	0	promoter	31609376	-	0.0369869	ZEB1-AS1	21	87	27	31	24	22	20	28	54	31	21	16	43
10	31610408	31610995	ENSG00000148516	0	ENSG00000148516	-0.0145161	0	promoter	31647519	+	-0.0145161	ZEB1	15	203	43	63	16	67	55	45	52	47	41	48	38
10	31631948	31632272	ENSG00000148516	0	ENSG00000148516	0.57433	-11800	distal	31647519	+	0.57433	ZEB1	1	25	3	6	3	3	2	9	5	12	9	7	0
10	31637271	31637687	ENSG00000148516	0	ENSG00000148516	0.719847	-6385	distal	31647519	+	0.719847	ZEB1	22	47	14	24	17	14	30	20	34	20	25	18	35
10	31638406	31638671	ENSG00000148516	0	ENSG00000148516	0.750875	-5401	distal	31647519	+	0.750875	ZEB1	16	42	11	28	19	19	12	25	30	26	31	10	33
10	31642425	31642909	ENSG00000148516	0	ENSG00000148516	0.860744	-1163	promoter	31647519	+	0.860744	ZEB1	36	123	42	43	29	49	46	40	74	43	49	19	77
10	31672980	31673730	ENSG00000196960	0	ENSG00000196960	0.409696	-2321	promoter	31688682	-	0.409696	RP11-192P3.5	73	243	49	90	99	92	138	123	227	130	128	51	160
10	31682838	31683131	ENSG00000196960	0	ENSG00000196960	0.152481	0.14481	promoter	31688682	-	0.152481	RP11-192P3.5	2	46	6	9	0	1	2	8	7	6	8	3	7
10	31686787	31687046	ENSG00000196960	0	ENSG00000196960	0.0494442	0.0426603	promoter	31688682	-	0.0494442	RP11-192P3.5	5	39	11	5	4	1	3	9	9	12	5	5	7
10	31702301	31702606	ENSG00000148516	0	ENSG00000148516	0.548844	-13618	distal	31750165	+	0.548844	ZEB1	5	26	4	3	1	5	2	12	21	8	12	4	7
10	31747005	31747210	ENSG00000148516	0	ENSG00000148516	0.970215	-58322	distal	31750165	+	0.970215	ZEB1	3	23	8	3	3	0	3	0	4	1	2	3	2
10	31757302	31757453	ENSG00000148516	0	ENSG00000148516	0.811681	-68619	distal	31791334	+	0.811681	ZEB1	5	5	0	4	6	6	9	0	4	4	6	4	2
10	31779921	31780305	ENSG00000148516	0	ENSG00000148516	0.936845	-91238	distal	31791334	+	0.936845	ZEB1	9	42	6	6	7	4	18	7	3	3	9	7	8
10	31799042	31799218	ENSG00000148516	0	ENSG00000148516	0.976514	-94309	distal	31803579	+	0.976514	ZEB1	5	16	9	0	4	3	3	3	0	4	4	0	5
10	31892348	31892846	ENSG00000223834	-681	ENSG00000223834	-681	-681	promoter	31895146	+	-681	RP11-472N13.2	33	1	0	43	23	0	4	4	7	12	8	8	25
10	31986729	31987135	ENSG00000237797	0	ENSG00000237797	0.670232	0.641779	promoter	31996316	-	0.670232	RP11-472N13.3	6	3	5	8	7	5	4	36	36	18	20	8	16
10	31996426	31996942	ENSG00000237797	-109	ENSG00000237797	-109	-109	promoter	31996316	-	-109	RP11-472N13.3	7	0	1	18	5	3	9	39	48	13	16	1	7
10	32034537	32034942	ENSG00000222412	10027	ENSG00000222412	10027	10027	distal	32045064	-	10027	Y_RNA	11	3	2	31	31	10	10	32	32	10	23	10	28
10	32048179	32048373	ENSG00000222412	-3114	ENSG00000222412	-3114	-3114	distal	32045064	-	-3114	Y_RNA	5	1	2	20	19	18	27	8	13	11	13	11	5
10	32048832	32049587	ENSG00000222412	-3767	ENSG00000222412	-3767	-3767	distal	32045064	-	-3767	Y_RNA	145	90	20	126	87	131	145	72	113	71	99	44	213
10	32097471	32097825	ENSG00000165322	0	ENSG00000165322	0.981778	0	promoter	32217728	-	0.981778	ARHGAP12	23	26	14	20	13	14	26	14	20	26	18	7	18
10	32125620	32126122	ENSG00000165322	0	ENSG00000165322	0.518378	0.205724	promoter	32143108	-	0.518378	ARHGAP12	28	36	10	23	21	21	32	7	6	28	24	19	7
10	3214710	3215703	ENSG00000107959	0	ENSG00000107959	0.00755192	0	promoter	3214974	-	0.00755192	PITRM1	212	588	148	142	95	151	177	120	215	193	202	93	333
10	32151246	32151627	ENSG00000165322	0	ENSG00000165322	0.542759	-8137	distal	32217728	-	0.542759	ARHGAP12	8	27	2	9	15	9	36	3	20	5	5	20	15
10	32209497	32209928	ENSG00000165322	0	ENSG00000165322	0.0671979	6814	distal	32217728	-	0.0671979	ARHGAP12	2	0	2	15	6	11	3	3	5	12	14	21	27
10	32209944	32210447	ENSG00000165322	0	ENSG00000165322	0.0635486	0.0594339	promoter	32217728	-	0.0635486	ARHGAP12	9	46	9	8	9	4	2	5	9	11	13	17	24
10	32215103	32215417	ENSG00000165322	0	ENSG00000165322	0.0214305	0.0188588	promoter	32217728	-	0.0214305	ARHGAP12	3	1	4	7	6	3	1	5	8	51	39	3	2
10	32216753	32216973	ENSG00000165322	0	ENSG00000165322	0.0079599	0.00615565	promoter	32217728	-	0.0079599	ARHGAP12	15	40	13	21	12	16	27	8	14	11	12	13	25
10	32218429	32218619	ENSG00000165322	-686	ENSG00000165322	-686	-686	promoter	32217742	-	-686	ARHGAP12	6	23	9	9	4	19	13	5	15	7	11	6	13
10	32218699	32219031	ENSG00000165322	-956	ENSG00000165322	-956	-956	promoter	32217742	-	-956	ARHGAP12	6	23	8	11	5	12	15	5	14	3	11	3	10
10	32219224	32219401	ENSG00000165322	-1481	ENSG00000165322	-1481	-1481	promoter	32217742	-	-1481	ARHGAP12	5	29	8	13	14	10	10	7	9	8	8	3	12
10	32238339	32238546	ENSG00000165322	-20596	ENSG00000165322	-20596	-20596	distal	32217742	-	-20596	ARHGAP12	10	8	3	3	2	0	8	4	8	2	4	9	31
10	32250354	32250988	ENSG00000230240	-21824	ENSG00000230240	-21824	-21824	distal	32273482	+	-21824	RP11-241I20.1	13	15	4	27	26	30	31	22	30	30	29	31	44
10	32291090	32291262	ENSG00000170759	6675	ENSG00000170759	6675	-9780	distal	32345359	-	6675	KIF5B	0	21	4	2	5	1	2	0	1	5	3	0	7
10	32301006	32301172	ENSG00000170759	0	ENSG00000170759	0.935303	4962	distal	32345359	-	0.935303	KIF5B	3	13	3	3	2	3	7	2	2	7	8	2	3
10	32344464	32345643	ENSG00000170759	0	ENSG00000170759	0.0188735	0	promoter	32345359	-	0.0188735	KIF5B	50	160	34	68	33	65	51	51	75	54	54	43	89
10	3239753	3240329	ENSG00000107959	-24749	ENSG00000107959	-24749	-24749	distal	3215003	-	-24749	PITRM1	9	11	6	21	19	15	20	70	95	11	22	11	27
10	32479716	32480142	ENSG00000217094	-1970	ENSG00000217094	-1970	-1970	promoter	32477745	-	-1970	PPIAP31	10	20	11	19	15	20	15	5	11	15	21	13	20
10	32539531	32539745	ENSG00000227253	-15471	ENSG00000227253	-15471	-15471	distal	32558402	+	-15471	RP11-166N17.1	5	13	3	9	7	1	4	19	13	5	5	3	22
10	32542123	32542556	ENSG00000227253	-12660	ENSG00000227253	-12660	-12660	distal	32558402	+	-12660	RP11-166N17.1	11	20	8	10	5	5	13	18	37	3	12	6	26
10	32545642	32546053	ENSG00000227253	-9163	ENSG00000227253	-9163	-9163	distal	32558402	+	-9163	RP11-166N17.1	25	47	12	28	26	16	30	9	22	16	17	17	25
10	32552450	32552626	ENSG00000227253	-2590	ENSG00000227253	-2590	-2590	distal	32558402	+	-2590	RP11-166N17.1	1	11	5	0	3	2	2	5	3	0	4	2	1
10	32606619	32607182	ENSG00000120616	0	ENSG00000120616	0.448399	-28244	distal	32635747	-	0.448399	EPC1	28	67	8	47	23	18	29	12	29	26	21	29	54
10	32607417	32607772	ENSG00000120616	0	ENSG00000120616	0.436115	-27654	distal	32635747	-	0.436115	EPC1	8	6	1	24	23	16	31	10	28	11	14	17	8
10	32615138	32615459	ENSG00000120616	0	ENSG00000120616	0.317257	-19967	distal	32635747	-	0.317257	EPC1	4	34	5	8	6	6	6	3	4	4	6	14	4
10	32621209	32621667	ENSG00000120616	0	ENSG00000120616	0.223799	-13759	distal	32635747	-	0.223799	EPC1	12	50	19	32	29	22	31	32	31	21	23	13	5
10	32634997	32636165	ENSG00000222309	0	ENSG00000222309	10.6951	0	promoter	32635874	-	10.6951	AL391839.1	78	234	59	117	58	118	93	105	123	94	104	68	139
10	32636302	32636481	ENSG00000120616	0	ENSG00000120616	0.282979	0	promoter	32667726	-	0.282979	EPC1	3	35	6	9	3	13	5	5	13	6	10	5	7
10	3264532	3264721	ENSG00000236968	-1286	ENSG00000236968	-1286	-1286	promoter	3269599	+	-1286	RP11-298E9.5	3	13	2	2	0	1	3	1	2	2	5	0	7
10	32656822	32657176	ENSG00000120616	0	ENSG00000120616	0.0981927	8864	distal	32667726	-	0.0981927	EPC1	10	21	10	15	14	20	22	8	9	15	22	12	14
10	32666484	32666818	ENSG00000120616	0	ENSG00000120616	0.704863	0.481679	promoter	32667542	-	0.704863	EPC1	32	64	22	25	35	34	50	17	33	46	45	28	41
10	32667484	32667994	ENSG00000120616	0	ENSG00000120616	0.0386409	0	promoter	32667542	-	0.0386409	EPC1	52	158	41	62	44	71	49	38	75	46	45	51	80
10	32668330	32668831	ENSG00000120616	-603	ENSG00000120616	-603	-603	promoter	32667726	-	-603	EPC1	11	90	33	60	52	64	40	50	82	50	41	47	41
10	32675912	32676126	ENSG00000200484	7359	ENSG00000200484	7359	7359	distal	32683593	-	7359	RNU6-1244P	1	12	6	1	2	3	1	3	2	1	4	4	3
10	3269905	3270445	ENSG00000236968	305	ENSG00000236968	305	305	promoter	3269599	+	305	RP11-298E9.5	9	0	2	13	9	21	28	32	35	11	11	3	48
10	32702483	32702839	ENSG00000200484	-18889	ENSG00000200484	-18889	-18889	distal	32683593	-	-18889	RNU6-1244P	12	35	12	19	27	19	30	27	34	18	22	8	18
10	3272096	3272287	ENSG00000236968	2496	ENSG00000236968	2496	2496	distal	3269599	+	2496	RP11-298E9.5	3	1	1	1	2	9	2	8	16	1	1	2	0
10	32734650	32735538	ENSG00000216937	0	ENSG00000216937	-0.00975159	0	promoter	32803509	+	-0.00975159	CCDC7	61	181	51	83	54	80	66	60	80	58	72	45	91
10	3281830	3282106	ENSG00000226762	456	ENSG00000226762	456	12230	distal	3299402	-	456	RP11-298E9.6	9	5	3	8	3	18	12	8	10	16	11	10	21
10	329666	330351	ENSG00000151240	0	ENSG00000151240	0.977048	-1600	promoter	735606	-	0.977048	DIP2C	45	111	26	71	49	20	2	91	124	9	11	18	64
10	33195650	33195952	ENSG00000150093	0	ENSG00000150093	0.508762	0.196778	promoter	33200992	-	0.508762	ITGB1	10	5	4	12	12	4	0	14	23	5	3	6	29
10	33247150	33247405	ENSG00000150093	0	ENSG00000150093	0.000176691	0	promoter	33247155	-	0.000176691	ITGB1	11	19	4	17	9	17	14	5	4	5	7	2	23
10	33260582	33260847	ENSG00000150093	0	ENSG00000150093	0.449373	-8370	distal	33294720	-	0.449373	ITGB1	3	9	6	19	12	27	6	4	7	4	8	3	7
10	33261885	33262128	ENSG00000150093	0	ENSG00000150093	0.432221	-9340	distal	33294720	-	0.432221	ITGB1	4	1	2	22	5	38	7	0	2	5	4	3	14
10	33269300	33270134	ENSG00000150093	0	ENSG00000150093	0.334615	-1334	promoter	33294720	-	0.334615	ITGB1	78	104	18	122	85	129	130	73	120	74	69	27	75
10	33274684	33275106	ENSG00000150093	0	ENSG00000150093	0.263743	0.0322817	promoter	33294720	-	0.263743	ITGB1	3	32	7	7	3	4	15	4	4	9	8	3	8
10	33284778	33285069	ENSG00000150093	0	ENSG00000150093	0.130871	-3386	distal	33294720	-	0.130871	ITGB1	8	7	3	17	15	11	4	6	2	7	17	4	15
10	33294103	33294796	ENSG00000150093	0	ENSG00000150093	0.00812184	0	promoter	33294720	-	0.00812184	ITGB1	35	28	8	58	57	65	39	57	116	45	50	16	29
10	33339050	33339321	ENSG00000229656	0	ENSG00000229656	0.67879	7221	distal	33371030	+	0.67879	RP11-462L8.1	19	1	1	3	1	7	0	0	0	3	1	4	25
10	33339378	33339625	ENSG00000229656	0	ENSG00000229656	0.682084	6917	distal	33371030	+	0.682084	RP11-462L8.1	8	0	1	1	0	8	1	0	4	0	0	2	11
10	33384858	33385286	ENSG00000233387	0	ENSG00000233387	1.01602	2176	distal	33405600	-	1.01602	RP11-342D11.3	18	5	0	33	19	16	1	13	14	10	9	13	49
10	33387995	33388213	ENSG00000233387	0	ENSG00000233387	0.862356	-430	promoter	33405600	-	0.862356	RP11-342D11.3	8	2	1	13	11	8	1	6	7	5	4	0	26
10	33405343	33405683	ENSG00000233387	0	ENSG00000233387	0.0125888	0	promoter	33405600	-	0.0125888	RP11-342D11.3	3	0	3	31	23	2	5	2	1	4	2	6	0
10	33406741	33407068	ENSG00000233387	-1140	ENSG00000233387	-1140	-1140	promoter	33405600	-	-1140	RP11-342D11.3	14	3	1	43	33	16	4	6	5	6	6	2	7
10	33422950	33423506	ENSG00000233387	-17349	ENSG00000233387	-17349	-17349	distal	33405600	-	-17349	RP11-342D11.3	67	2	4	68	83	39	12	34	71	1	14	17	176
10	33425380	33426010	ENSG00000233387	-19779	ENSG00000233387	-19779	-19779	distal	33405600	-	-19779	RP11-342D11.3	19	2	3	64	44	45	4	21	42	9	6	5	31
10	33428118	33428382	ENSG00000233387	-22517	ENSG00000233387	-22517	-22517	distal	33405600	-	-22517	RP11-342D11.3	19	5	1	16	13	9	5	8	13	7	6	6	38
10	33432292	33432615	ENSG00000233387	-26691	ENSG00000233387	-26691	-26691	distal	33405600	-	-26691	RP11-342D11.3	3	1	0	16	17	15	1	8	12	3	3	2	21
10	33440090	33440666	ENSG00000099250	25753	ENSG00000099250	25753	28158	distal	33623564	-	25753	NRP1	14	0	3	43	32	47	1	4	5	6	7	2	44
10	33444781	33444926	ENSG00000099250	21493	ENSG00000099250	21493	23898	distal	33623564	-	21493	NRP1	5	0	1	17	8	9	1	1	6	4	2	2	14
10	33482253	33482609	ENSG00000099250	0	ENSG00000099250	0.914138	-7669	distal	33623310	-	0.914138	NRP1	11	0	3	17	13	11	26	9	13	12	13	8	22
10	33553010	33553649	ENSG00000099250	0	ENSG00000099250	0.574085	-377	promoter	33624006	-	0.574085	NRP1	16	1	1	49	44	27	13	8	27	14	22	9	30
10	3356341	3357331	ENSG00000227338	47133	ENSG00000227338	47133	47133	distal	3309207	+	47133	RP11-195B3.1	40	6	12	26	38	85	23	57	48	30	28	33	27
10	33619644	33619834	ENSG00000099250	0	ENSG00000099250	0.0352719	0.0225202	promoter	33624006	-	0.0352719	NRP1	6	4	4	9	3	5	7	5	12	5	8	4	10
10	33622667	33622832	ENSG00000099250	0	ENSG00000099250	0.0108274	0.00309126	promoter	33624006	-	0.0108274	NRP1	9	9	3	10	6	1	4	1	4	6	7	1	4
10	33723922	33724112	ENSG00000273012	93088	ENSG00000273012	93088	93088	distal	33630833	+	93088	RP11-90B22.1	1	0	2	2	2	0	2	2	9	1	3	1	3
10	33795787	33796245	ENSG00000226412	71613	ENSG00000226412	71613	71613	distal	33888968	-	71613	RP11-476F14.1	39	5	2	31	19	37	48	6	11	7	9	5	91
10	33798081	33798667	ENSG00000226412	69191	ENSG00000226412	69191	69191	distal	33888968	-	69191	RP11-476F14.1	65	3	2	30	23	33	29	8	18	12	11	4	98
10	33901393	33901916	ENSG00000226412	-12424	ENSG00000226412	-12424	-12424	distal	33888968	-	-12424	RP11-476F14.1	20	7	4	14	20	12	27	19	36	4	12	9	40
10	34004298	34004637	ENSG00000203565	28305	ENSG00000203565	28305	28305	distal	33975992	+	28305	RP13-259N13.2	7	1	0	4	6	2	23	3	0	4	6	2	15
10	34023355	34023731	ENSG00000261683	24909	ENSG00000261683	24909	24909	distal	34061586	-	24909	LINC00838	19	9	4	27	18	12	65	6	9	7	5	6	30
10	34024132	34024818	ENSG00000261683	23822	ENSG00000261683	23822	23822	distal	34061586	-	23822	LINC00838	58	36	15	48	52	33	212	21	48	10	14	3	55
10	34042978	34043208	ENSG00000261683	5432	ENSG00000261683	5432	5432	distal	34061586	-	5432	LINC00838	1	2	2	0	1	1	2	6	5	5	2	0	18
10	34061623	34061899	ENSG00000261683	-36	ENSG00000261683	-36	-36	promoter	34061586	-	-36	LINC00838	7	4	2	17	10	0	11	2	4	2	3	0	7
10	3407807	3408132	ENSG00000227338	98599	ENSG00000227338	98599	98599	distal	3309207	+	98599	RP11-195B3.1	4	2	2	0	0	3	4	7	6	36	19	2	19
10	34229031	34229221	ENSG00000223470	22307	ENSG00000223470	22307	22307	distal	34206723	+	22307	RP11-490O24.2	1	0	2	3	3	1	3	0	9	2	7	6	13
10	34334666	34334814	ENSG00000148498	63673	ENSG00000148498	63673	127942	distal	35104253	-	63673	PARD3	1	0	0	1	5	8	4	3	7	5	2	3	22
10	34420797	34421344	ENSG00000148498	0	ENSG00000148498	0.968392	69563	distal	35104249	-	0.968392	PARD3	7	35	9	8	3	26	56	18	30	9	11	1	11
10	34430022	34430315	ENSG00000148498	0	ENSG00000148498	0.955321	60592	distal	35104249	-	0.955321	PARD3	6	30	3	7	2	10	21	5	13	10	5	4	19
10	34432377	34432729	ENSG00000148498	0	ENSG00000148498	0.951984	58178	distal	35104249	-	0.951984	PARD3	7	33	12	1	1	7	24	3	3	29	22	2	11
10	34470510	34470784	ENSG00000148498	0	ENSG00000148498	0.897953	20123	distal	35104249	-	0.897953	PARD3	5	4	5	4	4	0	1	2	2	9	5	2	26
10	34494057	34494312	ENSG00000148498	0	ENSG00000148498	0.864589	-3054	distal	35104249	-	0.864589	PARD3	2	11	2	5	2	17	6	3	1	18	11	1	6
10	34494837	34495538	ENSG00000148498	0	ENSG00000148498	0.863483	-3834	distal	35104249	-	0.863483	PARD3	21	3	4	37	26	32	24	5	9	13	11	1	17
10	34525928	34526164	ENSG00000148498	0	ENSG00000148498	0.81943	-34925	distal	35104249	-	0.81943	PARD3	0	16	2	1	3	1	4	4	7	4	7	0	15
10	34543637	34543878	ENSG00000148498	0	ENSG00000148498	0.794338	-52634	distal	35104249	-	0.794338	PARD3	0	12	3	3	0	1	4	8	10	2	0	2	31
10	34569452	34570142	ENSG00000148498	0	ENSG00000148498	0.838621	0.828236	promoter	34625248	-	0.838621	PARD3	15	24	9	8	9	16	2	47	86	1	4	5	5
10	34571242	34571503	ENSG00000148498	0	ENSG00000148498	0.811717	0.80778	promoter	34625248	-	0.811717	PARD3	15	23	11	11	13	8	11	13	21	5	3	4	32
10	34588005	34588544	ENSG00000148498	0	ENSG00000148498	0.559767	0.551651	promoter	34625248	-	0.559767	PARD3	26	8	4	16	7	16	60	28	51	21	18	2	64
10	345918	346174	ENSG00000151240	0	ENSG00000151240	0.937931	-17852	distal	735606	-	0.937931	DIP2C	7	24	4	9	2	2	0	4	5	1	3	8	3
10	34594018	34594485	ENSG00000148498	0	ENSG00000148498	0.469391	0.462357	promoter	34625248	-	0.469391	PARD3	22	21	9	8	2	4	18	4	2	42	40	2	17
10	34612246	34612538	ENSG00000148498	0	ENSG00000148498	0.978026	0.191018	promoter	35104249	-	0.978026	PARD3	1	20	5	6	1	4	3	7	7	2	3	4	0
10	34629119	34629362	ENSG00000148498	0	ENSG00000148498	0.944485	-3870	distal	35104249	-	0.944485	PARD3	7	17	4	19	4	4	7	14	19	9	9	3	17
10	34630258	34630729	ENSG00000148498	0	ENSG00000148498	0.942221	-5009	distal	35104249	-	0.942221	PARD3	10	13	4	5	5	5	11	29	44	9	17	5	8
10	34663948	34664303	ENSG00000148498	0	ENSG00000148498	0.875251	-2486	promoter	35104249	-	0.875251	PARD3	9	26	12	20	13	5	11	19	14	4	4	4	36
10	34736511	34736785	ENSG00000148498	0	ENSG00000148498	0.731007	-20851	distal	35104249	-	0.731007	PARD3	6	1	0	5	1	1	2	9	13	3	5	4	3
10	34793402	34793826	ENSG00000148498	0	ENSG00000148498	0.617916	-15595	distal	35104249	-	0.617916	PARD3	8	18	5	10	12	20	34	23	30	24	22	3	41
10	34813354	34813985	ENSG00000148498	0	ENSG00000148498	0.578255	-35547	distal	35104249	-	0.578255	PARD3	12	141	28	52	49	19	56	30	44	26	23	2	23
10	34817240	34817683	ENSG00000148498	0	ENSG00000148498	0.57053	-39433	distal	35104249	-	0.57053	PARD3	15	61	13	39	34	28	37	35	43	35	25	9	18
10	34826432	34827095	ENSG00000148498	0	ENSG00000148498	0.552257	-48625	distal	35104249	-	0.552257	PARD3	35	233	60	44	28	27	42	57	124	46	38	10	113
10	34827152	34827704	ENSG00000148498	0	ENSG00000148498	0.550826	-49345	distal	35104249	-	0.550826	PARD3	27	91	21	45	41	23	31	53	85	34	22	5	34
10	34828375	34829068	ENSG00000148498	0	ENSG00000148498	0.548395	-50568	distal	35104249	-	0.548395	PARD3	56	107	34	96	65	96	98	49	93	37	28	20	126
10	34835897	34836110	ENSG00000148498	0	ENSG00000148498	0.533443	-58090	distal	35104249	-	0.533443	PARD3	1	14	1	4	3	0	1	1	5	0	3	1	2
10	34864898	34865085	ENSG00000148498	0	ENSG00000148498	0.475793	-87091	distal	35104249	-	0.475793	PARD3	1	13	2	0	1	0	2	0	1	2	2	3	2
10	34874560	34874844	ENSG00000148498	0	ENSG00000148498	0.456586	77942	distal	35104249	-	0.456586	PARD3	2	37	9	13	3	3	7	7	10	10	5	0	7
10	34916328	34916681	ENSG00000148498	0	ENSG00000148498	0.373558	36105	distal	35104249	-	0.373558	PARD3	25	11	5	15	8	4	2	20	21	18	11	8	8
10	34926438	34926934	ENSG00000148498	0	ENSG00000148498	0.353461	25852	distal	35104249	-	0.353461	PARD3	19	68	28	47	38	25	63	24	25	36	56	11	55
10	34927350	34927682	ENSG00000148498	0	ENSG00000148498	0.351648	25104	distal	35104249	-	0.351648	PARD3	15	26	12	22	21	13	28	2	16	15	25	11	27
10	34939195	34939438	ENSG00000148498	0	ENSG00000148498	0.328102	13348	distal	35104249	-	0.328102	PARD3	4	1	1	4	3	8	16	10	18	3	4	4	2
10	34944456	34944738	ENSG00000148498	0	ENSG00000148498	0.317644	8048	distal	35104249	-	0.317644	PARD3	5	20	11	14	12	7	15	8	6	5	12	4	4
10	34955157	34956342	ENSG00000148498	0	ENSG00000148498	0.296372	-2127	promoter	35104249	-	0.296372	PARD3	30	200	46	28	39	47	118	76	107	65	70	4	103
10	34963011	34963497	ENSG00000148498	0	ENSG00000148498	0.280759	1065	distal	35104249	-	0.280759	PARD3	1	24	4	2	6	39	101	15	8	53	36	0	8
10	34973122	34973799	ENSG00000148498	0	ENSG00000148498	0.26066	-8152	distal	35104249	-	0.26066	PARD3	4	70	16	10	9	4	21	9	6	13	14	5	5
10	34985406	34985747	ENSG00000148498	0	ENSG00000148498	0.236242	-20436	distal	35104249	-	0.236242	PARD3	5	28	6	10	4	5	19	6	9	7	8	4	8
10	34994468	34995023	ENSG00000148498	0	ENSG00000148498	0.218228	-29498	distal	35104249	-	0.218228	PARD3	11	155	26	15	3	5	32	15	20	18	15	5	31
10	35005875	35006246	ENSG00000148498	0	ENSG00000148498	0.195552	-40905	distal	35104249	-	0.195552	PARD3	3	71	14	2	5	1	9	5	13	3	1	5	11
10	35012665	35013045	ENSG00000148498	0	ENSG00000148498	0.182055	-47695	distal	35104249	-	0.182055	PARD3	13	65	9	13	10	8	31	18	30	19	24	3	23
10	35022046	35022236	ENSG00000148498	0	ENSG00000148498	0.163407	-57076	distal	35104249	-	0.163407	PARD3	3	7	3	3	5	0	9	6	10	2	4	2	4
10	35029168	35029511	ENSG00000148498	0	ENSG00000148498	0.149249	-64198	distal	35104249	-	0.149249	PARD3	6	14	5	6	2	7	11	7	5	4	2	1	6
10	35047358	35047829	ENSG00000148498	0	ENSG00000148498	0.113091	0.0799408	promoter	35104249	-	0.113091	PARD3	9	35	7	19	13	11	24	59	57	14	9	6	14
10	35049696	35049965	ENSG00000148498	0	ENSG00000148498	0.108443	0.0769142	promoter	35104249	-	0.108443	PARD3	2	2	1	5	1	4	5	15	25	5	7	2	7
10	35069677	35070384	ENSG00000148498	0	ENSG00000148498	0.0687238	0.0479823	promoter	35104249	-	0.0687238	PARD3	28	85	11	17	14	15	50	35	47	46	25	7	40
10	35070920	35071085	ENSG00000148498	0	ENSG00000148498	0.0662529	0.0469891	promoter	35104249	-	0.0662529	PARD3	9	20	4	1	1	5	15	3	8	8	12	0	5
10	35098020	35098955	ENSG00000148498	0	ENSG00000148498	0.0123823	0.00749972	promoter	35104249	-	0.0123823	PARD3	26	91	22	29	20	10	46	52	68	50	30	9	58
10	35104592	35105108	ENSG00000226386	0	ENSG00000226386	-0.166397	0	promoter	35105314	+	-0.166397	PARD3-AS1	19	75	6	37	4	11	34	26	43	15	16	0	26
10	3511299	3511573	ENSG00000233321	17512	ENSG00000233321	17512	17512	distal	3545030	-	17512	RP11-482E14.1	0	0	0	9	6	29	11	0	7	8	17	1	10
10	35115143	35115370	ENSG00000226386	9828	ENSG00000226386	9828	9828	distal	35105314	+	9828	PARD3-AS1	1	14	5	1	3	4	5	0	3	1	1	3	1
10	35125128	35125542	ENSG00000226386	19813	ENSG00000226386	19813	19813	distal	35105314	+	19813	PARD3-AS1	2	33	8	5	3	1	0	5	3	5	3	4	1
10	3514648	3515143	ENSG00000233321	13942	ENSG00000233321	13942	13942	distal	3545030	-	13942	RP11-482E14.1	22	6	1	7	3	18	21	11	35	20	16	7	19
10	35152894	35153743	ENSG00000232525	-10394	ENSG00000232525	-10394	-10394	distal	35164350	+	-10394	SS18L2P1	0	67	12	7	3	6	15	27	50	19	9	3	14
10	35155926	35156108	ENSG00000232525	-8029	ENSG00000232525	-8029	-8029	distal	35164350	+	-8029	SS18L2P1	6	22	1	2	5	1	1	10	17	0	0	3	5
10	35161366	35162086	ENSG00000232525	-2051	ENSG00000232525	-2051	-2051	promoter	35164350	+	-2051	SS18L2P1	8	83	21	3	3	2	10	16	28	13	9	1	20
10	35186386	35186777	ENSG00000232525	22035	ENSG00000232525	22035	22035	distal	35164350	+	22035	SS18L2P1	2	22	4	0	2	0	1	5	3	7	4	1	4
10	3519980	3520490	ENSG00000233321	8595	ENSG00000233321	8595	8595	distal	3545030	-	8595	RP11-482E14.1	10	0	4	33	19	52	3	8	17	55	41	7	15
10	35240329	35240810	ENSG00000222909	8325	ENSG00000222909	8325	8325	distal	35232003	+	8325	RNU6-193P	16	23	3	8	4	4	40	31	45	14	13	7	49
10	3524495	3524985	ENSG00000233321	4100	ENSG00000233321	4100	4100	distal	3545030	-	4100	RP11-482E14.1	3	7	6	59	45	59	147	25	72	68	64	28	30
10	3526648	3527116	ENSG00000233321	1969	ENSG00000233321	1969	1969	distal	3545030	-	1969	RP11-482E14.1	6	1	2	29	27	47	63	3	10	15	10	8	2
10	35274746	35275043	ENSG00000213724	19558	ENSG00000213724	19558	19558	distal	35255187	+	19558	PRDX2P2	3	14	10	7	3	2	26	2	8	6	1	2	4
10	35283390	35284015	ENSG00000108094	13463	ENSG00000108094	13463	28202	distal	35360267	-	13463	CUL2	49	99	52	23	33	27	70	46	81	39	49	9	109
10	35372417	35372606	ENSG00000108094	0	ENSG00000108094	0.224478	-3808	distal	35378963	-	0.224478	CUL2	1	13	2	2	2	1	0	1	0	5	2	1	0
10	35378499	35378921	ENSG00000108094	0	ENSG00000108094	0.0159117	0.00140599	promoter	35378963	-	0.0159117	CUL2	12	112	19	16	6	20	23	10	18	23	15	9	19
10	35379318	35379825	ENSG00000108094	0	ENSG00000108094	0.00312028	0	promoter	35379570	-	0.00312028	CUL2	46	85	23	36	31	62	33	53	46	51	47	36	48
10	35381800	35382070	ENSG00000108094	-2229	ENSG00000108094	-2229	-2229	promoter	35379570	-	-2229	CUL2	12	70	26	5	4	8	27	6	12	9	10	7	3
10	35409305	35409592	ENSG00000230534	0	ENSG00000230534	0.741182	0.209138	promoter	35415588	-	0.741182	RP11-297A16.2	3	13	15	7	10	13	16	7	6	15	20	6	18
10	35415401	35416223	ENSG00000230534	0	ENSG00000230534	0.0220597	0	promoter	35415588	-	0.0220597	RP11-297A16.2	108	321	75	102	72	92	91	76	113	100	124	44	180
10	35416448	35416659	ENSG00000095794	0	ENSG00000095794	0.000510568	0.000498694	promoter	35500625	+	0.000510568	CREM	12	45	8	21	12	17	14	12	14	15	13	7	5
10	35416727	35416917	ENSG00000095794	0	ENSG00000095794	0.00382332	0.00381145	promoter	35500625	+	0.00382332	CREM	13	13	6	12	6	16	7	7	14	8	6	6	13
10	35420930	35421358	ENSG00000095794	0	ENSG00000095794	0.0537283	-3012	distal	35500625	+	0.0537283	CREM	19	93	15	39	22	22	36	17	33	28	26	15	60
10	35438134	35438831	ENSG00000095794	0	ENSG00000095794	0.0126854	0.0126696	promoter	35500788	+	0.0126854	CREM	43	302	78	81	61	76	102	68	119	98	96	29	160
10	35473341	35473812	ENSG00000095794	0	ENSG00000095794	0.241274	4569	distal	35500731	+	0.241274	CREM	14	64	17	7	8	3	8	11	12	27	33	8	10
10	35484434	35485332	ENSG00000095794	0	ENSG00000095794	-0.0577396	0	promoter	35500793	+	-0.0577396	CREM	49	400	117	103	124	87	186	97	161	129	130	42	43
10	35497482	35498006	ENSG00000095794	0	ENSG00000095794	0.785917	-1337	promoter	35500793	+	0.785917	CREM	50	23	15	9	15	4	5	21	38	14	12	11	36
10	35507345	35507714	ENSG00000233200	1107	ENSG00000233200	1107	7666	distal	35519526	-	1107	RP11-324I22.2	12	15	6	15	17	15	22	6	14	13	19	7	22
10	35514272	35514462	ENSG00000233200	0	ENSG00000233200	0.490845	0.473001	promoter	35519526	-	0.490845	RP11-324I22.2	4	2	0	2	1	0	1	12	10	2	3	0	2
10	35559043	35559538	ENSG00000108100	0	ENSG00000108100	0.081509	-19062	distal	35818964	+	0.081509	CCNY	7	13	3	5	11	29	3	11	19	8	7	3	33
10	35588951	35589460	ENSG00000108100	0	ENSG00000108100	0.187196	14019	distal	35818964	+	0.187196	CCNY	25	51	15	31	30	8	4	25	45	37	30	10	48
10	35605554	35605833	ENSG00000271335	0	ENSG00000271335	0.938583	0.634812	promoter	35625329	-	0.938583	RP11-324I22.4	8	35	5	9	3	4	1	4	8	9	6	4	13
10	35624892	35625121	ENSG00000271335	0	ENSG00000271335	0.0207414	0.00982486	promoter	35625329	-	0.0207414	RP11-324I22.4	4	15	5	11	6	4	2	6	1	8	6	0	11
10	35625138	35625364	ENSG00000271335	0	ENSG00000271335	0.00906545	0	promoter	35625329	-	0.00906545	RP11-324I22.4	4	14	2	2	3	6	2	4	6	2	8	2	14
10	35630319	35630906	ENSG00000108100	0	ENSG00000108100	0.0200758	0.0200712	promoter	35842111	+	0.0200758	CCNY	39	177	38	32	33	43	44	41	62	49	46	29	101
10	35640042	35640311	ENSG00000108100	0	ENSG00000108100	0.0650624	0.0650578	promoter	35842111	+	0.0650624	CCNY	2	49	12	0	2	1	2	2	2	2	3	7	3
10	35644880	35645257	ENSG00000108100	0	ENSG00000108100	0.087447	0.0874423	promoter	35842111	+	0.087447	CCNY	7	62	17	4	4	3	2	12	16	9	10	9	18
10	35668211	35668468	ENSG00000108100	0	ENSG00000108100	0.195395	0.195391	promoter	35842111	+	0.195395	CCNY	2	15	2	5	5	2	2	6	10	3	4	7	2
10	35698168	35698523	ENSG00000108100	0	ENSG00000108100	0.334001	-24515	distal	35842111	+	0.334001	CCNY	8	24	8	11	4	2	24	11	15	4	8	4	19
10	35740134	35740795	ENSG00000108100	0	ENSG00000108100	0.253072	0.253057	promoter	35790589	+	0.253072	CCNY	27	84	25	37	24	12	10	40	72	42	54	32	53
10	35751327	35751749	ENSG00000108100	0	ENSG00000108100	0.418771	0.418756	promoter	35790589	+	0.418771	CCNY	6	66	5	17	9	6	6	19	13	21	18	14	16
10	35773602	35774123	ENSG00000108100	0	ENSG00000108100	0.748527	-40765	distal	35790589	+	0.748527	CCNY	10	24	2	0	2	1	0	4	2	0	8	7	3
10	35784725	35785106	ENSG00000108100	0	ENSG00000108100	0.91319	-29782	distal	35790589	+	0.91319	CCNY	9	14	10	7	2	0	3	5	10	5	7	9	6
10	35812694	35812993	ENSG00000108100	0	ENSG00000108100	0.863893	-1895	promoter	35842111	+	0.863893	CCNY	6	11	0	4	1	1	0	3	11	4	16	10	7
10	35843512	35843767	ENSG00000108100	0	ENSG00000108100	0.675774	0.675746	promoter	35855213	+	0.675774	CCNY	7	14	6	10	8	5	2	17	16	12	10	12	12
10	35852310	35852515	ENSG00000108100	0	ENSG00000108100	0.91956	0.919532	promoter	35855213	+	0.91956	CCNY	4	17	3	1	9	5	7	16	8	9	8	0	5
10	35931154	35931579	ENSG00000177283	-791	ENSG00000177283	-791	-791	promoter	35930362	-	-791	FZD8	32	5	4	18	16	21	28	11	39	13	13	1	28
10	363212	363517	ENSG00000151240	0	ENSG00000151240	0.896307	7061	distal	735606	-	0.896307	DIP2C	2	12	4	20	19	3	1	11	8	2	6	23	23
10	36430820	36431006	ENSG00000227475	-52502	ENSG00000227475	-52502	-52502	distal	36378317	-	-52502	RP11-810B23.1	2	16	3	0	2	0	0	1	0	3	3	3	2
10	36434515	36434718	ENSG00000227475	-56197	ENSG00000227475	-56197	-56197	distal	36378317	-	-56197	RP11-810B23.1	1	20	3	1	0	4	0	5	6	1	4	1	1
10	36446500	36446770	ENSG00000227475	-68182	ENSG00000227475	-68182	-68182	distal	36378317	-	-68182	RP11-810B23.1	2	16	3	0	2	0	5	1	5	2	8	2	2
10	3665840	3666064	ENSG00000236892	-86616	ENSG00000236892	-86616	-86616	distal	3579223	-	-86616	RP11-482E14.2	2	6	3	6	6	21	9	7	11	3	2	4	13
10	3668298	3668947	ENSG00000236892	-89074	ENSG00000236892	-89074	-89074	distal	3579223	-	-89074	RP11-482E14.2	26	23	6	16	10	62	70	10	29	22	24	22	39
10	369843	370317	ENSG00000151240	0	ENSG00000151240	0.880347	261	promoter	735606	-	0.880347	DIP2C	18	16	2	31	22	24	6	37	46	13	8	25	39
10	37161734	37161927	ENSG00000238176	-67109	ENSG00000238176	-67109	-67109	distal	37232860	+	-67109	RP11-322I2.1	5	1	1	6	6	13	0	2	0	2	9	6	1
10	375377	375809	ENSG00000151240	0	ENSG00000151240	0.0182116	0	promoter	375466	-	0.0182116	DIP2C	0	61	16	1	2	22	2	3	3	7	12	12	19
10	3762714	3763017	ENSG00000229672	-30241	ENSG00000229672	-30241	-30241	distal	3805418	+	-30241	RP11-184A2.3	2	2	2	6	2	2	2	7	19	8	11	12	7
10	37778085	37778326	ENSG00000224920	-33612	ENSG00000224920	-33612	-33612	distal	37833629	+	-33612	TACC1P1	21	2	2	8	10	15	2	2	2	9	13	0	3
10	3782356	3782975	ENSG00000229672	-10283	ENSG00000229672	-10283	-10283	distal	3805418	+	-10283	RP11-184A2.3	1	17	10	28	30	17	31	38	77	73	63	8	9
10	3784147	3784688	ENSG00000229672	-8570	ENSG00000229672	-8570	-8570	distal	3805418	+	-8570	RP11-184A2.3	12	11	10	14	6	18	29	16	19	13	16	10	18
10	379183	379966	ENSG00000151240	0	ENSG00000151240	0.857867	-3716	distal	735606	-	0.857867	DIP2C	34	53	13	50	48	65	2	23	38	13	8	22	37
10	3791845	3792427	ENSG00000229672	-831	ENSG00000229672	-831	-831	promoter	3805418	+	-831	RP11-184A2.3	13	0	5	9	7	24	8	34	51	9	9	14	5
10	3797323	3797639	ENSG00000229672	0	ENSG00000229672	0.334238	0.334156	promoter	3805418	+	0.334238	RP11-184A2.3	5	31	8	10	14	10	5	24	28	6	9	4	9
10	3799617	3800648	ENSG00000229672	0	ENSG00000229672	0.522905	0.522823	promoter	3805418	+	0.522905	RP11-184A2.3	114	95	26	168	94	174	169	160	198	151	135	73	214
10	3803379	3803924	ENSG00000229672	0	ENSG00000229672	0.832305	-6182	distal	3805418	+	0.832305	RP11-184A2.3	100	87	39	81	52	109	69	116	176	145	133	72	199
10	38145967	38146880	ENSG00000198105	0	ENSG00000198105	0.0521505	0	promoter	38147034	-	0.0521505	ZNF248	84	311	67	86	68	115	103	83	132	103	91	39	144
10	38146958	38147281	ENSG00000198105	0	ENSG00000198105	0.00371457	0	promoter	38147034	-	0.00371457	ZNF248	9	41	9	16	13	14	9	12	10	14	17	9	17
10	38149821	38150094	ENSG00000236514	1782	ENSG00000236514	1782	-2786	distal	38148038	+	1782	RP11-162G10.5	20	5	5	12	4	13	4	4	2	34	32	9	76
10	38154812	38155358	ENSG00000236514	6773	ENSG00000236514	6773	-7777	distal	38148038	+	6773	RP11-162G10.5	58	95	22	31	16	30	1	44	42	73	51	30	87
10	3817560	3818538	ENSG00000067082	0	ENSG00000067082	1.06775	0.916844	promoter	3827473	-	1.06775	KLF6	34	34	22	100	66	149	24	136	182	109	107	20	43
10	3819255	3819541	ENSG00000067082	0	ENSG00000067082	0.885179	0.679223	promoter	3827473	-	0.885179	KLF6	3	10	9	35	18	44	36	38	43	28	35	9	5
10	3824599	3825748	ENSG00000067082	0	ENSG00000067082	0.822519	-355	promoter	3827375	-	0.822519	KLF6	147	276	112	64	43	67	174	72	106	100	102	51	152
10	38265089	38265992	ENSG00000175395	0	ENSG00000175395	0.0183178	0	promoter	38265520	-	0.0183178	ZNF25	160	594	123	166	144	200	181	135	226	179	186	75	322
10	3827218	3827821	ENSG00000067082	0	ENSG00000067082	0.0465185	0	promoter	3827375	-	0.0465185	KLF6	78	201	59	73	38	101	53	59	80	81	102	37	206
10	38299210	38300382	ENSG00000189180	0	ENSG00000189180	-0.00951208	0	promoter	38343466	+	-0.00951208	ZNF33A	160	485	99	165	118	180	193	148	218	161	171	84	216
10	38327113	38327798	ENSG00000189180	0	ENSG00000189180	0.584445	5002	distal	38345488	+	0.584445	ZNF33A	31	139	32	58	33	53	28	16	49	31	34	28	42
10	38382920	38383970	ENSG00000075407	0	ENSG00000075407	-0.0170676	0	promoter	38404313	+	-0.0170676	ZNF37A	107	295	75	71	56	135	102	75	123	111	108	60	155
10	3847367	3847791	ENSG00000067082	-19893	ENSG00000067082	-19893	-19893	distal	3827473	-	-19893	KLF6	30	57	30	73	41	80	39	73	109	61	56	58	68
10	3848070	3848477	ENSG00000067082	-20596	ENSG00000067082	-20596	-20596	distal	3827473	-	-20596	KLF6	34	105	30	77	38	84	55	85	81	51	32	29	54
10	3852252	3852819	ENSG00000230573	-23322	ENSG00000230573	-23322	-23322	distal	3876920	+	-23322	RP11-464C19.2	61	282	90	85	71	129	82	159	223	154	138	60	61
10	3853575	3854013	ENSG00000230573	-22128	ENSG00000230573	-22128	-22128	distal	3876920	+	-22128	RP11-464C19.2	25	59	23	23	10	29	27	45	67	20	21	29	49
10	38539861	38540186	ENSG00000226113	0	ENSG00000226113	0.0353267	-329	promoter	38622083	+	0.0353267	RP11-672F9.1	25	0	1	1	0	1	0	0	0	2	3	2	2
10	38644927	38645874	ENSG00000099251	0	ENSG00000099251	-0.0210604	0	promoter	38667035	+	-0.0210604	HSD17B7P2	216	318	70	117	71	217	167	125	142	167	152	57	264
10	38679642	38679854	ENSG00000120555	0	ENSG00000120555	0.686663	0.217564	promoter	38691844	-	0.686663	SEPT7P9	7	18	10	7	4	11	10	4	7	5	15	4	10
10	38680156	38680420	ENSG00000120555	0	ENSG00000120555	0.657738	0.161207	promoter	38691844	-	0.657738	SEPT7P9	3	19	2	5	2	4	2	1	4	2	5	0	5
10	38691200	38691919	ENSG00000120555	0	ENSG00000120555	0.0362409	0	promoter	38691844	-	0.0362409	SEPT7P9	86	252	52	66	55	80	74	77	90	56	83	27	132
10	38692008	38692417	ENSG00000120555	-163	ENSG00000120555	-163	-163	promoter	38691844	-	-163	SEPT7P9	55	117	21	31	32	38	48	32	44	51	45	28	88
10	3871091	3871284	ENSG00000230573	-4857	ENSG00000230573	-4857	-4857	distal	3876920	+	-4857	RP11-464C19.2	13	8	5	9	5	15	23	11	11	7	6	8	17
10	3874736	3874951	ENSG00000230573	-1190	ENSG00000230573	-1190	-1190	promoter	3876920	+	-1190	RP11-464C19.2	5	7	8	3	1	4	6	5	15	7	12	6	11
10	3893614	3893937	ENSG00000230573	16693	ENSG00000230573	16693	16693	distal	3876920	+	16693	RP11-464C19.2	12	8	4	8	7	10	1	25	39	12	16	17	6
10	3894462	3895035	ENSG00000230573	17541	ENSG00000230573	17541	17541	distal	3876920	+	17541	RP11-464C19.2	92	235	67	108	135	129	69	118	195	122	150	64	199
10	3908586	3908912	ENSG00000230573	31665	ENSG00000230573	31665	31665	distal	3876920	+	31665	RP11-464C19.2	5	3	2	60	31	39	1	43	64	6	11	11	15
10	3909779	3910922	ENSG00000230573	32858	ENSG00000230573	32858	32858	distal	3876920	+	32858	RP11-464C19.2	83	81	37	160	115	193	177	136	200	158	137	73	26
10	3915839	3916409	ENSG00000230573	38918	ENSG00000230573	38918	38918	distal	3876920	+	38918	RP11-464C19.2	65	84	64	72	38	110	94	85	133	84	79	37	126
10	3917013	3917979	ENSG00000230573	40092	ENSG00000230573	40092	40092	distal	3876920	+	40092	RP11-464C19.2	122	236	92	165	105	141	163	85	135	110	94	79	135
10	3930002	3930582	ENSG00000226005	-46128	ENSG00000226005	-46128	-46128	distal	3978005	+	-46128	RP11-464C19.3	11	42	17	38	21	22	6	17	31	9	8	13	16
10	3944442	3945309	ENSG00000226005	-31401	ENSG00000226005	-31401	-31401	distal	3978005	+	-31401	RP11-464C19.3	31	54	12	64	58	87	78	105	181	73	61	70	27
10	3977276	3977788	ENSG00000226005	0	ENSG00000226005	0.436631	0.435858	promoter	3978005	+	0.436631	RP11-464C19.3	20	50	8	30	30	65	68	32	70	35	33	40	41
10	4005412	4005800	ENSG00000226005	27406	ENSG00000226005	27406	27406	distal	3978005	+	27406	RP11-464C19.3	4	5	1	13	14	19	5	3	5	2	4	6	3
10	4018830	4019275	ENSG00000226005	40824	ENSG00000226005	40824	40824	distal	3978005	+	40824	RP11-464C19.3	5	2	2	17	15	37	10	25	30	7	9	11	7
10	4075564	4076014	ENSG00000227101	4977	ENSG00000227101	4977	4977	distal	4070586	+	4977	RP11-433J20.2	15	39	10	23	14	13	28	39	56	41	27	9	56
10	4077058	4077495	ENSG00000227101	6471	ENSG00000227101	6471	6471	distal	4070586	+	6471	RP11-433J20.2	8	2	2	3	4	1	2	38	60	19	10	9	26
10	4109237	4109521	ENSG00000236990	0	ENSG00000236990	0.41084	0.410813	promoter	4131205	+	0.41084	RP11-433J20.1	2	1	1	6	4	7	2	3	18	5	1	3	5
10	4109605	4110097	ENSG00000236990	0	ENSG00000236990	0.42071	0.420683	promoter	4131205	+	0.42071	RP11-433J20.1	1	3	4	9	3	4	1	17	24	5	8	10	7
10	4144071	4144414	ENSG00000236990	12865	ENSG00000236990	12865	12865	distal	4131205	+	12865	RP11-433J20.1	17	37	15	14	10	13	14	12	20	27	14	6	23
10	4163528	4164207	ENSG00000236990	32322	ENSG00000236990	32322	32322	distal	4131205	+	32322	RP11-433J20.1	13	63	33	46	24	26	23	32	38	18	24	21	25
10	4170182	4170531	ENSG00000236990	38976	ENSG00000236990	38976	38976	distal	4131205	+	38976	RP11-433J20.1	3	91	11	8	1	3	1	4	5	4	3	4	6
10	4173692	4174384	ENSG00000236990	42486	ENSG00000236990	42486	42486	distal	4131205	+	42486	RP11-433J20.1	55	152	32	30	19	50	66	66	85	84	83	27	54
10	4178398	4178625	ENSG00000236990	47192	ENSG00000236990	47192	47192	distal	4131205	+	47192	RP11-433J20.1	14	27	6	9	5	18	43	7	22	22	19	12	41
10	4179528	4179751	ENSG00000236990	48322	ENSG00000236990	48322	48322	distal	4131205	+	48322	RP11-433J20.1	1	4	1	0	5	4	21	5	3	4	1	2	1
10	4217607	4217804	ENSG00000233117	25528	ENSG00000233117	25528	59947	distal	4286104	-	25528	LINC00702	3	2	1	2	1	1	0	6	7	20	5	3	2
10	4218683	4219099	ENSG00000233117	24233	ENSG00000233117	24233	58652	distal	4286104	-	24233	LINC00702	5	7	2	4	7	6	0	19	18	33	13	15	18
10	4263631	4263896	ENSG00000233117	0	ENSG00000233117	0.525426	13855	distal	4286104	-	0.525426	LINC00702	2	9	5	2	6	2	16	1	5	2	0	2	5
10	42674000	42674193	ENSG00000237592	-6593	ENSG00000237592	-6593	-6593	distal	42681239	+	-6593	IGKV1OR10-1	3	4	1	4	2	19	9	5	9	11	19	6	6
10	42678937	42679562	ENSG00000237592	-1224	ENSG00000237592	-1224	-1224	promoter	42681239	+	-1224	IGKV1OR10-1	25	41	15	25	15	51	17	16	14	17	20	18	41
10	4284478	4284699	ENSG00000233117	0	ENSG00000233117	0.167883	0.140418	promoter	4285835	-	0.167883	LINC00702	6	17	10	5	3	1	9	8	16	3	3	3	10
10	42863299	42863655	ENSG00000215146	0	ENSG00000215146	0.00692795	0	promoter	42863404	-	0.00692795	RP11-313J2.1	1	10	2	3	2	18	0	0	0	3	3	3	8
10	4289094	4289482	ENSG00000233117	-2989	ENSG00000233117	-2989	-2989	distal	4286104	-	-2989	LINC00702	5	17	3	11	13	12	15	14	36	10	7	1	11
10	4292526	4293061	ENSG00000233117	-6421	ENSG00000233117	-6421	-6421	distal	4286104	-	-6421	LINC00702	30	111	38	7	5	1	31	6	5	26	29	3	27
10	42984328	42984518	ENSG00000185904	0	ENSG00000185904	0.672417	0.672367	promoter	42990784	+	0.672417	LINC00839	4	1	1	1	1	0	1	6	8	5	2	5	2
10	43047540	43048656	ENSG00000234420	0	ENSG00000234420	0.0223855	0	promoter	43048256	-	0.0223855	ZNF37BP	91	286	54	92	48	117	87	74	104	88	86	50	149
10	43133363	43134453	ENSG00000272373	0	ENSG00000272373	0.374856	0	promoter	43134016	-	0.374856	ZNF33B	148	474	84	102	91	146	137	102	171	124	104	30	245
10	43160684	43160966	ENSG00000232109	3459	ENSG00000232109	3459	3459	distal	43157224	+	3459	AL022344.2	4	15	2	0	0	8	3	1	1	3	6	5	3
10	43187043	43187552	ENSG00000233515	0	ENSG00000233515	0.00730343	0	promoter	43187171	-	0.00730343	AL022344.4	8	22	7	4	3	7	98	4	4	33	29	4	125
10	43277759	43278499	ENSG00000165733	0	ENSG00000165733	-0.0093985	0	promoter	43330385	+	-0.0093985	BMS1	64	195	35	56	39	85	85	42	74	72	59	17	107
10	43278539	43278741	ENSG00000165733	0	ENSG00000165733	0.00556238	0.00554319	promoter	43330385	+	0.00556238	BMS1	2	11	5	6	5	1	7	1	9	4	1	1	4
10	43362178	43362365	ENSG00000234944	-4603	ENSG00000234944	-4603	-4603	distal	43369508	+	-4603	RP11-124O11.1	12	12	3	4	3	3	9	1	6	8	8	0	9
10	43456585	43456731	ENSG00000229630	17733	ENSG00000229630	17733	17733	distal	43476955	-	17733	RP11-124O11.2	8	0	2	2	4	2	2	2	0	4	1	1	10
10	43471050	43471400	ENSG00000229630	3064	ENSG00000229630	3064	3064	distal	43476955	-	3064	RP11-124O11.2	3	1	2	0	2	2	3	3	0	0	4	1	31
10	4352542	4352699	ENSG00000233117	-66437	ENSG00000233117	-66437	-66437	distal	4286104	-	-66437	LINC00702	3	0	0	2	0	4	11	1	1	1	1	0	1
10	43600619	43601246	ENSG00000165731	0	ENSG00000165731	0.249716	0.249147	promoter	43601938	+	0.249716	RET	20	142	28	24	20	37	24	22	15	22	15	10	33
10	43605935	43606130	ENSG00000165731	0	ENSG00000165731	0.662529	3996	distal	43622952	+	0.662529	RET	8	14	1	5	2	4	7	5	0	4	6	4	6
10	43616205	43616725	ENSG00000165731	0	ENSG00000165731	0.866197	14266	distal	43622952	+	0.866197	RET	3	50	18	4	7	5	11	4	6	6	10	3	3
10	4362103	4362572	ENSG00000224382	-63865	ENSG00000224382	-63865	-63865	distal	4452804	+	-63865	LINC00703	7	36	8	4	4	19	19	20	21	30	28	4	23
10	43624517	43625049	ENSG00000165731	0	ENSG00000165731	0.975958	7222	distal	43625799	+	0.975958	RET	8	49	17	5	8	6	18	13	17	15	16	1	27
10	43633363	43633528	ENSG00000273008	0	ENSG00000273008	0.277483	0.16755	promoter	43633782	-	0.277483	RP11-351D16.3	2	21	5	8	6	4	3	4	12	3	12	7	3
10	43633664	43633889	ENSG00000273008	0	ENSG00000273008	0.0781457	0	promoter	43633782	-	0.0781457	RP11-351D16.3	8	24	4	13	3	8	13	5	18	10	8	6	16
10	43634172	43634673	ENSG00000169826	0	ENSG00000169826	0.00508308	0.00506172	promoter	43680756	+	0.00508308	CSGALNACT2	28	66	13	20	13	21	51	32	37	30	38	9	27
10	43635972	43636188	ENSG00000169826	0	ENSG00000169826	0.0435265	0.0435052	promoter	43680756	+	0.0435265	CSGALNACT2	3	40	7	12	7	4	11	2	14	22	25	4	19
10	43661979	43662686	ENSG00000169826	0	ENSG00000169826	0.598971	0.598949	promoter	43680756	+	0.598971	CSGALNACT2	4	33	7	19	8	9	18	9	12	35	28	7	7
10	43697780	43698035	ENSG00000198915	0	ENSG00000198915	0.41032	0.0263601	promoter	43699267	-	0.41032	RASGEF1A	7	22	4	6	10	0	5	3	12	5	9	3	7
10	43698097	43698341	ENSG00000198915	0	ENSG00000198915	0.322848	0	promoter	43699267	-	0.322848	RASGEF1A	2	17	5	6	5	3	4	7	4	3	3	3	3
10	43721285	43721478	ENSG00000198915	0	ENSG00000198915	0.567564	0.105329	promoter	43762367	-	0.567564	RASGEF1A	5	19	4	10	10	0	2	4	5	2	1	0	3
10	4374993	4375200	ENSG00000224382	-51237	ENSG00000224382	-51237	-51237	distal	4452804	+	-51237	LINC00703	7	7	3	0	1	1	4	0	0	3	1	0	5
10	4375264	4375523	ENSG00000224382	-50914	ENSG00000224382	-50914	-50914	distal	4452804	+	-50914	LINC00703	6	8	2	3	0	0	5	1	1	0	7	3	1
10	43755574	43755932	ENSG00000198915	0	ENSG00000198915	0.093848	0.0888883	promoter	43762367	-	0.093848	RASGEF1A	4	35	6	5	3	1	5	0	1	13	12	2	4
10	43782572	43783280	ENSG00000198915	-20204	ENSG00000198915	-20204	-20204	distal	43762367	-	-20204	RASGEF1A	16	232	30	4	3	7	5	11	15	26	21	10	29
10	43788686	43789087	ENSG00000198915	-26318	ENSG00000198915	-26318	-26318	distal	43762367	-	-26318	RASGEF1A	6	43	9	11	6	13	14	10	6	6	9	9	14
10	43843922	43844211	ENSG00000221468	6563	ENSG00000221468	6563	6563	distal	43837358	+	6563	RNU6ATAC11P	20	29	8	9	10	11	15	2	6	13	13	5	14
10	43857136	43857326	ENSG00000150201	-9763	ENSG00000150201	-9763	-9763	distal	43871780	+	-9763	FXYD4	3	15	4	2	4	1	1	2	0	3	4	2	2
10	43857495	43858146	ENSG00000150201	-8943	ENSG00000150201	-8943	-8943	distal	43871780	+	-8943	FXYD4	35	148	27	33	29	8	8	7	17	46	48	18	103
10	43876114	43876506	ENSG00000150201	4330	ENSG00000150201	4330	4330	distal	43871783	+	4330	FXYD4	7	2	2	3	4	2	18	3	2	27	38	1	27
10	43891269	43892188	ENSG00000169813	0	ENSG00000169813	0.108568	0.00828428	promoter	43892265	-	0.108568	HNRNPF	37	157	31	49	20	76	32	42	46	39	32	31	60
10	43892658	43893011	ENSG00000169813	0	ENSG00000169813	0.00701827	0	promoter	43892726	-	0.00701827	HNRNPF	27	70	14	27	18	29	25	23	19	29	20	9	35
10	43899367	43899663	ENSG00000169813	0	ENSG00000169813	0.226711	0.162283	promoter	43904614	-	0.226711	HNRNPF	32	120	22	12	13	4	23	19	25	14	17	8	12
10	43899996	43900397	ENSG00000169813	0	ENSG00000169813	0.199533	0.129223	promoter	43904614	-	0.199533	HNRNPF	32	141	23	14	6	17	29	20	26	29	28	16	50
10	43903106	43903450	ENSG00000169813	0	ENSG00000169813	0.0651573	0	promoter	43904614	-	0.0651573	HNRNPF	51	92	17	46	28	35	36	25	40	31	31	18	70
10	43904119	43904961	ENSG00000169813	0	ENSG00000169813	0.0213878	0	promoter	43904614	-	0.0213878	HNRNPF	79	226	43	72	44	83	88	63	84	104	103	28	167
10	43915738	43916710	ENSG00000230555	0	ENSG00000230555	-0.328928	0	promoter	43917548	+	-0.328928	RP11-517P14.2	57	207	54	53	32	43	67	71	74	59	61	29	95
10	43922675	43923075	ENSG00000230555	5126	ENSG00000230555	5126	5126	distal	43917548	+	5126	RP11-517P14.2	3	19	5	1	1	1	12	3	11	1	1	7	7
10	43931939	43932785	ENSG00000243660	0	ENSG00000243660	-0.0172476	0	promoter	43971278	+	-0.0172476	ZNF487	72	205	67	71	33	76	86	47	64	79	101	19	138
10	43935272	43935493	ENSG00000243660	0	ENSG00000243660	0.0689388	0.0689129	promoter	43971278	+	0.0689388	ZNF487	3	44	13	1	0	0	2	1	0	3	6	1	16
10	43939726	43940119	ENSG00000243660	0	ENSG00000243660	0.184113	0.184087	promoter	43971278	+	0.184113	ZNF487	2	64	13	4	6	3	1	5	1	3	2	4	3
10	43947460	43948004	ENSG00000243660	0	ENSG00000243660	0.0335277	0.0331633	promoter	43950112	+	0.0335277	ZNF487	36	176	54	49	29	25	17	3	8	29	31	20	31
10	43950728	43951507	ENSG00000243660	0	ENSG00000243660	0.468608	-2005	promoter	43971278	+	0.468608	ZNF487	61	234	43	55	36	28	81	45	55	59	66	31	167
10	43957393	43957698	ENSG00000243660	0	ENSG00000243660	0.640955	3815	distal	43971278	+	0.640955	ZNF487	6	12	6	13	4	2	16	5	8	12	14	7	19
10	4396037	4396428	ENSG00000224382	-30009	ENSG00000224382	-30009	-30009	distal	4452804	+	-30009	LINC00703	3	1	2	0	2	6	42	3	10	25	26	2	1
10	4396538	4396883	ENSG00000224382	-29554	ENSG00000224382	-29554	-29554	distal	4452804	+	-29554	LINC00703	4	6	2	0	4	4	22	2	3	4	7	4	1
10	44090609	44091158	ENSG00000232004	9132	ENSG00000232004	9132	9132	distal	44101699	-	9132	CAP1P2	56	18	17	14	21	30	30	24	41	37	36	21	88
10	44101763	44102141	ENSG00000198298	0	ENSG00000198298	-0.00967152	0	promoter	44113351	+	-0.00967152	ZNF485	15	2	0	7	5	10	10	11	13	8	11	2	38
10	44118812	44118966	ENSG00000223910	-5298	ENSG00000223910	-5298	-5298	distal	44170151	+	-5298	ZNF32-AS3	11	1	1	2	1	0	6	5	4	3	14	8	8
10	44144238	44144624	ENSG00000169740	0	ENSG00000169740	0.0132079	0	promoter	44144304	-	0.0132079	ZNF32	25	7	0	27	14	21	28	20	26	25	26	13	34
10	44167172	44167384	ENSG00000223910	0	ENSG00000223910	0.935078	4718	distal	44170151	+	0.935078	ZNF32-AS3	6	6	6	10	6	6	19	7	3	5	13	4	5
10	44185483	44185646	ENSG00000223910	15331	ENSG00000223910	15331	23029	distal	44170151	+	15331	ZNF32-AS3	3	2	2	7	3	8	11	0	3	5	7	3	5
10	44476777	44476991	ENSG00000233395	36862	ENSG00000233395	36862	36862	distal	44439914	+	36862	LINC00841	11	5	3	7	4	4	1	6	3	2	4	3	18
10	44497011	44497193	ENSG00000238957	-32794	ENSG00000238957	-32794	-32794	distal	44530059	+	-32794	AL512640.1	1	13	2	0	0	0	0	3	3	0	2	0	1
10	44503783	44504173	ENSG00000238957	-25814	ENSG00000238957	-25814	-25814	distal	44530059	+	-25814	AL512640.1	45	47	17	39	37	45	7	28	41	3	2	10	51
10	44506268	44507116	ENSG00000238957	-22871	ENSG00000238957	-22871	-22871	distal	44530059	+	-22871	AL512640.1	175	182	45	103	113	172	7	99	180	4	8	45	116
10	44512462	44512780	ENSG00000238957	-17207	ENSG00000238957	-17207	-17207	distal	44530059	+	-17207	AL512640.1	12	8	6	4	2	10	2	21	20	3	2	8	12
10	44515844	44516154	ENSG00000238957	-13833	ENSG00000238957	-13833	-13833	distal	44530059	+	-13833	AL512640.1	13	4	2	2	12	18	0	2	2	3	3	4	7
10	44525590	44525929	ENSG00000238957	-4058	ENSG00000238957	-4058	-4058	distal	44530059	+	-4058	AL512640.1	22	3	1	7	15	16	0	10	16	3	7	7	22
10	44796572	44796947	ENSG00000107562	0	ENSG00000107562	0.959592	-7414	distal	44880497	-	0.959592	CXCL12	2	0	1	12	17	12	3	7	5	0	4	7	4
10	44806665	44806874	ENSG00000107562	0	ENSG00000107562	0.84419	-17507	distal	44880497	-	0.84419	CXCL12	12	0	2	7	7	2	15	3	3	1	3	5	12
10	4493281	4493874	ENSG00000230096	-24909	ENSG00000230096	-24909	-24909	distal	4468371	-	-24909	RP11-34C15.2	5	3	3	8	10	21	79	22	26	21	30	7	6
10	45033310	45033510	ENSG00000270767	-49416	ENSG00000270767	-49416	-49416	distal	44983893	-	-49416	RP11-733D4.2	2	13	1	1	1	1	1	0	0	0	6	0	3
10	45178150	45178538	ENSG00000234580	-80597	ENSG00000234580	-80597	-80597	distal	45097552	-	-80597	RP11-733D4.1	4	1	1	2	4	19	4	4	2	2	3	4	6
10	45359763	45359914	ENSG00000224812	0	ENSG00000224812	0.641536	-46733	distal	45455137	-	0.641536	TMEM72-AS1	0	2	1	1	0	4	3	3	0	0	1	0	4
10	45359963	45360647	ENSG00000224812	0	ENSG00000224812	0.640191	-46000	distal	45455137	-	0.640191	TMEM72-AS1	15	25	5	17	9	42	62	25	17	17	13	19	33
10	45392454	45392878	ENSG00000224812	0	ENSG00000224812	0.421639	-13769	distal	45455137	-	0.421639	TMEM72-AS1	2	3	3	4	5	19	56	12	16	4	5	5	3
10	45428126	45428575	ENSG00000224812	0	ENSG00000224812	0.18169	0.259655	promoter	45455137	-	0.18169	TMEM72-AS1	14	49	9	17	13	13	34	11	17	17	17	16	41
10	45441630	45442004	ENSG00000224812	0	ENSG00000224812	0.0908553	0.476094	promoter	45455137	-	0.0908553	TMEM72-AS1	4	9	4	6	1	2	2	19	33	3	7	3	29
10	45454589	45455395	ENSG00000273363	0	ENSG00000273363	0.585952	0	promoter	45454906	-	0.585952	RP11-285G1.14	51	209	39	48	26	63	57	49	71	63	49	26	96
10	45456587	45456995	ENSG00000107551	0	ENSG00000107551	0.0440156	0.0439817	promoter	45484822	+	0.0440156	RASSF4	3	142	28	3	3	4	6	2	3	3	5	5	3
10	45458786	45459276	ENSG00000107551	0	ENSG00000107551	0.11847	0.118436	promoter	45484822	+	0.11847	RASSF4	24	133	18	32	21	30	53	32	46	9	18	14	68
[truncated: 89,634 more rows]

## Sheet: Supp Data 7 v2 - RPPM
Supplementary Data 7. ATAC-seq data for Emory patients - reads per peak million (RPPM)
chr	start	end	GRCh37.tsKg	GRCh37.tsRelPos	GRCh37.tssRelPos	GRCh37.prom	GRCh37.tsStart	GRCh37.tsEnd	GRCh37.tsStrand	GRCh37.tsRelPos	GRCh37.tsSymbol	1539	1555-fresh	1555	1557-fresh	1557	1560-fresh	1561	1562-fresh	1562	1563-fresh	1563	1573	1575
10	100013919	100014376	ENSG00000138131	0.685214	0.469684	promoter	100007447	100028007	-	0.685214	LOXL4	0	7.74445	4.07632	1.22082	1.08595	0	5.56007	0	0.707759	1.27184	1.68936	2.80675	4.20611
10	100022349	100022722	ENSG00000138131	0.275195	0.257004	promoter	100007447	100028007	-	0.275195	LOXL4	5.22071	3.71088	6.11448	3.66246	3.80082	0.995364	12.4032	1.02309	5.66207	3.81551	2.95638	5.6135	3.00437
10	100028220	100028619	ENSG00000138131	-212	-212	promoter	100007447	100028007	-	-212	LOXL4	6.78692	6.7764	4.07632	8.1388	4.88676	1.65894	5.98777	5.62701	4.60043	3.39157	5.06808	4.21013	4.20611
10	100055286	100055644	ENSG00000138131	-27278	-27278	distal	100007447	100028007	-	-27278	LOXL4	4.69864	3.71088	2.03816	4.88328	7.05866	2.6543	2.13849	7.16165	8.13923	3.39157	3.80106	8.42025	4.80698
10	100059601	100059873	ENSG00000138131	-31593	-31593	distal	100007447	100028007	-	-31593	LOXL4	0.522071	4.35626	6.11448	0.40694	1.08595	0	1.28309	0.511546	0.353879	0.847892	1.68936	0.701688	1.20175
10	100069341	100069542	ENSG00000138131	-41333	-41333	distal	100007447	100028007	-	-41333	LOXL4	0.522071	0.806714	0.679387	4.88328	4.88676	3.31788	2.56619	0.511546	2.47716	0.423946	2.53404	3.50844	0.600873
10	100083058	100083204	ENSG00000138131	-55050	-55050	distal	100007447	100028007	-	-55050	LOXL4	2.61036	0.806714	0	1.62776	2.71487	0.663576	3.84928	1.02309	0.707759	0.847892	0.42234	2.10506	3.90567
10	100091729	100091939	ENSG00000119943	51382	55018	distal	100143322	100171634	-	51382	PYROXD2	2.08828	0.806714	0.679387	4.0694	4.88676	0.331788	0.427698	1.02309	2.12328	2.11973	2.1117	11.227	1.50218
10	100099535	100100610	ENSG00000119943	42711	46347	distal	100143322	100171634	-	42711	PYROXD2	81.9652	66.1505	72.015	43.5426	41.809	42.1371	94.949	36.3198	50.6048	48.7538	41.3893	32.9793	76.9118
10	100100728	100100923	ENSG00000119943	42398	46034	distal	100143322	100171634	-	42398	PYROXD2	4.17657	4.35626	6.11448	2.44164	2.71487	0.995364	10.6925	1.02309	2.12328	2.11973	2.1117	2.10506	4.80698
10	100120974	100121591	ENSG00000119943	21730	25366	distal	100143322	100171634	-	21730	PYROXD2	39.6774	0.645371	1.35877	32.5552	52.6684	41.4735	88.1058	9.20783	6.01595	13.5663	17.7383	20.3489	51.9755
10	100163485	100164638	ENSG00000119943	0.362314	0.247068	promoter	100143322	100174941	-	0.362314	PYROXD2	20.8828	0.645371	1.35877	1.22082	2.17189	0.663576	16.2525	43.4814	43.1733	13.9902	13.9372	6.31519	1.80262
10	100171325	100171605	ENSG00000119943	0.114362	0.00098898	promoter	100143322	100174941	-	0.114362	PYROXD2	2.08828	0.484028	2.03816	1.62776	1.62892	1.99073	8.12626	3.06928	2.47716	2.54367	3.80106	2.80675	0.600873
10	100174775	100175158	ENSG00000119943	0.141271	0	promoter	100173924	100174915	-	0.141271	PYROXD2	1.04414	0.161343	1.35877	1.22082	1.08595	0	0.855396	13.8118	8.84699	5.08735	5.06808	7.71857	5.70829
10	100185549	100185732	ENSG00000107521	1.00544	0.05713	promoter	100185663	100206630	-	1.00544	HPS1	1.56621	1.77477	2.03816	4.88328	2.71487	0.663576	5.56007	0	2.12328	2.11973	5.06808	0.701688	0.90131
10	100206074	100206703	ENSG00000107521	0.134391	0	promoter	100202145	100206684	-	0.134391	HPS1	18.2725	13.7141	9.51142	15.0568	15.7462	6.96755	9.83706	16.881	13.0935	13.5663	17.316	16.8405	17.1249
10	100220507	100220941	ENSG00000172987	0.998485	-13822	distal	100219331	100995559	-	0.998485	HPSE2	4.17657	1.1294	3.39694	5.29022	6.51568	2.6543	14.114	3.58082	4.24655	6.35919	8.02447	4.91182	1.50218
10	100227100	100227574	ENSG00000172987	0.989991	-20415	distal	100219331	100995559	-	0.989991	HPSE2	9.91935	5.32431	4.75571	8.95268	13.5743	5.30861	15.8248	6.6501	5.30819	5.93524	10.9808	8.42025	7.21048
10	100396683	100397254	ENSG00000172987	0.771521	-189998	distal	100219331	100995559	-	0.771521	HPSE2	4.17657	0	2.03816	4.0694	6.51568	14.5987	8.12626	7.16165	6.72371	4.6634	6.3351	2.10506	2.70393
10	100424198	100424511	ENSG00000172987	0.736074	-217513	distal	100219331	100995559	-	0.736074	HPSE2	10.4414	1.45209	2.71755	6.51104	4.88676	2.32252	2.56619	4.09237	3.53879	3.81551	5.49042	2.80675	6.91004
10	100654496	100654721	ENSG00000172987	0.439385	118138	distal	100219331	100995559	-	0.439385	HPSE2	0.522071	1.77477	2.03816	0	0.542974	0.331788	1.71079	1.02309	1.06164	1.27184	3.37872	3.50844	0.300437
10	101130851	101131181	ENSG00000119946	0.30664	0.306529	promoter	101128094	101137085	+	0.30664	CNNM1	3.6545	0.968057	0.679387	0.40694	3.25784	2.32252	6.41547	1.53464	1.06164	2.54367	3.37872	2.80675	8.71266
10	101152378	101152669	ENSG00000119946	0.973714	4552	distal	101089145	101154085	+	0.973714	CNNM1	5.74278	1.45209	1.35877	6.51104	2.17189	2.6543	5.98777	2.55773	2.47716	5.08735	5.06808	6.31519	3.3048
10	101190116	101191014	ENSG00000120053	0.0255866	0	promoter	101180024	101190381	-	0.0255866	GOT1	96.5831	113.424	82.2058	83.0158	110.767	58.7265	96.6598	86.9629	84.9311	91.5723	86.5798	70.8705	106.655
10	101300730	101300881	ENSG00000119919	4451	4451	distal	101292690	101296278	+	4451	NKX2-3	3.13243	0	0	2.44164	0.542974	0.663576	5.56007	1.02309	0	1.69578	0.844681	1.40338	1.50218
10	101315699	101316104	ENSG00000119919	19420	19420	distal	101292690	101296278	+	19420	NKX2-3	5.22071	3.87223	10.8702	1.62776	3.80082	0.995364	5.13238	3.58082	2.47716	6.78313	8.44681	2.10506	15.3223
10	101372087	101372344	ENSG00000155287	0.860335	0.785596	promoter	101370743	101380366	-	0.860335	SLC25A28	2.61036	3.22686	2.71755	1.22082	4.34379	2.6543	3.84928	2.04619	1.06164	5.5113	5.06808	1.40338	2.70393
10	101378828	101379114	ENSG00000155287	0.163881	0.0819996	promoter	101373226	101379926	-	0.163881	SLC25A28	19.8387	17.425	17.6641	11.8013	6.51568	5.97219	9.40936	16.3695	12.7397	20.3494	23.6511	11.9287	21.6314
10	101380169	101380775	ENSG00000155287	0.0204718	0	promoter	101370743	101380366	-	0.0204718	SLC25A28	104.414	95.5149	102.587	85.0505	93.3915	52.7543	98.7983	85.4282	105.456	92.8441	87.0021	59.6435	128.587
10	101380881	101381251	ENSG00000260475	0.0799537	0.0787949	promoter	101380812	101381675	+	0.0799537	RP11-85A1.3	24.0153	16.6183	14.9465	18.3123	14.6603	11.9444	15.3971	12.7887	15.2168	19.5015	17.316	18.2439	18.3266
10	101418629	101419476	ENSG00000198018	-0.0135661	0	promoter	101419263	101465997	+	-0.0135661	ENTPD7	48.5526	47.9188	29.2136	46.7981	36.9222	23.557	35.0712	26.0889	33.9724	39.003	36.7436	25.9625	42.662
10	101442631	101442786	ENSG00000198018	0.500021	14377	distal	101419263	101465997	+	0.500021	ENTPD7	3.13243	0.645371	1.35877	0.40694	1.62892	0.331788	4.70468	0.511546	0.353879	2.54367	1.26702	0.701688	0.600873
10	101469629	101469953	ENSG00000119929	0.179419	4455	distal	101462315	101503080	+	0.179419	CUTC	3.13243	0.645371	1.35877	3.25552	4.34379	2.98609	11.5478	1.02309	1.06164	2.96762	5.49042	1.40338	0.300437
10	101491578	101492712	ENSG00000014919	0.0150121	0	promoter	101473272	101491857	-	0.0150121	COX15	42.2878	34.5274	39.4044	38.6593	29.3206	22.8934	38.4928	36.8313	34.6802	35.6114	42.6564	29.4709	29.7432
10	101537764	101537945	ENSG00000023839	-4543	-4543	distal	101542489	101611949	+	-4543	ABCC2	3.6545	4.19491	2.03816	3.25552	1.62892	0.663576	0	2.04619	1.06164	2.54367	1.26702	2.80675	2.40349
10	101539160	101539453	ENSG00000023839	-3035	-3035	distal	101542489	101611949	+	-3035	ABCC2	1.56621	5.16297	2.71755	0	1.08595	0.663576	0	0.511546	0.353879	0	1.68936	2.80675	0.300437
10	101605554	101606020	ENSG00000023839	0.907933	40140	distal	101542489	101611949	+	0.907933	ABCC2	7.83107	6.13103	8.15264	8.54574	12.4884	3.98146	14.114	9.71938	8.13923	11.0226	12.6702	9.82363	8.41222
10	101630154	101630359	ENSG00000107554	4974	15801	distal	101635334	101690753	-	4974	DNMBP	1.56621	3.87223	0.679387	1.22082	0.542974	0.663576	0.855396	2.55773	3.89267	4.23946	4.2234	1.40338	2.70393
10	101668379	101668565	ENSG00000107554	0.34372	0.331948	promoter	101657954	101673839	-	0.34372	DNMBP	3.13243	1.45209	1.35877	0	2.71487	0	0.427698	1.02309	0.707759	2.54367	1.26702	3.50844	0.90131
10	101736808	101737055	ENSG00000107554	0.244659	0.242813	promoter	101635334	101769676	-	0.244659	DNMBP	1.04414	1.45209	2.03816	2.84858	2.17189	0.331788	1.71079	2.04619	1.7694	13.1423	10.5585	3.50844	0.90131
10	101743161	101743657	ENSG00000107554	0.197369	0.19367	promoter	101635334	101769676	-	0.197369	DNMBP	1.56621	8.55117	6.79387	0.81388	1.08595	0.331788	0.427698	1.02309	0.707759	0.423946	2.1117	0	0.90131
10	101744042	101744453	ENSG00000107554	0.190812	0.187745	promoter	101635334	101769676	-	0.190812	DNMBP	3.13243	8.22848	5.4351	2.44164	2.17189	1.65894	3.42158	1.53464	3.18492	7.63102	5.91276	4.91182	1.50218
10	101753792	101754421	ENSG00000107554	0.118236	0.113546	promoter	101635334	101769676	-	0.118236	DNMBP	10.4414	34.366	40.0838	5.69716	5.97271	4.64503	11.5478	17.3926	24.0638	15.262	22.8064	3.50844	10.2148
10	101759081	101759456	ENSG00000107554	0.0788659	0.0760671	promoter	101635334	101769676	-	0.0788659	DNMBP	2.08828	8.06714	5.4351	1.62776	0.542974	1.99073	1.71079	1.02309	1.7694	6.78313	5.91276	7.01688	2.40349
10	101766009	101766415	ENSG00000107554	0.027296	0.0242664	promoter	101635334	101769676	-	0.027296	DNMBP	3.6545	8.87385	8.83203	6.91798	7.60163	1.32715	16.2525	4.09237	3.89267	17.3818	15.2043	25.9625	3.60524
10	101769009	101769428	ENSG00000107554	0.00496494	0.00183859	promoter	101635334	101769676	-	0.00496494	DNMBP	10.4414	9.68057	8.83203	10.9874	5.42974	8.2947	5.98777	11.254	11.678	5.5113	7.60213	6.31519	6.30917
10	101769619	101769788	ENSG00000107554	0.00042429	0	promoter	101635334	101769676	-	0.00042429	DNMBP	2.61036	3.3882	3.39694	2.0347	1.08595	0.995364	1.71079	2.04619	2.83104	0.847892	3.37872	0.701688	6.30917
10	101773831	101774493	ENSG00000107554	-4154	-4154	distal	101635334	101769676	-	-4154	DNMBP	6.78692	26.7829	25.8167	25.6372	24.4338	10.949	9.83706	2.55773	4.24655	16.9578	13.9372	40.6979	9.31353
10	101780287	101780509	ENSG00000238472	830	830	distal	101779351	101779456	+	830	snoU13	2.08828	2.90417	4.07632	2.84858	2.71487	1.99073	2.13849	0	1.7694	1.69578	1.26702	3.50844	2.70393
10	101781187	101781464	ENSG00000238472	1730	1730	distal	101779351	101779456	+	1730	snoU13	2.61036	2.90417	2.71755	4.88328	3.80082	2.32252	2.99389	3.58082	2.12328	3.39157	2.1117	1.40338	12.3179
10	101804248	101804520	ENSG00000120054	0.942093	4003	distal	101801950	101841634	-	0.942093	CPN1	1.04414	3.54954	2.71755	1.62776	0.542974	2.6543	1.71079	4.09237	3.53879	1.69578	2.95638	1.40338	0.600873
10	101805757	101806214	ENSG00000120054	0.904067	2309	distal	101801950	101841634	-	0.904067	CPN1	5.74278	2.58148	3.39694	12.2082	12.4884	3.98146	5.13238	5.11546	2.83104	8.90286	8.86915	7.71857	5.40786
10	1018881	1019105	ENSG00000205740	0.896182	0.883089	promoter	1017097	1034281	-	0.896182	AL359878.1	0.522071	0.484028	0.679387	2.0347	0.542974	0.663576	0.427698	3.06928	0	1.69578	0.844681	0.701688	4.50655
10	101908411	101908814	ENSG00000107566	1036	-4658	distal	101909851	101948091	-	1036	ERLIN1	2.08828	1.29074	6.11448	1.62776	7.05866	1.99073	4.70468	7.16165	7.78535	10.1747	12.2479	6.31519	0.90131
10	101915837	101916001	ENSG00000107566	0.960859	-12084	distal	101914617	101945786	-	0.960859	ERLIN1	0.522071	0.645371	0.679387	1.22082	0.542974	0	0.855396	2.55773	1.41552	0.847892	3.37872	4.21013	5.70829
10	101927301	101927789	ENSG00000107566	0.593057	0.577369	promoter	101914617	101945786	-	0.593057	ERLIN1	4.69864	6.13103	6.11448	5.29022	2.17189	0.663576	3.42158	8.69629	7.07759	10.5986	9.29149	4.91182	3.90567
10	101932745	101932934	ENSG00000107566	0.418396	0.412301	promoter	101914617	101945786	-	0.418396	ERLIN1	0	0.484028	0.679387	0.40694	0.542974	0.995364	0.427698	1.02309	0.353879	5.5113	5.49042	0	0.600873
10	101945139	101946360	ENSG00000107566	0.0207578	0	promoter	101914617	101945786	-	0.0207578	ERLIN1	38.1112	45.8214	32.6106	48.4259	51.5825	38.1556	43.6252	46.5507	36.8035	34.7636	30.4085	34.3827	37.855
10	101988629	101989197	ENSG00000213341	0.018078	0.00430774	promoter	101948055	101989376	-	0.018078	CHUK	12.0076	9.68057	10.8702	8.95268	9.23055	6.63576	15.3971	11.7656	7.43147	9.32681	10.1362	13.3321	8.11179
10	101989272	101989539	ENSG00000213341	0.00251688	0	promoter	101948055	101989376	-	0.00251688	CHUK	8.35314	2.09746	2.71755	4.0694	4.88676	1.32715	4.70468	5.11546	2.47716	3.39157	6.3351	2.80675	7.51091
10	102026965	102027705	ENSG00000095485	0.0263899	0	promoter	102010031	102027424	-	0.0263899	CWF19L1	14.0959	13.3915	17.6641	11.8013	13.0314	9.95364	19.6741	9.71938	10.2625	17.3818	13.5149	18.2439	14.1205
10	102045800	102046969	ENSG00000196072	0.109775	0	promoter	102040691	102046430	-	0.109775	BLOC1S2	44.376	43.5626	40.7632	36.2177	34.7503	31.5199	53.89	76.732	64.7599	41.5467	42.234	27.3658	39.9581
10	102086610	102087415	ENSG00000107593	0.111365	0.0549056	promoter	102059392	102090021	-	0.111365	PKD2L1	37.5891	61.7943	54.351	32.5552	47.2387	17.253	11.1201	14.3233	15.5707	59.7764	60.817	31.576	36.3528
10	102098314	102098609	ENSG00000231188	0.723469	0.69613	promoter	102095320	102106147	-	0.723469	RP11-34D15.2	9.91935	5.00163	4.07632	7.73186	4.34379	3.98146	6.84317	5.62701	4.95431	4.23946	4.64574	5.6135	3.00437
10	102099092	102099284	ENSG00000231188	0.651612	0.633786	promoter	102095320	102106147	-	0.651612	RP11-34D15.2	6.78692	2.2588	4.07632	4.88328	5.97271	1.65894	0.427698	2.04619	1.06164	2.11973	3.80106	9.12194	3.3048
10	102106379	102107181	ENSG00000099194	-0.0283456	0	promoter	102106881	102124591	+	-0.0283456	SCD	20.3608	40.8197	29.2136	28.4858	20.633	22.2298	6.84317	15.8579	16.6323	10.1747	9.29149	19.6473	8.41222
10	102124709	102124889	ENSG00000099194	117	1332	distal	102106881	102124591	+	117	SCD	8.35314	0.968057	2.71755	2.0347	3.80082	0.331788	1.28309	2.04619	1.06164	0.423946	1.26702	2.80675	0.600873
10	102130552	102131231	ENSG00000235823	-2140	-2140	promoter	102133372	102143125	+	-2140	LINC00263	4.17657	28.0736	28.5343	5.69716	12.4884	0.995364	3.42158	0	1.06164	7.20708	11.4032	16.8405	7.21048
10	102132892	102133570	ENSG00000235823	-0.0492156	0	promoter	102133372	102143125	+	-0.0492156	LINC00263	25.5815	41.9491	24.4579	29.2997	23.3479	26.543	39.7759	30.1812	27.2487	22.8931	21.117	24.5591	33.048
10	102193447	102193919	ENSG00000273030	20268	20268	distal	102172691	102173178	+	20268	RP11-285F16.1	13.5738	9.35788	15.6259	10.5804	14.1173	6.63576	17.5356	5.62701	9.55475	12.2944	10.9808	11.9287	14.7214
10	102241215	102242708	ENSG00000075290	0.889581	3694	distal	102222798	102243501	+	0.889581	WNT8B	40.7215	38.5609	43.4808	36.2177	39.0941	27.8702	40.6313	29.1581	27.6026	34.3396	29.1415	27.3658	38.4559
10	102256229	102256821	ENSG00000075826	0.891974	0.59263	promoter	102256015	102257996	-	0.891974	SEC31B	2.61036	13.3915	19.0228	0	3.25784	0.663576	0.855396	2.55773	0.353879	1.69578	2.1117	2.10506	6.91004
10	102270716	102270931	ENSG00000255339	0.843414	-2165	promoter	102267203	102289638	-	0.843414	NDUFB8	1.04414	0.645371	1.35877	0.81388	6.51568	0.331788	2.13849	2.04619	0.707759	0	1.68936	0	0.600873
10	102278475	102278850	ENSG00000255339	0.858045	0.0222945	promoter	102276631	102289621	-	0.858045	NDUFB8	2.61036	3.06551	3.39694	5.69716	9.77353	1.99073	3.84928	2.55773	1.41552	8.90286	4.64574	5.6135	2.40349
10	102288297	102288966	ENSG00000166136	1.60167	0	promoter	102288800	102289636	-	1.60167	NDUFB8	10.9635	22.9107	23.7785	3.25552	3.25784	2.98609	5.98777	8.18474	2.83104	8.05497	5.06808	18.2439	4.50655
10	102289243	102290059	ENSG00000166136	0.470096	0	promoter	102288800	102289636	-	0.470096	NDUFB8	8.87521	15.0049	18.3435	20.7539	14.1173	11.6126	9.83706	11.7656	12.3858	11.8705	11.4032	9.12194	14.7214
10	102291674	102291876	ENSG00000166135	0.162488	-1916	promoter	102288829	102306338	+	0.162488	HIF1AN	20.8828	4.35626	3.39694	0.40694	4.88676	0.331788	10.6925	2.04619	0.707759	1.69578	2.1117	4.91182	14.421
10	102295299	102295942	ENSG00000166135	-0.0371034	0	promoter	102295672	102305725	+	-0.0371034	HIF1AN	35.5008	29.0417	32.6106	28.0789	33.6644	21.2344	36.782	20.9734	21.9405	30.5241	32.0979	24.5591	33.048
10	102321779	102322035	ENSG00000166135	2023	16524	distal	102295616	102319755	+	2023	HIF1AN	2.61036	4.35626	4.07632	1.22082	1.08595	3.31788	0.427698	4.60392	3.89267	6.35919	6.3351	4.91182	2.70393
10	102440445	102440635	ENSG00000075891	-54724	-54724	distal	102495360	102566356	+	-54724	PAX2	0.522071	0.161343	2.03816	0.81388	1.62892	0.331788	1.28309	2.04619	3.18492	1.69578	1.68936	0.701688	0.90131
10	102456311	102456570	ENSG00000075891	-38789	-38789	distal	102495360	102566356	+	-38789	PAX2	3.6545	1.77477	3.39694	0.81388	1.62892	1.32715	7.27087	0.511546	0.707759	2.54367	2.1117	0.701688	5.10742
10	102490953	102491223	ENSG00000075891	-4136	-4136	distal	102495360	102566356	+	-4136	PAX2	2.08828	2.42014	2.71755	2.0347	4.88676	4.31325	6.41547	2.55773	1.06164	1.27184	2.1117	3.50844	2.70393
10	10251205	10251477	ENSG00000200849	-23096	-23096	distal	10274574	10274675	+	-23096	Y_RNA	2.08828	0	1.35877	3.66246	2.71487	1.32715	0.427698	1.53464	2.83104	9.75075	8.44681	2.10506	7.81135
10	10255188	10255708	ENSG00000200849	-18865	-18865	distal	10274574	10274675	+	-18865	Y_RNA	9.39728	1.1294	1.35877	4.47634	2.17189	3.31788	1.28309	7.6732	11.678	15.686	13.0925	3.50844	12.9188
10	102588744	102588972	ENSG00000075891	0.988674	77958	distal	102505468	102589698	+	0.988674	PAX2	0.522071	0.161343	0	1.22082	1.62892	2.32252	0.855396	5.11546	4.60043	1.27184	1.68936	0.701688	0.90131
10	102607176	102607668	ENSG00000075891	17477	59262	distal	102505468	102589698	+	17477	PAX2	3.13243	0.806714	3.39694	4.0694	8.1446	5.30861	3.42158	7.6732	12.0319	4.23946	4.2234	2.10506	2.10306
10	10264861	10265099	ENSG00000200849	-9474	-9474	distal	10274574	10274675	+	-9474	Y_RNA	8.87521	0.322686	2.03816	0.40694	1.08595	0.331788	1.71079	1.02309	1.06164	0.847892	1.26702	1.40338	3.00437
10	102664681	102665076	ENSG00000222072	1854	1854	distal	102666931	102667037	-	1854	Y_RNA	0.522071	2.74283	5.4351	2.0347	3.80082	1.32715	14.9694	2.04619	1.06164	9.75075	8.02447	3.50844	11.717
10	102672278	102673402	ENSG00000272572	0.133252	0	promoter	102670860	102672496	-	0.133252	RP11-179B2.2	72.5679	61.4716	59.1067	47.612	53.2114	31.1881	60.7331	45.0161	45.6504	63.1679	54.9042	28.0675	57.9843
10	102728816	102729505	ENSG00000055950	1.02249	0	promoter	102729215	102746953	-	1.02249	MRPL43	0.522071	9.51922	7.47326	13.836	9.23055	1.32715	6.84317	6.6501	6.72371	7.20708	6.3351	4.21013	7.81135
10	102729837	102730092	ENSG00000055950	0.964934	0.163636	promoter	102729215	102746953	-	0.964934	MRPL43	2.61036	2.09746	2.71755	5.69716	9.77353	2.32252	5.13238	7.16165	7.43147	4.23946	2.53404	8.42025	5.40786
10	102746610	102747484	ENSG00000055950	0.713514	0	promoter	102746345	102747270	-	0.713514	MRPL43	18.7946	18.7158	15.6259	19.1262	17.9181	7.29934	12.8309	13.8118	8.84699	9.75075	13.9372	13.3321	14.7214
10	102757224	102758273	ENSG00000107816	-0.164796	0	promoter	102758105	102763451	+	-0.164796	LZTS2	35.5008	34.85	31.9312	35.4038	20.09	18.2483	32.9328	21.9965	29.7259	21.1973	19.4277	24.5591	23.434
10	102758938	102759142	ENSG00000107816	0.11599	-90	promoter	102758444	102762703	+	0.11599	LZTS2	6.78692	9.84191	11.5496	6.91798	5.42974	5.6404	8.12626	3.06928	6.01595	7.20708	6.3351	5.6135	6.30917
10	102772576	102773255	ENSG00000186862	0.875416	0.777022	promoter	102771715	102778626	-	0.875416	PDZD7	24.5373	27.9123	38.0457	17.9054	27.6917	14.5987	40.6313	33.2505	31.1414	31.7959	27.0298	17.5422	18.0262
10	102778781	102779151	ENSG00000186862	0.8774	-154	promoter	102777089	102790890	-	0.8774	PDZD7	3.13243	7.09908	5.4351	6.51104	6.51568	1.65894	9.83706	6.6501	5.66207	8.47892	12.6702	10.5253	3.3048
10	102790790	102791441	ENSG00000186862	0.0101427	0	promoter	102782885	102790871	-	0.0101427	PDZD7	34.4567	41.6264	32.6106	36.2177	21.7189	22.8934	25.2342	37.3429	25.8332	18.2297	18.1606	21.0506	24.9362
10	102791533	102792853	ENSG00000107819	-0.150203	0	promoter	102792237	102796924	+	-0.150203	SFXN3	41.7657	65.8279	74.0532	31.7413	29.8636	24.2205	41.9144	51.6662	45.6504	27.1325	16.8936	26.6641	32.4471
10	102800976	102801261	ENSG00000107819	0.993613	0.993309	promoter	102797709	102800997	+	0.993613	SFXN3	9.39728	10.0033	5.4351	3.25552	9.77353	7.29934	8.12626	9.71938	6.36983	5.5113	5.49042	7.71857	9.91441
10	102802360	102803096	ENSG00000107819	1361	1362	distal	102790991	102800998	+	1361	SFXN3	40.1995	40.3357	33.9694	22.3817	29.8636	22.8934	30.3666	29.1581	21.2328	21.6212	16.0489	31.576	31.8463
10	102809918	102810461	ENSG00000107819	8919	9324	distal	102790991	102800998	+	8919	SFXN3	7.309	8.87385	10.1908	6.51104	6.51568	2.98609	5.13238	4.60392	3.18492	6.35919	6.3351	9.12194	8.11179
10	102819846	102820101	ENSG00000273162	0.938525	0.67623	promoter	102819786	102820762	-	0.938525	RP11-108L7.15	5.74278	4.19491	8.15264	4.0694	7.60163	3.64967	9.83706	6.13856	3.53879	5.93524	10.1362	6.31519	4.50655
10	102820302	102821228	ENSG00000273162	0.471311	0	promoter	102819786	102820762	-	0.471311	RP11-108L7.15	19.3166	25.1695	31.2518	25.2303	15.7462	18.9119	20.9572	27.112	23.0022	22.4691	27.0298	26.6641	28.5415
10	102826225	102826628	ENSG00000107821	0.10994	0.108434	promoter	102826152	102826816	+	0.10994	KAZALD1	12.0076	10.1646	7.47326	4.88328	3.80082	3.31788	11.9755	10.2309	8.13923	2.96762	5.49042	2.80675	8.11179
10	102827312	102827828	ENSG00000107821	0.68559	495	promoter	102826056	102827888	+	0.68559	KAZALD1	6.78692	14.0368	16.3053	8.95268	2.71487	5.30861	9.40936	7.6732	9.90862	7.20708	7.60213	7.01688	7.51091
10	102831008	102831228	ENSG00000107821	3119	4191	distal	102826056	102827888	+	3119	KAZALD1	3.13243	4.67894	4.75571	2.84858	3.25784	0.663576	0.427698	5.62701	5.30819	1.69578	4.2234	4.91182	1.80262
10	102855293	102855642	ENSG00000236311	0.871919	-26893	distal	102850065	102890883	-	0.871919	TLX1NB	5.22071	6.45371	6.11448	8.1388	8.1446	4.31325	5.98777	4.09237	4.24655	5.93524	7.60213	10.5253	5.10742
10	102881190	102881355	ENSG00000236311	0.237469	-1180	promoter	102850065	102890883	-	0.237469	TLX1NB	3.13243	2.90417	1.35877	6.91798	3.25784	1.32715	1.71079	6.13856	2.47716	4.23946	4.2234	2.10506	4.50655
10	102901931	102902414	ENSG00000226740	-2462	-2462	promoter	102896232	102899468	-	-2462	RP11-31L23.3	11.4856	11.6167	8.15264	12.6151	11.9454	6.63576	13.2586	6.6501	5.66207	7.63102	11.4032	12.6304	7.51091
10	102918455	102918777	ENSG00000237579	-17302	-17302	distal	102936080	102953904	+	-17302	RP11-324L3.1	15.6621	9.0352	9.51142	3.25552	4.34379	2.32252	4.27698	3.58082	3.89267	2.96762	2.53404	4.21013	6.30917
10	102921492	102921800	ENSG00000237579	-14279	-14279	distal	102936080	102953904	+	-14279	RP11-324L3.1	5.74278	3.54954	3.39694	2.84858	8.1446	3.64967	11.9755	6.6501	3.18492	6.35919	7.60213	5.6135	6.00873
10	102973475	102973708	ENSG00000138136	13024	-15642	distal	102986733	102989551	-	13024	LBX1	6.78692	3.87223	0.679387	4.47634	5.97271	2.98609	6.41547	4.60392	4.95431	4.6634	5.06808	4.91182	5.40786
10	102974422	102974847	ENSG00000138136	11885	-14503	distal	102986733	102989551	-	11885	LBX1	14.0959	5.96968	8.83203	8.95268	9.77353	4.97682	8.98166	4.60392	3.18492	11.0226	7.60213	4.21013	8.11179
10	10298971	10299164	ENSG00000272436	1.54209	0.888889	promoter	10299132	10299429	-	1.54209	CUX2P1	2.61036	1.29074	1.35877	1.62776	0.542974	1.32715	1.71079	4.09237	3.89267	4.6634	2.95638	2.80675	3.00437
10	103032000	103032376	ENSG00000227128	2094	-4234	distal	102997695	103029905	+	2094	LBX1-AS1	9.39728	3.3882	6.11448	5.29022	10.8595	2.98609	12.8309	7.6732	2.47716	2.54367	4.64574	2.10506	4.50655
10	103057621	103057994	ENSG00000222238	-9291	-9291	distal	103067286	103067475	+	-9291	RNU2-43P	6.78692	3.71088	2.71755	6.91798	11.4024	4.31325	5.13238	3.06928	3.53879	5.5113	5.91276	5.6135	3.90567
10	103090659	103090859	ENSG00000230967	-7507	-7507	distal	103082242	103083151	-	-7507	RP11-107I14.5	1.56621	0	1.35877	4.0694	3.80082	0.331788	5.56007	0.511546	2.12328	5.5113	2.95638	1.40338	2.40349
10	103113436	103114033	ENSG00000166167	-0.00292421	0	promoter	103113939	103285951	+	-0.00292421	BTRC	81.9652	60.3422	83.5646	51.6814	62.9849	37.8238	76.558	59.8509	69.3604	68.6792	82.3564	53.3283	88.0279
10	103201930	103202258	ENSG00000166167	0.510869	-70220	distal	103114291	103285840	+	0.510869	BTRC	5.22071	5.48565	6.79387	2.84858	2.17189	1.99073	10.2648	6.13856	4.24655	2.96762	4.64574	6.31519	2.40349
10	103227115	103227496	ENSG00000166167	0.657678	-67644	distal	103114291	103285840	+	0.657678	BTRC	3.6545	3.87223	6.79387	4.88328	6.51568	3.31788	13.2586	8.18474	5.30819	10.5986	8.44681	5.6135	2.40349
10	103249181	103249406	ENSG00000166167	0.786306	-45734	distal	103114291	103285840	+	0.786306	BTRC	1.04414	3.54954	3.39694	1.22082	0	1.32715	1.28309	0	1.7694	2.11973	1.26702	4.91182	1.20175
10	103295631	103296079	ENSG00000166167	0.0309989	0.0309357	promoter	103295141	103310948	+	0.0309989	BTRC	1.56621	15.3276	11.5496	3.66246	2.71487	0	4.70468	1.02309	1.41552	9.32681	9.29149	5.6135	0.90131
10	103329541	103330393	ENSG00000166171	-0.0297421	0	promoter	103330317	103356408	+	-0.0297421	DPCD	13.5738	25.3308	23.7785	24.0095	20.633	13.6033	21.8126	19.4388	19.1095	8.47892	8.86915	18.9456	10.8157
10	103347507	103348323	ENSG00000166169	0.16575	0	promoter	103345081	103347989	-	0.16575	POLL	33.4125	34.366	32.6106	36.2177	29.3206	29.5291	32.5051	24.5542	20.525	28.8283	26.1851	16.1388	35.4515
10	103355730	103355924	ENSG00000166171	0.0862455	0.0861776	promoter	103354459	103369196	+	0.0862455	DPCD	1.04414	1.77477	4.07632	0.40694	0.542974	0.331788	2.56619	2.04619	1.06164	0.423946	0.42234	1.40338	1.20175
10	103362587	103362769	ENSG00000166171	0.234364	1332	distal	103360496	103369418	+	0.234364	DPCD	3.6545	2.09746	3.39694	3.66246	4.34379	1.65894	7.27087	6.13856	2.12328	2.11973	7.17978	9.12194	2.40349
10	103371409	103371576	ENSG00000107829	1.00334	0.891043	promoter	103371414	103372910	-	1.00334	FBXW4	1.56621	1.93611	1.35877	3.25552	2.17189	0.663576	2.13849	2.04619	0	1.69578	0.42234	1.40338	0.600873
10	103377201	103378007	ENSG00000107829	0.919875	-4290	distal	103370423	103455016	-	0.919875	FBXW4	10.4414	15.6503	16.3053	8.95268	7.60163	3.31788	2.56619	11.7656	6.72371	12.7184	9.71383	20.3489	8.11179
10	1033899	1034932	ENSG00000205740	0.02223	0	promoter	1017097	1034281	-	0.02223	AL359878.1	32.8905	34.366	22.4198	28.0789	23.8908	22.2298	33.3604	31.7159	31.1414	22.0452	25.7628	16.8405	39.3572
10	103443180	103443345	ENSG00000107829	0.168283	-6708	distal	103384504	103455052	-	0.168283	FBXW4	0	2.09746	2.71755	0	0	0.331788	0	0.511546	0.353879	0	0	0	0.600873
10	103453485	103454095	ENSG00000107829	0.0222118	0.0108756	promoter	103384504	103455052	-	0.0222118	FBXW4	14.618	21.6199	21.7404	21.5678	15.7462	10.2854	11.9755	17.3926	15.5707	11.4465	13.9372	12.6304	8.11179
10	103454928	103455183	ENSG00000107829	0.00175767	0	promoter	103384504	103455052	-	0.00175767	FBXW4	5.74278	3.3882	5.4351	5.29022	3.25784	4.97682	5.13238	3.58082	2.83104	2.54367	2.53404	1.40338	5.10742
10	103538539	103538768	ENSG00000107833	2313	-2684	distal	103541082	103543170	-	2313	NPM3	5.74278	9.19654	6.79387	8.54574	7.05866	5.30861	4.70468	7.16165	7.78535	8.47892	4.2234	4.91182	4.80698
10	103539719	103539951	ENSG00000107833	1130	1532	distal	103541082	103543170	-	1130	NPM3	7.309	8.38982	12.229	10.1735	7.05866	5.97219	4.70468	5.62701	5.30819	9.75075	8.44681	4.21013	8.71266
10	103542579	103543313	ENSG00000107833	0.30963	0	promoter	103541346	103543132	-	0.30963	NPM3	16.1842	27.1056	18.3435	17.0915	10.8595	8.62649	21.8126	16.881	12.3858	17.3818	13.0925	13.3321	13.2192
10	103577949	103578790	ENSG00000198408	0.0579249	0	promoter	103565800	103578696	-	0.0579249	MGEA5	78.3107	70.5068	79.4883	61.8549	57.0122	41.4735	62.0162	74.1742	82.8078	69.5271	73.4872	56.135	77.8131
10	103589421	103589611	ENSG00000120049	0.872983	-116	promoter	103587398	103603325	-	0.872983	KCNIP2	4.69864	6.13103	7.47326	6.1041	5.42974	1.65894	4.27698	6.6501	4.60043	6.35919	2.95638	1.40338	7.21048
10	103589783	103590918	ENSG00000120049	0.850254	0	promoter	103587398	103603325	-	0.850254	KCNIP2	41.7657	53.7271	50.954	46.7981	46.6957	27.2066	36.782	46.5507	45.2966	46.634	48.5691	39.9962	31.5458
10	103600333	103600866	ENSG00000120049	0.187857	-703	promoter	103587398	103603325	-	0.187857	KCNIP2	8.87521	19.0384	16.3053	8.54574	10.3165	8.2947	14.114	12.2771	9.20087	5.5113	10.1362	5.6135	12.3179
10	103600927	103601137	ENSG00000120049	0.150562	-1297	promoter	103587398	103603325	-	0.150562	KCNIP2	3.13243	1.45209	1.35877	1.22082	1.08595	2.6543	2.99389	3.06928	3.89267	0.423946	2.1117	2.10506	2.40349
10	103603437	103603835	ENSG00000120049	0.00536694	0	promoter	103586943	103603526	-	0.00536694	KCNIP2	4.17657	5.80834	8.83203	8.95268	7.60163	5.6404	2.56619	7.16165	11.3241	11.0226	4.64574	2.80675	1.20175
10	103618398	103619124	ENSG00000120029	0.93807	-14720	distal	103605356	103815950	-	0.93807	C10orf76	17.2283	7.26043	8.15264	13.0221	13.0314	12.9397	23.5234	17.9041	18.0479	19.9255	19.85	7.71857	17.1249
10	103649474	103649644	ENSG00000120029	0.790507	0	promoter	103605356	103815950	-	0.790507	C10orf76	5.22071	2.58148	2.71755	1.62776	3.25784	0.995364	4.70468	2.04619	1.7694	3.81551	2.95638	5.6135	1.80262
10	103655644	103655883	ENSG00000120029	0.761209	-6150	distal	103605356	103815950	-	0.761209	C10orf76	0.522071	3.54954	2.71755	2.0347	3.80082	0.663576	1.28309	3.58082	2.12328	1.69578	2.53404	1.40338	1.20175
10	103663698	103663851	ENSG00000120029	0.722965	-14204	distal	103605356	103815950	-	0.722965	C10orf76	0.522071	0	0	0.40694	0	0	5.56007	1.53464	0.707759	2.54367	0.42234	2.10506	0
10	103695144	103695372	ENSG00000120029	0.573644	16989	distal	103605356	103815950	-	0.573644	C10orf76	0.522071	2.42014	4.75571	0.81388	0.542974	0.663576	1.71079	1.53464	0.353879	1.69578	0.42234	2.80675	0.300437
10	103699044	103699340	ENSG00000120029	0.555125	13021	distal	103605356	103815950	-	0.555125	C10orf76	10.9635	0.484028	0.679387	1.62776	2.71487	1.65894	2.13849	2.04619	0.353879	9.32681	9.71383	3.50844	0.300437
10	103724747	103725124	ENSG00000120029	0.433075	-12285	distal	103605356	103815950	-	0.433075	C10orf76	0.522071	7.74445	10.8702	2.0347	1.62892	0	0.427698	2.04619	1.06164	2.54367	3.80106	0.701688	0.300437
10	103728911	103729194	ENSG00000120029	0.413302	-16449	distal	103605356	103815950	-	0.413302	C10orf76	7.83107	11.6167	6.11448	1.62776	3.80082	0.331788	4.27698	0.511546	1.41552	3.81551	2.95638	5.6135	1.20175
10	103732577	103732866	ENSG00000120029	0.395894	-20115	distal	103605356	103815950	-	0.395894	C10orf76	0.522071	7.42177	8.15264	0.40694	0.542974	0.663576	0.855396	3.58082	1.41552	2.54367	2.53404	2.80675	0.300437
10	103733313	103733691	ENSG00000120029	0.3924	-20851	distal	103605356	103815950	-	0.3924	C10orf76	9.39728	9.19654	6.79387	4.0694	2.71487	1.99073	5.56007	5.62701	8.13923	5.5113	6.3351	9.12194	6.91004
10	103746099	103746628	ENSG00000120029	0.331686	3679	distal	103605356	103815950	-	0.331686	C10orf76	10.9635	8.87385	10.1908	6.1041	5.97271	2.98609	2.13849	6.6501	8.13923	12.7184	8.44681	14.7354	6.00873
10	103769533	103769889	ENSG00000120029	0.22041	-7711	distal	103605356	103815950	-	0.22041	C10orf76	1.56621	2.58148	6.11448	8.95268	8.68758	2.32252	11.5478	2.55773	2.12328	3.81551	7.17978	3.50844	3.90567
10	103815306	103816224	ENSG00000120029	0.0240793	0	promoter	103789205	103815950	-	0.0240793	C10orf76	18.7946	27.4283	25.8167	20.7539	20.633	10.949	24.8065	16.881	16.6323	25.0128	27.0298	21.7523	25.5371
10	103824707	103825274	ENSG00000166189	-0.166352	0	promoter	103825147	103827792	+	-0.166352	HPS6	19.3166	26.7829	19.0228	19.9401	14.1173	12.2762	18.8187	14.8348	18.4017	17.8057	13.5149	10.5253	24.9362
10	103832632	103832929	ENSG00000166189	4839	4839	distal	103825147	103827792	+	4839	HPS6	3.13243	3.06551	6.11448	6.1041	7.60163	1.65894	7.27087	5.11546	2.47716	2.54367	4.2234	6.31519	5.10742
10	103874577	103875048	ENSG00000198728	0.573233	0	promoter	103870387	103880205	-	0.573233	LDB1	24.0153	25.0081	19.0228	21.5678	14.6603	12.2762	14.9694	17.9041	14.5091	12.7184	11.8255	17.5422	21.331
10	103879270	103879440	ENSG00000198728	0.0952332	0.0778163	promoter	103870387	103880205	-	0.0952332	LDB1	7.83107	6.93774	8.83203	5.69716	8.68758	6.30397	6.41547	6.13856	6.36983	4.23946	6.75744	9.82363	3.00437
10	103880147	103880961	ENSG00000198728	0.00590752	0	promoter	103870387	103880205	-	0.00590752	LDB1	15.1401	18.8771	19.7022	17.4984	13.0314	12.6079	13.2586	19.9503	15.9246	8.05497	9.29149	9.12194	11.1162
10	103892259	103893082	ENSG00000148840	-0.0313155	0	promoter	103892797	103909977	+	-0.0313155	PPRC1	73.612	69.8614	75.412	60.2271	60.813	40.4781	70.1425	68.5472	62.6367	73.3426	65.8851	57.5384	77.8131
10	103893528	103893957	ENSG00000148840	0.0425495	0.0424913	promoter	103892797	103909977	+	0.0425495	PPRC1	15.1401	16.941	10.8702	14.2429	11.4024	8.62649	19.6741	18.4157	22.6483	16.5339	13.0925	5.6135	10.5153
10	103911658	103912469	ENSG00000166197	-0.0448712	0	promoter	103912172	103923627	+	-0.0448712	NOLC1	78.8327	59.3741	56.3891	48.8328	50.4965	34.8377	59.8777	55.247	47.4198	48.3298	49.8362	47.7148	65.7956
10	103929125	103929746	ENSG00000166197	5497	5501	distal	103912172	103923627	+	5497	NOLC1	16.1842	18.8771	17.6641	27.265	22.2619	7.63113	14.5417	18.9272	14.1552	11.0226	14.7819	19.6473	14.1205
10	103945753	103946371	ENSG00000166197	22125	22129	distal	103912172	103923627	+	22125	NOLC1	1.04414	21.1359	23.7785	11.3943	10.8595	8.2947	3.42158	16.3695	15.2168	1.27184	2.95638	21.7523	0.300437
10	103949036	103949632	ENSG00000166197	25408	25412	distal	103912172	103923627	+	25408	NOLC1	12.0076	19.5225	24.4579	11.3943	9.77353	7.29934	17.1079	10.7425	16.9862	17.3818	19.4277	16.8405	14.7214
10	103953078	103953232	ENSG00000166197	29450	29454	distal	103912172	103923627	+	29450	NOLC1	0	0	1.35877	0.40694	1.08595	0.331788	0	0.511546	0	5.93524	7.60213	0	2.10306
10	103962235	103962598	ENSG00000119915	-23486	-23486	distal	103986085	103989346	+	-23486	ELOVL3	2.08828	2.74283	6.11448	3.66246	3.80082	1.99073	1.28309	4.09237	1.7694	1.69578	0.844681	4.21013	1.50218
10	103970016	103970181	ENSG00000119915	-15903	-15903	distal	103986085	103989346	+	-15903	ELOVL3	1.04414	3.71088	5.4351	0.81388	1.62892	0.331788	0	0.511546	1.41552	0.423946	0.844681	0	0
10	103971326	103971856	ENSG00000119915	-14228	-14228	distal	103986085	103989346	+	-14228	ELOVL3	4.17657	18.2317	29.2136	4.47634	5.42974	3.64967	4.70468	7.6732	4.60043	16.5339	14.3596	9.82363	12.0175
10	103985782	103986223	ENSG00000119915	-0.0929163	0	promoter	103986085	103989346	+	-0.0929163	ELOVL3	26.6256	26.6216	19.0228	22.7886	19.5471	12.9397	21.3849	17.3926	19.1095	15.686	14.3596	17.5422	20.1292
10	103989528	103990447	ENSG00000107859	1.03676	0.73379	promoter	103989943	104001231	-	1.03676	PITX3	19.3166	28.0736	23.7785	14.6498	10.3165	9.29007	25.2342	13.8118	11.678	13.9902	16.0489	20.3489	13.2192
10	103990641	103991015	ENSG00000107859	0.938164	0.43437	promoter	103989943	104001231	-	0.938164	PITX3	2.61036	10.1646	7.47326	3.66246	3.80082	2.98609	2.99389	1.02309	3.18492	4.23946	2.53404	5.6135	2.10306
10	103991440	103991807	ENSG00000107859	0.867381	0.0168687	promoter	103989943	104001231	-	0.867381	PITX3	2.61036	11.4553	8.15264	4.0694	5.42974	4.97682	3.42158	3.58082	3.89267	4.23946	5.91276	2.80675	2.40349
10	104001316	104001584	ENSG00000107859	-84	-84	promoter	103989943	104001231	-	-84	PITX3	23.4932	11.1327	10.8702	21.1609	13.0314	3.31788	11.1201	11.7656	18.7556	7.20708	4.64574	13.3321	4.80698
10	104004805	104005518	ENSG00000107862	-0.00352341	0	promoter	104005289	104142656	+	-0.00352341	GBF1	110.157	91.9654	85.6028	68.3659	78.7312	50.1	98.3706	85.4282	88.8237	86.061	89.9585	63.8536	126.183
10	104044923	104045216	ENSG00000107862	0.288526	23859	distal	104005289	104142656	+	0.288526	GBF1	1.56621	4.19491	0.679387	0.81388	1.08595	0	0.427698	1.53464	0.707759	2.96762	1.68936	1.40338	0
10	104059716	104060486	ENSG00000107862	0.396216	38652	distal	104005289	104142656	+	0.396216	GBF1	4.17657	19.0384	22.4198	3.25552	1.08595	3.31788	5.56007	7.16165	5.66207	10.1747	12.6702	7.01688	1.80262
10	104100858	104101180	ENSG00000107862	0.69572	-17675	distal	104005289	104142656	+	0.69572	GBF1	1.56621	4.84028	4.75571	1.62776	1.62892	0	1.28309	1.02309	0	2.54367	2.95638	0.701688	0.300437
10	104111959	104112152	ENSG00000107862	0.776533	-6703	distal	104005289	104142656	+	0.776533	GBF1	1.56621	1.77477	3.39694	2.84858	4.34379	2.32252	4.27698	6.13856	1.06164	1.69578	6.3351	3.50844	1.80262
10	104144662	104144827	ENSG00000107862	2005	-9039	distal	104005289	104142656	+	2005	GBF1	0.522071	1.77477	2.03816	1.62776	0.542974	0.663576	0.855396	1.53464	0.353879	0	2.1117	2.10506	0.300437
10	104153760	104154717	ENSG00000077150	-0.0749338	0	promoter	104154354	104162281	+	-0.0749338	NFKB2	103.37	112.456	118.893	78.1325	73.8444	44.1278	60.7331	72.128	77.4996	60.2003	61.2393	49.1182	82.9205
10	104155243	104155903	ENSG00000077150	-0.0322675	0	promoter	104155463	104162281	+	-0.0322675	NFKB2	33.9346	43.2399	30.5724	28.8927	24.9768	17.253	35.4989	39.3891	25.8332	41.5467	35.4766	27.3658	30.945
10	104159164	104159545	ENSG00000077150	0.671026	-789	promoter	104157830	104159818	+	0.671026	NFKB2	12.5297	24.5241	12.9084	9.76656	5.97271	6.63576	14.114	6.6501	10.2625	7.63102	13.5149	4.91182	10.2148
10	104163550	104163802	ENSG00000059915	0.932198	599	distal	104162376	104179691	-	0.932198	PSD	5.22071	10.9713	12.229	7.73186	7.60163	6.30397	11.5478	8.18474	7.78535	10.5986	12.2479	7.71857	6.91004
10	104180323	104181169	ENSG00000059915	0.201491	0	promoter	104176467	104181296	-	0.201491	PSD	46.9864	52.1137	50.954	38.2524	39.0941	26.543	38.9205	39.9006	31.4953	36.8833	40.1223	35.7861	34.8506
10	104181910	104182263	ENSG00000107872	0.974016	-613	promoter	104180598	104181945	+	0.974016	FBXL15	7.83107	11.4553	15.6259	0.81388	2.71487	1.99073	4.27698	2.04619	1.06164	3.39157	5.49042	3.50844	2.10306
10	104182396	104182700	ENSG00000107872	0.849576	-1099	promoter	104179589	104182893	+	0.849576	FBXL15	4.69864	10.0033	10.1908	6.1041	3.80082	2.6543	4.70468	6.6501	4.24655	5.5113	7.17978	7.71857	2.40349
10	104185985	104186419	ENSG00000107874	0.743131	-1923	promoter	104183788	104192341	-	0.743131	CUEDC2	2.08828	0.322686	0.679387	1.22082	0.542974	0.995364	27.3727	2.55773	0.353879	2.96762	4.2234	2.80675	1.50218
10	104191952	104192740	ENSG00000107874	0.0454811	0	promoter	104183788	104192341	-	0.0454811	CUEDC2	21.4049	35.0114	25.1373	17.9054	21.176	17.5848	26.0896	21.4849	23.7099	19.5015	28.7191	18.9456	30.0437
10	104209257	104209741	ENSG00000120055	1.19754	0	promoter	104209594	104211300	-	1.19754	C10orf95	19.3166	11.6167	15.6259	14.2429	7.60163	8.2947	14.9694	8.69629	9.55475	11.4465	16.0489	11.227	14.7214
10	104209890	104210293	ENSG00000120055	0.826495	0	promoter	104209594	104211300	-	0.826495	C10orf95	4.69864	9.19654	9.51142	4.47634	1.08595	4.64503	5.13238	3.58082	3.53879	5.5113	5.49042	5.6135	2.10306
10	104212791	104213002	ENSG00000269609	0.739288	-594	promoter	104211359	104213296	+	0.739288	RP11-18I14.10	3.6545	5.80834	6.11448	1.62776	2.71487	3.31788	4.70468	6.6501	4.24655	7.20708	6.75744	2.10506	1.20175
10	104220836	104221322	ENSG00000138111	-0.0308203	0	promoter	104221170	104232007	+	-0.0308203	TMEM180	13.5738	13.2301	15.6259	11.8013	7.60163	9.62185	5.56007	7.16165	7.07759	11.4465	7.60213	11.227	8.71266
10	104238646	104239157	ENSG00000138107	1.01485	-3638	distal	104238994	104262435	-	1.01485	ACTR1A	13.0518	8.71251	11.5496	9.35962	11.4024	5.6404	14.5417	4.60392	6.01595	7.63102	11.4032	8.42025	9.31353
10	104261669	104262837	ENSG00000138107	0.03778	0	promoter	104242771	104262411	-	0.03778	ACTR1A	118.51	109.552	110.061	88.7129	74.3874	55.0768	119.328	105.89	98.0246	108.106	89.9585	80.6941	109.96
10	104263441	104263755	ENSG00000107882	-0.0023389	0	promoter	104263744	104393292	+	-0.0023389	SUFU	39.1553	32.2686	35.3281	32.5552	30.4065	16.5894	49.613	23.5311	25.4793	27.9804	41.8117	24.5591	43.2629
10	104271579	104271819	ENSG00000107882	0.0675772	0.0675685	promoter	104263836	104378416	+	0.0675772	SUFU	3.13243	3.22686	2.71755	0.81388	2.71487	0.331788	0.427698	0.511546	2.83104	2.11973	4.2234	4.21013	1.50218
10	104343547	104343969	ENSG00000107882	0.69568	-6596	distal	104263836	104378416	+	0.69568	SUFU	7.83107	7.26043	12.229	6.51104	9.77353	3.64967	12.4032	4.09237	4.95431	6.35919	10.5585	8.42025	6.91004
10	104401730	104402209	ENSG00000272933	339	339	promoter	104402549	104403897	-	339	RP11-47A8.5	33.4125	28.8804	29.893	25.6372	31.4925	17.253	32.5051	33.7621	28.3104	24.5889	26.6074	28.0675	42.0611
10	104404746	104404953	ENSG00000171206	0.00845281	0.00836993	promoter	104404644	104416711	+	0.00845281	TRIM8	13.5738	15.9729	8.83203	13.836	7.05866	8.95828	13.6863	3.58082	5.30819	5.08735	5.06808	8.42025	12.6183
10	104405572	104406416	ENSG00000171206	0.076904	0.0768211	promoter	104404644	104416711	+	0.076904	TRIM8	98.6714	130.042	109.381	59.0063	48.3247	44.1278	65.4378	85.4282	86.7005	82.6694	71.7978	45.6097	83.5214
10	104412129	104412690	ENSG00000171206	0.406839	-2347	promoter	104408976	104416726	+	0.406839	TRIM8	24.5373	7.9058	5.4351	19.5331	12.4884	7.29934	2.56619	21.9965	19.1095	28.4044	24.0734	9.82363	5.40786
10	104420707	104421315	ENSG00000171206	2542	3862	distal	104404253	104418164	+	2542	TRIM8	20.3608	20.3292	11.5496	13.429	13.0314	7.96291	8.55396	15.3464	7.43147	6.78313	5.06808	10.5253	19.2279
10	104433770	104434241	ENSG00000138175	0.993067	16925	distal	104433488	104474164	-	0.993067	ARL3	19.8387	0.968057	2.03816	4.47634	5.42974	6.96755	7.69857	21.4849	22.6483	0.423946	3.37872	16.1388	7.51091
10	104438544	104438943	ENSG00000138175	0.875701	21699	distal	104433488	104474164	-	0.875701	ARL3	4.69864	6.45371	6.79387	3.25552	2.17189	4.97682	9.40936	4.09237	2.83104	8.05497	4.2234	8.42025	5.40786
10	104471381	104471633	ENSG00000138175	0.0684187	0.0621988	promoter	104433488	104474164	-	0.0684187	ARL3	9.39728	18.7158	21.7404	15.4637	8.68758	6.63576	5.98777	1.53464	1.41552	1.69578	2.1117	14.0338	0.90131
10	104473556	104474776	ENSG00000138175	0.0149474	0	promoter	104433488	104474164	-	0.0149474	ARL3	71.0017	81.8008	66.5799	85.0505	69.5006	42.8007	58.5946	58.3163	58.0362	78.006	61.2393	51.2232	68.1991
10	104503253	104504269	ENSG00000166272	-0.00655874	0	promoter	104503727	104575997	+	-0.00655874	WBP1L	60.0382	45.0146	49.5953	35.4038	44.5238	29.1974	55.6007	47.0623	50.9586	51.7214	53.6372	42.1013	68.8
10	104512979	104513266	ENSG00000166272	0.12802	0.128006	promoter	104503727	104575997	+	0.12802	WBP1L	3.6545	1.29074	2.03816	1.62776	3.25784	3.64967	7.69857	0	1.06164	3.81551	3.37872	4.91182	0.600873
10	104531808	104532465	ENSG00000166272	0.388557	-3540	distal	104503727	104575997	+	0.388557	WBP1L	23.4932	22.104	23.0992	17.9054	19.0041	8.2947	6.41547	47.0623	51.6664	14.8381	22.384	37.1895	7.81135
10	104536738	104537242	ENSG00000166272	0.0182931	0.0182681	promoter	104536006	104576021	+	0.0182931	WBP1L	1.04414	0.645371	0.679387	1.22082	1.62892	23.557	41.4867	0.511546	0.707759	17.3818	12.2479	9.82363	2.10306
10	104541389	104541761	ENSG00000166272	0.134525	0.1345	promoter	104536006	104576021	+	0.134525	WBP1L	2.08828	0.806714	0	3.66246	1.62892	13.2715	0.855396	0.511546	0.353879	0.847892	1.26702	2.10506	0.600873
10	104555994	104556709	ENSG00000166272	0.499513	-6976	distal	104536006	104576021	+	0.499513	WBP1L	13.0518	26.1375	21.061	6.1041	4.34379	7.29934	33.3604	12.7887	13.4474	22.0452	19.4277	14.0338	11.4166
10	104594643	104595010	ENSG00000148795	0.641787	0.548363	promoter	104593232	104597171	-	0.641787	CYP17A1	4.17657	5.00163	3.39694	4.47634	8.68758	3.64967	6.41547	4.60392	4.95431	5.5113	6.75744	4.91182	3.60524
10	10460311	10460764	ENSG00000270111	736	736	distal	10461501	10504312	-	736	RP11-271F18.4	1.56621	0.322686	1.35877	2.0347	5.42974	1.99073	1.28309	10.2309	9.55475	11.8705	12.2479	2.10506	6.91004
10	104613825	104614503	ENSG00000166275	-0.0531318	0	promoter	104614166	104620584	+	-0.0531318	C10orf32	41.2436	27.4283	31.9312	26.4511	20.09	15.9258	29.9389	33.2505	26.541	24.1649	26.1851	29.4709	33.3485
10	104677273	104678332	ENSG00000148842	-0.00525645	0	promoter	104678114	104838108	+	-0.00525645	CNNM2	102.326	86.157	99.1905	67.959	69.5006	48.1093	72.281	67.0126	82.1	81.8215	66.7298	61.7485	85.0235
10	104683418	104683790	ENSG00000148842	0.0331512	0.033145	promoter	104678114	104838108	+	0.0331512	CNNM2	3.13243	4.5176	2.03816	3.66246	1.08595	1.32715	2.99389	1.53464	0.353879	3.81551	4.2234	4.21013	5.70829
10	104813662	104814422	ENSG00000148842	0.847207	-13770	distal	104678114	104838108	+	0.847207	CNNM2	15.1401	15.4889	18.3435	0.81388	2.17189	10.2854	44.0529	18.9272	18.7556	18.2297	15.2043	17.5422	20.7301
10	104829325	104829687	ENSG00000148842	0.131735	0.131619	promoter	104828193	104836786	+	0.131735	CNNM2	4.17657	5.647	5.4351	6.91798	6.51568	4.97682	10.6925	4.09237	3.89267	4.23946	6.3351	13.3321	4.80698
10	104870807	104871117	ENSG00000076685	0.723737	-4362	distal	104859683	104899949	-	0.723737	NT5C2	8.35314	10.3259	6.11448	6.51104	3.25784	4.97682	5.13238	4.60392	3.53879	8.05497	2.95638	4.21013	9.61397
10	104871412	104872193	ENSG00000076685	1.0011	-4967	distal	104871502	104953055	-	1.0011	NT5C2	17.7504	29.0417	19.0228	15.8707	13.5743	14.2669	25.6619	16.3695	13.4474	21.6212	15.6266	14.0338	9.0131
10	104892696	104892961	ENSG00000076685	0.74012	0.173521	promoter	104871502	104953055	-	0.74012	NT5C2	1.04414	3.71088	6.79387	3.25552	2.71487	0.663576	2.56619	2.55773	1.41552	2.11973	2.1117	2.10506	1.50218
10	104895027	104895231	ENSG00000076685	0.711537	0.117146	promoter	104871502	104953055	-	0.711537	NT5C2	1.56621	1.93611	4.07632	3.25552	2.71487	0.331788	6.41547	0.511546	1.41552	1.69578	3.37872	6.31519	1.50218
10	104937156	104937355	ENSG00000076685	0.325773	1304	distal	104929041	104941077	-	0.325773	NT5C2	2.08828	5.16297	3.39694	6.1041	7.05866	0.995364	0	3.58082	3.18492	5.08735	5.91276	2.10506	2.70393
10	104940887	104941405	ENSG00000076685	0.015786	0	promoter	104929041	104941077	-	0.015786	NT5C2	8.87521	23.556	28.5343	17.9054	29.3206	0.331788	8.98166	12.2771	13.0935	18.6536	19.4277	18.2439	12.3179
10	104951870	104952628	ENSG00000076685	0.0145304	0.00383307	promoter	104871502	104953055	-	0.0145304	NT5C2	12.0076	22.7493	16.3053	14.6498	9.23055	5.97219	13.6863	12.2771	15.9246	13.9902	11.4032	6.31519	8.71266
10	105000081	105000246	ENSG00000235376	-5397	-5397	distal	105005644	105007773	+	-5397	RP11-332O19.5	3.6545	2.2588	3.39694	2.84858	4.88676	0.331788	0.427698	1.02309	1.41552	3.39157	3.80106	2.80675	1.50218
10	105001566	105001804	ENSG00000235376	-3839	-3839	distal	105005644	105007773	+	-3839	RP11-332O19.5	2.61036	2.2588	2.03816	1.62776	1.62892	0.331788	1.71079	2.04619	1.06164	7.63102	7.60213	4.91182	0.90131
10	105004531	105004719	ENSG00000235376	-924	-924	promoter	105005644	105007773	+	-924	RP11-332O19.5	2.08828	2.2588	6.11448	4.47634	2.71487	1.32715	6.41547	1.53464	1.7694	5.5113	6.3351	6.31519	2.10306
10	105010697	105010890	ENSG00000235376	2923	2923	distal	105005644	105007773	+	2923	RP11-332O19.5	4.69864	0.484028	2.71755	2.0347	2.17189	0.331788	2.99389	5.62701	0.353879	1.27184	2.95638	3.50844	2.40349
10	105058712	105058877	ENSG00000156374	3675	13315	distal	105062553	105110836	-	3675	PCGF6	0.522071	1.93611	2.03816	0	0	0.663576	0	1.02309	0.353879	0.847892	2.53404	3.50844	0.300437
10	105110376	105111148	ENSG00000156374	0.00963423	0	promoter	105062884	105110838	-	0.00963423	PCGF6	8.87521	14.8435	12.229	6.91798	5.42974	7.29934	7.69857	7.6732	9.90862	9.75075	8.02447	4.91182	11.1162
10	105127427	105127812	ENSG00000148835	-0.0140772	0	promoter	105127724	105148822	+	-0.0140772	TAF5	10.4414	9.35788	18.3435	7.32492	5.42974	4.64503	8.98166	7.6732	10.2625	15.262	18.1606	9.12194	12.6183
10	105128164	105128793	ENSG00000148835	0.0208551	0.0208077	promoter	105127724	105148822	+	0.0208551	TAF5	26.1036	28.5577	25.8167	17.4984	16.8322	11.2808	18.391	27.6235	23.7099	17.8057	24.9181	23.1557	23.434
10	105155687	105156832	ENSG00000173915	0.0722762	0	promoter	105148807	105156223	-	0.0722762	USMG5	62.1265	63.7304	46.8777	38.2524	39.6371	32.1834	64.1547	42.4583	48.4815	50.8735	46.8798	30.8743	59.7869
10	105176680	105176969	ENSG00000148843	0.408408	-7771	distal	105156405	105206049	+	0.408408	PDCD11	3.6545	0.968057	1.35877	2.44164	1.08595	1.32715	1.28309	0.511546	1.41552	5.93524	5.49042	3.50844	2.40349
10	105210930	105211289	ENSG00000138172	0.352891	0.0200308	promoter	105210169	105211345	-	0.352891	CALHM2	2.61036	8.38982	5.4351	2.84858	3.80082	3.98146	2.99389	5.11546	3.89267	2.54367	2.53404	8.42025	0.600873
10	105211664	105212420	ENSG00000138172	0.231026	0	promoter	105210053	105212148	-	0.231026	CALHM2	8.35314	17.909	12.229	14.2429	14.1173	10.6172	3.84928	13.3002	10.9703	8.47892	6.75744	7.71857	8.11179
10	105218567	105218861	ENSG00000185933	0.0141792	0	promoter	105213144	105218645	-	0.0141792	CALHM1	1.56621	3.06551	4.75571	0.81388	3.25784	6.63576	3.84928	2.55773	2.12328	1.69578	2.1117	1.40338	4.20611
10	105230756	105231588	ENSG00000183128	972	972	distal	105232561	105238997	-	972	CALHM3	30.2801	75.6698	48.9159	45.1704	36.3792	38.8192	24.3788	68.5472	56.9746	31.7959	20.6947	32.9793	60.3877
10	105231752	105232218	ENSG00000183128	342	342	promoter	105232561	105238997	-	342	CALHM3	2.61036	21.6199	16.3053	10.9874	10.3165	7.29934	2.13849	8.18474	6.01595	4.6634	3.80106	4.91182	5.70829
10	105236203	105236493	ENSG00000183128	0.434121	0.388906	promoter	105232561	105238997	-	0.434121	CALHM3	3.13243	8.71251	5.4351	5.69716	4.34379	7.63113	11.1201	3.58082	2.83104	2.11973	1.68936	10.5253	0.90131
10	105238924	105239307	ENSG00000183128	0.0113424	0	promoter	105232561	105238997	-	0.0113424	CALHM3	9.91935	2.90417	2.71755	8.1388	6.51568	8.95828	5.13238	8.18474	7.07759	2.11973	1.68936	6.31519	8.41222
10	105245091	105245821	ENSG00000235470	0.848346	-6093	distal	105239360	105277150	-	0.848346	RP11-225H22.5	9.39728	8.55117	5.4351	13.0221	14.1173	7.63113	21.8126	8.69629	7.07759	15.262	9.29149	5.6135	8.71266
10	105250438	105251021	ENSG00000235470	0.706854	-2714	distal	105239360	105277150	-	0.706854	RP11-225H22.5	20.8828	1.61343	8.83203	1.22082	4.34379	13.9351	11.1201	5.11546	4.24655	4.23946	3.80106	9.82363	7.81135
10	105258614	105259061	ENSG00000235470	0.4905	0.049476	promoter	105239360	105277150	-	0.4905	RP11-225H22.5	9.91935	3.71088	6.79387	12.6151	8.68758	19.2437	4.70468	2.04619	0.353879	5.08735	5.49042	10.5253	6.30917
10	105263990	105264422	ENSG00000235470	0.34824	0.104014	promoter	105239360	105277150	-	0.34824	RP11-225H22.5	4.17657	4.03357	1.35877	11.8013	8.1446	1.32715	7.69857	7.6732	6.01595	4.6634	5.06808	6.31519	15.9231
10	105275203	105275691	ENSG00000235470	0.0515216	-43	promoter	105239360	105277150	-	0.0515216	RP11-225H22.5	10.4414	6.29237	10.1908	8.54574	7.60163	10.2854	17.9633	10.2309	9.20087	20.3494	17.7383	21.0506	4.80698
10	105302592	105302884	ENSG00000107954	0.495633	-5947	distal	105253736	105352309	+	0.495633	NEURL	3.6545	1.45209	1.35877	2.84858	1.62892	2.98609	1.71079	2.04619	2.47716	1.27184	1.68936	4.91182	1.80262
10	105302921	105303123	ENSG00000107954	0.49897	-5708	distal	105253736	105352309	+	0.49897	NEURL	1.04414	0.806714	2.03816	2.0347	0	1.32715	0	1.53464	0.353879	3.81551	0.42234	1.40338	1.20175
10	105314567	105314907	ENSG00000107954	0.617116	-81	promoter	105253736	105352309	+	0.617116	NEURL	1.56621	3.22686	2.03816	2.84858	4.34379	10.6172	2.56619	6.6501	4.24655	4.6634	5.06808	4.91182	2.70393
10	105343830	105344286	ENSG00000107954	0.771898	6170	distal	105315137	105352309	+	0.771898	NEURL	1.56621	0	2.71755	0.81388	1.62892	0.663576	1.28309	4.09237	7.07759	5.5113	8.44681	0.701688	0.300437
10	105419677	105420451	ENSG00000107957	0.0297847	0.016853	promoter	105361532	105421462	-	0.0297847	SH3PXD2A	12.0076	17.909	14.2671	2.0347	3.25784	1.65894	9.83706	15.3464	15.2168	23.741	21.5394	11.227	8.71266
10	105421285	105421707	ENSG00000107957	0.00295345	0	promoter	105361532	105421462	-	0.00295345	SH3PXD2A	18.2725	0.161343	0	1.22082	1.62892	0	5.56007	9.71938	12.7397	18.2297	15.2043	7.71857	10.8157
10	105428672	105428873	ENSG00000107957	0.663401	-4042	distal	105361503	105561055	-	0.663401	SH3PXD2A	1.04414	0.484028	0.679387	0	1.08595	0.331788	0.427698	8.18474	4.24655	0.847892	1.68936	0.701688	0.90131
10	105437671	105438353	ENSG00000107957	0.618305	0	promoter	105361503	105561055	-	0.618305	SH3PXD2A	40.7215	25.9762	18.3435	34.9969	39.0941	24.5523	39.7759	29.1581	30.4336	20.7733	21.9617	27.3658	31.5458
10	105439388	105439553	ENSG00000107957	0.609701	-1465	promoter	105361503	105561055	-	0.609701	SH3PXD2A	1.04414	2.74283	1.35877	6.91798	10.8595	4.64503	3.42158	4.60392	3.89267	2.11973	3.37872	4.21013	2.10306
10	105445796	105446289	ENSG00000107957	0.577589	0.0634526	promoter	105361503	105561055	-	0.577589	SH3PXD2A	5.74278	4.03357	7.47326	5.29022	11.9454	3.64967	6.41547	4.09237	3.89267	4.23946	6.3351	9.12194	5.40786
10	105451555	105452474	ENSG00000107957	0.548729	0.00434803	promoter	105361503	105561055	-	0.548729	SH3PXD2A	25.0594	17.1023	16.3053	49.6467	29.3206	15.9258	29.9389	22.508	18.4017	27.1325	17.316	35.0844	14.421
10	105453103	105453457	ENSG00000107957	0.540972	0	promoter	105361503	105561055	-	0.540972	SH3PXD2A	4.69864	6.13103	4.07632	10.9874	7.60163	5.97219	7.69857	6.6501	4.95431	5.08735	5.49042	9.12194	3.00437
10	105456250	105456557	ENSG00000107957	0.525201	-2868	distal	105361503	105561055	-	0.525201	SH3PXD2A	17.7504	1.1294	6.11448	8.54574	7.60163	6.96755	12.4032	16.881	12.0319	11.8705	10.9808	6.31519	6.91004
10	105464007	105464363	ENSG00000107957	0.486329	-10625	distal	105361503	105561055	-	0.486329	SH3PXD2A	4.69864	2.90417	3.39694	4.0694	4.34379	2.98609	0.855396	3.58082	4.24655	0.423946	1.26702	2.80675	2.40349
10	105472631	105473068	ENSG00000107957	0.443113	-19249	distal	105361503	105561055	-	0.443113	SH3PXD2A	6.78692	2.74283	6.11448	8.54574	8.1446	4.31325	11.1201	3.58082	3.53879	9.32681	7.17978	7.01688	5.70829
10	105518926	105519109	ENSG00000107957	0.211118	0.210196	promoter	105361503	105561055	-	0.211118	SH3PXD2A	0	0	1.35877	1.62776	2.17189	0.331788	5.56007	2.04619	0.707759	1.27184	1.68936	0.701688	0.90131
10	105531881	105532688	ENSG00000107957	0.146197	0.142148	promoter	105361503	105561055	-	0.146197	SH3PXD2A	13.0518	2.42014	4.07632	24.4164	12.4884	14.5987	17.1079	13.8118	16.6323	11.0226	8.86915	8.42025	11.4166
10	105541140	105541807	ENSG00000107957	0.0997985	0.0964511	promoter	105361503	105561055	-	0.0997985	SH3PXD2A	16.7063	0.322686	2.03816	20.347	16.2892	36.8285	19.2464	4.09237	3.53879	4.6634	5.49042	4.21013	6.00873
10	105560573	105560804	ENSG00000107957	0.00241541	0.00125281	promoter	105361503	105561055	-	0.00241541	SH3PXD2A	2.61036	0.161343	0.679387	3.25552	5.42974	1.65894	2.13849	2.55773	6.01595	2.54367	4.64574	3.50844	4.50655
10	105619097	105619254	ENSG00000107957	-3795	-3795	distal	105353784	105615301	-	-3795	SH3PXD2A	4.17657	0.806714	4.07632	3.25552	2.71487	4.31325	4.70468	4.60392	1.06164	2.54367	4.64574	2.10506	1.80262
10	10562763	10563177	ENSG00000270111	-58450	-58450	distal	10461501	10504312	-	-58450	RP11-271F18.4	2.61036	0	0.679387	2.44164	6.51568	2.32252	0.855396	7.16165	10.6164	11.8705	12.6702	8.42025	0.90131
10	105647927	105648406	ENSG00000107960	0.688419	-8407	distal	105642503	105659911	-	0.688419	OBFC1	6.26485	6.29237	9.51142	6.51104	5.42974	5.6404	12.8309	5.62701	6.36983	5.93524	11.8255	11.9287	3.00437
10	105654205	105654370	ENSG00000107960	0.32778	0.318244	promoter	105642503	105659911	-	0.32778	OBFC1	0.522071	0.645371	0.679387	0	0.542974	1.65894	1.28309	3.06928	1.7694	4.6634	7.60213	4.21013	0.300437
10	105655317	105655779	ENSG00000107960	0.263902	0.237305	promoter	105642503	105659911	-	0.263902	OBFC1	3.13243	6.7764	8.83203	4.88328	1.62892	3.64967	1.71079	9.20783	6.01595	4.6634	4.64574	6.31519	0.600873
10	105667863	105668509	ENSG00000107960	0.281799	-7951	distal	105642313	105677888	-	0.281799	OBFC1	46.4643	49.8549	45.5189	24.4164	17.9181	24.8841	20.1018	41.4353	32.5569	29.6762	29.1415	25.9625	29.1423
10	105677504	105678581	ENSG00000107960	0.0107941	0	promoter	105642313	105677888	-	0.0107941	OBFC1	51.685	49.5322	50.954	40.2871	33.6644	26.2113	53.89	47.5738	55.2052	43.2425	47.7245	28.0675	59.4864
10	105695945	105696112	ENSG00000107960	-17981	-17981	distal	105642300	105677963	-	-17981	OBFC1	2.08828	0.968057	1.35877	0.40694	0.542974	0	4.70468	0.511546	1.06164	0.847892	0	1.40338	1.50218
10	105726545	105726765	ENSG00000065613	-193	-193	promoter	105726959	105788991	+	-193	SLK	3.13243	4.35626	6.11448	6.1041	5.42974	3.64967	2.13849	3.58082	1.7694	4.23946	5.06808	7.01688	3.60524
10	105727648	105728070	ENSG00000065613	0.0111072	0.011091	promoter	105726959	105788991	+	0.0111072	SLK	9.39728	6.29237	2.71755	6.1041	5.97271	2.6543	8.12626	8.18474	6.72371	7.20708	13.0925	7.01688	5.10742
10	105743082	105743627	ENSG00000065613	0.259914	-8509	distal	105726959	105788991	+	0.259914	SLK	4.69864	19.3611	14.9465	5.69716	2.71487	2.32252	5.56007	2.55773	3.53879	13.5663	11.4032	7.71857	4.20611
10	105749973	105750327	ENSG00000065613	0.371002	-15400	distal	105726959	105788991	+	0.371002	SLK	2.08828	1.1294	4.07632	1.62776	0	0.663576	8.55396	4.60392	2.12328	1.27184	3.80106	2.10506	0.600873
10	105849417	105849725	ENSG00000065618	-3656	-3656	distal	105791044	105845760	-	-3656	COL17A1	0	0.161343	2.03816	2.0347	3.80082	6.30397	3.42158	3.58082	2.83104	1.27184	4.2234	1.40338	0.90131
10	105853542	105853902	ENSG00000065618	-7781	-7781	distal	105791044	105845760	-	-7781	COL17A1	0	0.968057	3.39694	4.88328	7.60163	2.6543	5.13238	7.6732	6.72371	2.11973	2.1117	1.40338	0.300437
10	105863832	105863997	ENSG00000156384	-17818	-17818	distal	105881816	105883121	+	-17818	SFR1	1.04414	1.45209	0.679387	0.40694	0.542974	1.32715	1.28309	1.53464	1.06164	2.96762	0.844681	4.21013	0.600873
10	105864036	105864983	ENSG00000156384	-16832	-16832	distal	105881816	105883121	+	-16832	SFR1	7.309	3.54954	4.07632	8.1388	9.77353	14.9305	5.56007	9.20783	6.72371	6.78313	12.2479	12.6304	2.10306
10	105869731	105870029	ENSG00000156384	-11786	-11786	distal	105881816	105883121	+	-11786	SFR1	0.522071	1.77477	2.03816	4.47634	3.80082	4.64503	3.84928	6.6501	4.60043	4.6634	5.06808	4.21013	2.40349
10	105880521	105882122	ENSG00000156384	-0.412566	0	promoter	105882005	105885602	+	-0.412566	SFR1	114.856	78.5739	100.549	90.7476	73.3014	81.2881	105.641	105.379	91.3009	114.889	108.541	70.1688	112.964
10	105887233	105887613	ENSG00000156384	1089	1630	distal	105881923	105886143	+	1089	SFR1	5.22071	0.161343	1.35877	6.1041	9.23055	0.995364	8.12626	1.53464	0.353879	2.96762	3.37872	7.01688	0.600873
10	105991921	105992472	ENSG00000197748	0.00612245	0	promoter	105963188	105992098	-	0.00612245	WDR96	18.7946	2.90417	1.35877	23.1956	29.3206	15.2623	31.6497	20.9734	26.8948	14.8381	17.7383	28.0675	26.7389
10	105996315	105996595	ENSG00000148834	0.0491367	0.0490958	promoter	105995114	106019556	+	0.0491367	GSTO1	3.13243	3.3882	3.39694	2.0347	1.08595	1.99073	3.42158	1.53464	3.53879	1.69578	3.80106	2.10506	6.00873
10	106006600	106007045	ENSG00000148834	0.469929	-6876	distal	105995114	106019556	+	0.469929	GSTO1	4.69864	2.42014	4.07632	2.44164	1.08595	2.32252	3.42158	10.7425	12.3858	11.0226	11.8255	1.40338	1.80262
10	106014385	106014585	ENSG00000148834	-0.00848923	0	promoter	106014493	106027215	+	-0.00848923	GSTO1	3.13243	3.06551	3.39694	4.88328	2.17189	3.31788	2.56619	4.60392	3.18492	2.11973	3.37872	2.80675	4.20611
10	106015012	106015618	ENSG00000148834	0.00743403	0.00735234	promoter	106014921	106027162	+	0.00743403	GSTO1	7.83107	5.80834	8.83203	10.9874	7.05866	7.29934	8.98166	9.71938	8.84699	7.63102	8.86915	6.31519	4.80698
10	106027802	106029212	ENSG00000266852	3.86598	0	promoter	106028080	106028177	-	3.86598	MIR4482-1	71.5237	77.2832	68.6181	73.6562	61.899	44.4596	79.9795	64.9664	73.253	69.1032	69.6861	40.6979	71.8043
10	106034379	106034572	ENSG00000065621	0.179954	-76	promoter	106028939	106059169	+	0.179954	GSTO2	0.522071	0.968057	3.39694	1.22082	3.25784	3.64967	2.56619	1.53464	1.41552	1.69578	2.1117	3.50844	1.50218
10	106034657	106034822	ENSG00000065621	-0.00125568	0	promoter	106034678	106051402	+	-0.00125568	GSTO2	0.522071	1.29074	0.679387	3.25552	3.80082	2.32252	1.28309	1.02309	0	1.69578	0.844681	4.21013	1.50218
10	106044717	106044954	ENSG00000065621	0.396606	-741	promoter	106034924	106059616	+	0.396606	GSTO2	1.04414	0.322686	0.679387	6.91798	9.23055	1.99073	1.71079	1.02309	1.06164	0.847892	1.26702	2.10506	1.50218
10	106047288	106047543	ENSG00000065621	0.118101	0.118027	promoter	106045696	106059176	+	0.118101	GSTO2	0.522071	0.484028	0.679387	8.1388	2.17189	7.63113	1.28309	1.53464	0.707759	3.81551	2.95638	6.31519	3.3048
10	106051090	106051655	ENSG00000065621	0.400148	-3377	distal	106045696	106059176	+	0.400148	GSTO2	14.618	11.294	11.5496	13.0221	15.7462	6.30397	12.8309	14.8348	7.43147	13.9902	16.0489	10.5253	13.2192
10	106060359	106061112	ENSG00000065621	0.854145	1189	distal	106034920	106064703	+	0.854145	GSTO2	57.9499	23.8787	23.0992	52.4953	47.2387	33.5106	74.4195	21.9965	24.7716	47.058	45.6128	35.0844	65.1947
10	106065493	106065775	ENSG00000065621	789	-6123	distal	106034920	106064703	+	789	GSTO2	17.2283	1.45209	4.75571	7.73186	10.8595	6.96755	17.1079	11.254	10.2625	6.35919	7.60213	12.6304	15.6227
10	106068254	106068774	ENSG00000148841	3119	-3124	distal	106071894	106098162	-	3119	ITPRIP	8.87521	12.1007	10.1908	8.1388	9.77353	7.63113	7.69857	12.7887	14.5091	11.8705	9.29149	8.42025	20.4297
10	106081722	106082641	ENSG00000148841	0.656243	-485	promoter	106075467	106093663	-	0.656243	ITPRIP	19.8387	27.9123	27.1755	23.1956	22.2619	14.5987	13.6863	10.7425	13.0935	16.1099	16.4713	23.1557	43.5633
10	106088865	106089425	ENSG00000148841	0.263684	-182	promoter	106075467	106093663	-	0.263684	ITPRIP	15.6621	3.22686	6.11448	17.9054	24.4338	42.8007	2.13849	14.8348	19.4634	39.427	57.0159	25.9625	13.2192
10	106096920	106097177	ENSG00000148841	0.0472819	0.03746	promoter	106071894	106098162	-	0.0472819	ITPRIP	5.74278	11.9394	10.8702	4.47634	1.62892	3.31788	1.71079	5.11546	6.01595	9.32681	5.06808	6.31519	11.717
10	106098154	106098611	ENSG00000148841	0.000304553	0	promoter	106071894	106098162	-	0.000304553	ITPRIP	19.8387	15.4889	12.9084	13.429	9.77353	10.949	17.1079	11.7656	9.55475	11.8705	10.9808	11.227	15.6227
10	106099347	106099900	ENSG00000148841	-1184	-1184	promoter	106071894	106098162	-	-1184	ITPRIP	13.0518	19.6838	25.8167	19.1262	12.4884	18.2483	5.56007	20.4619	20.525	16.5339	22.8064	25.2608	27.9406
10	106109310	106110175	ENSG00000231233	1173	1173	distal	106111349	106113333	-	1173	CCDC147-AS1	73.612	40.8197	52.3128	56.5647	41.266	33.1788	31.222	63.9433	55.913	86.4849	78.133	53.3283	82.0192
10	106111750	106112109	ENSG00000231233	0.797883	0.616431	promoter	106111349	106113333	-	0.797883	CCDC147-AS1	48.0305	23.3947	16.9847	16.6845	12.4884	19.5755	19.6741	25.0658	21.9405	28.8283	29.5638	24.5591	36.6533
10	106113152	106113619	ENSG00000231233	0.0912298	0	promoter	106111349	106113333	-	0.0912298	CCDC147-AS1	48.0305	31.1392	25.1373	32.1483	33.1214	16.5894	43.1975	29.1581	28.6642	11.0226	15.6266	22.454	47.469
10	10631618	10631869	ENSG00000270111	-127305	-127305	distal	10461501	10504312	-	-127305	RP11-271F18.4	1.04414	0.322686	0.679387	2.44164	2.71487	1.65894	0.855396	7.6732	3.89267	1.69578	4.64574	5.6135	1.20175
10	106342198	106342642	ENSG00000237761	-33217	-33217	distal	106375860	106376731	+	-33217	RP11-127O4.2	8.87521	0.161343	0	10.9874	14.1173	9.62185	1.28309	3.06928	1.7694	3.39157	4.2234	2.80675	13.8201
10	107310314	107310691	ENSG00000207068	15790	15790	distal	107294417	107294523	+	15790	RNU6-463P	1.56621	0.322686	0.679387	1.22082	0.542974	6.96755	0.427698	3.06928	0	2.11973	1.26702	4.21013	0
10	10741402	10741865	ENSG00000228997	76320	76320	distal	10818186	10818624	-	76320	RP1-186E20.1	3.6545	0	0	1.62776	1.08595	0.663576	0.855396	11.254	10.2625	6.35919	3.80106	1.40338	1.50218
10	107557084	107557595	ENSG00000229466	10937	10937	distal	107568533	107578955	-	10937	RP11-56I23.1	1.56621	2.58148	2.71755	1.22082	2.71487	2.6543	18.391	3.06928	5.66207	4.6634	4.2234	6.31519	3.00437
10	107567727	107568277	ENSG00000229466	255	255	promoter	107568533	107578955	-	255	RP11-56I23.1	8.35314	7.9058	12.9084	2.0347	3.80082	3.98146	8.55396	6.6501	7.07759	0.847892	3.37872	7.71857	3.00437
10	107685161	107685582	ENSG00000229466	-106205	-106205	distal	107568533	107578955	-	-106205	RP11-56I23.1	1.56621	1.77477	4.07632	0.40694	1.62892	0.995364	9.40936	2.04619	0	0.847892	1.26702	4.21013	2.10306
10	107711926	107712201	ENSG00000229466	-132970	-132970	distal	107568533	107578955	-	-132970	RP11-56I23.1	3.13243	3.87223	5.4351	2.84858	4.34379	0.995364	4.70468	3.06928	2.83104	1.27184	1.68936	6.31519	4.50655
10	107734709	107734963	ENSG00000229466	-155753	-155753	distal	107568533	107578955	-	-155753	RP11-56I23.1	5.74278	4.35626	5.4351	1.62776	2.71487	3.31788	8.55396	8.18474	7.07759	0.423946	1.26702	2.80675	1.20175
10	107935624	107935913	ENSG00000229775	0.495331	-8229	distal	107923106	107948378	+	0.495331	RP11-298H24.1	1.56621	0.806714	2.03816	0.40694	0.542974	0.331788	9.40936	0.511546	0.353879	0.423946	3.80106	0.701688	0.90131
10	1082167	1082583	ENSG00000232656	0.629772	5649	distal	1068608	1090138	+	0.629772	IDI2-AS1	9.91935	1.93611	2.03816	4.47634	8.68758	5.6404	20.9572	4.60392	2.83104	3.39157	5.49042	12.6304	2.40349
10	10824679	10824879	ENSG00000225383	1520	-6054	distal	10826400	10836920	-	1520	SFTA1P	2.61036	0.161343	1.35877	0	2.17189	0.331788	0	6.6501	4.24655	0	1.26702	1.40338	0.90131
10	108384702	108384994	ENSG00000108018	0.479452	0.447848	promoter	108379876	108389147	-	0.479452	SORCS1	6.26485	2.58148	2.71755	2.44164	2.71487	3.31788	2.99389	2.55773	1.7694	2.54367	2.53404	4.91182	6.91004
10	108412201	108412443	ENSG00000108018	0.871898	14398	distal	108336964	108924284	-	0.871898	SORCS1	1.56621	0	0.679387	0.40694	0	2.6543	14.114	1.53464	3.18492	1.27184	2.95638	3.50844	1.20175
10	108414961	108415683	ENSG00000108018	0.867198	11158	distal	108336964	108924284	-	0.867198	SORCS1	12.0076	8.87385	9.51142	0	0.542974	3.64967	26.945	2.55773	0.707759	1.27184	1.68936	3.50844	5.40786
10	108420804	108421379	ENSG00000108018	0.85725	5462	distal	108336964	108924284	-	0.85725	SORCS1	9.39728	8.87385	4.75571	1.22082	3.25784	3.64967	7.27087	6.13856	2.47716	0.847892	2.95638	1.40338	8.11179
10	108442068	108442227	ENSG00000108018	0.821045	-7220	distal	108336964	108924284	-	0.821045	SORCS1	0	0.161343	0.679387	0	0	0.663576	5.56007	1.02309	0	1.69578	1.26702	0.701688	1.80262
10	108623827	108624133	ENSG00000108018	0.511573	-105645	distal	108336964	108924284	-	0.511573	SORCS1	3.13243	1.45209	2.03816	3.25552	3.80082	4.64503	2.99389	1.02309	2.12328	0	2.53404	0.701688	10.8157
10	108691218	108691490	ENSG00000108018	0.39683	-38288	distal	108336964	108924284	-	0.39683	SORCS1	5.22071	1.77477	2.03816	7.32492	8.68758	3.64967	0.855396	1.53464	0.707759	1.27184	2.1117	1.40338	9.31353
10	108695631	108696175	ENSG00000108018	0.389316	-33603	distal	108336964	108924284	-	0.389316	SORCS1	30.2801	6.7764	9.51142	16.6845	15.7462	12.6079	1.71079	3.58082	2.83104	2.11973	2.95638	9.12194	24.9362
10	108719305	108719584	ENSG00000108018	0.349007	-10194	distal	108336964	108924284	-	0.349007	SORCS1	4.17657	3.71088	3.39694	2.44164	4.88676	3.31788	0.855396	3.58082	1.7694	2.54367	2.95638	2.80675	6.30917
10	1089531	1089764	ENSG00000067064	0.853947	-1235	promoter	1088617	1094875	-	0.853947	IDI1	0.522071	4.19491	4.07632	2.0347	2.71487	2.6543	1.28309	0.511546	1.41552	1.27184	1.26702	2.80675	1.20175
10	10911509	10911906	ENSG00000229240	57114	64996	distal	10969021	10988765	-	57114	LINC00710	0.522071	0.322686	0.679387	5.29022	3.25784	6.30397	2.13849	8.18474	3.18492	1.69578	1.68936	4.91182	2.70393
10	109169465	109169655	ENSG00000200079	-51662	-51662	distal	109221318	109221427	+	-51662	RNA5SP326	5.22071	0.322686	0.679387	0	0.542974	0.663576	0.427698	1.53464	3.18492	2.11973	2.53404	0.701688	0.600873
10	109185794	109186291	ENSG00000200079	-35026	-35026	distal	109221318	109221427	+	-35026	RNA5SP326	10.4414	8.22848	10.8702	5.29022	7.60163	8.95828	0.855396	11.7656	13.4474	10.5986	6.75744	8.42025	7.21048
10	109201674	109202132	ENSG00000200079	-19185	-19185	distal	109221318	109221427	+	-19185	RNA5SP326	6.78692	0.161343	0.679387	2.44164	2.17189	0.331788	1.71079	4.09237	4.95431	4.23946	3.37872	0.701688	7.51091
10	1094564	1095835	ENSG00000067064	0.0496964	0	promoter	1088617	1094875	-	0.0496964	IDI1	65.781	89.7066	75.412	61.8549	59.7271	40.1464	54.7454	65.4779	62.6367	68.2553	56.1713	49.1182	75.4096
10	110118704	110118892	ENSG00000234544	62413	62413	distal	110055857	110056290	+	62413	PTGES3P5	2.61036	0.161343	1.35877	4.88328	7.60163	3.64967	0.855396	1.02309	0.353879	2.96762	4.2234	1.40338	0.300437
10	1101873	1102431	ENSG00000047056	-0.01171	0	promoter	1102344	1142566	+	-0.01171	WDR37	9.39728	14.8435	13.5877	7.73186	8.1446	11.9444	14.9694	12.2771	14.1552	9.32681	11.8255	4.91182	5.70829
10	1102507	1102916	ENSG00000047056	-0.00386393	0	promoter	1102798	1178110	+	-0.00386393	WDR37	8.35314	7.09908	10.1908	4.88328	7.60163	9.62185	4.27698	6.6501	4.60043	8.90286	8.02447	3.50844	9.31353
10	110304212	110304660	ENSG00000203434	3072	3072	distal	110307733	110321573	-	3072	RP11-163F15.1	8.87521	6.13103	10.8702	6.1041	4.34379	2.98609	6.84317	4.60392	3.18492	6.35919	10.1362	11.227	10.5153
10	110609968	110610341	ENSG00000224498	648	648	distal	110607944	110609319	+	648	MAPKAPK5P1	2.61036	2.09746	2.03816	5.69716	2.71487	0.663576	0.427698	6.6501	10.9703	2.54367	3.37872	11.9287	1.20175
10	110632677	110633040	ENSG00000224498	23357	23357	distal	110607944	110609319	+	23357	MAPKAPK5P1	2.08828	0.645371	0	0.81388	0.542974	1.32715	0.427698	4.09237	10.6164	2.11973	1.26702	2.10506	1.20175
10	11155271	11155496	ENSG00000048740	0.303907	-14834	distal	11060106	11373245	+	0.303907	CELF2	4.17657	1.61343	4.07632	4.47634	1.62892	3.31788	6.84317	3.06928	2.83104	4.6634	5.06808	4.91182	1.20175
10	111612255	111612783	ENSG00000108039	11740	-16832	distal	111624524	111674833	-	11740	XPNPEP1	10.4414	3.87223	4.07632	6.1041	2.71487	3.64967	8.55396	4.09237	3.53879	5.08735	9.29149	7.01688	5.40786
10	111643987	111644377	ENSG00000108039	0.985492	0	promoter	111643864	111652342	-	0.985492	XPNPEP1	5.74278	4.03357	5.4351	8.95268	8.1446	2.32252	12.4032	6.6501	4.60043	6.78313	6.75744	6.31519	6.6096
10	111652156	111652517	ENSG00000108039	0.591074	0	promoter	111651478	111653136	-	0.591074	XPNPEP1	5.22071	2.90417	2.71755	1.62776	1.08595	0.995364	2.13849	6.6501	6.01595	2.96762	4.64574	2.10506	0.90131
10	111662725	111663657	ENSG00000108039	0.298725	0.241271	promoter	111651337	111667576	-	0.298725	XPNPEP1	19.3166	37.4315	45.5189	15.8707	11.9454	5.97219	48.3299	13.8118	14.5091	22.0452	23.2287	12.6304	3.90567
10	111674655	111675157	ENSG00000108039	0.0105685	0	promoter	111648254	111674937	-	0.0105685	XPNPEP1	17.2283	3.3882	6.11448	5.29022	9.23055	5.97219	22.2403	18.9272	26.541	33.0678	36.3213	9.82363	19.5284
10	111682768	111682939	ENSG00000108039	0.0115685	0.00669985	promoter	111646028	111683198	-	0.0115685	XPNPEP1	2.08828	3.22686	2.71755	1.62776	3.80082	3.64967	1.28309	1.02309	0.707759	1.69578	2.53404	2.10506	2.40349
10	111683069	111683384	ENSG00000108039	0.00347054	0	promoter	111646028	111683198	-	0.00347054	XPNPEP1	7.83107	8.55117	4.75571	3.25552	2.71487	3.64967	8.55396	6.6501	5.66207	5.5113	5.49042	4.21013	8.41222
10	111716457	111716825	ENSG00000203876	-2807	-2807	distal	111705330	111713649	-	-2807	RP11-451M19.3	4.69864	7.58311	9.51142	10.1735	14.1173	3.31788	4.70468	5.62701	5.30819	5.93524	4.64574	9.12194	5.40786
10	111738321	111738573	ENSG00000148700	-17552	-17552	distal	111756126	111878366	+	-17552	ADD3	2.61036	5.00163	5.4351	3.66246	3.25784	0.663576	3.84928	2.55773	2.47716	4.23946	6.3351	4.21013	1.80262
10	111756139	111756328	ENSG00000148700	0.000106348	9.81675e-05	promoter	111756126	111878366	+	0.000106348	ADD3	1.04414	1.29074	0	4.0694	1.62892	2.32252	0	1.02309	1.06164	5.5113	7.60213	4.21013	0.300437
10	111767037	111768201	ENSG00000148700	-0.00891622	0	promoter	111768010	111877137	+	-0.00891622	ADD3	43.3319	50.5003	51.6334	38.2524	28.2346	31.8517	34.6435	40.9237	41.4039	30.948	35.0542	25.2608	41.4602
10	111768343	111768786	ENSG00000148700	0.00305149	0.00304233	promoter	111768010	111877137	+	0.00305149	ADD3	9.91935	18.0704	21.061	13.0221	6.51568	7.29934	14.9694	7.6732	7.43147	11.4465	10.5585	8.42025	9.31353
10	111769950	111770129	ENSG00000148700	0.0177775	0.0177683	promoter	111768010	111877137	+	0.0177775	ADD3	2.08828	6.93774	2.03816	3.25552	3.25784	2.32252	1.71079	1.02309	0.353879	4.23946	7.17978	2.10506	2.10306
10	111796897	111797306	ENSG00000148700	0.205057	0.205047	promoter	111776193	111877160	+	0.205057	ADD3	0	9.68057	11.5496	9.35962	3.80082	0.331788	2.99389	7.6732	6.72371	2.54367	2.53404	11.9287	9.61397
10	111818310	111818475	ENSG00000148700	0.417136	-18287	distal	111776193	111877160	+	0.417136	ADD3	1.56621	2.09746	3.39694	0.81388	1.08595	0.331788	0	1.02309	0.353879	0.423946	0.844681	3.50844	0.600873
10	111827784	111828208	ENSG00000148700	0.510969	-8554	distal	111776193	111877160	+	0.510969	ADD3	7.83107	18.3931	16.3053	18.7192	15.2033	6.63576	6.41547	11.254	11.678	5.08735	8.02447	10.5253	15.6227
10	111829400	111829864	ENSG00000148700	0.526974	-6898	distal	111776193	111877160	+	0.526974	ADD3	8.87521	15.4889	16.3053	8.95268	10.8595	9.95364	12.8309	7.16165	7.78535	13.5663	7.17978	18.9456	12.3179
10	111836311	111837093	ENSG00000148700	-0.0111909	0	promoter	111836763	111877153	+	-0.0111909	ADD3	21.927	47.2734	38.7251	23.6025	19.5471	20.9026	17.1079	24.0427	28.6642	40.2749	34.2096	30.1726	40.8594
10	111837383	111837576	ENSG00000148700	0.0153503	0.0153256	promoter	111836763	111877153	+	0.0153503	ADD3	2.61036	10.0033	6.79387	1.22082	3.80082	2.98609	1.71079	3.06928	3.18492	5.93524	7.17978	4.21013	4.20611
10	111841881	111842072	ENSG00000148700	0.0642259	0.0642036	promoter	111838997	111883901	+	0.0642259	ADD3	0.522071	8.38982	7.47326	4.47634	3.25784	0.331788	0.427698	10.2309	4.95431	5.08735	5.49042	2.10506	2.70393
10	111845601	111846325	ENSG00000148700	0.147069	0.147047	promoter	111838997	111883901	+	0.147069	ADD3	16.7063	30.1711	29.893	18.3123	24.9768	0.995364	0.427698	32.739	32.5569	2.54367	2.1117	2.10506	31.8463
10	11184766	11185073	ENSG00000048740	0.398098	-21919	distal	11060106	11373245	+	0.398098	CELF2	1.56621	0.322686	0.679387	4.88328	4.88676	0	0.855396	8.69629	6.01595	0.847892	1.26702	9.82363	4.80698
10	11187369	11187798	ENSG00000048740	0.406411	-19194	distal	11060106	11373245	+	0.406411	CELF2	5.74278	7.26043	10.1908	8.95268	5.97271	4.97682	3.84928	4.60392	10.6164	7.63102	8.44681	8.42025	4.80698
10	111896879	111897266	ENSG00000148700	1555	1705	distal	111767722	111895323	+	1555	ADD3	9.39728	7.42177	13.5877	8.95268	5.42974	8.95828	13.6863	7.16165	9.20087	7.20708	10.5585	11.227	10.2148
10	111898039	111898391	ENSG00000226734	580	580	distal	111898972	111899184	-	580	SNRPGP12	6.78692	4.03357	9.51142	4.88328	9.23055	9.95364	9.40936	6.6501	4.95431	8.05497	12.2479	7.71857	6.91004
10	11191471	11191844	ENSG00000048740	0.41951	-15148	distal	11060106	11373245	+	0.41951	CELF2	6.78692	0	0	5.69716	6.51568	0	1.28309	12.2771	18.7556	2.96762	2.53404	16.8405	0.300437
10	111922698	111922863	ENSG00000226734	-23513	-23513	distal	111898972	111899184	-	-23513	SNRPGP12	2.61036	1.45209	0	0	0.542974	0.331788	0.427698	0	0.353879	1.27184	0.844681	0.701688	0.600873
10	11192536	11192771	ENSG00000048740	0.422911	-14221	distal	11060106	11373245	+	0.422911	CELF2	5.22071	3.71088	4.75571	3.25552	4.88676	1.65894	2.56619	6.6501	5.30819	2.96762	2.53404	7.01688	2.10306
10	111952317	111952732	ENSG00000119950	-14630	-14630	distal	111967363	112047123	+	-14630	MXI1	3.13243	9.51922	8.15264	6.91798	6.51568	4.31325	3.42158	7.6732	1.7694	2.96762	1.26702	4.21013	1.20175
10	111960225	111960595	ENSG00000119950	-6767	-6767	distal	111967363	112047123	+	-6767	MXI1	6.78692	4.19491	2.71755	4.0694	1.08595	3.31788	0.855396	5.11546	1.7694	5.93524	3.37872	11.9287	5.70829
10	111967223	111967435	ENSG00000119950	-0.00175527	0	promoter	111967363	112047123	+	-0.00175527	MXI1	13.0518	10.81	10.8702	11.8013	10.3165	7.96291	17.1079	8.69629	3.89267	3.81551	4.2234	7.71857	9.61397
10	111969286	111969783	ENSG00000119950	0.0254749	-205	promoter	111967442	112039827	+	0.0254749	MXI1	19.3166	30.8165	34.6487	19.9401	21.7189	12.9397	14.9694	15.8579	11.678	10.1747	5.06808	19.6473	11.717
10	111970050	111970216	ENSG00000119950	0.000799738	0.000786627	promoter	111969989	112046264	+	0.000799738	MXI1	5.74278	11.9394	12.229	9.76656	5.97271	7.96291	3.42158	4.09237	7.43147	4.23946	2.53404	4.21013	2.70393
10	111970644	111971248	ENSG00000119950	0.00858735	0.00857424	promoter	111969989	112046264	+	0.00858735	MXI1	68.9134	54.3725	55.0304	46.3912	42.3519	42.1371	37.2097	43.4814	33.2647	29.6762	25.7628	44.908	61.5895
10	111981450	111982061	ENSG00000119950	0.150259	-3689	distal	111969989	112046264	+	0.150259	MXI1	38.6333	35.9794	44.1602	29.2997	29.8636	25.8795	37.2097	38.366	41.4039	27.5565	35.8989	37.1895	44.1642
10	111985381	111985763	ENSG00000119950	-0.00611439	0	promoter	111985751	112046264	+	-0.00611439	MXI1	19.8387	14.1982	15.6259	10.9874	14.1173	13.6033	23.0957	8.69629	9.20087	15.686	11.8255	13.3321	21.331
10	111985865	111986645	ENSG00000119950	0.000389778	0.000372831	promoter	111985842	112044850	+	0.000389778	MXI1	21.4049	22.104	33.29	14.2429	17.9181	13.2715	23.9511	16.3695	21.9405	22.4691	22.8064	14.0338	24.0349
10	111987080	111987283	ENSG00000119950	-0.000761931	0	promoter	111987124	112044872	+	-0.000761931	MXI1	6.26485	3.71088	3.39694	10.1735	4.34379	2.98609	7.69857	7.16165	6.01595	3.39157	4.64574	4.21013	4.50655
10	112001160	112001808	ENSG00000119950	0.239206	0.239188	promoter	111987437	112044806	+	0.239206	MXI1	9.39728	15.6503	12.229	6.91798	2.17189	7.63113	9.40936	9.71938	13.8013	10.1747	11.8255	10.5253	10.8157
10	112009262	112009608	ENSG00000119950	0.380432	-7213	distal	111987437	112044806	+	0.380432	MXI1	8.87521	4.5176	4.07632	6.91798	4.88676	7.96291	5.56007	17.3926	15.5707	24.1649	12.2479	8.42025	23.1336
10	112011134	112011524	ENSG00000119950	0.413063	-5297	distal	111987437	112044806	+	0.413063	MXI1	12.0076	10.4873	11.5496	10.5804	7.05866	15.594	5.56007	17.9041	16.2785	26.2846	22.384	15.4371	20.1292
10	112014348	112014540	ENSG00000119950	0.469086	-2281	promoter	111987437	112044806	+	0.469086	MXI1	2.08828	3.87223	4.75571	1.62776	2.71487	0.331788	3.42158	1.53464	0.353879	0.423946	1.68936	0.701688	2.40349
10	112028292	112028618	ENSG00000119950	0.712144	10690	distal	111987437	112044806	+	0.712144	MXI1	2.08828	5.80834	4.07632	1.62776	2.17189	2.32252	2.99389	1.53464	1.06164	1.27184	1.26702	13.3321	3.60524
10	112029209	112029662	ENSG00000119950	0.728128	11607	distal	111987437	112044806	+	0.728128	MXI1	12.5297	8.38982	10.8702	4.47634	3.80082	2.98609	3.84928	12.2771	12.3858	15.262	10.5585	7.71857	16.2236
10	112039024	112039390	ENSG00000119950	0.899214	21422	distal	111987437	112044806	+	0.899214	MXI1	3.13243	2.2588	4.07632	2.84858	5.97271	1.32715	4.27698	4.09237	6.36983	4.6634	5.91276	10.5253	3.00437
10	11204991	11205472	ENSG00000048740	0.462686	-1520	promoter	11060106	11373245	+	0.462686	CELF2	12.5297	39.8517	31.9312	15.0568	8.68758	4.31325	10.2648	30.1812	31.1414	25.4367	15.2043	14.0338	22.2323
10	112064473	112065170	ENSG00000119953	0.030266	0	promoter	112057328	112064696	-	0.030266	SMNDC1	24.0153	31.6232	35.3281	24.8233	27.1487	21.2344	37.6374	29.6697	27.6026	33.0678	32.5202	30.1726	30.6445
10	112065888	112066174	ENSG00000119953	-1178	-1178	promoter	112050488	112064709	-	-1178	SMNDC1	9.39728	9.84191	12.229	9.35962	10.8595	5.6404	12.4032	8.18474	7.43147	10.5986	16.0489	10.5253	9.91441
10	11206733	11207362	ENSG00000048740	-0.00223566	0	promoter	11207103	11372602	+	-0.00223566	CELF2	34.4567	29.8484	14.2671	25.2303	23.3479	20.5709	21.8126	36.3198	32.203	27.5565	19.85	35.7861	27.9406
10	112071095	112071683	ENSG00000119953	-6385	-6385	distal	112050488	112064709	-	-6385	SMNDC1	7.83107	4.19491	8.15264	9.35962	3.80082	1.65894	12.4032	7.6732	3.89267	4.23946	8.44681	9.12194	6.6096
10	112078007	112078562	ENSG00000119953	-13297	-13297	distal	112050488	112064709	-	-13297	SMNDC1	1.04414	0.484028	0	9.35962	8.1446	5.97219	2.13849	10.2309	18.0479	5.5113	5.06808	8.42025	12.0175
10	11208031	11208447	ENSG00000048740	0.00330146	0.00329535	promoter	11207491	11371055	+	0.00330146	CELF2	24.0153	21.1359	26.4961	16.2776	20.633	10.949	22.668	18.4157	15.9246	19.0776	20.2723	21.7523	21.6314
10	112084161	112084967	ENSG00000119953	-19451	-19451	distal	112050488	112064709	-	-19451	SMNDC1	8.87521	8.38982	14.2671	31.3344	23.8908	8.62649	15.8248	2.55773	2.12328	20.3494	20.2723	35.7861	2.40349
10	112086525	112086746	ENSG00000119953	-21815	-21815	distal	112050488	112064709	-	-21815	SMNDC1	0.522071	0.806714	0.679387	8.1388	13.0314	1.65894	5.56007	0.511546	1.06164	2.11973	2.53404	2.10506	0.600873
10	112095771	112096229	ENSG00000119953	-31061	-31061	distal	112050488	112064709	-	-31061	SMNDC1	0.522071	0.806714	1.35877	14.2429	14.1173	2.98609	2.13849	8.18474	4.24655	3.39157	6.3351	4.91182	0.90131
10	112100602	112100802	ENSG00000119953	-35892	-35892	distal	112050488	112064709	-	-35892	SMNDC1	8.35314	2.74283	2.71755	5.69716	7.05866	2.98609	5.13238	7.6732	5.30819	3.39157	3.80106	0	4.20611
10	112104431	112104714	ENSG00000119953	-39721	-39721	distal	112050488	112064709	-	-39721	SMNDC1	0	4.35626	2.03816	7.73186	5.97271	2.32252	2.56619	9.71938	3.18492	2.54367	0.42234	12.6304	10.5153
10	112113167	112114266	ENSG00000119953	-48457	-48457	distal	112050488	112064709	-	-48457	SMNDC1	19.8387	21.2972	21.7404	50.4606	60.2701	25.5477	83.4011	93.1014	97.3169	15.686	24.9181	38.5928	31.2454
10	112114984	112115245	ENSG00000119953	-50274	-50274	distal	112050488	112064709	-	-50274	SMNDC1	27.1477	20.9746	13.5877	20.347	11.9454	12.2762	17.5356	7.6732	8.49311	5.93524	6.75744	16.8405	15.3223
10	112115961	112117098	ENSG00000119953	-51251	-51251	distal	112050488	112064709	-	-51251	SMNDC1	107.547	106.486	97.8317	80.1672	87.4188	67.6848	93.2382	80.8243	77.4996	82.2455	83.6234	77.8874	94.9379
10	112117174	112117422	ENSG00000119953	-52464	-52464	distal	112050488	112064709	-	-52464	SMNDC1	15.1401	9.68057	8.15264	10.1735	13.5743	8.95828	13.2586	9.71938	8.49311	5.08735	12.2479	12.6304	11.4166
10	112118080	112118313	ENSG00000119953	-53370	-53370	distal	112050488	112064709	-	-53370	SMNDC1	4.17657	25.8148	12.229	4.0694	3.80082	3.31788	2.56619	7.6732	4.60043	1.69578	3.37872	8.42025	4.20611
10	112121648	112122092	ENSG00000119953	-56938	-56938	distal	112050488	112064709	-	-56938	SMNDC1	8.87521	7.74445	7.47326	6.1041	3.80082	14.2669	8.12626	13.8118	13.8013	13.5663	23.6511	9.12194	7.21048
10	112124372	112124860	ENSG00000119953	-59662	-59662	distal	112050488	112064709	-	-59662	SMNDC1	7.83107	1.77477	2.71755	4.47634	3.25784	13.2715	20.9572	10.7425	8.13923	1.27184	3.80106	2.80675	1.20175
10	112127757	112128228	ENSG00000273143	60369	-63047	distal	112188598	112255945	-	60369	RP11-525A16.4	2.61036	10.1646	10.1908	8.54574	6.51568	9.62185	28.2281	8.18474	7.43147	9.32681	9.71383	12.6304	3.3048
10	112147718	112148480	ENSG00000273143	40117	-45518	distal	112188598	112255945	-	40117	RP11-525A16.4	6.78692	55.8246	42.8014	6.91798	5.42974	5.6404	17.9633	18.4157	12.3858	16.5339	11.8255	7.01688	16.2236
10	11214932	11215248	ENSG00000048740	0.0454929	-1592	promoter	11207491	11371055	+	0.0454929	CELF2	3.13243	1.61343	3.39694	10.9874	13.0314	6.30397	2.13849	16.881	17.694	7.20708	2.95638	21.7523	0.90131
10	112155381	112156042	ENSG00000273143	32555	-37956	distal	112188598	112255945	-	32555	RP11-525A16.4	28.1918	39.6903	42.8014	24.0095	24.4338	26.543	37.2097	43.993	36.8035	27.5565	29.1415	32.2776	35.1511
10	112167704	112168301	ENSG00000273143	20296	-25697	distal	112188598	112255945	-	20296	RP11-525A16.4	2.61036	16.1343	7.47326	13.0221	8.1446	8.2947	1.71079	14.8348	13.4474	4.23946	4.2234	13.3321	2.40349
10	112169466	112169746	ENSG00000273143	18851	-24252	distal	112188598	112255945	-	18851	RP11-525A16.4	3.6545	11.778	6.79387	2.84858	3.25784	1.32715	0.427698	9.20783	6.01595	2.54367	3.37872	7.01688	3.3048
10	112174048	112174837	ENSG00000273143	13760	-19161	distal	112188598	112255945	-	13760	RP11-525A16.4	91.3624	81.9621	101.229	78.9464	87.4188	47.7775	66.2932	100.263	106.518	61.0482	54.0596	68.0637	105.453
10	11217917	11218219	ENSG00000048740	0.0637426	-4577	distal	11207491	11371055	+	0.0637426	CELF2	20.8828	14.5209	12.9084	6.1041	6.51568	6.30397	8.12626	17.9041	19.1095	17.3818	16.0489	18.9456	5.70829
10	112180291	112180727	ENSG00000273143	7870	-13271	distal	112188598	112255945	-	7870	RP11-525A16.4	6.26485	12.4234	21.7404	3.66246	2.71487	3.64967	1.71079	10.7425	6.72371	19.9255	13.5149	8.42025	1.80262
10	112183556	112183766	ENSG00000273143	4831	-10232	distal	112188598	112255945	-	4831	RP11-525A16.4	2.61036	7.42177	4.07632	3.66246	2.71487	3.31788	1.28309	2.55773	3.89267	3.81551	3.37872	4.91182	3.60524
10	112185735	112186043	ENSG00000273143	2554	-7955	distal	112188598	112255945	-	2554	RP11-525A16.4	2.08828	3.87223	6.11448	14.6498	19.5471	1.99073	14.9694	17.9041	12.0319	3.39157	3.80106	9.82363	2.40349
10	112201396	112202001	ENSG00000273143	0.809969	7252	distal	112188598	112255945	-	0.809969	RP11-525A16.4	3.13243	18.0704	14.9465	13.836	14.1173	7.96291	20.1018	10.7425	10.9703	19.5015	18.1606	22.454	24.6358
10	11220402	11221028	ENSG00000048740	0.0789355	-7062	distal	11207491	11371055	+	0.0789355	CELF2	30.8022	32.7526	36.0075	27.265	20.633	16.9212	22.668	38.366	42.1117	23.741	27.4521	18.2439	33.3485
10	11221710	11222558	ENSG00000048740	0.0869323	-8370	distal	11207491	11371055	+	0.0869323	CELF2	21.4049	30.0098	19.0228	15.4637	23.8908	8.2947	13.6863	32.2274	36.0957	9.32681	13.0925	18.2439	9.31353
10	112217945	112218532	ENSG00000273143	0.564242	6946	distal	112188598	112255945	-	0.564242	RP11-525A16.4	5.22071	14.0368	6.79387	9.35962	7.60163	6.30397	2.99389	16.3695	13.0935	4.23946	5.06808	7.71857	4.20611
10	112220172	112221146	ENSG00000273143	0.531174	9173	distal	112188598	112255945	-	0.531174	RP11-525A16.4	20.8828	22.588	14.9465	46.3912	35.8363	43.1325	45.336	53.2008	40.3423	22.4691	16.0489	32.2776	30.6445
10	112252186	112252467	ENSG00000273143	0.178957	0.0516281	promoter	112234862	112255962	-	0.178957	RP11-525A16.4	12.0076	3.54954	4.07632	2.84858	1.62892	0.995364	4.27698	4.09237	3.18492	5.08735	5.91276	1.40338	1.20175
10	112255892	112256356	ENSG00000273143	0.00331754	0	promoter	112234862	112255962	-	0.00331754	RP11-525A16.4	1.56621	0.645371	1.35877	17.0915	7.60163	2.6543	8.98166	13.8118	16.6323	1.27184	4.64574	19.6473	0
10	112257374	112257720	ENSG00000138166	-0.0161973	0	promoter	112257596	112271302	+	-0.0161973	DUSP5	12.5297	13.3915	16.9847	8.1388	7.60163	4.64503	13.2586	8.18474	11.678	13.5663	19.0053	11.9287	19.5284
10	112261070	112261284	ENSG00000138166	0.253466	-1220	promoter	112257596	112271302	+	0.253466	DUSP5	8.35314	15.1662	11.5496	13.0221	7.05866	8.2947	12.8309	15.8579	13.4474	5.08735	6.75744	17.5422	9.0131
10	112262758	112263163	ENSG00000138166	0.0328999	0.0327698	promoter	112262505	112270195	+	0.0328999	DUSP5	27.1477	17.425	21.061	21.1609	15.7462	18.5801	4.70468	17.3926	16.9862	24.1649	22.384	28.0675	18.6271
10	112263586	112264314	ENSG00000138166	0.140572	0.140442	promoter	112262505	112270195	+	0.140572	DUSP5	50.6409	32.7526	42.8014	35.4038	33.6644	31.1881	56.8838	52.6893	39.2806	37.7312	46.8798	25.2608	75.4096
10	112272216	112272994	ENSG00000138166	913	2020	distal	112257596	112271302	+	913	DUSP5	21.4049	63.2464	43.4808	50.8675	41.266	14.2669	44.4806	47.5738	50.6048	38.1551	32.5202	20.3489	15.6227
10	11228394	11228648	ENSG00000048740	0.127797	-15054	distal	11207491	11371055	+	0.127797	CELF2	2.61036	2.2588	2.71755	1.22082	3.80082	1.65894	0.427698	6.6501	4.24655	2.96762	3.80106	2.80675	3.3048
10	112288747	112289076	ENSG00000138166	17444	20796	distal	112257596	112271302	+	17444	DUSP5	7.309	17.1023	21.7404	13.429	10.3165	2.6543	13.2586	15.3464	11.678	7.63102	7.17978	7.71857	7.51091
10	112295712	112296598	ENSG00000233518	13274	13274	distal	112309873	112310612	-	13274	RP11-73H14.1	33.4125	88.0932	99.8699	53.3092	43.9809	18.2483	36.782	74.6858	83.5156	24.1649	22.8064	25.9625	33.3485
10	112299821	112300188	ENSG00000233518	9684	9684	distal	112309873	112310612	-	9684	RP11-73H14.1	3.13243	25.9762	29.2136	4.88328	3.25784	0.995364	4.27698	3.58082	1.41552	2.11973	5.49042	4.91182	0.600873
10	112307007	112307182	ENSG00000233518	2690	2690	distal	112309873	112310612	-	2690	RP11-73H14.1	6.26485	2.2588	6.79387	4.47634	3.25784	3.64967	7.27087	1.53464	3.53879	6.35919	6.75744	4.21013	4.80698
10	112316780	112317217	ENSG00000233518	-6167	-6167	distal	112309873	112310612	-	-6167	RP11-73H14.1	8.35314	1.61343	1.35877	6.1041	4.34379	3.98146	12.8309	4.09237	4.24655	8.47892	7.17978	3.50844	6.91004
10	112326855	112327878	ENSG00000108055	-0.016078	0	promoter	112327449	112364394	+	-0.016078	SMC3	63.6927	61.1489	66.5799	53.3092	45.6098	45.1232	53.4623	72.128	70.422	86.9089	60.3947	39.2945	72.4052
10	112327970	112328303	ENSG00000108055	-0.00840705	0	promoter	112328085	112341764	+	-0.00840705	SMC3	3.13243	10.1646	6.79387	7.32492	3.80082	7.29934	5.13238	9.71938	6.01595	9.75075	6.75744	7.71857	5.70829
10	112360161	112360514	ENSG00000108055	0.885424	23941	distal	112327449	112364394	+	0.885424	SMC3	4.17657	1.61343	2.03816	4.47634	3.25784	1.65894	7.69857	4.09237	2.12328	0.423946	3.37872	1.40338	0.90131
10	112371969	112372168	ENSG00000108055	7574	21420	distal	112327449	112364394	+	7574	SMC3	1.04414	0.645371	2.71755	2.84858	2.17189	1.32715	1.28309	1.02309	0.707759	7.63102	4.2234	0.701688	0.90131
10	112373057	112373342	ENSG00000108055	8662	20246	distal	112327449	112364394	+	8662	SMC3	1.04414	0.968057	3.39694	6.51104	6.51568	5.97219	16.2525	1.02309	2.47716	6.35919	8.44681	7.01688	2.40349
10	11239119	11239689	ENSG00000048740	0.193368	-25779	distal	11207491	11371055	+	0.193368	CELF2	12.0076	9.35788	6.11448	15.8707	10.3165	4.64503	5.56007	25.5773	31.4953	21.1973	17.316	29.4709	9.61397
10	112401079	112401283	ENSG00000223302	1152	1152	distal	112402436	112402543	-	1152	Y_RNA	1.56621	2.74283	4.75571	3.25552	4.88676	2.6543	4.27698	0.511546	2.12328	2.11973	3.37872	2.10506	1.20175
10	112411276	112411622	ENSG00000203867	0.0365045	0.0364993	promoter	112404155	112599227	+	0.0365045	RBM20	1.56621	4.84028	4.75571	1.22082	0.542974	1.65894	1.28309	5.11546	1.06164	2.96762	3.37872	3.50844	2.10306
10	112431742	112432498	ENSG00000203867	0.14142	0.141414	promoter	112404155	112599227	+	0.14142	RBM20	25.0594	26.4602	13.5877	28.0789	22.8049	12.2762	29.0835	19.9503	16.6323	21.6212	20.2723	15.4371	19.2279
10	112477861	112478150	ENSG00000203867	0.37784	-38063	distal	112404155	112599227	+	0.37784	RBM20	2.61036	2.58148	3.39694	3.25552	3.80082	0.995364	0	1.02309	0	2.96762	5.91276	6.31519	0.600873
10	112483341	112483724	ENSG00000203867	0.405932	-32489	distal	112404155	112599227	+	0.405932	RBM20	1.56621	16.7796	11.5496	3.66246	3.25784	5.97219	7.27087	0	1.41552	2.11973	2.1117	5.6135	3.90567
10	112483932	112484542	ENSG00000203867	0.408962	-31671	distal	112404155	112599227	+	0.408962	RBM20	7.309	25.9762	21.7404	6.1041	5.97271	4.64503	1.71079	6.6501	4.60043	9.75075	10.5585	6.31519	3.60524
10	112525075	112525471	ENSG00000203867	0.619874	4074	distal	112404155	112599227	+	0.619874	RBM20	3.13243	1.77477	4.75571	3.25552	4.34379	3.64967	4.70468	6.13856	9.55475	5.5113	3.37872	4.21013	5.40786
10	112525777	112526116	ENSG00000203867	0.623472	4776	distal	112404155	112599227	+	0.623472	RBM20	0.522071	7.58311	6.11448	0.81388	2.17189	1.32715	1.71079	2.04619	1.7694	0.423946	1.68936	2.10506	3.00437
10	11252663	11252877	ENSG00000048740	0.276173	-39323	distal	11207491	11371055	+	0.276173	CELF2	1.04414	0	2.03816	5.29022	4.88676	0.663576	8.12626	7.16165	6.72371	6.35919	5.49042	4.91182	1.20175
10	112533759	112534339	ENSG00000203867	0.664391	12758	distal	112404155	112599227	+	0.664391	RBM20	41.2436	25.1695	37.3663	37.8454	51.5825	21.5662	34.2158	26.6004	46.3582	32.2199	38.8553	27.3658	72.4052
10	112562358	112563182	ENSG00000203867	0.810998	-20163	distal	112404155	112599227	+	0.810998	RBM20	5.22071	20.0065	18.3435	11.3943	15.2033	5.30861	5.98777	31.7159	24.7716	11.0226	13.0925	43.5047	13.5196
10	112563691	112564051	ENSG00000203867	0.817831	-19294	distal	112404155	112599227	+	0.817831	RBM20	4.69864	1.93611	6.79387	6.91798	8.1446	4.97682	8.12626	7.6732	5.66207	6.78313	8.02447	11.9287	5.70829
10	112578721	112578957	ENSG00000203867	0.89488	-4388	distal	112404155	112599227	+	0.89488	RBM20	2.61036	2.74283	0.679387	4.88328	1.08595	5.30861	3.42158	7.6732	9.20087	6.78313	5.06808	4.91182	3.90567
10	112583304	112583522	ENSG00000203867	-0.00529968	0	promoter	112583346	112591271	+	-0.00529968	RBM20	6.78692	1.93611	2.71755	2.84858	3.80082	4.64503	0.427698	6.6501	4.95431	8.90286	5.06808	5.6135	2.70393
10	112601540	112602094	ENSG00000203867	2312	5523	distal	112404155	112599227	+	2312	RBM20	37.067	21.1359	18.3435	39.0663	39.6371	32.5152	45.336	46.5507	35.3879	17.8057	14.3596	51.2232	48.3703
10	11260246	11260758	ENSG00000048740	0.322534	-46906	distal	11207491	11371055	+	0.322534	CELF2	1.04414	0.322686	2.03816	4.88328	7.05866	1.65894	23.5234	4.60392	6.72371	34.7636	29.1415	4.21013	0.600873
10	112602741	112603226	ENSG00000203867	3513	6724	distal	112404155	112599227	+	3513	RBM20	16.1842	30.1711	29.893	24.4164	22.2619	26.543	22.2403	27.112	19.1095	10.5986	16.4713	24.5591	31.8463
10	112611940	112612767	ENSG00000203867	12712	-16733	distal	112404155	112599227	+	12712	RBM20	19.3166	8.22848	8.83203	15.4637	15.7462	22.2298	9.83706	32.739	34.3263	24.5889	16.4713	17.5422	13.2192
10	112620337	112620924	ENSG00000232470	-8576	-8576	distal	112629501	112631352	+	-8576	RP11-313D6.3	10.4414	34.85	13.5877	7.73186	8.1446	6.63576	1.28309	8.18474	10.2625	7.63102	13.5149	12.6304	21.0306
10	112624365	112624796	ENSG00000232470	-4704	-4704	distal	112629501	112631352	+	-4704	RP11-313D6.3	23.4932	40.6584	38.7251	12.6151	18.4611	10.949	7.27087	20.9734	31.1414	10.1747	9.71383	16.8405	31.8463
10	112625456	112625825	ENSG00000232470	-3675	-3675	distal	112629501	112631352	+	-3675	RP11-313D6.3	12.0076	18.3931	19.0228	7.73186	7.05866	8.2947	5.98777	9.71938	13.4474	16.9578	11.4032	10.5253	9.61397
10	112631340	112631806	ENSG00000203497	0.275264	0	promoter	112629626	112631991	-	0.275264	PDCD4-AS1	14.618	23.2334	16.3053	15.4637	12.4884	9.29007	18.391	11.254	19.1095	17.3818	20.6947	14.0338	19.5284
10	112632424	112632829	ENSG00000150593	0.0447479	-432	promoter	112631713	112647602	+	0.0447479	PDCD4	12.0076	11.778	9.51142	11.3943	13.0314	9.62185	9.83706	10.2309	14.5091	22.0452	23.2287	8.42025	16.8244
10	112641759	112641922	ENSG00000150593	0.224896	0.224763	promoter	112640077	112647556	+	0.224896	PDCD4	3.13243	1.29074	1.35877	2.0347	2.71487	1.65894	2.99389	4.60392	3.89267	7.63102	8.02447	2.80675	7.51091
10	112653392	112653657	ENSG00000150593	0.370792	0.370668	promoter	112650396	112658476	+	0.370792	PDCD4	4.17657	4.35626	2.71755	7.32492	6.51568	3.64967	15.3971	9.20783	6.36983	6.35919	9.71383	7.01688	7.81135
10	112661956	112662329	ENSG00000214413	0.896537	0.503715	promoter	112659996	112678940	-	0.896537	BBIP1	13.0518	4.5176	2.71755	8.1388	2.71487	1.32715	8.98166	15.8579	10.9703	19.0776	19.0053	10.5253	11.1162
10	112678159	112679430	ENSG00000214413	0.63228	0	promoter	112677717	112678919	-	0.63228	BBIP1	120.076	108.261	93.076	77.3186	84.7039	60.3854	124.032	100.263	116.78	91.9962	104.74	96.8329	118.372
10	11267906	11268818	ENSG00000048740	0.369366	-54566	distal	11207491	11371055	+	0.369366	CELF2	21.4049	4.35626	4.07632	46.3912	51.0395	4.97682	23.0957	45.5276	44.2349	39.8509	32.5202	30.8743	11.1162
10	112708735	112709243	ENSG00000108061	0.647811	-11743	distal	112679761	112724487	+	0.647811	SHOC2	7.309	6.13103	5.4351	4.88328	2.17189	2.98609	5.13238	7.16165	10.6164	13.5663	8.44681	7.71857	7.21048
10	11274139	11274466	ENSG00000048740	0.407474	-60799	distal	11207491	11371055	+	0.407474	CELF2	0	0.161343	4.07632	5.69716	6.51568	0.663576	1.71079	9.71938	7.43147	5.5113	2.95638	8.42025	0.90131
10	112743329	112743536	ENSG00000108061	0.887458	-5147	distal	112724790	112745680	+	0.887458	SHOC2	0.522071	2.42014	1.35877	0.81388	1.62892	0.663576	0.427698	0.511546	0.707759	1.69578	0.42234	2.10506	0
10	112752847	112753406	ENSG00000108061	0.57847	4075	distal	112724609	112773424	+	0.57847	SHOC2	1.04414	18.7158	11.5496	2.84858	3.25784	0.331788	5.56007	5.62701	5.66207	2.11973	1.68936	1.40338	6.6096
10	112790194	112790356	ENSG00000108061	16768	41422	distal	112679305	112773425	+	16768	SHOC2	5.74278	0.806714	2.71755	0	2.17189	0	2.13849	0.511546	1.06164	0.847892	2.95638	3.50844	1.80262
10	11279513	11279977	ENSG00000048740	0.440329	-66173	distal	11207491	11371055	+	0.440329	CELF2	16.7063	24.2014	17.6641	11.3943	10.3165	9.95364	9.83706	11.7656	14.5091	3.81551	3.80106	4.21013	9.0131
10	112835976	112836138	ENSG00000150594	-651	-651	promoter	112836790	112840658	+	-651	ADRA2A	7.83107	0.322686	0.679387	5.69716	5.42974	3.31788	7.27087	1.53464	2.12328	3.39157	2.1117	3.50844	3.3048
10	11284300	11285076	ENSG00000048740	0.469596	-70960	distal	11207491	11371055	+	0.469596	CELF2	63.6927	49.5322	40.0838	39.8801	30.9495	44.4596	53.0346	44.5045	52.728	49.6017	35.0542	35.7861	60.3877
10	112853674	112854024	ENSG00000213247	-10689	-10689	distal	112864714	112865006	+	-10689	RP11-479A21.1	4.69864	0.484028	3.39694	1.22082	3.80082	0.995364	0.855396	7.16165	7.07759	1.27184	1.68936	4.91182	2.10306
10	11287238	11287894	ENSG00000048740	0.487558	-73898	distal	11207491	11371055	+	0.487558	CELF2	19.8387	29.5257	36.0075	32.5552	35.2933	21.898	23.0957	31.7159	28.3104	36.0354	33.3649	27.3658	18.6271
10	112888463	112888888	ENSG00000213247	23456	23456	distal	112864714	112865006	+	23456	RP11-479A21.1	4.17657	0.968057	1.35877	4.47634	3.80082	10.2854	2.56619	1.02309	1.41552	2.11973	2.53404	2.80675	5.10742
10	11288847	11289220	ENSG00000048740	0.497396	69576	distal	11207491	11371055	+	0.497396	CELF2	1.56621	1.61343	0.679387	10.5804	4.88676	2.32252	1.28309	14.8348	22.2944	8.90286	7.17978	9.12194	6.00873
10	112937326	112937791	ENSG00000213247	72319	72319	distal	112864714	112865006	+	72319	RP11-479A21.1	3.13243	0.161343	0.679387	5.29022	5.42974	10.949	2.99389	3.06928	1.41552	1.69578	1.68936	3.50844	6.6096
10	11295059	11295311	ENSG00000048740	0.535375	63485	distal	11207491	11371055	+	0.535375	CELF2	0	1.1294	2.71755	7.73186	7.05866	1.32715	6.41547	0.511546	0	3.39157	1.68936	4.91182	0.600873
10	11298089	11298442	ENSG00000048740	0.553899	60354	distal	11207491	11371055	+	0.553899	CELF2	5.74278	0.645371	3.39694	4.88328	1.62892	1.32715	2.99389	9.20783	8.84699	6.35919	7.60213	16.1388	5.10742
10	11303146	11303953	ENSG00000048740	0.584817	54843	distal	11207491	11371055	+	0.584817	CELF2	11.4856	4.84028	8.83203	8.95268	13.5743	4.64503	32.0774	25.5773	24.4177	17.8057	16.4713	11.227	4.20611
10	113057409	113057837	ENSG00000237618	-24698	-24698	distal	113082536	113083155	+	-24698	BTBD7P2	2.08828	0.484028	0.679387	0.81388	4.34379	6.63576	0.427698	1.53464	1.06164	1.69578	0.844681	3.50844	6.30917
10	113098348	113098945	ENSG00000227851	10751	10751	distal	113109697	113111861	-	10751	RP11-381K7.1	8.87521	5.32431	3.39694	15.4637	19.0041	19.5755	31.222	27.112	21.5866	11.0226	4.2234	27.3658	43.5633
10	113104635	113104797	ENSG00000227851	4899	4899	distal	113109697	113111861	-	4899	RP11-381K7.1	0.522071	0	0	1.22082	0.542974	0.331788	5.98777	1.02309	1.41552	1.69578	1.26702	2.10506	1.50218
10	113120074	113120372	ENSG00000227851	-8212	-8212	distal	113109697	113111861	-	-8212	RP11-381K7.1	3.6545	1.1294	3.39694	3.66246	5.42974	2.98609	10.6925	3.58082	3.53879	1.69578	6.75744	9.12194	13.5196
10	11312466	11312830	ENSG00000048740	0.641798	45966	distal	11207491	11371055	+	0.641798	CELF2	13.0518	11.294	10.8702	6.91798	8.68758	3.98146	14.5417	7.6732	10.6164	2.11973	3.80106	7.71857	8.11179
10	11325858	11326424	ENSG00000048740	0.723674	32372	distal	11207491	11371055	+	0.723674	CELF2	6.26485	0.484028	11.5496	2.0347	5.97271	3.31788	2.13849	14.8348	9.90862	3.81551	13.5149	17.5422	4.20611
10	113358225	113358507	ENSG00000230809	-99525	-99525	distal	113257949	113258699	-	-99525	RP11-309P22.1	5.74278	1.45209	2.03816	5.29022	5.97271	2.6543	6.41547	2.55773	2.83104	6.35919	3.80106	4.91182	4.80698
10	113632308	113632724	ENSG00000119927	276899	280903	distal	113909624	113943521	-	276899	GPAM	7.83107	0.484028	1.35877	4.88328	6.51568	13.9351	0.855396	0.511546	2.12328	1.69578	2.1117	2.80675	10.5153
10	11387760	11388105	ENSG00000048740	9085	-25912	distal	11206993	11378674	+	9085	CELF2	1.04414	0.322686	1.35877	2.84858	3.25784	0.331788	0.427698	1.53464	6.36983	2.96762	4.2234	1.40338	5.70829
10	113899883	113900316	ENSG00000119927	9307	13311	distal	113909624	113943521	-	9307	GPAM	12.5297	13.2301	12.9084	12.2082	15.2033	5.30861	35.0712	10.2309	12.7397	11.0226	16.8936	11.227	14.7214
10	113942959	113943851	ENSG00000119927	0.921729	0	promoter	113940310	113974154	-	0.921729	GPAM	25.5815	21.7813	19.7022	21.1609	15.2033	18.2483	36.3543	18.4157	20.525	20.7733	19.4277	16.8405	24.9362
10	114074671	114074978	ENSG00000243316	0.783225	12432	distal	114067977	114098857	-	0.783225	GUCY2GP	3.6545	2.42014	4.75571	3.66246	1.08595	2.98609	7.69857	4.60392	1.7694	2.54367	5.06808	3.50844	3.3048
10	114129085	114129525	ENSG00000197142	-4250	-4250	distal	114133776	114188134	+	-4250	ACSL5	1.04414	19.6838	16.3053	0.81388	3.80082	0.995364	0.427698	5.62701	2.47716	2.11973	1.68936	4.91182	3.90567
10	114135514	114136386	ENSG00000197142	-0.00848968	0	promoter	114135957	114188138	+	-0.00848968	ACSL5	33.4125	46.3054	47.5571	22.7886	26.6057	21.898	27.3727	36.8313	31.1414	21.1973	24.0734	22.454	38.4559
10	114206487	114207366	ENSG00000023041	0.0106324	0	promoter	114190482	114206659	-	0.0106324	ZDHHC6	41.2436	35.9794	36.6869	32.5552	34.7503	27.2066	56.4561	31.2043	38.219	39.427	36.3213	23.1557	29.1423
10	114225168	114225731	ENSG00000151532	0.225505	0.225493	promoter	114207117	114287164	+	0.225505	VTI1A	12.5297	16.6183	15.6259	2.0347	1.08595	0.663576	11.5478	7.6732	6.01595	5.5113	5.49042	7.71857	12.3179
10	114231733	114232070	ENSG00000151532	0.307519	0.307507	promoter	114207117	114287164	+	0.307519	VTI1A	7.83107	3.22686	6.11448	6.51104	5.97271	1.32715	9.83706	2.04619	2.83104	8.47892	7.60213	4.91182	4.20611
10	114286016	114286344	ENSG00000151532	0.985658	22046	distal	114207117	114287164	+	0.985658	VTI1A	1.04414	3.54954	4.07632	3.25552	0.542974	0	1.28309	1.53464	2.12328	2.11973	2.95638	4.91182	2.40349
10	114291970	114292450	ENSG00000151532	0.933042	15940	distal	114207107	114298060	+	0.933042	VTI1A	10.4414	19.0384	22.4198	6.51104	8.1446	0.331788	11.5478	5.11546	8.49311	17.3818	17.316	9.12194	9.91441
10	114295194	114295708	ENSG00000151532	0.968489	12682	distal	114207107	114298060	+	0.968489	VTI1A	3.6545	11.6167	4.75571	2.44164	2.71487	1.32715	1.71079	5.11546	1.7694	11.0226	8.86915	4.21013	3.00437
10	114306316	114306604	ENSG00000151532	0.267304	1786	distal	114207016	114578503	+	0.267304	VTI1A	5.22071	1.45209	3.39694	0.81388	1.62892	0	0.427698	3.58082	5.66207	6.35919	6.3351	8.42025	2.40349
10	11466540	11466889	ENSG00000148429	29055	-104692	distal	11495945	11653753	-	29055	USP6NL	3.13243	0.322686	2.03816	2.0347	3.25784	2.32252	1.71079	2.04619	4.24655	1.69578	1.26702	2.80675	2.10306
10	114709786	114710087	ENSG00000148737	-0.00102563	0	promoter	114710009	114927437	+	-0.00102563	TCF7L2	1.56621	2.74283	4.75571	2.44164	6.51568	2.6543	5.56007	5.11546	3.53879	5.08735	3.80106	5.6135	1.20175
10	11471637	11471843	ENSG00000148429	24101	30665	distal	11495945	11653753	-	24101	USP6NL	1.56621	0	1.35877	2.84858	7.05866	0.663576	0	1.53464	1.06164	0.847892	1.26702	0.701688	1.20175
10	114741263	114741732	ENSG00000148737	0.160651	-5502	distal	114710675	114901075	+	0.160651	TCF7L2	12.5297	1.61343	1.35877	13.429	9.23055	6.30397	2.99389	11.7656	9.55475	9.32681	8.02447	14.0338	24.9362
10	11482350	11482836	ENSG00000148429	13108	19672	distal	11495945	11653753	-	13108	USP6NL	2.08828	0.322686	0.679387	1.22082	2.17189	1.32715	1.28309	7.16165	8.13923	5.93524	2.1117	4.21013	1.20175
10	11490338	11491029	ENSG00000148429	4915	11479	distal	11495945	11653753	-	4915	USP6NL	12.5297	5.32431	6.79387	18.3123	14.1173	11.9444	11.9755	17.9041	25.4793	11.8705	8.86915	29.4709	11.1162
10	114929832	114930178	ENSG00000148737	2394	4391	distal	114710211	114927437	+	2394	TCF7L2	6.26485	1.29074	2.03816	1.62776	3.80082	3.31788	2.13849	1.53464	3.89267	4.6634	6.3351	4.91182	11.717
10	114992965	114993229	ENSG00000148737	65527	67524	distal	114710211	114927437	+	65527	TCF7L2	2.61036	1.1294	3.39694	0.40694	3.25784	1.32715	0.855396	3.58082	2.47716	2.11973	2.95638	7.01688	5.10742
10	11514169	11514477	ENSG00000148429	0.897021	0.83322	promoter	11502509	11615736	-	0.897021	USP6NL	2.61036	1.45209	6.11448	3.66246	2.71487	1.99073	3.84928	6.13856	6.72371	5.5113	5.06808	3.50844	3.60524
10	115141729	115142210	ENSG00000238380	28485	28485	distal	115113184	115113243	+	28485	RNU7-165P	5.74278	15.3276	10.1908	2.44164	4.34379	1.32715	3.84928	10.7425	10.9703	5.5113	4.2234	6.31519	4.50655
10	115144979	115145190	ENSG00000238380	31735	31735	distal	115113184	115113243	+	31735	RNU7-165P	8.35314	6.61505	5.4351	3.25552	1.08595	0.663576	6.41547	3.58082	2.12328	2.54367	2.53404	7.01688	3.60524
10	115280989	115281191	ENSG00000148702	-29404	-29404	distal	115310596	115349361	+	-29404	HABP2	4.17657	0.161343	1.35877	1.22082	1.62892	0.995364	5.13238	0.511546	2.12328	1.69578	2.53404	4.21013	3.00437
10	115323134	115323554	ENSG00000148702	0.340067	-3688	distal	115312831	115343128	+	0.340067	HABP2	7.83107	6.45371	5.4351	2.84858	5.97271	3.98146	8.98166	7.6732	3.89267	8.05497	8.44681	14.0338	9.31353
10	11541523	11542222	ENSG00000148429	0.655436	0.44661	promoter	11502509	11615736	-	0.655436	USP6NL	21.4049	1.61343	3.39694	17.4984	18.4611	10.6172	2.56619	30.1812	33.6185	5.93524	4.2234	16.8405	14.1205
10	115426518	115426876	ENSG00000197893	-2631	-2631	distal	115348596	115423886	-	-2631	NRAP	7.309	4.35626	4.07632	1.22082	0.542974	0.663576	1.28309	4.09237	5.30819	3.81551	1.68936	2.10506	5.70829
10	115439117	115439867	ENSG00000165806	-0.01142	0	promoter	115439699	115490662	+	-0.01142	CASP7	51.685	63.085	53.6716	35.8107	27.1487	19.5755	42.7698	35.8082	33.9724	24.5889	21.117	32.9793	45.3659
10	115440256	115440932	ENSG00000165806	0.0109295	0.0109099	promoter	115439699	115490662	+	0.0109295	CASP7	65.781	67.1186	64.5418	39.4732	36.3792	27.2066	76.1303	40.4122	39.9884	43.6664	42.6564	37.8911	51.6751
10	115441571	115442013	ENSG00000165806	0.0367325	0.0367129	promoter	115439699	115490662	+	0.0367325	CASP7	28.1918	38.0769	42.8014	10.9874	10.3165	9.62185	19.2464	28.1351	26.1871	23.317	20.6947	12.6304	17.1249
10	115448782	115449105	ENSG00000165806	0.178227	0.178208	promoter	115439699	115490662	+	0.178227	CASP7	4.69864	5.647	2.71755	1.62776	0	0	2.56619	2.55773	3.18492	1.69578	5.91276	2.10506	3.00437
10	115464448	115464944	ENSG00000165806	0.485627	-4198	distal	115439699	115490662	+	0.485627	CASP7	9.39728	2.90417	2.03816	1.22082	5.42974	3.31788	20.1018	3.58082	2.12328	5.93524	1.26702	9.12194	2.10306
10	11547494	11547965	ENSG00000148429	0.602701	0.366585	promoter	11502509	11615736	-	0.602701	USP6NL	1.04414	0.322686	0	8.54574	8.68758	1.65894	1.28309	9.71938	9.55475	0.423946	1.26702	6.31519	0.90131
10	115492392	115492566	ENSG00000165806	1729	3129	distal	115439699	115490662	+	1729	CASP7	1.04414	0	0.679387	0	0.542974	0.663576	1.28309	1.02309	1.41552	0.847892	1.26702	1.40338	5.40786
10	115559354	115559592	ENSG00000148735	16165	-20625	distal	115531787	115543188	+	16165	PLEKHS1	3.6545	2.09746	2.03816	3.66246	5.42974	1.65894	4.70468	3.58082	3.53879	2.96762	5.91276	4.91182	3.90567
10	11557565	11557937	ENSG00000148429	0.513756	0.227632	promoter	11502509	11615736	-	0.513756	USP6NL	5.22071	3.06551	10.8702	10.5804	7.05866	5.97219	8.98166	9.71938	7.07759	8.05497	10.1362	11.227	3.3048
10	11558292	11558701	ENSG00000148429	0.507335	0.216986	promoter	11502509	11615736	-	0.507335	USP6NL	6.78692	6.13103	8.83203	8.54574	9.23055	6.63576	9.83706	18.4157	12.0319	5.08735	4.64574	18.2439	8.41222
10	11559373	11559574	ENSG00000148429	0.497788	0.204821	promoter	11502509	11615736	-	0.497788	USP6NL	1.56621	0.322686	0.679387	5.29022	4.34379	3.31788	4.27698	4.60392	5.30819	2.11973	3.37872	7.71857	2.40349
10	115605830	115606231	ENSG00000198924	0.422916	0.393733	promoter	115594488	115614142	-	0.422916	DCLRE1A	4.17657	6.45371	8.83203	2.44164	1.62892	4.64503	5.56007	5.11546	1.7694	2.11973	1.26702	3.50844	0.90131
10	115611400	115611582	ENSG00000198924	0.139514	0.117495	promoter	115594488	115614142	-	0.139514	DCLRE1A	1.56621	6.93774	2.71755	2.44164	3.25784	0.331788	3.84928	3.06928	1.7694	2.96762	3.37872	0	0.90131
10	1156118	1156354	ENSG00000047056	0.707988	-13392	distal	1102798	1178110	+	0.707988	WDR37	3.6545	1.29074	1.35877	1.62776	4.88676	2.32252	6.41547	4.60392	3.89267	2.96762	2.53404	10.5253	1.20175
10	115613815	115615221	ENSG00000198924	0.258888	0	promoter	115613002	115614099	-	0.258888	DCLRE1A	24.0153	30.8165	27.1755	28.8927	22.2619	26.543	35.9266	33.7621	29.7259	30.948	26.1851	23.1557	32.7476
10	115639524	115639797	ENSG00000196865	0.401452	20912	distal	115614420	115676953	+	0.401452	NHLRC2	4.69864	5.32431	4.75571	2.0347	2.71487	0.663576	6.84317	4.09237	5.66207	1.27184	1.68936	5.6135	0.300437
10	115650629	115650794	ENSG00000196865	0.579038	-23735	distal	115614420	115676953	+	0.579038	NHLRC2	1.56621	1.61343	0.679387	0.81388	0	0	1.71079	1.53464	0.353879	0.847892	0.844681	2.80675	0.300437
10	115682864	115683109	ENSG00000196865	5910	5914	distal	115614420	115676953	+	5910	NHLRC2	1.56621	1.1294	2.71755	0.40694	2.17189	0.663576	3.84928	4.60392	3.18492	2.96762	2.95638	2.10506	6.00873
10	11569888	11570072	ENSG00000148429	0.404921	0.0585383	promoter	11502509	11615736	-	0.404921	USP6NL	3.6545	1.93611	0.679387	1.62776	1.08595	1.65894	3.42158	3.06928	4.60043	3.81551	2.95638	4.91182	1.50218
10	11570114	11570355	ENSG00000148429	0.402925	0.0545949	promoter	11502509	11615736	-	0.402925	USP6NL	1.56621	1.77477	1.35877	5.69716	2.17189	1.65894	1.28309	4.09237	2.12328	1.69578	0.844681	9.12194	0.600873
10	115707440	115707814	ENSG00000196865	30486	30490	distal	115614420	115676953	+	30486	NHLRC2	2.08828	7.9058	6.11448	0.40694	3.80082	0.331788	1.28309	2.55773	0.707759	1.27184	3.37872	0	0.90131
10	115719209	115719402	ENSG00000196865	42255	42259	distal	115614420	115676953	+	42255	NHLRC2	3.6545	0.968057	1.35877	2.0347	2.71487	0.331788	1.71079	17.9041	10.2625	2.11973	1.26702	0.701688	0.300437
10	115720224	115720869	ENSG00000196865	43270	43274	distal	115614420	115676953	+	43270	NHLRC2	3.13243	13.8755	12.9084	4.47634	9.77353	6.30397	1.28309	33.2505	34.6802	15.262	15.6266	3.50844	2.40349
10	115721156	115721678	ENSG00000196865	44202	44206	distal	115614420	115676953	+	44202	NHLRC2	2.08828	11.4553	14.9465	3.66246	7.60163	1.32715	23.0957	8.69629	9.90862	2.54367	2.95638	0.701688	4.20611
10	115725569	115725868	ENSG00000196865	48615	48619	distal	115614420	115676953	+	48615	NHLRC2	4.17657	6.13103	4.75571	3.66246	1.08595	0.995364	2.99389	8.18474	9.55475	6.78313	8.86915	7.71857	6.00873
10	115742239	115743259	ENSG00000043591	-60546	-60546	distal	115803806	115806667	+	-60546	ADRB1	13.5738	27.2669	19.7022	9.76656	6.51568	11.6126	40.6313	26.6004	24.7716	18.2297	18.583	23.8574	30.3441
10	11577298	11577723	ENSG00000148429	0.339477	-3023	distal	11502509	11615736	-	0.339477	USP6NL	1.56621	7.42177	9.51142	6.91798	2.71487	1.65894	0.855396	7.16165	6.72371	2.96762	1.68936	11.9287	0.600873
10	115784626	115785447	ENSG00000043591	-18358	-18358	distal	115803806	115806667	+	-18358	ADRB1	30.8022	31.3005	28.5343	7.73186	8.1446	1.99073	2.99389	15.3464	18.4017	13.9902	17.316	16.8405	14.7214
10	115794558	115795122	ENSG00000043591	-8683	-8683	distal	115803806	115806667	+	-8683	ADRB1	1.04414	3.22686	2.71755	0.40694	3.25784	0.995364	2.13849	3.58082	3.53879	7.63102	6.3351	4.21013	1.20175
10	115802826	115803125	ENSG00000043591	-680	-680	promoter	115803806	115806667	+	-680	ADRB1	4.17657	5.96968	3.39694	0.40694	0	0.663576	2.56619	2.04619	1.41552	4.23946	5.49042	4.21013	2.10306
10	115803377	115803626	ENSG00000043591	-179	-179	promoter	115803806	115806667	+	-179	ADRB1	1.56621	7.58311	4.07632	0.40694	0	0	0.855396	0.511546	0.707759	1.69578	1.68936	0.701688	1.50218
10	115808162	115808337	ENSG00000043591	1494	1494	distal	115803806	115806667	+	1494	ADRB1	2.61036	3.3882	4.07632	0	0.542974	0.331788	0.427698	2.04619	0.353879	1.69578	1.26702	2.10506	0.600873
10	11581207	11581761	ENSG00000148429	0.304954	-6932	distal	11502509	11615736	-	0.304954	USP6NL	14.618	7.58311	9.51142	27.265	25.5198	4.31325	4.70468	43.993	39.2806	4.6634	2.53404	29.4709	2.10306
10	115824085	115824276	ENSG00000043591	17417	17417	distal	115803806	115806667	+	17417	ADRB1	0.522071	1.29074	2.03816	0	1.62892	0.331788	5.98777	0	0	0.847892	1.26702	4.91182	0
10	115855772	115856086	ENSG00000253066	-15086	-15086	distal	115871173	115871276	+	-15086	RNU6-709P	0.522071	4.03357	3.39694	0.81388	0	0.331788	9.83706	1.53464	2.12328	4.6634	3.37872	1.40338	2.70393
10	115861099	115861289	ENSG00000253066	-9883	-9883	distal	115871173	115871276	+	-9883	RNU6-709P	2.08828	0.968057	0.679387	0.40694	1.08595	0.663576	0.855396	2.55773	3.53879	2.96762	2.1117	2.10506	1.50218
10	115863183	115863334	ENSG00000253066	-7838	-7838	distal	115871173	115871276	+	-7838	RNU6-709P	0.522071	2.2588	0	1.62776	1.08595	0.995364	4.70468	1.02309	2.83104	5.08735	4.2234	4.21013	4.20611
10	115890936	115891202	ENSG00000165813	0.858614	0	promoter	115890785	115891853	-	0.858614	C10orf118	2.61036	2.74283	3.39694	0.81388	2.17189	0	0	1.53464	0.353879	3.39157	2.53404	2.10506	0.600873
10	115933677	115934790	ENSG00000238742	3.52703	0	promoter	115933864	115933938	-	3.52703	MIR2110	73.612	77.6059	72.6944	69.9937	61.356	42.1371	87.2504	59.8509	72.8992	64.0158	60.3947	47.0131	75.1091
10	11594085	11594542	ENSG00000148429	0.191218	-19810	distal	11502509	11615736	-	0.191218	USP6NL	19.8387	18.5544	25.8167	18.3123	21.7189	10.949	15.3971	24.0427	29.372	9.75075	10.5585	24.5591	4.80698
10	11595979	11596516	ENSG00000148429	0.17449	8669	distal	11502509	11615736	-	0.17449	USP6NL	18.7946	16.1343	12.9084	15.8707	17.3752	7.29934	6.41547	19.4388	25.1254	12.2944	10.9808	17.5422	12.0175
10	11602344	11602696	ENSG00000148429	0.118276	2489	distal	11502509	11615736	-	0.118276	USP6NL	7.83107	3.71088	3.39694	8.54574	6.51568	2.32252	2.56619	7.6732	7.78535	8.47892	6.3351	11.9287	3.3048
10	116063749	116063927	ENSG00000169129	0.247563	0.208794	promoter	116060275	116064892	-	0.247563	AFAP1L2	5.22071	1.45209	3.39694	1.62776	3.25784	0.995364	8.12626	2.55773	2.12328	4.6634	8.86915	11.227	4.50655
10	1161394	1161963	ENSG00000047056	0.778043	-7783	distal	1102798	1178110	+	0.778043	WDR37	6.26485	11.4553	9.51142	2.44164	1.08595	7.96291	20.5295	15.8579	18.4017	13.5663	9.71383	11.9287	14.421
10	11615485	11615982	ENSG00000148429	0.80313	0	promoter	11606126	11653665	-	0.80313	USP6NL	4.17657	6.29237	7.47326	14.2429	9.77353	2.32252	3.42158	14.8348	19.4634	9.32681	8.44681	13.3321	1.80262
10	11620764	11621012	ENSG00000148429	0.692084	-4923	distal	11606126	11653665	-	0.692084	USP6NL	1.04414	2.74283	2.03816	0.81388	0.542974	1.32715	2.56619	3.06928	2.47716	1.69578	1.68936	4.21013	1.50218
10	116231099	116231453	ENSG00000099204	0.738352	-3074	distal	116211404	116286677	-	0.738352	ABLIM1	6.78692	4.67894	8.15264	4.0694	7.05866	5.30861	11.9755	2.04619	2.47716	5.5113	7.17978	8.42025	5.10742
[truncated: 91,063 more rows]
